# Supplementary material
Source: PubMed Central journal article supplement (PMC9385172)

# Hydroesterification and difunctionalization of olefins with N-hydroxyphthalimide esters

Lingying Leng and Joseph M. Ready\*

Department of Biochemistry, UT Southwestern Medical Center, 5323 Harry Hines Blvd., Dallas, Texas 75390

## Supporting information

|                                                                   |    |
|-------------------------------------------------------------------|----|
| Contents .....                                                    | 1  |
| General information .....                                         | 2  |
| Preparation of Substrates and Commercial Unavailable Olefins..... | 3  |
| Optimization of Reaction Conditions .....                         | 11 |
| Fluorescence Quenching Experiments.....                           | 17 |
| Scope of Hydroesterification (terminal olefins) .....             | 19 |
| Scope of Hydroesterification (internal olefins).....              | 28 |
| Difunctionalization of olefins .....                              | 34 |
| Unexpected Oxidations with <b>1a</b> .....                        | 38 |
| Evidence for Radical Intermediates .....                          | 41 |
| Mechanism Exploration .....                                       | 44 |
| Reference .....                                                   | 47 |
| Crystal data for product <b>14b</b> .....                         | 48 |
| NMR Spectra .....                                                 | 49 |

## General Information.

Unless otherwise stated, all solvents were commercial anhydrous products and used directly without further purification. DCM was dried from Glass Contour Solvent Drying System and used directly. Photo-catalyst ( $\text{Ir}(\text{dFppy})_3$ ) was purchased from STREM CHEMICALS. INC. All reactions were performed under nitrogen atmosphere and irradiated by photo-initiator specially stated in related tables and general procedures.

$^1\text{H}$  NMR spectra were recorded on a Bruker UltraShield Plus 600 MHz or Bruker UltraShield Plus 400 MHz unless otherwise noted and are internally referenced to residual proton solvent signals as noted. Data for  $^1\text{H}$  NMR are reported as follows: chemical shift ( $\delta$  ppm), multiplicity (s = singlet, d = doublet, t = triplet, q = quartet, m = multiplet, dd = doublet of doublets, dt = doublet of triplet, ddd = doublet of doublets of doublets), coupling constant (Hz), and integration.  $^{13}\text{C}$  NMR spectra were recorded on a Bruker UltraShield Plus 600 MHz or a Bruker UltraShield Plus 400 MHz and data are reported in terms of chemical shift relative to the solvent signal as noted. Mass spectra were obtained from Agilent technologies 1200 series LC/MS using indicated ionization methods.

**Figure S1. The basic reaction setup**

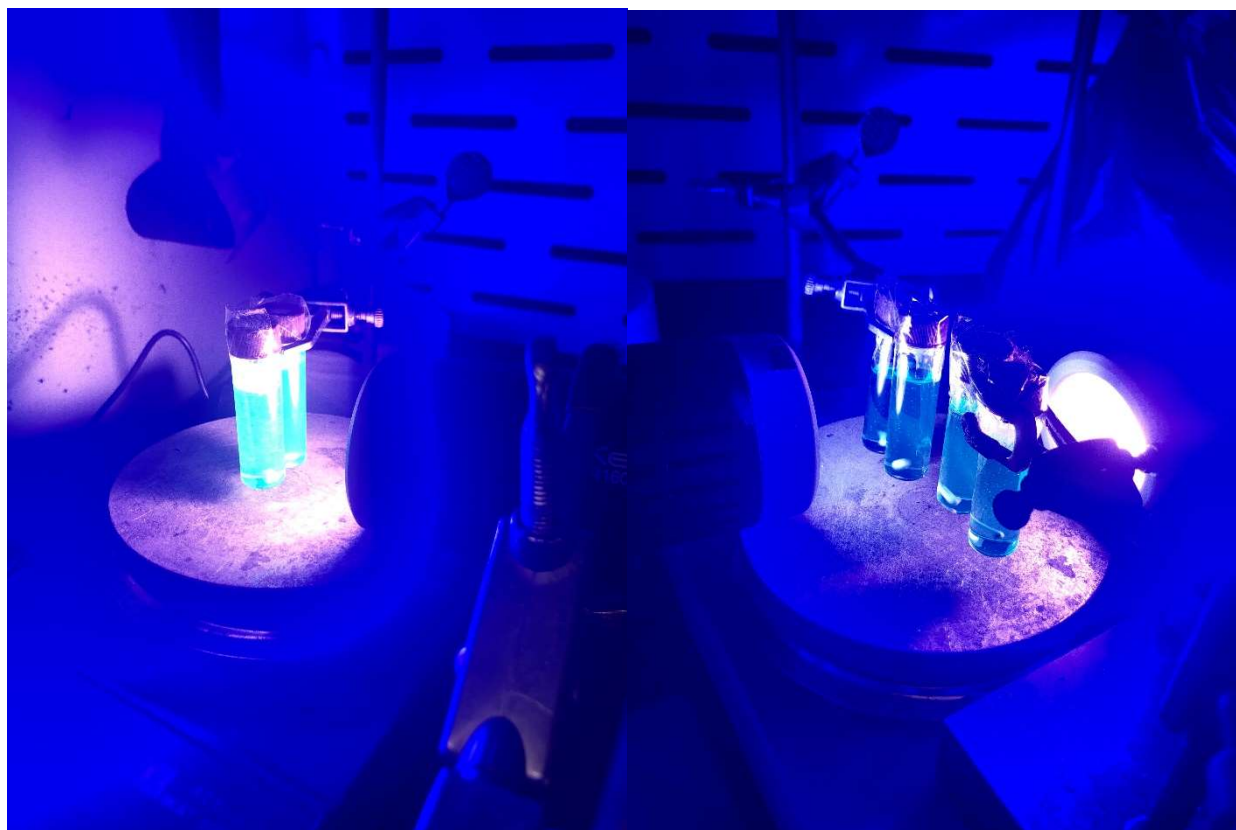

## Preparation of Substrates and Commercial Unavailable Olefins

### Preparation of 4,5,6,7-tetrachloro-1,3-dioxisoindolin-2-yl 4-methoxybenzoate (1a)

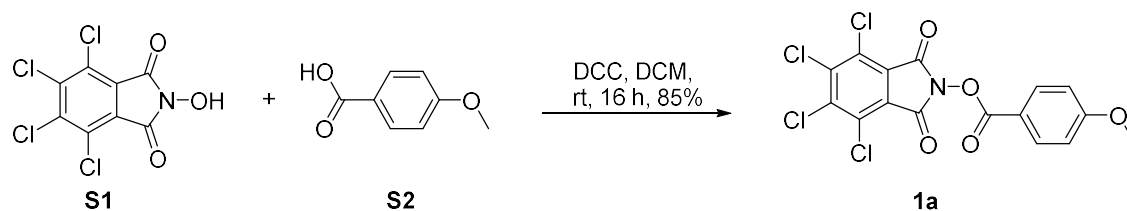

To a suspension of 4,5,6,7-tetrachloro-2-hydroxyisoindoline-1,3-dione (3.00 g, 10.0 mmol, 1 equiv) and 4-methoxybenzoic acid (1.67 g, 11.0 mmol, 1.1 equiv) in dry dichloromethane (80 mL) was added DCC (2.47 g, 12.0 mmol, 1.2 equiv). The mixture was stirred overnight under ambient temperature. After reaction, a yellow suspension was obtained, which was concentrated and then added to the silica-gel column directly, eluted with pure dichloromethane to receive the crude product solution. Combined solutions were concentrated to around 30 mL to obtain a yellow suspension. Then hexane (10 mL) was added to the suspension, followed by filtration. The solid was washed with hexane/dichloromethane (5 mL, 1/1, v/v). After drying on an oil pump, the desired product was obtained as a colorless solid (3.68 g, 85%).

**TLC:** (hexane/ethyl acetate = 3/1, v/v)  $R_f = 0.7$ .

**$^1\text{H NMR}$**  (600 MHz,  $\text{CDCl}_3$ )  $\delta$  8.16 – 8.10 (m, 2H), 7.04 – 6.98 (m, 2H), 3.91 (s, 3H).  **$^{13}\text{C NMR}$**  (150 MHz,  $\text{CDCl}_3$ )  $\delta$  165.11, 161.94, 157.83, 140.94, 133.03, 130.43, 124.82, 116.62, 114.33, 55.66.

**ESI MS**  $m/z$ : 890.7, 892.7 [ $2\text{M}+\text{Na}$ ] $^+$ .

### Preparation of 1,3-dioxisoindolin-2-yl 4-methoxybenzoate (1b)

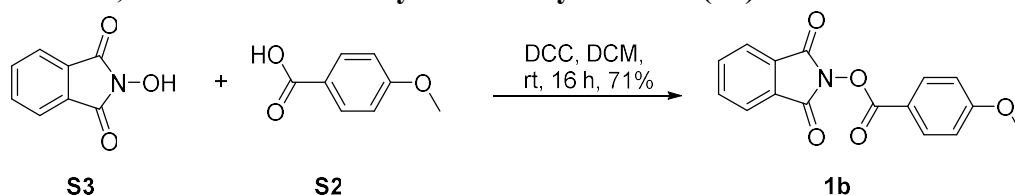

To a suspension of 2-hydroxyisoindoline-1,3-dione (2.00 g, 12.26 mmol, 1 equiv) and 4-methoxybenzoic acid (2.05 g, 13.50 mmol, 1.1 equiv) in dry dichloromethane (60 mL) was added DCC (3.04 g, 14.71 mmol, 1.2 equiv). The mixture was stirred overnight under ambient temperature. After reaction, a yellow suspension was obtained, which was concentrated and then added to the silica-gel column and eluted with pure dichloromethane to receive the crude product solution. Combined solutions were concentrated to obtain a yellow residue. Recrystallization of the residue with ethanol provided the target product as a colorless solid (2.60 g, 71%).

**TLC:** (hexane/ethyl acetate = 3/1, v/v)  $R_f = 0.7$ .

**$^1\text{H NMR}$**  (600 MHz,  $\text{CDCl}_3$ )  $\delta$  8.17 – 8.12 (m, 2H), 7.91 (dd,  $J = 5.4, 3.2$  Hz, 2H), 7.83 – 7.76 (m, 2H), 7.02 – 6.97 (m, 2H), 3.90 (s, 3H).  **$^{13}\text{C NMR}$**  (150 MHz,  $\text{CDCl}_3$ )  $\delta$  164.85, 162.38, 162.23, 134.71, 132.91, 129.00, 123.94, 117.19, 114.18, 55.59.

**ESI MS**  $m/z$ : 298.0 [ $\text{M}+\text{H}$ ] $^+$ .

The analytic data is consistent with those reported in the literature.<sup>1</sup>

### Preparation of 1,3-dioxisoindolin-2-yl 4-methoxybenzoate (S6)



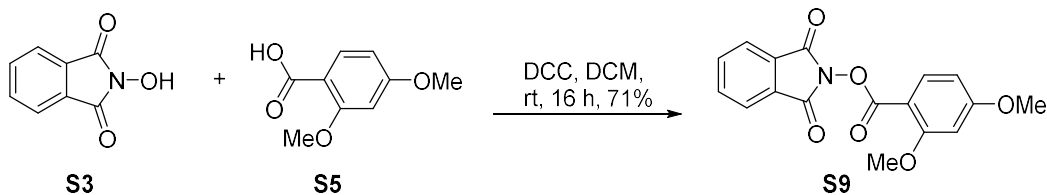

To a suspension of 2-hydroxyisoindoline-1,3-dione (1.00 g, 6.13 mmol, 1.0 equiv) and 2,4-dimethoxybenzoic acid (1.23 g, 6.74 mmol, 1.1 equiv) in dry dichloromethane (50 mL) was added DCC (1.52 g, 7.36 mmol, 1.2 equiv). The mixture was stirred overnight under ambient temperature. After the reaction was complete, a white suspension was obtained, which was concentrated and then added to the silica-gel column and eluted with pure dichloromethane to receive the crude product solution. The combined solutions were concentrated to around 15 mL to obtain a white suspension. Then hexane (5 mL) was added to the suspension, followed by filtration. The solid was washed with hexane/dichloromethane (5 mL, 1/1, v/v). After drying on an oil pump, the desired product was obtained as a white solid (1.42 g, 71%).

**TLC:** (hexane/ethyl acetate = 3/1, v/v)  $R_f = 0.6$ .

**$^1\text{H NMR}$**  (600 MHz,  $\text{CDCl}_3$ )  $\delta$  8.14 (d,  $J = 8.8$  Hz, 1H), 7.91 (dd,  $J = 5.6, 3.2$  Hz, 2H), 7.79 (dd,  $J = 5.6, 3.2$  Hz, 2H), 6.57 (dd,  $J = 8.8, 2.4$  Hz, 1H), 6.51 (d,  $J = 2.4$  Hz, 1H), 3.90 – 3.89 (m, 6H).

**$^{13}\text{C NMR}$**  (150 MHz,  $\text{CDCl}_3$ )  $\delta$  166.22, 163.02, 162.59, 160.66, 134.93, 134.61, 129.23, 123.88, 106.45, 105.26, 98.91, 56.06, 55.71.

**ESI MS**  $m/z$ : 328.1  $[\text{M}+\text{H}]^+$ .

The analytic data is consistent with those reported in the literature.<sup>2</sup>

### Preparation of 4,5,6,7-tetrachloro-1,3-dioxisoindolin-2-yl 3-methoxybenzoate (S11)

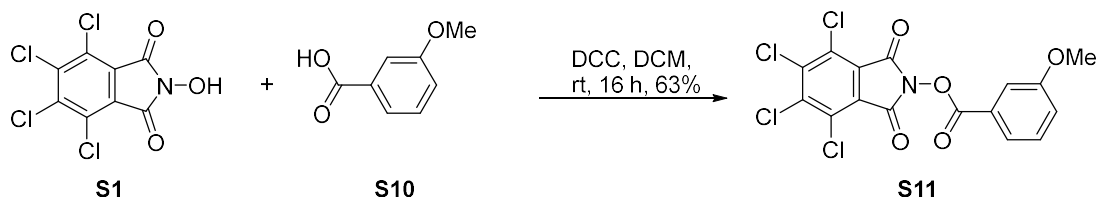

To a suspension of 4,5,6,7-tetrachloro-2-hydroxyisoindoline-1,3-dione (500 mg, 1.66 mmol, 1 equiv) and 3-methoxybenzoic acid (278 mg, 1.83 mmol, 1.1 equiv) in dry dichloromethane (30 mL) was added DCC (411 mg, 2.00 mmol, 1.2 equiv). The mixture was stirred overnight under ambient temperature. After reaction, a yellow suspension was obtained, which was concentrated and then added to the silica-gel column directly and eluted with pure dichloromethane to receive the crude product solution. The combined solutions were concentrated to around 10 mL to obtain a yellow suspension. Then hexane (5 mL) was added to the suspension, followed by filtration. The recovered solid was washed with hexane/dichloromethane (4 mL, 1/1, v/v). After drying on an oil pump, desired product was obtained as a colorless solid (455 mg, 63%).

**TLC:** (hexane/ethyl acetate = 3/1, v/v)  $R_f = 0.7$ .

**$^1\text{H NMR}$**  (600 MHz,  $\text{CDCl}_3$ )  $\delta$  7.79 (dt,  $J = 7.6, 1.2$  Hz, 1H), 7.65 (dd,  $J = 2.8, 1.6$  Hz, 1H), 7.45 (t,  $J = 8.0$  Hz, 1H), 7.26 – 7.23 (m, 1H), 3.88 (s, 3H).  **$^{13}\text{C NMR}$**  (150 MHz,  $\text{CDCl}_3$ )  $\delta$  162.29, 159.78, 157.61, 141.04, 130.51, 130.03, 125.80, 124.76, 123.13, 121.95, 114.72, 55.58.

**ESI MS**  $m/z$ : 890.8, 892.8  $[2\text{M}+\text{Na}]^+$ .

### 4,5,6,7-tetrachloro-1,3-dioxisoindolin-2-yl 2-methoxybenzoate (S13)

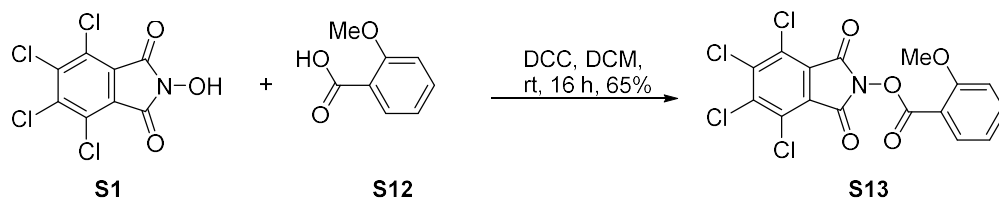

To a suspension of 4,5,6,7-tetrachloro-2-hydroxyisoindoline-1,3-dione (500 mg, 1.66 mmol, 1 equiv) and 2-methoxybenzoic acid (278 mg, 1.83 mmol, 1.1 equiv) in dry dichloromethane (30 mL) was added DCC (411 mg, 2.00 mmol, 1.2 equiv). The mixture was stirred overnight under ambient temperature. After reaction, a yellow suspension was obtained, which was concentrated and then added to the silica-gel column directly and eluted with pure dichloromethane to receive the crude product solution. The combined solutions were concentrated to around 10 mL to obtain a yellow suspension. Then hexane (5 mL) was added to the suspension, followed by filtration. The recovered solid was washed with hexane/dichloromethane (4 mL, 1/1, v/v). After drying on an oil pump, the desired product was obtained as a colorless solid (468 mg, 65%).

**TLC:** (hexane/ethyl acetate = 3/1, v/v)  $R_f = 0.7$ .

**$^1\text{H NMR}$**  (600 MHz,  $\text{CDCl}_3$ )  $\delta$  8.09 (dd,  $J = 7.8, 1.8$  Hz, 1H), 7.64 (ddd,  $J = 8.6, 7.4, 1.8$  Hz, 1H), 7.10 – 7.03 (m, 2H), 3.94 (s, 3H).  **$^{13}\text{C NMR}$**  (150 MHz,  $\text{CDCl}_3$ )  $\delta$  160.87, 160.73, 157.85, 140.89, 136.27, 132.75, 130.39, 124.87, 120.36, 113.58, 112.24, 56.10.

**ESI MS**  $m/z$ : 890.8, 892.8  $[2\text{M}+\text{Na}]^+$ .

#### Preparation of 1,3-dioxoisoindolin-2-yl benzoate (S15)

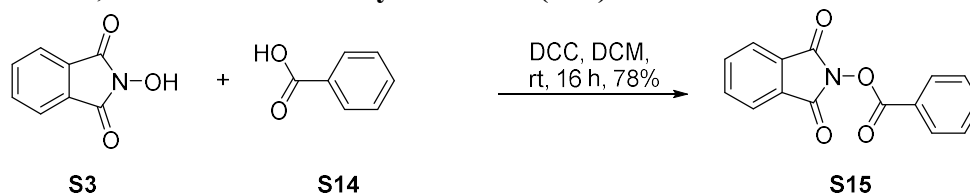

To a suspension of 2-hydroxyisoindoline-1,3-dione (1.00 g, 6.13 mmol, 1.0 equiv) and benzoic acid (823 mg, 6.74 mmol, 1.1 equiv) in dry dichloromethane (50 mL) was added DCC (1.52 g, 7.36 mmol, 1.2 equiv). The mixture was stirred overnight under ambient temperature. After the reaction was complete, a white suspension was obtained, which was concentrated and then added to the silica-gel column and eluted with pure dichloromethane to receive the crude product solution. The combined solutions were concentrated to around 15 mL to obtain a white suspension. Then hexane (10 mL) was added to the suspension, followed by filtration. The solid was washed with hexane/dichloromethane (5 mL, 1/1, v/v). After drying on an oil pump, the desired product was obtained as a white solid (1.28 g, 78%).

**TLC:** (hexane/ethyl acetate = 3/1, v/v)  $R_f = 0.8$ .

**$^1\text{H NMR}$**  (600 MHz,  $\text{CDCl}_3$ )  $\delta$  8.22 – 8.17 (m, 2H), 7.93 (dd,  $J = 5.5, 3.2$  Hz, 2H), 7.85 – 7.78 (m, 2H), 7.73 – 7.67 (m, 1H), 7.57 – 7.51 (m, 2H).  **$^{13}\text{C NMR}$**  (150 MHz,  $\text{CDCl}_3$ )  $\delta$  162.78, 162.04, 134.88, 134.78, 130.62, 128.97, 128.85, 125.23, 124.00.

**ESI MS**  $m/z$ : 268.1  $[\text{M}+\text{H}]^+$ .

The analytic data was consistent with those reported in the literature <sup>3</sup>

#### 1,3-dioxoisoindolin-2-yl 4-(trifluoromethyl)benzoate (S17)

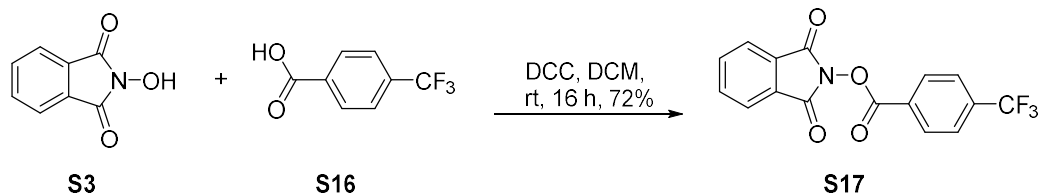

To a suspension of 2-hydroxyisoindoline-1,3-dione (1.00 g, 6.13 mmol, 1.0 equiv) and 4-(trifluoromethyl)benzoic acid (1.28 g, 6.74 mmol, 1.1 equiv) in dry dichloromethane (50 mL) was added DCC (1.52 g, 7.36 mmol, 1.2 equiv). The mixture was stirred overnight under ambient temperature. After the reaction was complete, a white suspension was obtained, which was concentrated and then added to the silica-gel column and eluted with pure dichloromethane to receive the crude product solution. The combined solutions were concentrated to around 20 mL to obtain a white suspension. Then hexane (10 mL) was added to the suspension, followed by filtration. The solid was washed with hexane/dichloromethane (10 mL, 1/1, v/v). After drying on an oil pump, desired product was obtained as a light yellow solid (1.47 g, 72%).

**TLC:** (hexane/ethyl acetate = 3/1, v/v)  $R_f = 0.8$ .

**$^1\text{H NMR}$**  (600 MHz,  $\text{CDCl}_3$ )  $\delta$  8.32 (d,  $J = 8.0$  Hz, 2H), 7.95 – 7.92 (m, 2H), 7.86 – 7.79 (m, 4H).

**$^{13}\text{C NMR}$**  (150 MHz,  $\text{CDCl}_3$ )  $\delta$  161.79, 161.76, 136.14 (q,  $J = 32.9$  Hz), 134.93, 131.03, 128.84, 128.60, 125.90 (q,  $J = 3.8$  Hz), 124.12, 123.25 (q,  $J = 123.25$  Hz).

**ESI MS**  $m/z$ : 336.0  $[\text{M}+\text{H}]^+$ .

#### Preparation of 2,5-dioxopyrrolidin-1-yl 4-methoxybenzoate (S19)

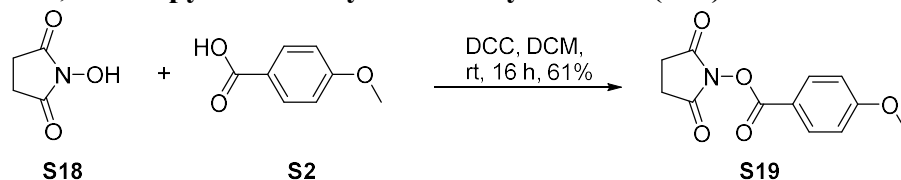

To a suspension of 1-hydroxypyrrolidine-2,5-dione (800 mg, 6.95 mmol, 1 equiv) and 4-methoxybenzoic acid (1.16 g, 7.65 mmol, 1.1 equiv) in dry dichloromethane (40 mL) was added DCC (1.72 g, 8.34 mmol, 1.2 equiv). The mixture was stirred overnight under ambient temperature. After the reaction was complete, a yellow suspension was obtained, which was concentrated and then added to the silica-gel column and eluted with pure dichloromethane to receive the crude product solution. The combined solutions were concentrated to around 10 mL to obtain a white suspension. Then hexane (5 mL) was added to the suspension, followed by filtration. The solid was washed with hexane/dichloromethane (5 mL, 1/1, v/v). After drying on an oil pump, desired product was obtained as a white solid (1.06 g, 61%).

**TLC:** (hexane/ethyl acetate = 3/1, v/v)  $R_f = 0.7$ .

**$^1\text{H NMR}$**  (600 MHz,  $\text{CDCl}_3$ )  $\delta$  8.11 – 8.07 (m, 2H), 7.00 – 6.95 (m, 2H), 3.89 (s, 3H), 2.90 (s, 4H).

**$^{13}\text{C NMR}$**  (150 MHz,  $\text{CDCl}_3$ )  $\delta$  169.46, 164.89, 161.46, 132.88, 117.06, 114.18, 55.60, 25.65.

**ESI MS**  $m/z$ : 250.1  $[\text{M}+\text{H}]^+$ .

The analytic data was consistent with those reported in the literature <sup>4</sup>

#### 4,5,6,7-tetrachloro-1,3-dioxoisindolin-2-yl furan-2-carboxylate (S21)

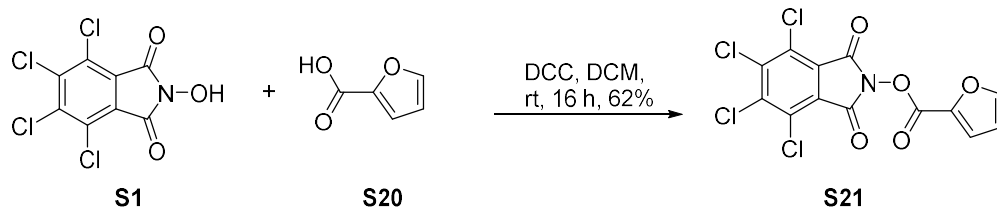

To a suspension of 4,5,6,7-tetrachloro-2-hydroxyisoindoline-1,3-dione (1.00 g, 3.32 mmol, 1.0 equiv) and furan-2-carboxylic acid (410 mg, 3.66 mmol, 1.1 equiv) in dry dichloromethane (50 mL) was added DCC (822 mg, 4.00 mmol, 1.2 equiv). The mixture was stirred overnight under ambient temperature. After the reaction was complete, a yellow suspension was obtained, which was concentrated and then added to the silica-gel column and eluted with pure dichloromethane to receive the crude product solution. The combined solutions were concentrated to around 10 mL to obtain a white suspension. Then hexane (5 mL) was added to the suspension, followed by filtration. The solid was washed with hexane/dichloromethane (5 mL, 1/1, v/v). After drying on an oil pump, desired product was obtained as a light yellow solid (820 mg, 62%).

**TLC:** (hexane/ethyl acetate = 3/1, v/v)  $R_f = 0.5$ .

**$^1\text{H NMR}$**  (600 MHz,  $\text{CDCl}_3$ )  $\delta$  7.78 (dd,  $J = 1.6, 0.8$  Hz, 1H), 7.56 (dd,  $J = 3.6, 0.8$  Hz, 1H), 6.67 (dd,  $J = 3.6, 1.6$  Hz, 1H).  **$^{13}\text{C NMR}$**  (150 MHz,  $\text{CDCl}_3$ )  $\delta$  157.43, 153.95, 149.11, 141.13, 139.35, 130.58, 124.66, 122.78, 112.80.

**ESI MS**  $m/z$ : 395.8  $[\text{M}+\text{H}]^+$ .

#### 4,5,6,7-tetrachloro-1,3-dioxoisoindolin-2-yl pyrazine-2-carboxylate (S23)

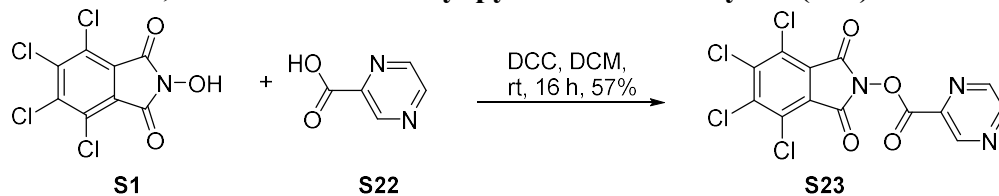

To a suspension of 4,5,6,7-tetrachloro-2-hydroxyisoindoline-1,3-dione (1.00 g, 3.32 mmol, 1.0 equiv) and pyrazine-2-carboxylic acid (453 mg, 3.66 mmol, 1.1 equiv) in dry dichloromethane (50 mL) was added DCC (822 mg, 4.00 mmol, 1.2 equiv). The mixture was stirred overnight under ambient temperature. After the reaction was complete, a yellow suspension was obtained, which was concentrated and then added to the silica-gel column and eluted with pure dichloromethane to receive the crude product solution. The combined solutions were concentrated to around 10 mL to obtain a white suspension. Then hexane (5 mL) was added to the suspension, followed by filtration. The solid was washed with hexane/dichloromethane (5 mL, 1/1, v/v). After drying on an oil pump, desired product was obtained as a light yellow solid (776 mg, 57%).

**TLC:** (hexane/ethyl acetate = 3/1, v/v)  $R_f = 0.3$ .

**$^1\text{H NMR}$**  (600 MHz,  $\text{CDCl}_3$ )  $\delta$  9.44 (d,  $J = 1.4$  Hz, 1H), 8.94 (d,  $J = 2.4$  Hz, 1H), 8.86 (dd,  $J = 2.4, 1.4$  Hz, 1H).  **$^{13}\text{C NMR}$**  (150 MHz,  $\text{CDCl}_3$ )  $\delta$  160.07, 157.06, 149.40, 147.20, 145.07, 141.32, 139.73, 130.73, 124.62.

**ESI MS**  $m/z$ : 407.9  $[\text{M}+\text{H}]^+$ .



## Synthesis of S25

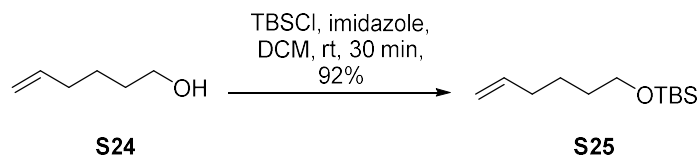

To a solution of hex-5-en-1-ol (600 mg, 6.00 mmol, 1 equiv) in DCM (30 mL) was added imidazole (611 mg, 9.00 mmol, 1.5 equiv), followed by TBSCl (990 mg, 6.60 mmol, 1.1 equiv). The mixture was stirred for 30 min. Water (30 mL) was added to quench the reaction, the organic layer was collected, and aqueous layer was extracted by DCM (20 mL) once. Combined organic layers were dried by anhydrous Na<sub>2</sub>SO<sub>4</sub> and concentrated. The residue was purified by silica gel column chromatography (eluting with hexane/ethyl acetate = 40/1, v/v) to obtain the target product (1.18 g, 92%) as a colorless oil.

**TLC:** (hexane/ethyl acetate = 6/1, v/v) R<sub>f</sub> = 0.9. Visual method: KMnO<sub>4</sub>.

**<sup>1</sup>H NMR** (600 MHz, CDCl<sub>3</sub>) δ 5.81 (ddt, *J* = 16.8, 10.2, 6.6 Hz, 1H), 5.00 (dq, *J* = 17.2, 1.8 Hz, 1H), 4.94 (ddt, *J* = 10.2, 2.2, 1.2 Hz, 1H), 3.61 (t, *J* = 6.4 Hz, 2H), 2.10 – 2.03 (m, 2H), 1.56 – 1.49 (m, 2H), 1.47 – 1.39 (m, 2H), 0.89 (s, 9H), 0.04 (s, 6H). **<sup>13</sup>C NMR** (150 MHz, CDCl<sub>3</sub>) δ 138.95, 114.34, 63.07, 33.53, 32.28, 25.97, 25.13, 18.37, -5.29.

**GC-MS** m/z: 157 [M-*t*-Bu]<sup>+</sup>.

The analytic data was consistent with those reported in the literature.<sup>5</sup>

## Synthesis of S27

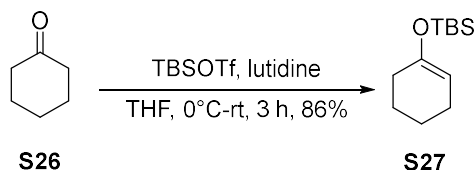

Under cooling of an ice water bath, to a solution of cyclohexanone (600 mg, 6.11 mmol, 1.0 equiv), and 2,6-dimethylpyridine (1.97 g, 18.34 mmol, 3.0 equiv) in dry THF (40 mL) was added *tert*-butyldimethylsilyl trifluoromethanesulfonate (2.42 g, 9.17 mmol, 1.5 equiv). The mixture was warmed to room temperature and stirred for 3 h. After the reaction was complete, a saturated NH<sub>4</sub>Cl aqueous solution (30 mL) was added to quench the reaction. The organic layer was collected and the aqueous phase was extracted with ethyl acetate once (30 mL). The combined organic phases were dried with anhydrous Na<sub>2</sub>SO<sub>4</sub>. After concentration, the residue was purified by silica gel column chromatography. It is essential to mix the silica gel with hexane/trimethylamine solution (1000/1, v/v), and then add to the column. Eluting with Hexane/triethylamine = 1000/1, v/v) provided the target product (1.12 g, 86%) as a colorless oil.

**TLC:** (hexane/DCM = 3/1, v/v) R<sub>f</sub> = 0.8.

**<sup>1</sup>H NMR** (600 MHz, DMSO) δ 4.79 (tt, *J* = 3.8, 1.2 Hz, 1H), 1.98 – 1.89 (m, 4H), 1.63 – 1.55 (m, 2H), 1.49 – 1.38 (m, 2H), 0.88 (s, 9H), 0.09 (s, 6H). **<sup>13</sup>C NMR** (150 MHz, DMSO) δ 150.42, 103.93, 29.94, 26.05, 23.76, 23.11, 22.37, 18.19, -3.95.

**GC-MS** m/z: 212 [M]<sup>+</sup>.

The analytic data was consistent with those reported in the literature.<sup>6</sup>

## Synthesis of S29

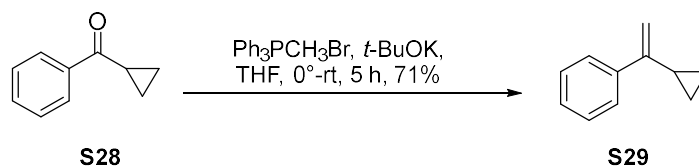

Under cooling of an ice water bath, to a suspension of methyltriphenylphosphonium bromide (1.76 g, 4.93 mmol, 1.2 equiv) in dry tetrahydrofuran (40 mL) was added *t*-BuOK (552 mg, 4.93 mmol, 1.2 equiv). The mixture was stirred for 60 min at 0 °C. **S28** (600 mg, 4.10 mmol, dissolved in 5 mL THF) was added slowly. The mixture was stirred for further 4 h under ambient temperature. After the reaction was complete, a saturated NH<sub>4</sub>Cl aqueous solution (30 mL) was added to quench the reaction. The organic layer was collected and the aqueous phase was extracted with ethyl acetate once (30 mL). The combined organic phases were dried with anhydrous Na<sub>2</sub>SO<sub>4</sub>. After concentration, the residue was purified by silica gel column chromatography (eluting with Hexane/ethyl acetate = 20/1, v/v) to obtain target product (420 mg, 71%) as a colorless oil.

**TLC:** (hexane/ethyl acetate = 6/1, v/v) R<sub>f</sub> = 0.9. Visual method: KMnO<sub>4</sub>.

**<sup>1</sup>H NMR** (600 MHz, CDCl<sub>3</sub>) δ 7.63 – 7.58 (m, 2H), 7.35 (dd, *J* = 8.4, 6.8 Hz, 2H), 7.32 – 7.27 (m, 1H), 5.28 (d, *J* = 1.0 Hz, 1H), 4.94 (t, *J* = 1.2 Hz, 1H), 1.66 (dddd, *J* = 13.6, 8.4, 5.4, 1.2 Hz, 1H), 0.88 – 0.80 (m, 2H), 0.63 – 0.57 (m, 2H). **<sup>13</sup>C NMR** (150 MHz, CDCl<sub>3</sub>) δ 149.31, 141.60, 128.12, 127.43, 126.09, 108.99, 15.60, 6.65.

**GC-MS** m/z: 144 [M]<sup>+</sup>.

The analytic data is consistent with those reported in the literature.<sup>7</sup>

## Synthesis of S32

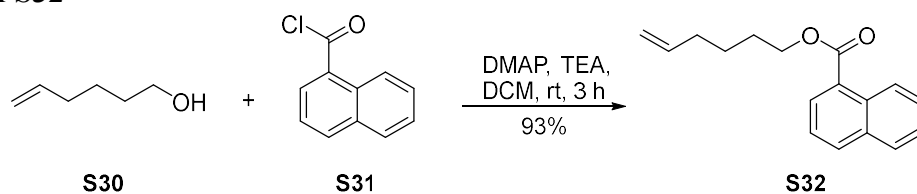

Under cooling of an ice water bath, to a solution of hex-5-en-1-ol (500 mg, 5.00 mmol, 1.0 equiv), 4-*N,N*-dimethylamino pyridine (60 mg, 0.5 mmol, 0.1 equiv), and triethylamine (760 mg, 7.50 mmol, 1.5 equiv) in dry DCM (40 mL) was added 1-naphthoyl chloride (1.05 g, 5.5 mmol, 1.1 equiv). The mixture was warmed to room temperature and stirred for 3 h. After the reaction was complete, a saturated NaHCO<sub>3</sub> aqueous solution (30 mL) was added to quench the reaction. The organic layer was collected and the aqueous phase was extracted with DCM once (30 mL). The combined organic phases were dried with anhydrous Na<sub>2</sub>SO<sub>4</sub>. After concentration, the residue was purified by silica gel column chromatography (eluting with Hexane/DCM = 3/1, v/v) to obtain target product (1.18 g, 93%) as a colorless oil.

**TLC:** (hexane/DCM = 1/1, v/v) R<sub>f</sub> = 0.8.

**<sup>1</sup>H NMR** (600 MHz, CDCl<sub>3</sub>) δ 8.91 (dq, *J* = 8.6, 1.0 Hz, 1H), 8.18 (dd, *J* = 7.2, 1.2 Hz, 1H), 8.02 (dt, *J* = 8.4, 1.2 Hz, 1H), 7.91 – 7.87 (m, 1H), 7.62 (ddd, *J* = 8.5, 6.8, 1.4 Hz, 1H), 7.57 – 7.48 (m, 2H), 5.84 (ddt, *J* = 17.0, 10.2, 6.6 Hz, 1H), 5.06 (dq, *J* = 17.2, 1.6 Hz, 1H), 4.99 (ddt, *J* = 10.2, 2.2, 1.3 Hz, 1H), 4.43 (t, *J* = 6.8 Hz, 2H), 2.20 – 2.13 (m, 2H), 1.89 – 1.82 (m, 2H), 1.65 – 1.59 (m, 2H). **<sup>13</sup>C NMR** (150 MHz, CDCl<sub>3</sub>) δ 167.66, 138.34, 133.80, 133.22, 131.31, 130.04, 128.51, 127.68, 127.40, 126.16, 125.79, 124.48, 114.90, 64.99, 33.32, 28.19, 25.38.

**ESI MS** m/z: 531.2 [2M+Na]<sup>+</sup>.

The analytic data was consistent with those reported in the literature.<sup>8</sup>

# Optimization of Reaction Conditions

**Table S1. Optimizing Catalysts**

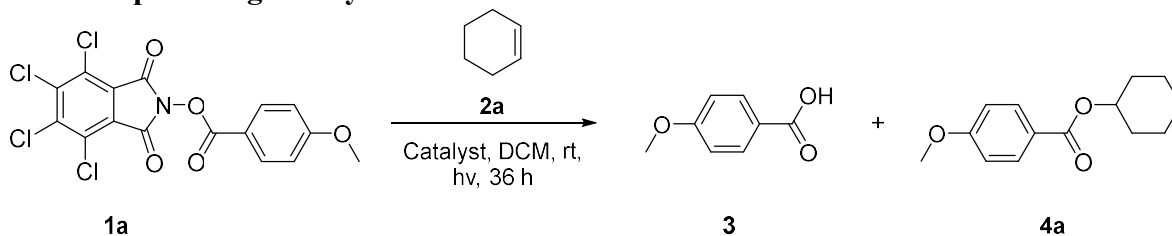

| Entry          | Catalysts                                                        | Light Sources               | Yield<br>3 (%) | Yield<br>4a (%) |
|----------------|------------------------------------------------------------------|-----------------------------|----------------|-----------------|
| 1 <sup>a</sup> | Ru(bpy) <sub>3</sub> Cl <sub>2</sub> ·6H <sub>2</sub> O          | Kessil H150-BLUE            | 0 <sup>b</sup> | 0               |
| 2 <sup>a</sup> | 9-Mes-10-Me-Acr·ClO <sub>4</sub>                                 | Kessil H150-BLUE            | 45             | 38              |
| 3 <sup>a</sup> | Xanthylum·BF <sub>4</sub>                                        | Kessil H150-BLUE            | 53             | 13              |
| 4 <sup>a</sup> | Acridinium·BF <sub>4</sub>                                       | Kessil H150-BLUE            | 28             | 25              |
| 5 <sup>a</sup> | 4CzIPN                                                           | Kessil PR160L-440 nm        | 22             | 62              |
| 6 <sup>a</sup> | perylene                                                         | Kessil PR160L-390 nm        | 74             | 14              |
| 7 <sup>a</sup> | 10-Phenylphenothiazine                                           | Kessil PR160L-390 nm        | 55             | 8               |
| 8 <sup>a</sup> | Eosin Y                                                          | Kessil H150-BLUE            | 29             | 43              |
| 9              | Ir(ppy) <sub>2</sub> (dtbbpy)PF <sub>6</sub>                     | Kessil PR160L-440 nm        | 18             | 73              |
| 10             | Ir(dF(CF <sub>3</sub> )ppy) <sub>2</sub> (dtbbpy)PF <sub>6</sub> | Kessil PR160L-440 nm        | 40             | 10              |
| 11             | Ir(ppy) <sub>3</sub>                                             | Kessil PR160L-440 nm        | 11             | 81              |
| <b>12</b>      | <b>Ir(dFppy)<sub>3</sub></b>                                     | <b>Kessil PR160L-440 nm</b> | <b>&lt;5</b>   | <b>87</b>       |

Unless otherwise noted the reactions were conducted with substrate **1a** (44.0 mg, 0.1 mmol, 1.0 equiv), DCM (5.0 mL), catalysts (0.01 equiv, shown in table), cyclohexene (5.0 equiv), carried out under ambient temperature (actual reaction solution temperature: 40 - 45 °C) and nitrogen atmosphere. Reactions were irradiated by blue LED (shown in table) for 36 h. Yields were obtained by <sup>1</sup>H NMR integrations by using 1,3,5-trimethoxybenzene as internal standard sample. <sup>a</sup> catalyst (0.05 equiv), <sup>b</sup> substrate **1a** recovered.

## The Chemical Structures of the Catalysts in Figure 1

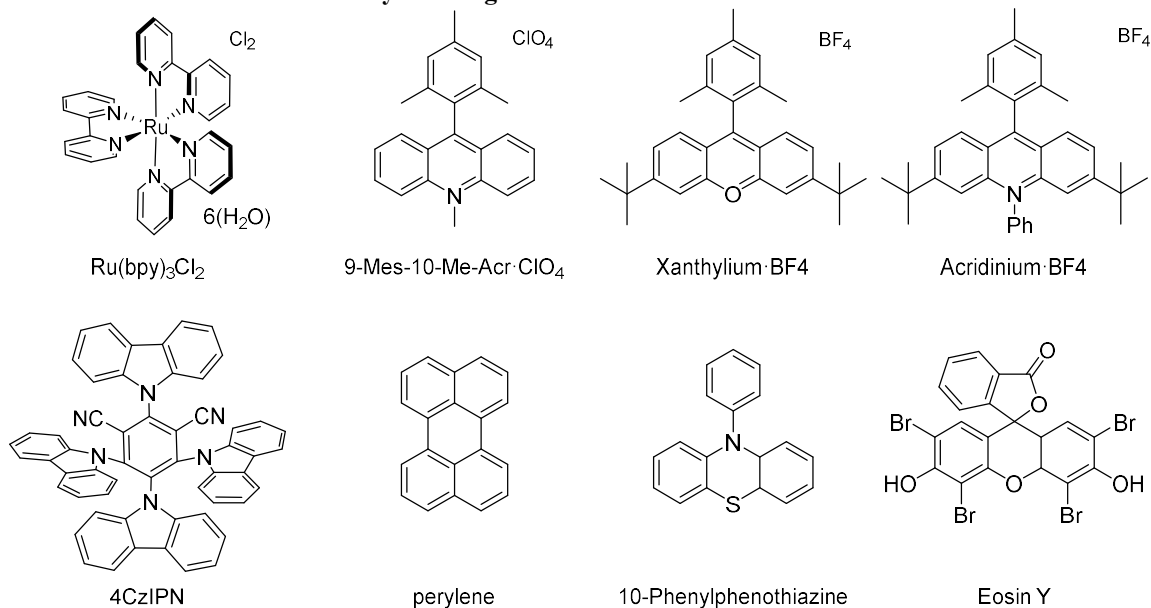

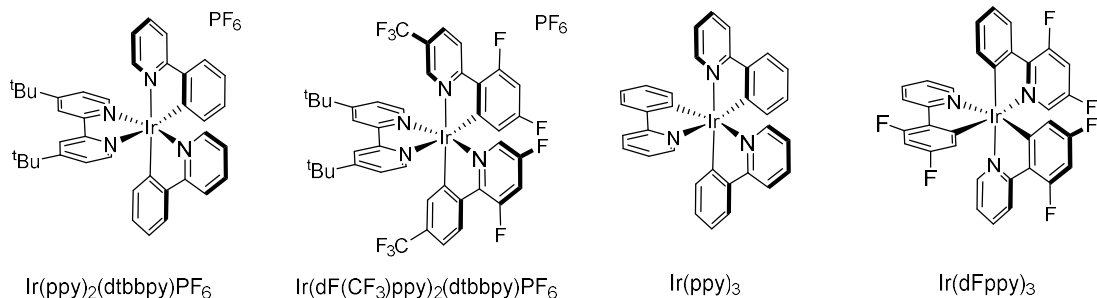

**Table S2. Optimizing Light Source**

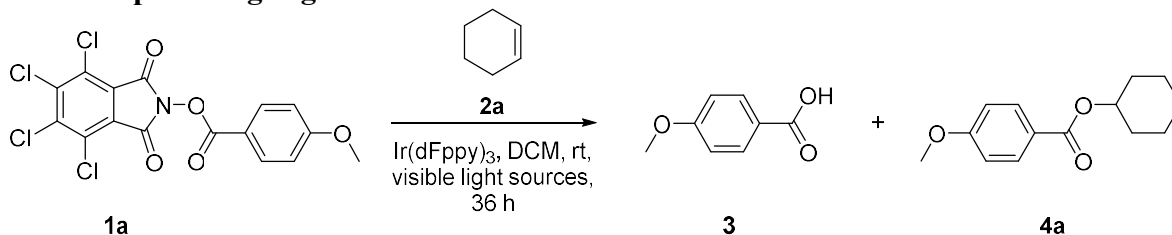

| Entry    | Catalysts                              | Light Sources               | Yield<br><b>3</b> (%) | Yield<br><b>4a</b> (%) |
|----------|----------------------------------------|-----------------------------|-----------------------|------------------------|
| 1        | none                                   | 254 nm (Rayonet)            | 0 <sup>a</sup>        | 0 <sup>a</sup>         |
| 2        | none                                   | PR m2 365 nm                | 43 <sup>b</sup>       | 8                      |
| 3        | none                                   | Kessil PR160L-440 nm        | <5 <sup>b</sup>       | <5                     |
| 4        | none                                   | Kessil PR160L-427 nm        | <5 <sup>b</sup>       | <5                     |
| 5        | $\text{Ir(dFppy)}_3$                   | PR m2 365 nm                | 38                    | 50                     |
| 6        | $\text{Ir(dFppy)}_3$                   | Kessil PR160L-390 nm        | 21                    | 73                     |
| <b>7</b> | <b><math>\text{Ir(dFppy)}_3</math></b> | <b>Kessil PR160L-427 nm</b> | <b>&lt;5</b>          | <b>91</b>              |
| 8        | $\text{Ir(dFppy)}_3$                   | Kessil PR160L-440 nm        | <5                    | 87                     |
| 9        | $\text{Ir(dFppy)}_3$                   | PR m2 450 nm                | <5                    | 76                     |
| 10       | $\text{Ir(dFppy)}_3$                   | Kessil H150-BLUE            | <5                    | 72                     |
| 11       | $\text{Ir(dFppy)}_3$                   | None (heating to 40 °C)     | 0 <sup>b</sup>        | 0                      |

Unless otherwise noted, the reactions were conducted with substrate **1a** (44.0 mg, 0.1 mmol, 1.0 equiv), DCM (5.0 mL), catalysts (0.01 equiv), cyclohexene (5.0 equiv), carried out under ambient temperature (actual reaction solution temperature: 40 - 45 °C) and nitrogen atmosphere. Reactions were irradiated by blue LED (shown in table) for 36 h. Yields were obtained by <sup>1</sup>H NMR integrations by using 1,3,5-trimethoxybenzene as internal standard sample. <sup>a</sup> substrate decomposed. <sup>b</sup> Substrate **1a** remained.

**Table S3. Effect of Additives**

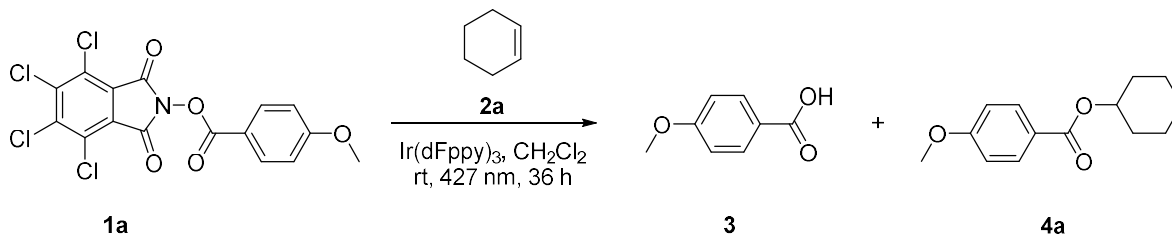

| Entry          | Catalysts                              | Additives<br>(3.0 equiv) | Yield<br><b>3</b> (%) | Yield<br><b>4a</b> (%) |
|----------------|----------------------------------------|--------------------------|-----------------------|------------------------|
| <b>1</b>       | <b><math>\text{Ir(dFppy)}_3</math></b> | <b>none</b>              | <b>&lt;5</b>          | <b>91</b>              |
| 2 <sup>a</sup> | $\text{Ir(dFppy)}_3$                   | none                     | 39 <sup>b</sup>       | 0                      |
| 3 <sup>c</sup> | $\text{Ir(dFppy)}_3$                   | none                     | 14 <sup>d</sup>       | 29                     |
| 4 <sup>c</sup> | $\text{Ir(dFppy)}_3$                   | PhMe                     | 17                    | 26                     |
| 5 <sup>c</sup> | $\text{Ir(dFppy)}_3$                   | PhCH <sub>2</sub> Ph     | 12                    | 33                     |

|                |                        |                                   |                |    |
|----------------|------------------------|-----------------------------------|----------------|----|
| 6 <sup>c</sup> | Ir(dFppy) <sub>3</sub> | <i>t</i> -BuSH                    | 71             | 8  |
| 7 <sup>c</sup> | Ir(dFppy) <sub>3</sub> | ( <i>n</i> -Bu) <sub>3</sub> SnH  | 71             | 9  |
| 8 <sup>c</sup> | Ir(dFppy) <sub>3</sub> | (TMS) <sub>3</sub> SiH            | 48             | 24 |
| 9              | Ir(dFppy) <sub>3</sub> | DIPEA                             | 87             | 0  |
| 10             | Ir(dFppy) <sub>3</sub> | quinuclidine                      | 42             | 45 |
| 11             | Ir(dFppy) <sub>3</sub> | Hantzsch ester                    | 89             | 0  |
| 12             | Ir(dFppy) <sub>3</sub> | Cu(OAc) <sub>2</sub> <sup>c</sup> | 9 <sup>f</sup> | 16 |

Unless otherwise noted, the reactions were conducted with substrate **1a** (44.0 mg, 0.1 mmol, 1.0 equiv), DCM (5.0 mL), catalysts (0.01 equiv), cyclohexene (5.0 equiv), under ambient temperature (actual reaction solution temperature: 40 - 45 °C) and nitrogen atmosphere, irradiated by blue LED (Kessil PR160L-427 nm) for 36 h. Yields were obtained by <sup>1</sup>H NMR integrations by using 1,3,5-trimethoxybenzene as internal sample. <sup>a</sup>Without cyclohexene. <sup>b</sup>40 % starting material **1a** remained. <sup>c</sup>Cyclohexene (1.1 equiv). <sup>d</sup>48 % starting material **1a** remained. <sup>e</sup>Cu(OAc)<sub>2</sub> (0.1 equiv). <sup>f</sup>49 % starting material **1a** recovered. DIPEA: N,N-diisopropylethylamine. Hantzsch ester: Diethyl 1,4-dihydro-2,6-dimethyl-3,5-pyridinedicarboxylate;

**Table S4. Optimizing Solvents**

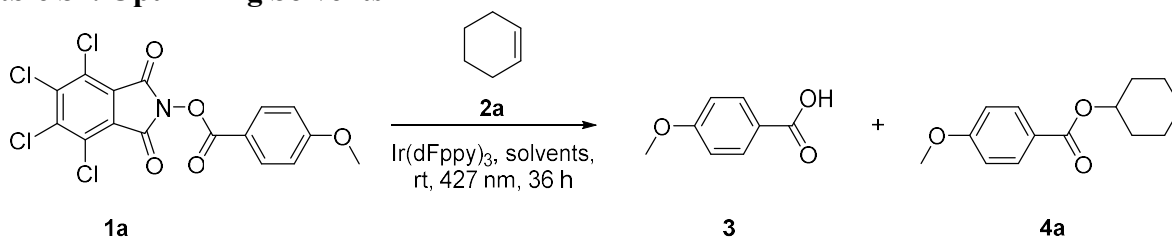

| Entry    | Solvents                             | Yield<br><b>3</b> (%) | Yield<br><b>4a</b> (%) |
|----------|--------------------------------------|-----------------------|------------------------|
| <b>1</b> | <b>DCM</b>                           | <b>&lt;5</b>          | <b>91</b>              |
| 2        | CHCl <sub>3</sub>                    | 43                    | 20                     |
| 3        | DCE                                  | 10                    | 89                     |
| 4        | CH <sub>3</sub> CN                   | 10                    | 77                     |
| 5        | acetone                              | 22                    | 72                     |
| 6        | ethyl acetate                        | 10                    | 57                     |
| 7        | MeOH                                 | 58                    | 13                     |
| 8        | CF <sub>3</sub> CH <sub>2</sub> OH   | 52                    | <5                     |
| 9        | (CF <sub>3</sub> ) <sub>2</sub> CHOH | 47                    | <5                     |
| 10       | PhCF <sub>3</sub>                    | 19                    | 39                     |
| 11       | PhMe                                 | 8                     | 43                     |
| 12       | THF                                  | 76                    | 12                     |
| 13       | DME                                  | 55                    | 17                     |
| 14       | dioxane                              | 60                    | 13                     |
| 15       | DMF                                  | 65                    | <5                     |
| 16       | DMSO                                 | 76                    | <5                     |

Unless otherwise noted, the reactions were conducted with substrate **1a** (44.0 mg, 0.1 mmol, 1.0 equiv), solvents (5.0 mL), catalysts (Ir(dFppy)<sub>3</sub>, 0.01 equiv), cyclohexene (5.0 equiv), carried out under ambient temperature and nitrogen atmosphere, irradiated by blue LED (Kessil PR160L-427 nm) for 36 h. Yields were obtained by <sup>1</sup>H NMR integrations by using 1,3,5-trimethoxybenzene as internal sample. DCE: 1,2-dichloroethane, DME: 1,2-dimethoxyethane.

**Figure S2. N-Acyloxy imides**

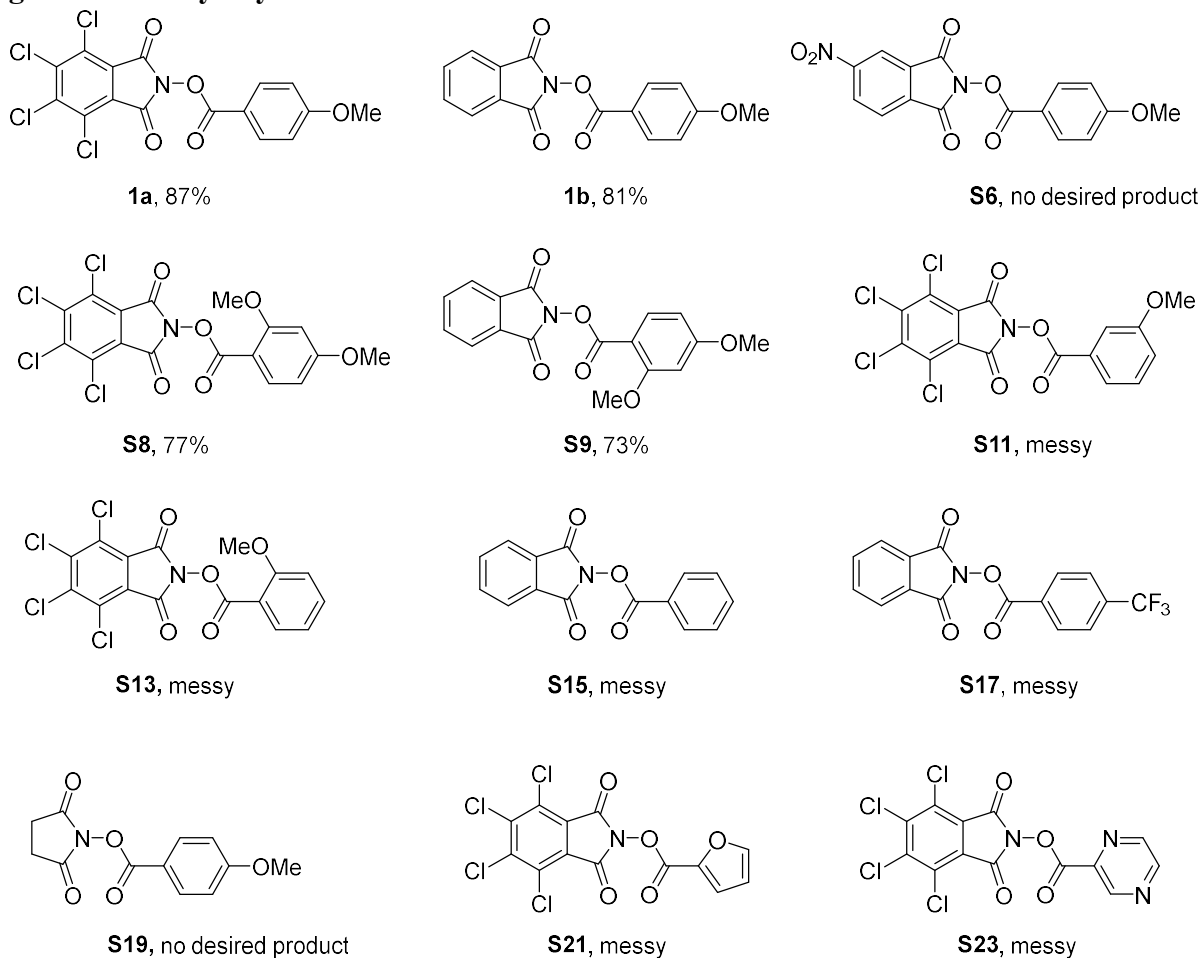

The reactions were conducted with substrate (0.1 mmol, 1.0 equiv), solvents (DCM, 5.0 mL), Ir(dFppy)<sub>3</sub> (0.01 equiv), cyclohexene (5.0 equiv), carried out under ambient temperature (actual reaction solution temperature: 40 - 45 °C) and nitrogen atmosphere, irradiated by blue LED (Kessil PR160L-427 nm) for 24 h. isolated yields.

### General procedure A for optimization studies (Tables S1 – S4, Figure S2)

An 8 mL dry vial equipped with a magnetic stirring bar was charged with substrate the appropriate N-acyloxy imide (44.0 mg for **1a**, 0.10 mmol, 1.0 equiv), photocatalyst (0.01 equiv or 0.05 equiv), cyclohexene (5.0 equiv or 1.1 equiv) and additive (0.1 equiv or 3 equiv as indicated). Then solvent (5.0 mL) was added sequentially. The mixture was protected by nitrogen, irradiated by blue LED for 36 h under ambient temperature. After reaction, 1,3,5-trimethoxybenzene (5.6 mg, 0.033 mmol, 0.33 equiv) was added to reaction solution. The reaction mixture was stirred for 5 min, filtered by Celite and washed with DCM (2 mL). The filtrate was concentrated under vacuum. The residue was further dried under oil pump, and yields were obtained by <sup>1</sup>H NMR relative to the internal standard.

### Purification of **3**, **4a**, **S33**:

After the reaction, the solution was filtered and washed by DCM (2 mL), the white solid was collected and further dried by oil pump to recover 4,5,6,7-tetrachloroisindoline-1,3-dione **S33** as a white solid. The filtrate was concentrated and the residue was purified by silica-gel column

chromatography to get target product **4a** as a colorless oil and 4-methoxybenzoic acid **3** as a white solid.

**3**

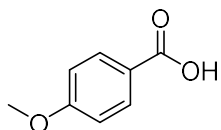

**TLC:** (hexane/ethyl acetate = 3/1, v/v)  $R_f = 0.1$ .

**Purification:** eluting with hexane/ ethyl acetate = 1/1, v/v.

**$^1\text{H NMR}$**  (600 MHz,  $\text{CDCl}_3$ )  $\delta$  12.21 (m, 1H), 8.10 – 8.05 (m, 2H), 6.98 – 6.93 (m, 2H), 3.88 (s, 3H).

**$^{13}\text{C NMR}$**  (150 MHz,  $\text{CDCl}_3$ )  $\delta$  171.57, 164.03, 132.35, 121.58, 113.73, 55.48.

**ESI MS**  $m/z$ : 151.0  $[\text{M}-\text{H}]^-$ .

**4a**

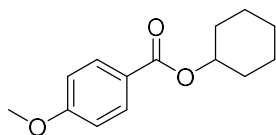

**TLC:** (hexane/ethyl acetate = 3/1, v/v)  $R_f = 0.8$ .

**Purification:** eluting with hexane/ ethyl acetate = 15/1, v/v.

**$^1\text{H NMR}$**  (600 MHz,  $\text{CDCl}_3$ )  $\delta$  8.03 – 7.97 (m, 2H), 6.94 – 6.88 (m, 2H), 5.00 (tt,  $J = 8.6, 3.8$  Hz, 1H), 3.86 (s, 3H), 1.97 – 1.90 (m, 2H), 1.78 (ddt,  $J = 14.2, 9.8, 4.2$  Hz, 2H), 1.62 – 1.53 (m, 3H), 1.44 (dtt,  $J = 13.6, 10.0, 3.6$  Hz, 2H), 1.34 (tdd,  $J = 13.2, 8.4, 4.8$  Hz, 1H).

**$^{13}\text{C NMR}$**  (150 MHz,  $\text{CDCl}_3$ )  $\delta$  165.76, 163.12, 131.50, 123.44, 113.46, 72.63, 55.40, 31.68, 25.49, 23.67.

**ESI MS**  $m/z$ : 235.1  $[\text{M}+\text{H}]^+$ .

The analytic data was consistent with those reported in the literature.<sup>9</sup>

**S33**

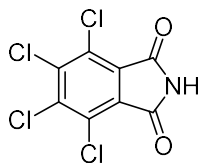

**TLC:** (hexane/ethyl acetate = 3/1, v/v)  $R_f = 0.3$ .

**Purification:** direct filtration.

**$^1\text{H NMR}$**  (600 MHz, DMSO)  $\delta$  11.94 (s, 1H).

**$^{13}\text{C NMR}$**  (150 MHz, DMSO)  $\delta$  165.05, 138.40, 129.66, 128.36.

**ESI MS**  $m/z$ : 285.8  $[\text{M}+\text{H}]^+$ .

The analytic data is consistent with those reported in the literature<sup>10</sup>

**For the substrate S8 and S9 in Figure S2, the procedure and data is following.**

**Substrate S8**

An 8 mL dry vial equipped with a magnetic stirring bar was charged with **S8** (46.5 mg, 0.10 mmol, 1.0 equiv), Ir(dFppy)<sub>3</sub> (0.8 mg, 1.00 μmol, 0.01 equiv), and dry DCM (5.0 mL). Then cyclohexene (41.5 mg, 0.5 mmol, 5.0 equiv) was added. The reaction mixture was protected by nitrogen, irradiated by blue LED (Kessil PR160L-427 nm) for 24 h (the internal temperature of reaction solution is 40 – 45 °C). After reaction, the reaction mixture was filtered by Celite and washed with DCM (2 mL). The filtrate was concentrated under vacuum. The residue was purified directly by silica-gel column chromatography to obtain products **S34** (20.3 mg, 77%) as an oil.

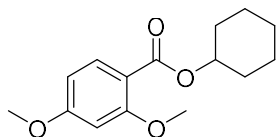

**S34**

**TLC:** (hexane/ethyl acetate = 3/1, v/v)  $R_f = 0.5$ .

**Purification:** eluting with hexane/ ethyl acetate = 8/1, v/v.

**<sup>1</sup>H NMR** (600 MHz, CDCl<sub>3</sub>)  $\delta$  7.84 (d,  $J = 8.4$  Hz, 1H), 6.51 – 6.46 (m, 2H), 4.99 (tt,  $J = 8.4, 3.8$  Hz, 1H), 3.88 (s, 3H), 3.84 (s, 3H), 1.95 – 1.87 (m, 2H), 1.77 (ddp,  $J = 13.2, 6.4, 3.6$  Hz, 2H), 1.61 – 1.50 (m, 3H), 1.43 (dtt,  $J = 13.3, 9.8, 3.6$  Hz, 2H), 1.34 (ddt,  $J = 16.2, 9.8, 4.8$  Hz, 1H). **<sup>13</sup>C NMR** (150 MHz, CDCl<sub>3</sub>)  $\delta$  165.00, 163.99, 161.37, 133.59, 113.22, 104.40, 98.98, 72.27, 55.96, 55.49, 31.64, 25.59, 23.63.

**ESI MS**  $m/z$ : 265.1 [M+H]<sup>+</sup>.

#### For substrate **S9**

Following the procedure described for **S8**, substrate **S9** (33.0 mg, 0.10 mmol, 1.0 equiv) was added to the reaction solution. After reaction and work up, product **S34** (19.5 mg, 73%) was obtained (characterization data provided above).



## Fluorescence Quenching Experiments

Experimental Details: all fluorescence data was acquired on an ISS PC1 photon counting spectrofluorimeter with a 300 W high-pressure xenon arc lamp. Stock solution of Ir(dFppy)<sub>3</sub> (1 mmol/L, 5mL); 4,5,6,7-tetrachloro-1,3-dioxoisoindolin-2-yl 4-methoxybenzoate (**1a**, 10 mmol/L, 10 mL), and cyclohexane (100 mmol/L, 10 mL) were prepared in HPLC-grade degassed 1,2-dichloroethane (DCE). Stock solutions were combined by volume (v) to give 2 mL samples which each contained 0.05 mmol/L Ir(dFppy)<sub>3</sub> as well as the concentration of reagents indicated in the “concentration” column of each table. After preparing these stock solutions in separate vials, the volume was transferred to a nitrogen protected 1 cm path cuvette. Samples were excited at 378 nm, then collected from 430-520 nm. Intensities were recorded at 474 nm ( $\lambda_{\max}$  emissions of Ir(dFppy)<sub>3</sub>).

**Table S5. Design and results of Stern-Volmer quenching studies.**

| Experiment | Ir(dFppy) <sub>3</sub><br>mmol/L(v) | <b>1a</b><br>mmol/L(v) | Cyclohexene<br>mmol/L(v) | DCE<br>(v) | Emission<br>height | F <sub>0</sub> /F |
|------------|-------------------------------------|------------------------|--------------------------|------------|--------------------|-------------------|
| 1          | 0.05 (100 $\mu$ L)                  | 0 (0 $\mu$ L)          | 0                        | 1.90 mL    | 85.56              | 1                 |
| 2          | 0.05 (100 $\mu$ L)                  | 0.125 (25 $\mu$ L)     | 0                        | 1.88 mL    | 44.34              | 1.92              |
| 3          | 0.05 (100 $\mu$ L)                  | 0.250 (50 $\mu$ L)     | 0                        | 1.85 mL    | 29.86              | 2.86              |
| 4          | 0.05 (100 $\mu$ L)                  | 0.375 (75 $\mu$ L)     | 0                        | 1.83 mL    | 22.69              | 3.77              |
| 5          | 0.05 (100 $\mu$ L)                  | 0.50 (100 $\mu$ L)     | 0                        | 1.80 mL    | 18.47              | 4.6               |
| 6          | 0.05 (100 $\mu$ L)                  | 0                      | 25 (500 $\mu$ L)         | 1.40 mL    | 80.35              | 1.06              |
| 7          | 0.05 (100 $\mu$ L)                  | 0                      | 50 (1.00 mL)             | 0.90 mL    | 81.30              | 1.05              |

**Figure S3. Stern-Volmer quenching of Ir(dFppy)<sub>3</sub> by 1a.**

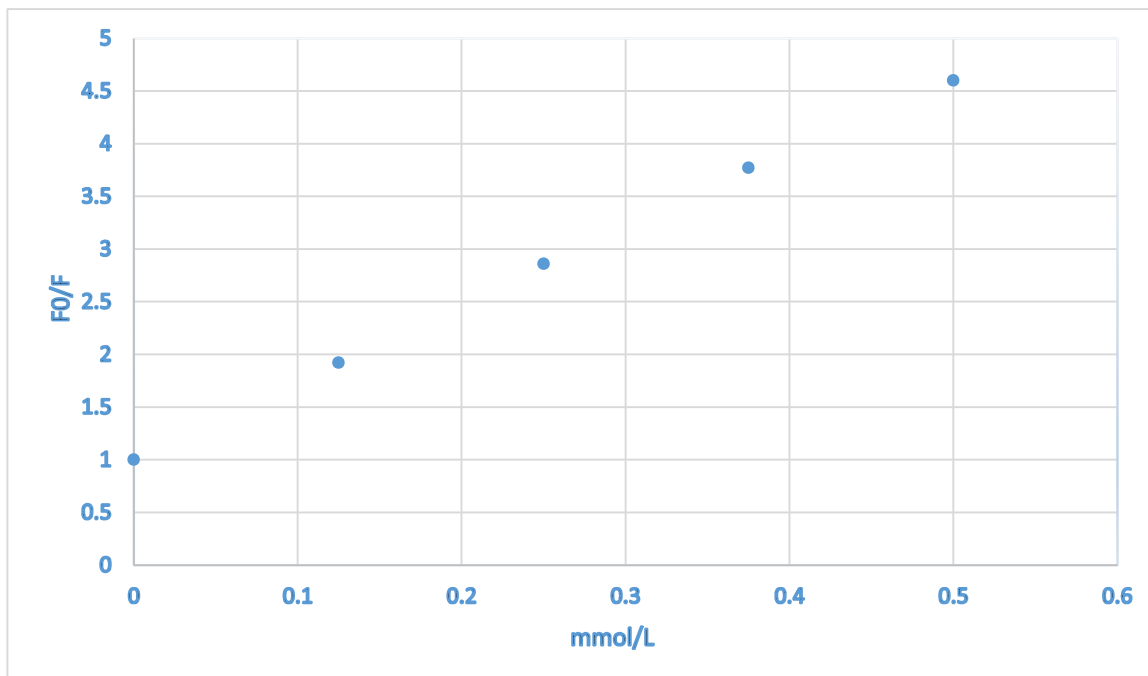

Figure S4. Stern-Volmer quenching of Ir(dFppy)<sub>3</sub> by cyclohexene.

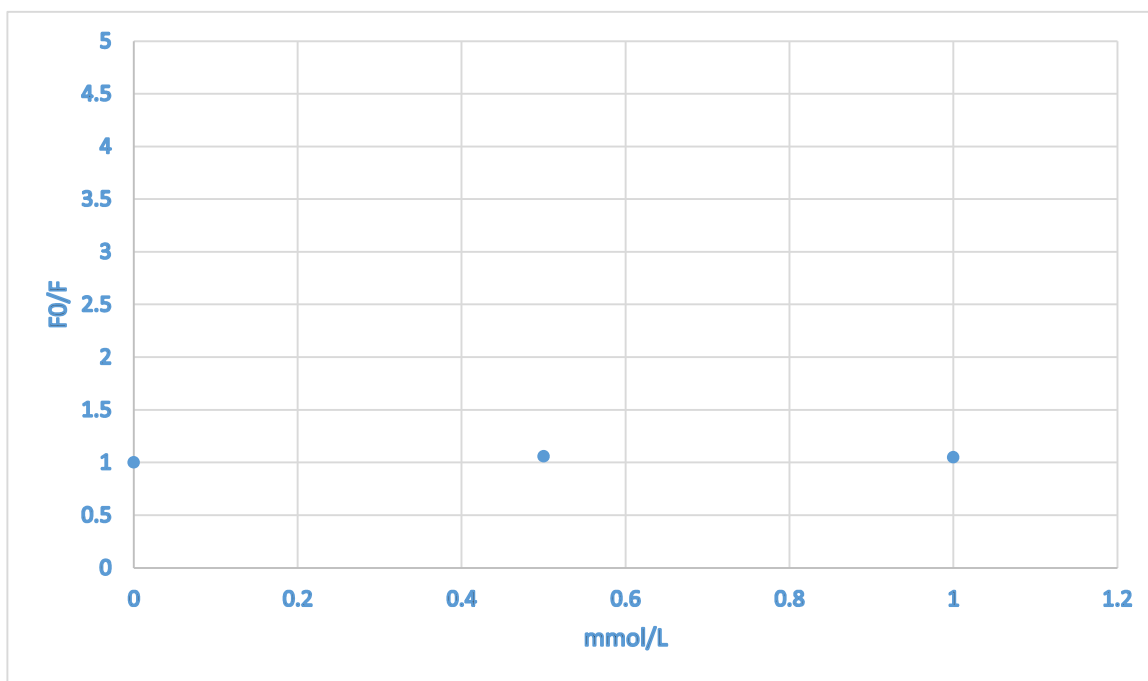

## Scope of Hydroesterification (terminal olefins)

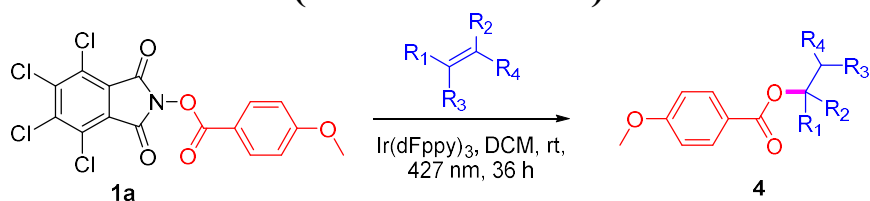

### Terminal olefins

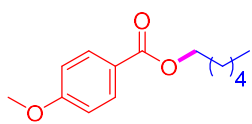

**4b**: 46%, rr = 4.5/1

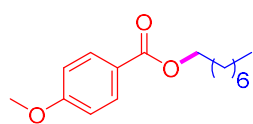

**4c**: 55%, rr = 3.8/1

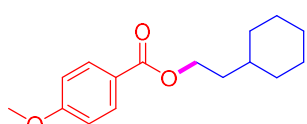

**4d**: 61%, rr > 10/1

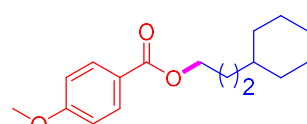

**4e**: 65%, rr = 6.2/1

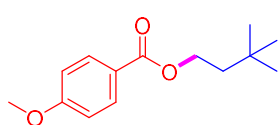

**4f**: 7%, rr = 2.0/1

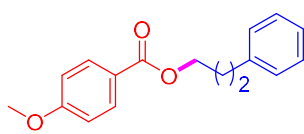

**4g**: 52%, rr = 4.7/1

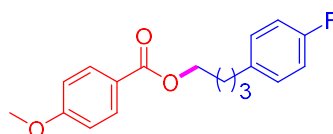

**4h**: 67%, rr > 10/1

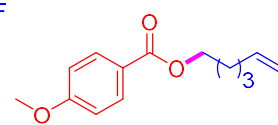

**4i**: 53%, rr = 4.0/1

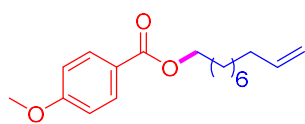

**4j**: 53%, rr = 5.5/1

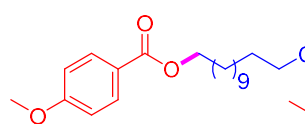

**4k**: 50%, rr = 3.9/1

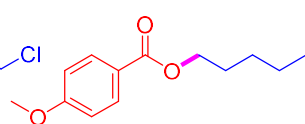

**4l**: 54%, rr = 5.4/1

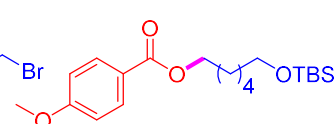

**4m**: 44%, rr = 3.6/1

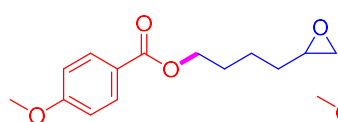

**4n**: 61%, rr = 3.6/1

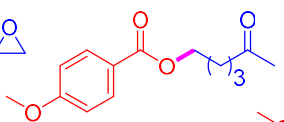

**4o**: 57%, rr = 10/1

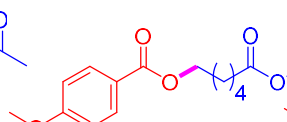

**4p**: 65%, rr > 10/1

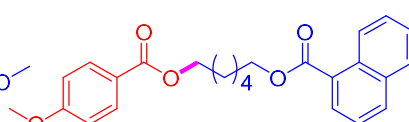

**4q**: 50%, rr = 3.9/1

### 2,2-disubstituted olefins

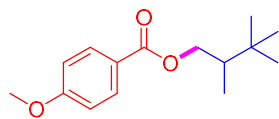

**4r**: 43%, rr > 10/1

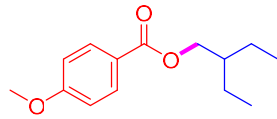

**4s**: 58%, rr > 10/1

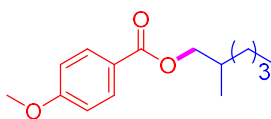

**4t**: 47%, rr > 10/1

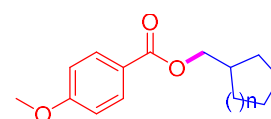

**4u** (n = 1): 53%, rr > 10/1

**4v** (n = 2): 66%, rr > 10/1

### General procedure B.

A dry 8 mL vial equipped with a magnetic stirring bar was charged with 4,5,6,7-tetrachloro-1,3-dioxoisindolin-2-yl 4-methoxybenzoate **1a** (44.0 mg, 0.10 mmol, 1.0 equiv), Ir(dFppy)<sub>3</sub> (0.8 mg, 1.00 μmol, 0.01 equiv), and dry DCM (5.0 mL). Then olefins (5.0 equiv) were added. The reaction mixture was protected by nitrogen, irradiated by blue LED (Kessil PR160L-427 nm) for 24 h or 36 h (the internal temperature of reaction solution is 40 – 45 °C). After reaction, the reaction mixture

was filtered by Celite and washed with DCM (2 mL). The combined solution was concentrated under vacuum. The residue was purified directly by silica-gel column chromatography to obtain products.

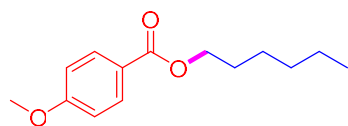

4b

According to the general procedure B, hex-1-ene (42.5 mg, 0.5 mmol, 5.0 equiv) was added to the reaction mixture. The mixture was irradiated by blue LED (Kessil PR160L-427 nm) for 36 h. After reaction and work up, target product (11.0 mg, 46%,  $rr = 4.5/1$ ) was obtained as a colorless oil.

**Eluting Solvents:** hexane/ethyl acetate = 15/1, v/v.

**TLC:** (hexane/ethyl acetate = 3/1, v/v)  $R_f = 0.8$ .

**$^1\text{H NMR}$**  (600 MHz,  $\text{CDCl}_3$ )  $\delta$  8.03 – 7.97 (m, 2H), 6.94 – 6.89 (m, 2H), 4.28 (t,  $J = 6.8$  Hz, 2H), 3.86 (s, 3H), 1.79 – 1.69 (m, 2H), 1.43 (q,  $J = 7.4$  Hz, 2H), 1.39 – 1.29 (m, 4H), 0.90 (m, 3H).  **$^{13}\text{C NMR}$**  (150 MHz,  $\text{CDCl}_3$ )  $\delta$  166.46, 163.20, 131.52, 122.96, 113.53, 64.84, 55.41, 31.47, 28.72, 25.72, 22.55, 14.02.

**ESI MS**  $m/z$ : 259.1  $[\text{M}+\text{Na}]^+$ .

The analytic data is consistent with those reported in the literature.<sup>11</sup>

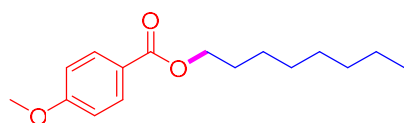

4c

According to the general procedure B, oct-1-ene (56.7 mg, 0.5 mmol, 5.0 equiv) was added to the reaction mixture. The mixture was irradiated by blue LED (Kessil PR160L-427 nm) for 36 h. After reaction and work up, target product (14.7 mg, 55%,  $rr = 3.8/1$ ) was obtained as a colorless oil.

**Eluting Solvents:** hexane/ethyl acetate = 15/1, v/v.

**TLC:** (hexane/ethyl acetate = 3/1, v/v)  $R_f = 0.8$ .

**$^1\text{H NMR}$**  (600 MHz,  $\text{CDCl}_3$ )  $\delta$  7.99 (dd,  $J = 9.0, 2.2$  Hz, 2H), 6.95 – 6.89 (m, 2H), 4.28 (t,  $J = 6.8$  Hz, 2H), 3.86 (s, 3H), 1.78 – 1.69 (m, 2H), 1.47 – 1.21 (m, 10H), 0.88 (t,  $J = 6.8$  Hz, 3H).  **$^{13}\text{C NMR}$**  (150 MHz,  $\text{CDCl}_3$ )  $\delta$  166.51, 163.24, 131.60, 122.99, 113.59, 71.38, 64.88, 55.40, 31.82, 29.23, 28.79, 26.08, 22.67, 14.10.

**ESI MS**  $m/z$ : 287.1  $[\text{M}+\text{Na}]^+$ .

The analytic data is consistent with those reported in the literature.<sup>12</sup>

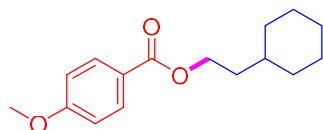

4d

According to the general procedure B, vinylcyclohexane (55.7 mg, 0.5 mmol, 5.0 equiv) was added to the reaction mixture. The mixture was irradiated by blue LED (Kessil PR160L-427 nm) for 36 h. After reaction and work up, target product (16.2 mg, 61%,  $rr > 10/1$ ) was obtained as a colorless oil.

**Eluting Solvents:** hexane/ethyl acetate = 15/1, v/v.

**TLC:** (hexane/ethyl acetate = 3/1, v/v)  $R_f = 0.8$ .

**$^1\text{H NMR}$**  (600 MHz,  $\text{CDCl}_3$ )  $\delta$  8.03 – 7.96 (m, 2H), 6.96 – 6.89 (m, 2H), 4.32 (t,  $J = 6.8$  Hz, 2H), 3.86 (s, 3H), 1.80 – 1.74 (m, 2H), 1.71 (dt,  $J = 12.6, 3.6$  Hz, 2H), 1.66 – 1.63 (m, 3H), 1.45 (ttt,  $J = 10.6, 7.0, 3.6$  Hz, 1H), 1.25 (qt,  $J = 12.4, 3.0$  Hz, 2H), 1.16 (qt,  $J = 12.5, 3.1$  Hz, 1H), 1.02 – 0.92 (m, 2H).  **$^{13}\text{C NMR}$**  (150 MHz,  $\text{CDCl}_3$ )  $\delta$  166.47, 163.20, 131.52, 122.97, 113.53, 62.99, 55.41, 36.11, 34.72, 33.20, 26.48, 26.21.

**ESI MS**  $m/z$ : 263.1  $[\text{M}+\text{H}]^+$ .

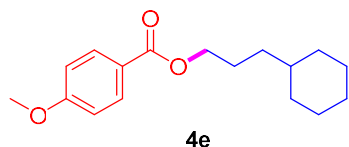

According to the general procedure B, allylcyclohexane (62.8 mg, 0.5 mmol, 5.0 equiv) was added to the reaction mixture. The mixture was irradiated by blue LED (Kessil PR160L-427 nm) for 36 h. After reaction and work up, target product (18.3 mg, 65%,  $rr = 6.2/1$ ) was obtained as a colorless oil.

**Eluting Solvents:** hexane/ethyl acetate = 15/1, v/v.

**TLC:** (hexane/ethyl acetate = 3/1, v/v)  $R_f = 0.8$ .

**$^1\text{H NMR}$**  (600 MHz,  $\text{CDCl}_3$ )  $\delta$  8.02 – 7.96 (m, 2H), 6.96 – 6.89 (m, 2H), 4.26 (t,  $J = 6.8$  Hz, 2H), 3.86 (s, 3H), 1.81 – 1.61 (m, 7H), 1.34 – 1.09 (m, 6H), 0.96 – 0.85 (m, 2H).  **$^{13}\text{C NMR}$**  (150 MHz,  $\text{CDCl}_3$ )  $\delta$  166.50, 163.24, 131.55, 122.99, 113.56, 65.21, 55.44, 37.36, 33.72, 33.33, 26.66, 26.37, 26.16.

**ESI MS**  $m/z$ : 277.2  $[\text{M}+\text{H}]^+$ .

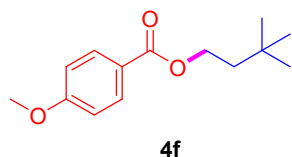

According to the general procedure B, 3,3-dimethylbut-1-ene (42.6 mg, 0.5 mmol, 5.0 equiv) was added to the reaction mixture. The mixture was irradiated by blue LED (Kessil PR160L-427 nm) for 36 h. After reaction and work up, target product (1.6 mg, 7%,  $rr = 2.0/1$ ) was obtained.

**Eluting Solvents:** hexane/ethyl acetate = 15/1, v/v.

**TLC:** (hexane/ethyl acetate = 3/1, v/v)  $R_f = 0.8$ .

**$^1\text{H NMR}$**  (600 MHz,  $\text{CDCl}_3$ )  $\delta$  7.99 (d,  $J = 8.8$  Hz, 2H), 6.91 (d,  $J = 8.8$  Hz, 2H), 4.35 (t,  $J = 7.2$  Hz, 2H), 3.86 (s, 3H), 1.69 (t,  $J = 7.2$  Hz, 2H), 0.99 (s, 9H).  **$^{13}\text{C NMR}$**  (150 MHz,  $\text{CDCl}_3$ )  $\delta$  166.53, 163.24, 131.54, 122.98, 113.57, 62.44, 55.44, 41.95, 40.09, 29.71.

**ESI MS**  $m/z$ : 237.1  $[\text{M}+\text{H}]^+$ .

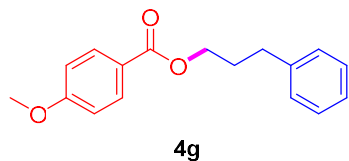

According to the general procedure B, allylbenzene (59.8 mg, 0.5 mmol, 5.0 equiv) was added to the reaction mixture. The mixture was irradiated by blue LED (Kessil PR160L-427 nm) for 36 h. After reaction and work up, target product (14.3 mg, 52%,  $rr = 4.7/1$ ) was obtained as a colorless oil.

**Eluting Solvents:** hexane/ethyl acetate = 12/1, v/v.

**TLC:** (hexane/ethyl acetate = 3/1, v/v)  $R_f = 0.6$ .

**$^1\text{H NMR}$**  (600 MHz,  $\text{CDCl}_3$ )  $\delta$  7.99 (d,  $J = 8.8\text{ Hz}$ , 2H), 7.30 – 7.27 (m, 2H), 7.25 – 7.18 (m, 3H), 6.92 (d,  $J = 8.8\text{ Hz}$ , 2H), 4.31 (t,  $J = 6.4\text{ Hz}$ , 2H), 3.86 (s, 3H), 2.81 – 2.76 (m, 2H), 2.13 – 2.05 (m, 2H).  **$^{13}\text{C NMR}$**  (150 MHz,  $\text{CDCl}_3$ )  $\delta$  166.40, 163.32, 141.30, 131.59, 128.49, 128.47, 126.02, 122.81, 113.60, 64.00, 55.46, 32.35, 30.39.

**ESI MS**  $m/z$ : 271.1  $[\text{M}+\text{H}]^+$ .

The analytic data is consistent with those reported in the literature.<sup>13</sup>

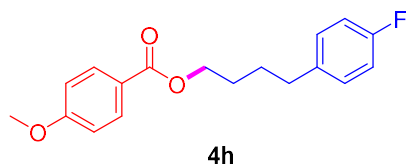

According to the general procedure B, 1-(but-3-en-1-yl)-4-fluorobenzene (76.0 mg, 0.5 mmol, 5.0 equiv) was added to the reaction mixture. The mixture was irradiated by blue LED (Kessil PR160L-427 nm) for 36 h. After reaction and work up, target product (20.6 mg, 67%,  $rr > 10/1$ ) was obtained as a colorless oil.

**Eluting Solvents:** hexane/ethyl acetate = 10/1, v/v.

**TLC:** (hexane/ethyl acetate = 3/1, v/v)  $R_f = 0.5$ .

**$^1\text{H NMR}$**  (600 MHz,  $\text{CDCl}_3$ )  $\delta$  8.02 – 7.94 (m, 2H), 7.16 – 7.11 (m, 2H), 7.00 – 6.94 (m, 2H), 6.94 – 6.89 (m, 2H), 4.30 (t,  $J = 6.2\text{ Hz}$ , 2H), 3.86 (s, 3H), 2.65 (t,  $J = 7.2\text{ Hz}$ , 2H), 1.80 – 1.71 (m, 4H).  **$^{13}\text{C NMR}$**  (150 MHz,  $\text{CDCl}_3$ )  $\delta$  166.44, 163.31, 161.27 (d,  $J = 241.5\text{ Hz}$ ), 137.65 (d,  $J = 3.3\text{ Hz}$ ), 131.57, 129.71 (d,  $J = 7.8\text{ Hz}$ ), 122.82, 115.08 (d,  $J = 20.6\text{ Hz}$ ), 113.59, 64.46, 55.45, 34.68, 28.30, 28.00.

**ESI MS**  $m/z$ : 303.1  $[\text{M}+\text{H}]^+$ .

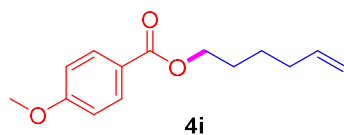

According to the general procedure B, hexa-1,5-diene (41.6 mg, 0.5 mmol, 5.0 equiv) was added to the reaction mixture. The mixture was irradiated by blue LED (Kessil PR160L-427 nm) for 36 h. After reaction and work up, target product (12.5 mg, 53%,  $rr = 4.0/1$ ) was obtained.

**Eluting Solvents:** hexane/ethyl acetate = 15/1, v/v.

**TLC:** (hexane/ethyl acetate = 3/1, v/v)  $R_f = 0.8$ .

**$^1\text{H NMR}$**  (600 MHz,  $\text{CDCl}_3$ )  $\delta$  8.02 – 7.96 (m, 2H), 6.96 – 6.88 (m, 2H), 5.82 (ddt,  $J = 16.9, 10.2, 6.8\text{ Hz}$ , 1H), 5.03 (dq,  $J = 17.2, 1.6\text{ Hz}$ , 1H), 4.97 (dq,  $J = 10.2, 1.4\text{ Hz}$ , 1H), 4.29 (t,  $J = 6.6\text{ Hz}$ , 2H), 3.86 (s, 3H), 2.16 – 2.09 (m, 2H), 1.77 (dt,  $J = 15.3, 6.7\text{ Hz}$ , 2H), 1.55 – 1.51 (m, 2H).  **$^{13}\text{C NMR}$**  (150 MHz,  $\text{CDCl}_3$ )  $\delta$  166.48, 163.27, 138.44, 131.57, 122.91, 114.86, 113.58, 64.63, 55.45, 33.37, 28.24, 25.35.

**ESI MS**  $m/z$ : 489.9  $[2\text{M}+\text{Na}]^+$ .

The analytic data is consistent with those reported in the literature.<sup>14</sup>

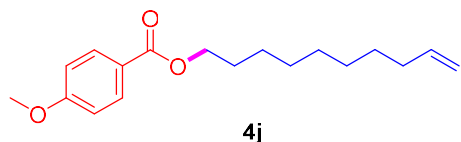

According to the general procedure B, deca-1,9-diene (70.0 mg, 0.5 mmol, 5.0 equiv) was added to the reaction mixture. The mixture was irradiated by blue LED (Kessil PR160L-427 nm) for 36 h. After reaction and work up, target product (15.7 mg, 53%, rr = 5.5/1) was obtained as a colorless oil.

**Eluting Solvents:** hexane/ethyl acetate = 15/1, v/v.

**TLC:** (hexane/ethyl acetate = 3/1, v/v)  $R_f$  = 0.8.

**$^1\text{H NMR}$**  (600 MHz,  $\text{CDCl}_3$ )  $\delta$  8.02 – 7.97 (m, 2H), 6.94 – 6.89 (m, 2H), 5.86 – 5.71 (m, 1H), 4.99 (dq,  $J$  = 17.2, 1.6 Hz, 1H), 4.93 (ddt,  $J$  = 10.2, 2.4, 1.2 Hz, 1H), 4.28 (t,  $J$  = 6.8 Hz, 2H), 3.86 (s, 3H), 2.07 – 1.99 (m, 2H), 1.78 – 1.67 (m, 2H), 1.47 – 1.27 (m, 10H).  **$^{13}\text{C NMR}$**  (150 MHz,  $\text{CDCl}_3$ )  $\delta$  166.50, 163.25, 139.21, 131.56, 122.98, 114.18, 113.56, 64.86, 55.45, 33.81, 29.39, 29.26, 29.06, 28.91, 28.78, 26.06.

**ESI MS**  $m/z$ : 291.1  $[\text{M}+\text{H}]^+$ .

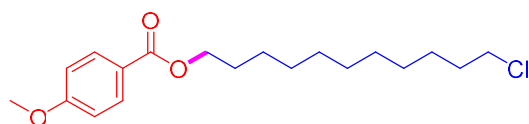

4k

According to the general procedure B, 11-chloroundec-1-ene (95.5 mg, 0.5 mmol, 5.0 equiv) was added to the reaction mixture. The mixture was irradiated by blue LED (Kessil PR160L-427 nm) for 36 h. After reaction and work up, target product (17.2 mg, 50%, rr = 3.9/1) was obtained as a colorless oil.

**Eluting Solvents:** hexane/ethyl acetate = 15/1, v/v.

**TLC:** (hexane/ethyl acetate = 3/1, v/v)  $R_f$  = 0.8.

**$^1\text{H NMR}$**  (600 MHz,  $\text{CDCl}_3$ )  $\delta$  8.03 – 7.96 (m, 2H), 6.96 – 6.89 (m, 2H), 4.28 (t,  $J$  = 6.7 Hz, 2H), 3.86 (s, 3H), 3.53 (t,  $J$  = 6.8 Hz, 2H), 1.80 – 1.69 (m, 4H), 1.46 – 1.37 (m, 4H), 1.37 – 1.24 (m, 10H).  **$^{13}\text{C NMR}$**  (150 MHz,  $\text{CDCl}_3$ )  $\delta$  166.50, 163.25, 131.55, 122.98, 113.56, 71.31, 64.85, 55.45, 45.24, 36.10, 32.66, 29.46, 28.90, 26.89, 26.06, 25.43, 20.17.

**ESI MS**  $m/z$ : 341.1  $[\text{M}+\text{H}]^+$ .

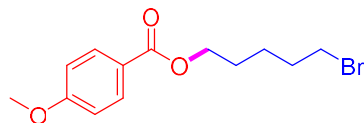

4l

According to the general procedure B, 5-bromopent-1-ene (75.4 mg, 0.5 mmol, 5.0 equiv) was added to the reaction mixture. The mixture was irradiated by blue LED (Kessil PR160L-427 nm) for 36 h. After reaction and work up, target product (16.3 mg, 54%, rr = 5.4/1) was obtained as a colorless oil.

**Eluting Solvents:** hexane/ethyl acetate = 15/1, v/v.

**TLC:** (hexane/ethyl acetate = 3/1, v/v)  $R_f$  = 0.7.

**$^1\text{H NMR}$**  (600 MHz,  $\text{CDCl}_3$ )  $\delta$  8.03 – 7.96 (m, 2H), 6.92 (d,  $J$  = 8.8 Hz, 2H), 4.30 (t,  $J$  = 6.4 Hz, 2H), 3.86 (s, 3H), 3.44 (td,  $J$  = 6.8, 2.8 Hz, 2H), 1.94 (dt,  $J$  = 14.8, 6.8 Hz, 2H), 1.86 – 1.75 (m, 2H), 1.64 – 1.58 (m, 2H).  **$^{13}\text{C NMR}$**  (150 MHz,  $\text{CDCl}_3$ )  $\delta$  166.41, 163.33, 131.58, 122.77, 113.61, 64.35, 55.46, 33.56, 32.35, 27.98, 24.77.

**ESI MS**  $m/z$ : 301.0, 303.1  $[\text{M}+\text{H}]^+$ .

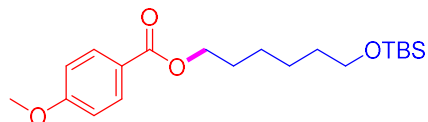

4m

According to the general procedure B, tert-butyl(hex-5-en-1-yloxy)dimethylsilane (108.0 mg, 0.5 mmol, 5.0 equiv) was added to the reaction mixture. The mixture was irradiated by blue LED (Kessil PR160L-427 nm) for 36 h. After reaction and work up, target product (16.3 mg, 44%, rr = 3.6/1) was obtained.

**Eluting Solvents:** hexane/ethyl acetate = 15/1, v/v.

**TLC:** (hexane/ethyl acetate = 3/1, v/v)  $R_f$  = 0.8.

**$^1\text{H NMR}$**  (600 MHz,  $\text{CDCl}_3$ )  $\delta$  7.99 (d,  $J$  = 8.8 Hz, 2H), 6.94 – 6.88 (m, 2H), 4.28 (t,  $J$  = 6.8 Hz, 2H), 3.86 (s, 3H), 3.61 (t,  $J$  = 6.5 Hz, 2H), 1.75 (dq,  $J$  = 13.6, 6.9 Hz, 2H), 1.58 – 1.50 (m, 2H), 1.50 – 1.35 (m, 4H), 0.88 (d,  $J$  = 11.2 Hz, 9H), -0.04 (d,  $J$  = 8.2 Hz, 6H).  **$^{13}\text{C NMR}$**  (150 MHz,  $\text{CDCl}_3$ )  $\delta$  166.48, 163.25, 131.56, 122.96, 113.56, 64.78, 63.13, 55.44, 32.75, 28.82, 26.00, 25.96, 25.93, 25.56, -5.25.

**ESI MS**  $m/z$ : 367.2  $[\text{M}+\text{H}]^+$ .

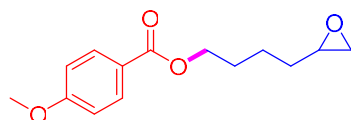

4n

According to the general procedure B, 2-(but-3-en-1-yl)oxirane (49.6 mg, 0.5 mmol, 5.0 equiv) was added to the reaction mixture. The mixture was irradiated by blue LED (Kessil PR160L-427 nm) for 36 h. After reaction and work up, target product (15.5 mg, 61%, rr = 3.6/1) was obtained as a colorless oil.

**Eluting Solvents:** hexane/ethyl acetate = 10/1, v/v.

**TLC:** (hexane/ethyl acetate = 3/1, v/v)  $R_f$  = 0.6.

**$^1\text{H NMR}$**  (600 MHz,  $\text{CDCl}_3$ )  $\delta$  8.03 – 7.96 (m, 2H), 6.94 – 6.89 (m, 2H), 4.30 (t,  $J$  = 6.4 Hz, 2H), 3.86 (s, 3H), 2.98 – 2.91 (m, 1H), 2.77 (dd,  $J$  = 5.0, 3.8 Hz, 1H), 2.51 – 2.46 (m, 1H), 1.82 (p,  $J$  = 6.8 Hz, 2H), 1.70 – 1.54 (m, 4H).  **$^{13}\text{C NMR}$**  (150 MHz,  $\text{CDCl}_3$ )  $\delta$  166.39, 163.28, 131.54, 122.75, 113.56, 64.43, 55.42, 52.13, 47.03, 32.11, 28.58, 22.66.

**ESI MS**  $m/z$ : 251.1  $[\text{M}+\text{H}]^+$ .

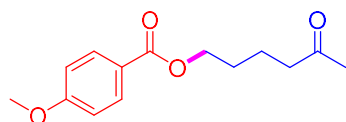

4o

According to the general procedure B, hex-5-en-2-one (50.0 mg, 0.5 mmol, 5.0 equiv) was added to the reaction mixture. The mixture was irradiated by blue LED (Kessil PR160L-427 nm) for 36 h. After reaction and work up, target product (14.5 mg, 57%, rr = 10/1) was obtained.

**Eluting Solvents:** hexane/ethyl acetate = 15/1, v/v.

**TLC:** (hexane/ethyl acetate = 3/1, v/v)  $R_f$  = 0.8.

**$^1\text{H NMR}$**  (600 MHz,  $\text{CDCl}_3$ )  $\delta$  8.03 – 7.95 (m, 2H), 6.96 – 6.89 (m, 2H), 4.29 (t,  $J$  = 6.2 Hz, 2H), 3.86 (s, 3H), 2.51 (t,  $J$  = 6.8 Hz, 2H), 2.15 (s, 3H), 1.75 (tdt,  $J$  = 10.3, 5.3, 2.4 Hz, 4H).  **$^{13}\text{C NMR}$**  (150 MHz,  $\text{CDCl}_3$ )  $\delta$  208.59, 166.41, 163.33, 131.59, 122.74, 113.60, 64.24, 55.45, 43.10, 29.99, 28.22, 20.27.

**ESI MS**  $m/z$ : 251.1  $[\text{M}+\text{H}]^+$ .



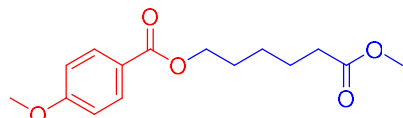

4p

According to the general procedure B, methyl hex-5-enoate (64.8 mg, 0.5 mmol, 5.0 equiv) was added to the reaction mixture. The mixture was irradiated by blue LED (Kessil PR160L-427 nm) for 36 h. After reaction and work up, target product (18.3 mg, 65%, rr > 10/1) was obtained as a oil.

**Eluting Solvents:** hexane/ethyl acetate = 10/1, v/v.

**TLC:** (hexane/ethyl acetate = 3/1, v/v)  $R_f$  = 0.6.

**$^1\text{H NMR}$**  (600 MHz,  $\text{CDCl}_3$ )  $\delta$  8.02 – 7.96 (m, 2H), 6.94 – 6.89 (m, 2H), 4.28 (t,  $J$  = 6.6 Hz, 2H), 3.86 (s, 3H), 3.67 (s, 3H), 2.35 (t,  $J$  = 7.6 Hz, 2H), 1.81 – 1.74 (m, 2H), 1.71 (p,  $J$  = 7.6 Hz, 2H), 1.52 – 1.42 (m, 2H).  **$^{13}\text{C NMR}$**  (150 MHz,  $\text{CDCl}_3$ )  $\delta$  174.02, 166.39, 163.26, 131.54, 122.80, 113.55, 64.43, 55.42, 51.53, 33.93, 28.46, 25.64, 24.60.

**ESI MS**  $m/z$ : 281.1  $[\text{M}+\text{H}]^+$ .

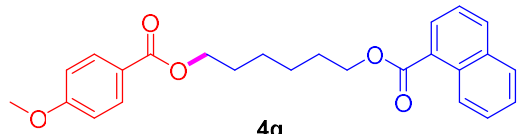

4q

According to the general procedure B, hex-5-en-1-yl 1-naphthoate (128.6 mg, 0.5 mmol, 5.0 equiv) was added to the reaction mixture. The mixture was irradiated by blue LED (Kessil PR160L-427 nm) for 36 h. After reaction and work up, target product (20.5 mg, 50%, rr = 3.9/1) was obtained as a solid.

**Eluting Solvents:** hexane/DCM = 1/2, v/v.

**TLC:** (hexane/DCM = 1/1, v/v)  $R_f$  = 0.2.

**$^1\text{H NMR}$**  (600 MHz,  $\text{CDCl}_3$ )  $\delta$  8.93 – 8.87 (m, 1H), 8.18 – 8.12 (m, 1H), 8.04 – 7.95 (m, 3H), 7.91 – 7.86 (m, 1H), 7.65 – 7.56 (m, 1H), 7.56 – 7.42 (m, 2H), 6.92 – 6.84 (m, 2H), 4.42 (td,  $J$  = 6.6, 4.8 Hz, 2H), 4.31 (t,  $J$  = 6.6 Hz, 2H), 3.84 (s, 3H), 1.91 – 1.77 (m, 4H), 1.62 – 1.53 (m, 4H).  **$^{13}\text{C NMR}$**  (150 MHz,  $\text{CDCl}_3$ )  $\delta$  167.70, 166.47, 163.28, 133.85, 133.28, 131.56, 131.35, 130.09, 128.55, 127.73, 127.41, 126.20, 125.82, 124.53, 122.86, 113.58, 65.06, 64.63, 55.43, 28.74, 28.74, 25.94, 25.88.

**ESI MS**  $m/z$ : 407.1  $[\text{M}+\text{H}]^+$ .

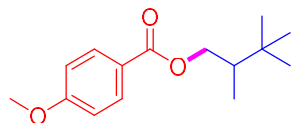

4r

According to the general procedure B, 2,3,3-trimethylbut-1-ene (49.7 mg, 0.5 mmol, 5.0 equiv) was added to the reaction mixture. The mixture was irradiated by blue LED (Kessil PR160L-427 nm) for 36 h. After reaction and work up, target product (11.0 mg, 43%, rr > 10/1) was obtained.

**Eluting Solvents:** hexane/ethyl acetate = 15/1, v/v.

**TLC:** (hexane/ethyl acetate = 3/1, v/v)  $R_f$  = 0.9.

**$^1\text{H NMR}$**  (600 MHz,  $\text{CDCl}_3$ )  $\delta$  8.02 – 7.97 (m, 2H), 6.95 – 6.89 (m, 2H), 4.44 (dd,  $J$  = 10.8, 4.2 Hz, 1H), 4.04 (dd,  $J$  = 10.8, 8.4 Hz, 1H), 3.86 (s, 3H), 1.72 (dq,  $J$  = 8.4, 6.8, 4.2 Hz, 1H), 1.01 (d,

$J = 6.8$  Hz, 3H), 0.96 (s, 9H).  $^{13}\text{C}$  NMR (150 MHz,  $\text{CDCl}_3$ )  $\delta$  166.62, 163.24, 131.53, 123.04, 113.59, 67.42, 55.45, 42.26, 32.26, 27.70, 12.89.

ESI MS  $m/z$ : 251.1  $[\text{M}+\text{H}]^+$ .

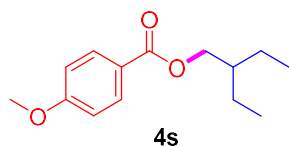

According to the general procedure B, 3-methylenepentane (42.6 mg, 0.5 mmol, 5.0 equiv) was added to the reaction mixture. The mixture was irradiated by blue LED (Kessil PR160L-427 nm) for 36 h. After reaction and work up, target product (14.0 mg, 58%,  $rr > 10/1$ ) was obtained as a colorless oil.

**Eluting Solvents:** hexane/DCM = 3/2, v/v.

**TLC:** (hexane/DCM = 1/1, v/v)  $R_f = 0.7$ .

$^1\text{H}$  NMR (600 MHz,  $\text{CDCl}_3$ )  $\delta$  8.03 – 7.97 (m, 2H), 6.94 – 6.89 (m, 2H), 4.22 (d,  $J = 5.8$  Hz, 2H), 3.86 (s, 3H), 1.65 (p,  $J = 6.2$  Hz, 1H), 1.45 (pd,  $J = 7.6, 1.6$  Hz, 4H), 0.94 (t,  $J = 7.6$  Hz, 6H).  $^{13}\text{C}$  NMR (150 MHz,  $\text{CDCl}_3$ )  $\delta$  166.53, 163.21, 131.51, 122.99, 113.55, 66.64, 55.41, 40.51, 23.51, 11.13.

ESI MS  $m/z$ : 237.1  $[\text{M}+\text{H}]^+$ .

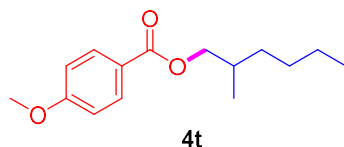

According to the general procedure B, 2-methylhex-1-ene (50.0 mg, 0.5 mmol, 5.0 equiv) was added to the reaction mixture. The mixture was irradiated by blue LED (Kessil PR160L-427 nm) for 36 h. After reaction and work up, target product (12.0 mg, 47%,  $rr > 10/1$ ) was obtained as a colorless oil.

**Eluting Solvents:** hexane/ ethyl acetate = 20/1, v/v.

**TLC:** (hexane/ ethyl acetate = 3/1, v/v)  $R_f = 0.9$ .

$^1\text{H}$  NMR (600 MHz,  $\text{CDCl}_3$ )  $\delta$  8.04 – 7.97 (m, 2H), 6.97 – 6.89 (m, 2H), 4.17 (dd,  $J = 10.8, 5.8$  Hz, 1H), 4.07 (dd,  $J = 10.8, 6.8$  Hz, 1H), 3.86 (s, 3H), 1.95 – 1.87 (m, 1H), 1.47 – 1.44 (m, 1H), 1.42 – 1.27 (m, 4H), 1.26 – 1.20 (m, 1H), 1.01 (d,  $J = 6.8$  Hz, 3H), 0.95 – 0.87 (m, 3H).  $^{13}\text{C}$  NMR  $\delta$  166.50, 163.25, 131.54, 123.01, 113.58, 69.62, 55.45, 33.19, 32.73, 29.11, 22.92, 17.09, 14.10.

ESI MS  $m/z$ : 251.0  $[\text{M}+\text{H}]^+$ .

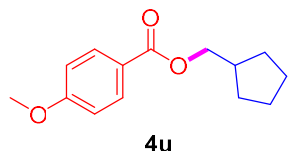

According to the general procedure B, methylenecyclopentane (41.5 mg, 0.5 mmol, 5.0 equiv) was added to the reaction mixture. The mixture was irradiated by blue LED (Kessil PR160L-427 nm) for 36 h. After reaction and work up, target product (12.6 mg, 53%,  $rr > 10/1$ ) was obtained as a colorless oil.

**Eluting Solvents:** hexane/ ethyl acetate = 15/1, v/v.

**TLC:** (hexane/ ethyl acetate = 3/1, v/v)  $R_f = 0.8$ .

**<sup>1</sup>H NMR** (600 MHz, CDCl<sub>3</sub>) δ 8.12 – 7.80 (m, 2H), 6.96 – 6.87 (m, 2H), 4.18 (d, *J* = 7.2 Hz, 2H), 3.86 (s, 3H), 2.36 – 2.29 (m, 1H), 1.86 – 1.76 (m, 2H), 1.71 – 1.53 (m, 4H), 1.41 – 1.31 (m, 2H). **<sup>13</sup>C NMR** (150 MHz, CDCl<sub>3</sub>) δ 166.55, 163.25, 131.57, 123.01, 113.57, 68.62, 55.44, 38.72, 29.43, 25.40.

**ESI MS** *m/z*: 235.1 [M+H]<sup>+</sup>.

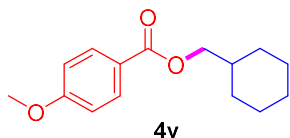

According to the general procedure B, methylenecyclohexane (48.6 mg, 0.5 mmol, 5.0 equiv) was added to the reaction mixture. The mixture was irradiated by blue LED (Kessil PR160L-427 nm) for 36 h. After reaction and work up, target product (16.6 mg, 66%, *rr* > 10/1) was obtained as a colorless oil.

**Eluting Solvents:** hexane/ ethyl acetate = 15/1, v/v.

**TLC:** (hexane/ ethyl acetate = 3/1, v/v) *R<sub>f</sub>* = 0.8.

**<sup>1</sup>H NMR** (600 MHz, CDCl<sub>3</sub>) δ 8.02 – 7.95 (m, 2H), 6.94 – 6.89 (m, 2H), 4.10 (d, *J* = 6.4 Hz, 2H), 3.86 (s, 3H), 1.83 – 1.67 (m, 6H), 1.32 – 1.13 (m, 3H), 1.07 (td, *J* = 12.2, 3.6 Hz, 2H). **<sup>13</sup>C NMR** (150 MHz, CDCl<sub>3</sub>) δ 166.49, 163.24, 131.57, 123.01, 113.57, 69.82, 55.46, 37.33, 29.81, 26.42, 25.76.

**ESI MS** *m/z*: 249.1 [M+H]<sup>+</sup>.

## Scope of Hydroesterification (internal olefins)

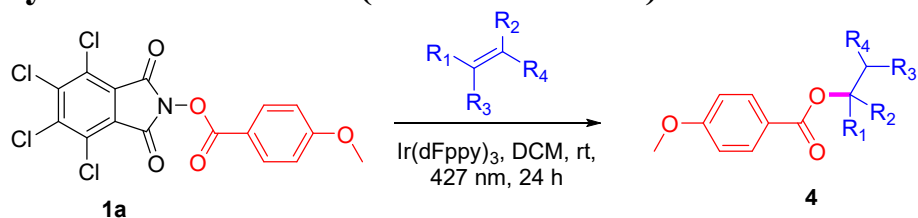

internal olefins

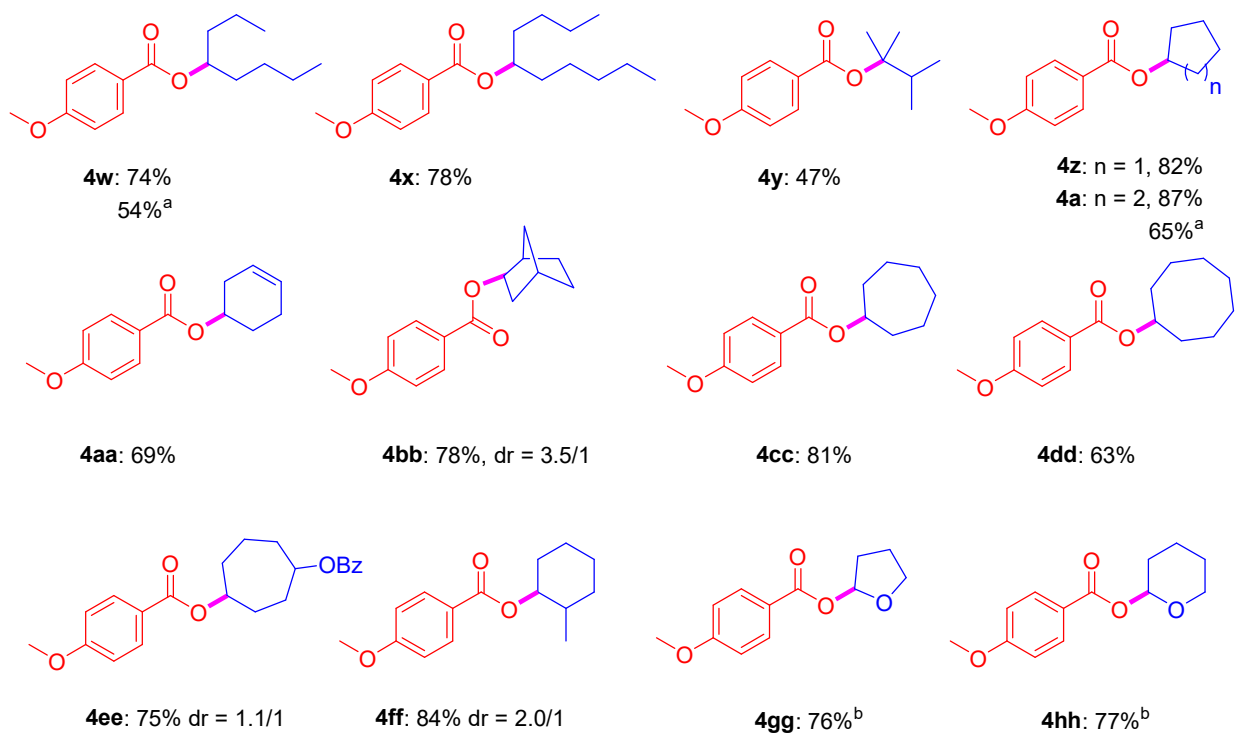

<sup>a</sup>1 mmol of **1a**. <sup>b</sup>The phthalimide ester substrate was 1,3-dioxoisindolin-2-yl 4-methoxybenzoate.

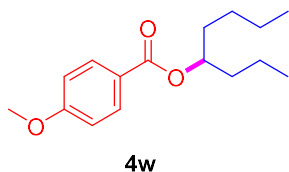

According to the general procedure B, (E)-oct-4-ene (56.8 mg, 0.5 mmol, 5.0 equiv) was added to the reaction mixture. The mixture was irradiated by blue LED (Kessil PR160L-427 nm) for 24 h. After reaction and work up, target product (19.8 mg, 74%) was obtained as a colorless oil.

**Eluting Solvents:** hexane/ ethyl acetate = 15/1, v/v.

**TLC:** (hexane/ ethyl acetate = 3/1, v/v)  $R_f$  = 0.8.

**<sup>1</sup>H NMR** (600 MHz,  $\text{CDCl}_3$ )  $\delta$  8.03 – 7.97 (m, 2H), 6.96 – 6.89 (m, 2H), 5.11 (tt,  $J$  = 7.6, 5.0 Hz, 1H), 3.86 (s, 3H), 1.71 – 1.57 (m, 4H), 1.47 – 1.27 (m, 6H), 0.98 – 0.85 (m, 6H). **<sup>13</sup>C NMR** (150 MHz,  $\text{CDCl}_3$ )  $\delta$  166.19, 163.17, 131.55, 123.33, 113.53, 74.45, 55.45, 36.48, 34.03, 27.55, 22.69, 18.67, 14.09, 14.05.

**ESI MS**  $m/z$ : 265.1  $[\text{M}+\text{H}]^+$ .

### 1 mmol scale reaction

A 100 mL dry flask equipped with a magnetic stirring bar was charged with 4,5,6,7-tetrachloro-1,3-dioxoisindolin-2-yl 4-methoxybenzoate **1a** (440 mg, 1.0 mmol, 1.0 equiv), Ir(dFppy)<sub>3</sub> (7.8 mg, 1.00 μmol, 0.01 equiv), and dry DCM (80 mL). Then (E)-oct-4-ene (567 mg, 5 mmol, 5.0 equiv) was added. The reaction mixture was protected by nitrogen, irradiated by blue LED (Kessil PR160L-427 nm) for 60 h (the internal temperature of reaction solution was about 40 °C). After reaction, the mixture was filtered by Celite and washed with DCM (10 mL). The combined solution was concentrated under vacuum. The residue was purified directly by silica-gel column chromatography (eluting with hexane/ ethyl acetate = 15/1, v/v.) to obtain product (146 mg, 54%) as a yellow oil.

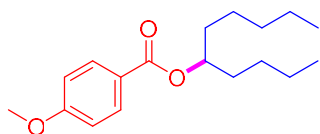

**4x**

According to the general procedure B, (E)-dec-5-ene (71.0 mg, 0.5 mmol, 5.0 equiv) was added to the reaction mixture. The mixture was irradiated by blue LED (Kessil PR160L-427 nm) for 24 h. After reaction and work up, target product (23.0 mg, 78%) was obtained as a colorless oil.

**Eluting Solvents:** hexane/ ethyl acetate = 15/1, v/v.

**TLC:** (hexane/ ethyl acetate = 3/1, v/v) R<sub>f</sub> = 0.8.

**<sup>1</sup>H NMR** (600 MHz, CDCl<sub>3</sub>) δ 8.03 – 7.97 (m, 2H), 6.96 – 6.89 (m, 2H), 5.09 (tt, *J* = 7.3, 5.1 Hz, 1H), 3.86 (s, 3H), 1.71 – 1.57 (m, 4H), 1.45 – 1.16 (m, 10H), 0.96 – 0.83 (m, 6H). **<sup>13</sup>C NMR** (150 MHz, CDCl<sub>3</sub>) δ 166.19, 163.17, 131.54, 123.35, 113.53, 74.70, 55.45, 34.25, 33.99, 31.80, 27.56, 25.05, 22.69, 22.57, 14.05, 14.05.

**ESI MS** *m/z*: 293.2 [M+H]<sup>+</sup>.

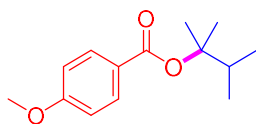

**4y**

According to the general procedure B, 2,3-dimethylbut-2-ene (42.6 mg, 0.5 mmol, 5.0 equiv) was added to the reaction mixture. The mixture was irradiated by blue LED (Kessil PR160L-427 nm) for 24 h. After reaction and work up, target product (11.3 mg, 47%) was obtained as a colorless oil.

**Eluting Solvents:** hexane/ ethyl acetate = 15/1, v/v.

**TLC:** (hexane/ ethyl acetate = 3/1, v/v) R<sub>f</sub> = 0.8.

**<sup>1</sup>H NMR** (600 MHz, CDCl<sub>3</sub>) δ 7.98 – 7.90 (m, 2H), 6.94 – 6.87 (m, 2H), 3.85 (s, 3H), 2.37 – 2.27 (m, 1H), 1.54 (s, 6H), 0.98 (d, *J* = 6.8 Hz, 6H). **<sup>13</sup>C NMR** (150 MHz, CDCl<sub>3</sub>) δ 165.54, 162.93, 131.34, 124.66, 113.42, 85.67, 55.42, 36.75, 23.00, 17.45.

**ESI MS** *m/z*: 259.2 [M+Na]<sup>+</sup>.

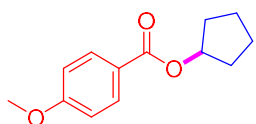

**4z**

According to the general procedure B, cyclopentene (34.5 mg, 0.5 mmol, 5.0 equiv) was added to the reaction mixture. The mixture was irradiated by blue LED (Kessil PR160L-427 nm) for 24 h. After reaction and work up, target product (18.2 mg, 82%) was obtained as a colorless oil.

**Eluting Solvents:** hexane/ ethyl acetate = 15/1, v/v.

**TLC:** (hexane/ ethyl acetate = 3/1, v/v)  $R_f = 0.8$ .

**$^1\text{H NMR}$**  (600 MHz,  $\text{CDCl}_3$ )  $\delta$  8.01 – 7.94 (m, 2H), 6.93 – 6.88 (m, 2H), 5.38 (tt,  $J = 6.2, 2.8$  Hz, 1H), 3.86 (s, 3H), 1.99 – 1.89 (m, 2H), 1.86 – 1.76 (m, 4H), 1.69 – 1.61 (m, 2H).  **$^{13}\text{C NMR}$**  (150 MHz,  $\text{CDCl}_3$ )  $\delta$  166.18, 163.16, 131.50, 123.37, 113.49, 77.33, 55.44, 32.82, 23.85.

**ESI MS**  $m/z$ : 221.1  $[\text{M}+\text{H}]^+$ .

The analytic data is consistent with those reported in the literature.<sup>15</sup>

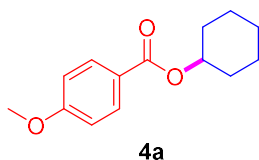

According to the general procedure B, cyclohexene (41.5 mg, 0.5 mmol, 5.0 equiv) was added to the reaction mixture. The mixture was irradiated by blue LED (Kessil PR160L-427 nm) for 24 h. After reaction and work up, target product (20.6 mg, 87%) was obtained as a colorless oil.

**TLC:** (hexane/ethyl acetate = 3/1, v/v)  $R_f = 0.8$ .

**Purification:** eluting with hexane/ ethyl acetate = 15/1, v/v.

**Data** refer to former data for this product in the optimization section above.

### 1 mmol scale reaction

The procedure described for product **4w** was followed. The crude reaction residue was purified directly by silica-gel column chromatography (eluting with hexane/ ethyl acetate = 15/1, v/v.) to obtain product (154 mg, 65%) as a yellow solid.

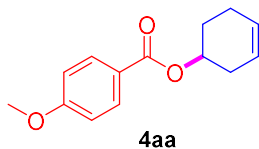

According to the general procedure B, cyclohexa-1,4-diene (40.5 mg, 0.5 mmol, 5.0 equiv) was added to the reaction mixture. The mixture was irradiated by blue LED (Kessil PR160L-427 nm) for 24 h. After reaction and work up, target product (16.2 mg, 69%) was obtained as a colorless oil.

**Eluting Solvents:** hexane/ ethyl acetate = 15/1, v/v.

**TLC:** (hexane/ ethyl acetate = 3/1, v/v)  $R_f = 0.7$ .

**$^1\text{H NMR}$**  (600 MHz,  $\text{CDCl}_3$ )  $\delta$  8.03 – 7.97 (m, 2H), 6.94 – 6.89 (m, 2H), 5.73 (ddt,  $J = 9.8, 3.6, 1.6$  Hz, 1H), 5.66 – 5.60 (m, 1H), 5.25 (dddd,  $J = 9.6, 6.8, 5.2, 3.2$  Hz, 1H), 3.86 (s, 3H), 2.52 – 2.45 (m, 1H), 2.30 – 2.14 (m, 3H), 2.04 – 1.94 (m, 1H), 1.91 – 1.82 (m, 1H).  **$^{13}\text{C NMR}$**  (150 MHz,  $\text{CDCl}_3$ )  $\delta$  165.93, 163.23, 131.58, 126.81, 123.78, 123.27, 113.53, 69.86, 55.45, 30.87, 27.38, 23.23.

**ESI MS**  $m/z$ : 233.1  $[\text{M}+\text{H}]^+$ .

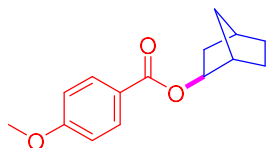

4bb

According to the general procedure B, bicyclo[2.2.1]hept-2-ene (47.6 mg, 0.5 mmol, 5.0 equiv) was added to the reaction mixture. The mixture was irradiated by blue LED (Kessil PR160L-427 nm) for 24 h. After reaction and work up, target product (19.4 mg, 78%, dr = 3.5/1) was obtained as a colorless oil.

**Eluting Solvents:** hexane/ ethyl acetate = 12/1, v/v.

**TLC:** (hexane/ ethyl acetate = 3/1, v/v)  $R_f$  = 0.8.

**$^1\text{H NMR}$**  (600 MHz,  $\text{CDCl}_3$ )  $\delta$  8.05 – 7.88 (m, 2H), 6.99 – 6.79 (m, 2H), 4.82 (ddt,  $J$  = 7.2, 2.4, 1.2 Hz, 1H), 3.86 (s, 3H), 2.43 (d,  $J$  = 5.0 Hz, 1H), 2.33 (t,  $J$  = 4.4 Hz, 1H), 1.82 (ddd,  $J$  = 13.6, 7.0, 2.5 Hz, 1H), 1.64 (dp,  $J$  = 9.8, 1.9 Hz, 1H), 1.60 – 1.53 (m, 2H), 1.50 – 1.44 (m, 1H), 1.24 – 1.18 (m, 2H), 1.16 – 1.11 (m, 1H).  **$^{13}\text{C NMR}$**  (150 MHz,  $\text{CDCl}_3$ )  $\delta$  166.01, 163.17, 131.48, 123.34, 113.50, 77.81, 55.44, 41.59, 39.71, 35.45, 35.45, 28.24, 24.32.

**ESI MS**  $m/z$ : 267.1  $[\text{M}+\text{Na}]^+$ .

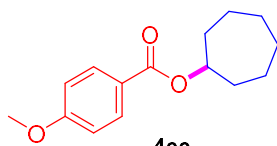

4cc

According to the general procedure B, cycloheptene (48.5 mg, 0.5 mmol, 5.0 equiv) was added to the reaction mixture. The mixture was irradiated by blue LED (Kessil PR160L-427 nm) for 24 h. After reaction and work up, target product (20.3 mg, 81%) was obtained as a colorless oil.

**Eluting Solvents:** hexane/ ethyl acetate = 15/1, v/v.

**TLC:** (hexane/ ethyl acetate = 3/1, v/v)  $R_f$  = 0.7.

**$^1\text{H NMR}$**  (600 MHz,  $\text{CDCl}_3$ )  $\delta$  8.02 – 7.97 (m, 2H), 6.94 – 6.88 (m, 2H), 5.16 (tt,  $J$  = 8.4, 4.4 Hz, 1H), 3.86 (s, 3H), 2.04 – 1.95 (m, 2H), 1.83 – 1.78 (m, 2H), 1.76 – 1.68 (m, 2H), 1.64 – 1.58 (m, 4H), 1.55 – 1.48 (m, 2H).  **$^{13}\text{C NMR}$**  (150 MHz,  $\text{CDCl}_3$ )  $\delta$  165.71, 163.10, 131.48, 123.50, 113.46, 75.21, 55.40, 33.86, 28.32, 22.94.

**ESI MS**  $m/z$ : 271.1  $[\text{M}+\text{Na}]^+$ .

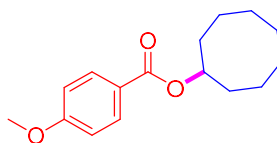

4dd

According to the general procedure B, (*Z*)-cyclooctene (55.7 mg, 0.5 mmol, 5.0 equiv) was added to the reaction mixture. The mixture was irradiated by blue LED (Kessil PR160L-427 nm) for 24 h. After reaction and work up, target product (16.8 mg, 63%) was obtained as a colorless oil.

**Eluting Solvents:** hexane/ ethyl acetate = 15/1, v/v.

**TLC:** (hexane/ ethyl acetate = 6/1, v/v)  $R_f$  = 0.7.

**$^1\text{H NMR}$**  (600 MHz,  $\text{CDCl}_3$ )  $\delta$  8.03 – 7.96 (m, 2H), 6.95 – 6.88 (m, 2H), 5.16 (tt,  $J$  = 8.2, 4.0 Hz, 1H), 3.86 (s, 3H), 1.96 – 1.82 (m, 4H), 1.82 – 1.72 (m, 2H), 1.69 – 1.48 (m, 8H).  **$^{13}\text{C NMR}$**  (150 MHz,  $\text{CDCl}_3$ )  $\delta$  165.74, 163.12, 131.50, 123.58, 113.49, 75.26, 55.44, 31.56, 27.20, 25.38, 22.96.

**ESI MS**  $m/z$ : 285.2  $[\text{M}+\text{Na}]^+$ .

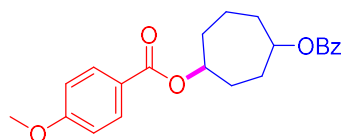

4ee

According to the general procedure B, cyclohept-4-en-1-yl benzoate (109.4 mg, 0.5 mmol, 5.0 equiv) was added to the reaction mixture. The mixture was irradiated by blue LED (Kessil PR160L-427 nm) for 24 h. After reaction and work up, target products (isomer A: 14.8 mg, 40%, isomer B: 13.2 mg, 35%, dr = 1.1/1) were obtained as white solid.

**Isomer A:**

**Eluting Solvents:** dichloromethane.

**TLC:** (hexane/ dichloromethane = 10/1, v/v)  $R_f = 0.3$ .

**$^1\text{H NMR}$**  (600 MHz,  $\text{CDCl}_3$ )  $\delta$  8.08 – 8.02 (m, 2H), 8.02 – 7.98 (m, 2H), 7.60 – 7.53 (m, 1H), 7.48 – 7.42 (m, 2H), 6.95 – 6.90 (m, 2H), 5.33 – 5.24 (m, 2H), 3.87 (s, 3H), 2.22 – 2.13 (m, 2H), 2.13 – 2.05 (m, 2H), 1.90 – 1.82 (m, 4H), 1.80 – 1.69 (m, 2H).  **$^{13}\text{C NMR}$**  (150 MHz,  $\text{CDCl}_3$ )  $\delta$  165.88, 165.63, 163.30, 132.87, 131.57, 130.75, 129.56, 128.37, 123.16, 113.59, 74.46, 74.00, 55.47, 34.04, 34.00, 28.04, 28.04, 18.49.

**ESI MS**  $m/z$ : 391.2  $[\text{M}+\text{Na}]^+$ .

**Isomer B:**

**Eluting Solvents:** dichloromethane.

**TLC:** (hexane/ dichloromethane = 10/1, v/v)  $R_f = 0.2$ .

**$^1\text{H NMR}$**  (600 MHz,  $\text{CDCl}_3$ )  $\delta$  8.11 – 8.04 (m, 2H), 8.04 – 7.94 (m, 2H), 7.59 – 7.52 (m, 1H), 7.49 – 7.41 (m, 2H), 6.96 – 6.89 (m, 2H), 5.29 – 5.19 (m, 2H), 3.86 (s, 3H), 2.17 – 2.06 (m, 4H), 1.99 – 1.84 (m, 5H), 1.57 (s, 3H), 1.57 – 1.47 (m, 1H).  **$^{13}\text{C NMR}$**  (150 MHz,  $\text{CDCl}_3$ )  $\delta$  165.88, 165.63, 163.28, 132.84, 131.57, 130.80, 129.57, 128.35, 123.21, 113.57, 74.40, 73.94, 55.46, 34.12, 34.07, 27.97, 27.94, 18.70.

**ESI MS**  $m/z$ : 391.2  $[\text{M}+\text{Na}]^+$ .

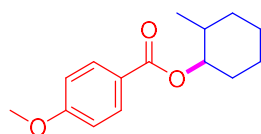

4ff

According to the general procedure B, 1-methylcyclohex-1-ene (48.5 mg, 0.5 mmol, 5.0 equiv) was added to the reaction mixture. The mixture was irradiated by blue LED (Kessil PR160L-427 nm) for 24 h. After reaction and work up, target product (21.0 mg, 84%, dr = 2.0/1) was obtained as a colorless oil.

**Eluting Solvents:** hexane/ ethyl acetate = 12/1, v/v.

**TLC:** (hexane/ ethyl acetate = 3/1, v/v)  $R_f = 0.8$ .

**$^1\text{H NMR}$**  (600 MHz,  $\text{CDCl}_3$ )  $\delta$  8.09 – 7.95 (m, 2H), 6.96 – 6.92 (m, 2H), 5.19 – 5.17 (m, 0.34 H), 4.65 (td,  $J = 10.2, 4.2$  Hz, 0.67H), 3.88 (s, 3H), 2.39 – 1.65 (m, 5H), 1.55 – 1.09 (m, 4H), 0.97 – 0.96 (m, 3H).  **$^{13}\text{C NMR}$**  (150 MHz,  $\text{CDCl}_3$ )  $\delta$  166.11, 165.96, 163.18, 163.18, 131.54, 131.51, 123.52, 123.35, 113.57, 113.52, 78.68, 73.96, 55.45, 55.43, 37.48, 36.84, 35.01, 33.54, 31.85, 29.70, 25.47, 25.38, 24.87, 24.78, 22.19, 21.10, 18.55, 17.64.

**ESI MS**  $m/z$ : 519.2  $[2\text{M}+\text{Na}]^+$ .



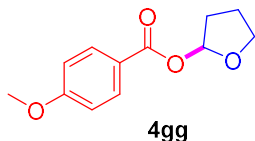

According to the general procedure B, 1,3-dioxoisindolin-2-yl 4-methoxybenzoate (30 mg, 0.1 mmol, 1 equiv), 2,3-dihydrofuran (35.5 mg, 0.5 mmol, 5.0 equiv) was added to the reaction mixture. The mixture was irradiated by blue LED (Kessil PR160L-427 nm) for 24 h. After reaction and work up, target product (17.0 mg, 76%) was obtained as a colorless oil.

**Eluting Solvents:** hexane/ ethyl acetate = 10/1, v/v.

**TLC:** (hexane/ ethyl acetate = 3/1, v/v)  $R_f$  = 0.6.

**$^1\text{H NMR}$**  (600 MHz,  $\text{CDCl}_3$ )  $\delta$  8.00 – 7.96 (m, 2H), 6.93 – 6.89 (m, 2H), 6.52 (d,  $J$  = 4.0 Hz, 1H), 4.13 (td,  $J$  = 8.0, 5.4 Hz, 1H), 3.99 (q,  $J$  = 7.6 Hz, 1H), 3.86 (s, 3H), 2.22 – 2.08 (m, 3H), 2.03 – 1.97 (m, 1H).  **$^{13}\text{C NMR}$**  (150 MHz,  $\text{CDCl}_3$ )  $\delta$  165.71, 163.43, 131.73, 122.77, 113.56, 99.39, 68.99, 55.46, 32.30, 23.02.

**ESI MS**  $m/z$ : 245.1  $[\text{M}+\text{Na}]^+$ .

The analytic data is consistent with those reported in the literature.<sup>16</sup>

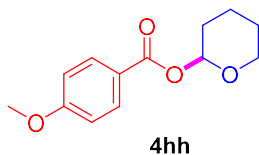

According to the general procedure B, 1,3-dioxoisindolin-2-yl 4-methoxybenzoate (30 mg, 0.1 mmol, 1 equiv), 3,4-dihydro-2H-pyran (42.5 mg, 0.5 mmol, 5.0 equiv) was added to the reaction mixture. The mixture was irradiated by blue LED (Kessil PR160L-427 nm) for 24 h. After reaction and work up, target product (18.3 mg, 77%) was obtained as a colorless oil.

**Eluting Solvents:** hexane/ ethyl acetate = 10/1, v/v.

**TLC:** (hexane/ ethyl acetate = 3/1, v/v)  $R_f$  = 0.6.

**$^1\text{H NMR}$**  (600 MHz,  $\text{CDCl}_3$ )  $\delta$  8.08 – 7.99 (m, 2H), 6.99 – 6.91 (m, 2H), 6.21 (t,  $J$  = 3.2 Hz, 1H), 3.99 (ddd,  $J$  = 11.6, 10.0, 3.0 Hz, 1H), 3.87 (s, 3H), 3.75 (dtd,  $J$  = 11.4, 4.2, 1.6 Hz, 1H), 2.01 – 1.79 (m, 3H), 1.78 – 1.69 (m, 2H), 1.68 – 1.60 (m, 1H).  **$^{13}\text{C NMR}$**  (150 MHz,  $\text{CDCl}_3$ )  $\delta$  164.94, 163.52, 131.84, 122.68, 113.65, 92.83, 63.27, 55.47, 29.37, 25.08, 18.76.

**ESI MS**  $m/z$ : 495.2  $[2\text{M}+\text{Na}]^+$ .

## Difunctionalization of olefins

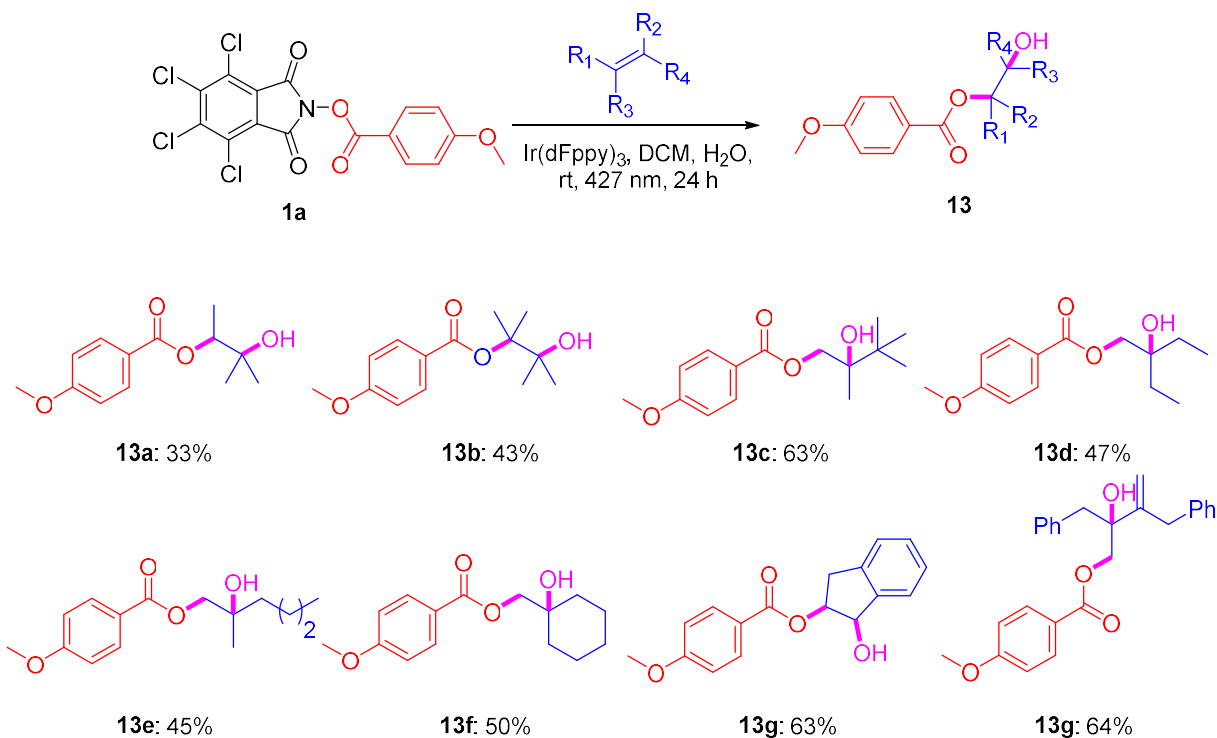

### General procedure C.

A 8 dry mL vial equipped with a magnetic stirring bar was charged with 4,5,6,7-tetrachloro-1,3-dioxoisindolin-2-yl 4-methoxybenzoate **1A** (44.0 mg, 0.10 mmol, 1.0 equiv), Ir(dFppy)<sub>3</sub> (0.8 mg, 1.00 μmol, 0.01 equiv), and DCM (5.0 mL). Then olefins (5.0 equiv) and H<sub>2</sub>O (18.0 mg, 1 mmol, 10.0 equiv) were added. The reaction mixture was protected by nitrogen, irradiated by blue LED (Kessil PR160L-427 nm) for 24 h (the internal temperature of reaction solution is 40 – 45 °C). After reaction, the reaction mixture was filtered by Celite and washed with DCM (2 mL). The combined solution was concentrated under vacuum. The residue was purified directly by silica-gel column chromatography to obtain products.

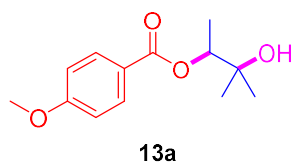

According to the general procedure C, 2-methylbut-2-ene (35.5 mg, 0.5 mmol, 5.0 equiv) was added to the reaction mixture. After reaction and work up, target product (8.0 mg, 33%) was obtained as a colorless oil.

**Eluting Solvents:** hexane/ ethyl acetate = 6/1, v/v.

**TLC:** (hexane/ethyl acetate = 3/1, v/v) R<sub>f</sub> = 0.4.

**<sup>1</sup>H NMR** (600 MHz, CDCl<sub>3</sub>) δ 8.05 – 8.00 (m, 2H), 6.98 – 6.93 (m, 2H), 5.04 (q, *J* = 6.4 Hz, 1H), 3.89 (s, 3H), 1.86 (s, 1H), 1.36 (d, *J* = 6.4 Hz, 3H), 1.31 (d, *J* = 5.6 Hz, 6H). **<sup>13</sup>C NMR** (150 MHz, CDCl<sub>3</sub>) δ 165.85, 163.47, 131.63, 122.75, 113.69, 72.45, 55.50, 26.31, 24.86, 15.09.

**ESI MS** *m/z*: 239.1 [M+H]<sup>+</sup>.

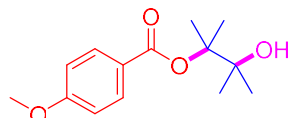

13b

According to the general procedure C, 2,3-dimethylbut-2-ene (42.5 mg, 0.5 mmol, 5.0 equiv) was added to the reaction mixture. After reaction and work up, target product (11.0 mg, 43%) was obtained as a colorless oil.

**Eluting Solvents:** hexane/ ethyl acetate = 6/1, v/v.

**TLC:** (hexane/ethyl acetate = 3/1, v/v)  $R_f$  = 0.4.

**$^1\text{H NMR}$**  (600 MHz,  $\text{CDCl}_3$ )  $\delta$  7.97 – 7.92 (m, 2H), 6.95 – 6.89 (m, 2H), 3.93 (s, 1H), 3.86 (s, 3H), 1.61 (s, 6H), 1.28 (s, 6H).  **$^{13}\text{C NMR}$**  (150 MHz,  $\text{CDCl}_3$ )  $\delta$  166.58, 163.43, 131.65, 123.58, 113.65, 89.98, 74.83, 55.50, 25.34, 22.22.

**ESI MS**  $m/z$ : 253.1  $[\text{M}+\text{H}]^+$ .

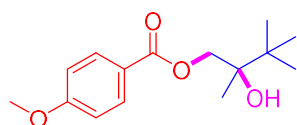

13c

According to the general procedure C, 2,3,3-trimethylbut-1-ene (49.5 mg, 0.5 mmol, 5.0 equiv) was added to the reaction mixture. After reaction and work up, target product (17.0 mg, 63%) was obtained as a colorless oil.

**Eluting Solvents:** hexane/ ethyl acetate = 6/1, v/v.

**TLC:** (hexane/ethyl acetate = 3/1, v/v)  $R_f$  = 0.5.

**$^1\text{H NMR}$**  (600 MHz,  $\text{CDCl}_3$ )  $\delta$  8.04 – 7.98 (m, 2H), 6.96 – 6.88 (m, 2H), 4.42 (d,  $J$  = 11.2 Hz, 1H), 4.30 (d,  $J$  = 11.2 Hz, 1H), 3.87 (s, 3H), 1.96 (s, 1H), 1.27 (s, 3H), 1.04 (s, 9H).  **$^{13}\text{C NMR}$**  (150 MHz,  $\text{CDCl}_3$ )  $\delta$  166.72, 163.53, 131.68, 122.42, 113.73, 75.73, 69.15, 55.49, 36.90, 25.47, 20.32.

**ESI MS**  $m/z$ : 267.1  $[\text{M}+\text{H}]^+$ .

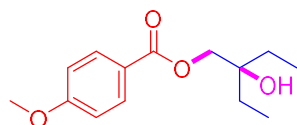

13d

According to the general procedure C, 3-methylenepentane (42.5 mg, 0.5 mmol, 5.0 equiv) was added to the reaction mixture. After reaction and work up, target product (12.0 mg, 47%) was obtained as a colorless oil.

**Eluting Solvents:** hexane/ethyl acetate = 6/1, v/v.

**TLC:** (hexane/ethyl acetate = 3/1, v/v)  $R_f$  = 0.5.

**$^1\text{H NMR}$**  (600 MHz,  $\text{CDCl}_3$ )  $\delta$  8.03 – 7.97 (m, 2H), 6.96 – 6.91 (m, 2H), 4.23 (s, 2H), 3.87 (s, 3H), 1.86 (s, 1H), 1.62 (q,  $J$  = 7.5 Hz, 4H), 0.95 (t,  $J$  = 7.5 Hz, 6H).  **$^{13}\text{C NMR}$**  (150 MHz,  $\text{CDCl}_3$ )  $\delta$  166.43, 163.53, 131.69, 122.36, 113.72, 74.05, 69.13, 55.49, 28.73, 7.69.

**ESI MS**  $m/z$ : 253.1  $[\text{M}+\text{H}]^+$ .

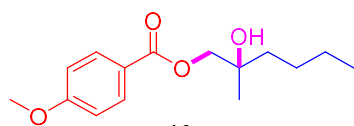

13e

According to the general procedure C, 2-methylhex-1-ene (49.6 mg, 0.5 mmol, 5.0 equiv) was added to the reaction mixture. After reaction and work up, target product (12.0 mg, 45%) was obtained as a colorless oil.

**Eluting Solvents:** hexane/ethyl acetate = 6/1, v/v.

**TLC:** (hexane/ethyl acetate = 3/1, v/v)  $R_f = 0.6$ .

**$^1\text{H NMR}$**  (600 MHz,  $\text{CDCl}_3$ )  $\delta$  8.05 – 7.98 (m, 2H), 6.96 – 6.91 (m, 2H), 4.24 – 4.16 (m, 2H), 3.87 (s, 3H), 1.96 (s, 1H), 1.60 – 1.57 (m, 2H), 1.43 – 1.29 (m, 4H), 1.28 (s, 3H), 0.92 (t,  $J = 7.1$  Hz, 3H).  **$^{13}\text{C NMR}$**  (150 MHz,  $\text{CDCl}_3$ )  $\delta$  166.39, 163.54, 131.70, 122.34, 113.72, 72.09, 71.27, 55.49, 39.01, 25.83, 24.02, 23.26, 14.07.

**ESI MS**  $m/z$ : 267.1  $[\text{M}+\text{H}]^+$ .

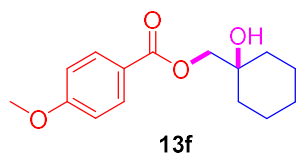

According to the general procedure C, methylenecyclohexane (48.6 mg, 0.5 mmol, 5.0 equiv) was added to the reaction mixture. After reaction and work up, target product (13.3 mg, 50%) was obtained as a colorless oil.

**Eluting Solvents:** hexane/ethyl acetate = 6/1, v/v.

**TLC:** (hexane/ethyl acetate = 3/1, v/v)  $R_f = 0.5$ .

**$^1\text{H NMR}$**  (600 MHz,  $\text{CDCl}_3$ )  $\delta$  8.04 – 7.98 (m, 2H), 6.96 – 6.90 (m, 2H), 4.21 (s, 2H), 3.87 (s, 3H), 1.91 (s, 1H), 1.70 – 1.64 (m, 4H), 1.62 – 1.49 (m, 5H), 1.35 – 1.28 (m, 1H).  **$^{13}\text{C NMR}$**  (150 MHz,  $\text{CDCl}_3$ )  $\delta$  166.42, 163.52, 131.71, 122.36, 113.70, 71.77, 70.93, 55.49, 34.44, 25.73, 21.67.

**ESI MS**  $m/z$ : 265.1  $[\text{M}+\text{H}]^+$ .

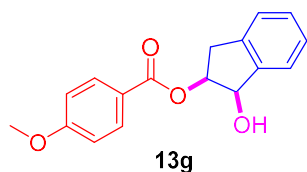

According to the general procedure C, 1H-indene (58.7 mg, 0.5 mmol, 5.0 equiv) was added to the reaction mixture. After reaction and work up, target product (18.0 mg, 63%) was obtained as a colorless oil.

**Eluting Solvents:** hexane/ethyl acetate = 6/1, v/v.

**TLC:** (hexane/ethyl acetate = 3/1, v/v)  $R_f = 0.6$ .

**$^1\text{H NMR}$**  (600 MHz,  $\text{CDCl}_3$ )  $\delta$  7.98 – 7.93 (m, 2H), 7.49 – 7.43 (m, 1H), 7.39 – 7.27 (m, 3H), 6.93 – 6.87 (m, 2H), 5.73 (dt,  $J = 6.6, 3.2$  Hz, 1H), 5.42 (d,  $J = 3.2$  Hz, 1H), 3.85 (s, 3H), 3.68 (dd,  $J = 16.8, 6.4$  Hz, 1H), 3.06 (dd,  $J = 16.8, 3.6$  Hz, 1H).  **$^{13}\text{C NMR}$**  (150 MHz,  $\text{CDCl}_3$ )  $\delta$  165.74, 163.63, 140.19, 140.07, 131.85, 129.52, 127.73, 125.44, 125.11, 121.99, 113.66, 81.96, 64.41, 55.48, 37.03.

**ESI MS**  $m/z$ : 267.1  $[\text{M}-\text{H}_2\text{O}+\text{H}]^+$ .

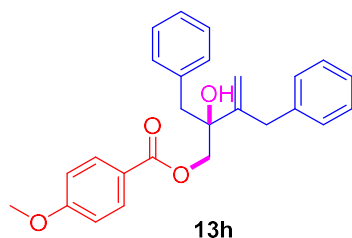

According to the general procedure C, (2,3-dimethylenebutane-1,4-diyl)dibenzene (118.5 mg, 0.5 mmol, 5.0 equiv) was added to the reaction mixture. After reaction and work up, target product (26.0 mg, 64%) was obtained as a white solid.

**Eluting Solvents:** hexane/ethyl acetate = 6/1, v/v.

**TLC:** (hexane/ethyl acetate = 3/1, v/v)  $R_f = 0.6$ .

**$^1\text{H NMR}$**  (600 MHz,  $\text{CDCl}_3$ )  $\delta$  7.94 – 7.88 (m, 2H), 7.33 – 7.22 (m, 7H), 7.21 – 7.15 (m, 1H), 7.15 – 7.12 (m, 2H), 6.94 – 6.89 (m, 2H), 5.17 (s, 1H), 4.77 (d,  $J = 1.6$  Hz, 1H), 4.45 (d,  $J = 11.4$  Hz, 1H), 4.28 (d,  $J = 11.4$  Hz, 1H), 3.87 (s, 3H), 3.45 (d,  $J = 15.8$  Hz, 1H), 3.39 (d,  $J = 15.8$  Hz, 1H), 3.09 – 3.00 (m, 2H), 2.31 (s, 1H).  **$^{13}\text{C NMR}$**  (150 MHz,  $\text{CDCl}_3$ )  $\delta$  166.18, 163.57, 150.17, 139.27, 135.79, 131.73, 130.69, 129.45, 128.39, 128.23, 126.86, 126.20, 122.13, 114.37, 113.70, 77.0, 69.26, 55.49, 43.76, 38.97.

**ESI MS**  $m/z$ : 403.2  $[\text{M}+\text{H}]^+$ .

## Unexpected Oxidations with 1a

### General procedure B.

A dry 8 mL vial equipped with a magnetic stirring bar was charged with 4,5,6,7-tetrachloro-1,3-dioxoisindolin-2-yl 4-methoxybenzoate **1a** (44.0 mg, 0.10 mmol, 1.0 equiv), Ir(dFppy)<sub>3</sub> (0.8 mg, 1.00 μmol, 0.01 equiv), and dry DCM (5.0 mL). Then olefins (5.0 equiv) were added. The reaction mixture was protected by nitrogen, irradiated by blue LED (Kessil PR160L-427 nm) for 24 h (the internal temperature of reaction solution is 40 – 45 °C). After reaction, the reaction mixture was filtered by Celite and washed with DCM (2 mL). The combined solution was concentrated under vacuum. The residue was purified directly by silica-gel column chromatography to obtain products.

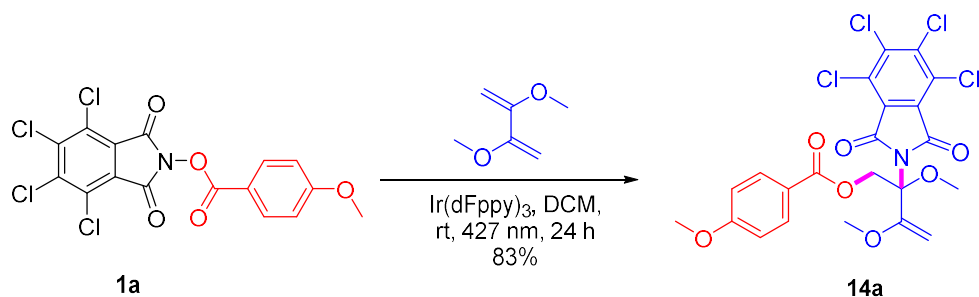

According to the general procedure B, 2,3-dimethoxybuta-1,3-diene (57.8 mg, 0.5 mmol, 5.0 equiv) was added to the reaction mixture. After reaction and work up, the target product (46.3 mg, 83%) was obtained as a white solid.

**Eluting Solvents:** hexane/ethyl acetate = 6/1, v/v.

**TLC:** (hexane/ethyl acetate = 3/1, v/v) R<sub>f</sub> = 0.5.

**<sup>1</sup>H NMR** (600 MHz, CDCl<sub>3</sub>) δ 8.00 – 7.95 (m, 2H), 6.94 – 6.89 (m, 2H), 5.50 (dd, *J* = 12.0, 1.6 Hz, 1H), 4.99 (dd, *J* = 12.0, 1.6 Hz, 1H), 4.74 (t, *J* = 2.2 Hz, 1H), 4.36 (t, *J* = 2.2 Hz, 1H), 3.86 (s, 3H), 3.53 (s, 3H), 3.46 (s, 3H). **<sup>13</sup>C NMR** (150 MHz, CDCl<sub>3</sub>) δ 165.25, 163.49, 163.23, 156.54, 140.62, 131.86, 129.96, 126.81, 122.29, 113.65, 90.73, 85.24, 60.58, 55.60, 55.46, 51.64.

**ESI MS** *m/z*: 549.9, 548.0 [M+H]<sup>+</sup>.

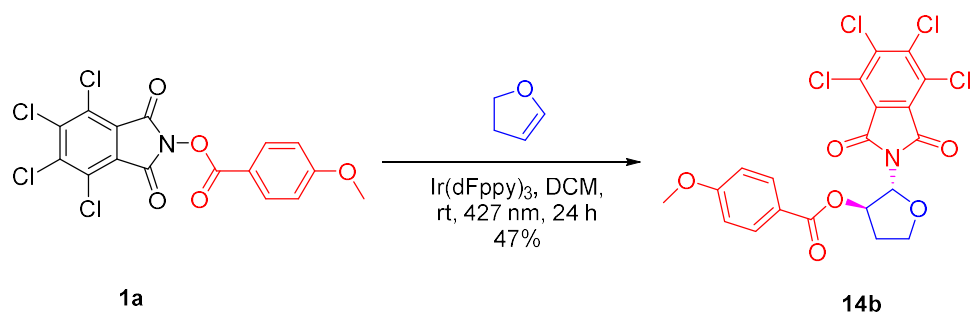

According to the general procedure B, 2,3-dihydrofuran (35.5 mg, 0.5 mmol, 5.0 equiv) was added to the reaction mixture. After reaction and work up, target product (24.3 mg, 47%) was obtained as a white solid. Relative stereochemistry was established by x-ray crystallography (see p S48). A single crystal was grown from slow evaporation from EtOAc.

**Eluting Solvents:** hexane/ethyl acetate = 6/1, v/v.

**TLC:** (hexane/ethyl acetate = 3/1, v/v) R<sub>f</sub> = 0.5.

**<sup>1</sup>H NMR** (600 MHz, CDCl<sub>3</sub>) δ 7.98 – 7.89 (m, 2H), 7.09 – 7.02 (m, 2H), 5.83 (ddd, *J* = 7.2, 3.2, 2.4 Hz, 1H), 5.79 (d, *J* = 2.2 Hz, 1H), 4.23 (td, *J* = 8.0, 5.6 Hz, 1H), 4.12 (dt, *J* = 8.4, 7.2 Hz, 1H),

3.84 (s, 3H), 2.76 (dq,  $J = 13.6, 7.6$  Hz, 1H), 2.19 (dddd,  $J = 13.2, 7.2, 5.6, 3.2$  Hz, 1H).  $^{13}\text{C}$  NMR (150 MHz,  $\text{CDCl}_3$ )  $\delta$  165.40, 163.94, 163.20, 139.09, 132.03, 128.97, 128.46, 121.68, 114.58, 85.69, 77.53, 69.31, 56.06, 32.83.

ESI MS  $m/z$ : 506.0, 504.0  $[\text{M}+\text{H}]^+$ .

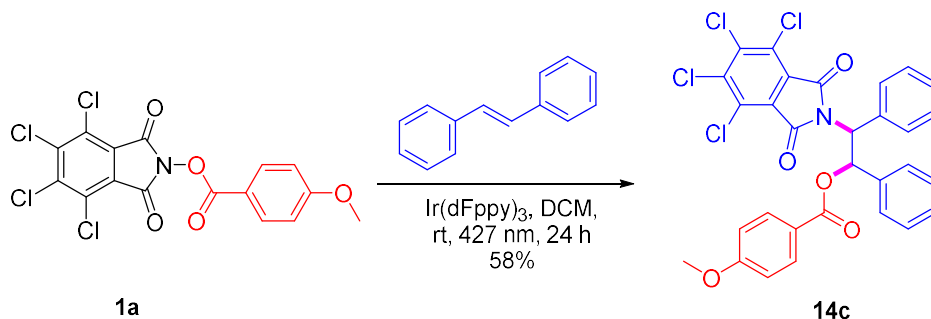

According to the general procedure B, (E)-1,2-diphenylethene (91.1 mg, 0.5 mmol, 5.0 equiv) was added to the reaction mixture. After reaction and work up, target product (36.0 mg, 58%) was obtained as a white solid.

**Eluting Solvents:** hexane/ethyl acetate = 10/1, v/v.

**TLC:** (hexane/ethyl acetate = 3/1, v/v)  $R_f = 0.6$ .

$^1\text{H}$  NMR (600 MHz,  $\text{CDCl}_3$ )  $\delta$  7.81 – 7.76 (m, 2H), 7.73 (dd,  $J = 7.2, 1.8$  Hz, 2H), 7.58 (dd,  $J = 7.2, 1.8$  Hz, 2H), 7.34 (t,  $J = 7.6$  Hz, 2H), 7.32 – 7.26 (m, 3H), 7.23 (t,  $J = 7.4$  Hz, 1H), 6.83 – 6.78 (m, 2H), 5.94 (d,  $J = 11.1$  Hz, 1H), 3.79 (s, 3H).  $^{13}\text{C}$  NMR (150 MHz,  $\text{CDCl}_3$ )  $\delta$  164.66, 163.43, 162.81, 140.26, 136.98, 135.95, 131.64, 129.69, 129.09, 128.91, 128.89, 128.76, 128.76, 127.63, 126.82, 122.07, 113.55, 73.06, 58.49, 55.42.

ESI MS  $m/z$ : 638.0, 636.0  $[\text{M}+\text{Na}]^+$ .

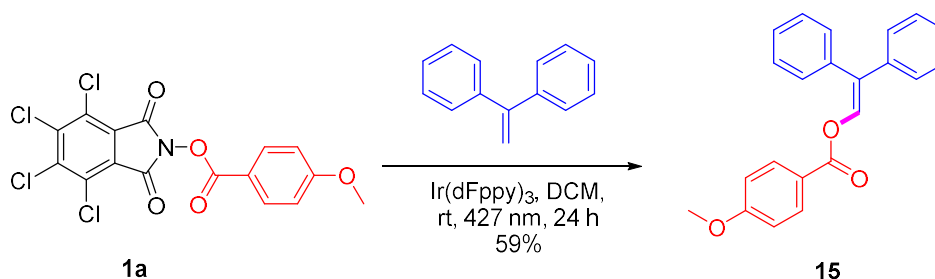

According to the general procedure B, ethene-1,1-diyldibenzene (91.1 mg, 0.5 mmol, 5.0 equiv) was added to the reaction mixture. After reaction and work up, target product (19.8 mg, 59%) was obtained as a white solid.

**Eluting Solvents:** hexane/ethyl acetate = 12/1, v/v.

**TLC:** (hexane/ethyl acetate = 3/1, v/v)  $R_f = 0.7$ .

$^1\text{H}$  NMR (600 MHz,  $\text{CDCl}_3$ )  $\delta$  7.96 – 7.92 (m, 2H), 7.91 (s, 1H), 7.42 (d,  $J = 4.4$  Hz, 4H), 7.39 – 7.29 (m, 6H), 6.94 – 6.88 (m, 2H), 3.86 (s, 3H).  $^{13}\text{C}$  NMR (150 MHz,  $\text{CDCl}_3$ )  $\delta$  163.91, 163.19, 139.07, 136.99, 132.59, 132.25, 130.22, 128.43, 128.38, 128.09, 127.60, 127.56, 127.38, 121.15, 113.92, 55.52.

ESI MS  $m/z$ : 353.1  $[\text{M}+\text{Na}]^+$ .

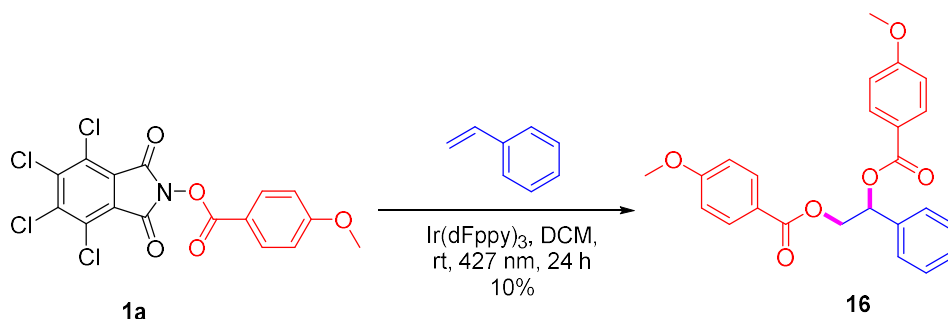

According to the general procedure B, styrene (56.7 mg, 0.5 mmol, 5.0 equiv) was added to the reaction mixture. After reaction and work up, target product (4.3 mg, 10%) was obtained as a colorless oil.

**Eluting Solvents:** hexane/ethyl acetate = 12/1, v/v.

**TLC:** (hexane/ethyl acetate = 3/1, v/v)  $R_f = 0.7$ .

**$^1\text{H NMR}$**  (600 MHz,  $\text{CDCl}_3$ )  $\delta$  8.08 – 8.02 (m, 2H), 7.97 – 7.92 (m, 2H), 7.53 – 7.48 (m, 2H), 7.42 – 7.37 (m, 2H), 7.37 – 7.31 (m, 1H), 6.95 – 6.90 (m, 2H), 6.90 – 6.85 (m, 2H), 6.37 (dd,  $J = 8.2, 3.7$  Hz, 1H), 4.70 (dd,  $J = 11.9, 8.2$  Hz, 1H), 4.61 (dd,  $J = 11.9, 3.8$  Hz, 1H), 3.86 (s, 3H), 3.84 (s, 3H).  **$^{13}\text{C NMR}$**  (150 MHz,  $\text{CDCl}_3$ )  $\delta$  165.99, 165.40, 163.56, 163.48, 136.94, 131.86, 131.76, 128.73, 128.62, 126.71, 122.35, 122.16, 113.70, 113.67, 73.76, 66.53, 55.48, 55.45.

**ESI MS**  $m/z$ : 835.2 [ $2\text{M} + \text{Na}$ ] $^+$ .

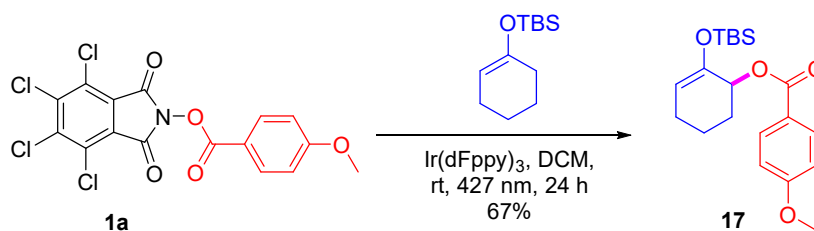

According to the general procedure B, tert-butyl(cyclohex-1-en-1-yloxy)dimethylsilane (107.2 mg, 0.5 mmol, 5.0 equiv) was added to the reaction mixture. After reaction and work up, target product (24.6 mg, 67%) was obtained as a colorless oil.

**Eluting Solvents:** hexane/ethyl acetate = 12/1, v/v.

**TLC:** (hexane/ethyl acetate = 3/1, v/v)  $R_f = 0.7$ .

**$^1\text{H NMR}$**  (600 MHz,  $\text{CDCl}_3$ )  $\delta$  8.13 – 7.93 (m, 2H), 6.98 – 6.76 (m, 2H), 5.51 – 5.39 (m, 1H), 5.16 (dd,  $J = 5.0, 3.2$  Hz, 1H), 3.86 (s, 3H), 2.21 – 2.12 (m, 1H), 2.10 – 2.02 (m, 1H), 2.02 – 1.93 (m, 1H), 1.87 – 1.80 (m, 1H), 1.70 – 1.59 (m, 2H), 0.81 (s, 9H), 0.14 (s, 3H), 0.07 (s, 3H).  **$^{13}\text{C NMR}$**  (150 MHz,  $\text{CDCl}_3$ )  $\delta$  168.04, 165.29, 149.77, 133.77, 125.28, 115.57, 111.57, 71.91, 57.51, 31.68, 27.62, 26.07, 20.34, 20.00, -2.14, -2.65.

**ESI MS**  $m/z$ : 363.1 [ $\text{M} + \text{H}$ ] $^+$ .



## Evidence for Radical Intermediates

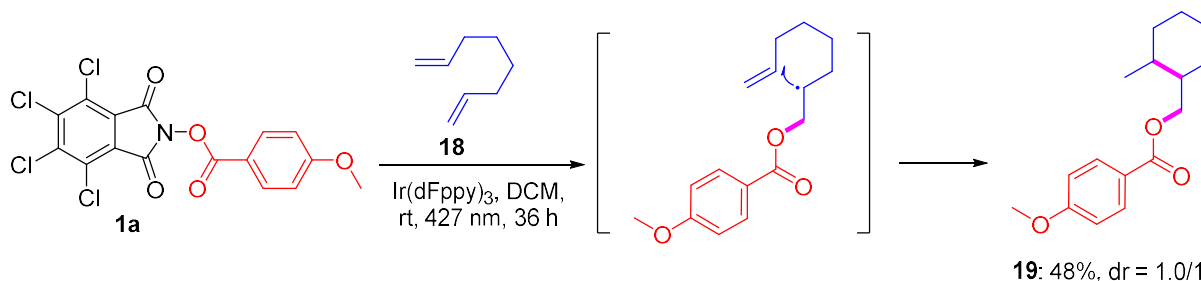

According to the general procedure B, octa-1,7-diene (55.7 mg, 0.5 mmol, 5.0 equiv) was added to the reaction mixture. The mixture was irradiated by blue LED (Kessil PR160L-427 nm) for 36 h. After reaction and work up, two cyclized products (12.8 mg, 48%, dr = 1/1) were obtained as two main isomers.

**Eluting Solvents:** hexane/ethyl acetate = 15/1, v/v.

**TLC:** (hexane/ethyl acetate = 3/1, v/v)  $R_f$  = 0.8.

**$^1\text{H NMR}$**  (600 MHz,  $\text{CDCl}_3$ )  $\delta$  8.02 – 7.97 (m, 2H), 6.92 – 6.90 (m, 2H), 4.46 – 4.12 (m, 2H), 3.86 (s, 3H), 2.09 – 1.60 (m, 4H), 1.56 – 1.13 (m, 6H), 0.98 (d,  $J$  = 6.0 Hz, 1.5H), 0.94 (d,  $J$  = 6.9 Hz, 1.5H).  **$^{13}\text{C NMR}$**  (150 MHz,  $\text{CDCl}_3$ )  $\delta$  166.55, 166.51, 163.24, 131.55, 123.04, 123.03, 113.59, 113.57, 67.83, 55.44, 43.80, 39.20, 35.66, 34.37, 32.39, 30.16, 26.37, 26.35, 26.14, 24.86, 20.28.

**ESI MS**  $m/z$ : 285.1  $[\text{M}+\text{Na}]^+$ .

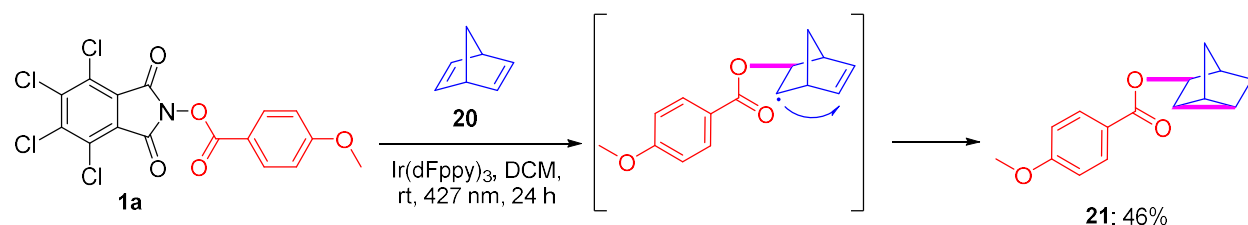

According to the general procedure B, 2,5-Norbornadiene (46.6 mg, 0.5 mmol, 5.0 equiv) was added to the reaction mixture. The mixture was irradiated by blue LED (Kessil PR160L-427 nm) for 24 h. After reaction and work up, target product (11.3 mg, 46%) was obtained as a colorless oil.

**Eluting Solvents:** hexane/ethyl acetate = 15/1, v/v.

**TLC:** (hexane/ethyl acetate = 3/1, v/v)  $R_f$  = 0.7.

**$^1\text{H NMR}$**  (600 MHz,  $\text{CDCl}_3$ )  $\delta$  8.01 – 7.94 (m, 2H), 6.94 – 6.87 (m, 2H), 4.88 (t,  $J$  = 1.8 Hz, 1H), 3.86 (s, 3H), 2.15 (p,  $J$  = 1.5 Hz, 1H), 1.92 (dt,  $J$  = 10.4, 1.4 Hz, 1H), 1.57 – 1.52 (m, 1H), 1.39 – 1.28 (m, 5H).  **$^{13}\text{C NMR}$**  (150 MHz,  $\text{CDCl}_3$ )  $\delta$  166.36, 163.18, 131.51, 123.15, 113.49, 80.10, 55.41, 33.55, 30.48, 30.47, 13.90, 13.05, 11.29.

**ESI MS**  $m/z$ : 245.1  $[\text{M}+\text{H}]^+$ .

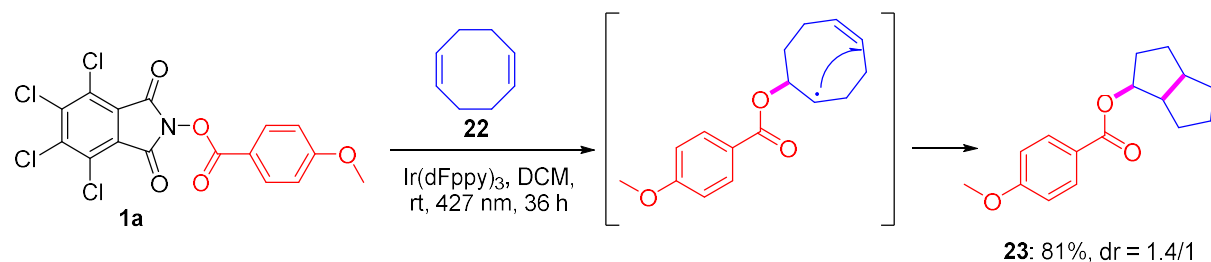

According to the general procedure B, (1Z,5Z)-cycloocta-1,5-diene (54.5 mg, 0.5 mmol, 5.0 equiv) was added to the reaction mixture. The mixture was irradiated by blue LED (Kessil PR160L-427 nm) for 24 h. After reaction and work up, target product (21.3 mg, 81%, dr = 1.4/1) was obtained as a colorless oil.

**Eluting Solvents:** hexane/ ethyl acetate = 12/1, v/v.

**TLC:** (hexane/ ethyl acetate = 3/1, v/v)  $R_f$  = 0.7.

**$^1\text{H NMR}$**  (600 MHz,  $\text{CDCl}_3$ )  $\delta$  8.02 – 7.95 (m, 2H), 6.94 – 6.88 (m, 2H), 5.31 – 5.28 (m, 0.4 H) 5.03 (td,  $J$  = 4.8, 4.3, 2.6 Hz, 0.53H), 3.86 (d,  $J$  = 2.3 Hz, 3H), 2.77 – 2.47 (m, 2H), 2.05 – 1.74 (m, 4H), 1.70 – 1.18 (m, 6H).  **$^{13}\text{C NMR}$**  (150 MHz,  $\text{CDCl}_3$ )  $\delta$  166.16, 163.20, 163.15, 131.51, 123.42, 123.25, 113.57, 113.49, 82.82, 77.98, 55.44, 49.96, 45.99, 42.69, 41.94, 34.53, 34.18, 31.90, 31.70, 31.40, 30.68, 29.58, 27.64, 27.49, 26.81.

**ESI MS**  $m/z$ : 543.2  $[2\text{M}+\text{Na}]^+$ .

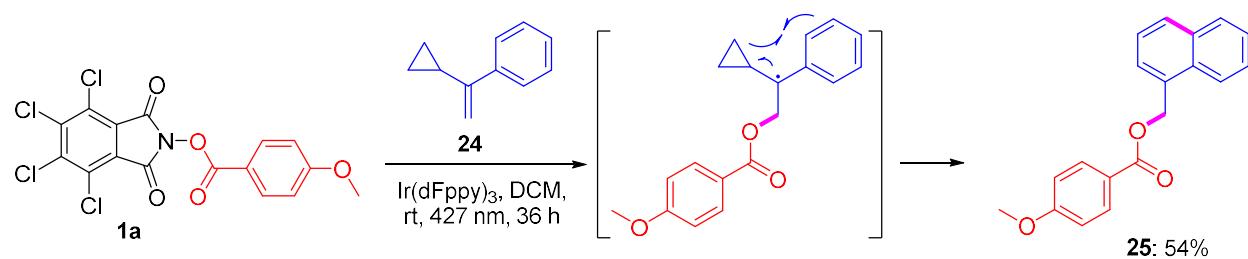

According to the general procedure B, (1-cyclopropylvinyl)benzene (73.0 mg, 0.5 mmol, 5.0 equiv) was added to the reaction mixture. The mixture was irradiated by blue LED (Kessil PR160L-427 nm) for 36 h. After reaction and work up, target product (16.0 mg, 54%) was obtained as a solid.

**Eluting Solvents:** hexane/ethyl acetate = 10/1, v/v.

**TLC:** (hexane/ethyl acetate = 3/1, v/v)  $R_f$  = 0.6.

**$^1\text{H NMR}$**  (600 MHz,  $\text{CDCl}_3$ )  $\delta$  8.14 – 8.09 (m, 1H), 8.04 – 7.98 (m, 2H), 7.93 – 7.85 (m, 2H), 7.63 (dd,  $J$  = 6.9, 1.2 Hz, 1H), 7.58 – 7.51 (m, 2H), 7.48 (dd,  $J$  = 8.3, 7.0 Hz, 1H), 6.91 – 6.86 (m, 2H), 5.79 (s, 2H), 3.84 (s, 3H).  **$^{13}\text{C NMR}$**  (150 MHz,  $\text{CDCl}_3$ )  $\delta$  166.28, 163.45, 133.75, 131.81, 131.78, 131.75, 129.27, 128.74, 127.42, 126.61, 125.96, 125.34, 123.71, 122.50, 113.63, 64.90, 55.45.

**ESI MS**  $m/z$ : 607.2  $[2\text{M}+\text{Na}]^+$ .

The analytic data is consistent with those reported in the literature.<sup>17</sup>

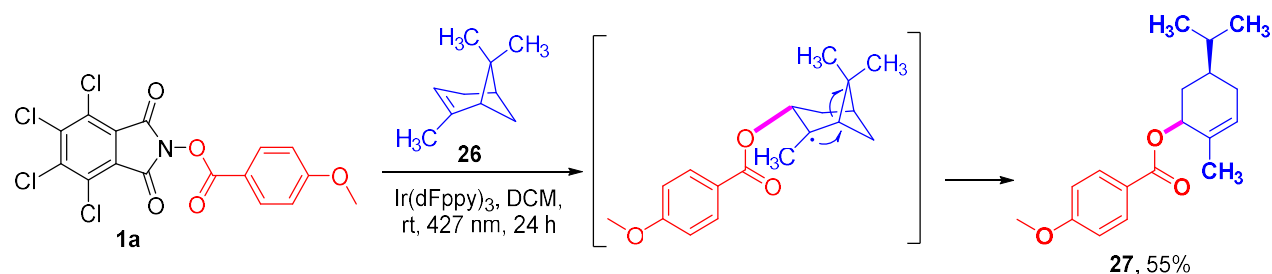

According to the general procedure B, alpha-Pinene (69.0 mg, 0.5 mmol, 5.0 equiv) was added to the reaction mixture. The mixture was irradiated by blue LED (Kessil PR160L-427 nm) for 24 h. After reaction and work up, target product (16.0 mg, 55%) was obtained as a colorless oil.

**Eluting Solvents:** hexane/ ethyl acetate = 12/1, v/v.

**TLC:** (hexane/ ethyl acetate = 3/1, v/v)  $R_f$  = 0.8.

**$^1\text{H NMR}$**  (600 MHz,  $\text{CDCl}_3$ )  $\delta$  8.11 – 7.93 (m, 2H), 6.99 – 6.84 (m, 2H), 5.76 (dq,  $J$  = 5.4, 1.6 Hz, 1H), 5.45 (dd,  $J$  = 4.2, 2.2 Hz, 1H), 3.86 (s, 3H), 2.21 – 2.09 (m, 1H), 2.00 (dq,  $J$  = 13.9, 2.1 Hz,

1H), 1.78 – 1.64 (m, 4H), 1.53 – 1.44 (m, 2H), 0.88 – 0.86 (m, 6H). <sup>13</sup>C NMR (150 MHz, CDCl<sub>3</sub>)  
δ 166.28, 163.25, 131.65, 131.25, 128.33, 123.28, 113.55, 71.27, 55.46, 34.97, 32.75, 31.79, 28.89,  
20.78, 19.99, 19.43.

**ESI MS** m/z: 289.2 [M+H]<sup>+</sup>.

## Mechanism Exploration

### Conduct the reaction in DCM-*d*<sub>2</sub>

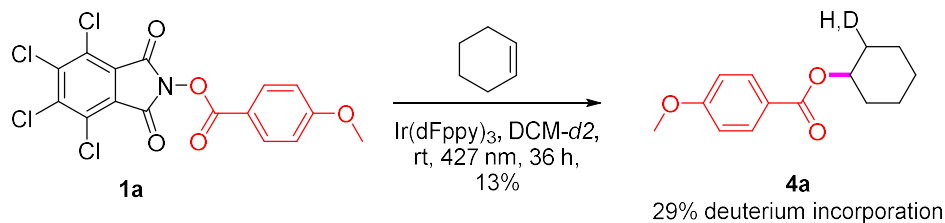

A dry 8 mL vial equipped with a magnetic stirring bar was charged with substrate **1a** (44.0 mg, 0.10 mmol, 1.0 equiv), Ir(dFppy)<sub>3</sub> (0.8 mg, 1.00 μmol, 0.01 equiv), and DCM-*d*<sub>2</sub> (4.0 mL). Then olefins (41.5 mg, 0.5 mmol, 5.0 equiv) were added. The reaction mixture was protected by nitrogen, irradiated by blue LED (Kessil PR160L-427 nm) for 36 h (the internal temperature of reaction solution is 40 – 45 °C). After reaction, TLC showed only a little product and most of SM remained, the reaction mixture was filtered by Celite and washed with DCM (2 mL). The combined solution was concentrated under vacuum. The residue was purified directly by silica-gel column chromatography (Eluting Solvents: hexane/ethyl acetate = 12/1, v/v) to obtain product as a colorless oil (3.0 mg, 13%).

**TLC:** (hexane/ethyl acetate = 3/1, v/v)  $R_f = 0.8$ .

**<sup>1</sup>H NMR** (400 MHz, DMSO, *exact integration for C2/6 hydrogens*)  $\delta$  7.96 – 7.87 (m, 2H), 7.09 – 7.01 (m, 2H), 4.90 (tt,  $J = 8.4, 3.8$  Hz, 1H), 3.83 (s, 3H), **1.91 – 1.81 (dd,  $J = 7.9, 4.0$  Hz, 1.93H)**, 1.77 – 1.66 (m, 2 H), **1.59 – 1.47 (m, 2.91H)**, 1.47 – 1.26 (m, 3 H).

**ESI MS**  $m/z$ : 235.1 [M+H]<sup>+</sup>.

**Original for reference <sup>1</sup>H NMR** (600 MHz, DMSO, *exact integration C2/6 hydrogens*)  $\delta$  7.96 – 7.91 (m, 2H), 7.06 (d,  $J = 8.7$  Hz, 2H), 4.91 (tt,  $J = 8.5, 3.8$  Hz, 1H), 3.85 (s, 3H), **1.92– 1.85 (m, 2.04H)**, 1.78 – 1.70 (m, 2 H), **1.59 – 1.49 (m, 3.09H)**, 1.47 – 1.29 (m, 3 H).

### Control reaction to test for potential poisons in CD<sub>2</sub>Cl<sub>2</sub>: Reaction in DCM-*d*<sub>2</sub>/DCM (1/1, v/v)

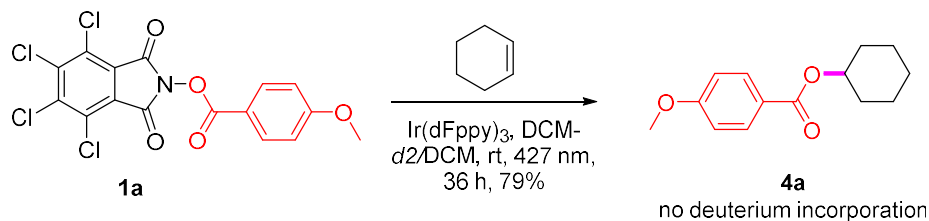

A dry 8 mL vial equipped with a magnetic stirring bar was charged with substrate **1A** (44.0 mg, 0.10 mmol, 1.0 equiv), Ir(dFppy)<sub>3</sub> (0.8 mg, 1.00 μmol, 0.01 equiv), and DCM-*d*<sub>2</sub>/DCM (4.0 mL, 1/1, v/v). Next, olefin (41.5 mg, 0.5 mmol, 5.0 equiv) was added. The reaction mixture was protected by nitrogen and irradiated by blue LED (Kessil PR160L-427 nm) for 24 h (the internal temperature of reaction solution is 40 – 45 °C). After reaction, the reaction mixture was filtered by Celite and washed with DCM (2 mL). The combined solution was concentrated under vacuum. The residue was purified directly by silica-gel column chromatography (Eluting Solvents: hexane/ethyl acetate = 15/1, v/v) to obtain product as a colorless oil (18.7 mg, 79%).

**TLC:** (hexane/ethyl acetate = 3/1, v/v)  $R_f = 0.8$ .

**<sup>1</sup>H NMR** (400 MHz, DMSO, *exact integration for C2/6 hydrogens*) **<sup>1</sup>H NMR** (600 MHz, DMSO)  $\delta$  7.93 – 7.88 (m, 2H), 7.07 – 7.01 (m, 2H), 4.89 (tt,  $J = 8.4, 3.8$  Hz, 1H), 3.83 (s, 3H), **1.90 – 1.81**

(*m*, 2.06 H), 1.71 (dtt, *J* = 13.1, 6.4, 3.6 Hz, 2 H), 1.52 (dtd, *J* = 12.7, 9.3, 3.5 Hz, 3.01 H), 1.45 – 1.35 (m, 2H), 1.32 (ddd, *J* = 12.9, 8.3, 3.3 Hz, 1H).  
ESI MS *m/z*: 235.1 [M+H]<sup>+</sup>.

### Reaction in CD<sub>3</sub>CN

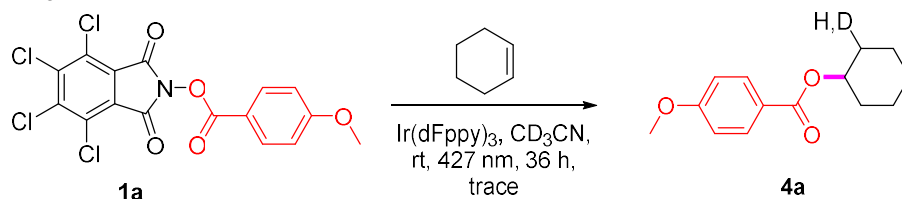

A dry 8 mL vial equipped with a magnetic stirring bar was charged with substrate **1A** (44.0 mg, 0.10 mmol, 1.0 equiv), Ir(dFppy)<sub>3</sub> (0.8 mg, 1.00 μmol, 0.01 equiv), and CD<sub>3</sub>CN (4.0 mL). Then olefins (41.5 mg, 0.5 mmol, 5.0 equiv) were added. The suspension was protected by nitrogen, irradiated by blue LED (Kessil PR160L-427 nm) for 36 h. After reaction, TLC showed only trace product and most of SM remained. The reaction mixture wasn't purified.

### MeOD-*d*4 as additive

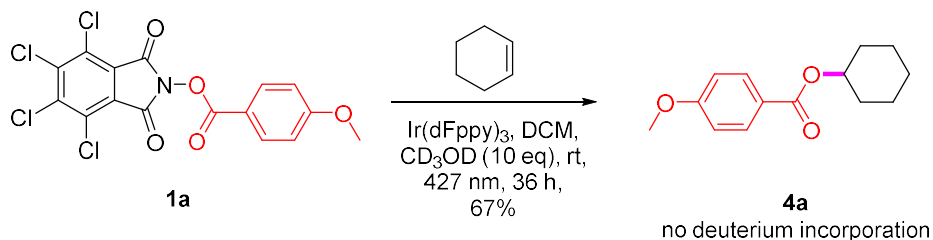

A dry 8 mL vial equipped with a magnetic stirring bar was charged with substrate **1A** (44.0 mg, 0.10 mmol, 1.0 equiv), Ir(dFppy)<sub>3</sub> (0.8 mg, 1.00 μmol, 0.01 equiv), and DCM (5.0 mL). Then olefins (41.5 mg, 0.5 mmol, 5.0 equiv) and MeOD-*d*4 (36.5 mg, 1 mmol, 10 equiv) were added. The reaction mixture was protected by nitrogen, irradiated by blue LED (Kessil PR160L-427 nm) for 36 h (the internal temperature of reaction solution is 40 – 45 °C). After reaction, the reaction mixture was filtered by Celite and washed with DCM (2 mL). Combined solution was concentrated under vacuum. The residue was purified directly by silica-gel column chromatography (Eluting Solvents: hexane/ethyl acetate = 12/1, v/v) to obtain products as a colorless oil (15.8 mg, 67%).

TLC: (hexane/ethyl acetate = 3/1, v/v) R<sub>f</sub> = 0.8.

<sup>1</sup>H NMR (400 MHz, DMSO, *exact integration for C2/6 hydrogens*) δ 7.95 – 7.87 (m, 2H), 7.10 – 7.00 (m, 2H), 4.89 (tt, *J* = 8.4, 3.8 Hz, 1H), 3.83 (s, 3H), 1.90 – 1.80 (*m*, 2.04 H), 1.77 – 1.66 (m, 2 H), 1.59 – 1.46 (*m*, 3.08H), 1.36 – 1.24 (m, 3 H).

ESI MS *m/z*: 235.1 [M+H]<sup>+</sup>.

### Deuterium cyclohexene-*d*<sub>10</sub> as reagent

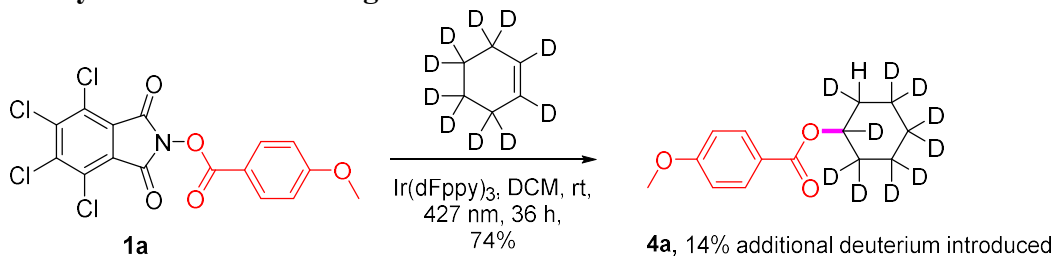

A dry 8 mL vial equipped with a magnetic stirring bar was charged with substrate **1A** (44.0 mg, 0.10 mmol, 1.0 equiv), Ir(dFppy)<sub>3</sub> (0.8 mg, 1.00 μmol, 0.01 equiv), and DCM (5.0 mL). Then cyclohex-1-ene-*d*<sub>10</sub> (46.6 mg, 0.5 mmol, 5.0 equiv) was added. The reaction mixture was protected by nitrogen, irradiated by blue LED (Kessil PR160L-427 nm) for 36 h (the internal temperature of reaction solution is 40 – 45 °C). After reaction, the reaction mixture was filtered by Celite and washed with DCM (2 mL). The combined solution was concentrated under vacuum. The residue was purified directly by silica-gel column chromatography (Eluting Solvents: hexane/ethyl acetate = 12/1, v/v) to obtain products as colorless oil (18.2 mg, 74%).

**TLC:** (hexane/ethyl acetate = 3/1, v/v) R<sub>f</sub> = 0.8.

**<sup>1</sup>H NMR** (400 MHz, DMSO, *exact integration for C2/6 hydrogens*) δ 7.95 – 7.87 (m, 2H), 7.08 – 7.00 (m, 2H), 3.83 (s, 3H), **1.81 (s, 0.42H)**, **1.48 (s, 0.44H)**, **<sup>13</sup>C NMR** (150 MHz, DMSO) δ 164.76, 163.05, 131.17, 122.51, 113.98, 71.46, 55.51, 30.31, 23.76, 22.11.

**ESI MS** m/z: 245.1 [M+H]<sup>+</sup>.

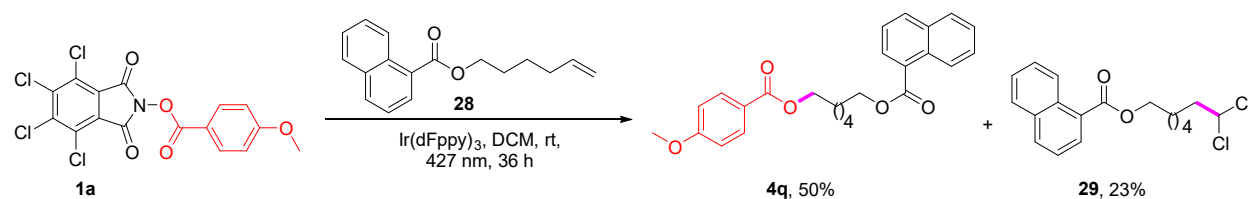

Refer to former procedure for preparing compound **4q**. The dichloro byproduct was received by silica-gel column chromatography (Eluting Solvents: hexane/dichloromethane = 3/1, v/v) to obtain products **29** as colorless oil (8.0 mg, 23%).

**TLC:** (hexane/ethyl acetate = 3/1, v/v) R<sub>f</sub> = 0.9.

**<sup>1</sup>H NMR** (600 MHz, CDCl<sub>3</sub>) δ 8.90 (dq, *J* = 8.8, 1.0 Hz, 1H), 8.17 (dd, *J* = 7.2, 1.2 Hz, 1H), 8.03 (dt, *J* = 8.2, 1.2 Hz, 1H), 7.89 (dt, *J* = 8.2, 0.8 Hz, 1H), 7.62 (ddd, *J* = 8.5, 6.8, 1.4 Hz, 1H), 7.57 – 7.48 (m, 2H), 5.75 (t, *J* = 6.0 Hz, 1H), 4.42 (t, *J* = 6.6 Hz, 2H), 2.25 – 2.18 (m, 2H), 1.91 – 1.81 (m, 2H), 1.64 – 1.58 (m, 2H), 1.53 (dtd, *J* = 9.2, 7.2, 5.5 Hz, 2H), 1.49 – 1.41 (m, 2H). **<sup>13</sup>C NMR** (150 MHz, CDCl<sub>3</sub>) δ 167.70, 133.86, 133.31, 131.34, 130.07, 128.58, 127.75, 127.40, 126.23, 125.80, 124.53, 73.56, 65.00, 43.49, 28.62, 28.25, 25.96, 25.84.

**ESI MS** m/z: 339.0 [M+H]<sup>+</sup>.

## References

1. Cheng, W. M., Shang, R., Zhao, B., Xing, W. L., Fu, Y. Isonicotinate Ester Catalyzed Decarboxylative Borylation of (Hetero) Aryl and Alkenyl Carboxylic Acids through N-Hydroxyphthalimide Esters. *Org. Lett.* **2017**, *19*, 4291-4294.
2. Guo, Z. Z., Jiang, X. P., Jin, C., Zhou, J. D., Sun, B., Su, W. K. Copper-Catalyzed Highly Efficient Esterification of Aldehydes with N-Hydroxyphthalimide via Cross-Dehydrogenative Coupling in Water at Room Temperature, *Synlett.* **2017**, *28*, 1321-1326.
3. Xu, X. H., Li, P. P., Huang, Y. Y., Tong, C., Yan, Y.Y., Xie, Y. Y. Atmospheric oxidative catalyst-free cross-dehydrogenative coupling of aldehydes with N-hydroxyimides. *Tetrahedron Lett.* **2017**, *58*, 1742-1746.
4. Monica, P., Andrea, P., Luca, D. A copper-catalysed amidation of aldehydes via N-hydroxysuccinimide ester formation. *Org. Biomol. Chem.* **2013**, *11*, 8241-8246.
5. Lu, B. L., Williams, G. M., Verdon, D. J., Rod Dunbar, P., Margaret, A., Brimble, M. A. Synthesis and Evaluation of Novel TLR2 Agonists as Potential Adjuvants for Cancer Vaccines, *J. Med. Chem.* **2020**, *63*, 2282-2291
6. Nicole, S. Y., Choi, L. S., Kim, S., Park, C. M. The synthesis of pyrroles and oxazoles based on gold  $\alpha$ -imino carbene complexes. *Chem. Commun.* **2016**, *52*, 7336-7339.
7. Cao, J., Lv, D. Q., Yu, F., Chou, M. F., Li, Y. J., Bao, H. L. Regioselective Three-Component Synthesis of Vicinal Diamines via 1,2-Diamination of Styrenes. *Org. Lett.* **2021**, *23*, 3184-3189.
8. Jeffrey, S. Q., Alexander, F., Bruce, A. A. A flexible approach to Pd-catalyzed carbonylations via aroyl dimethylaminopyridinium salts. *Chem. Sci.* **2016**, *7*, 295-300.
9. Chen, Z. W., Wen, Y. L., Fu, Y. J., Chen, H., Ye, M., Luo, G. T. Graphene Oxide: An Efficient Acid Catalyst for the Construction of Esters from Acids and Alcohols. *Synlett* **2017**, *8*, 981-985.
10. Liu, L. X., Zhang, H. Y., Yin, G. H., Zhang, Y. C., Zhao, J. Q. Synthesis of N-unsubstituted cyclic imides from anhydride with urea in deep eutectic solvent (DES) choline chloride/urea. *Chem. Pap.* **2020**, *74*, 1351-1357.
11. Wu, H. X., Guo, W. J., Daniel, S., Li, Y., Liu, C., Zeng, Z. Fluoride-Catalyzed Esterification of Amides. *Chem. Eur. J.* **2018**, *24*, 3444-3447.
12. Gunindra, P., Das, Diparjun, D., Lalthazuala, R. A microwave-assisted highly practical chemoselective esterification and amidation of carboxylic acids. *RSC Adv.* **2016**, *96*, 93729-93740.
13. Yann, B. B., Corinne, G., Gregory, D. Cobalt-Catalyzed Esterification of Amides. *Chem. Eur. J.* **2017**, *23*, 10043-10047.
14. Huang, M. W., Li, L. Z., Zhi, G., Chen, Q. Y., Guo, Yong. Visible-Light-Induced Photocatalysis of 1,1,1-Trifluoro-2-iodoethane with Alkylalkenes and Silyl Enol Ethers. *Synth.* **2015**, *47*, 3891-3900.
15. Hiroko, M., Keisuke, N., Hideki, Y. Palladium-Catalyzed Alkoxy carbonylation of Arylsulfoniums. *Org. Lett.* **2019**, *21*, 2518-2522.
16. Pablo, M. B., Javier, M. D. F., Francisco, M. G. Microwave-Enhanced Coupling of Carboxylic Acids with Liquid Ketones and Cyclic Ethers Using Tetrabutylammonium Iodide/t-Butyl Hydroperoxide. *J. Org. Chem.* **2020**, *85*, 6027-6043.
17. Tanay, K., Richard, C. L. Benzylic C-H activation and C-O bond formation via aryl to benzylic 1,4-palladium migrations. *Tetrahedron*, **2008**, *64*, 6090-6102.

# Crystal data for product 14b

CCDC Deposition Number 2103778

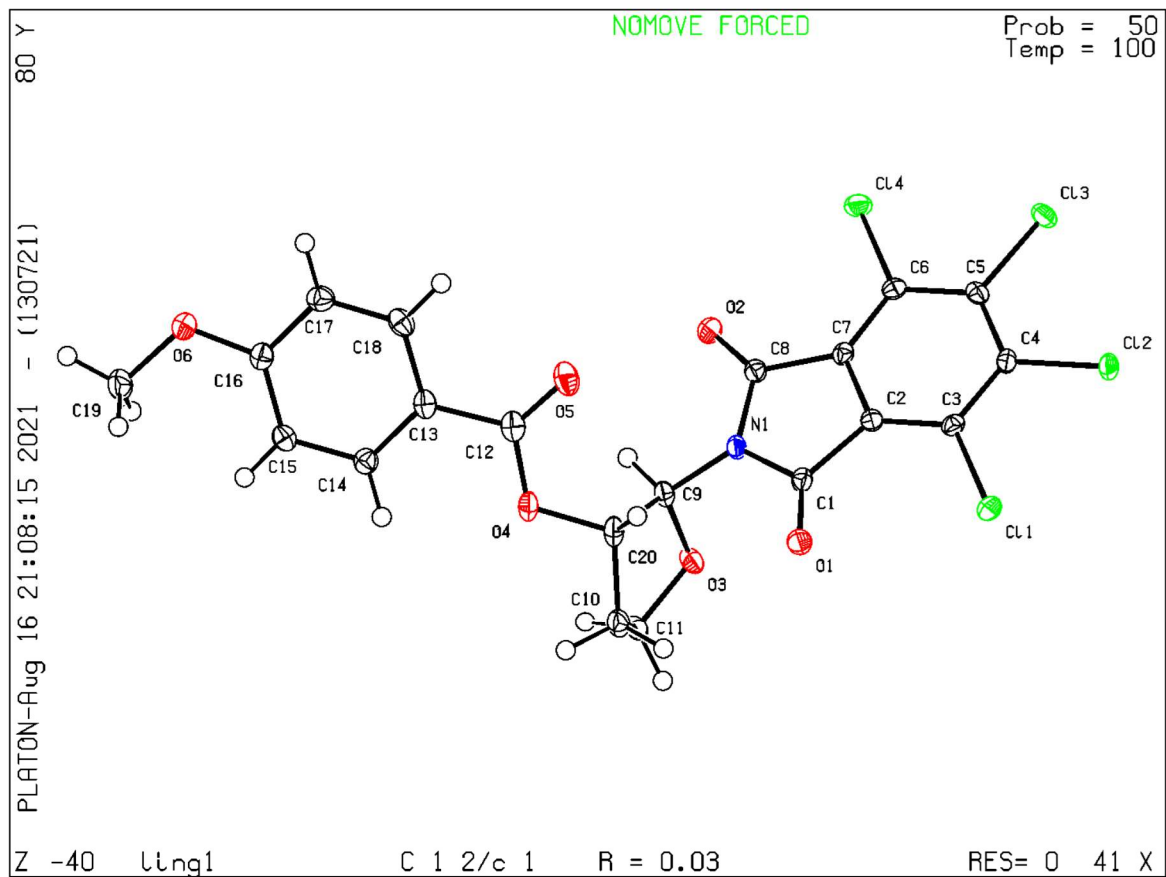



# NMR Spectra

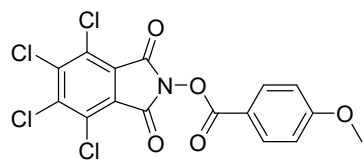

1a

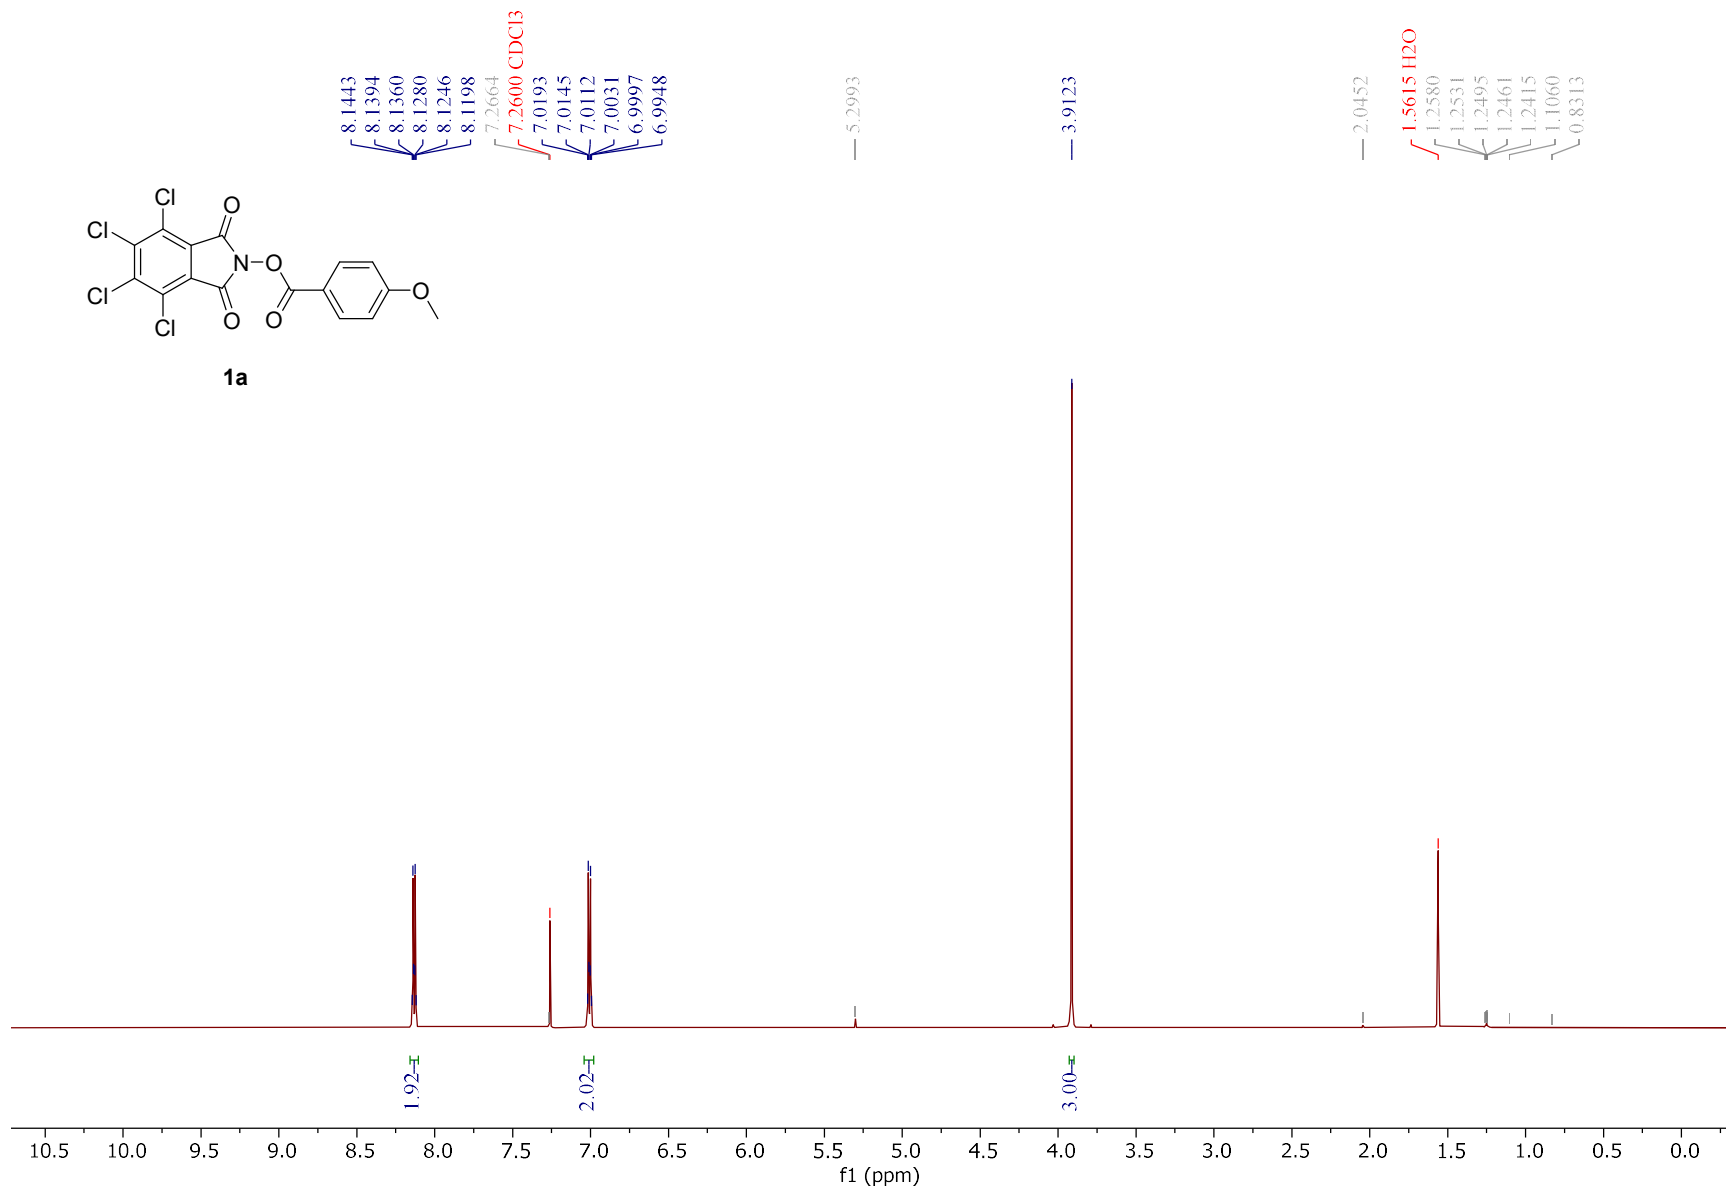

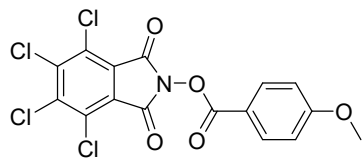

**1a**

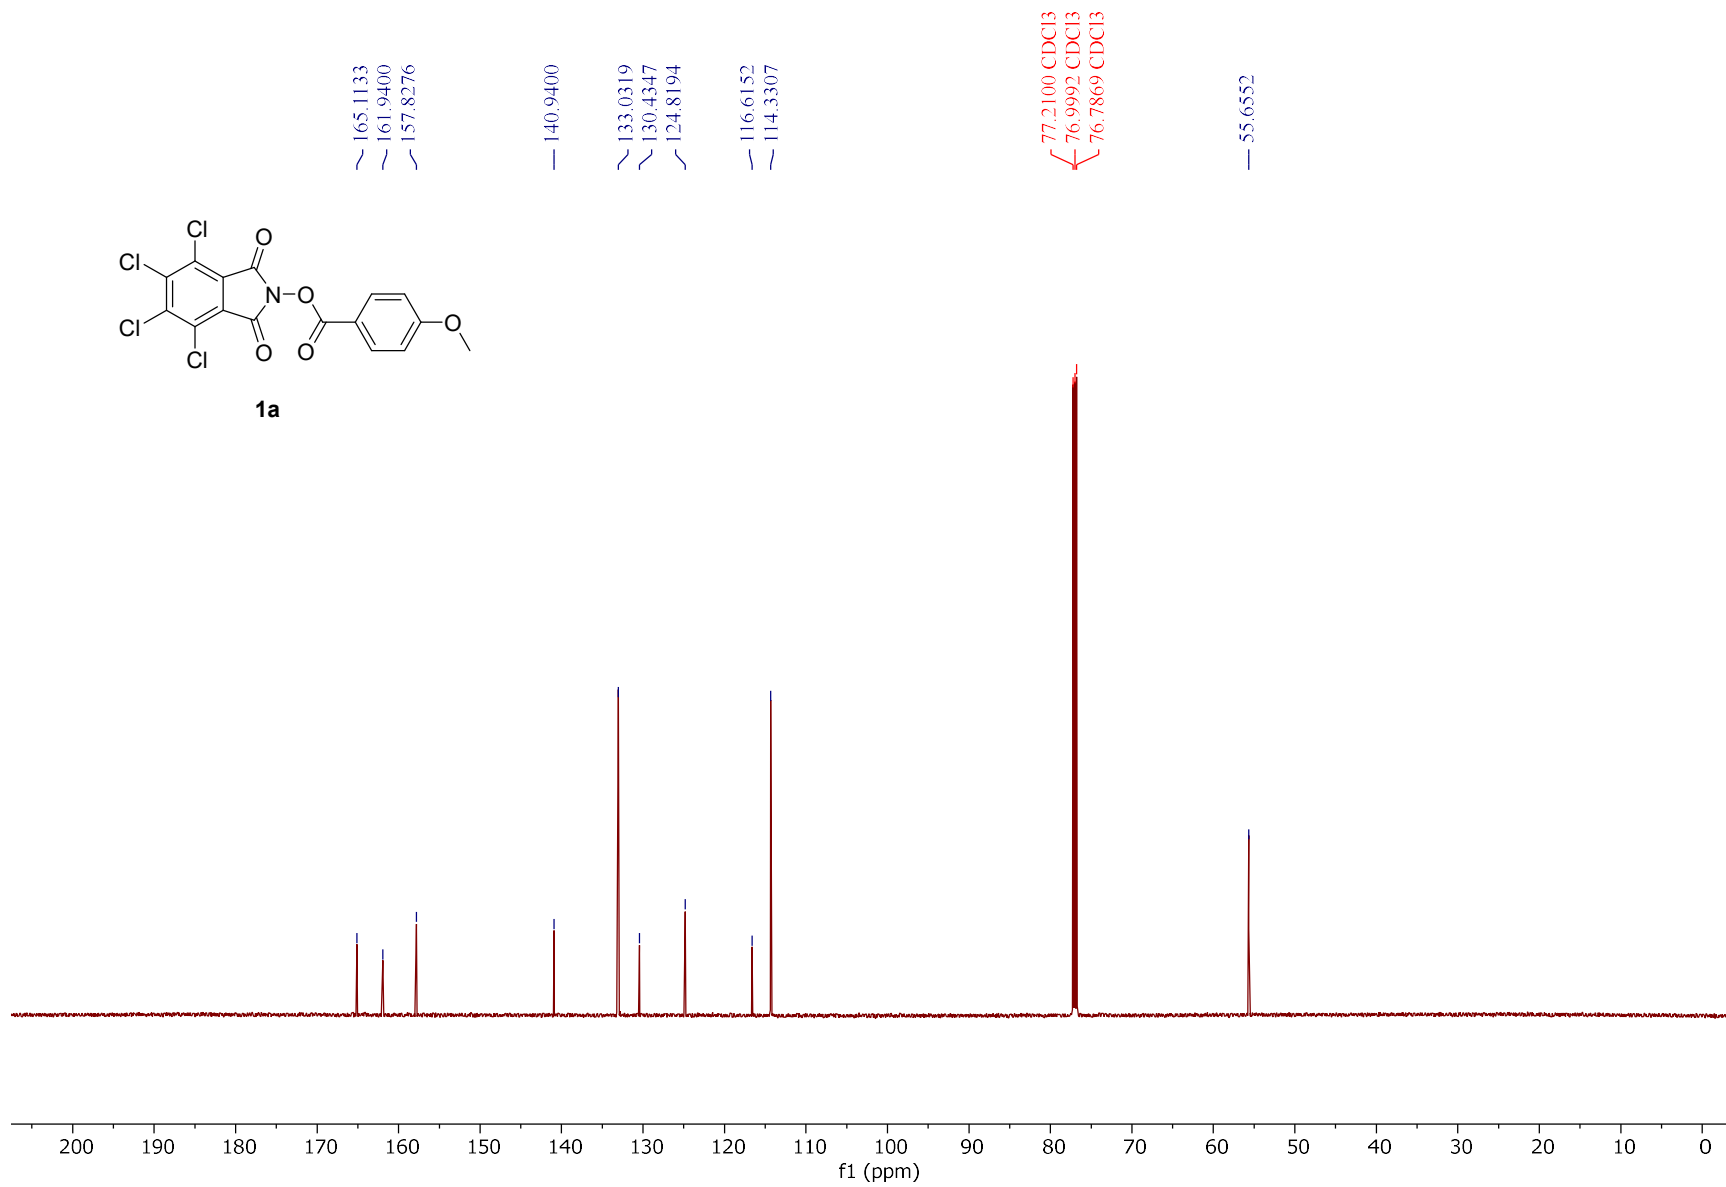

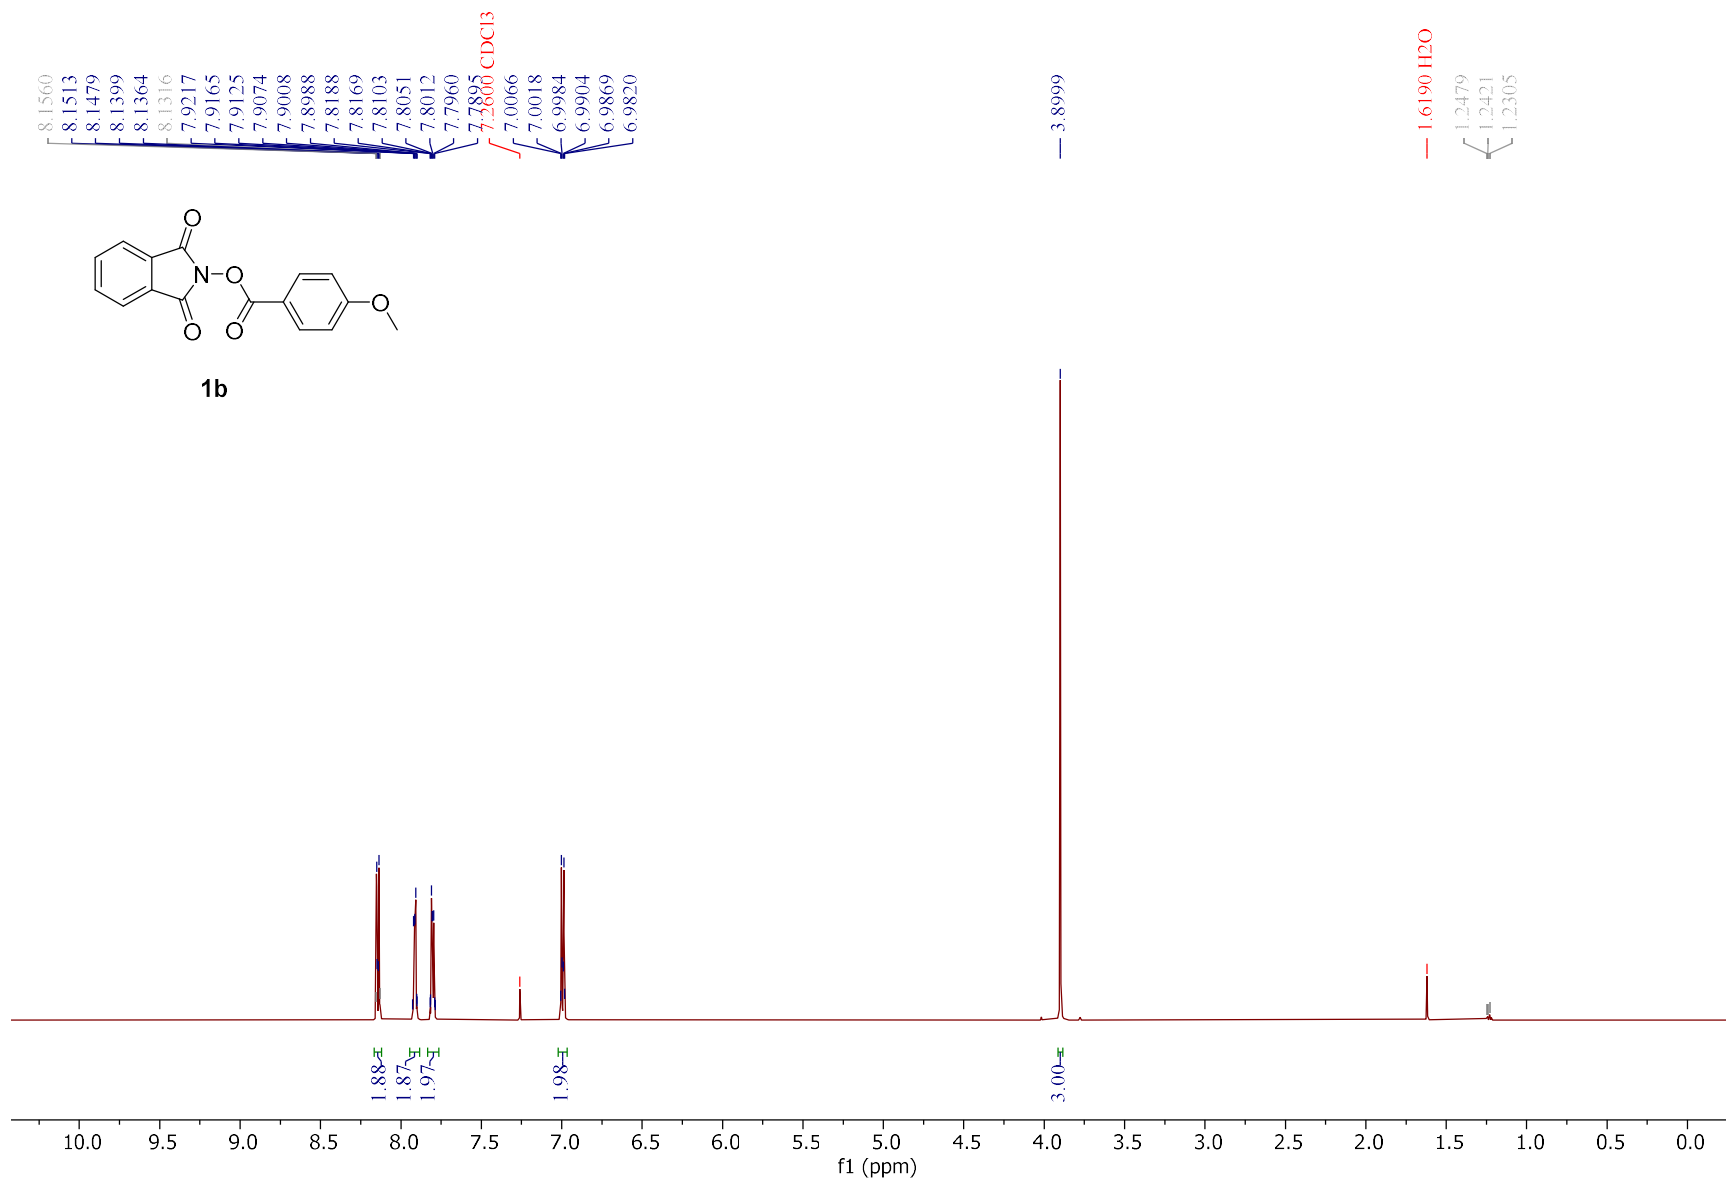

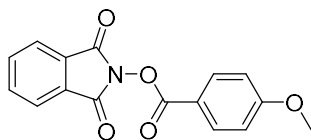

**1b**

164.8523  
162.3756  
162.2343

134.7077  
132.9067  
129.0040  
123.9376

117.1851  
114.1806

77.2094  
76.9979  
76.7864

55.5928

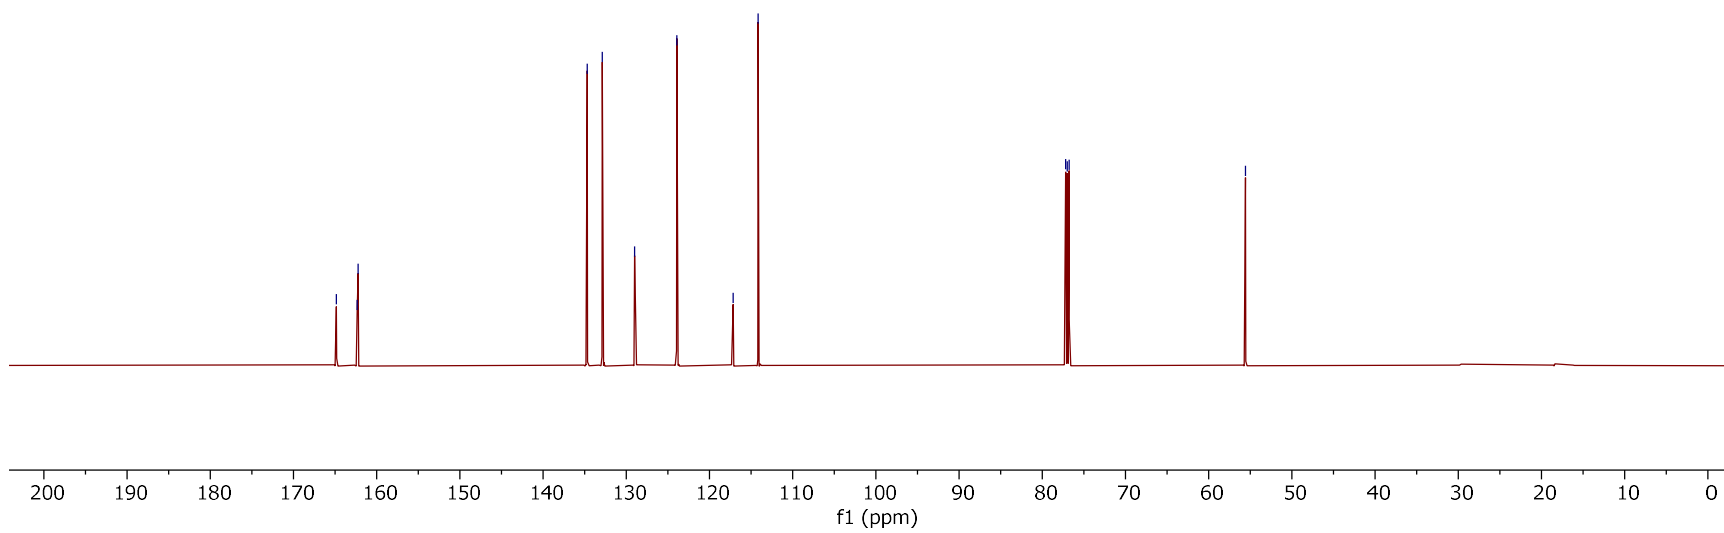

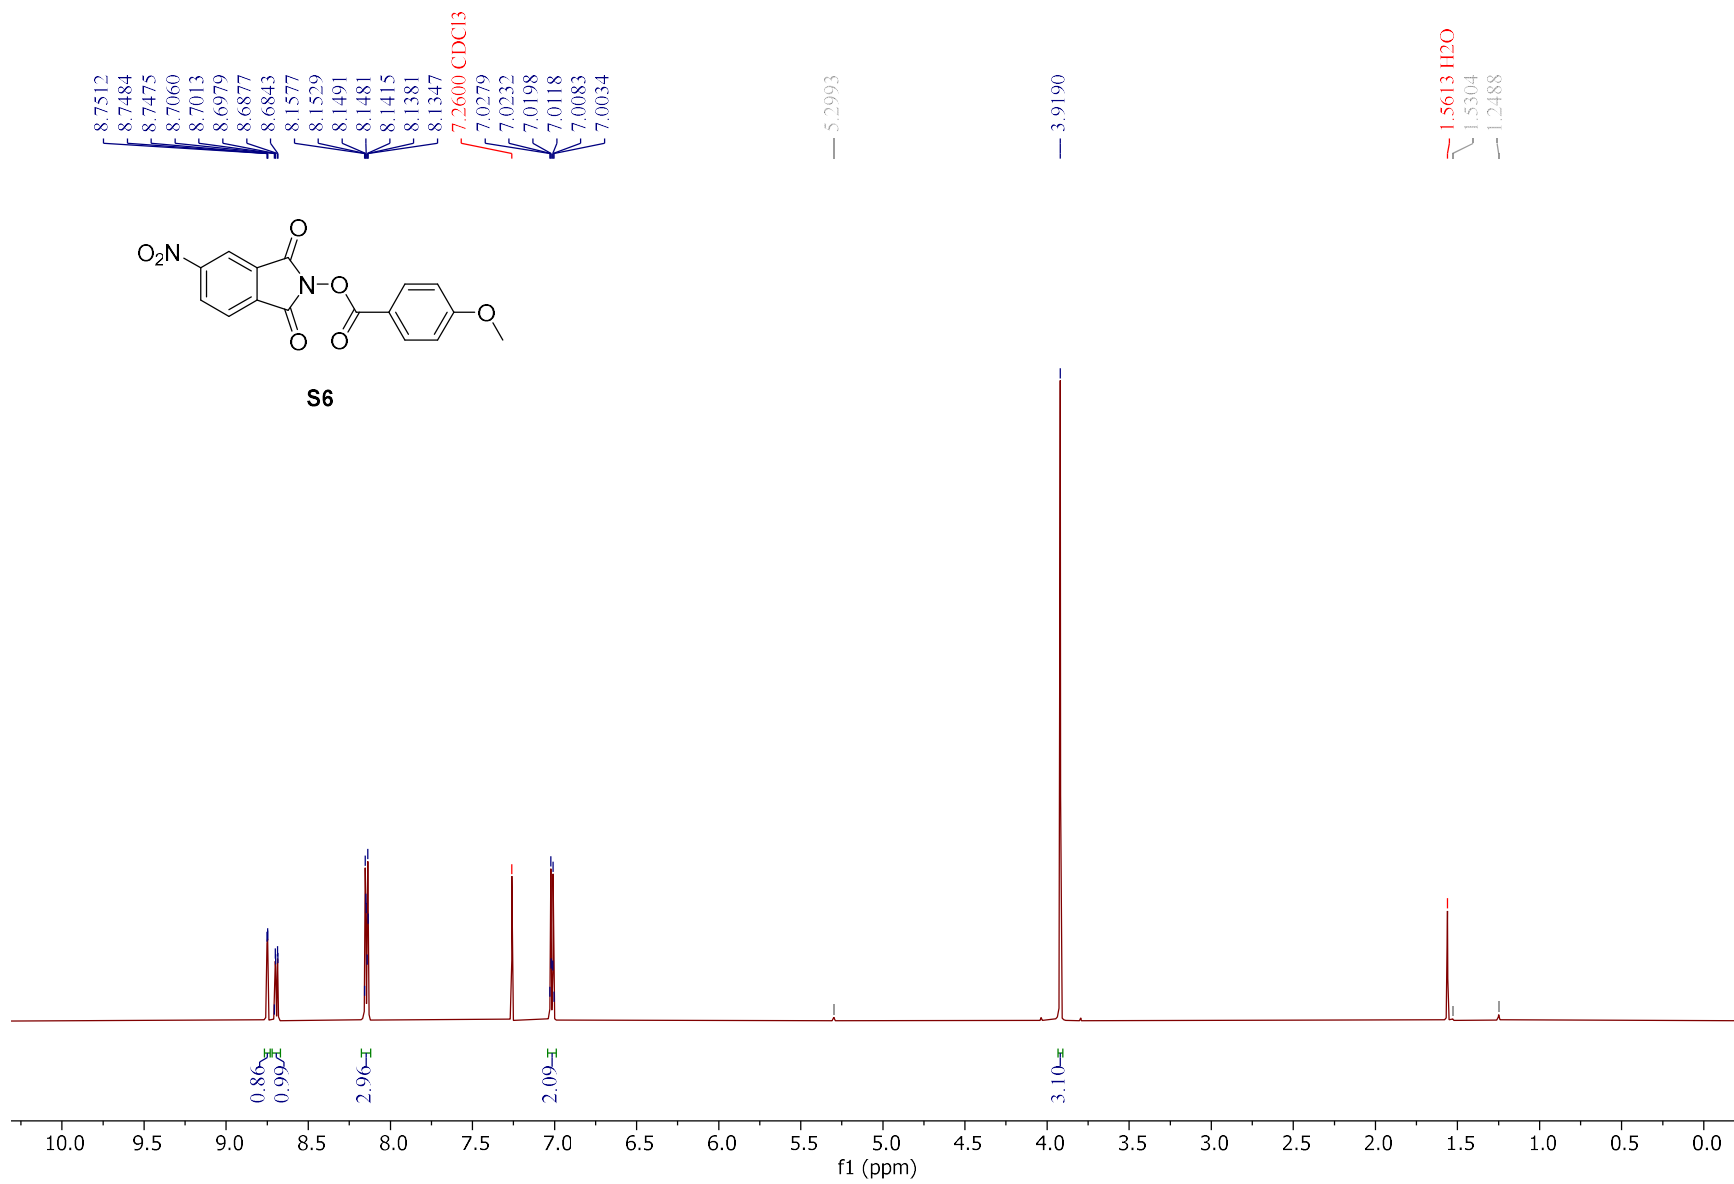

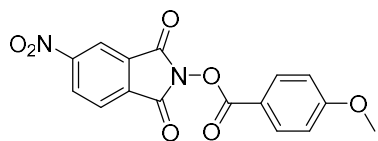

S6

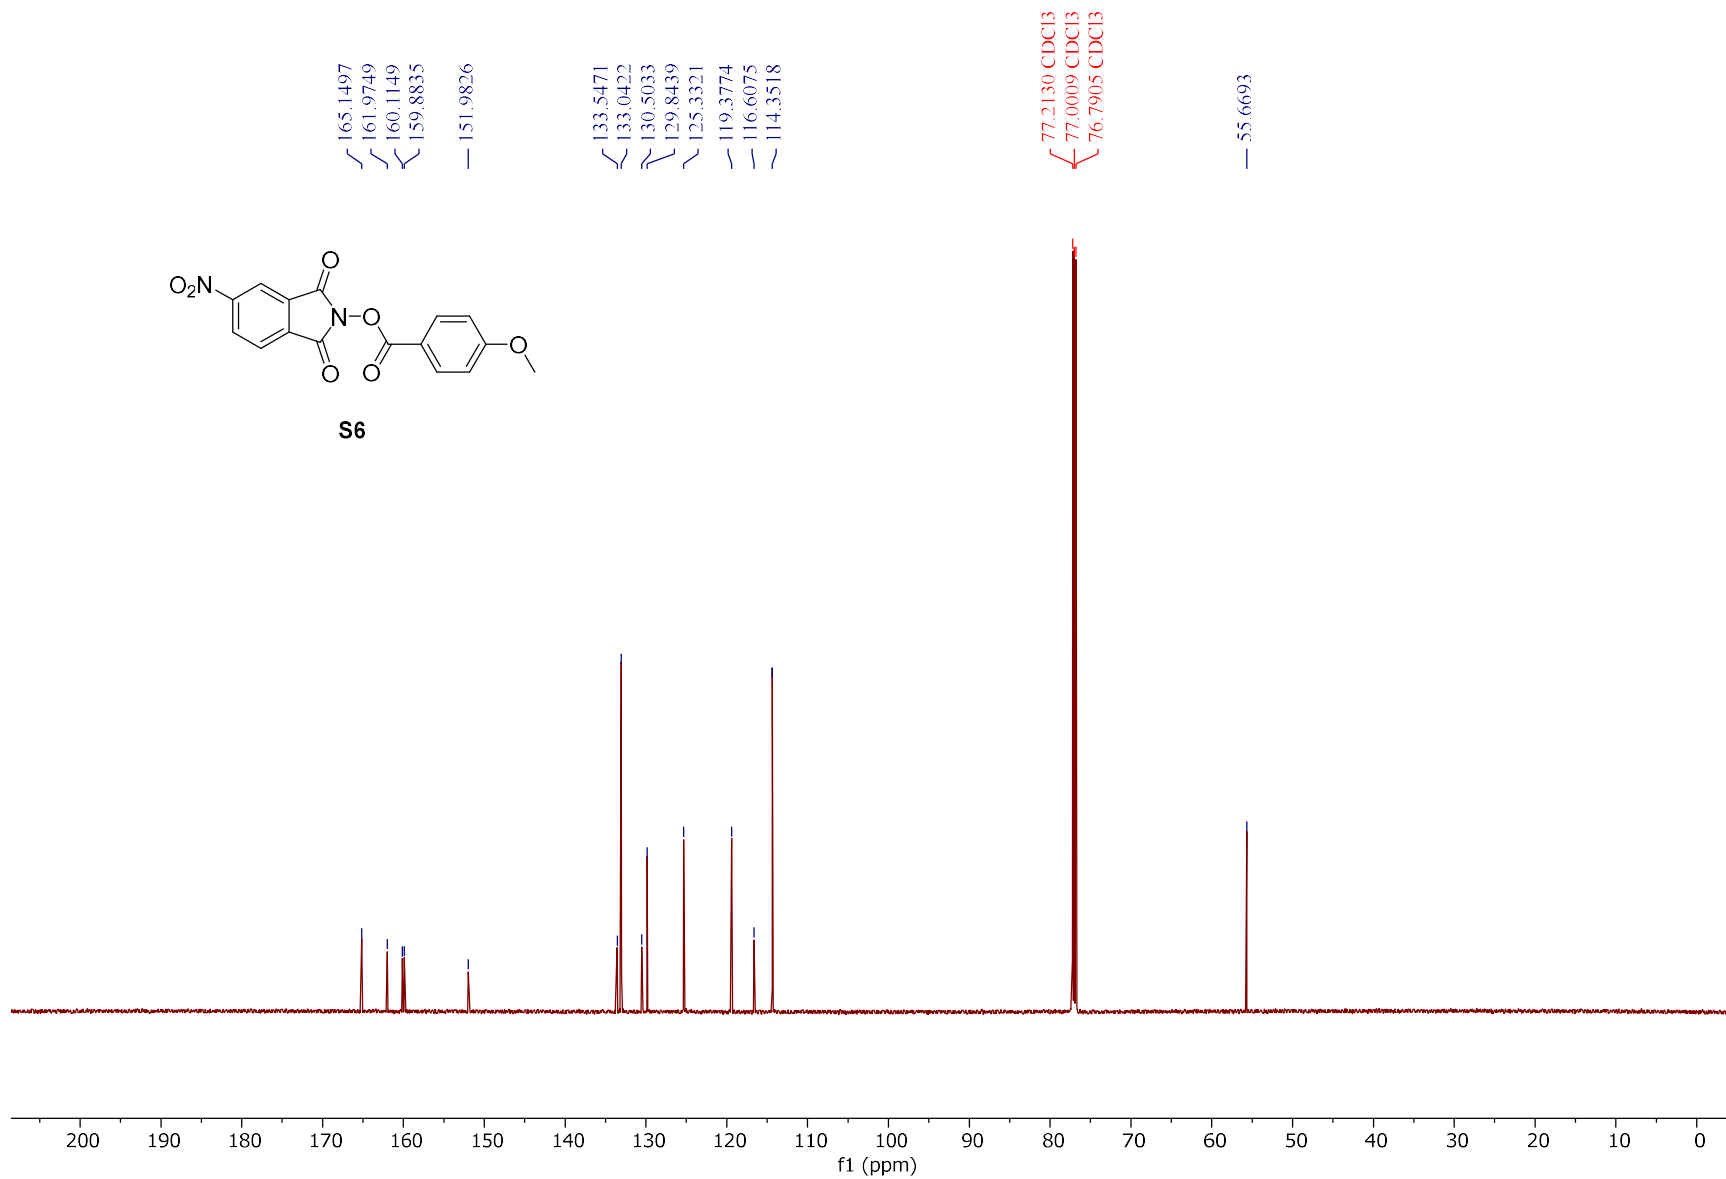

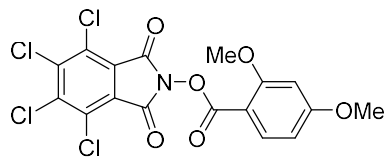

S8

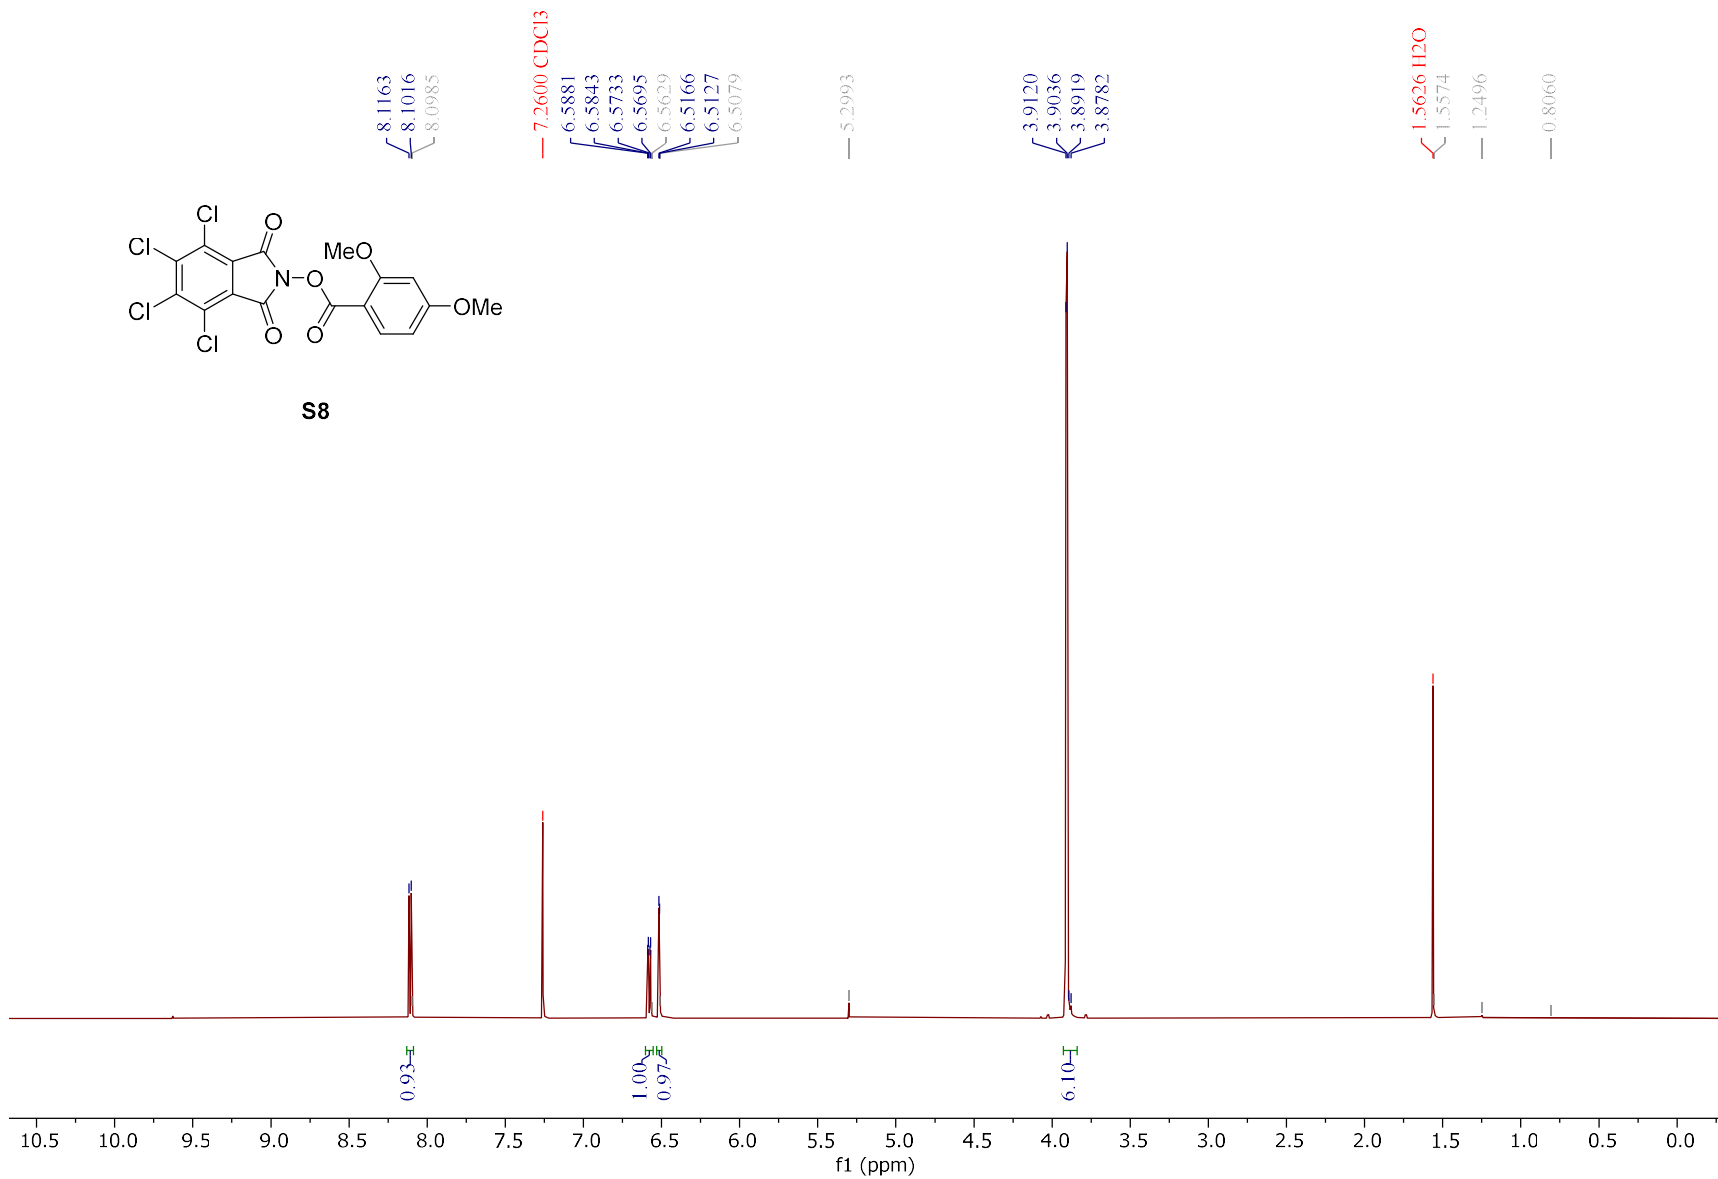



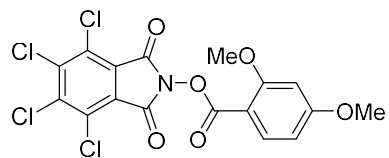

S8

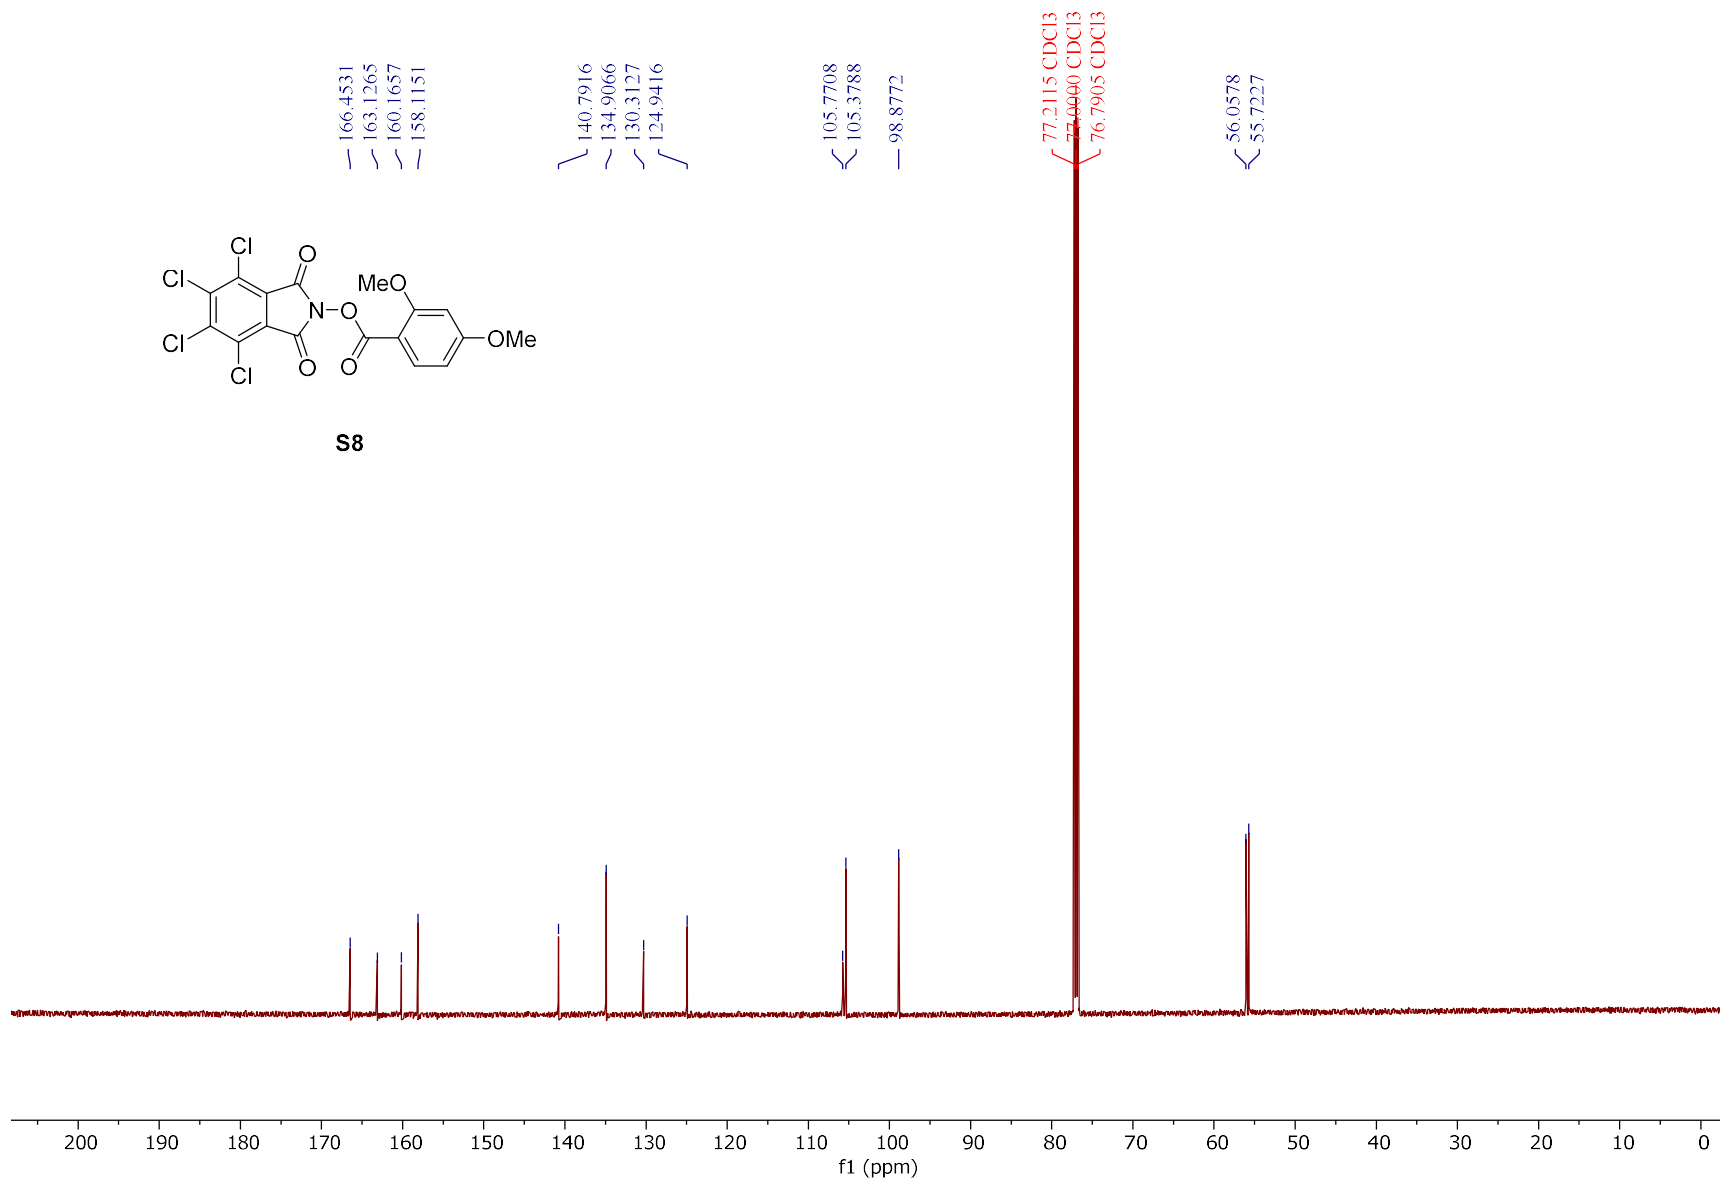

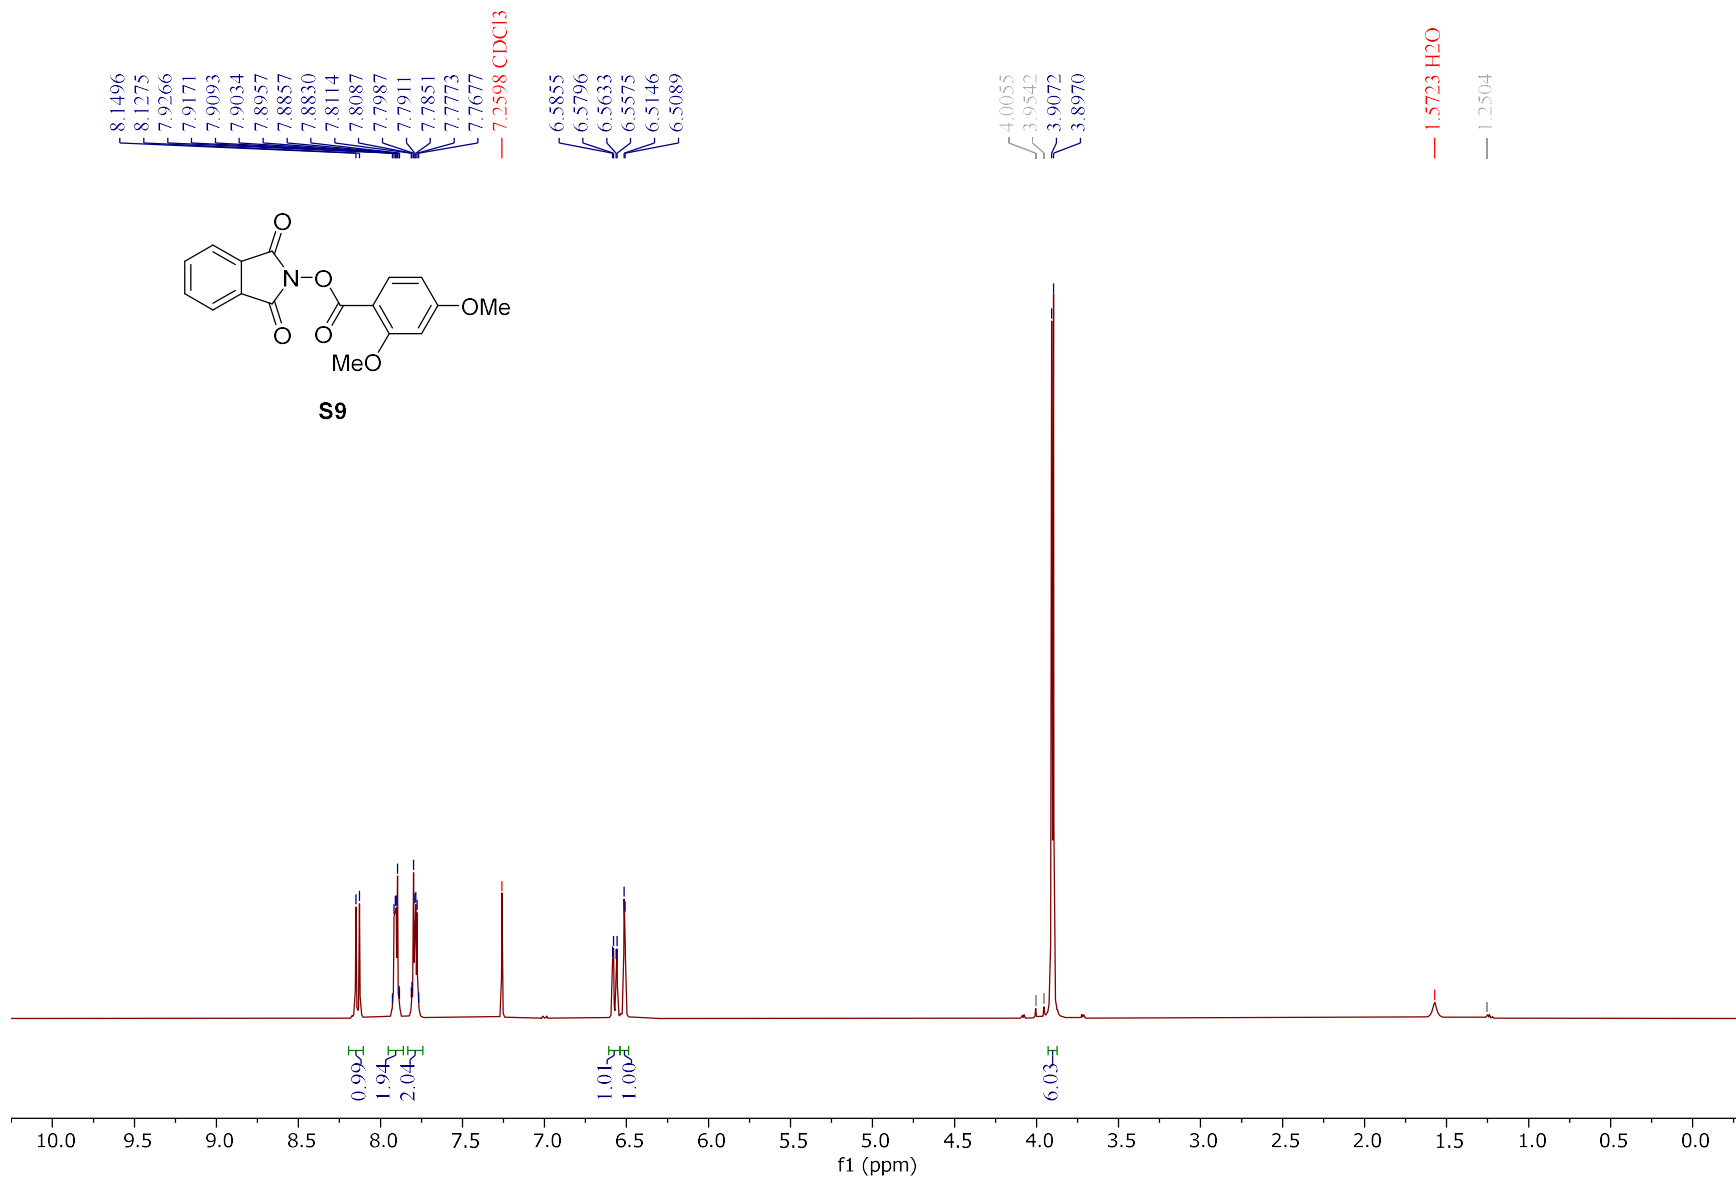

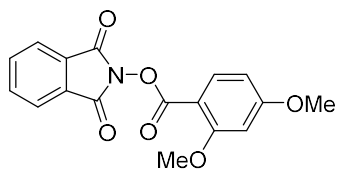

S9

166.2160  
163.0224  
162.5889  
160.6633

134.9327  
134.6091  
129.2300  
123.8760

106.4499  
105.2606  
98.9133

77.3501 CDCl<sub>3</sub>  
77.0328 CDCl<sub>3</sub>  
76.7146 CDCl<sub>3</sub>

56.0587  
55.7053

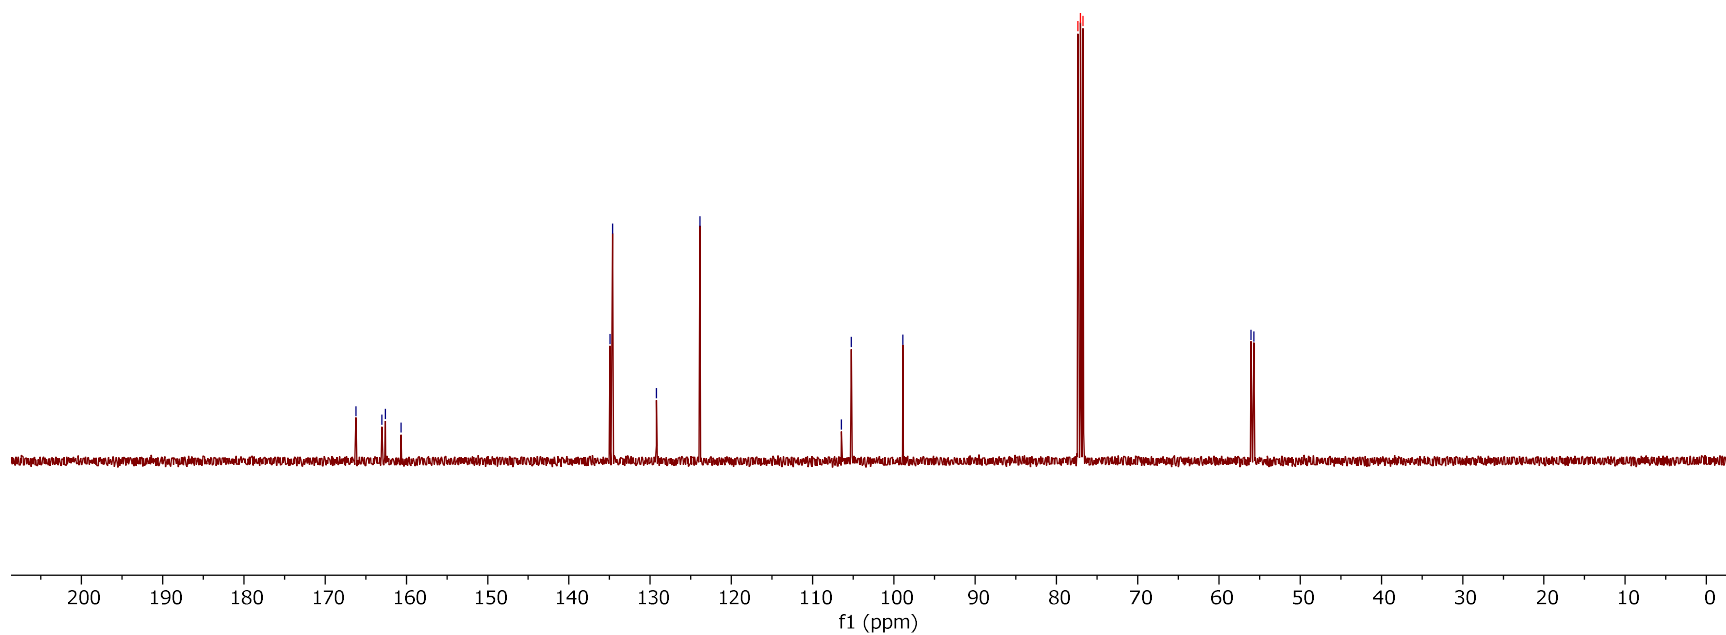

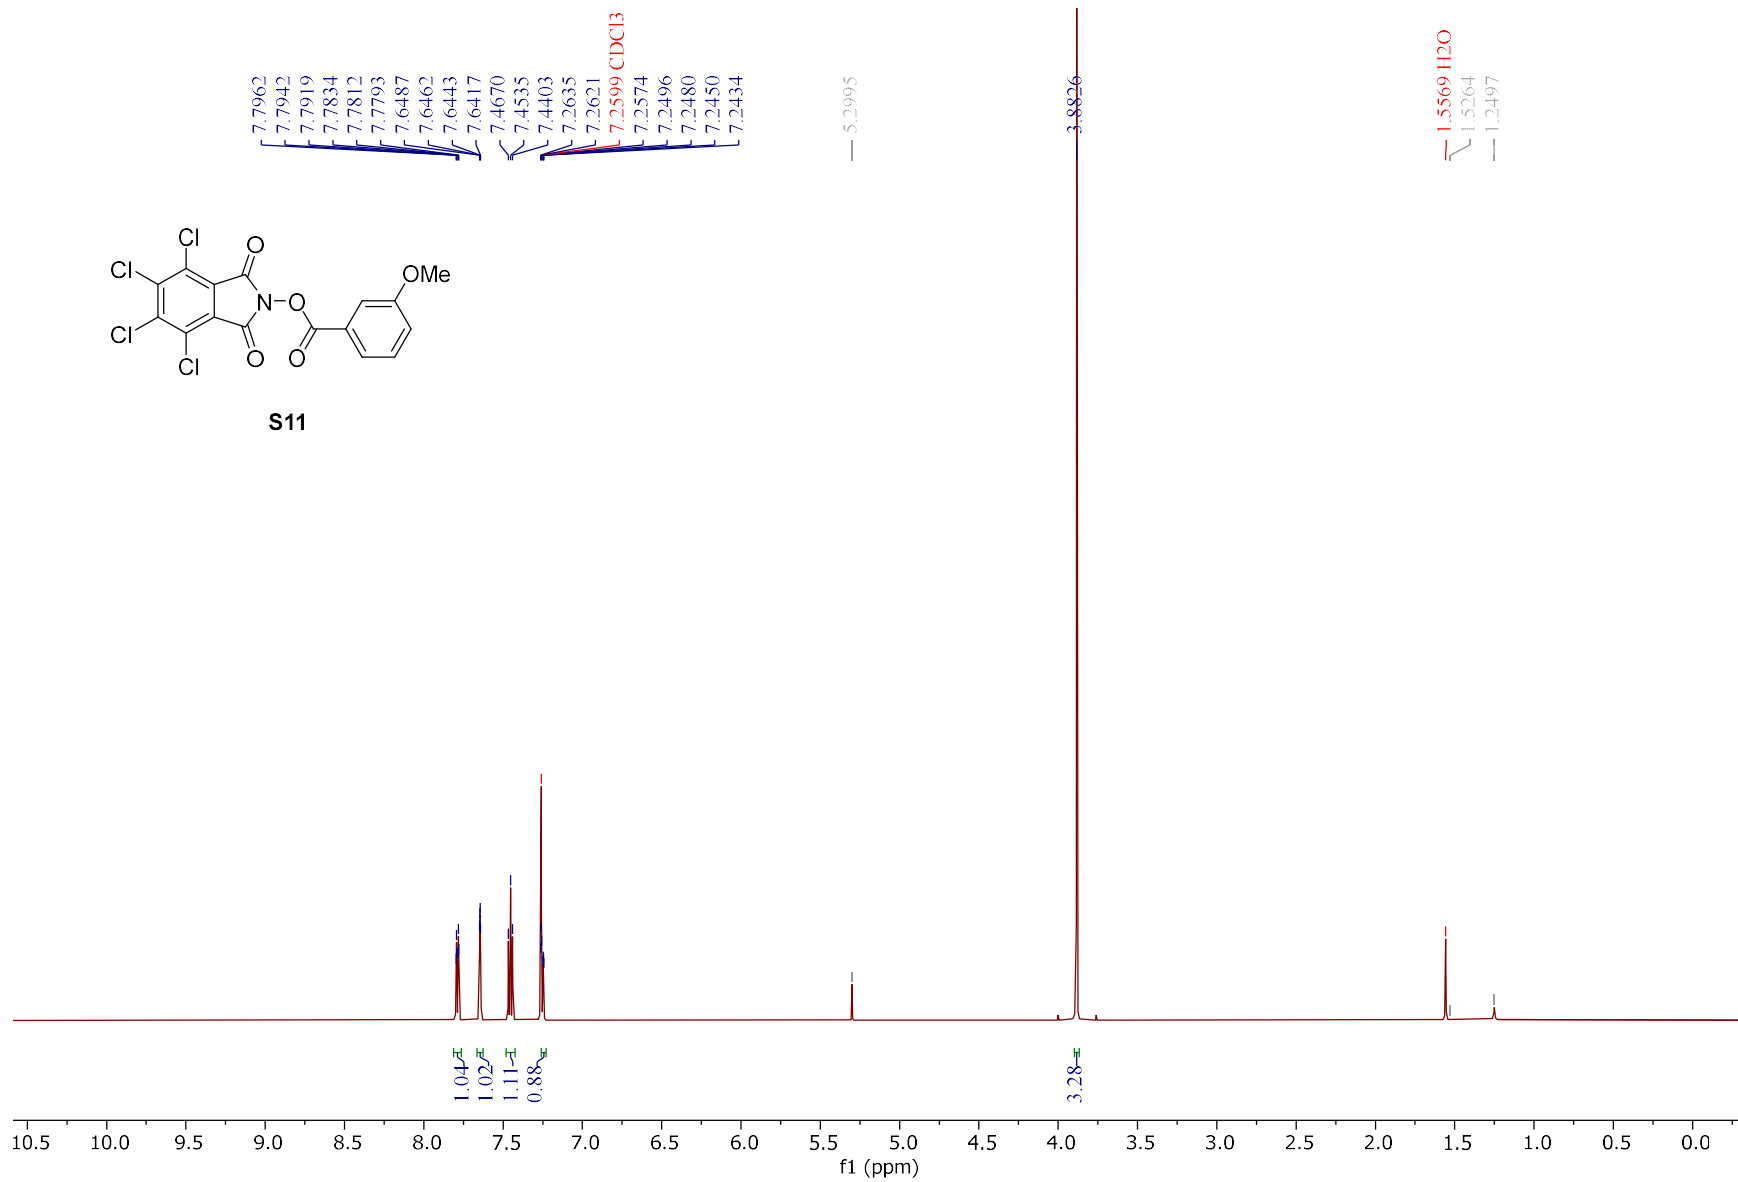

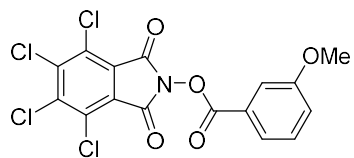

S11

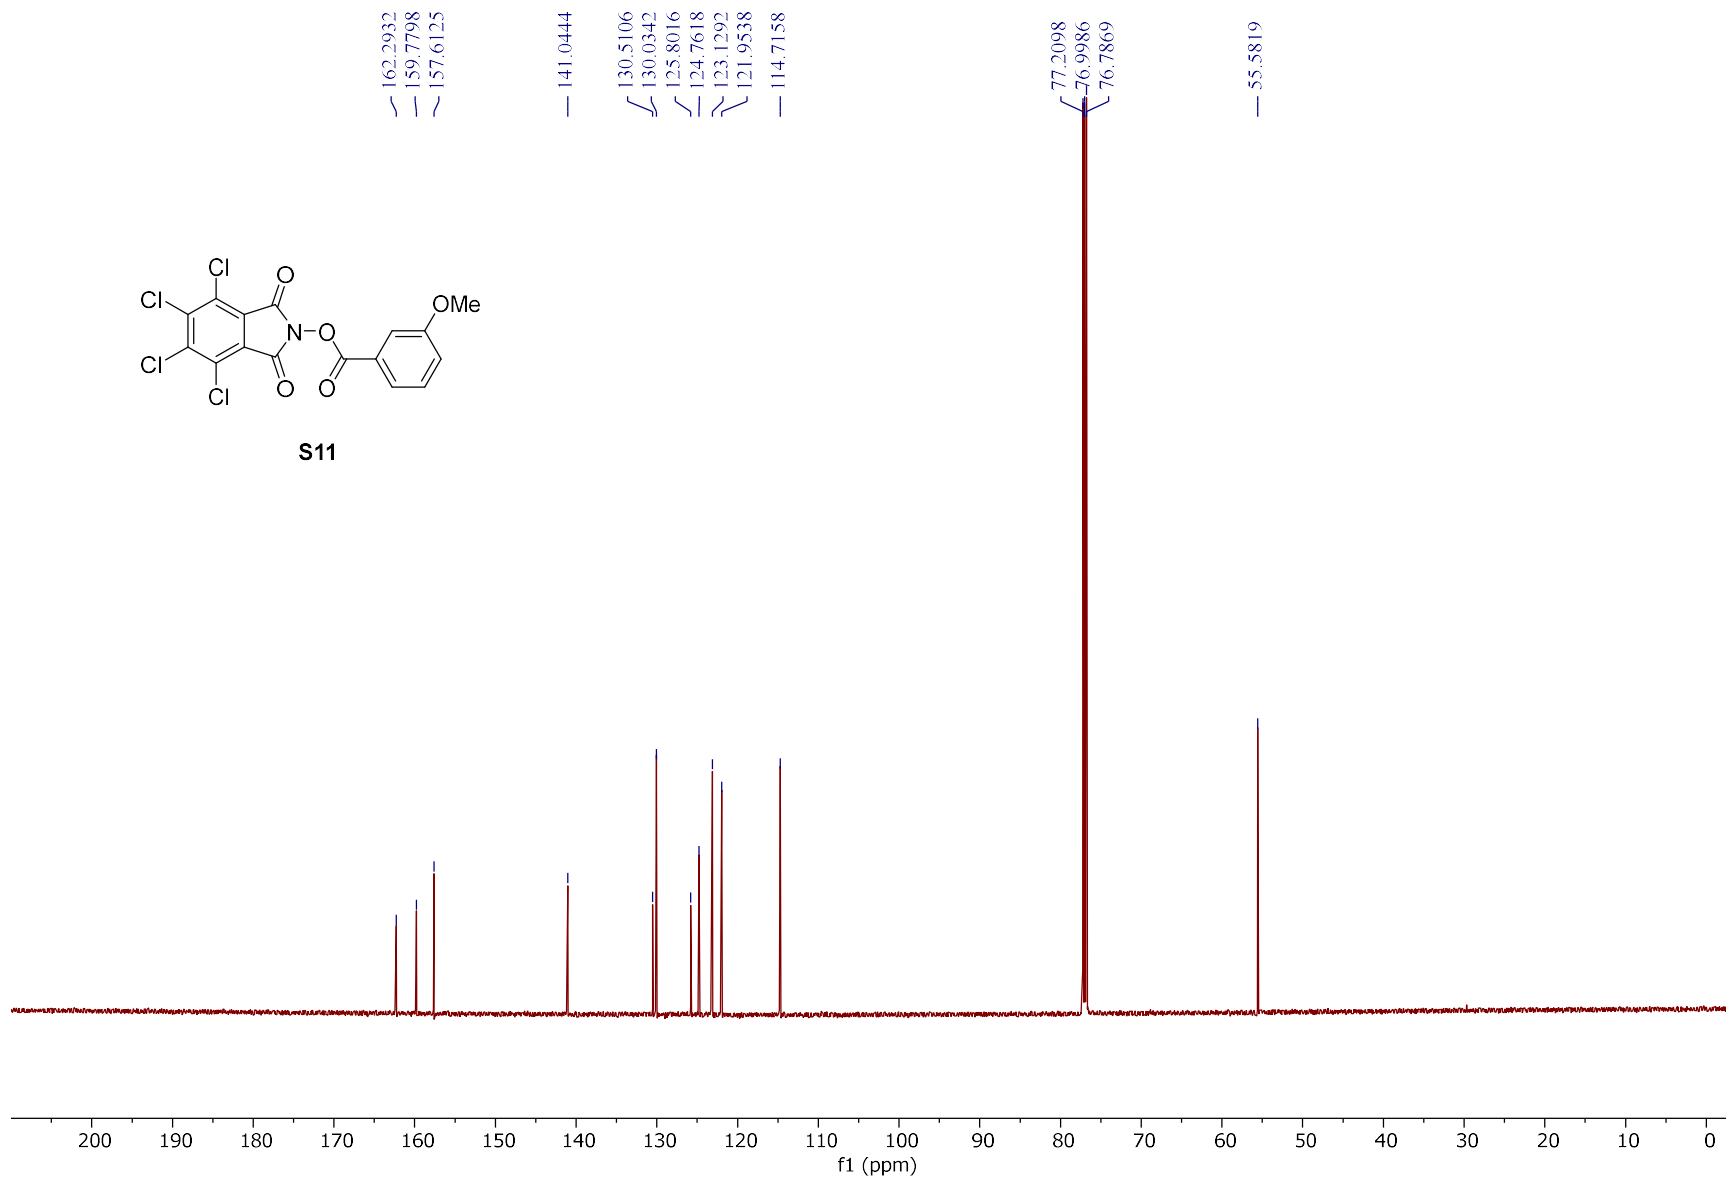

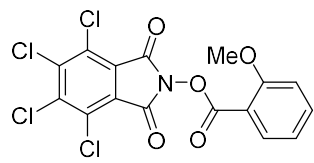

S13

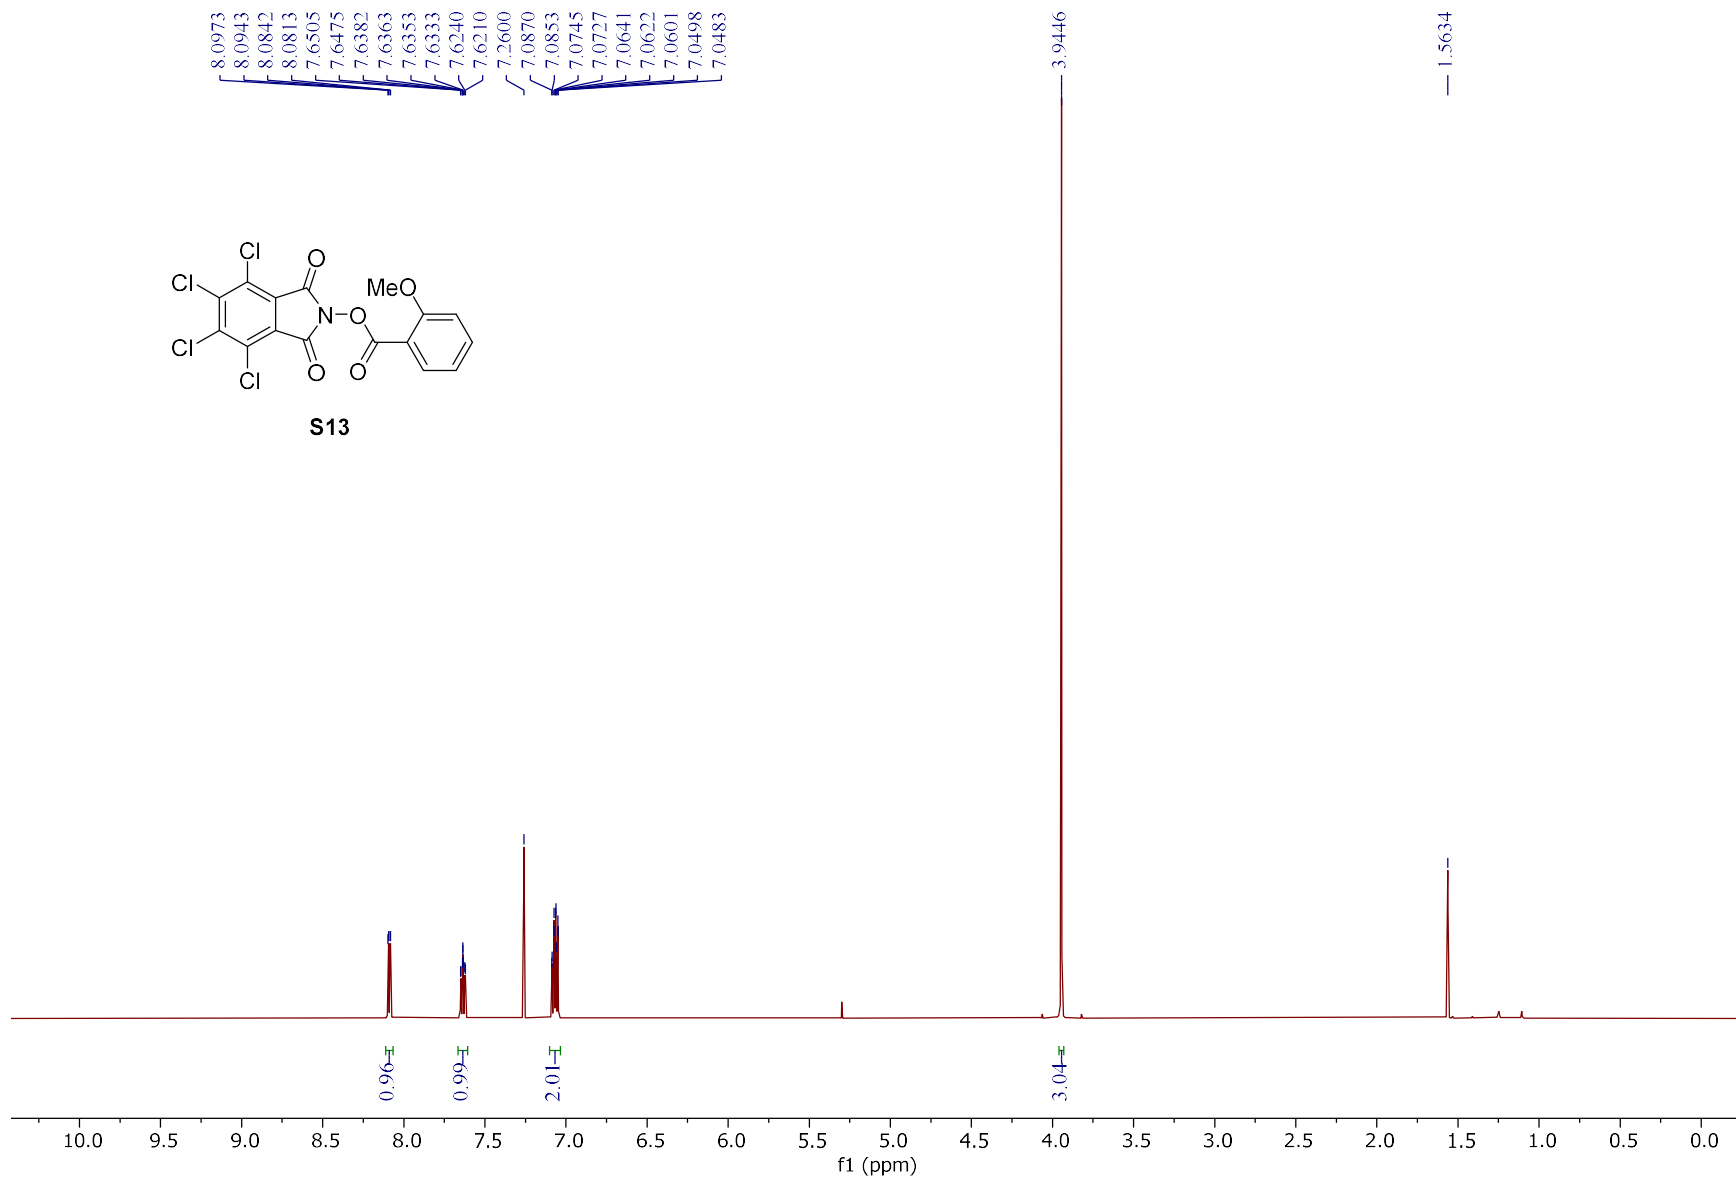

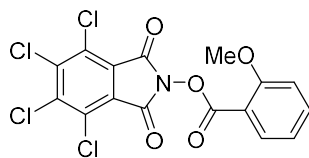

S13

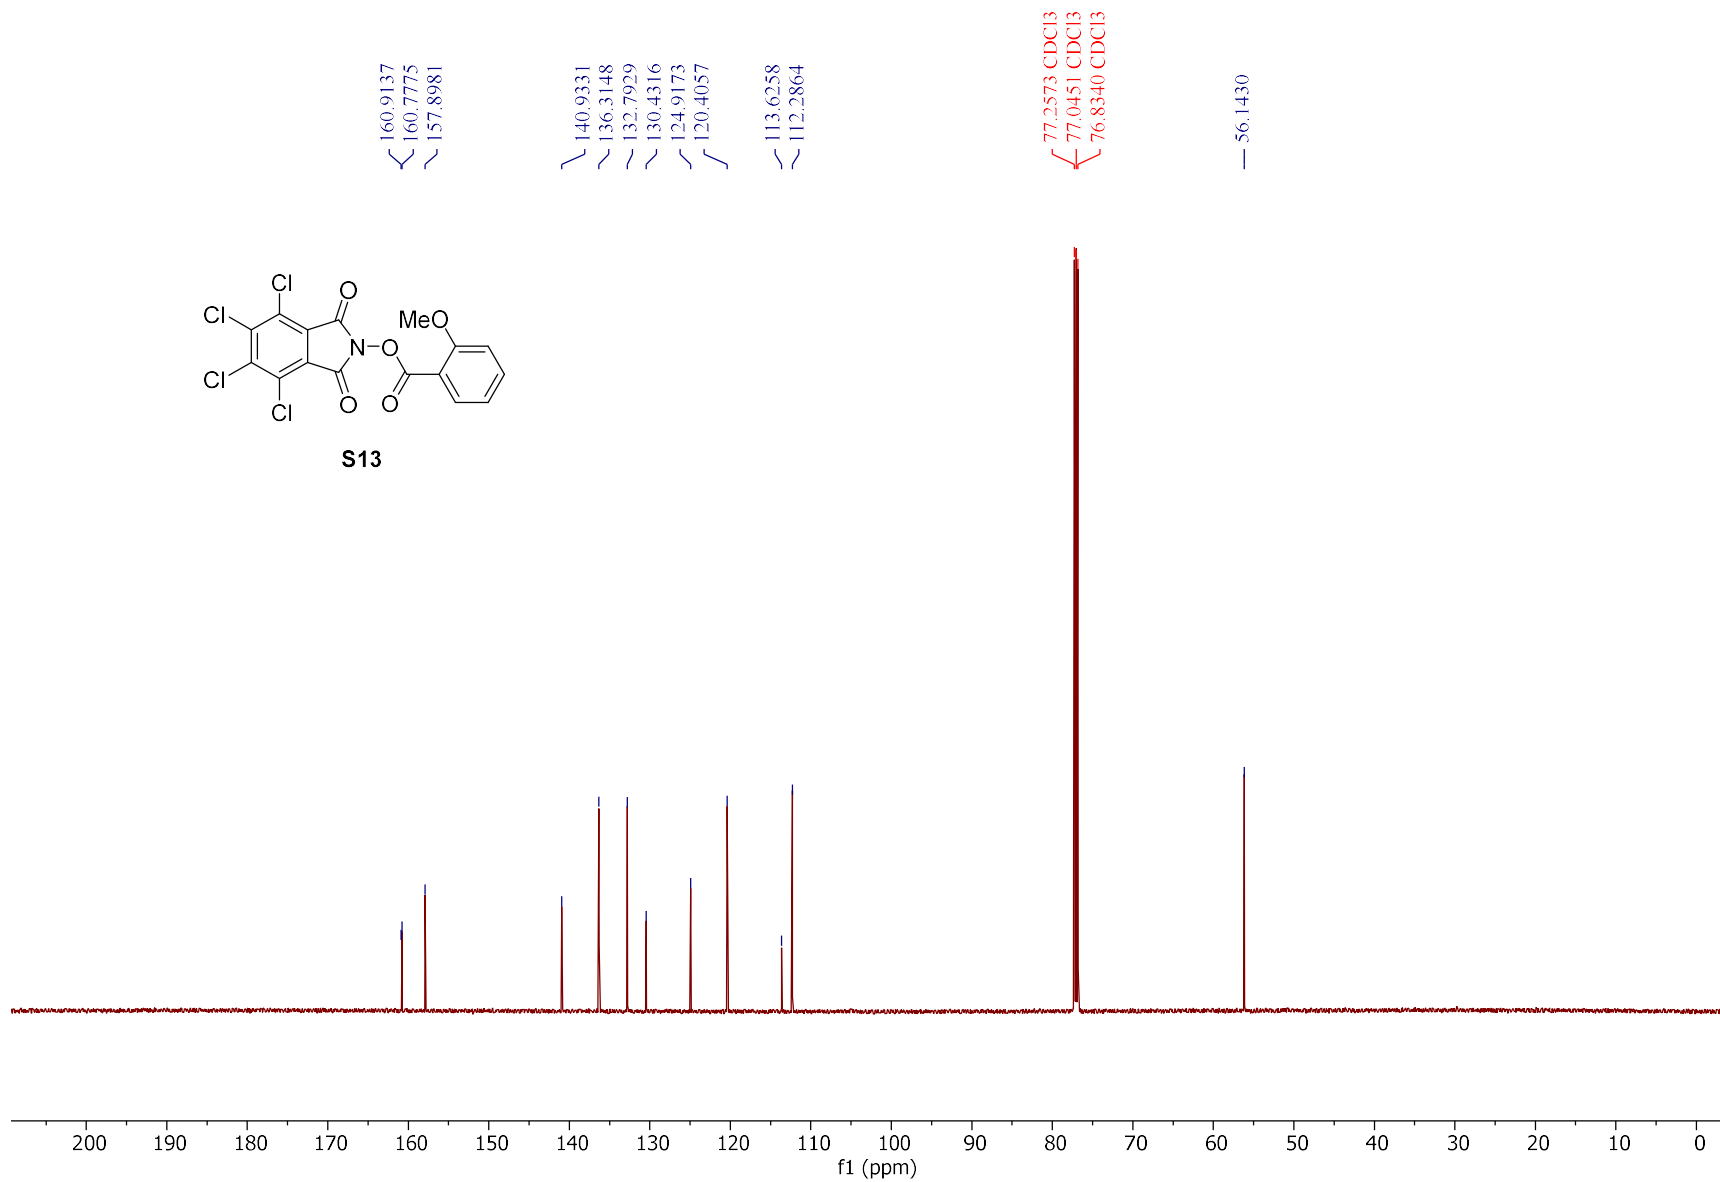

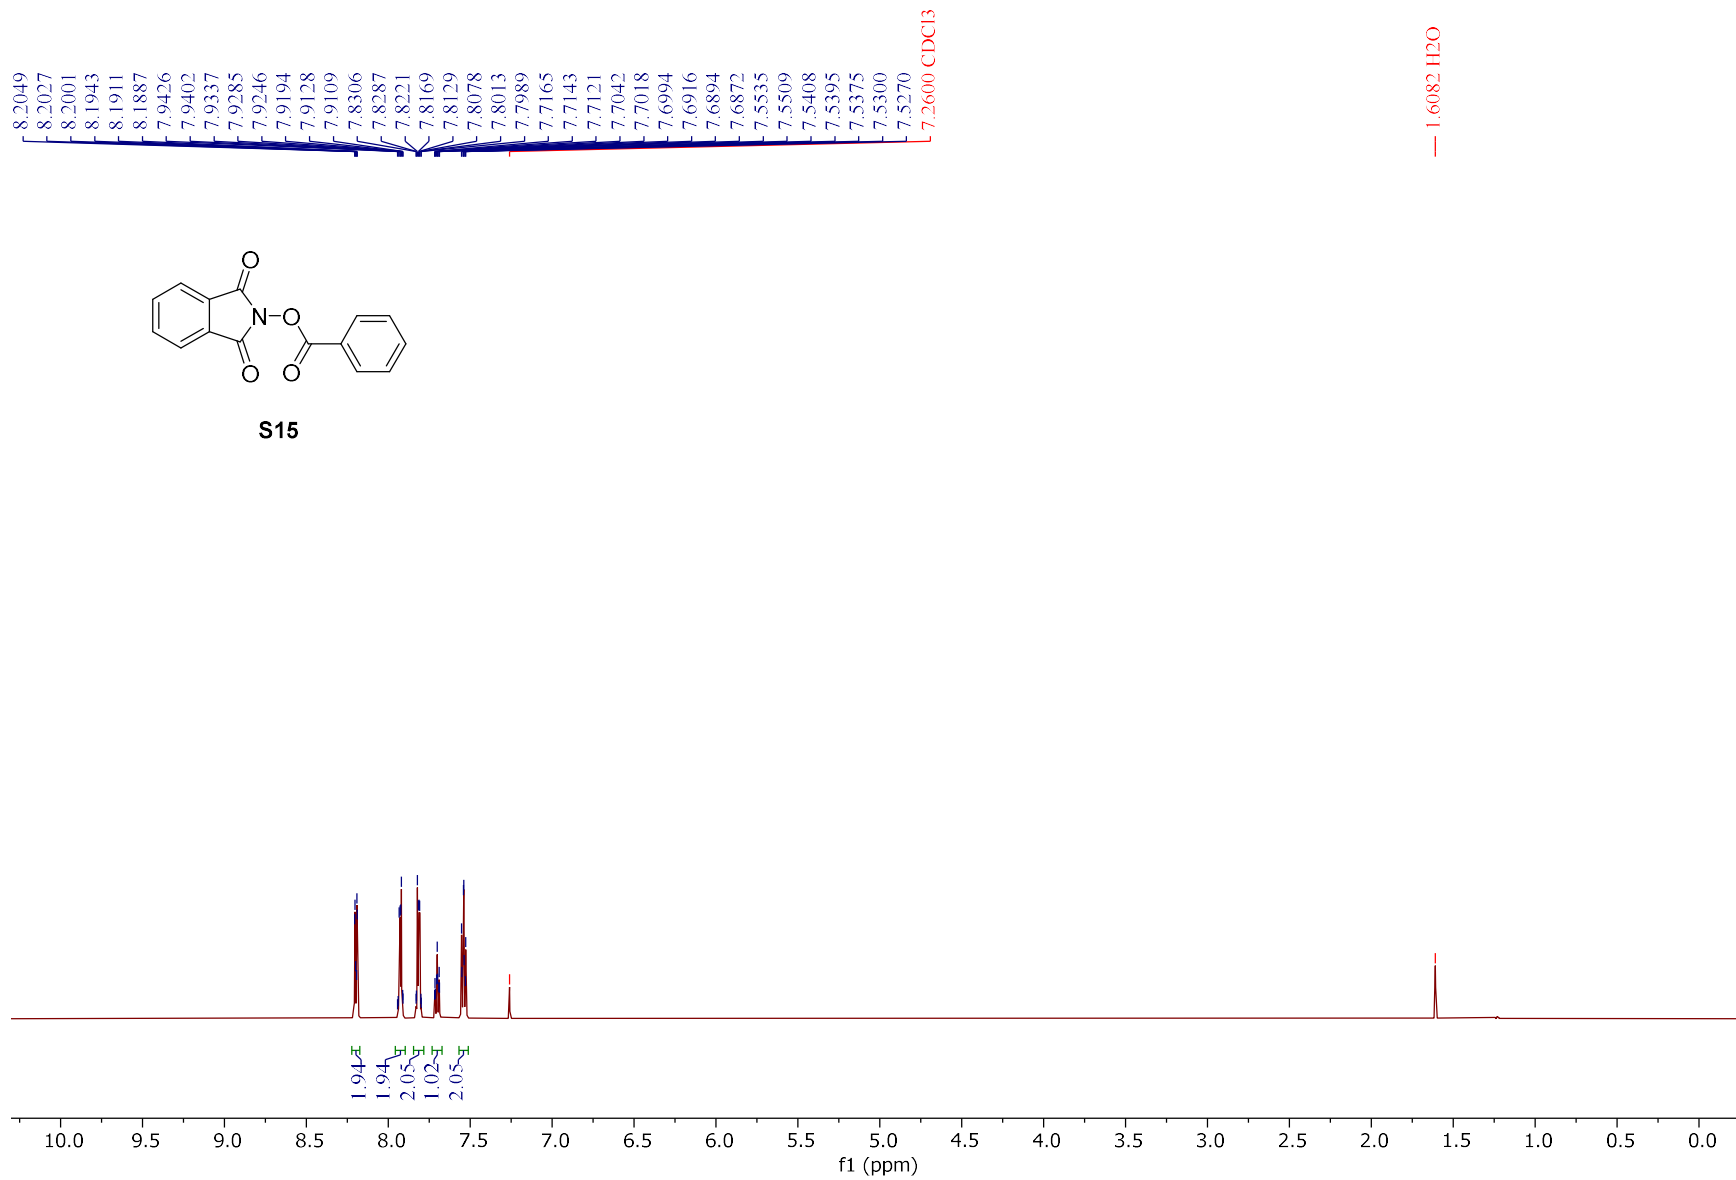



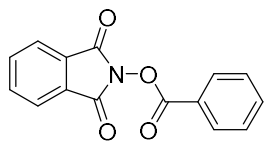

S15

162.7802  
162.0445

134.8762  
134.7789  
130.6192  
128.9676  
128.8487  
125.2312  
124.0032

77.2095 CDCl<sub>3</sub>  
76.9966 CDCl<sub>3</sub>  
76.7870 CDCl<sub>3</sub>

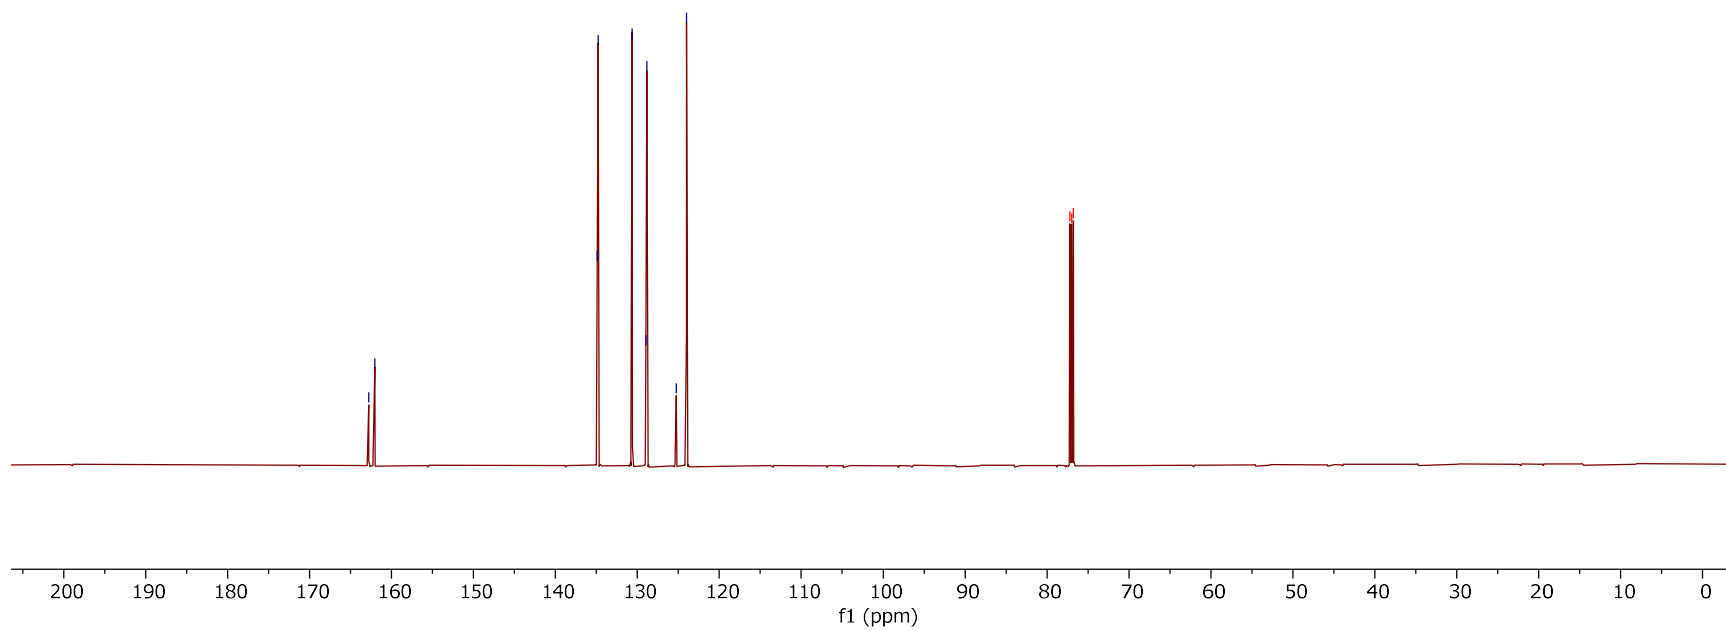

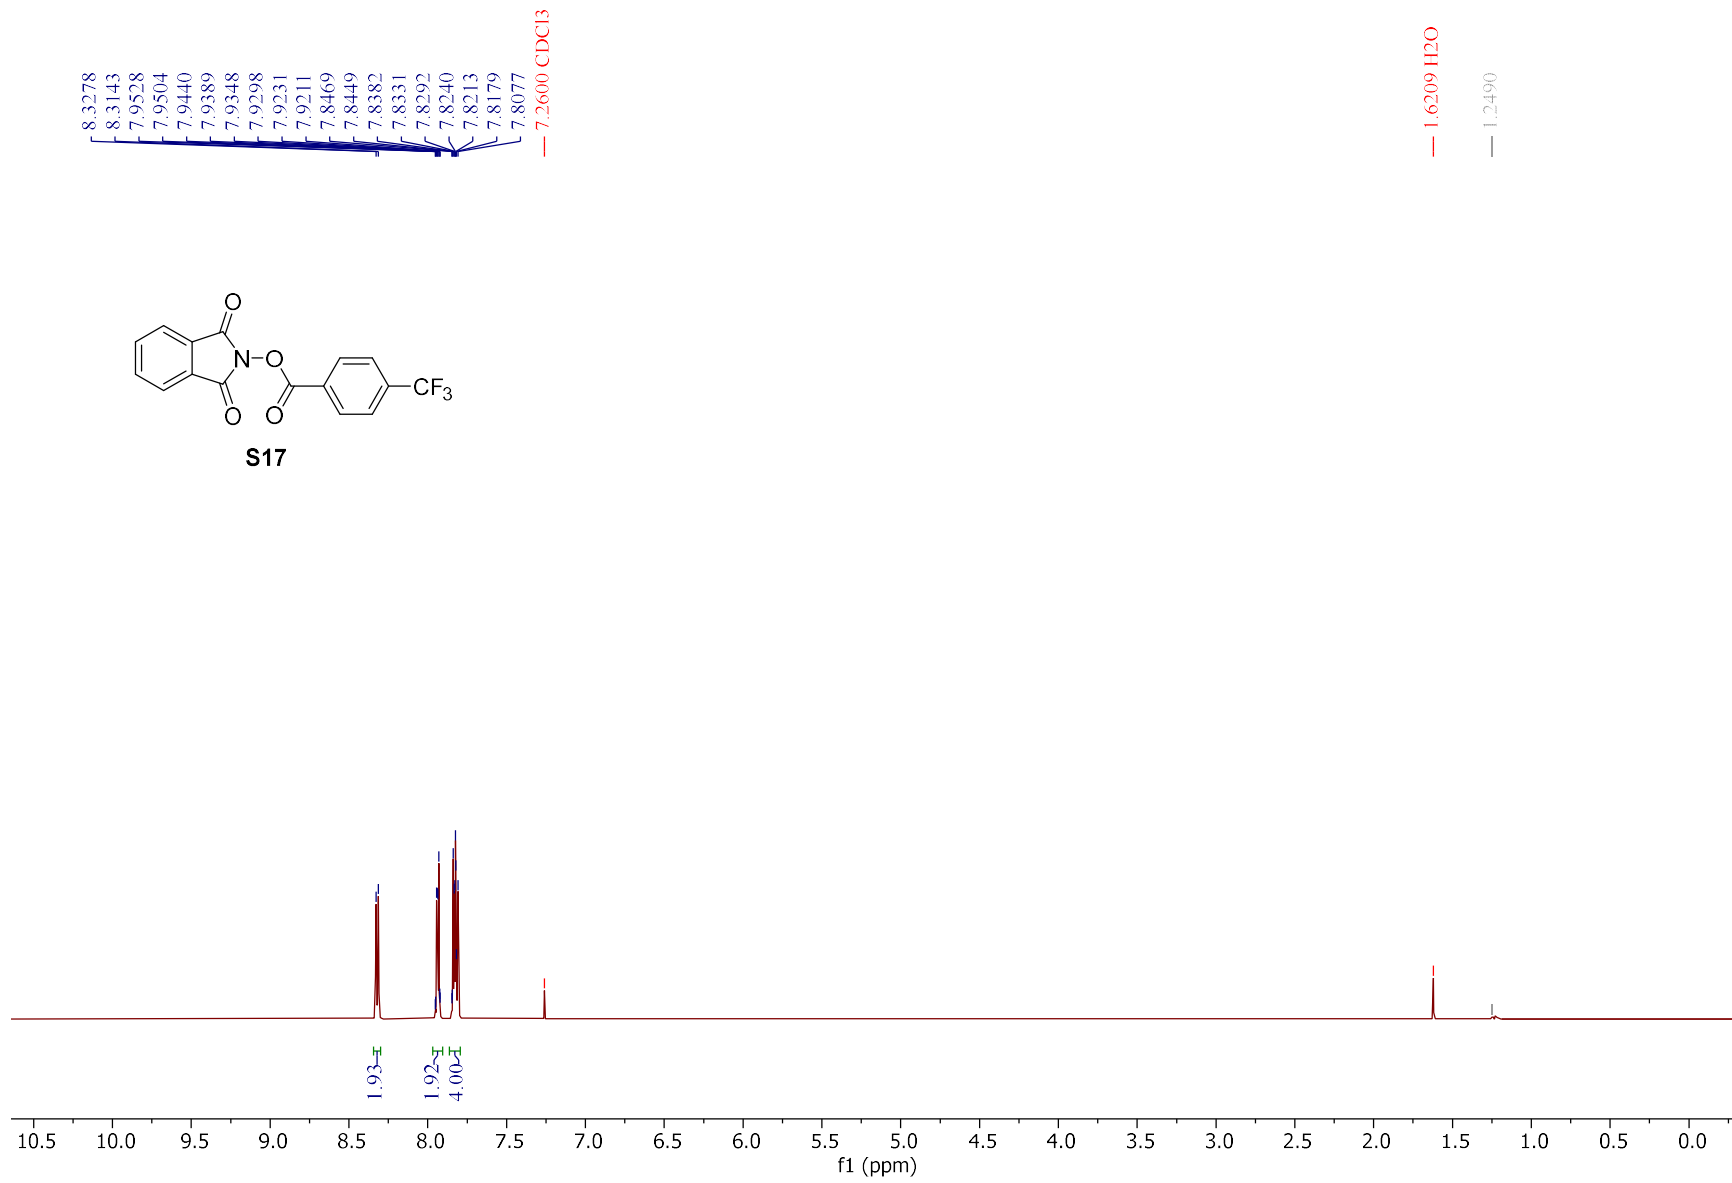

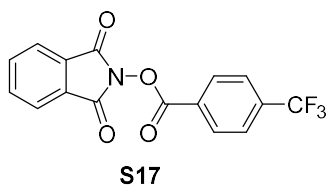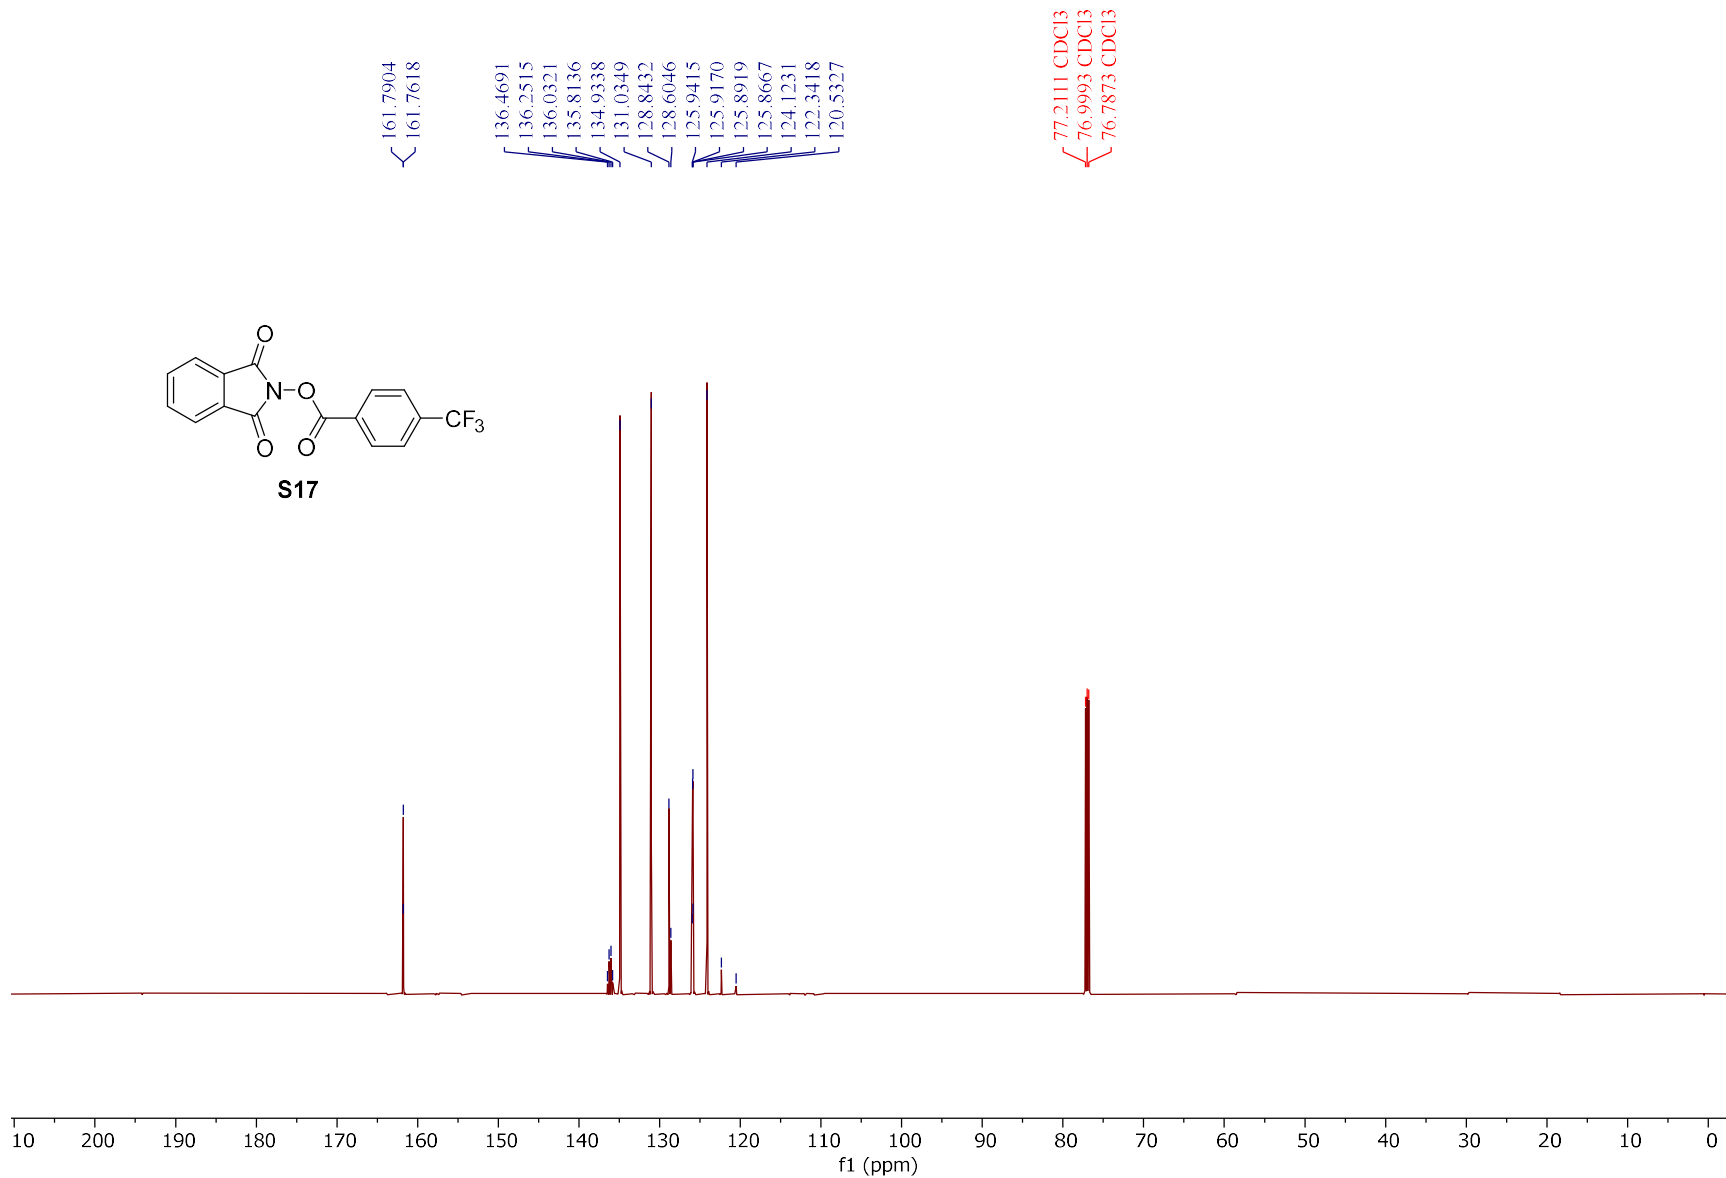

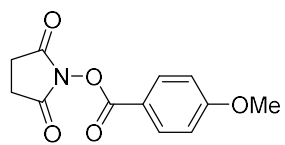

S19

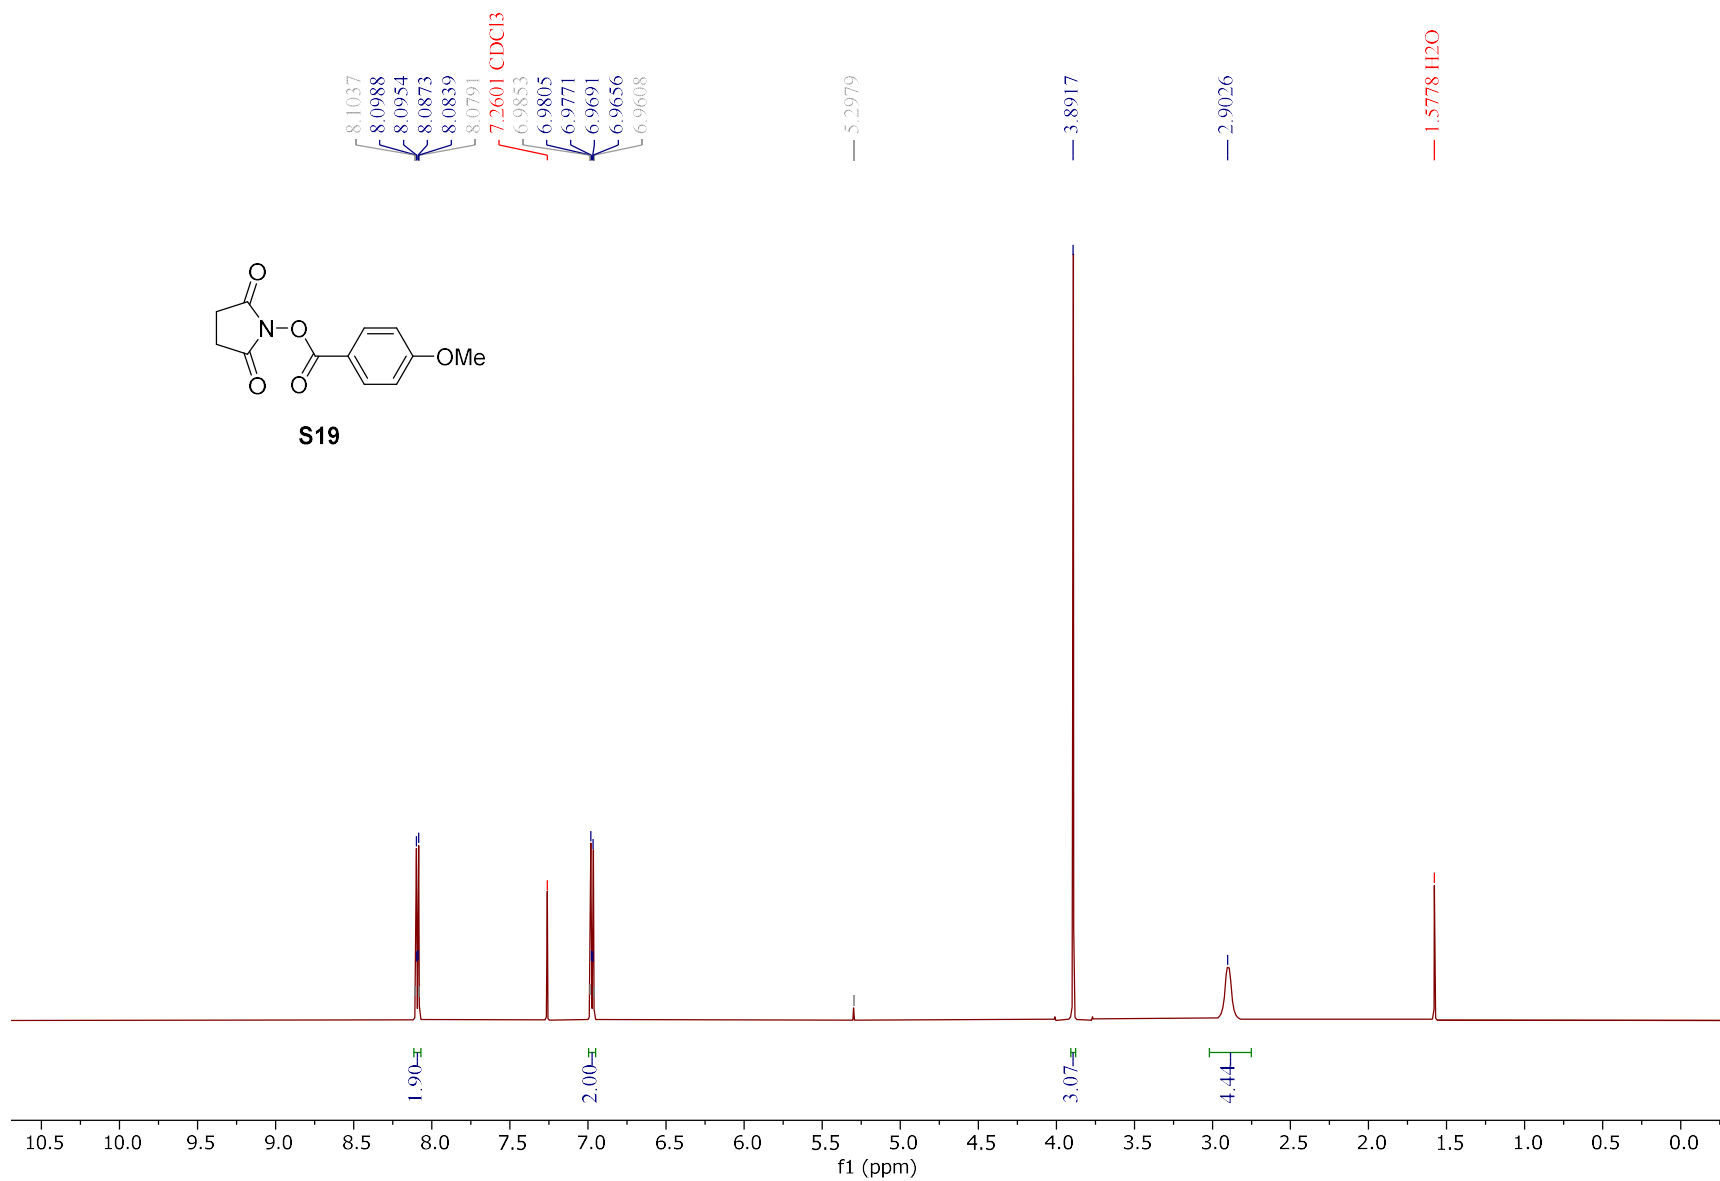

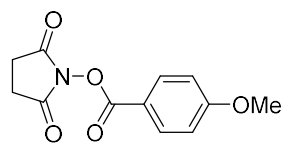

S19

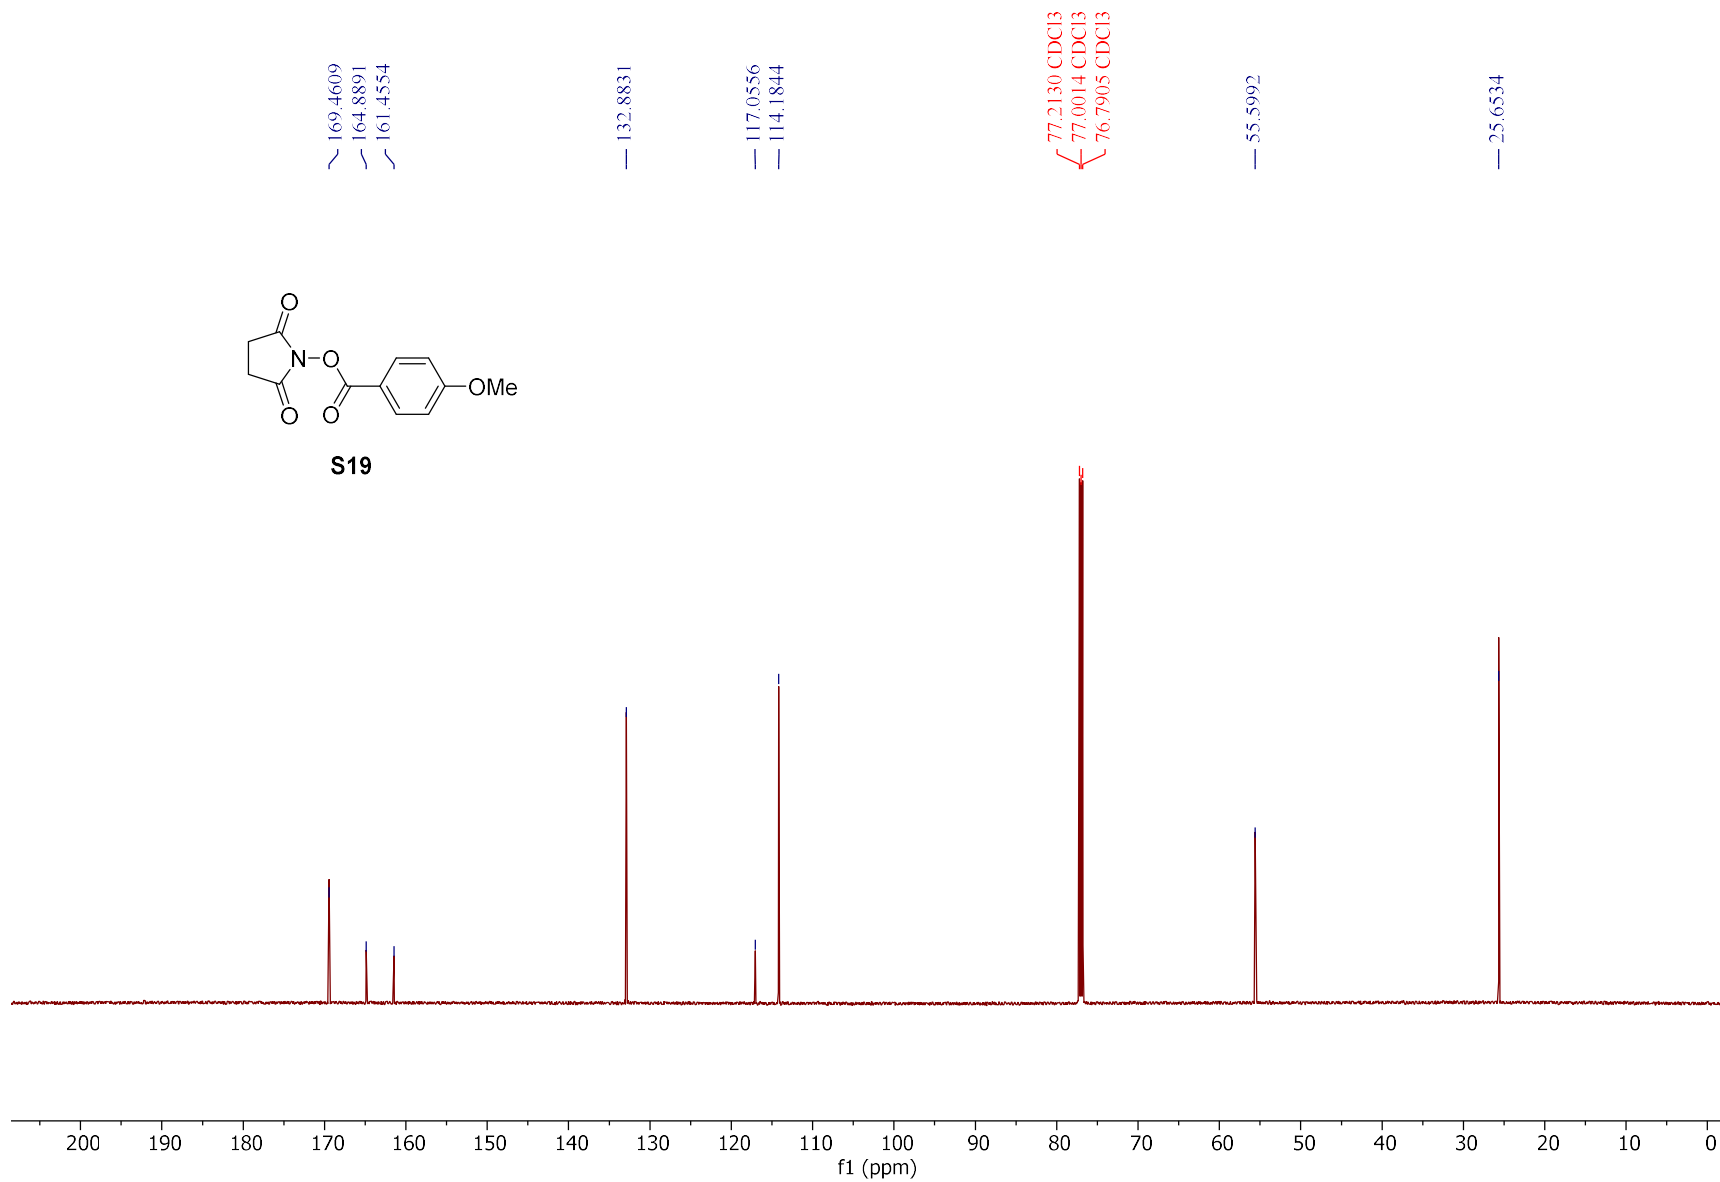

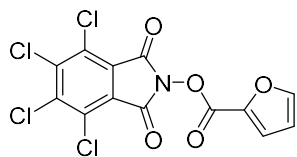

S21

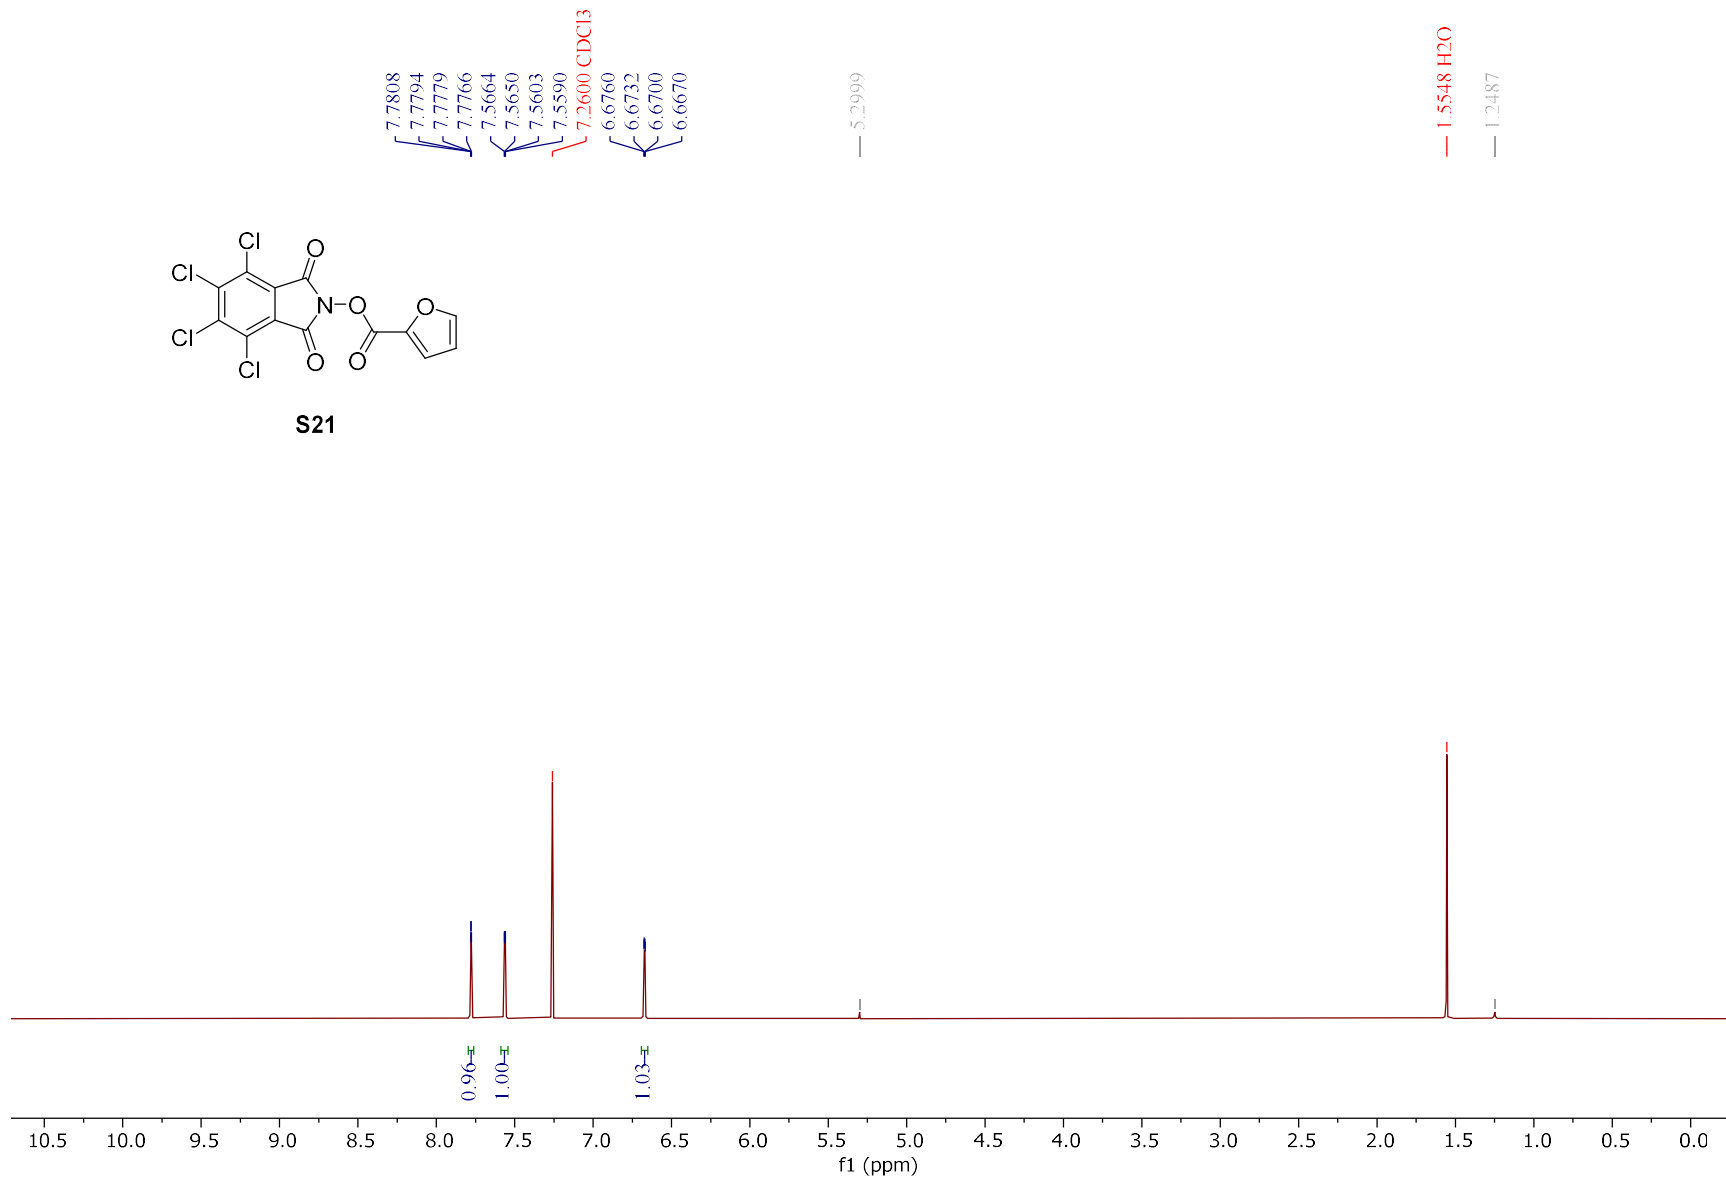

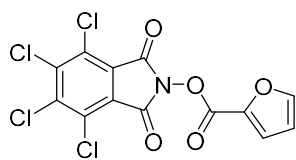

S21

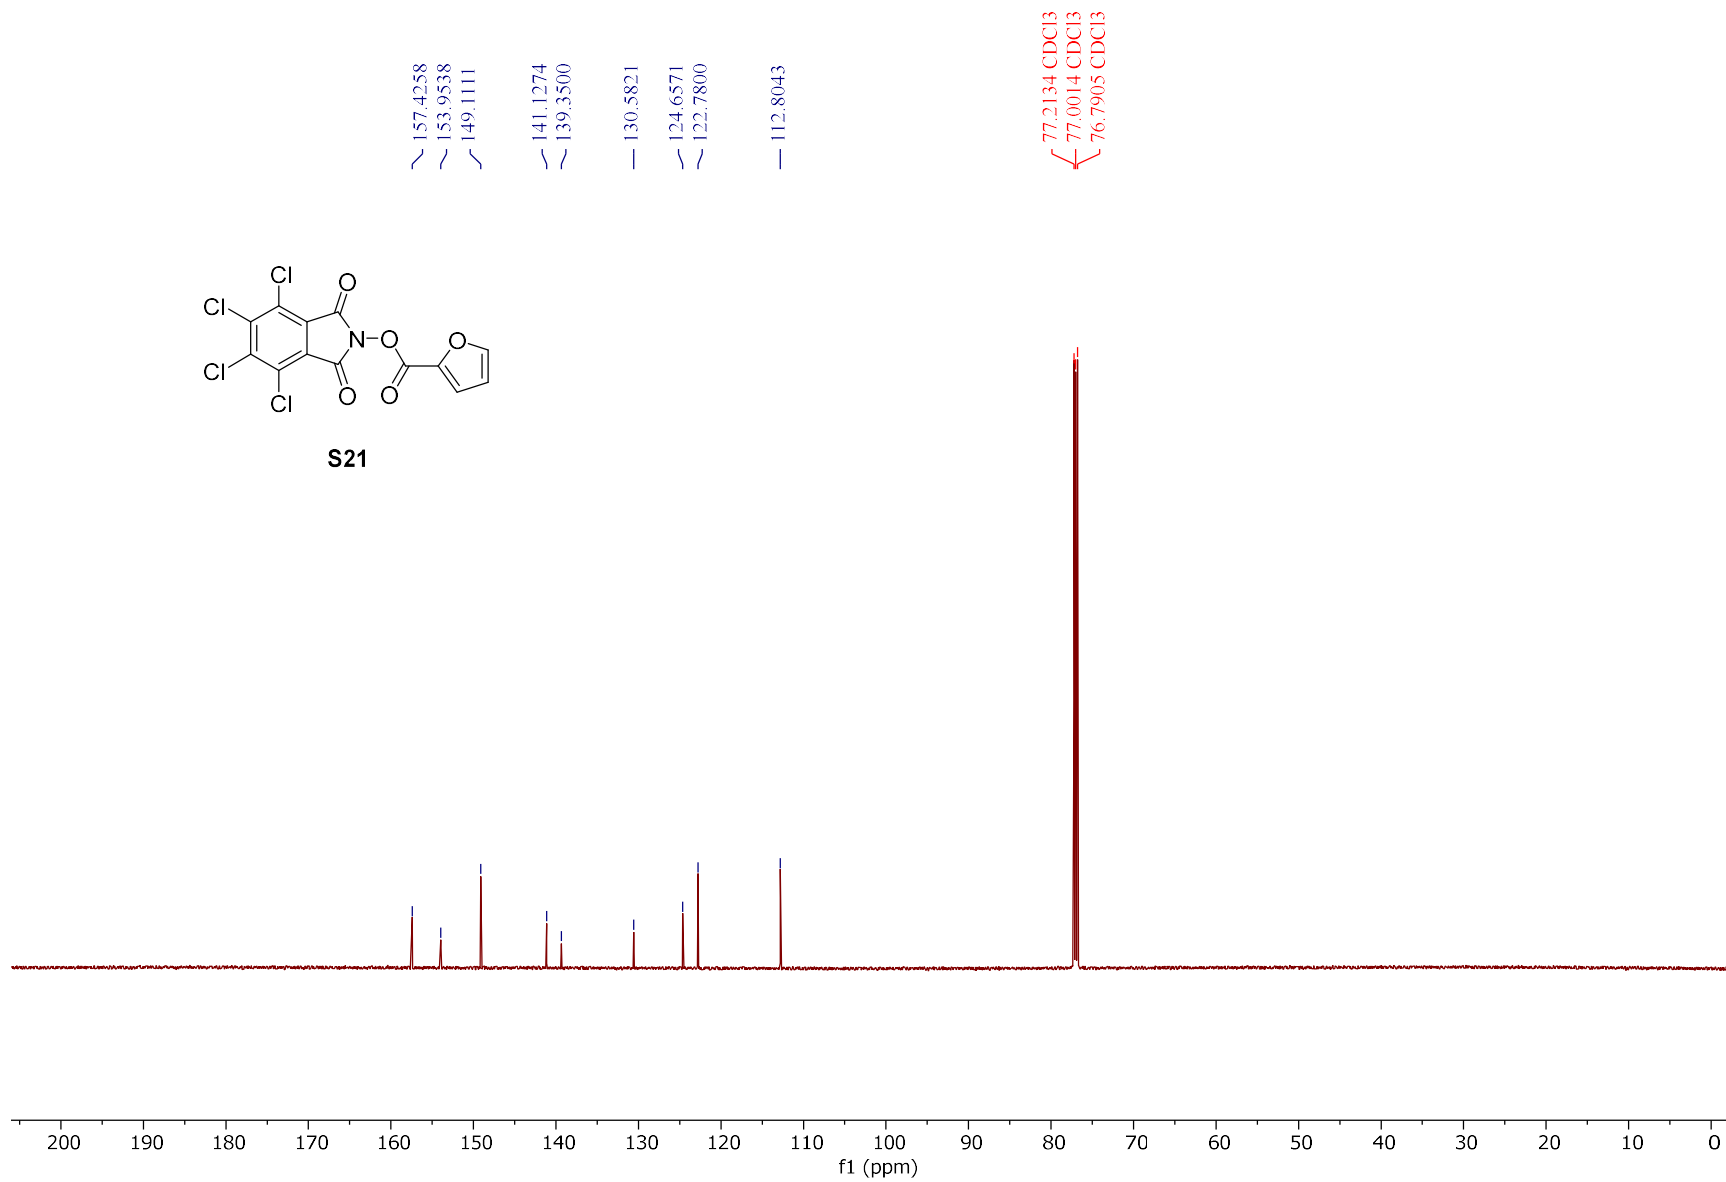

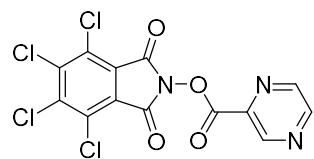

S23

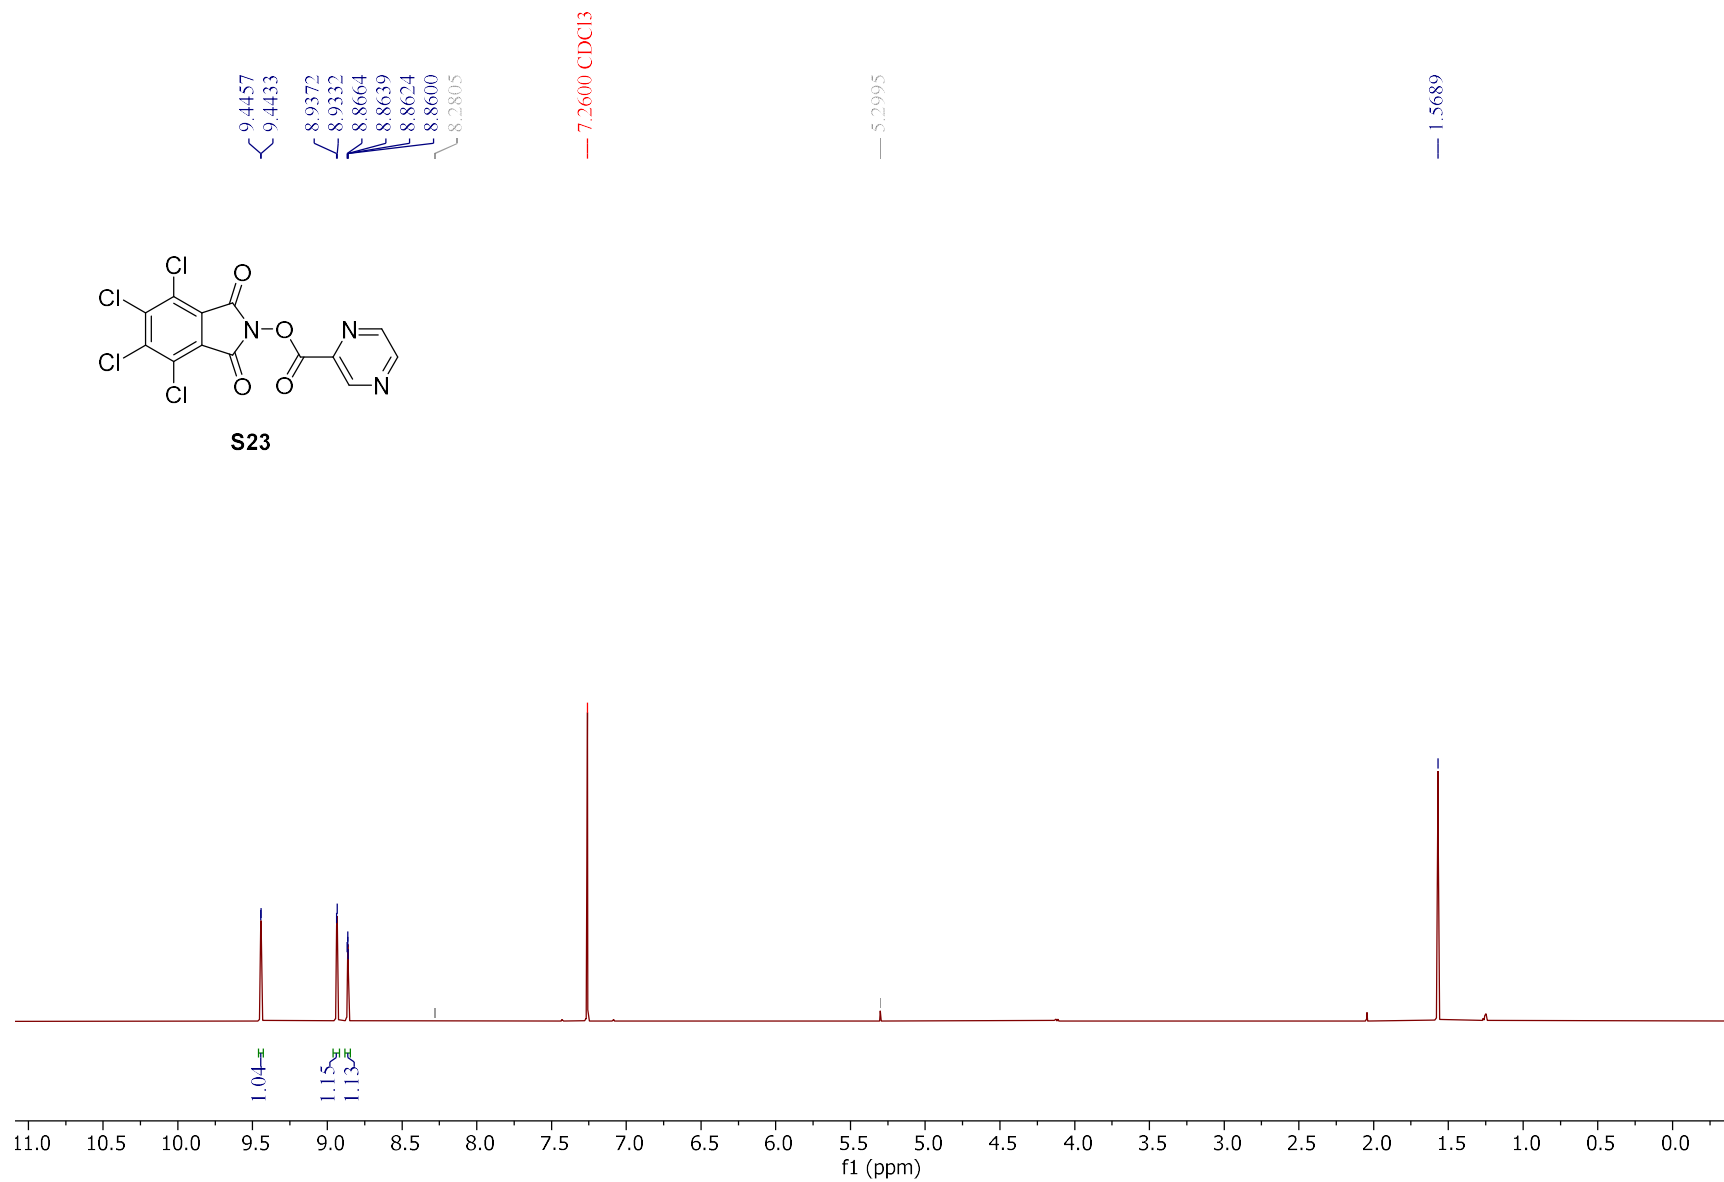



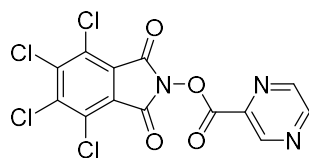

S23

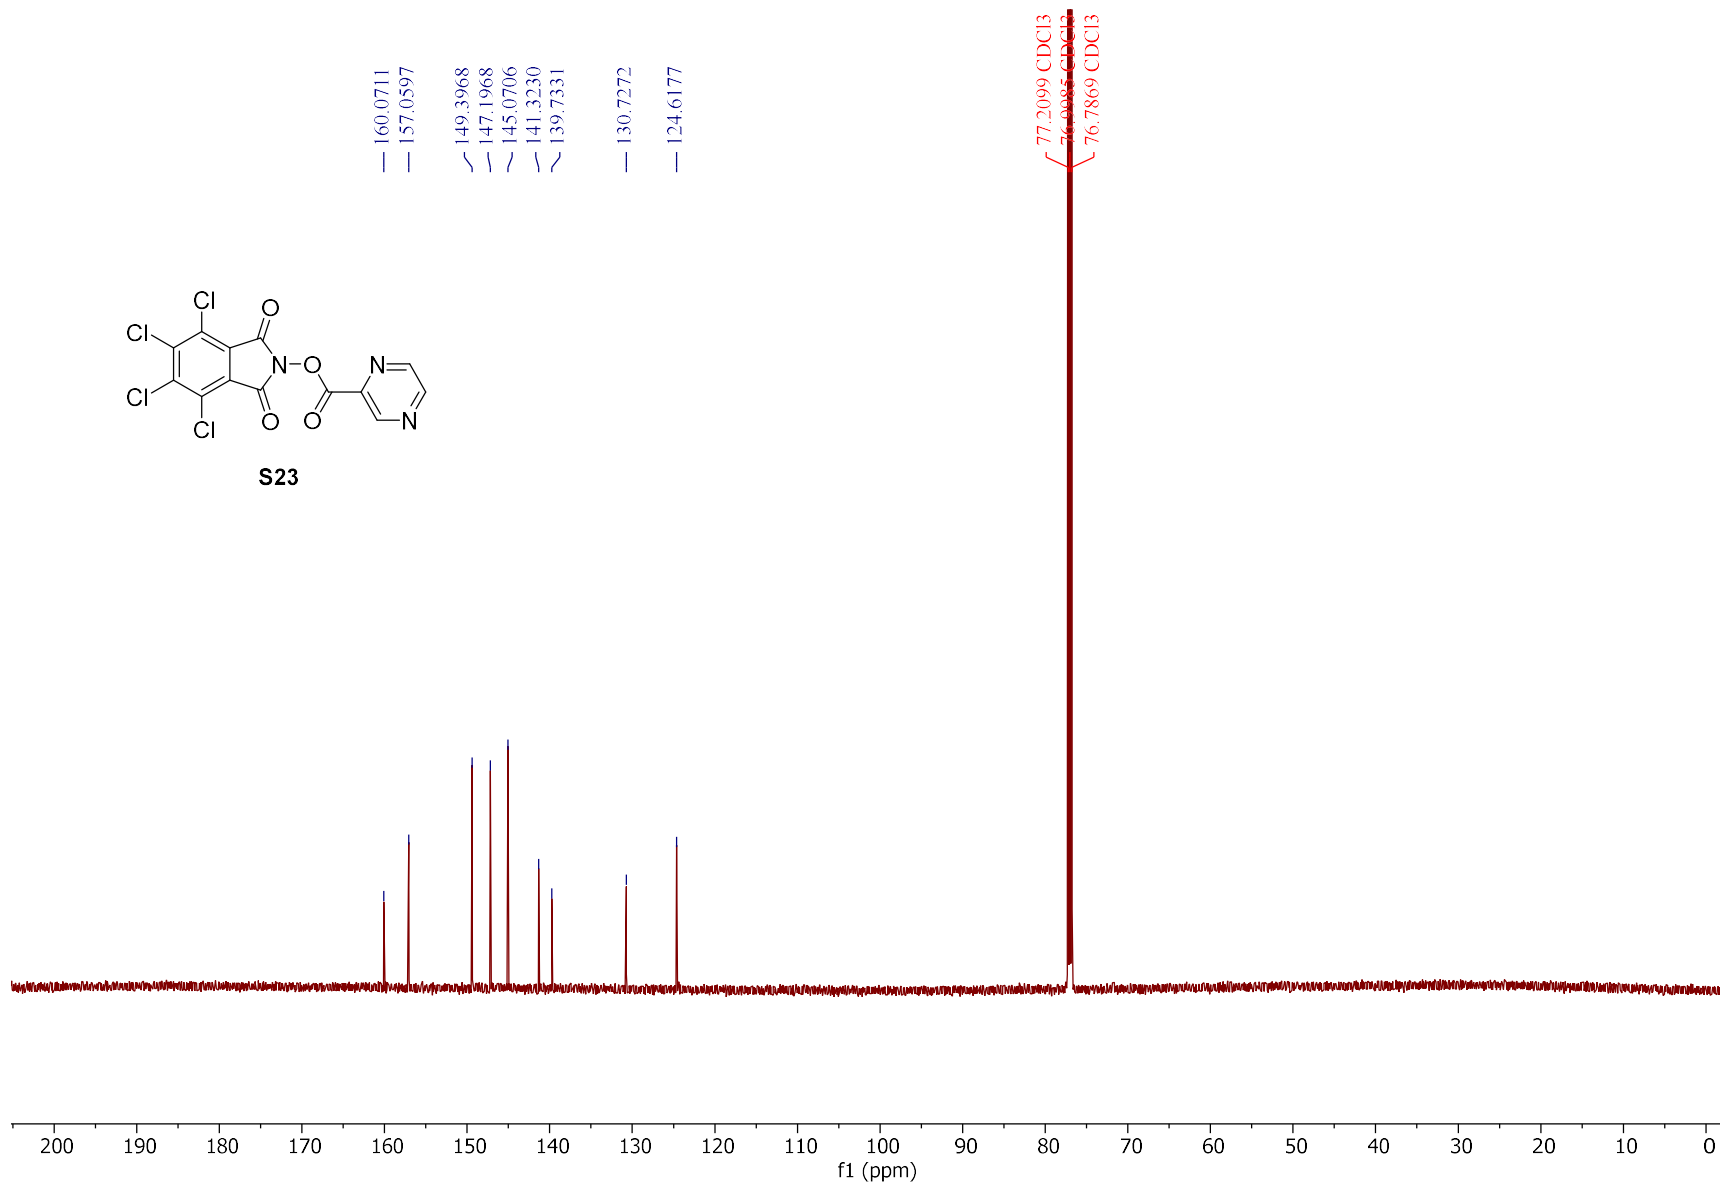

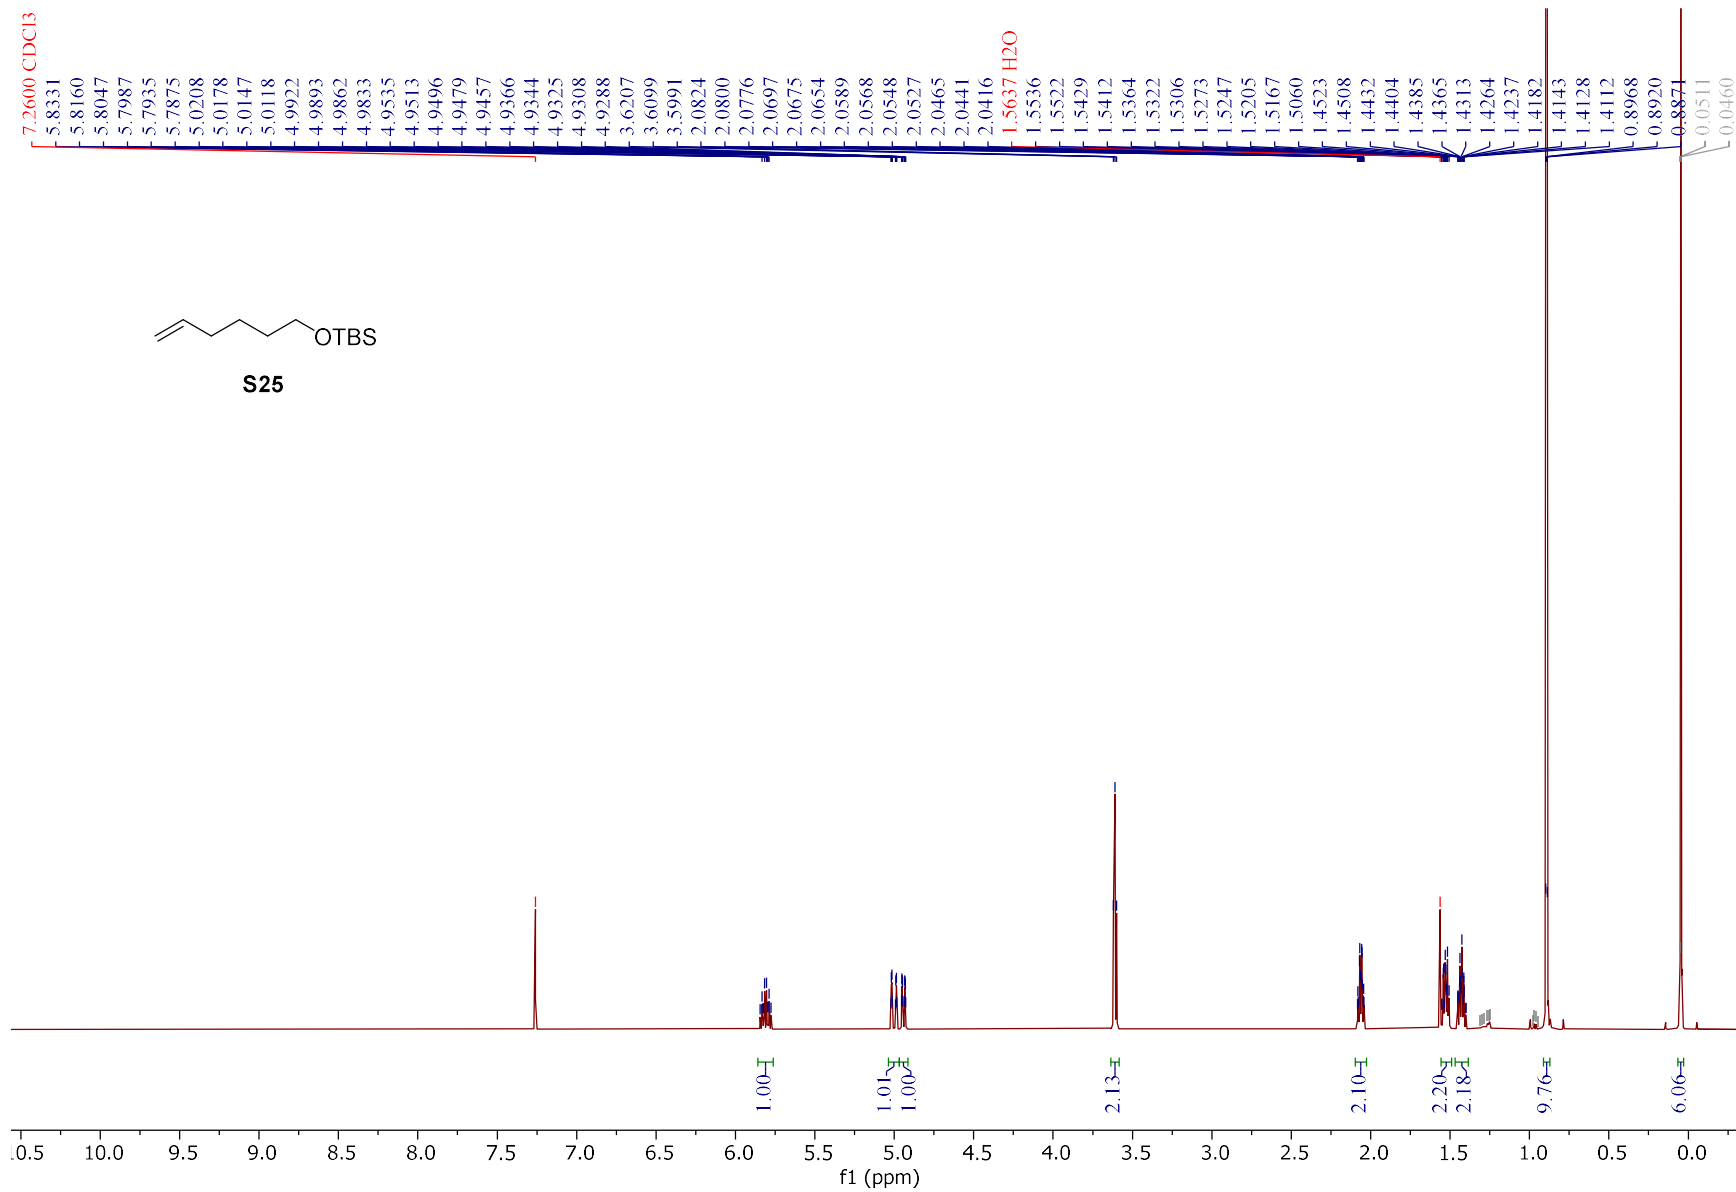

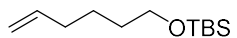

S25

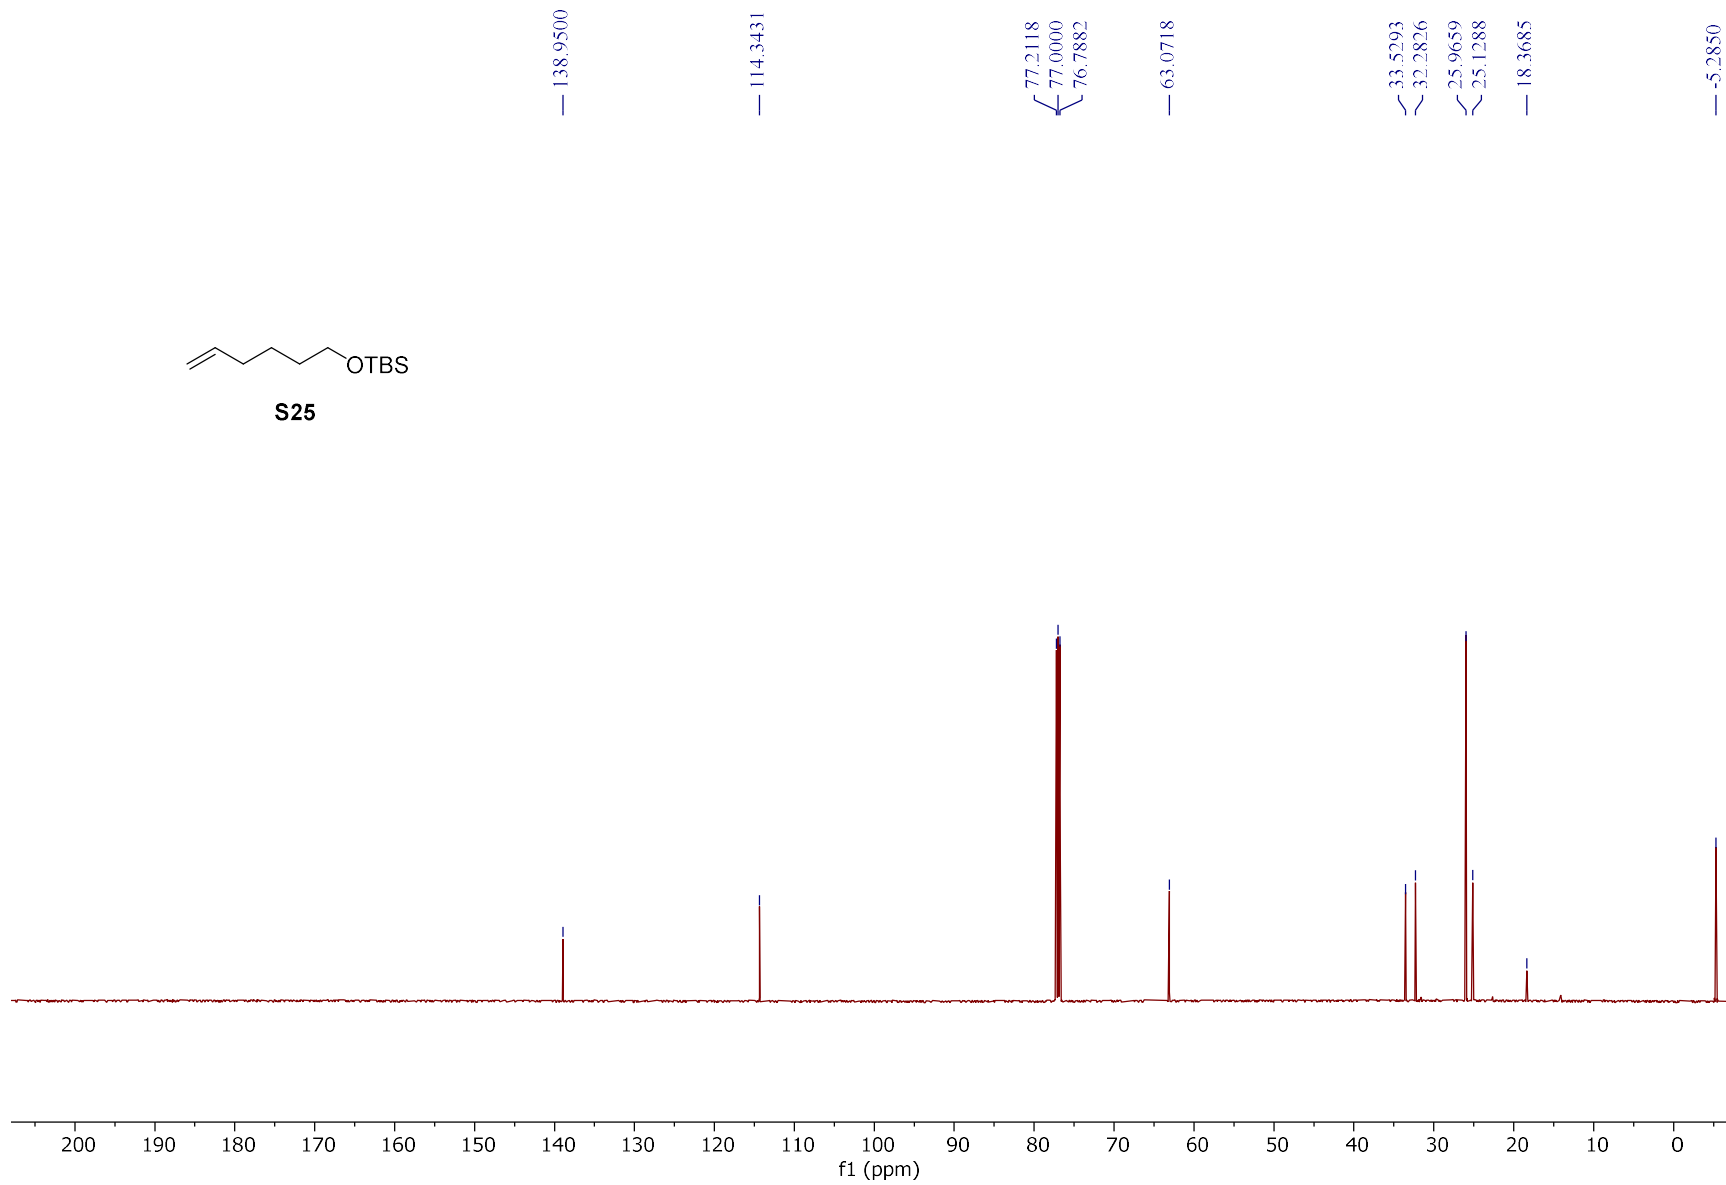

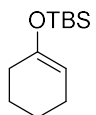

S27

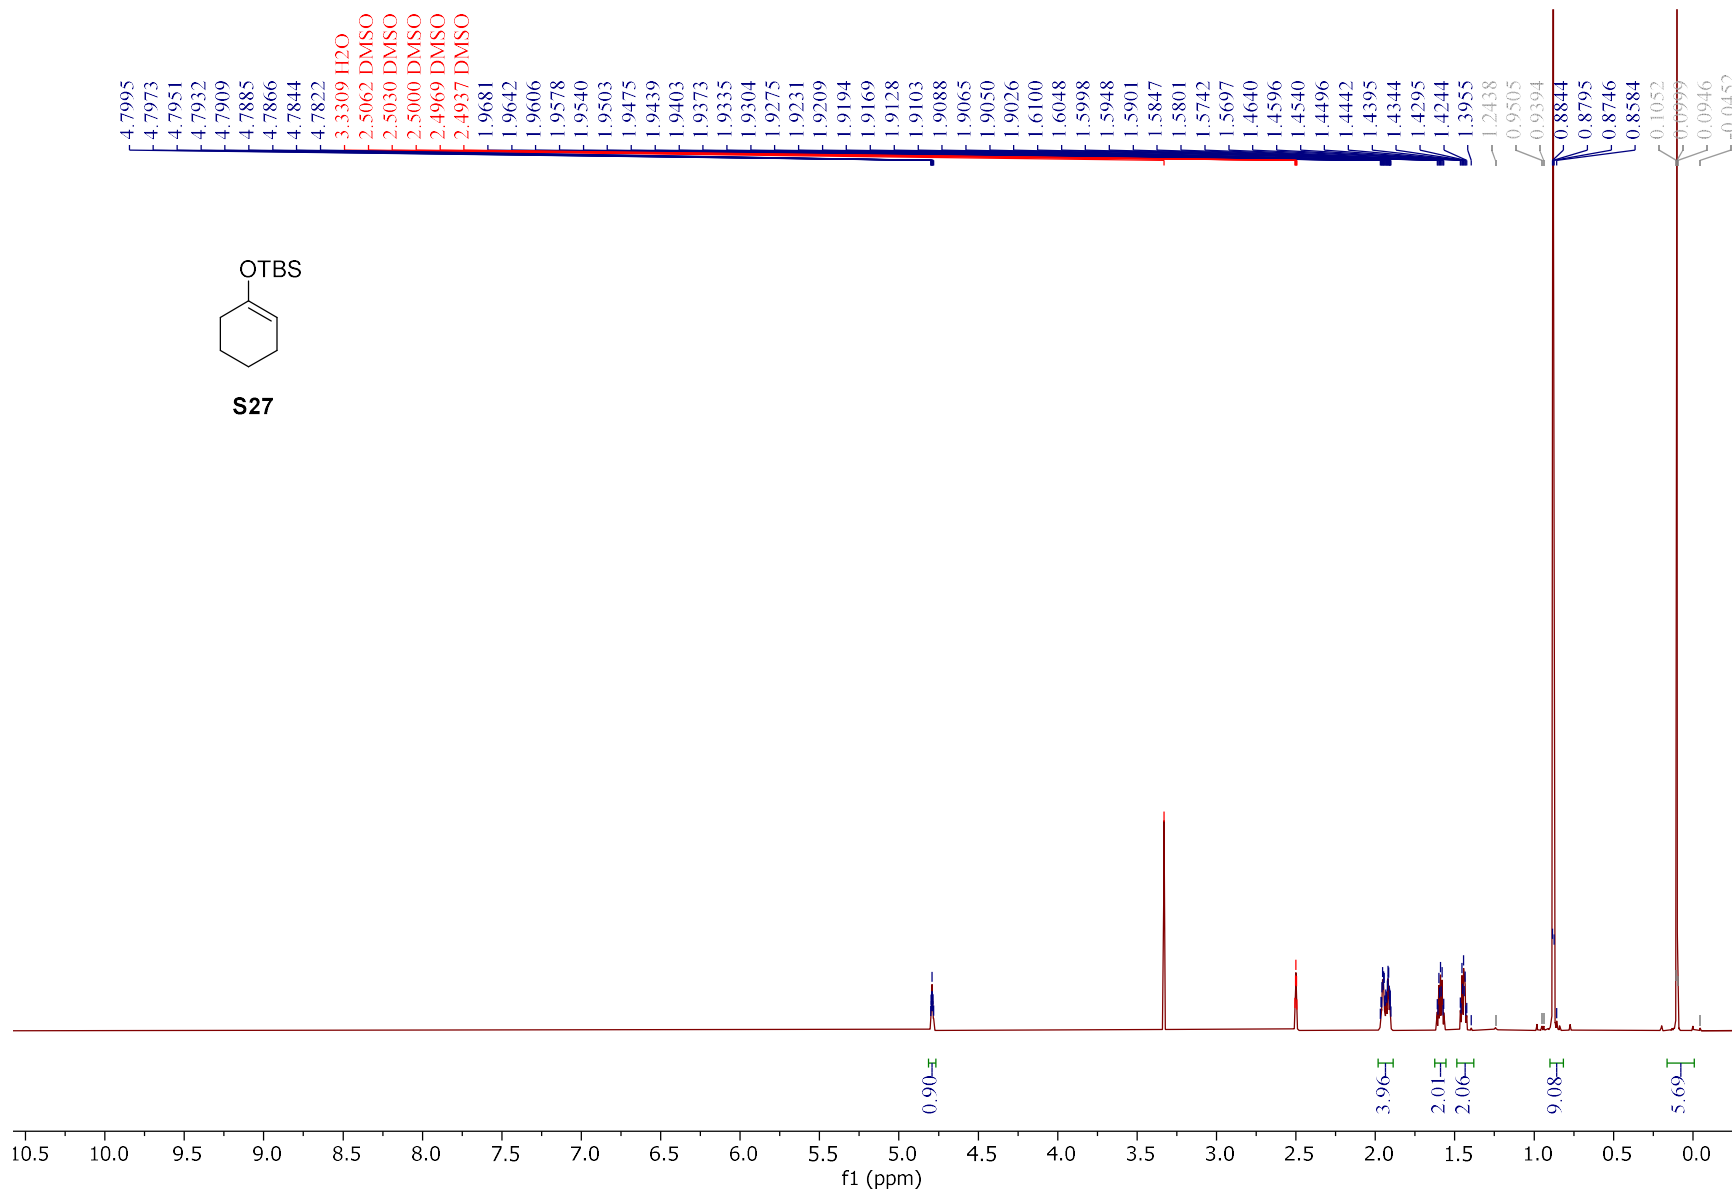

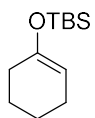

S27

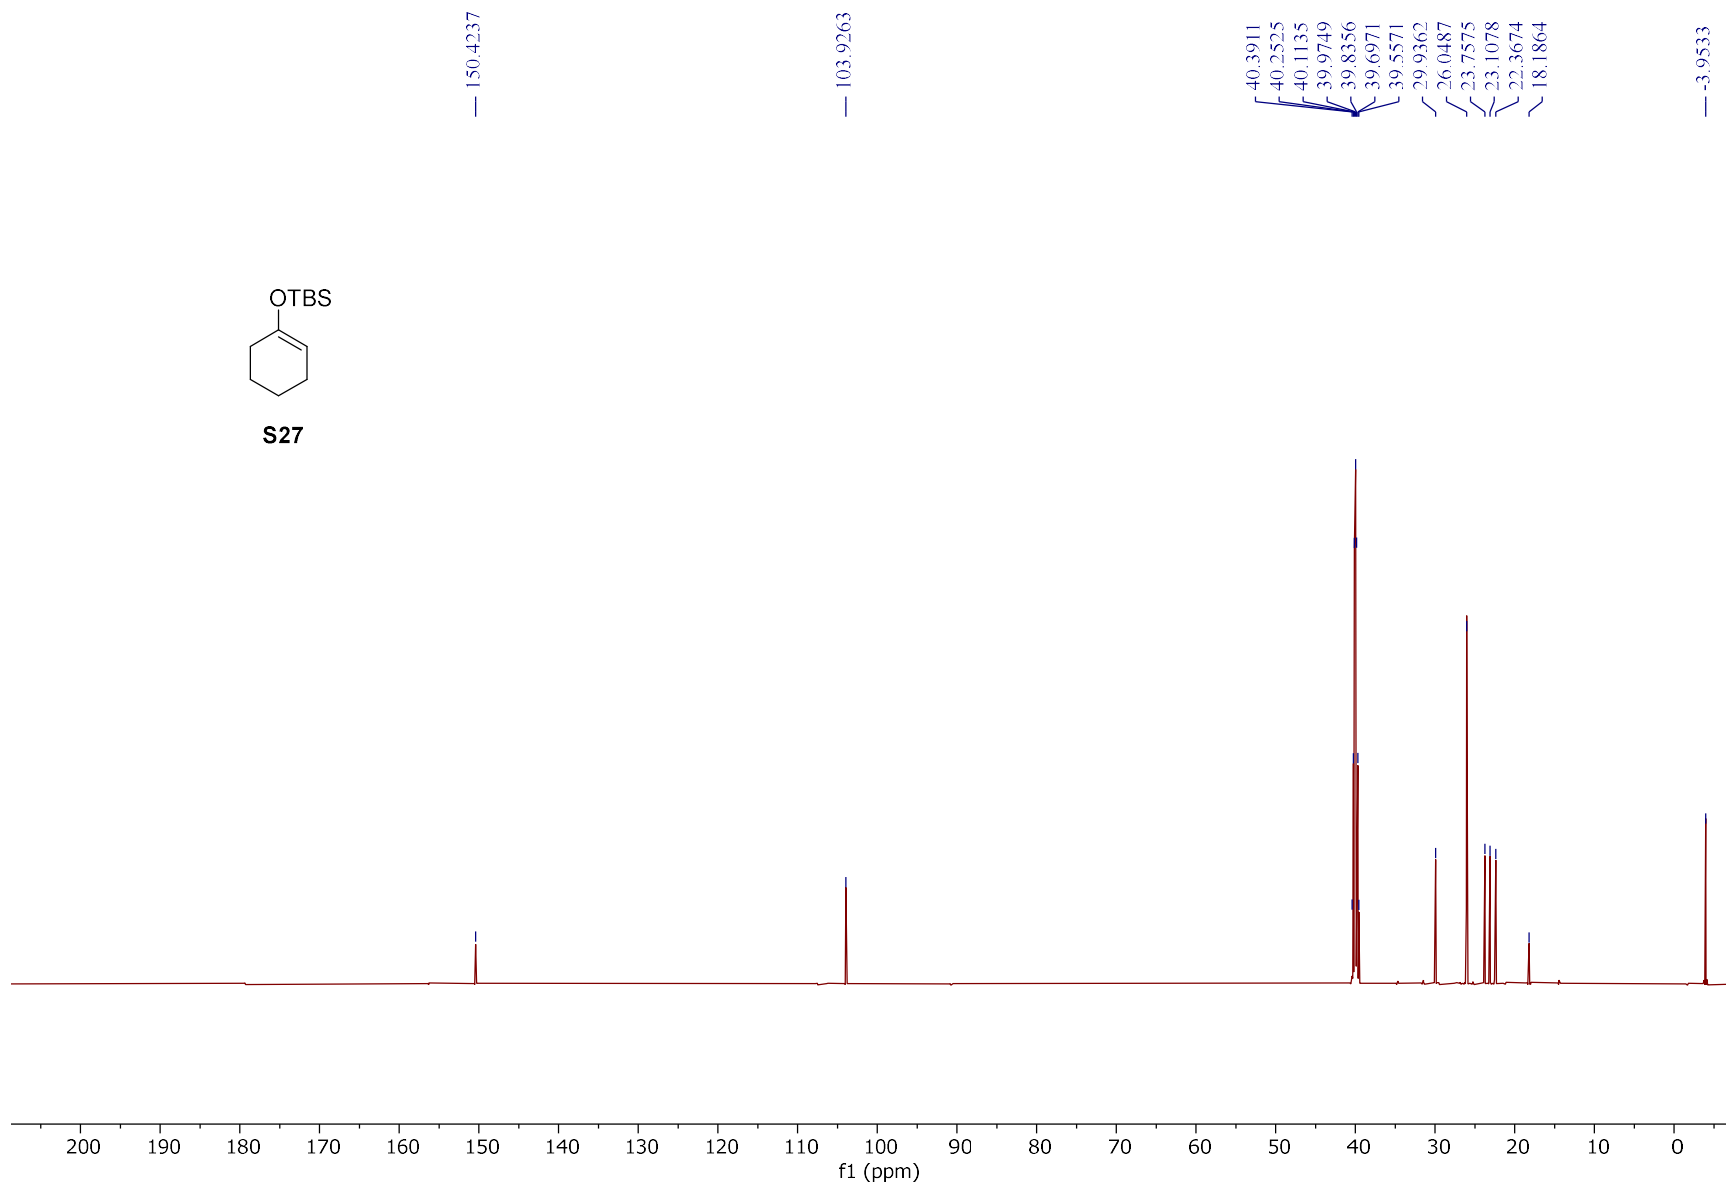

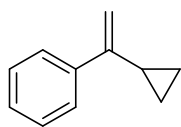

S29

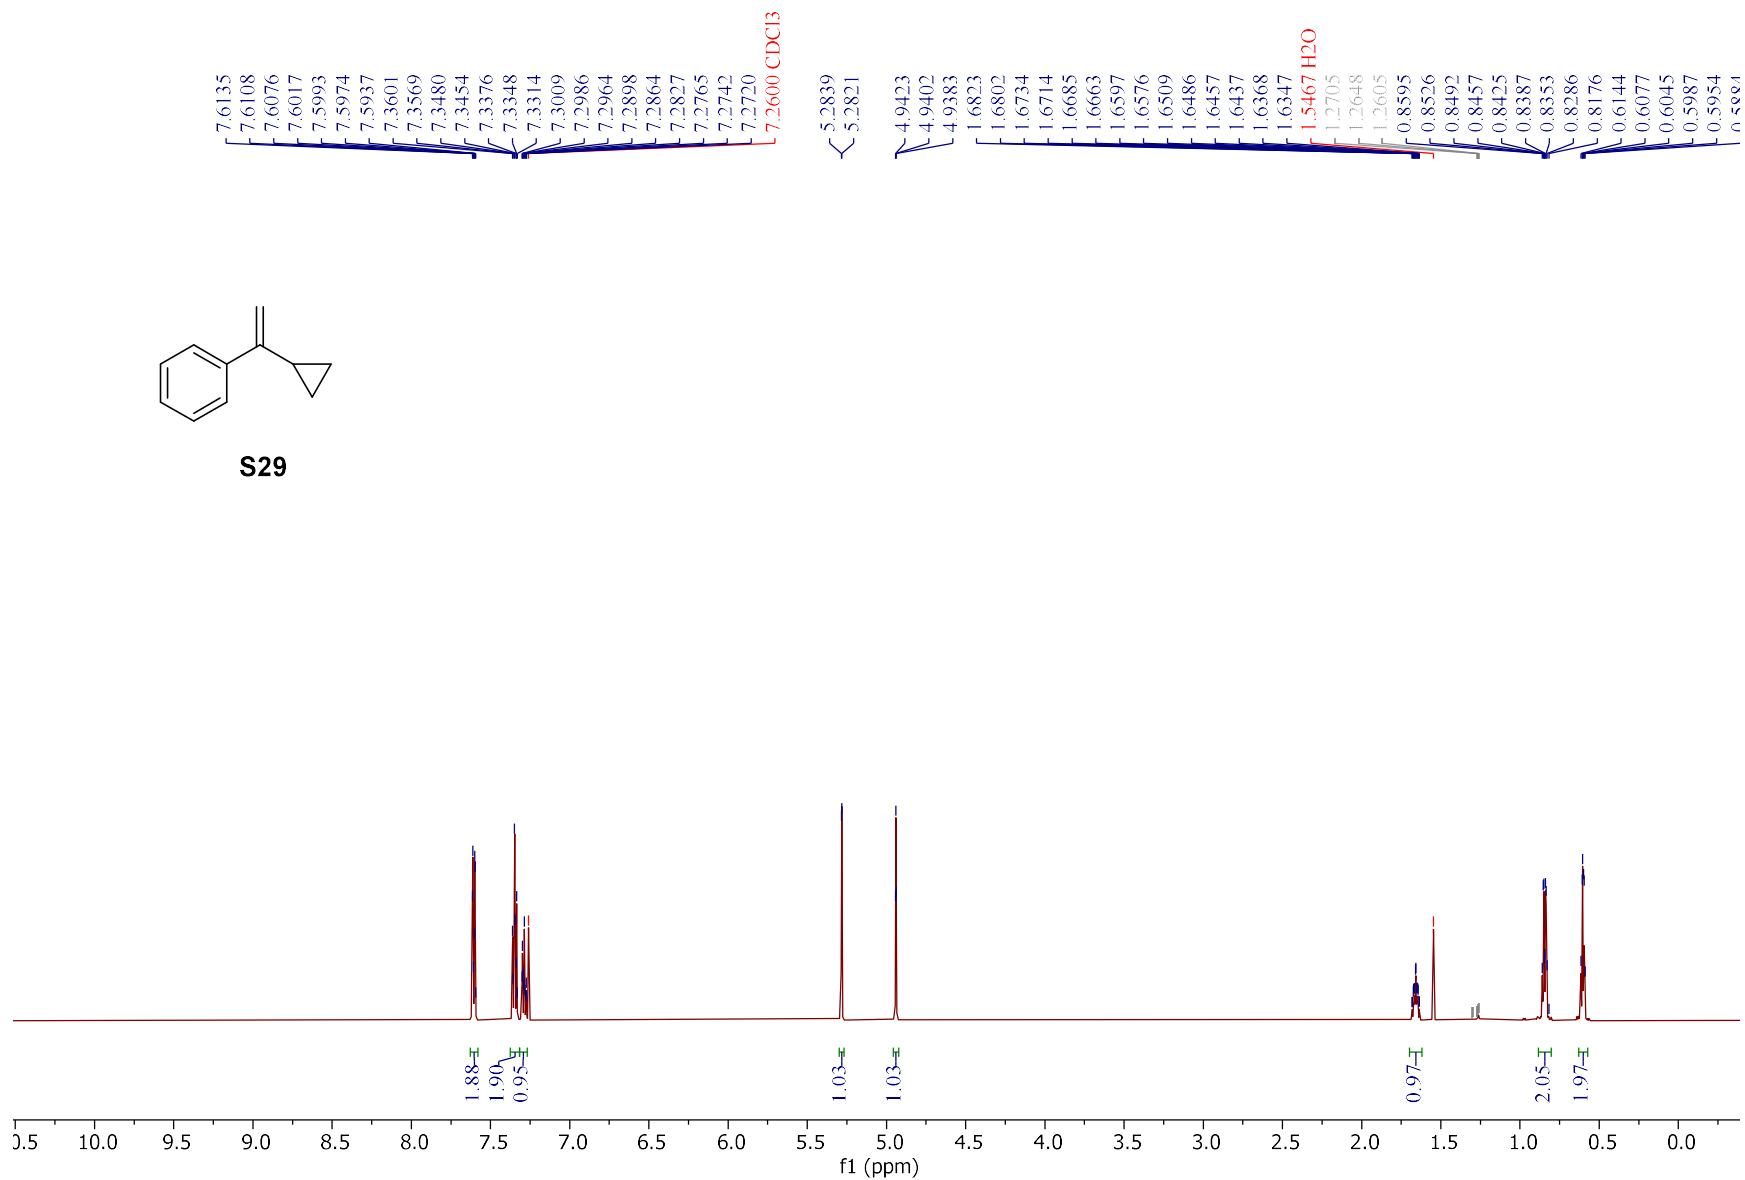

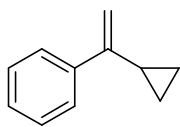

S29

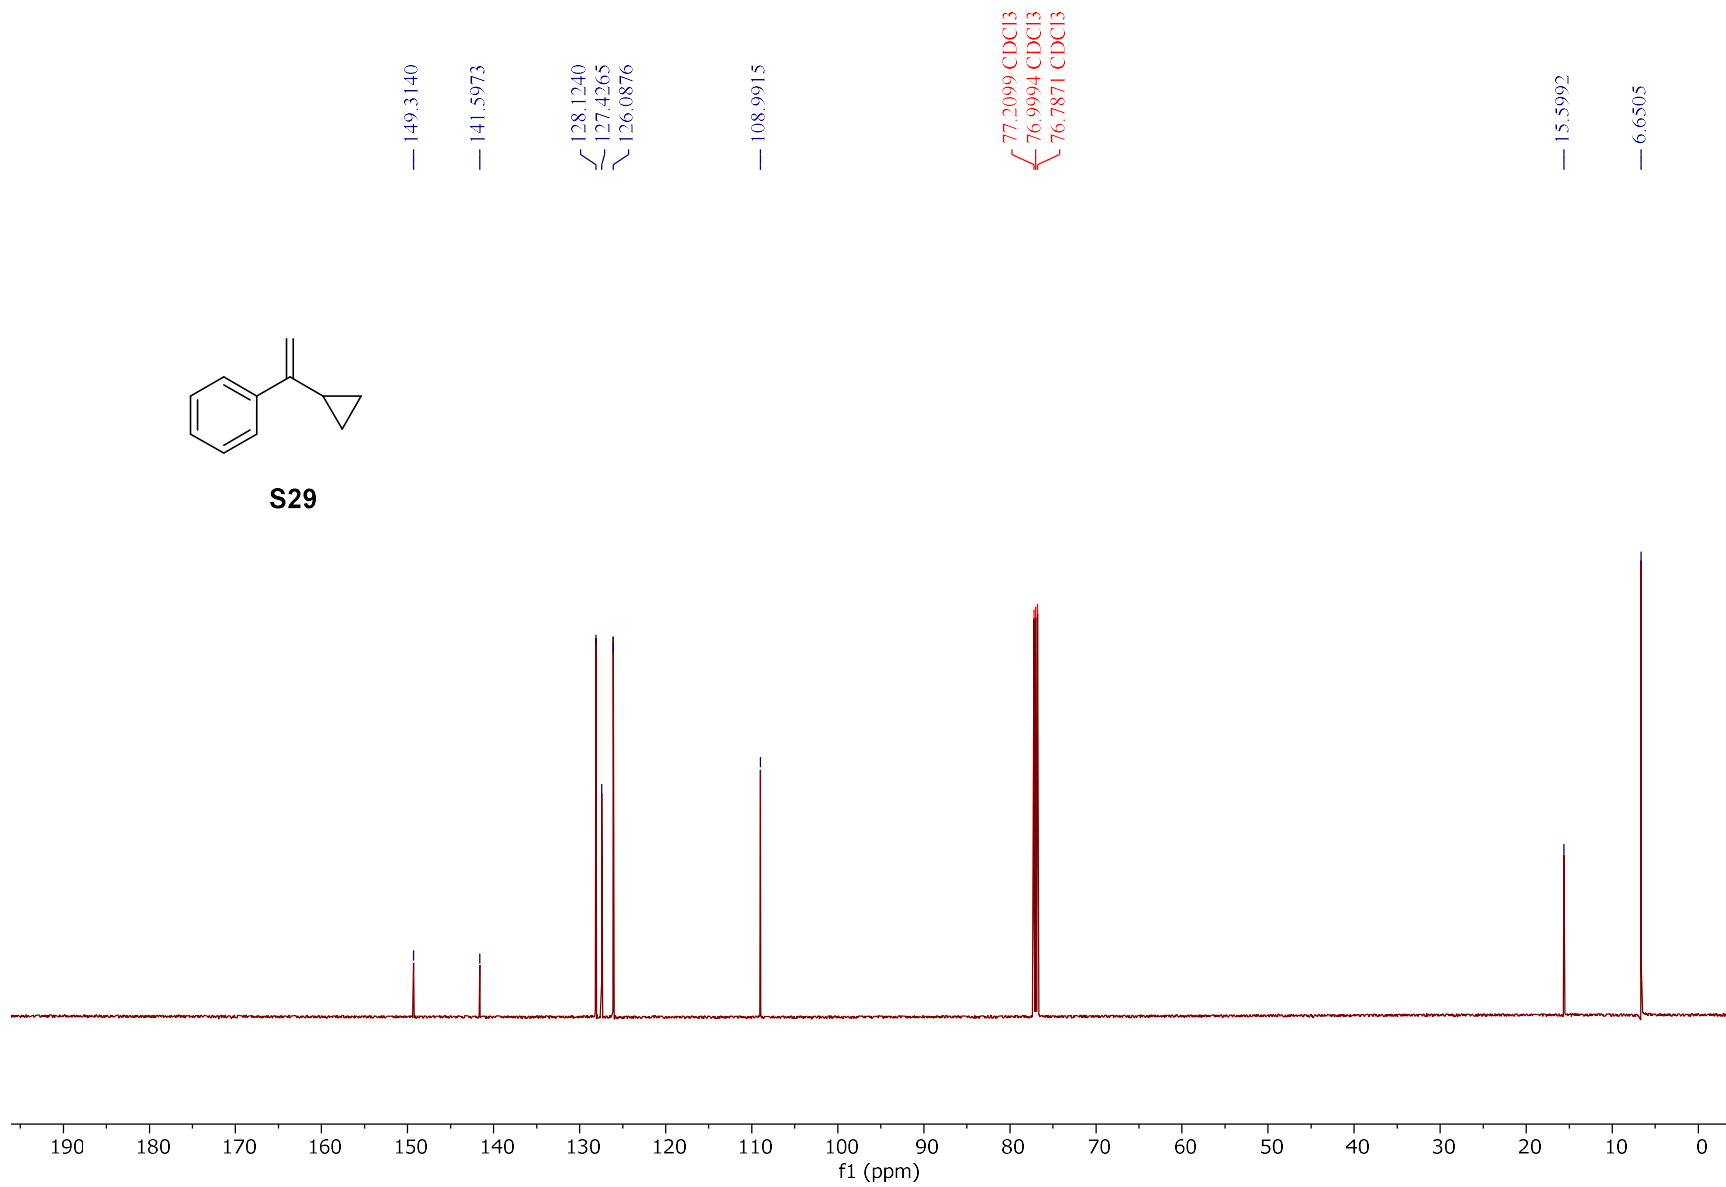

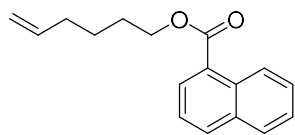

S32

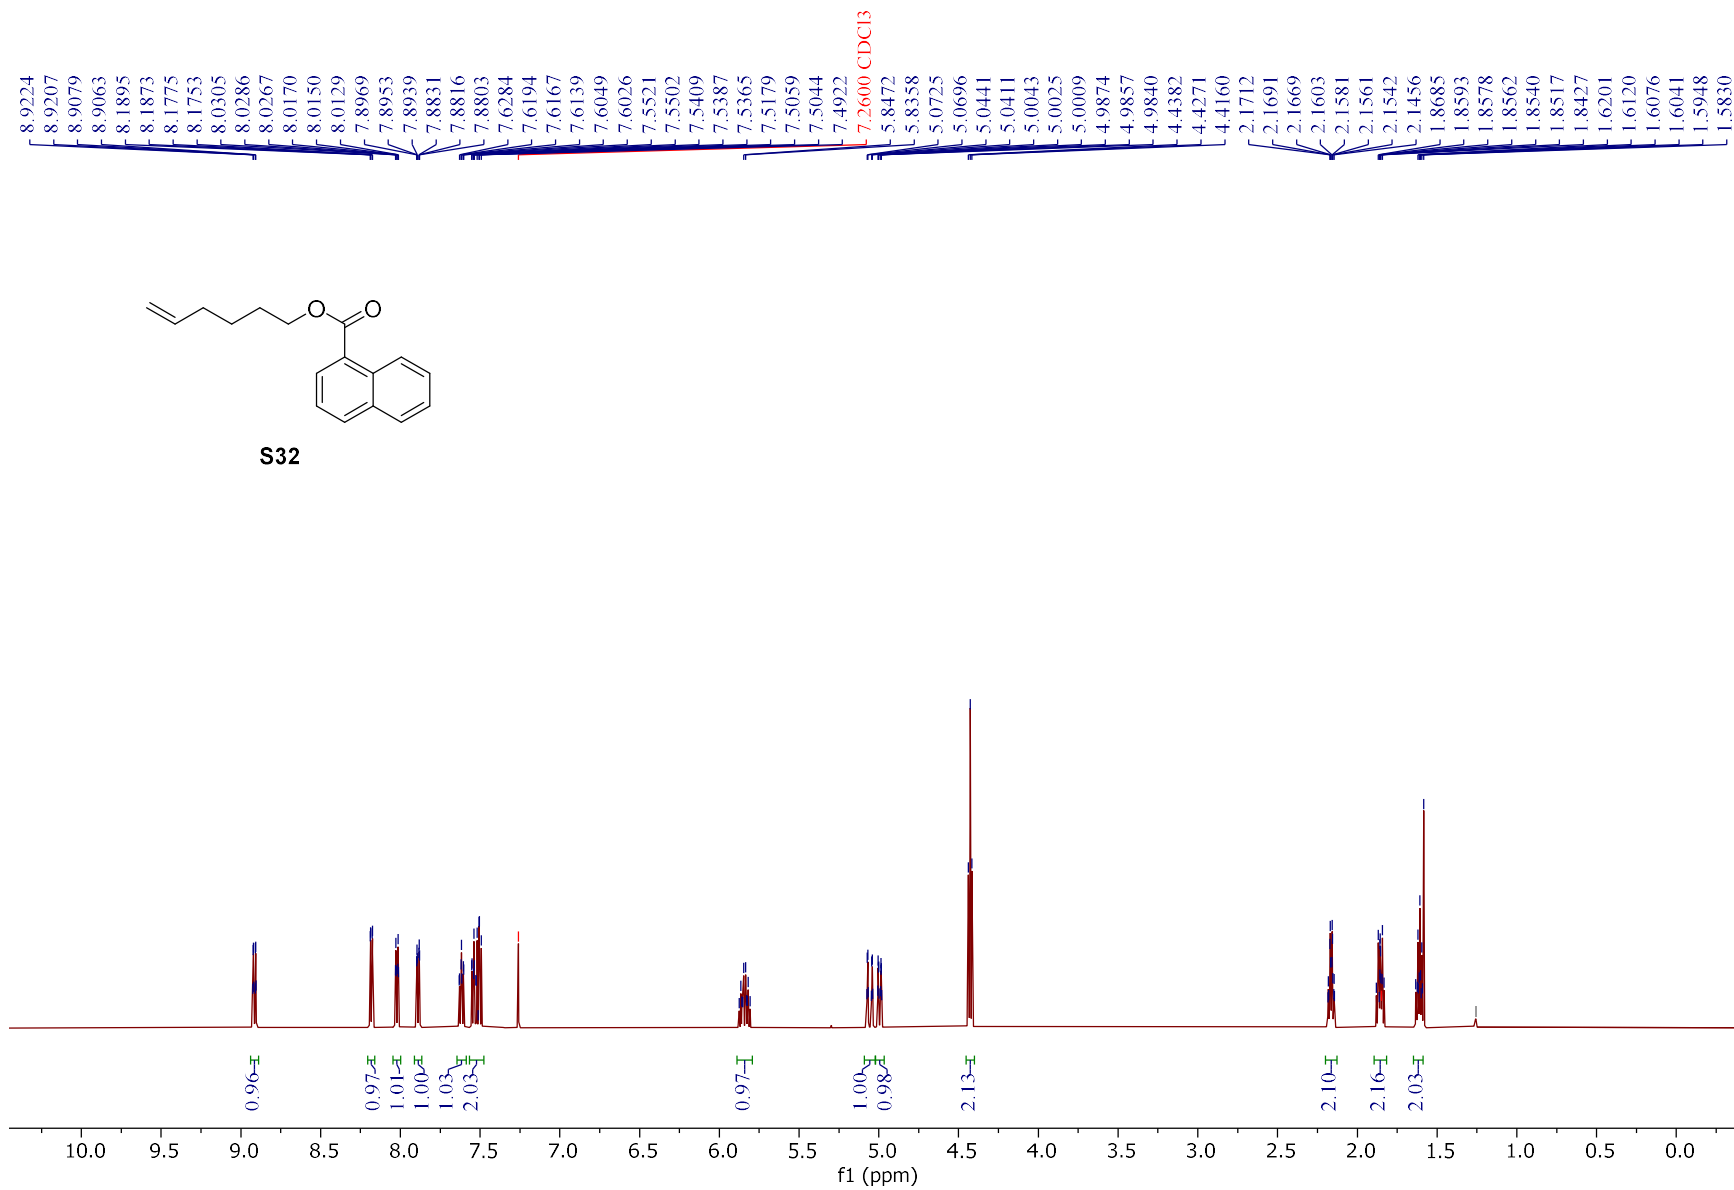



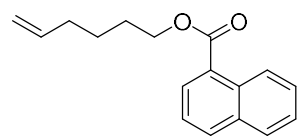

S32

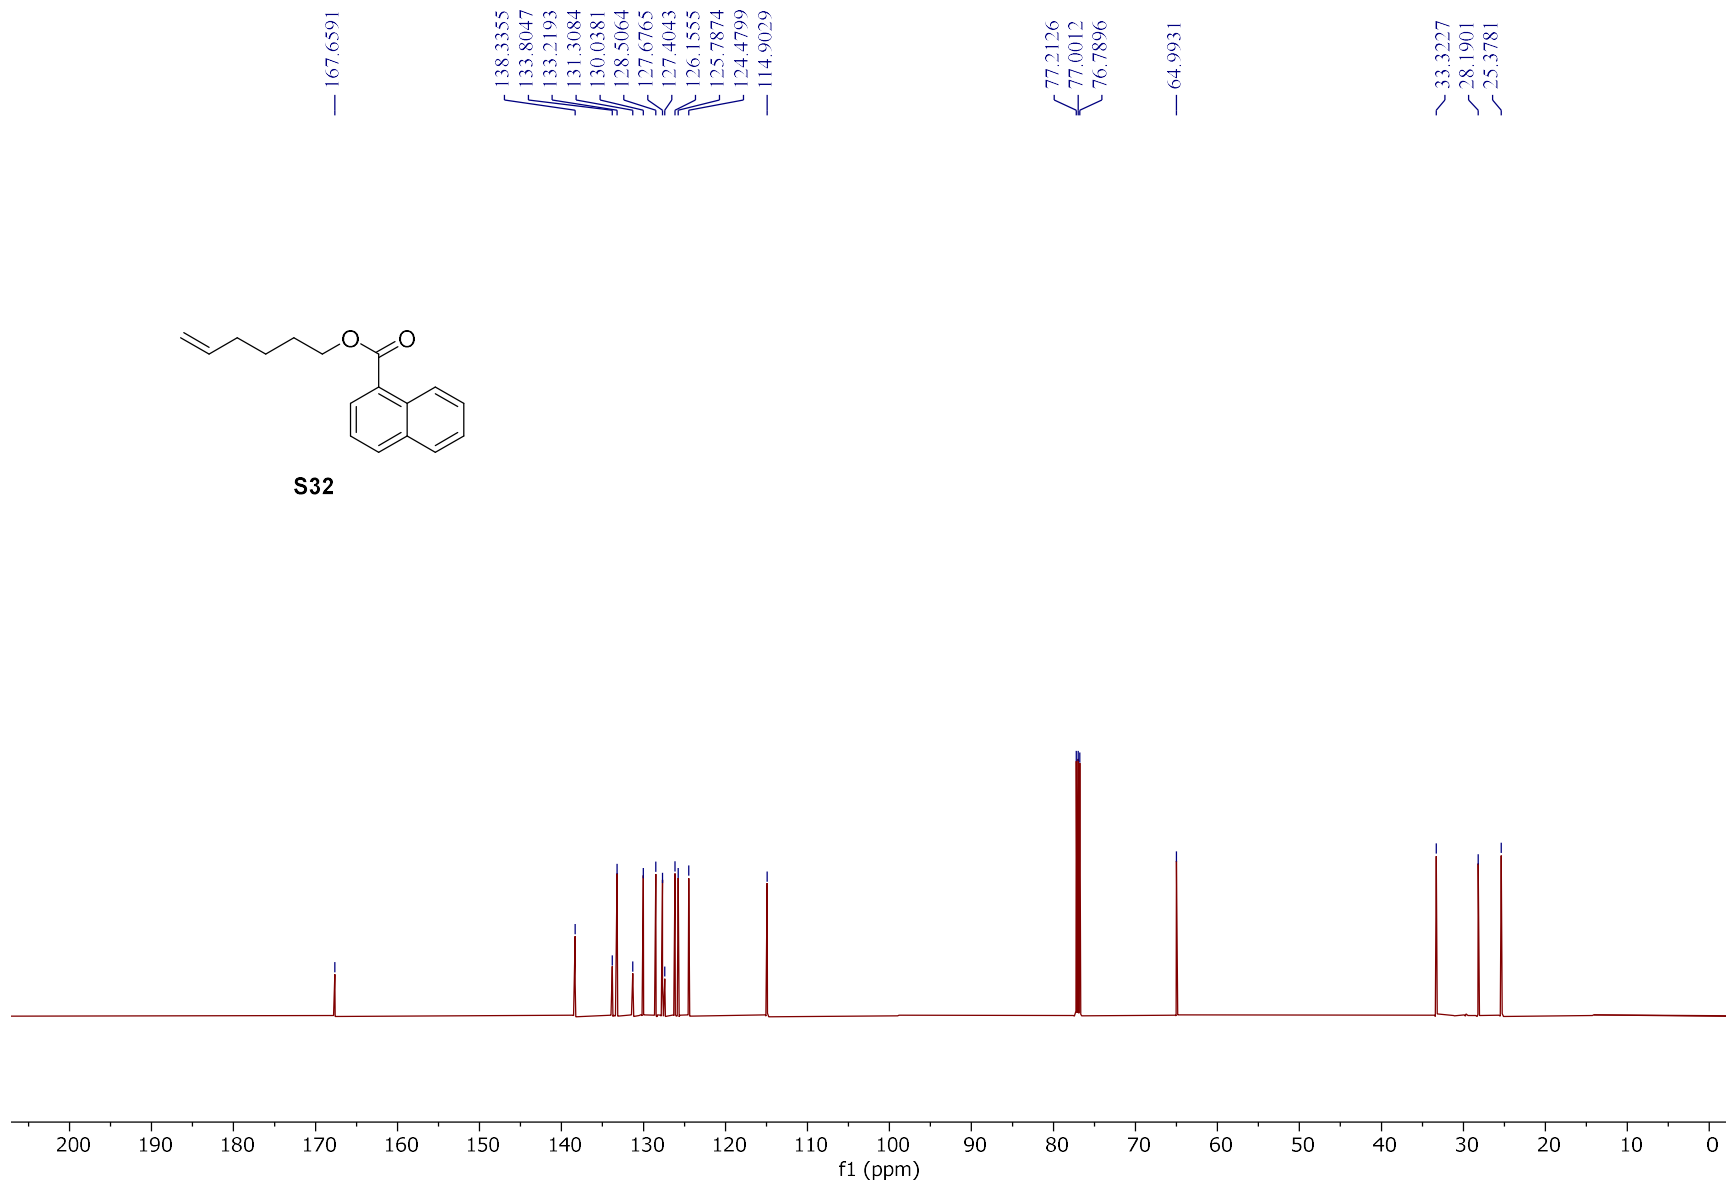

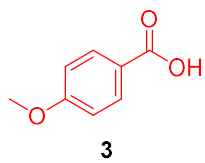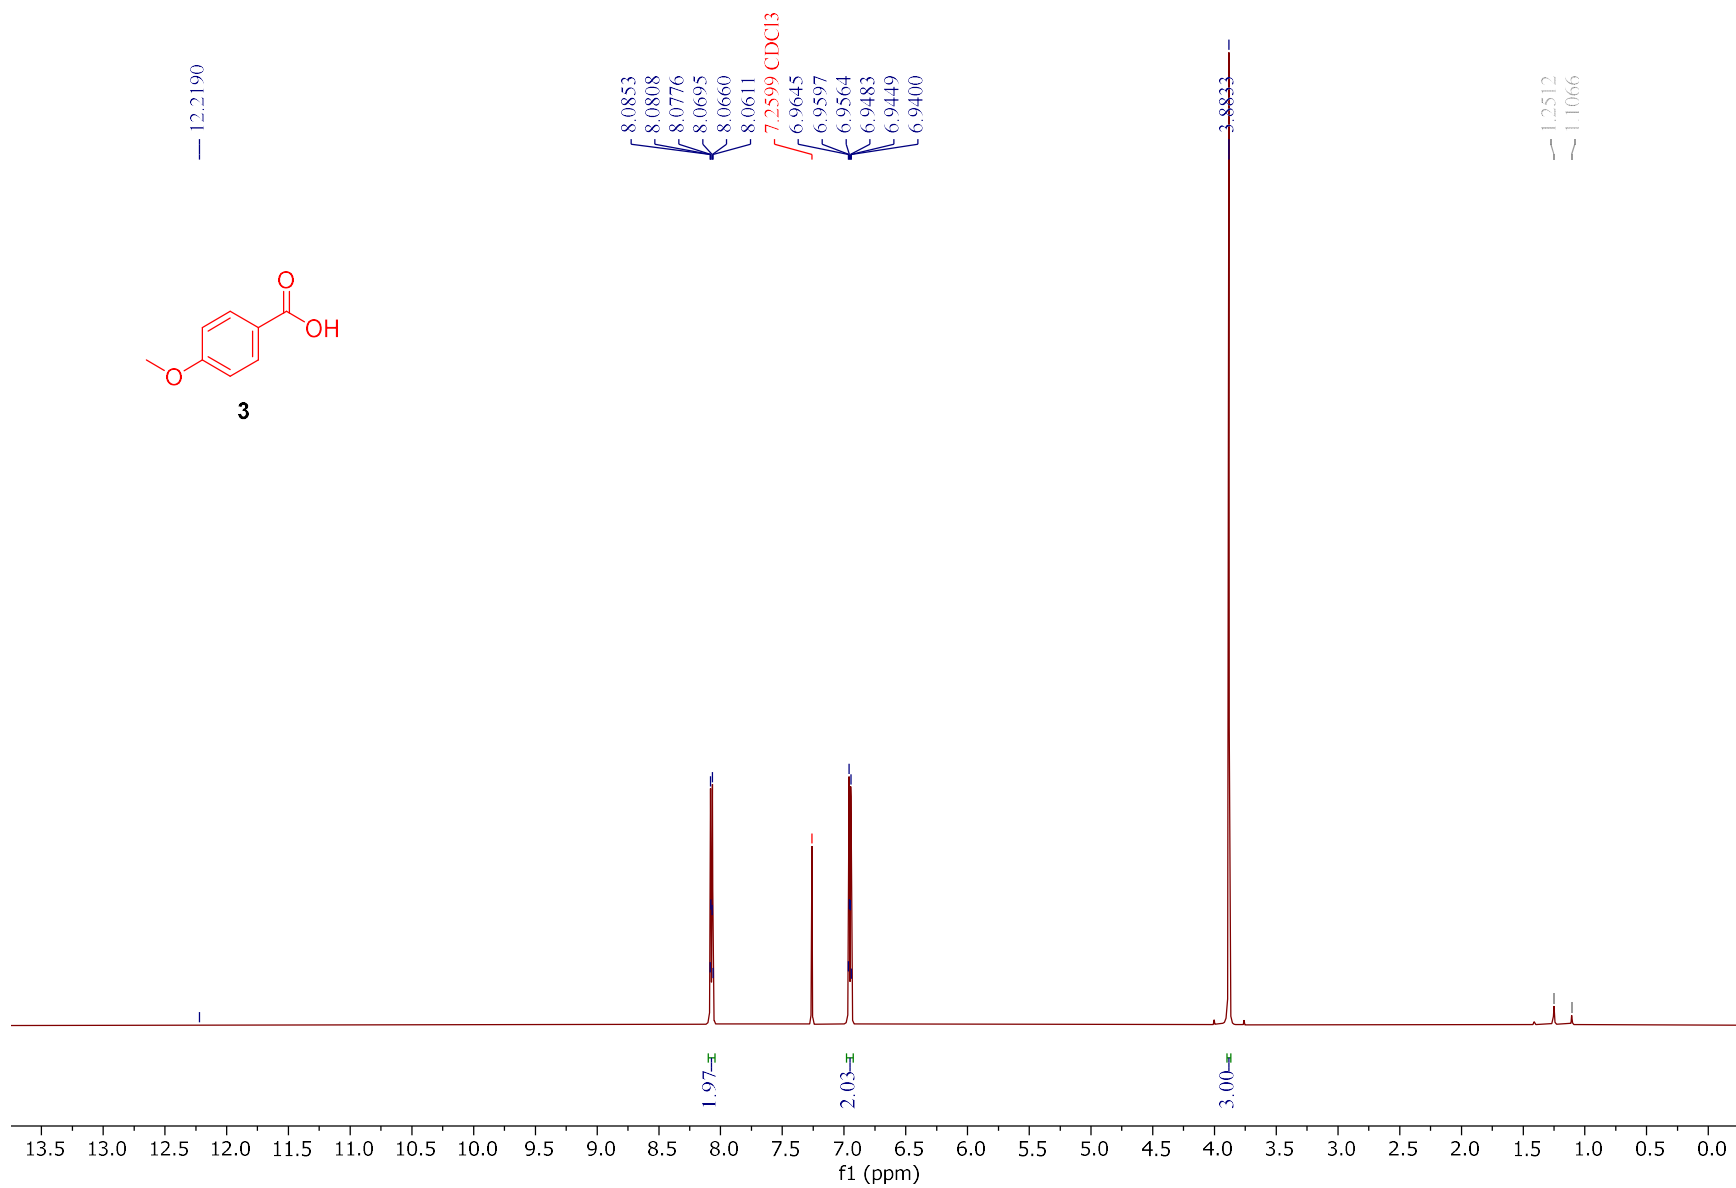

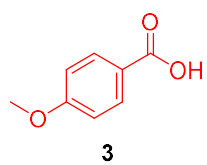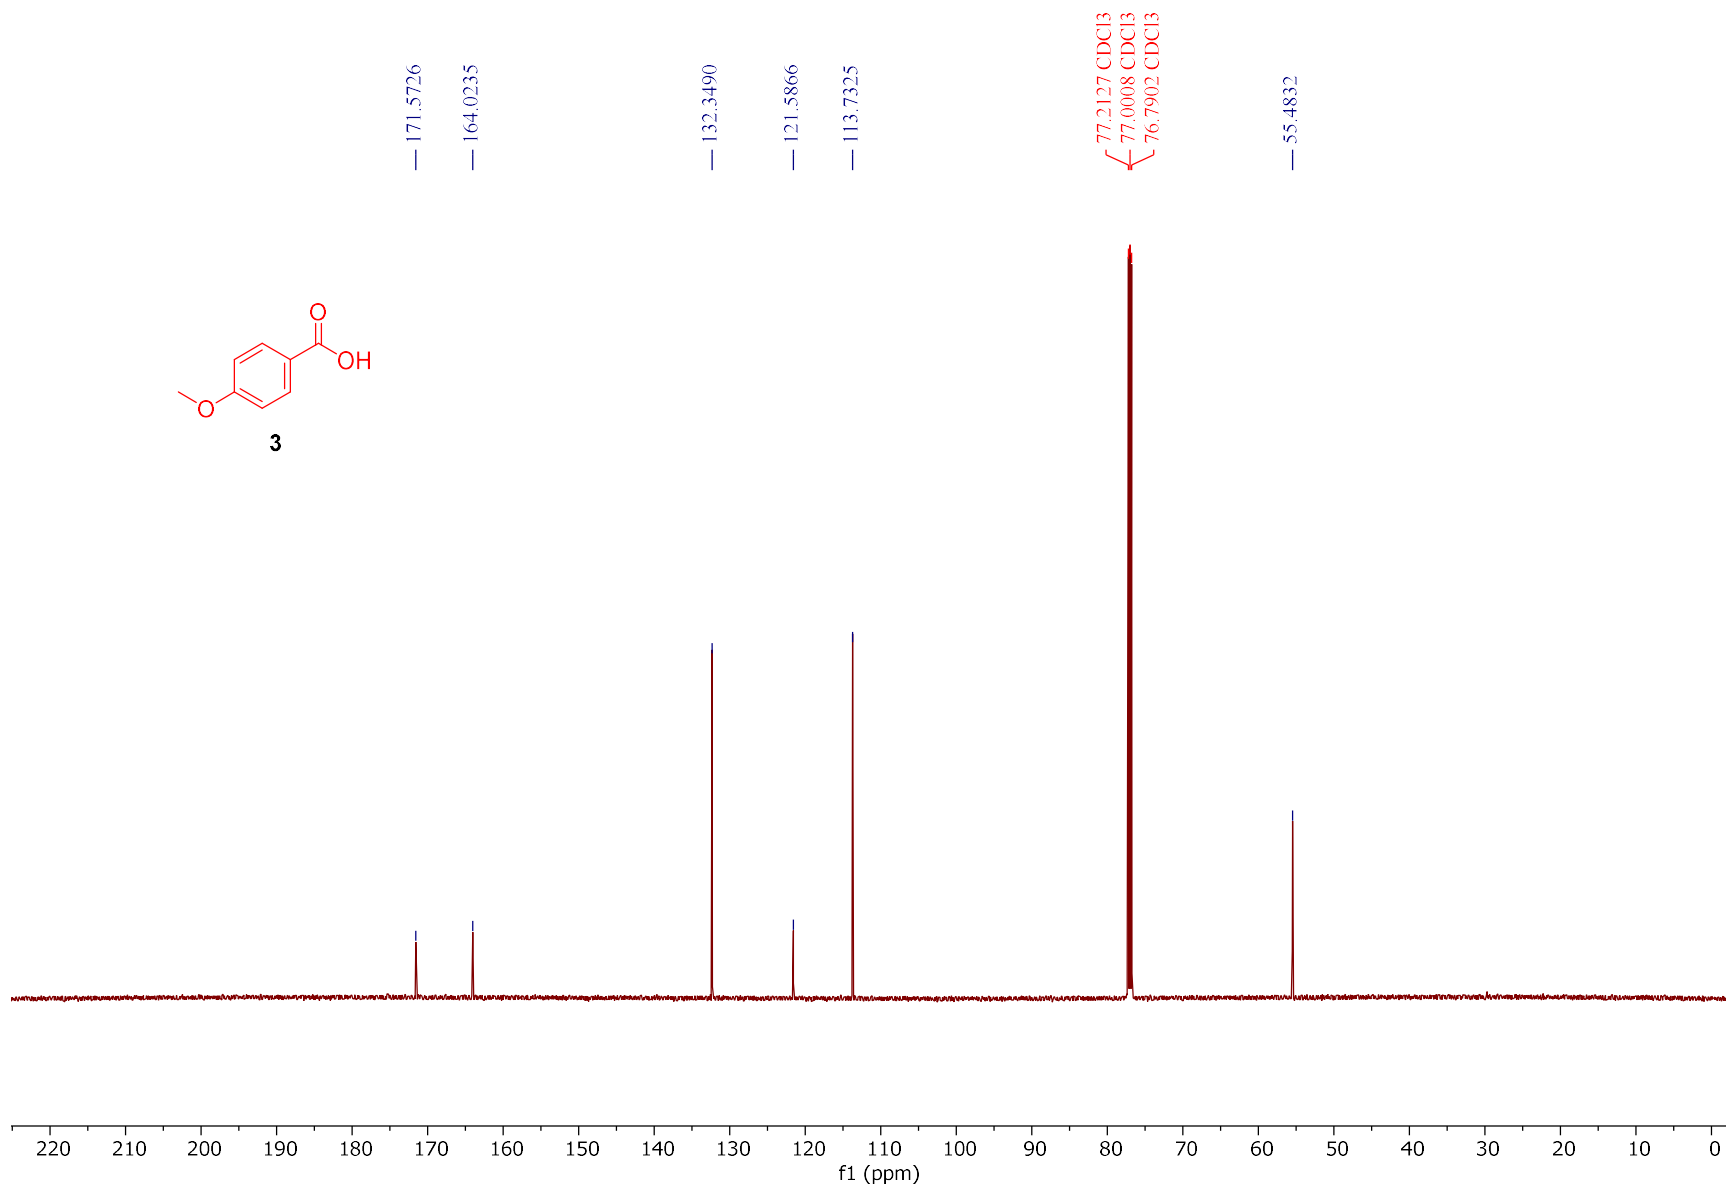

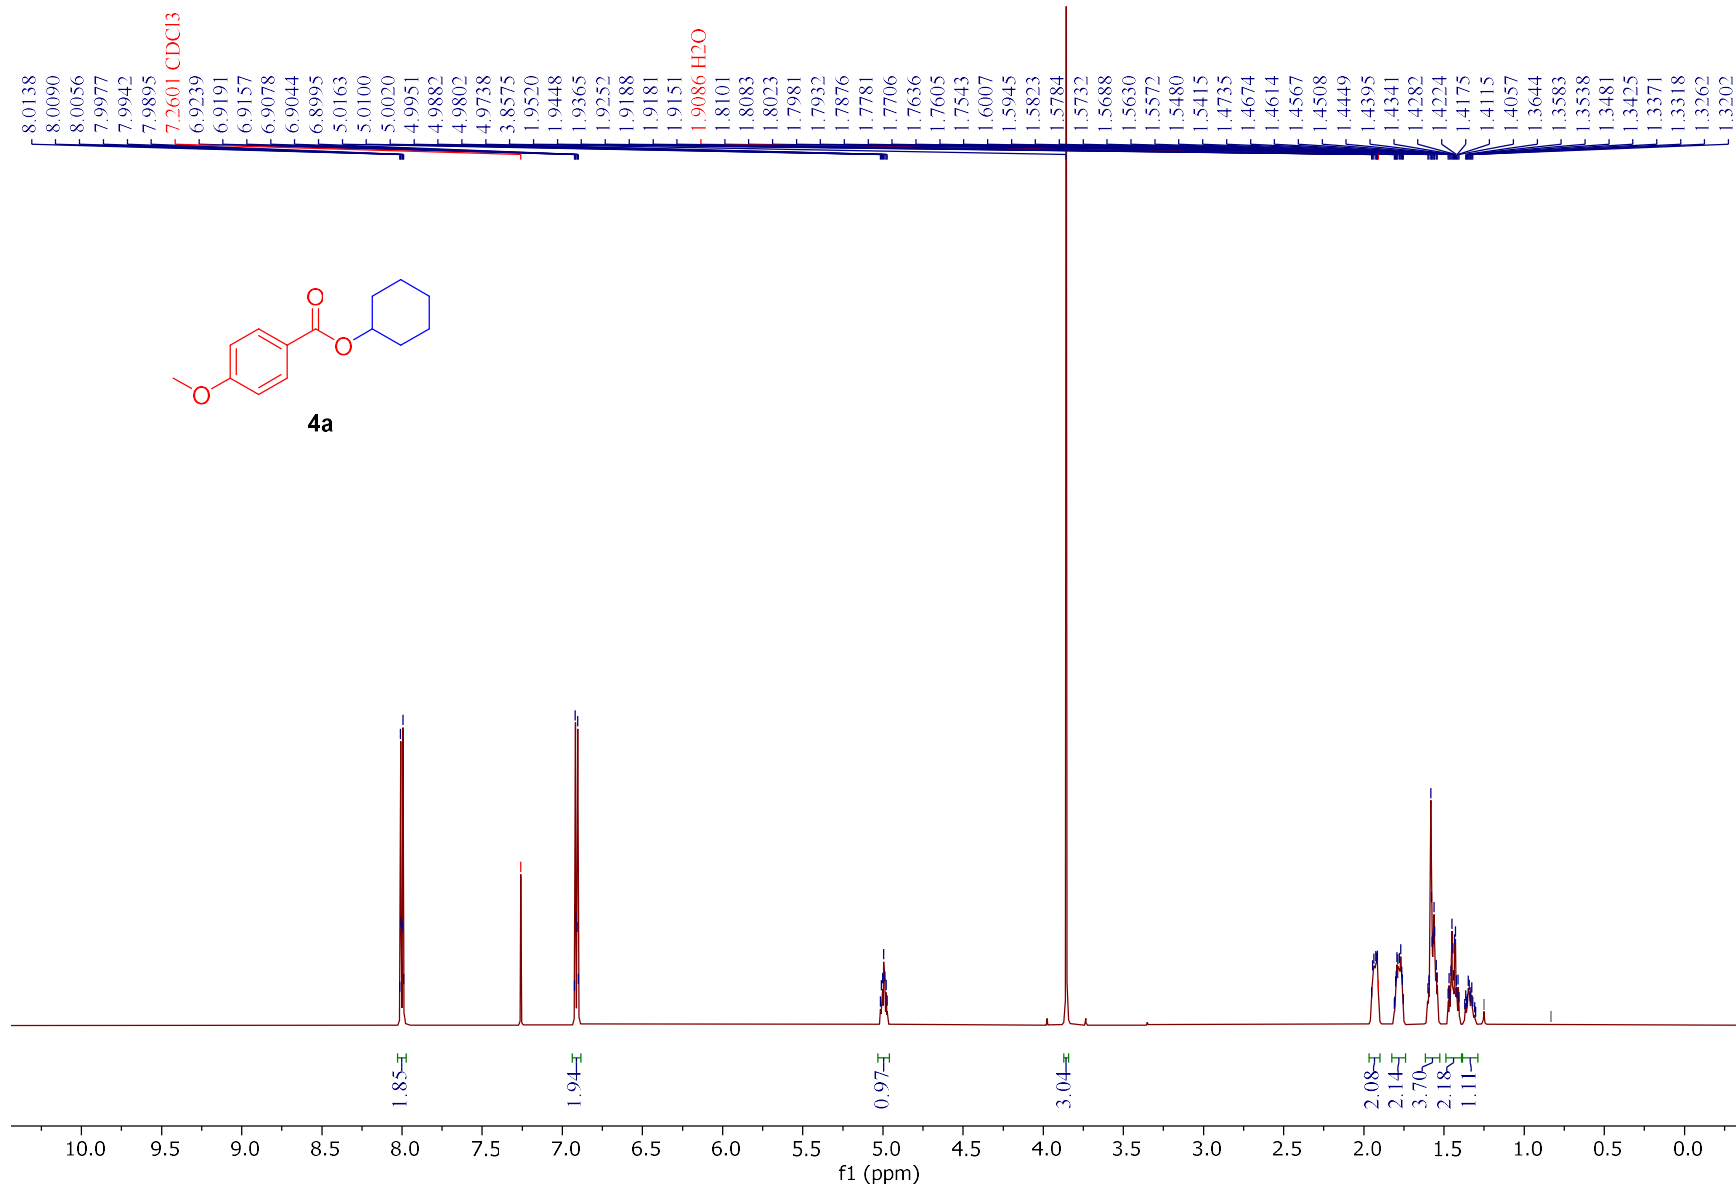

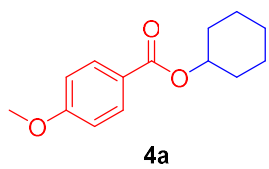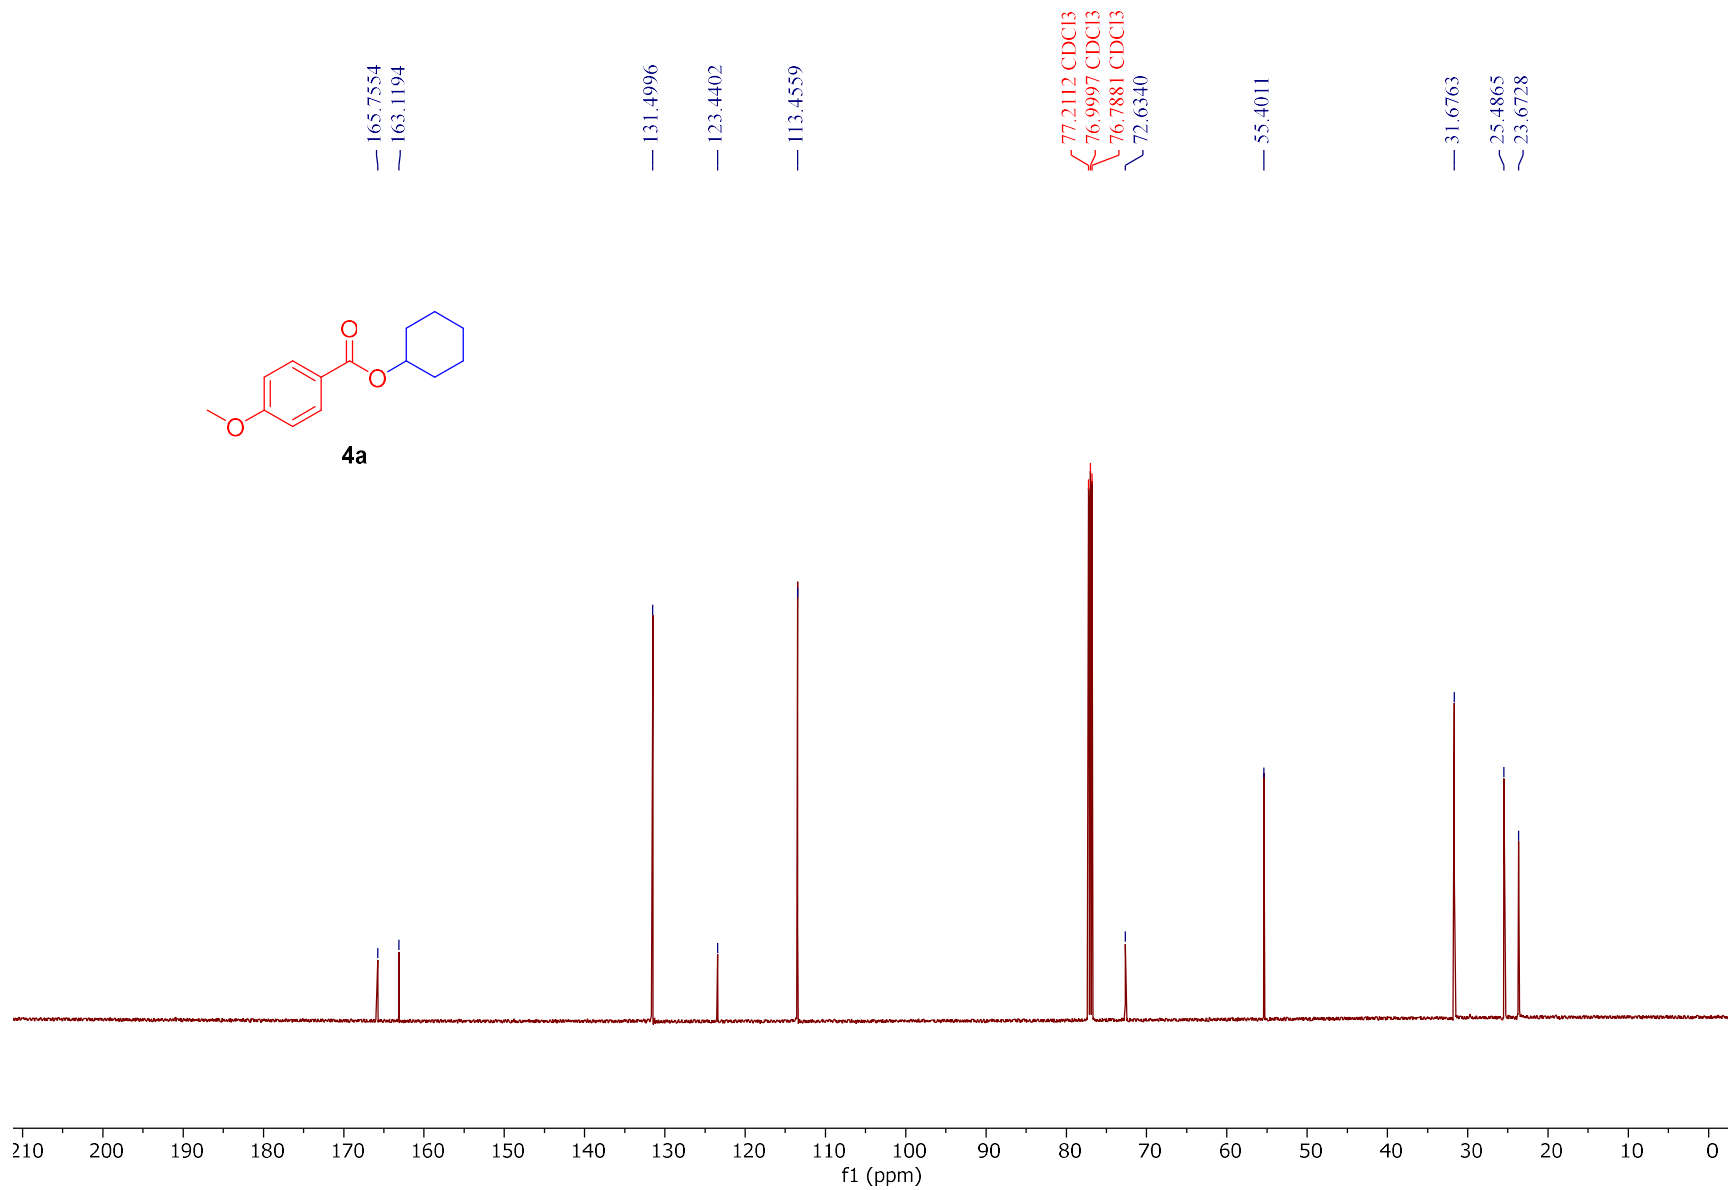

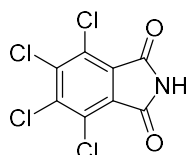

S33

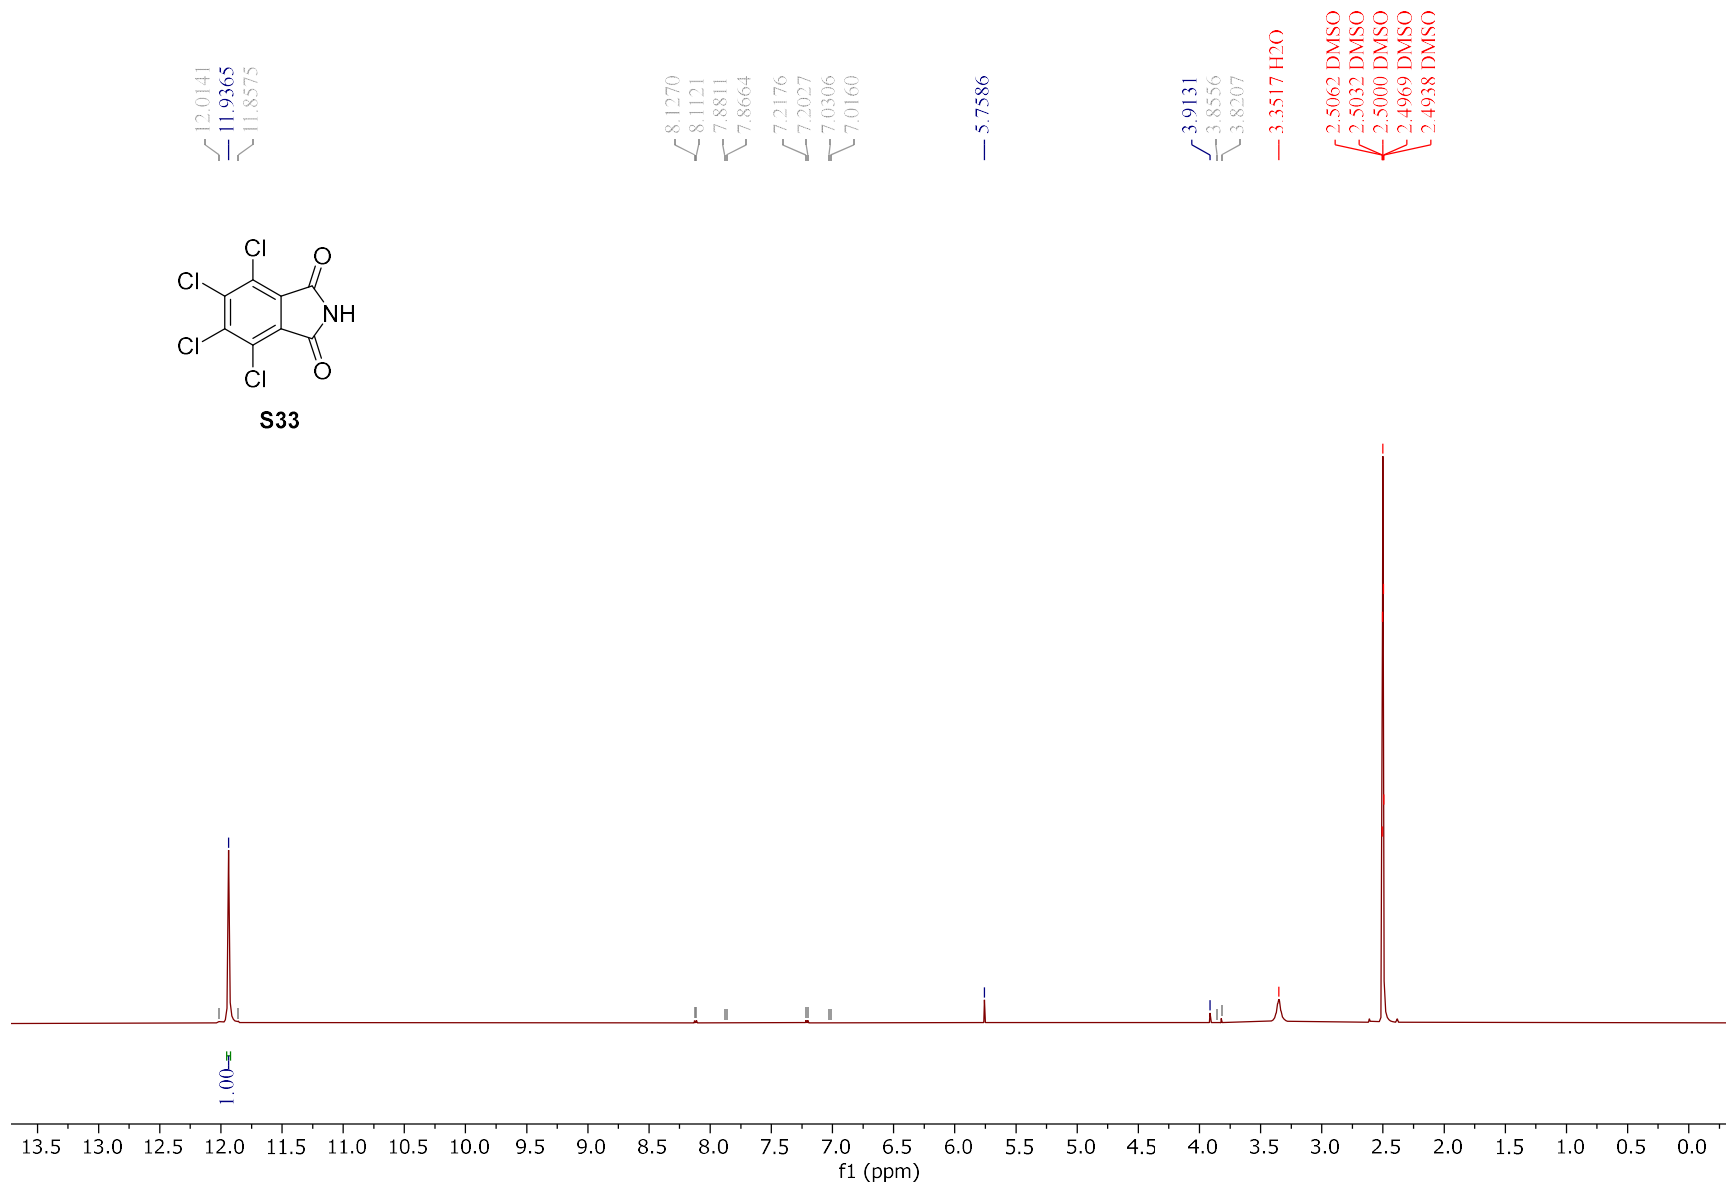

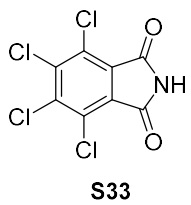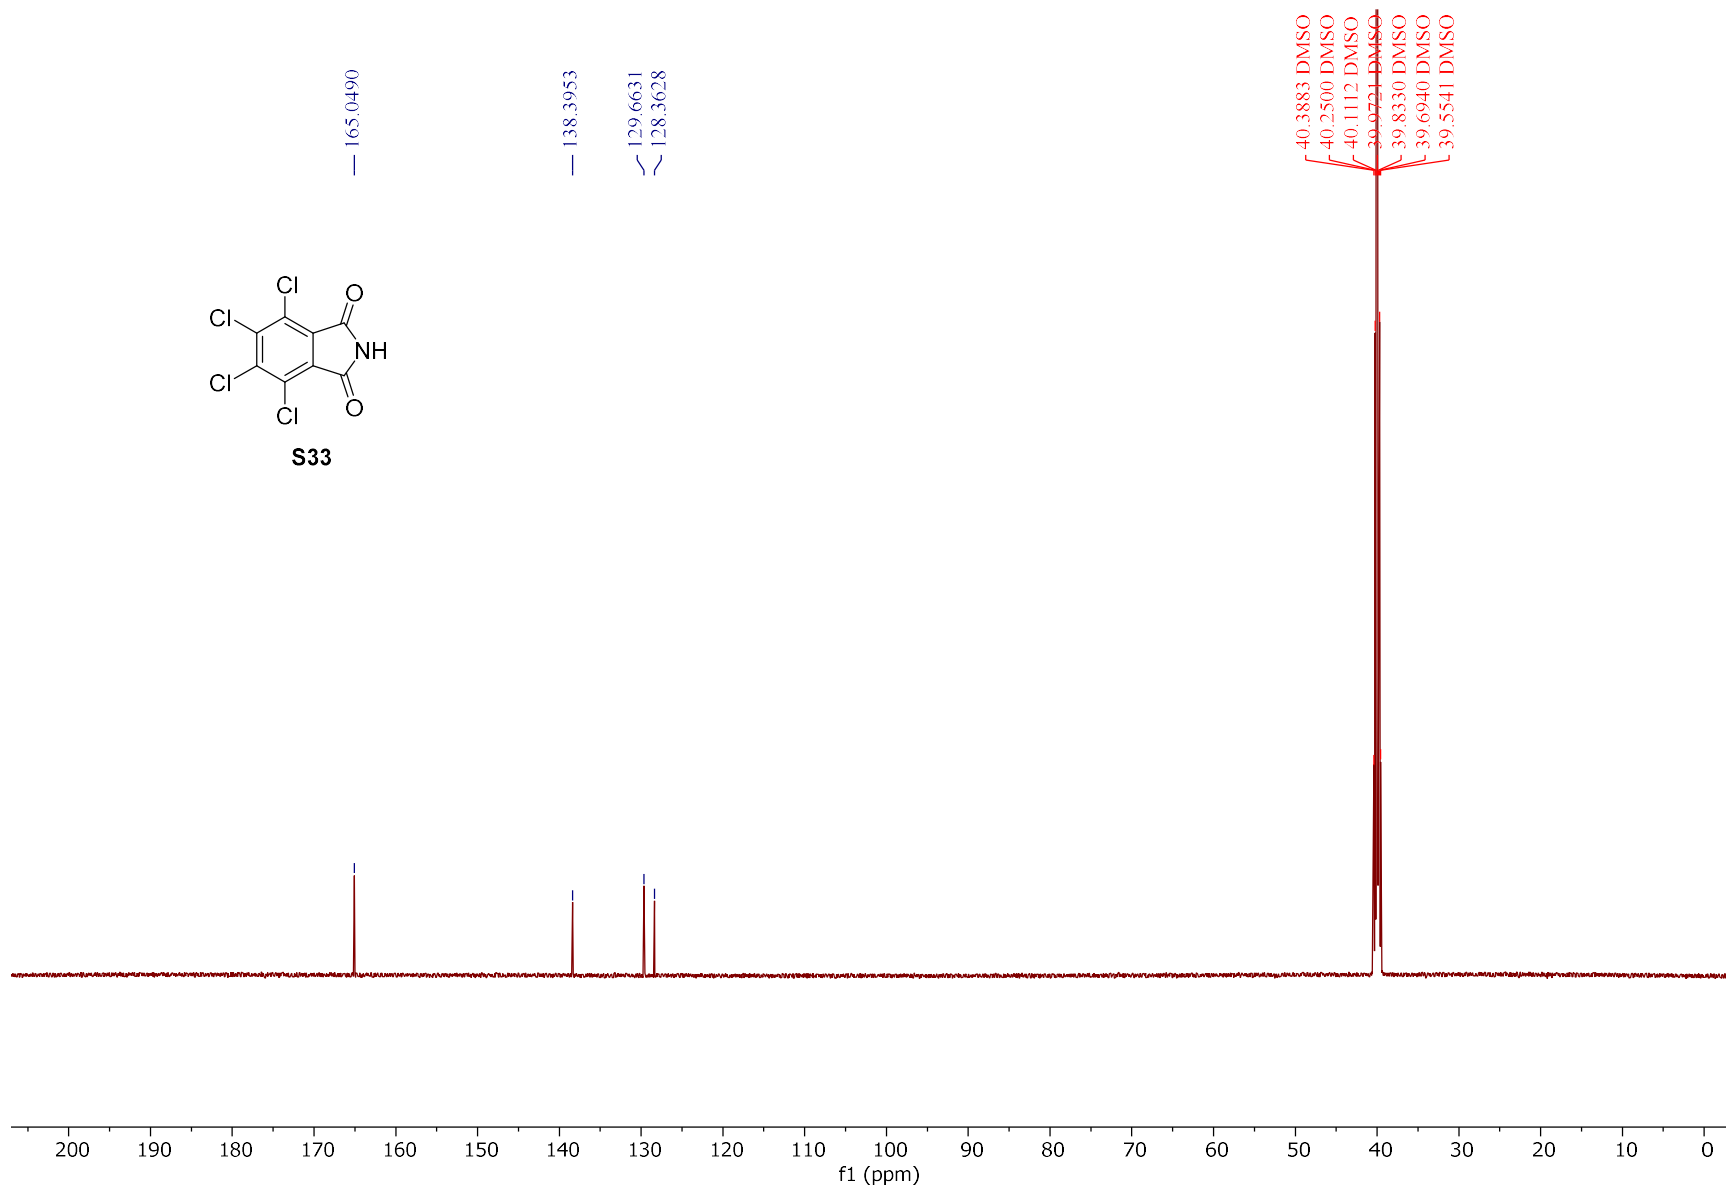

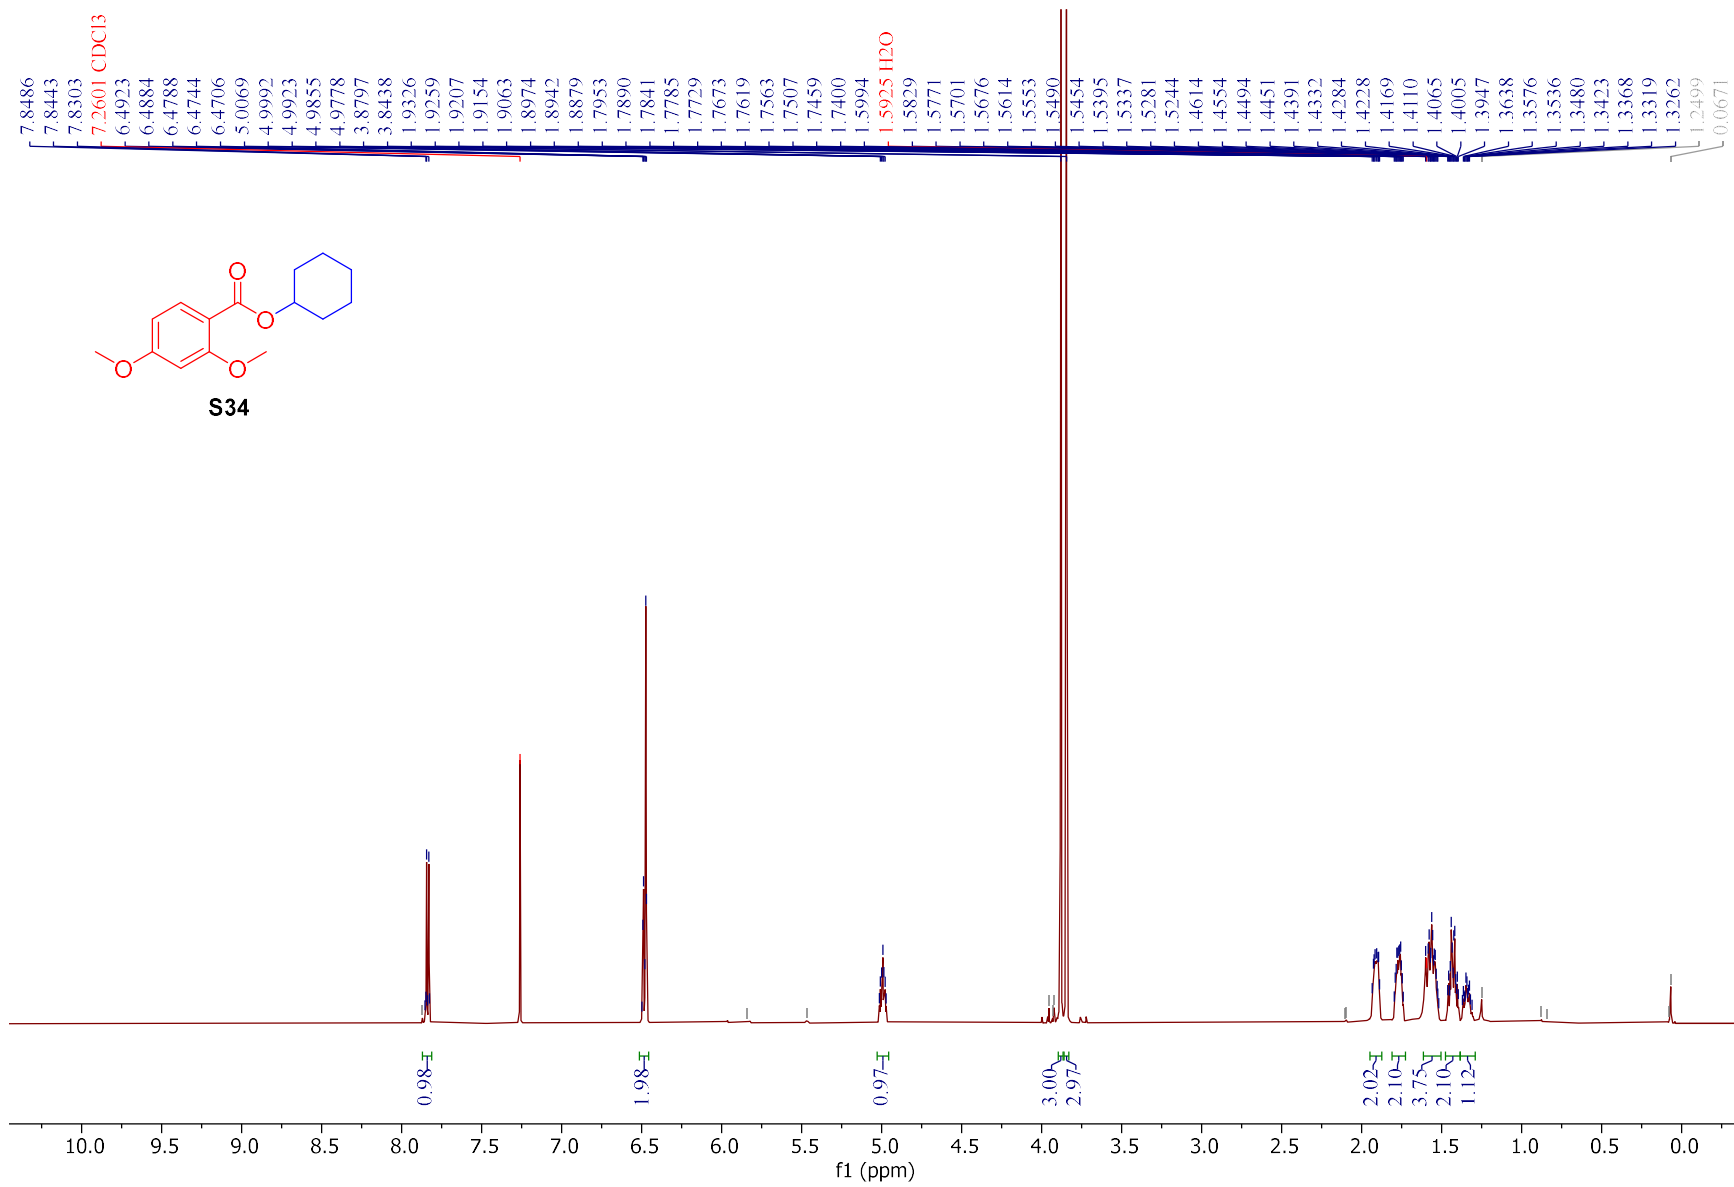



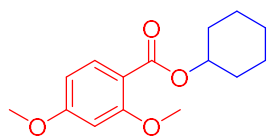

S34

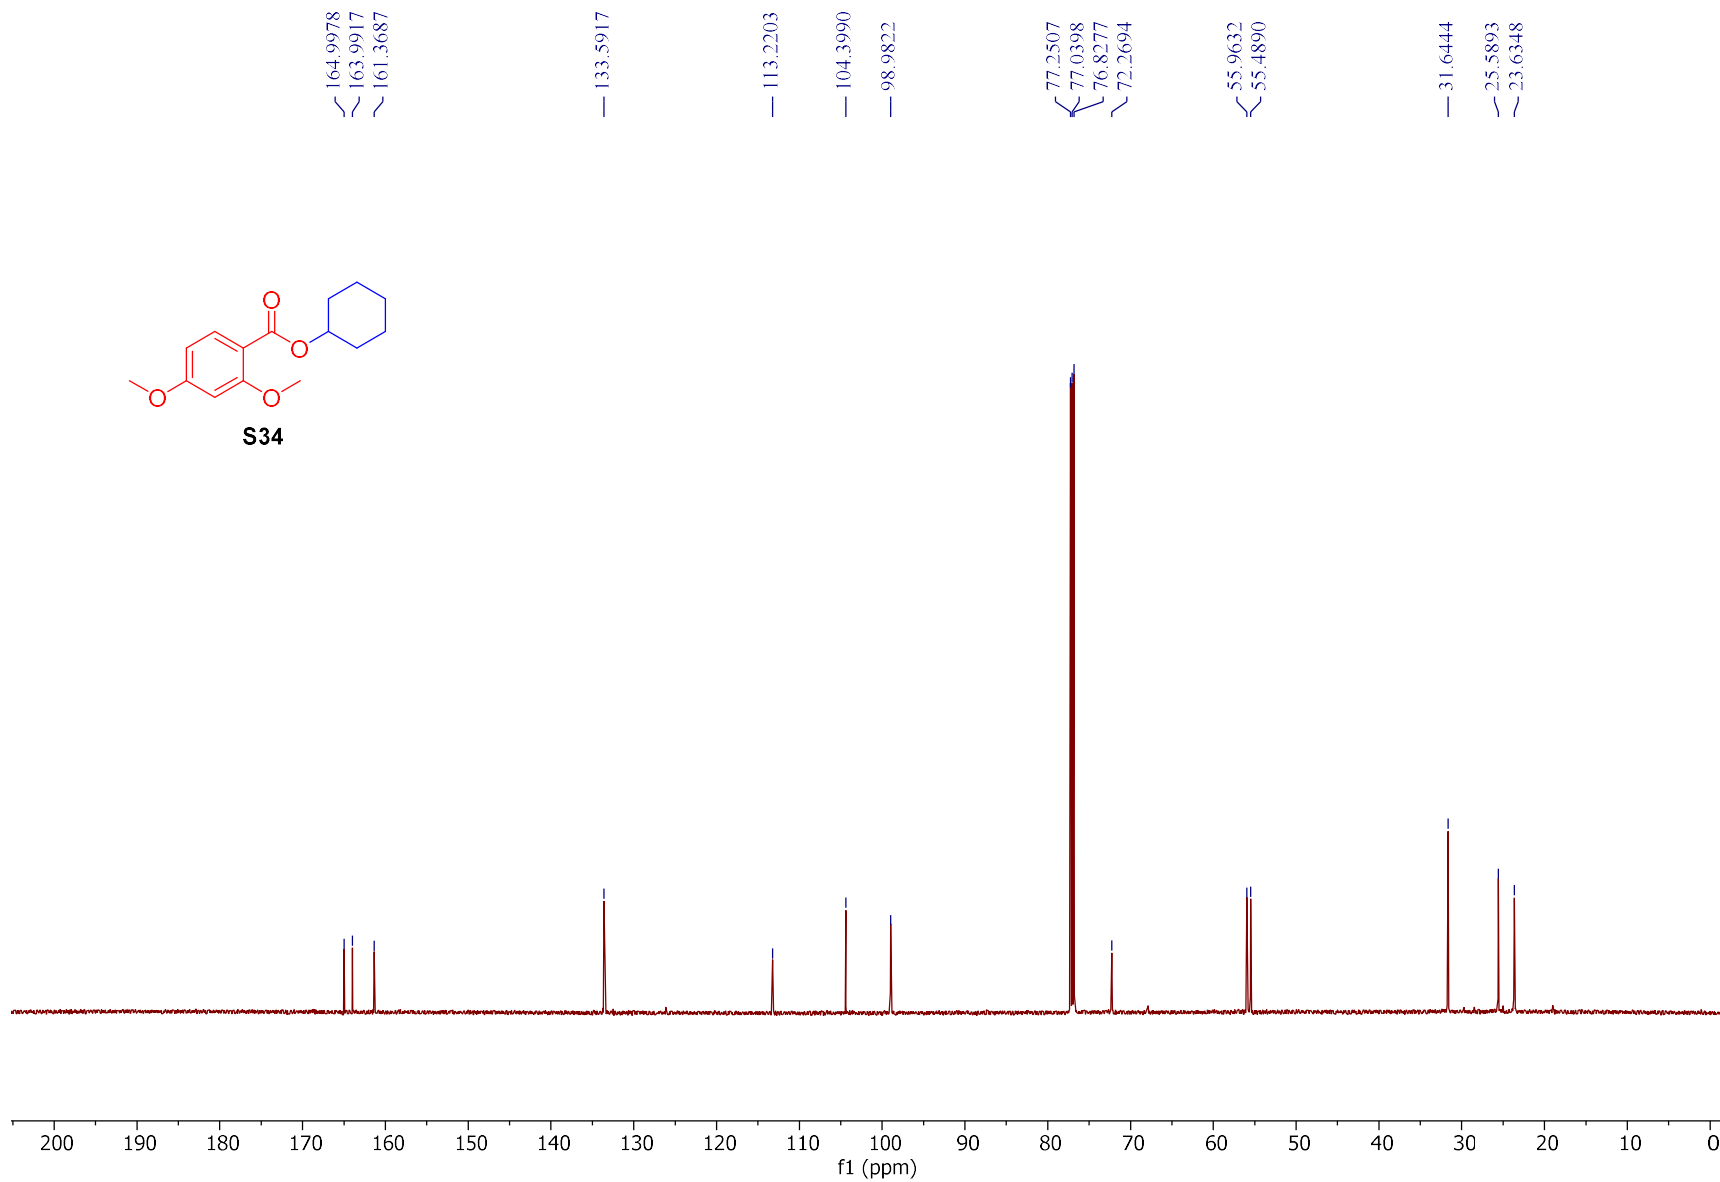

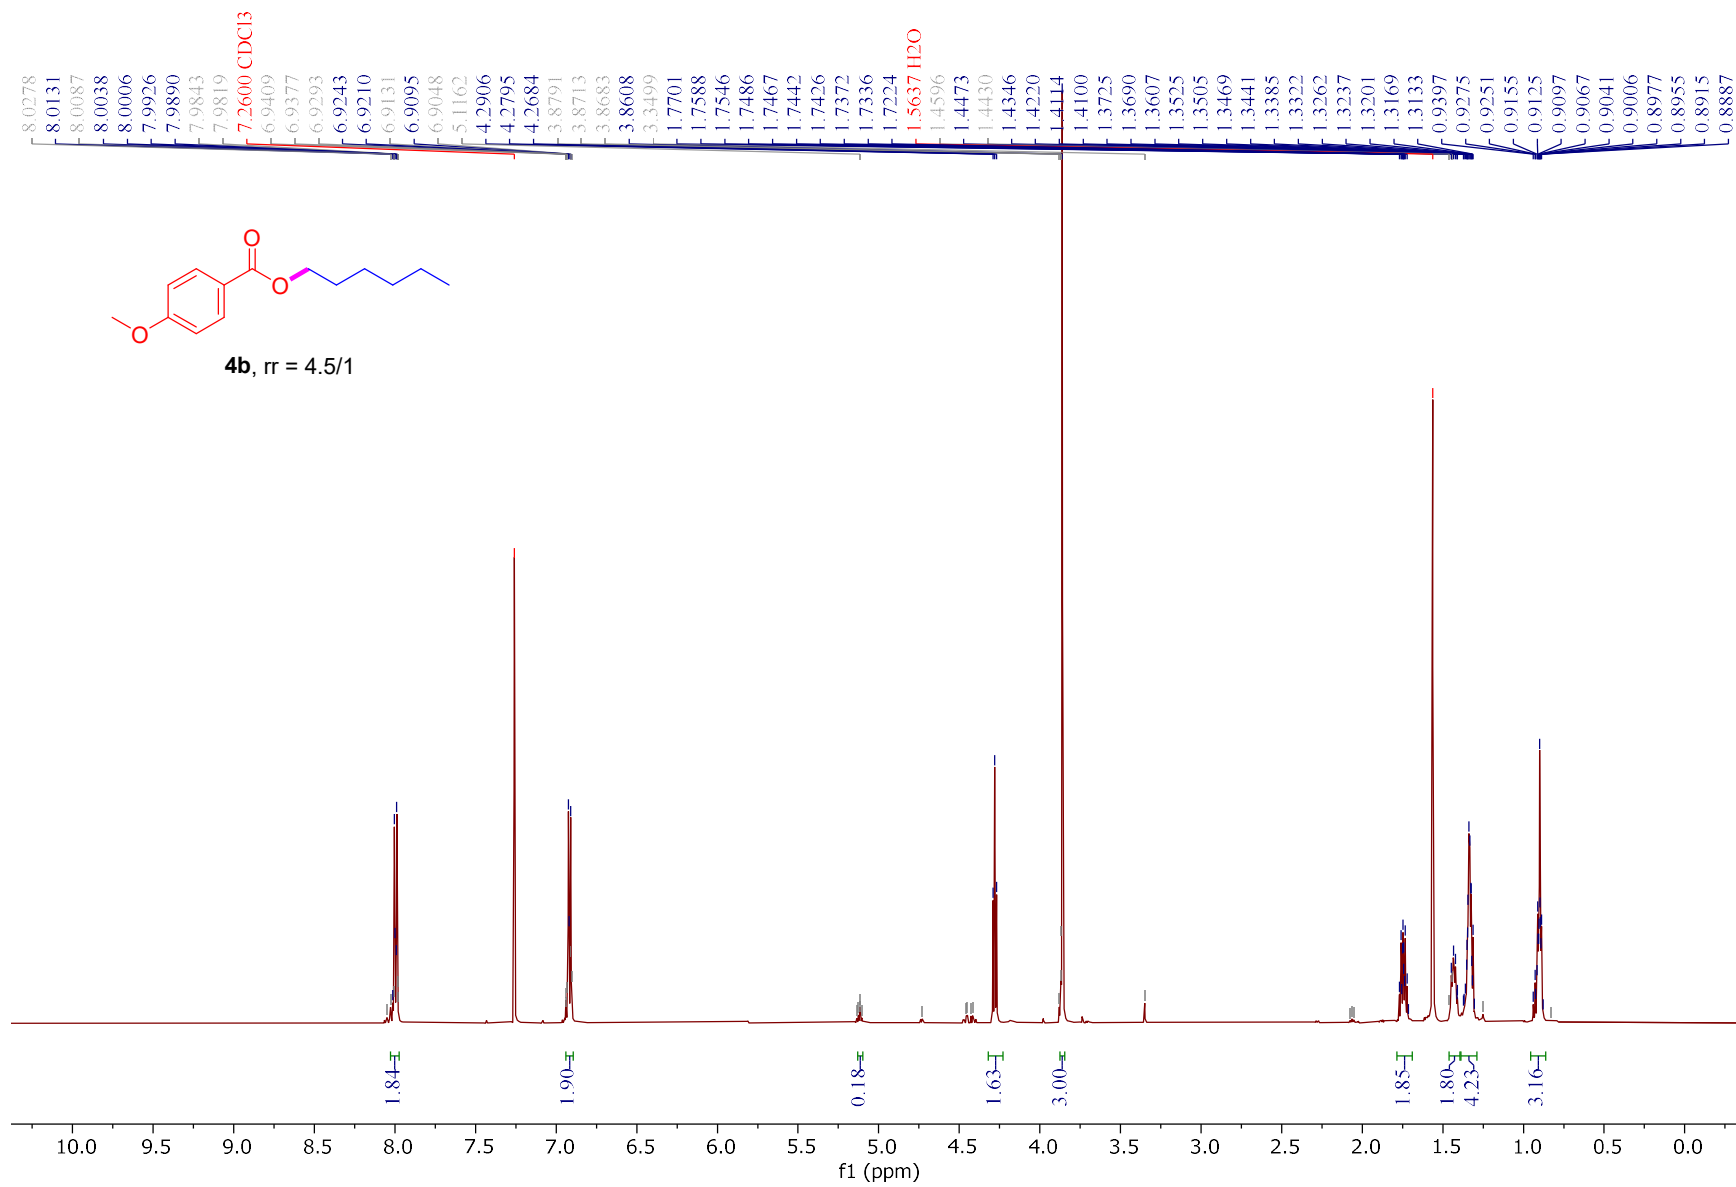

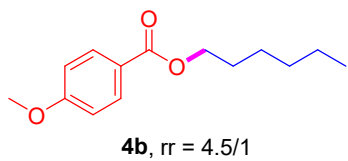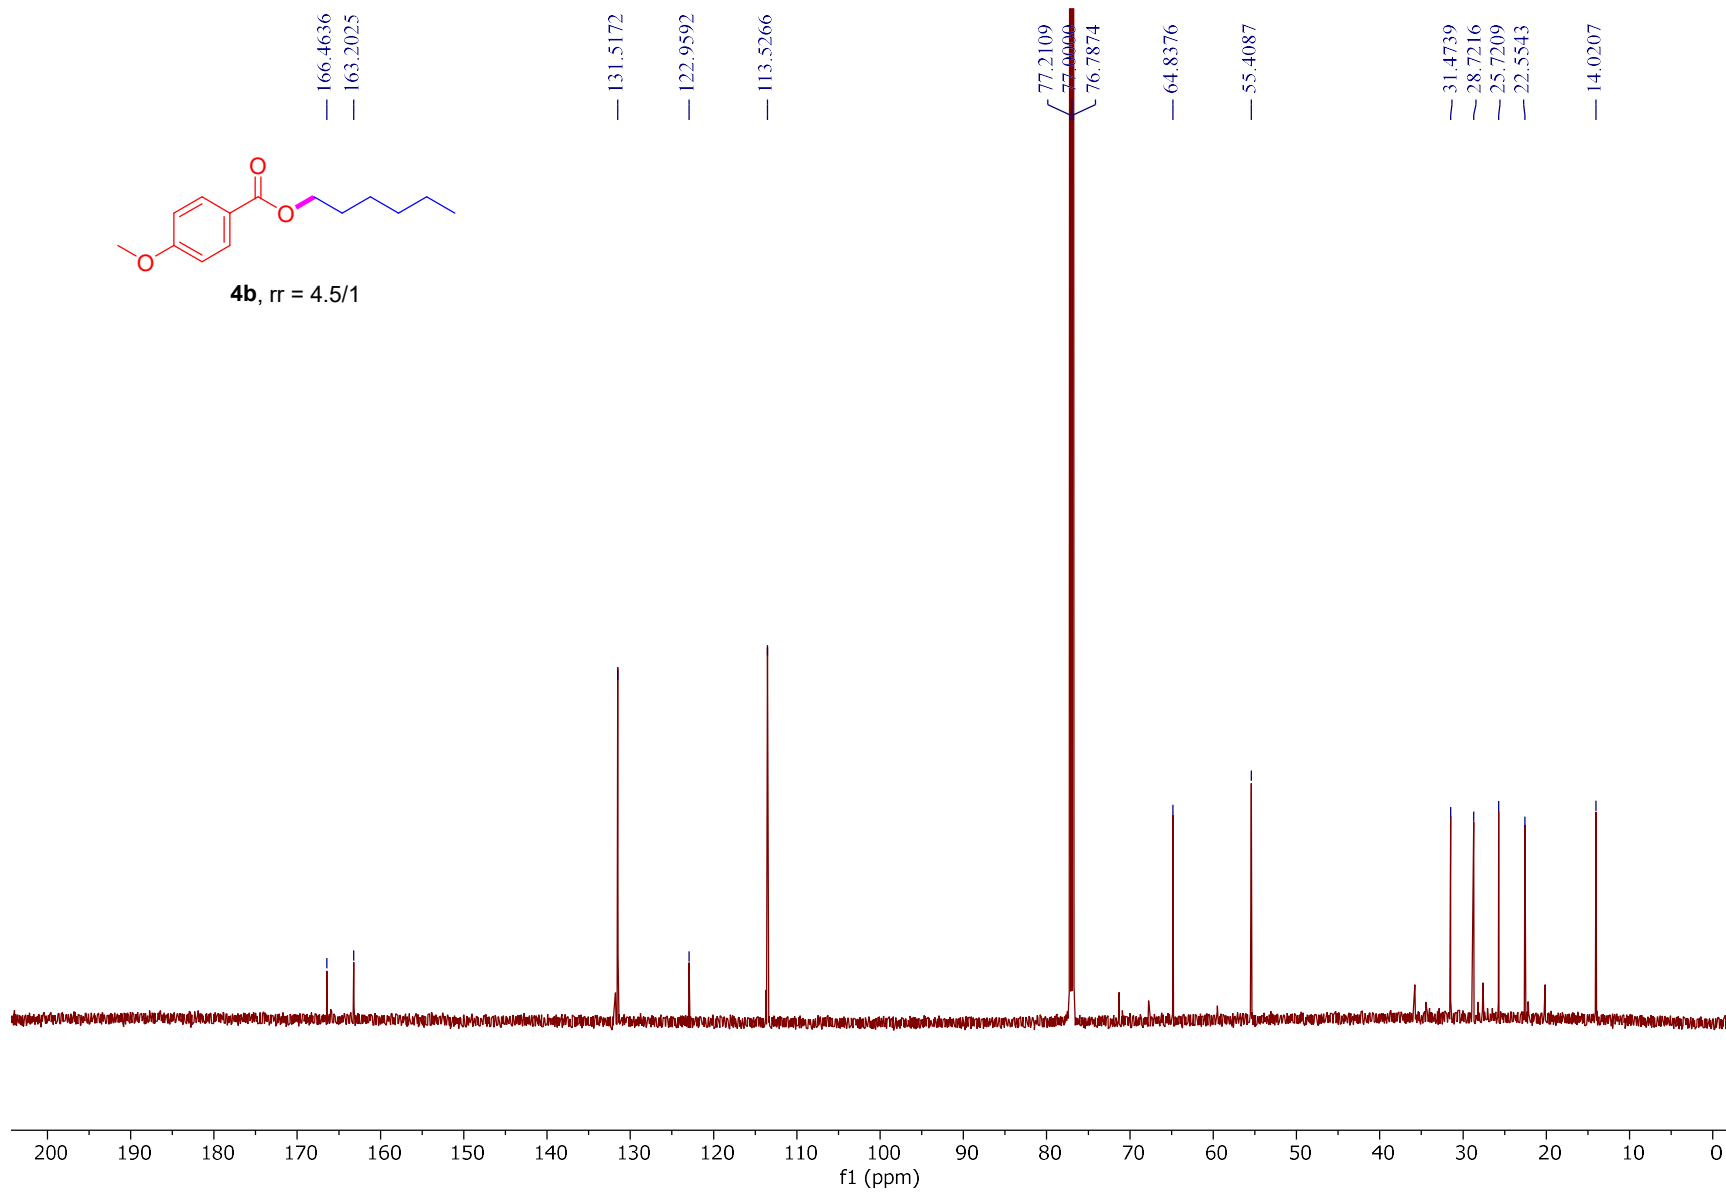

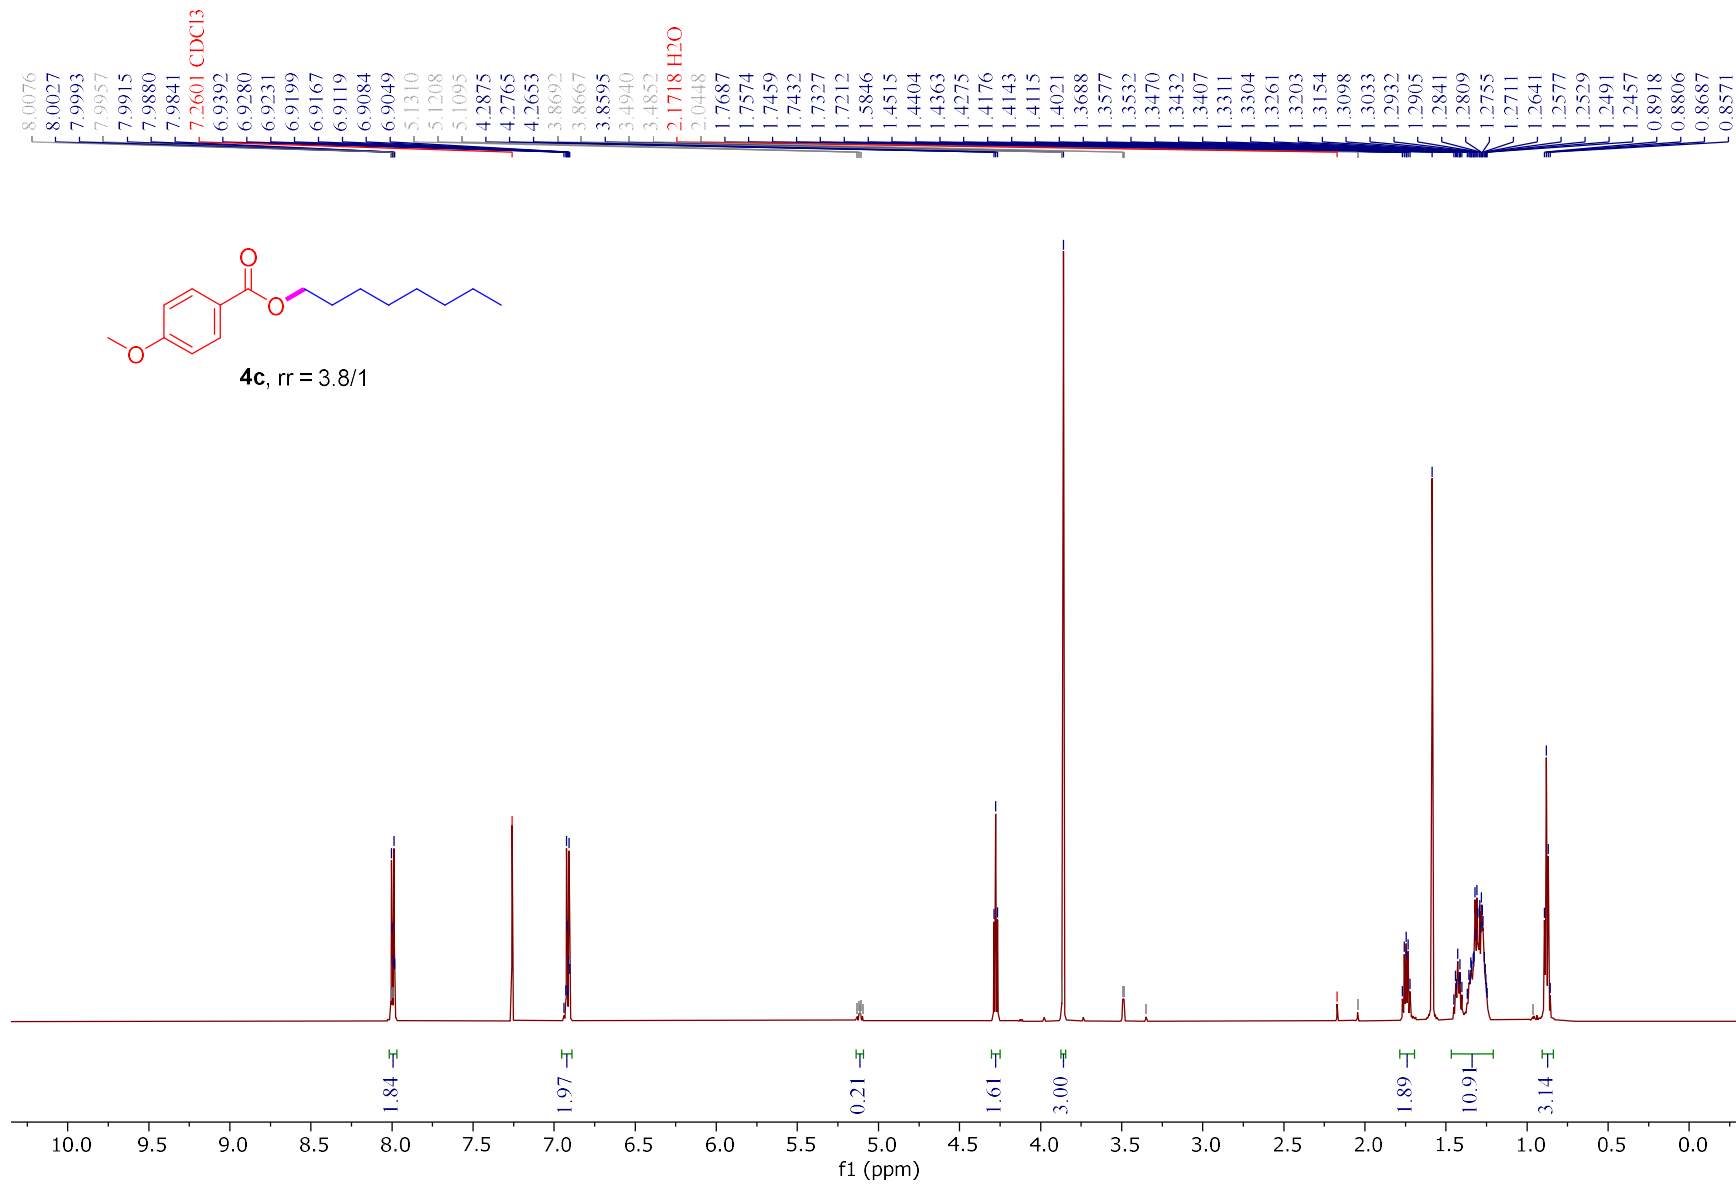

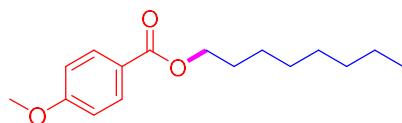

**4c**, rr = 3.8/1

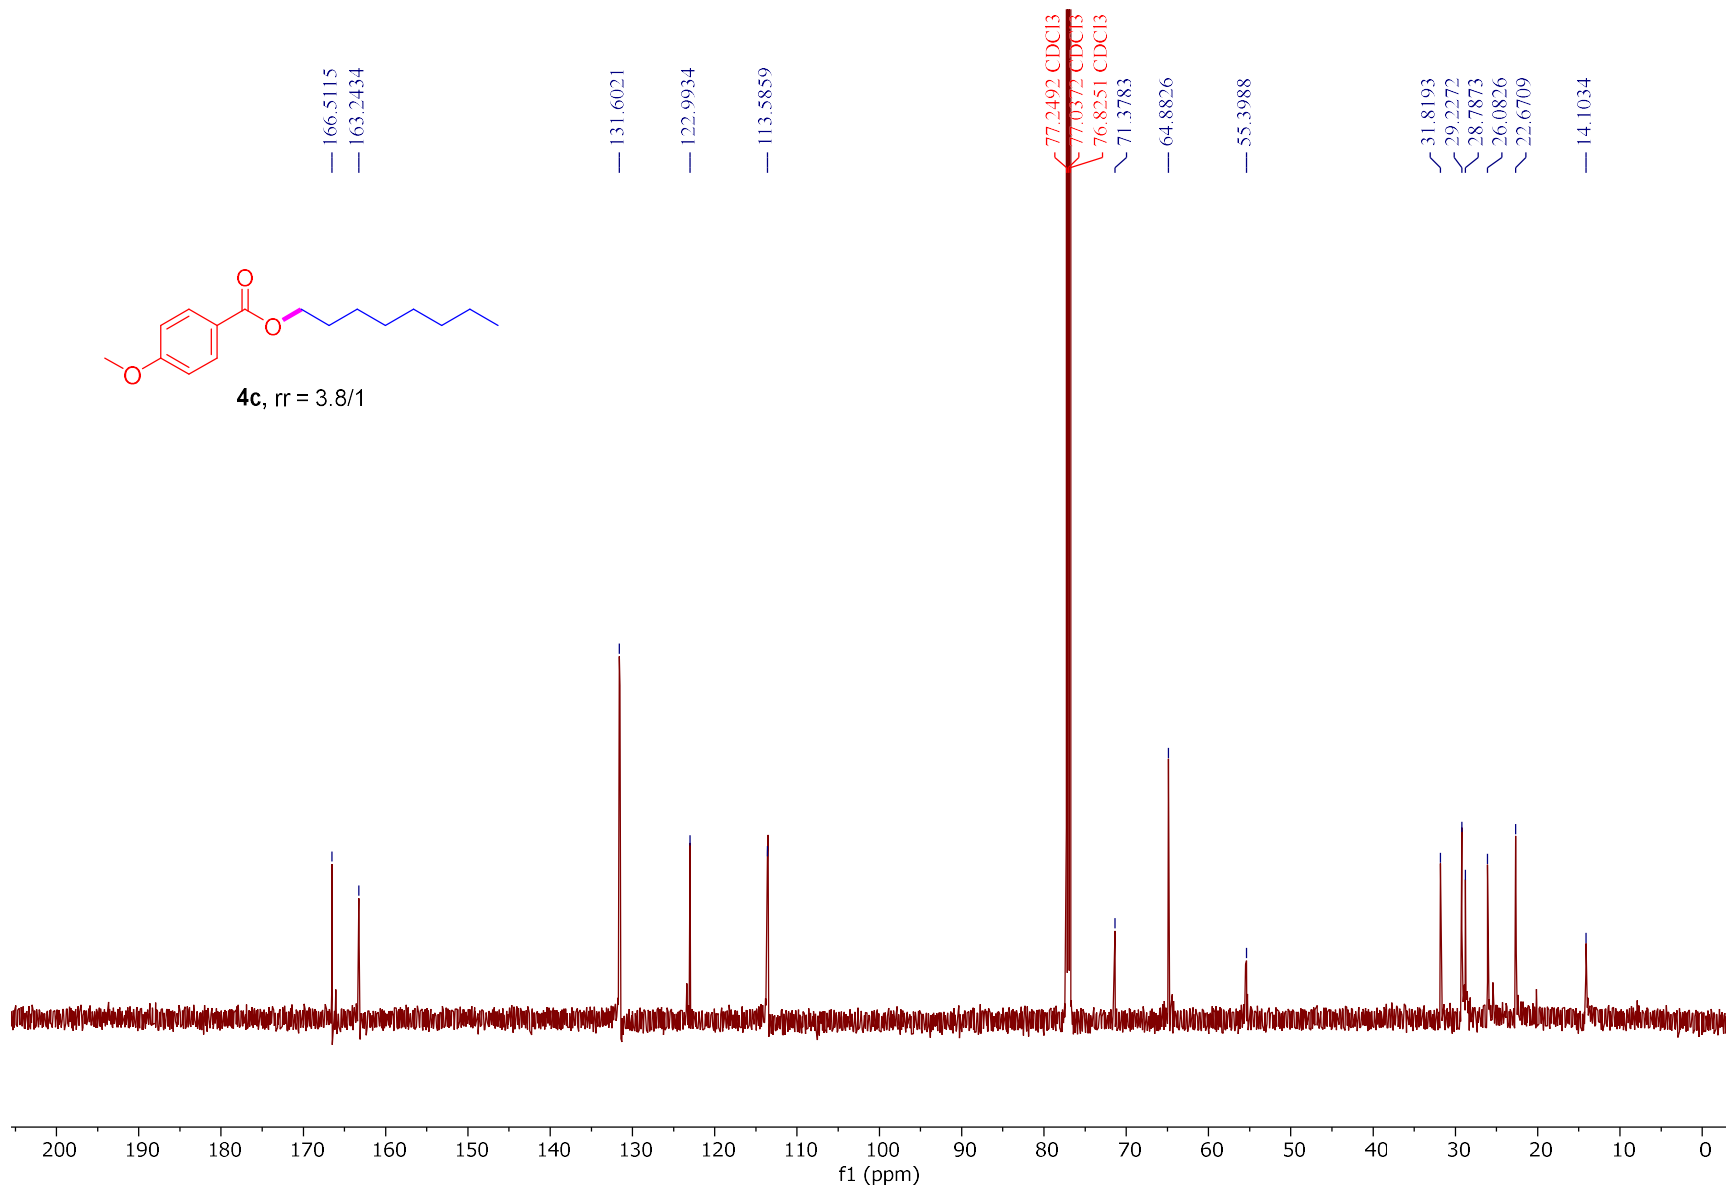

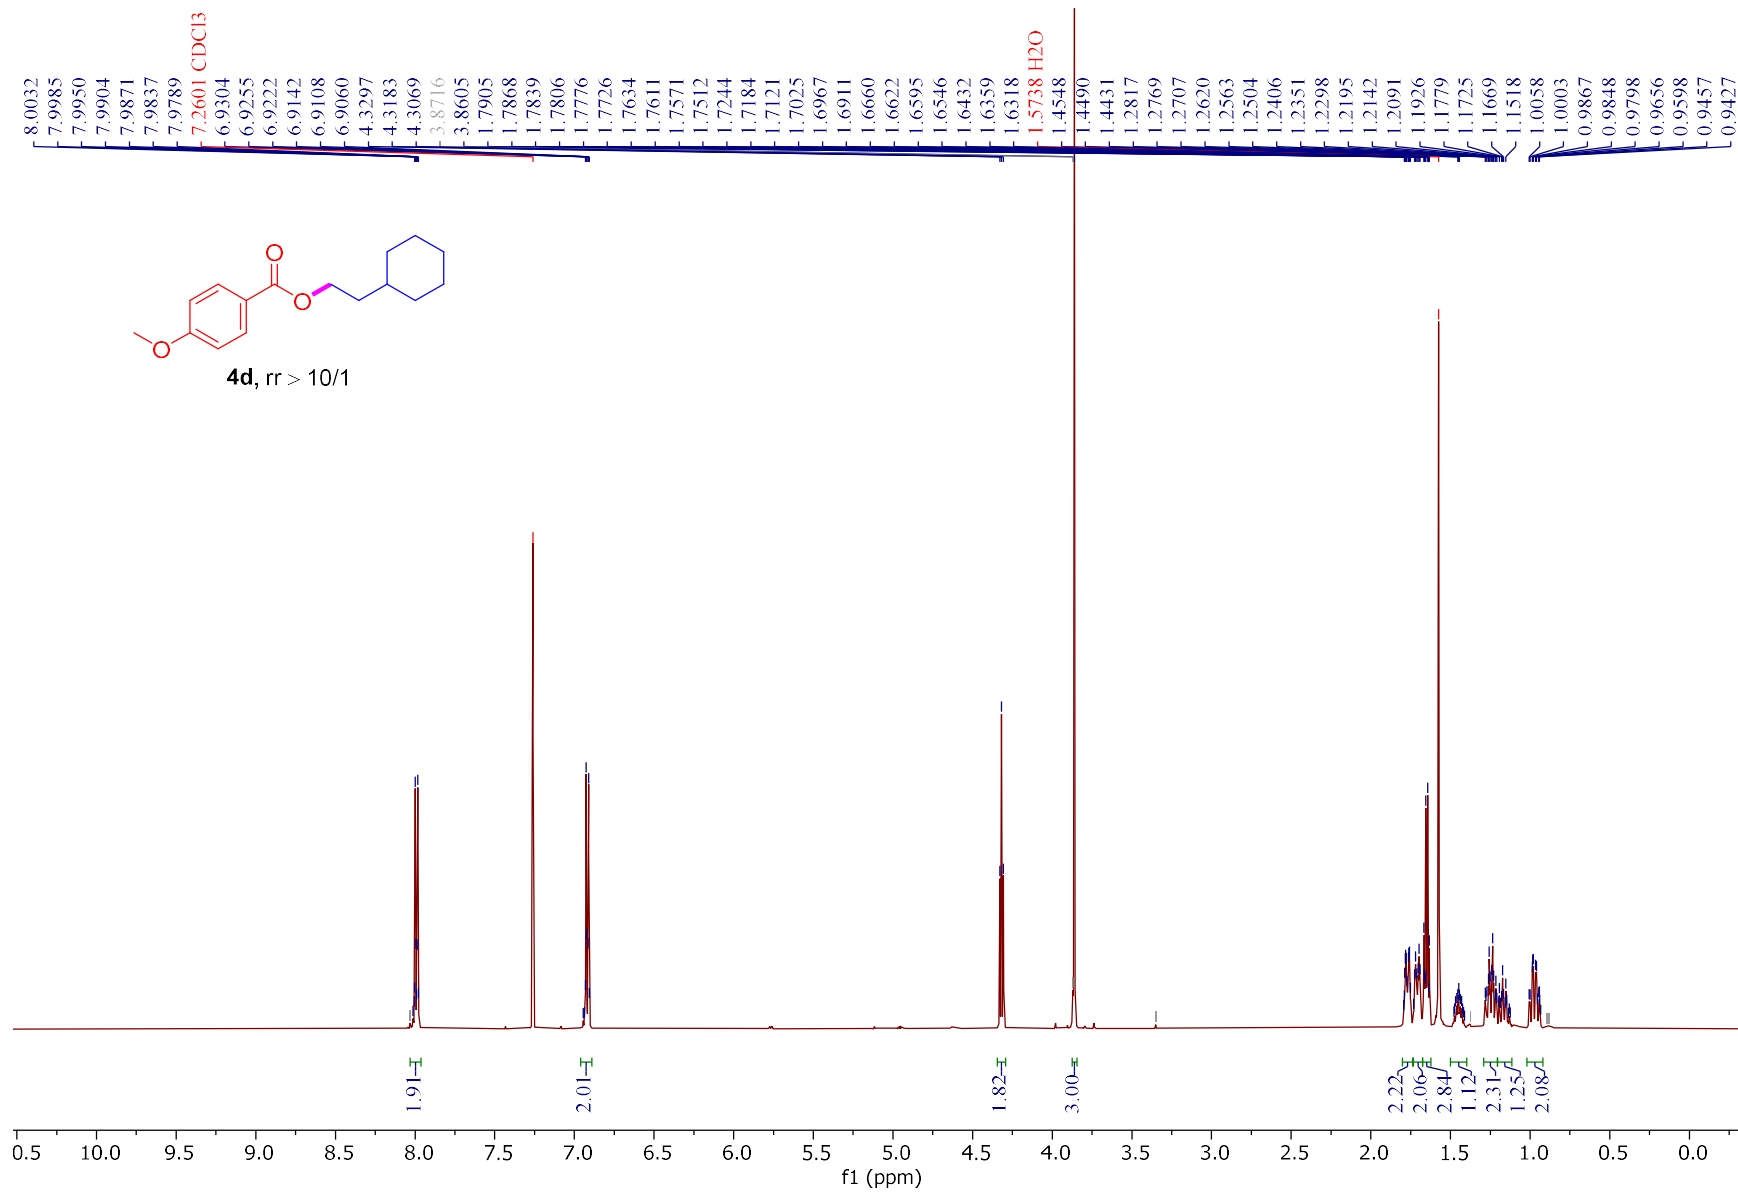

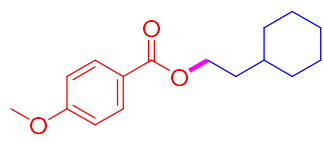

4d, rr > 10/1

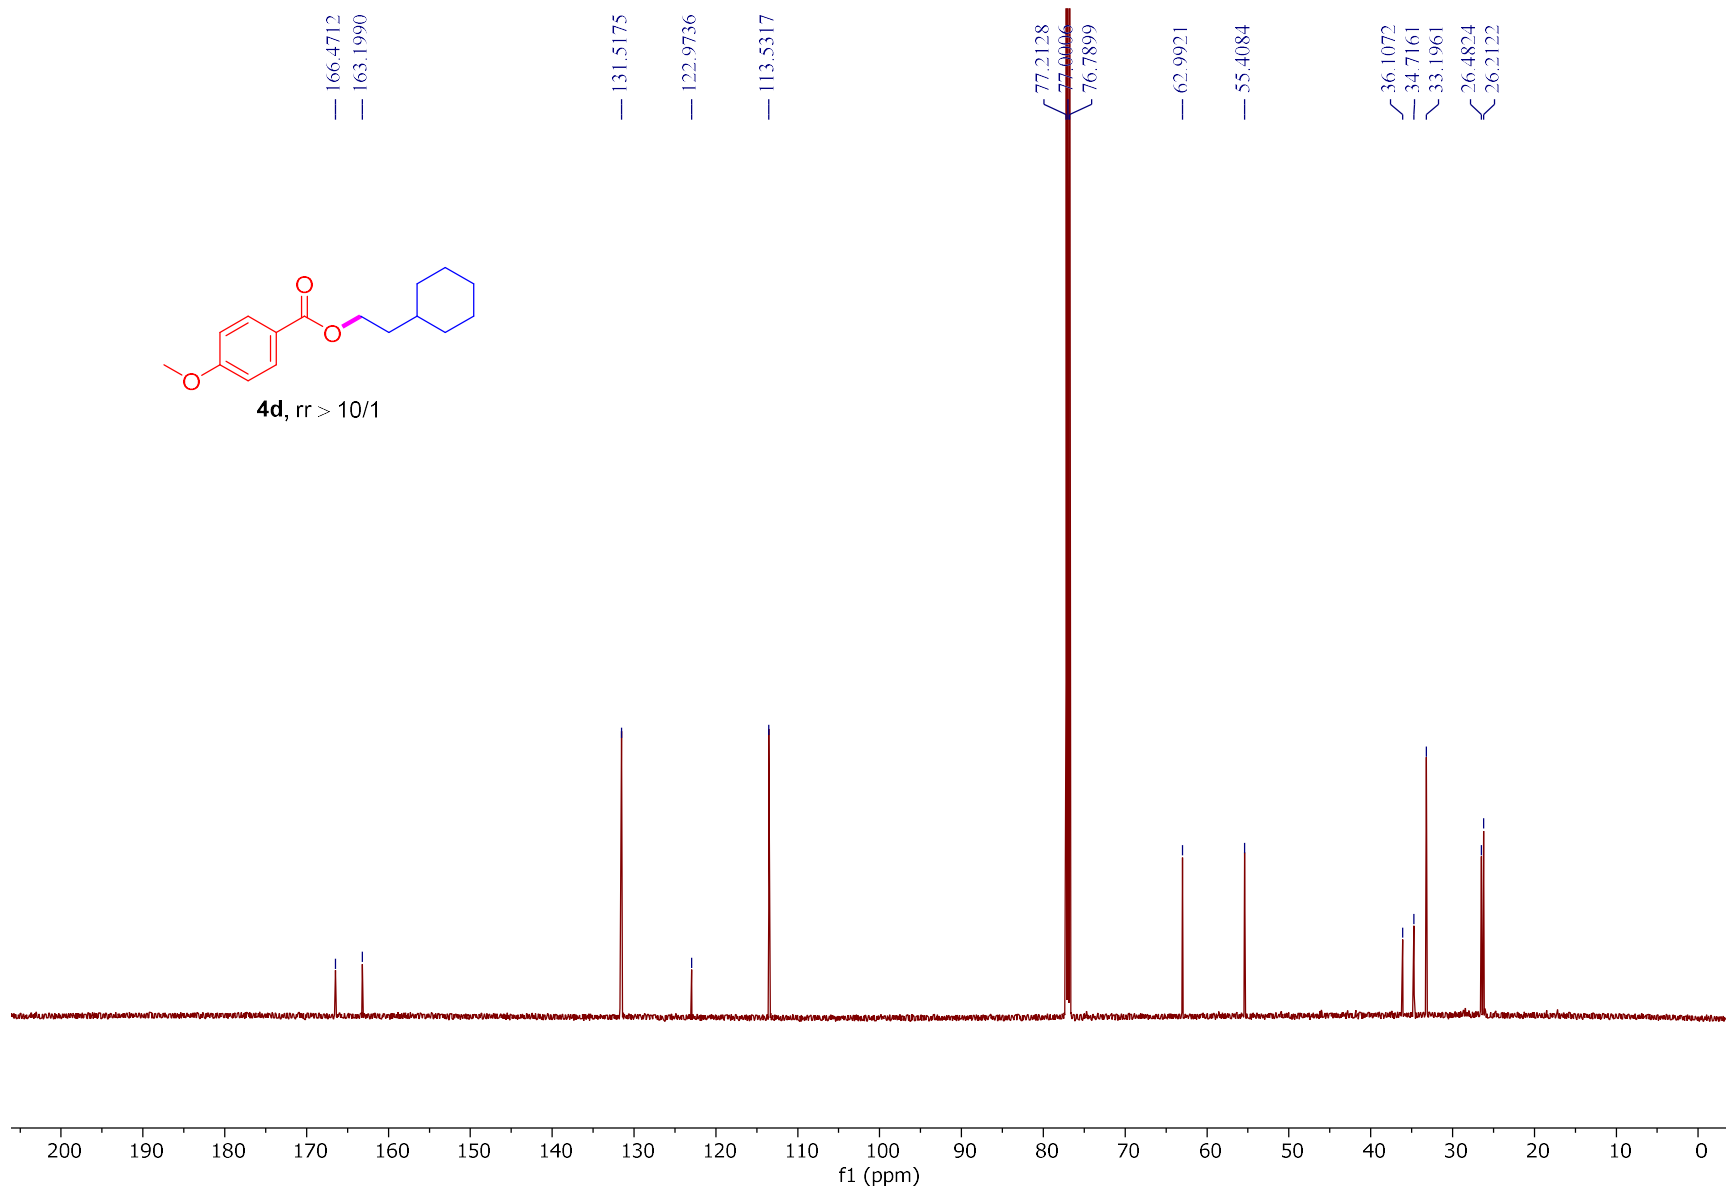

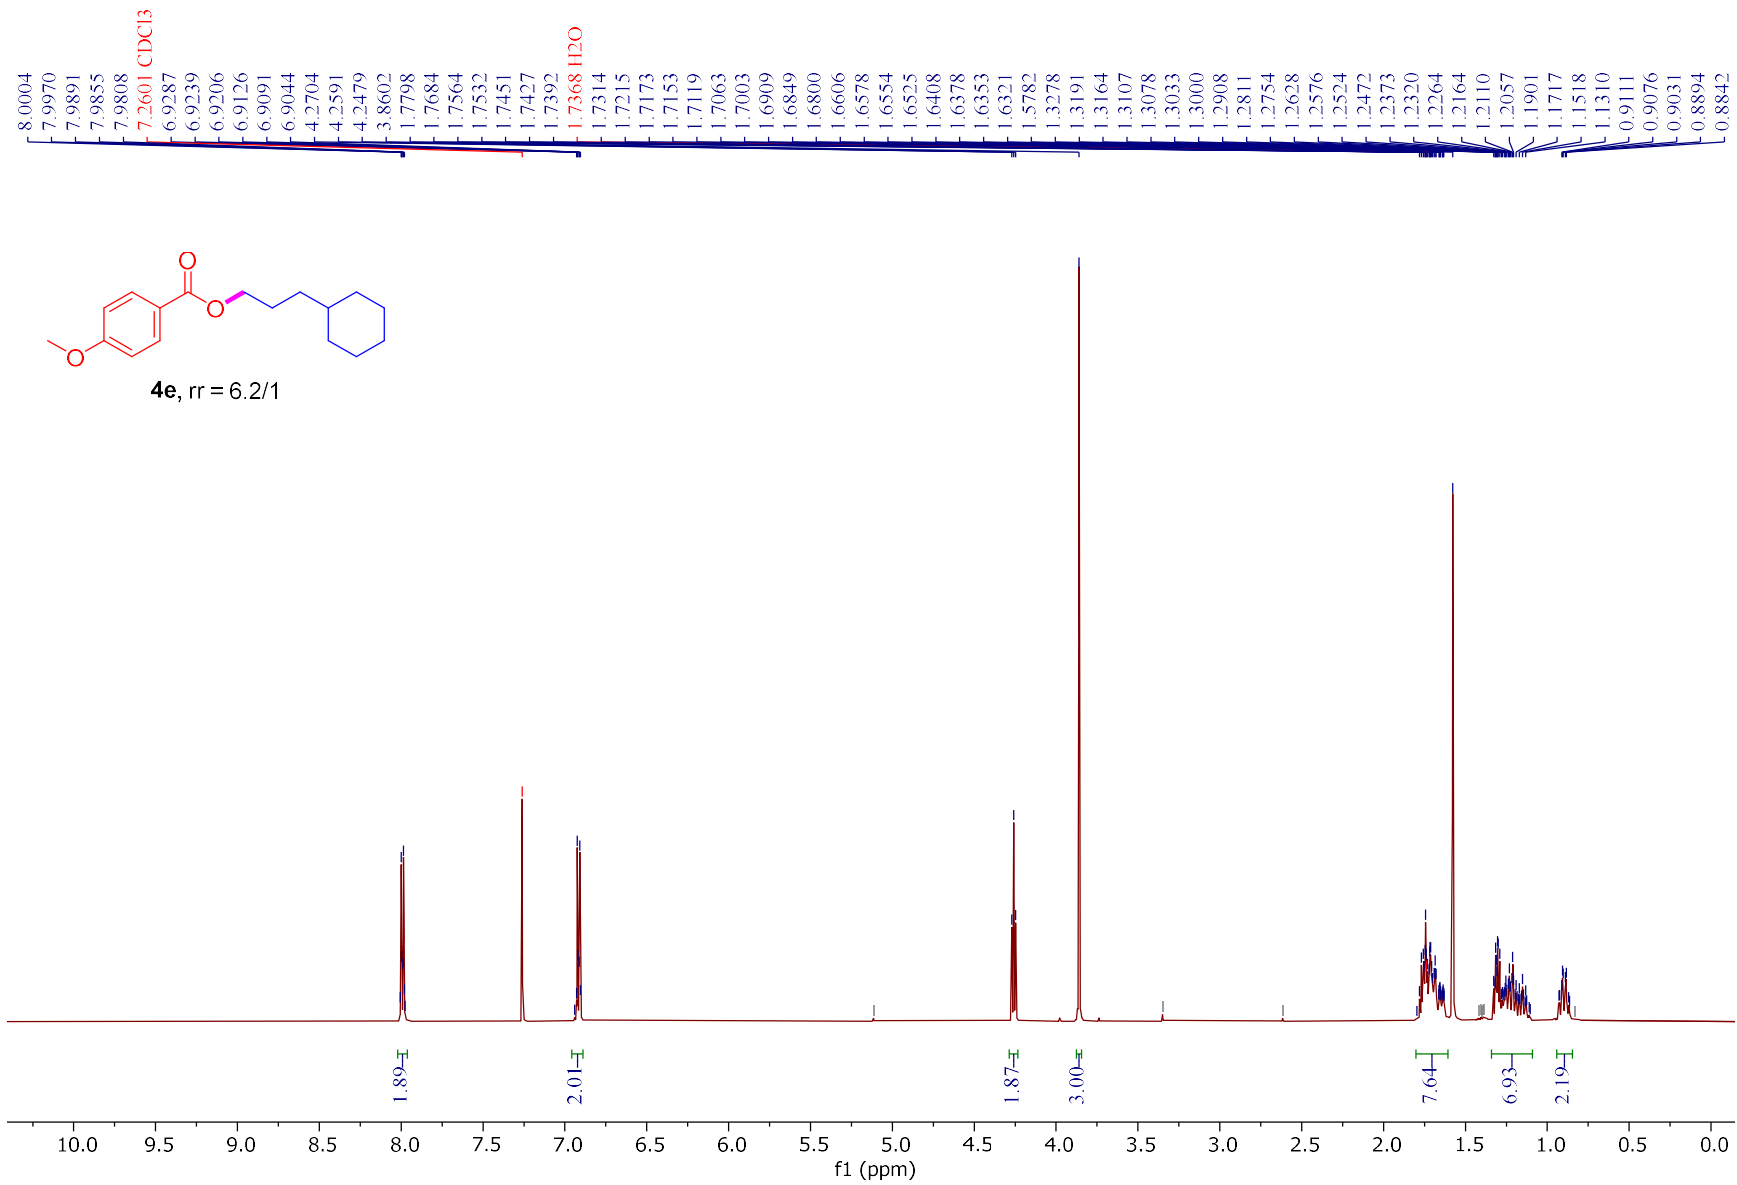



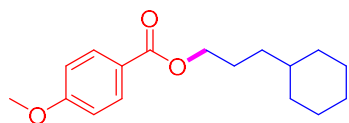

**4e**, rr = 6.2/1

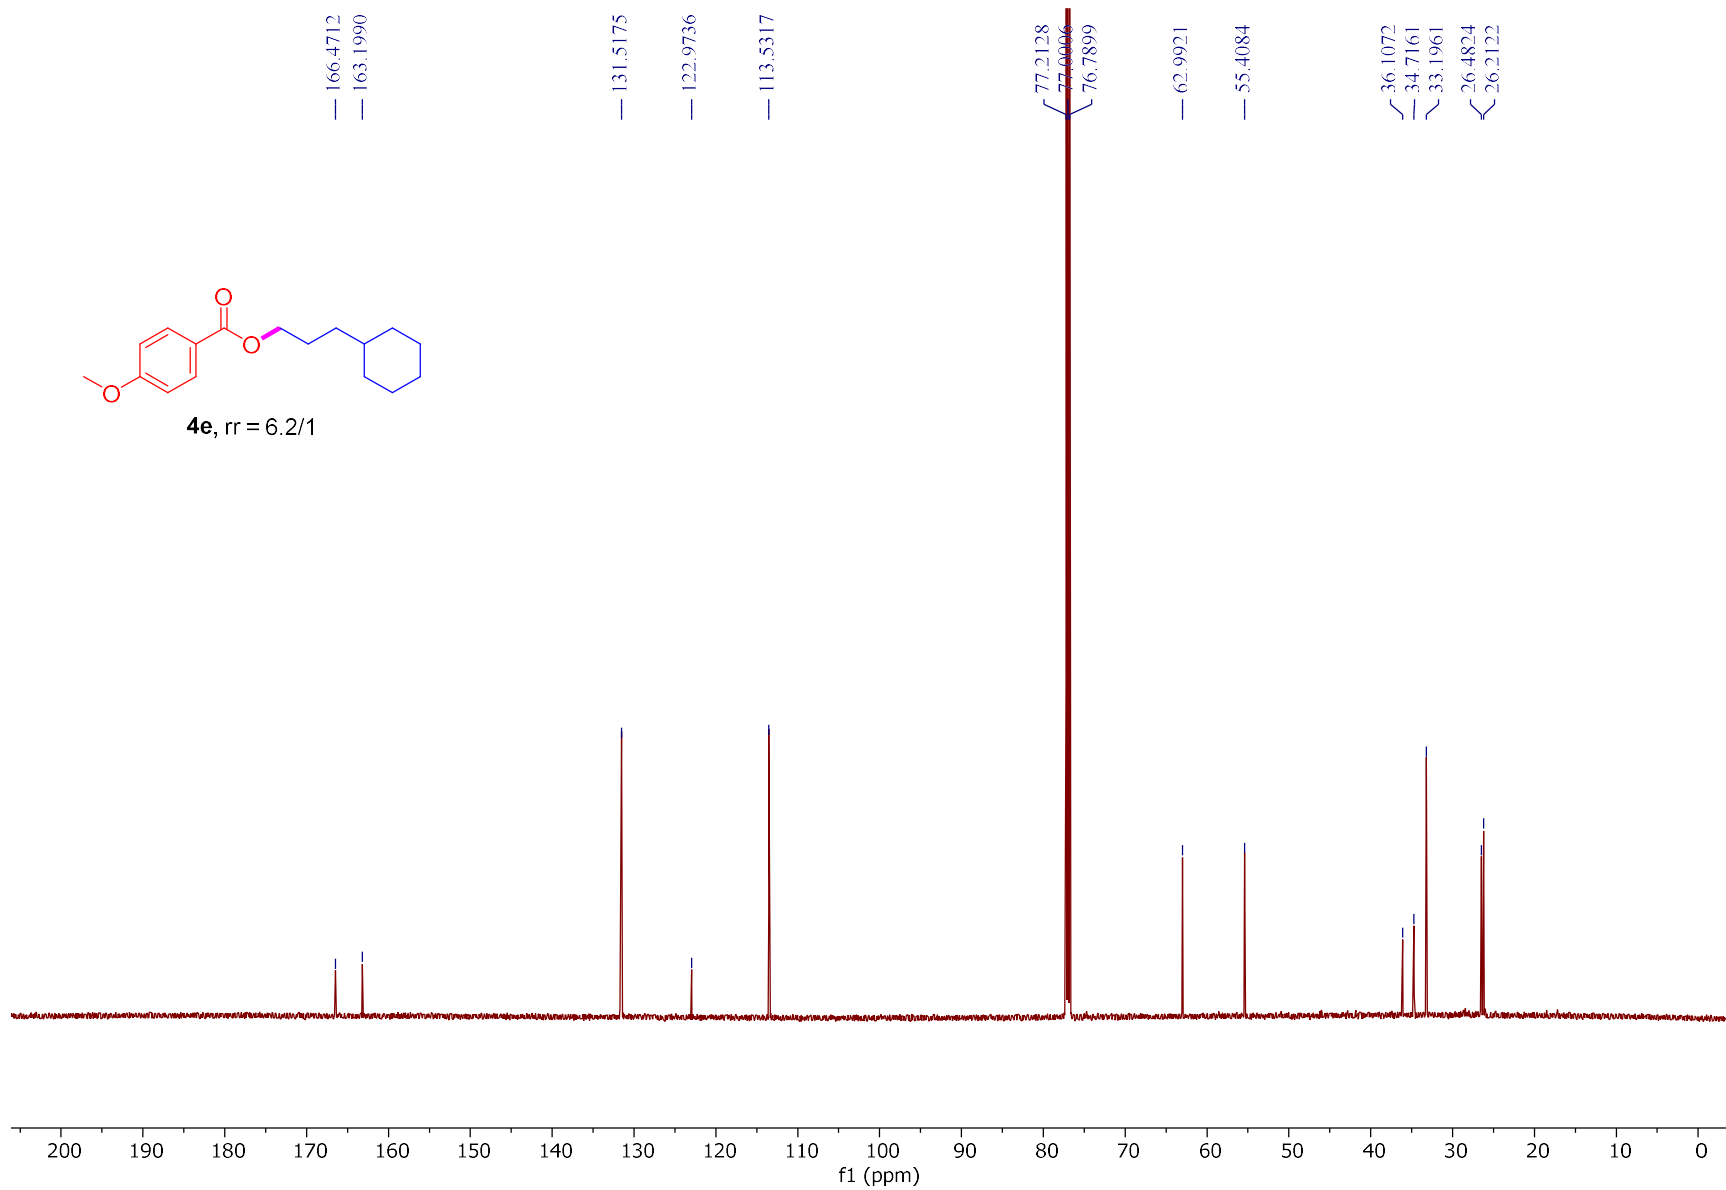

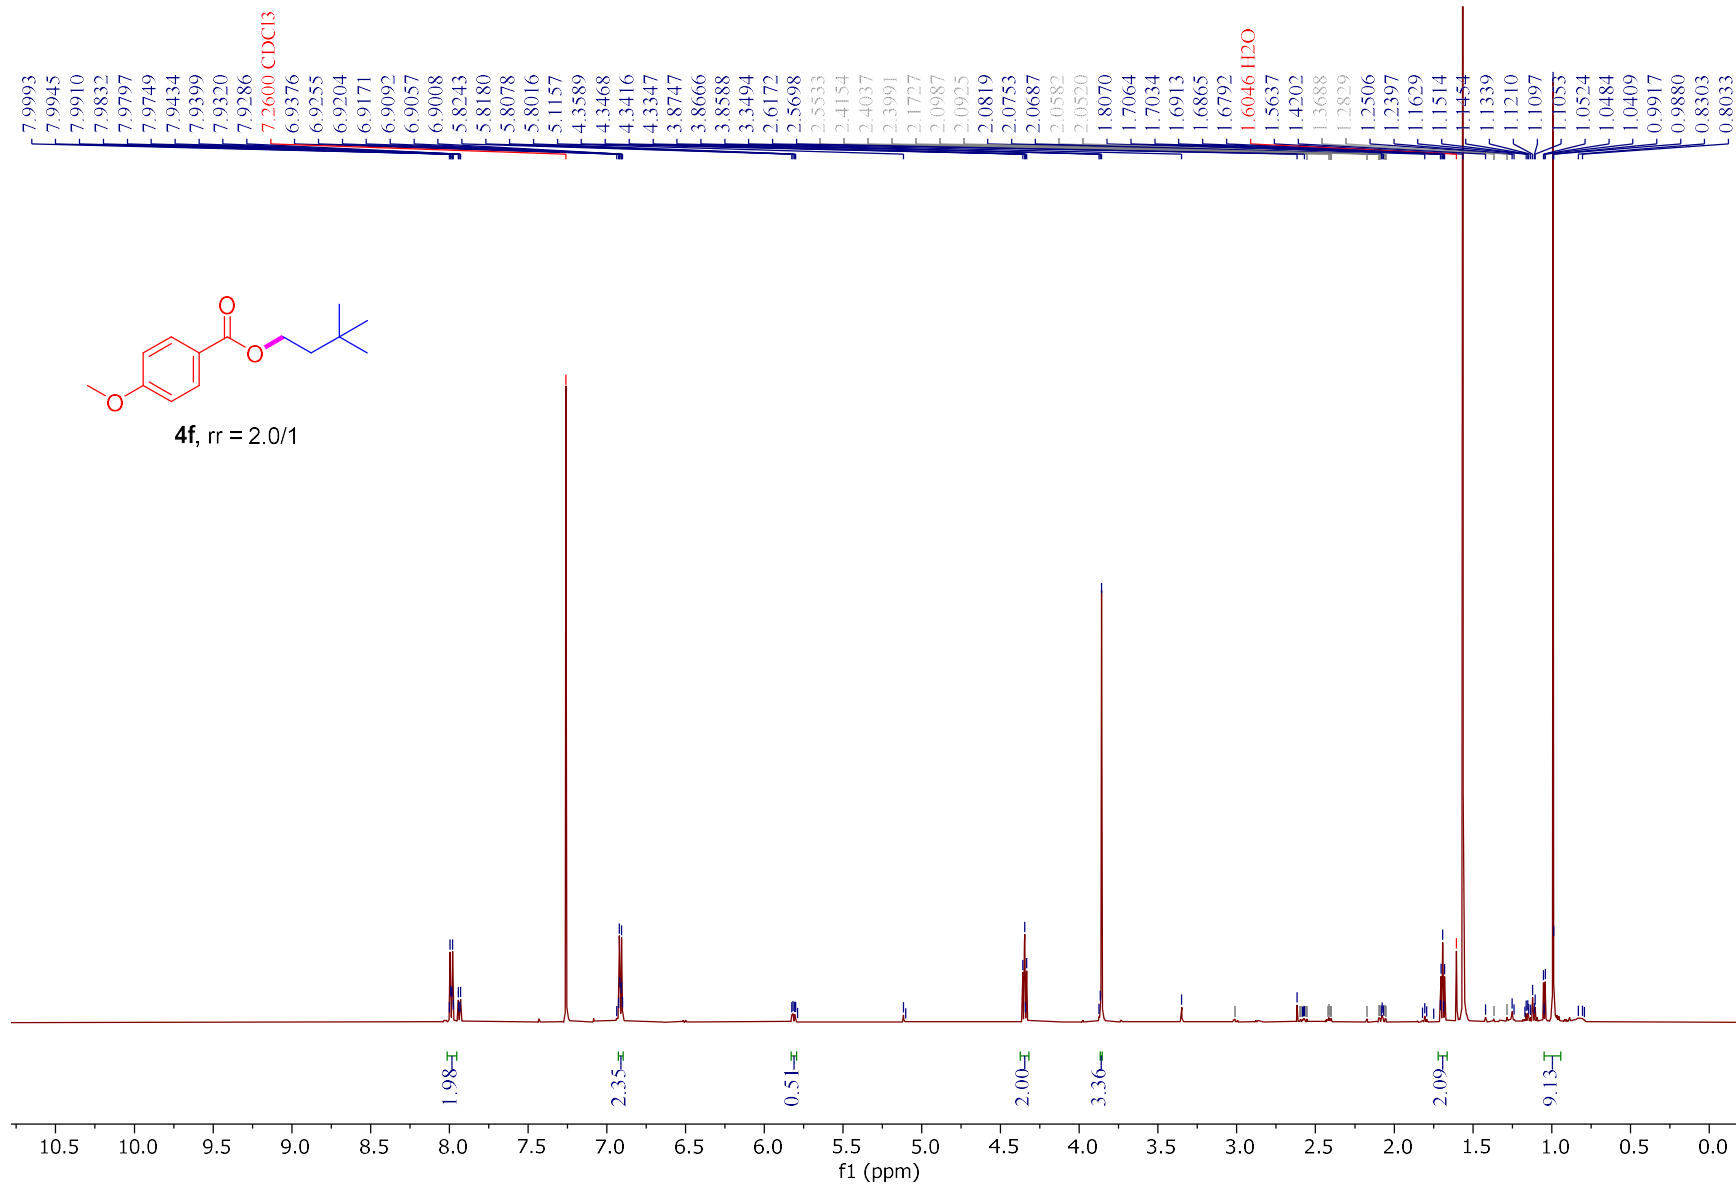

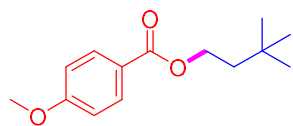

4f, rr = 2.0/1

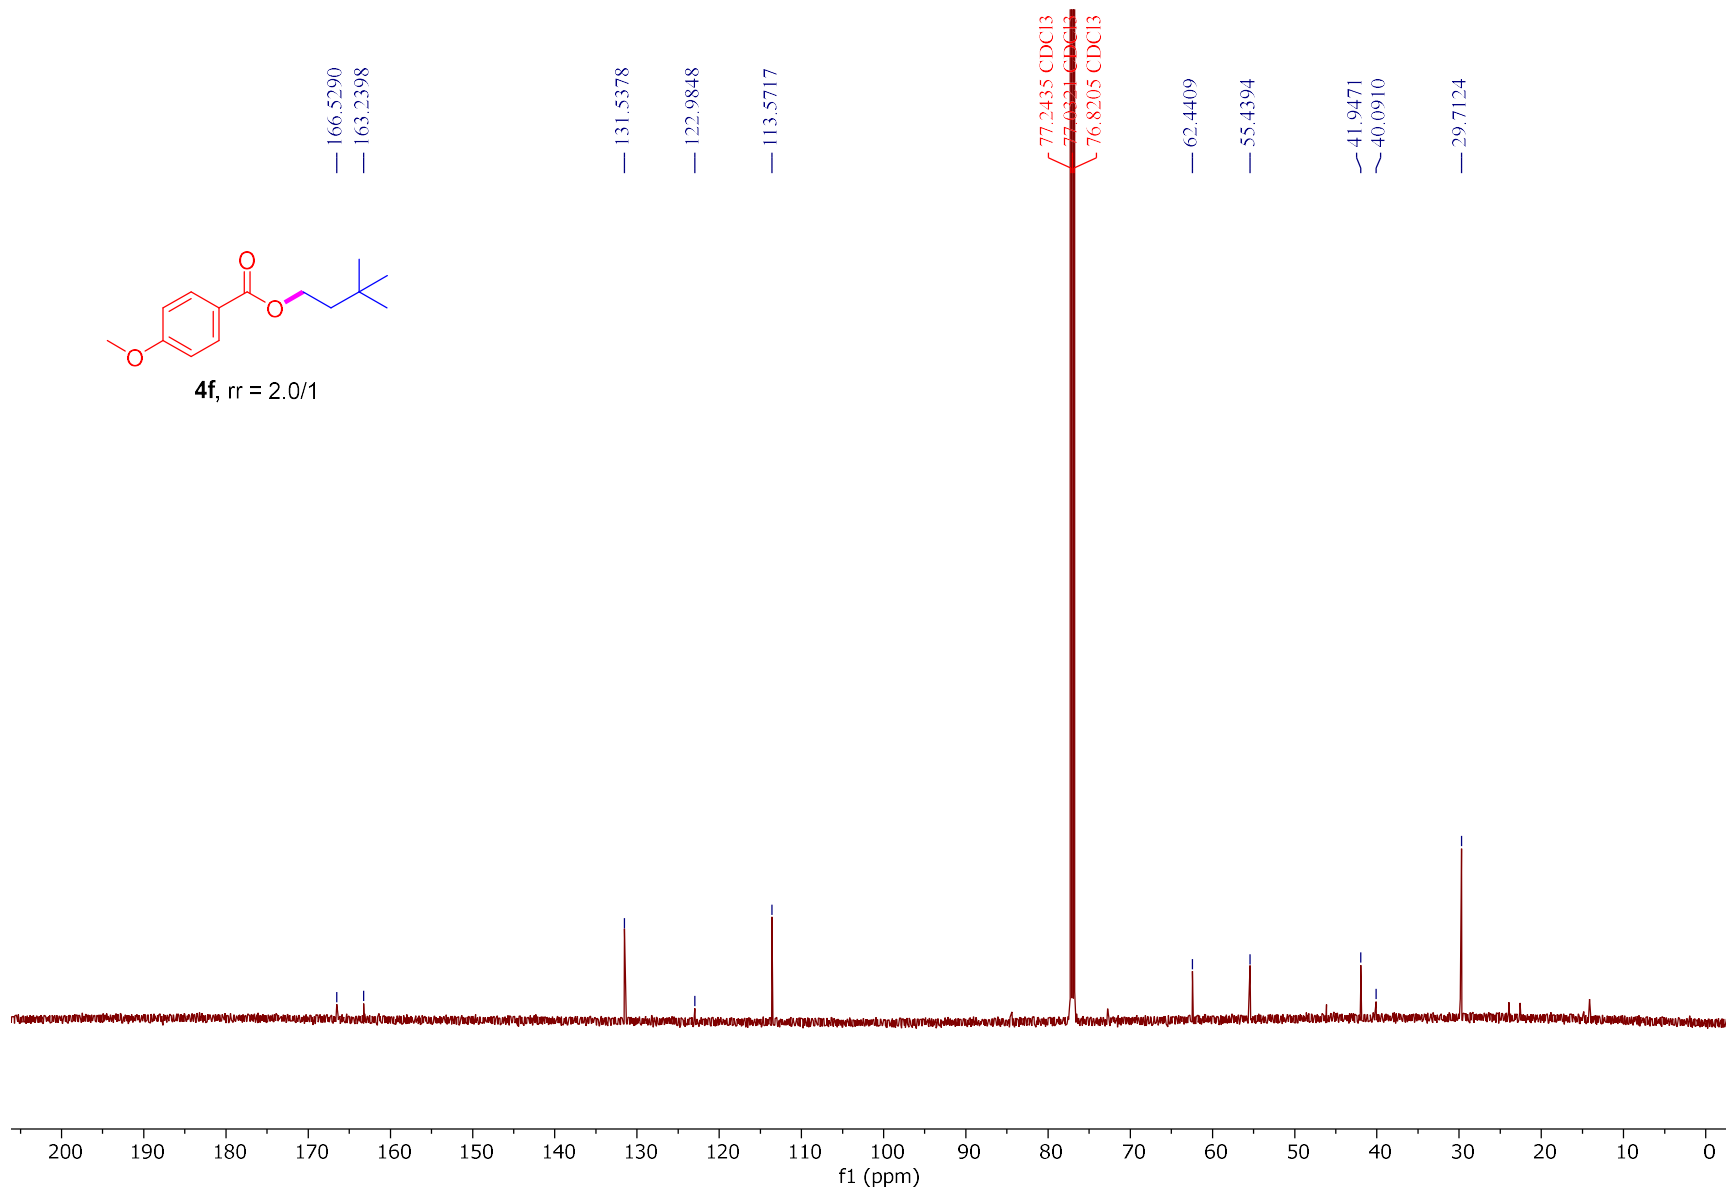

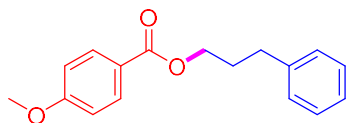

**4g**, rr = 4.7/1

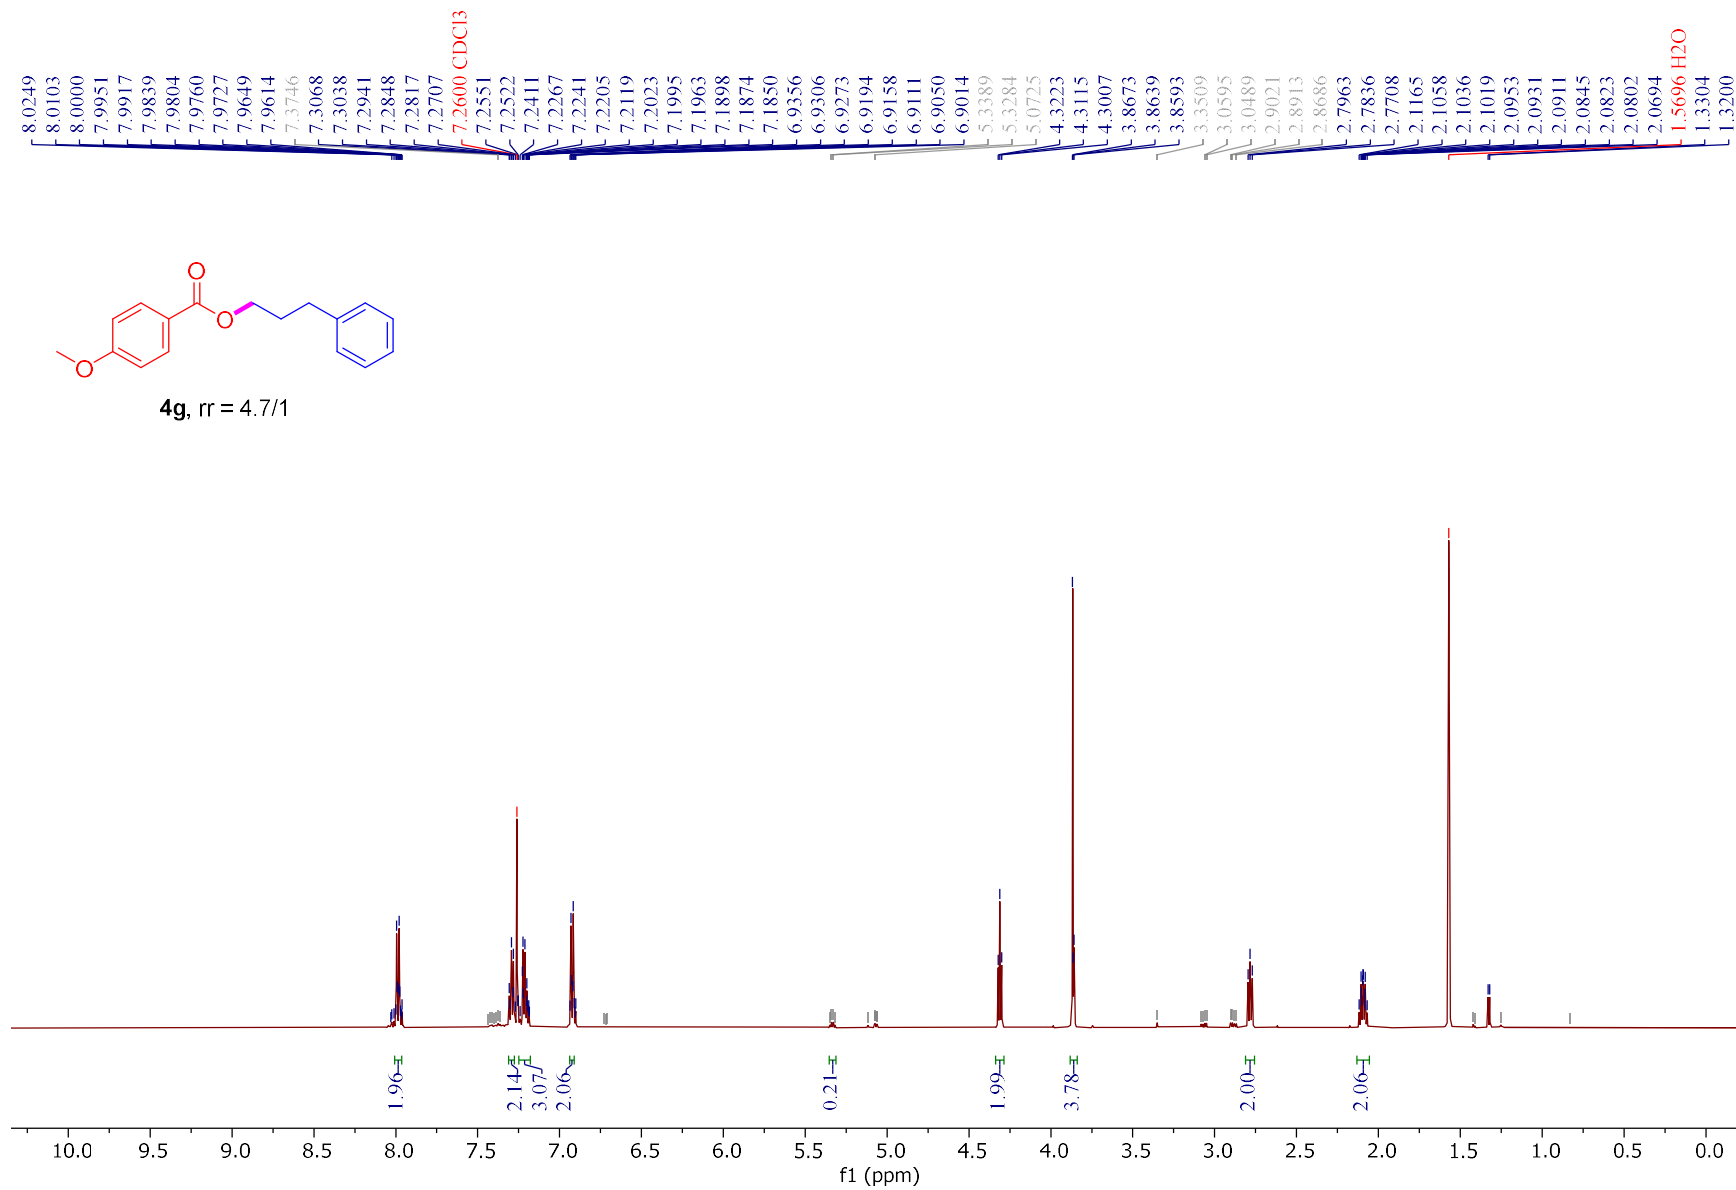

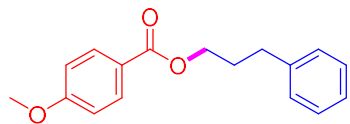

4g, rr = 4.7/1

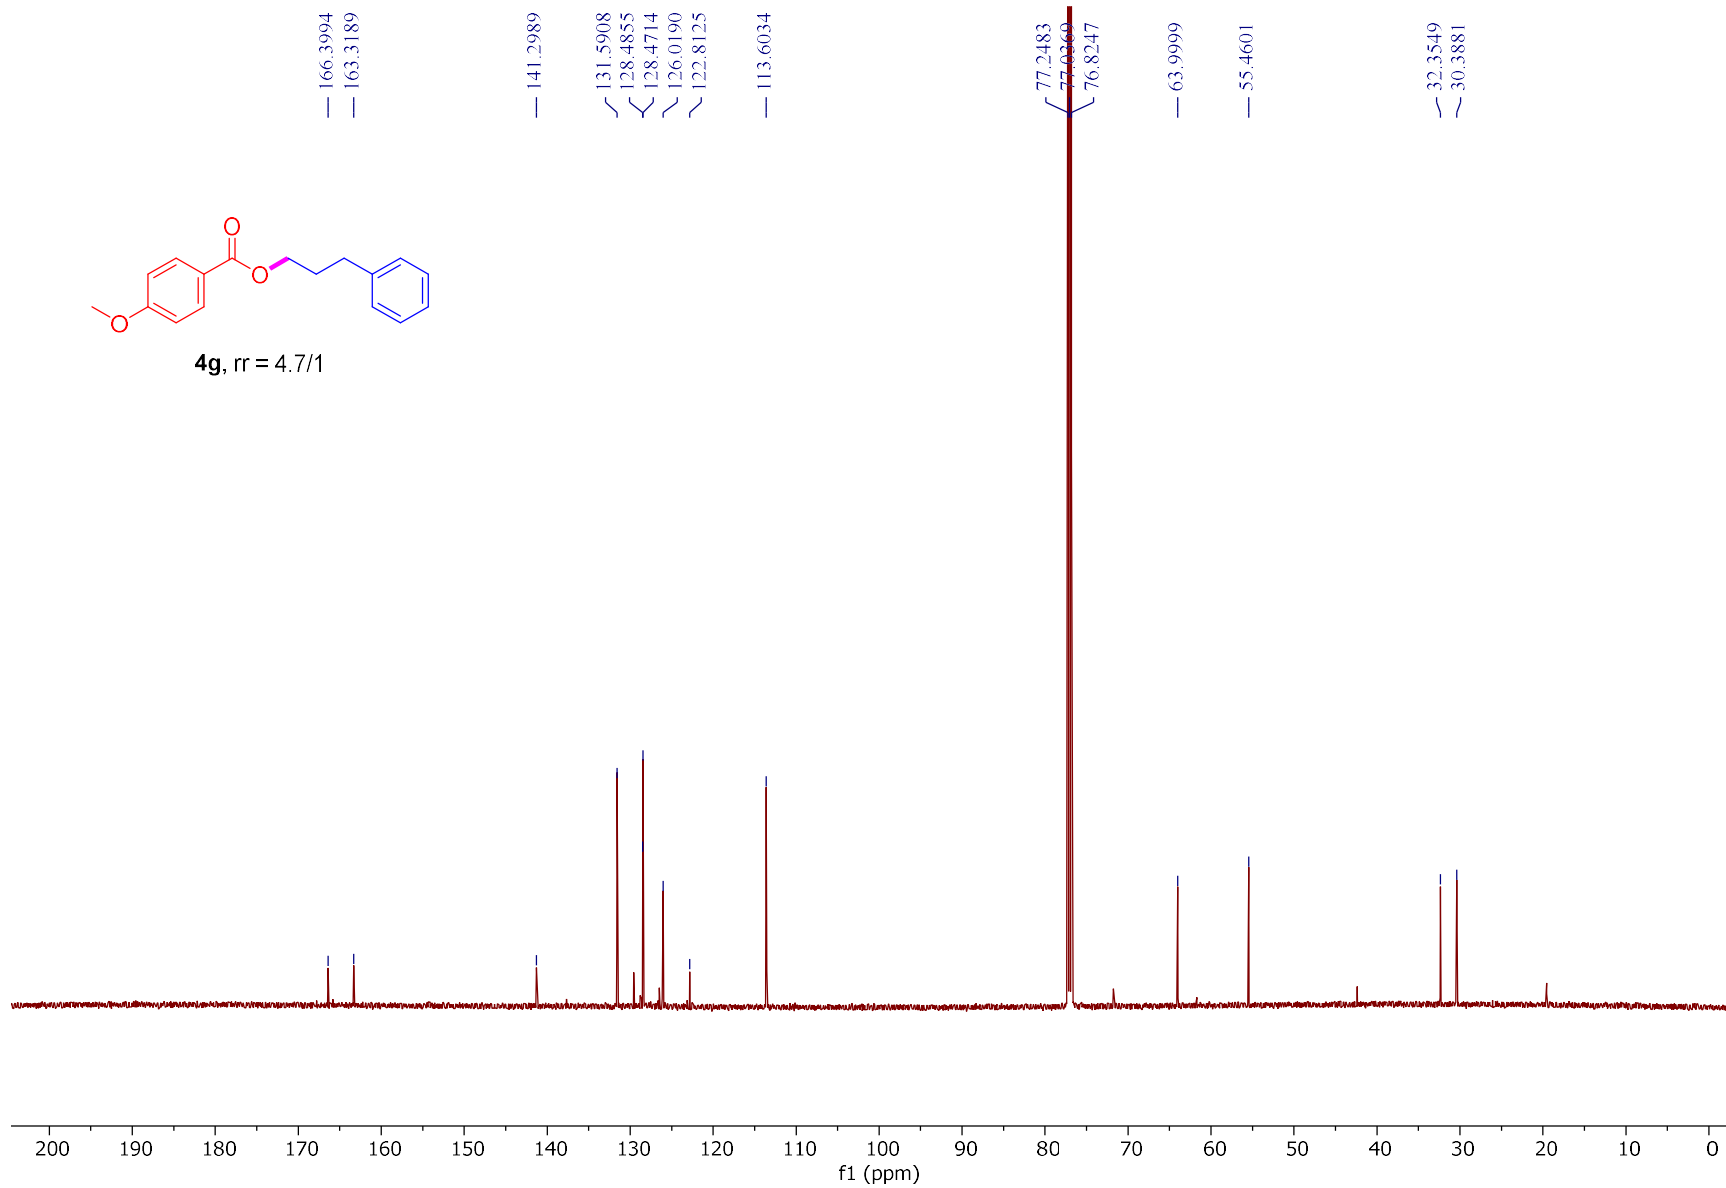

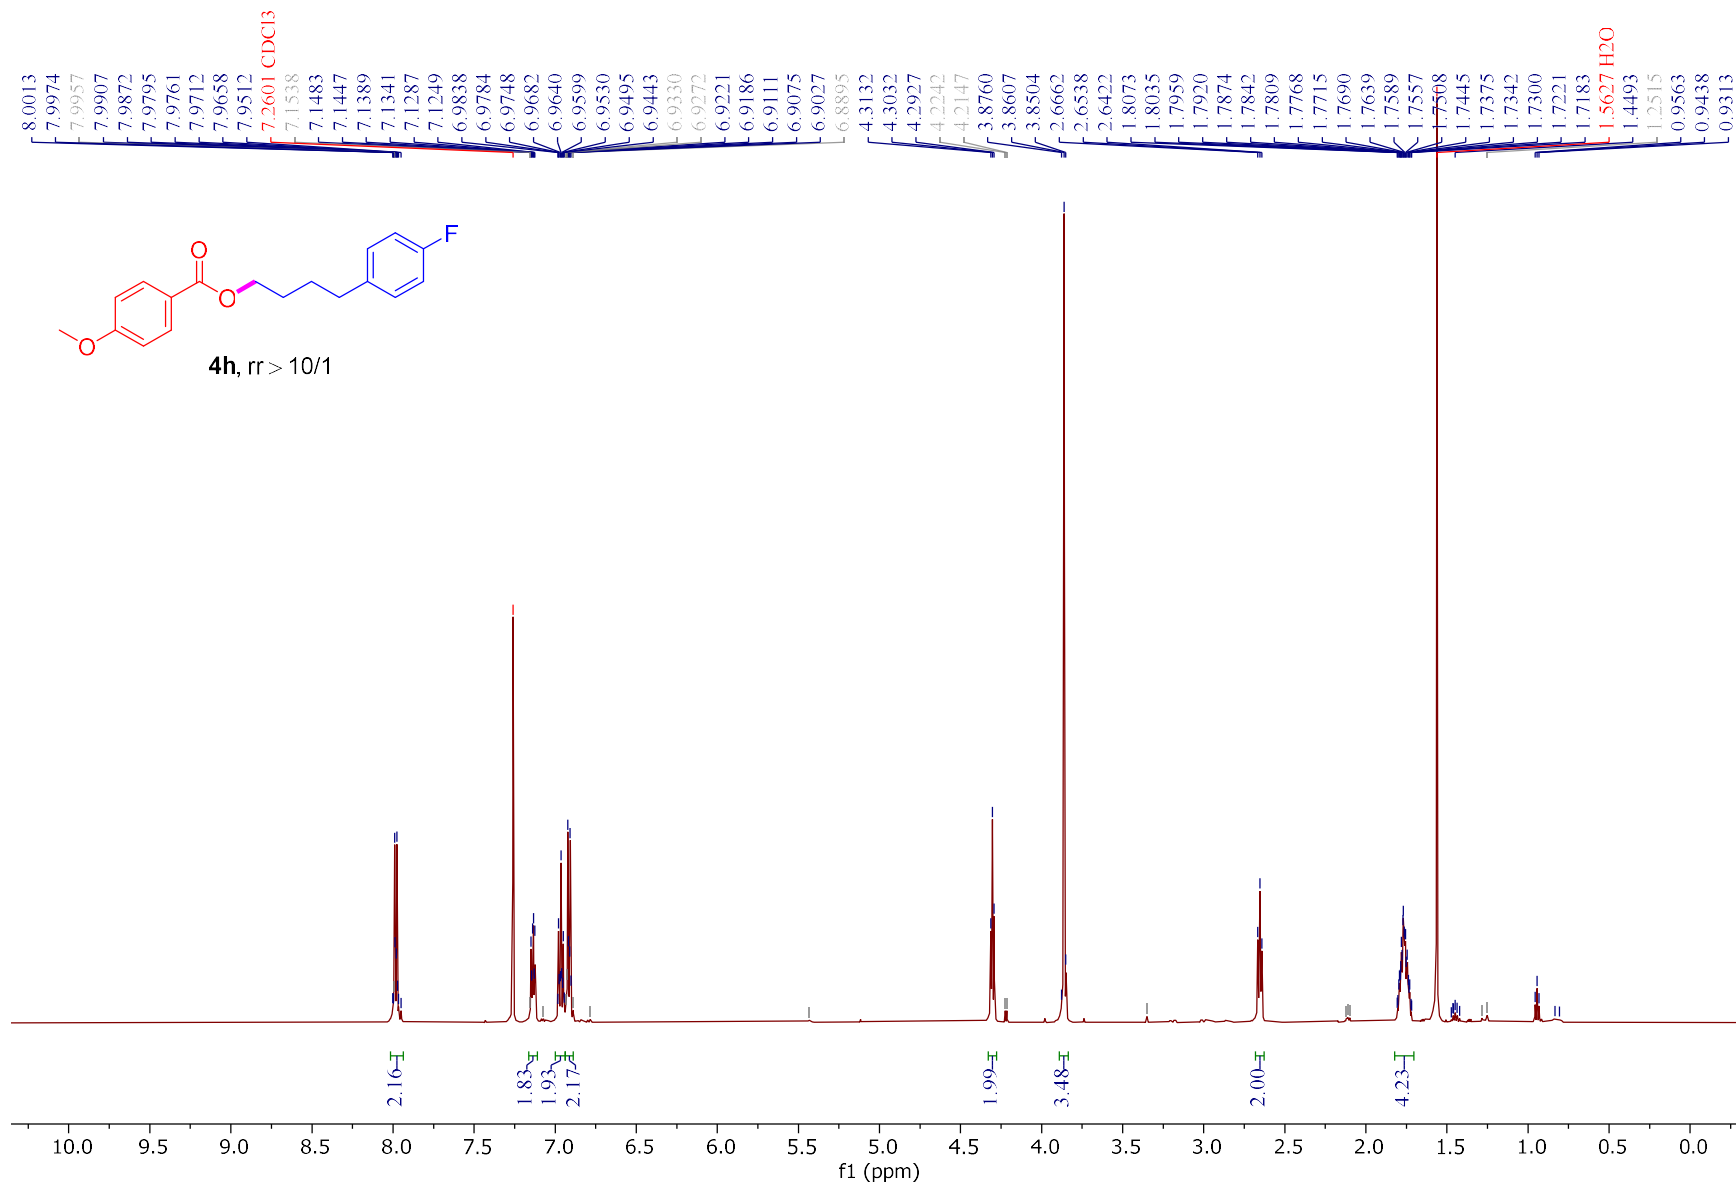

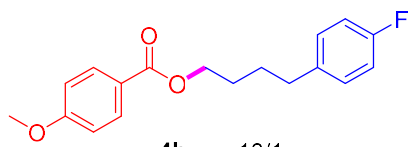

4h, rr > 10/1

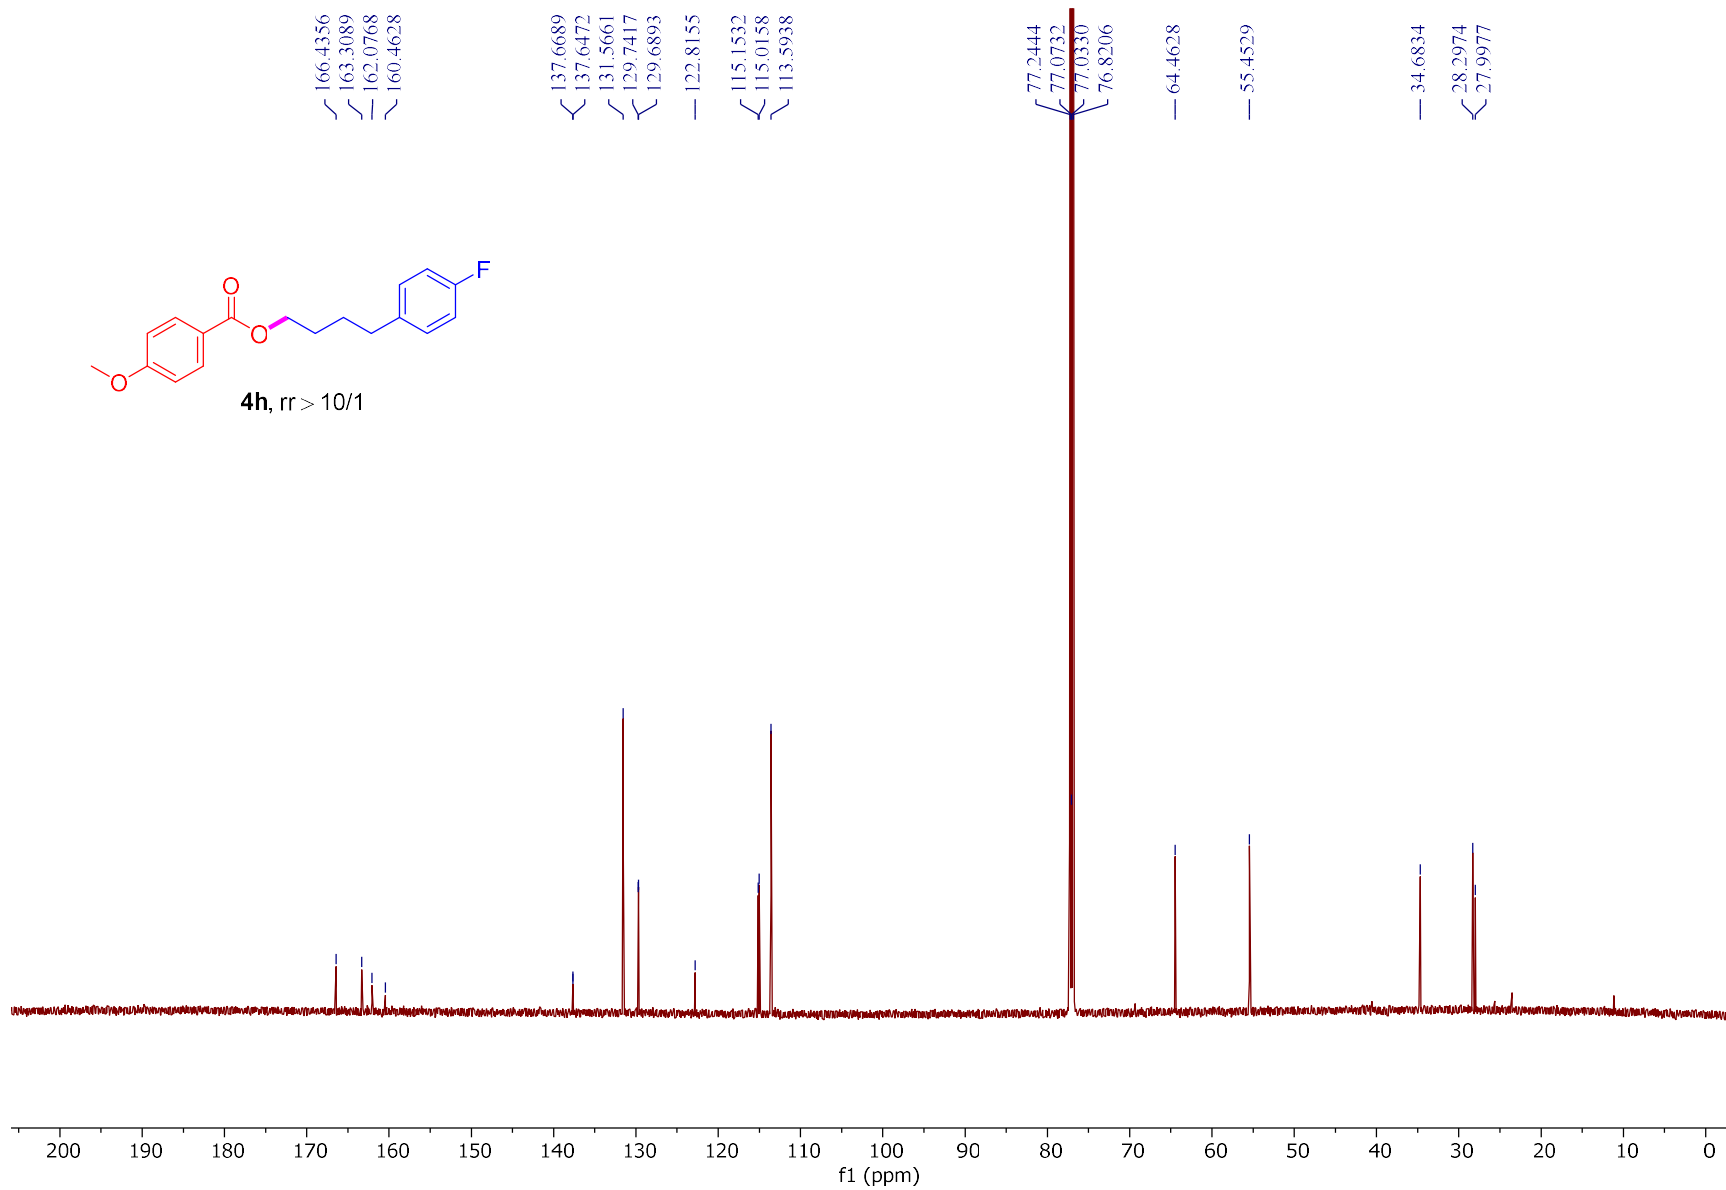

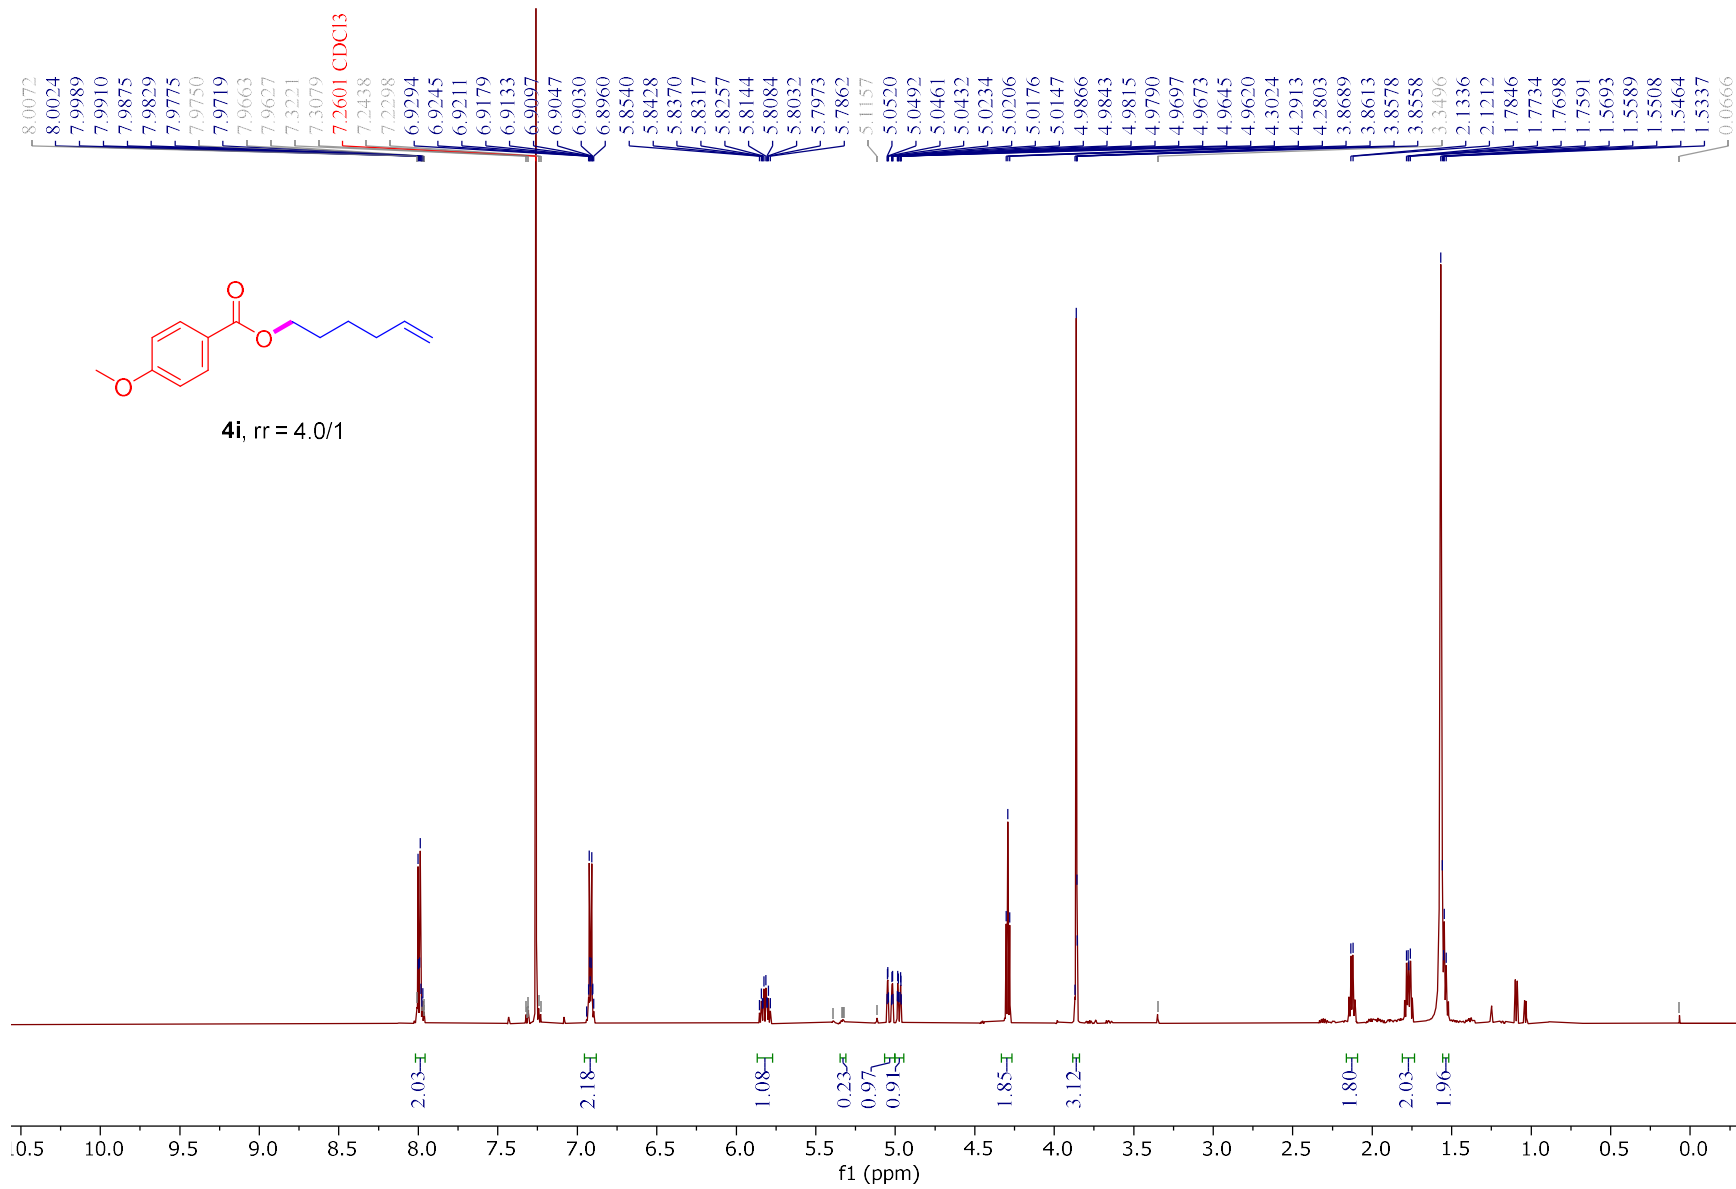



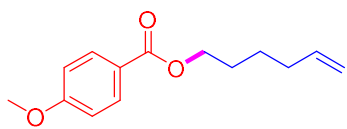

**4i**, rr = 4.0/1

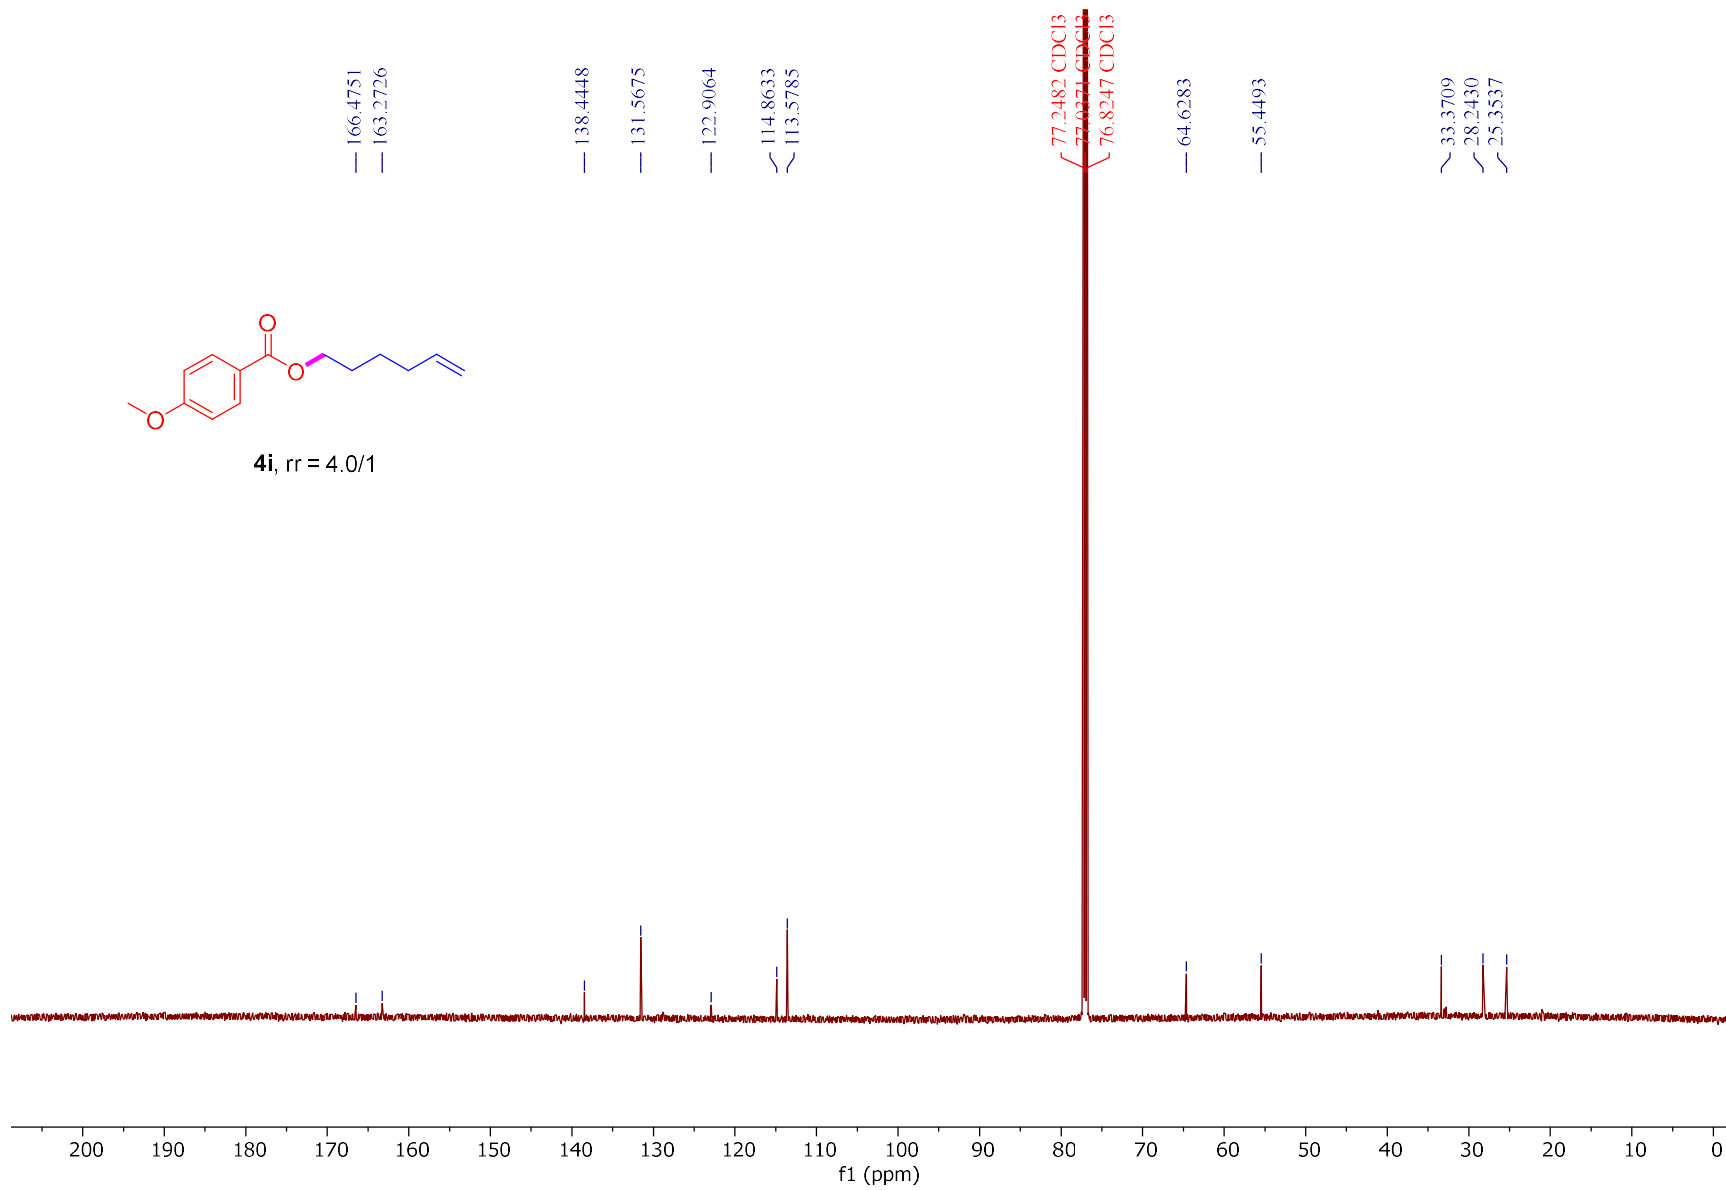

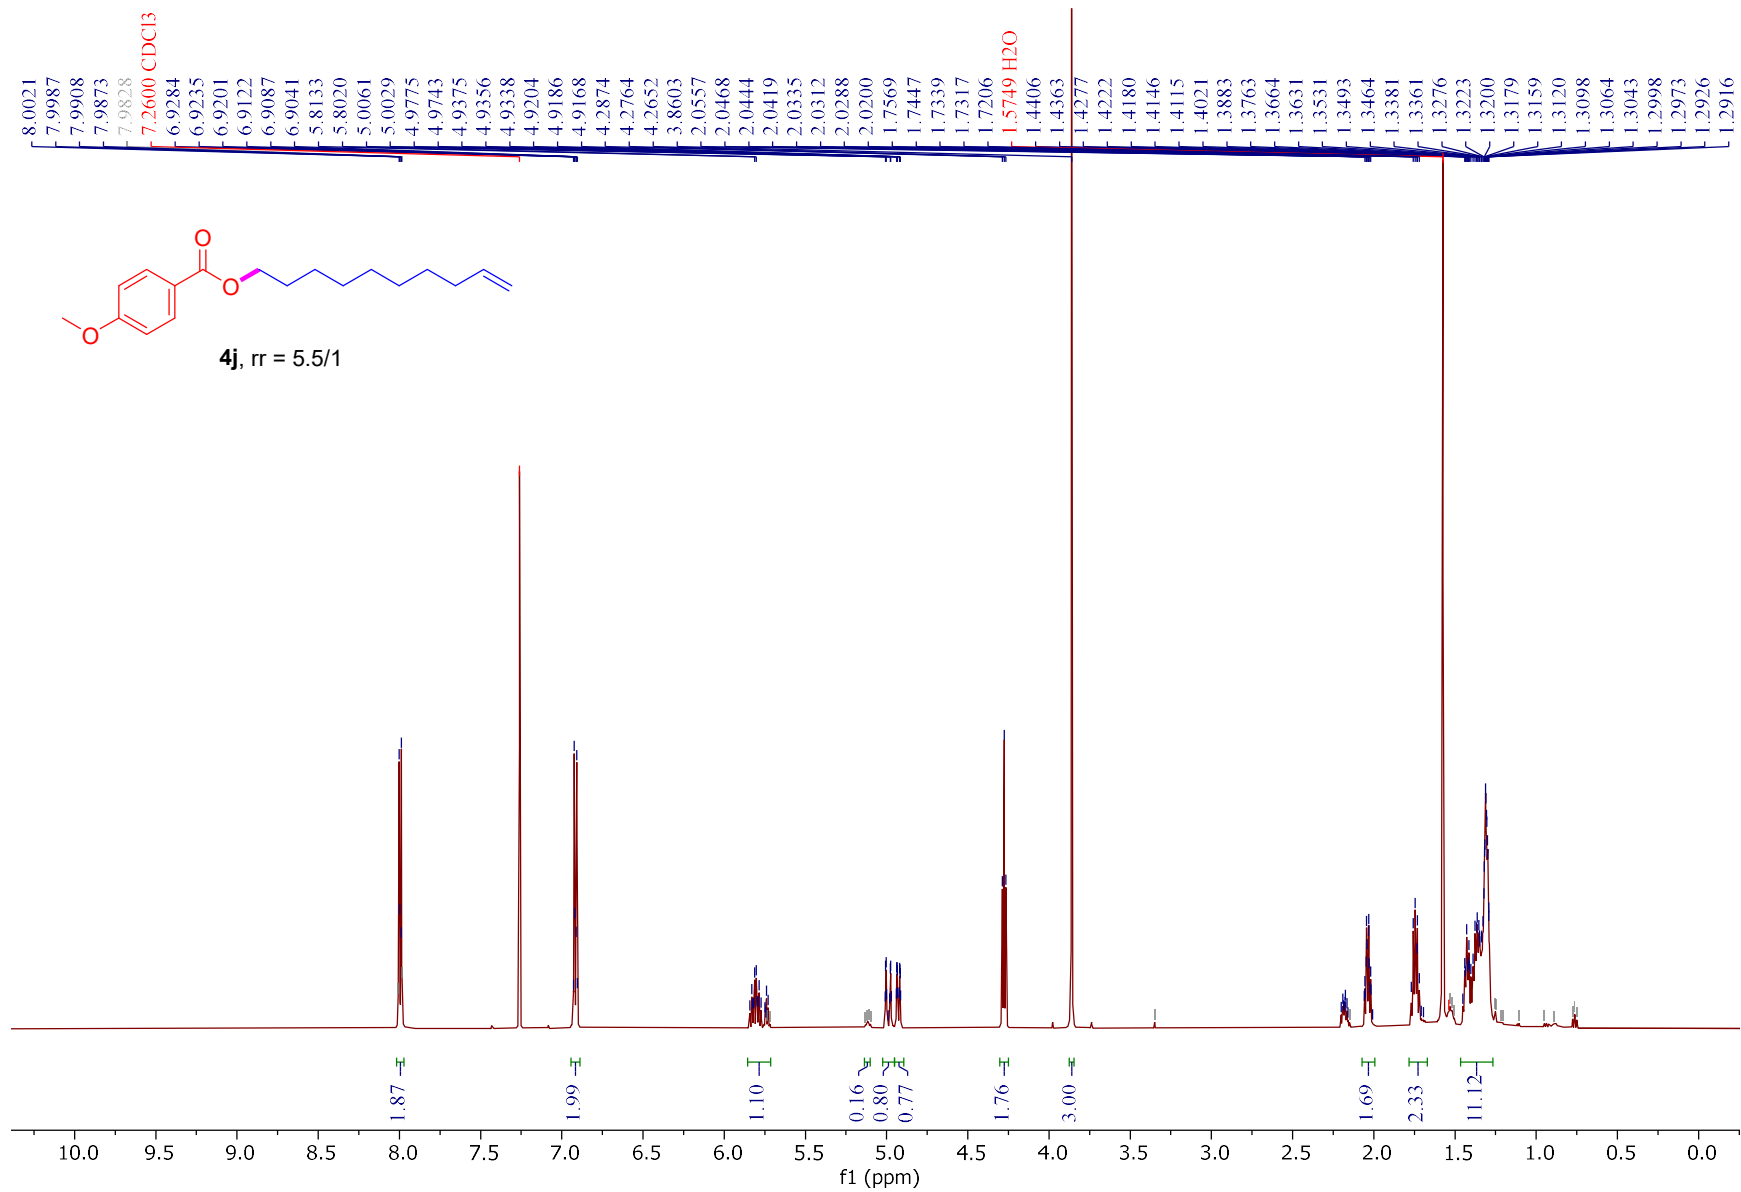

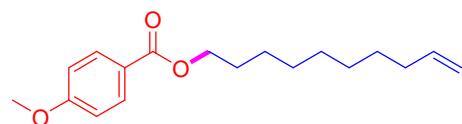

4j, rr = 5.5/1

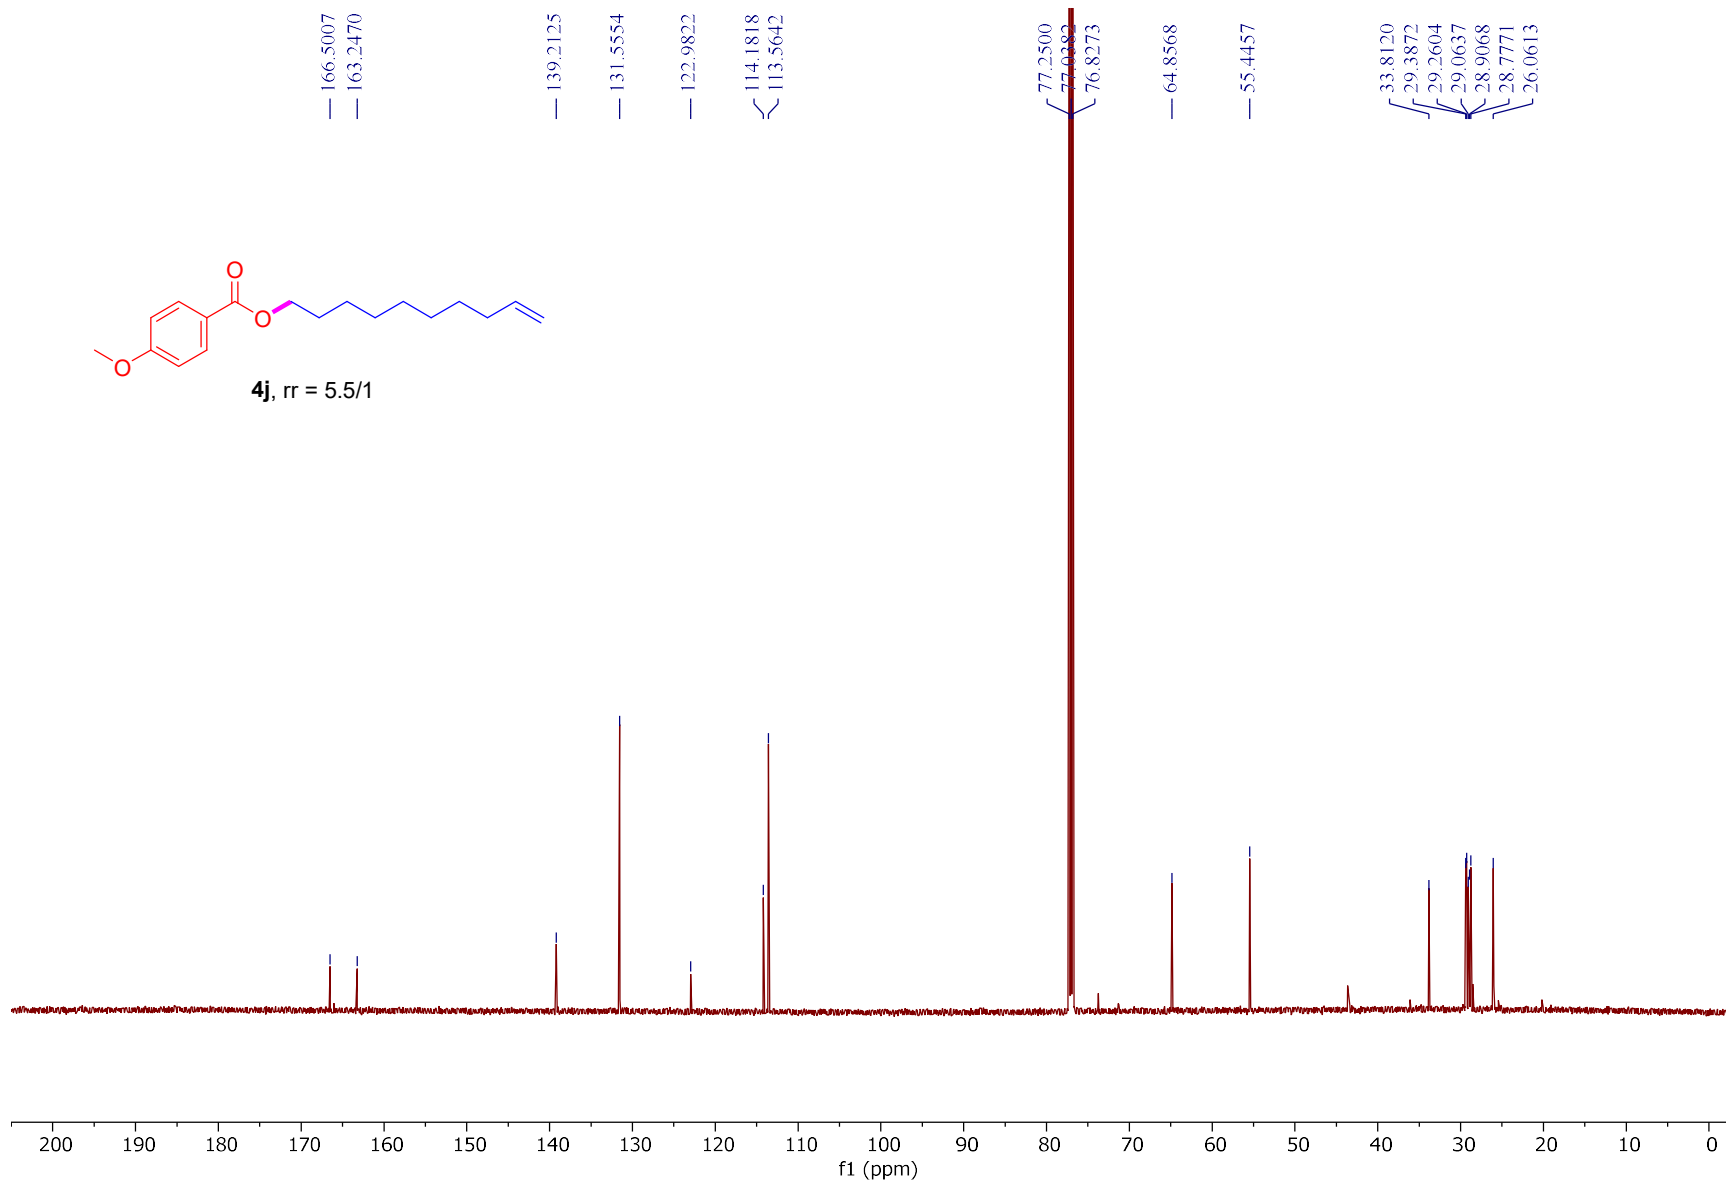

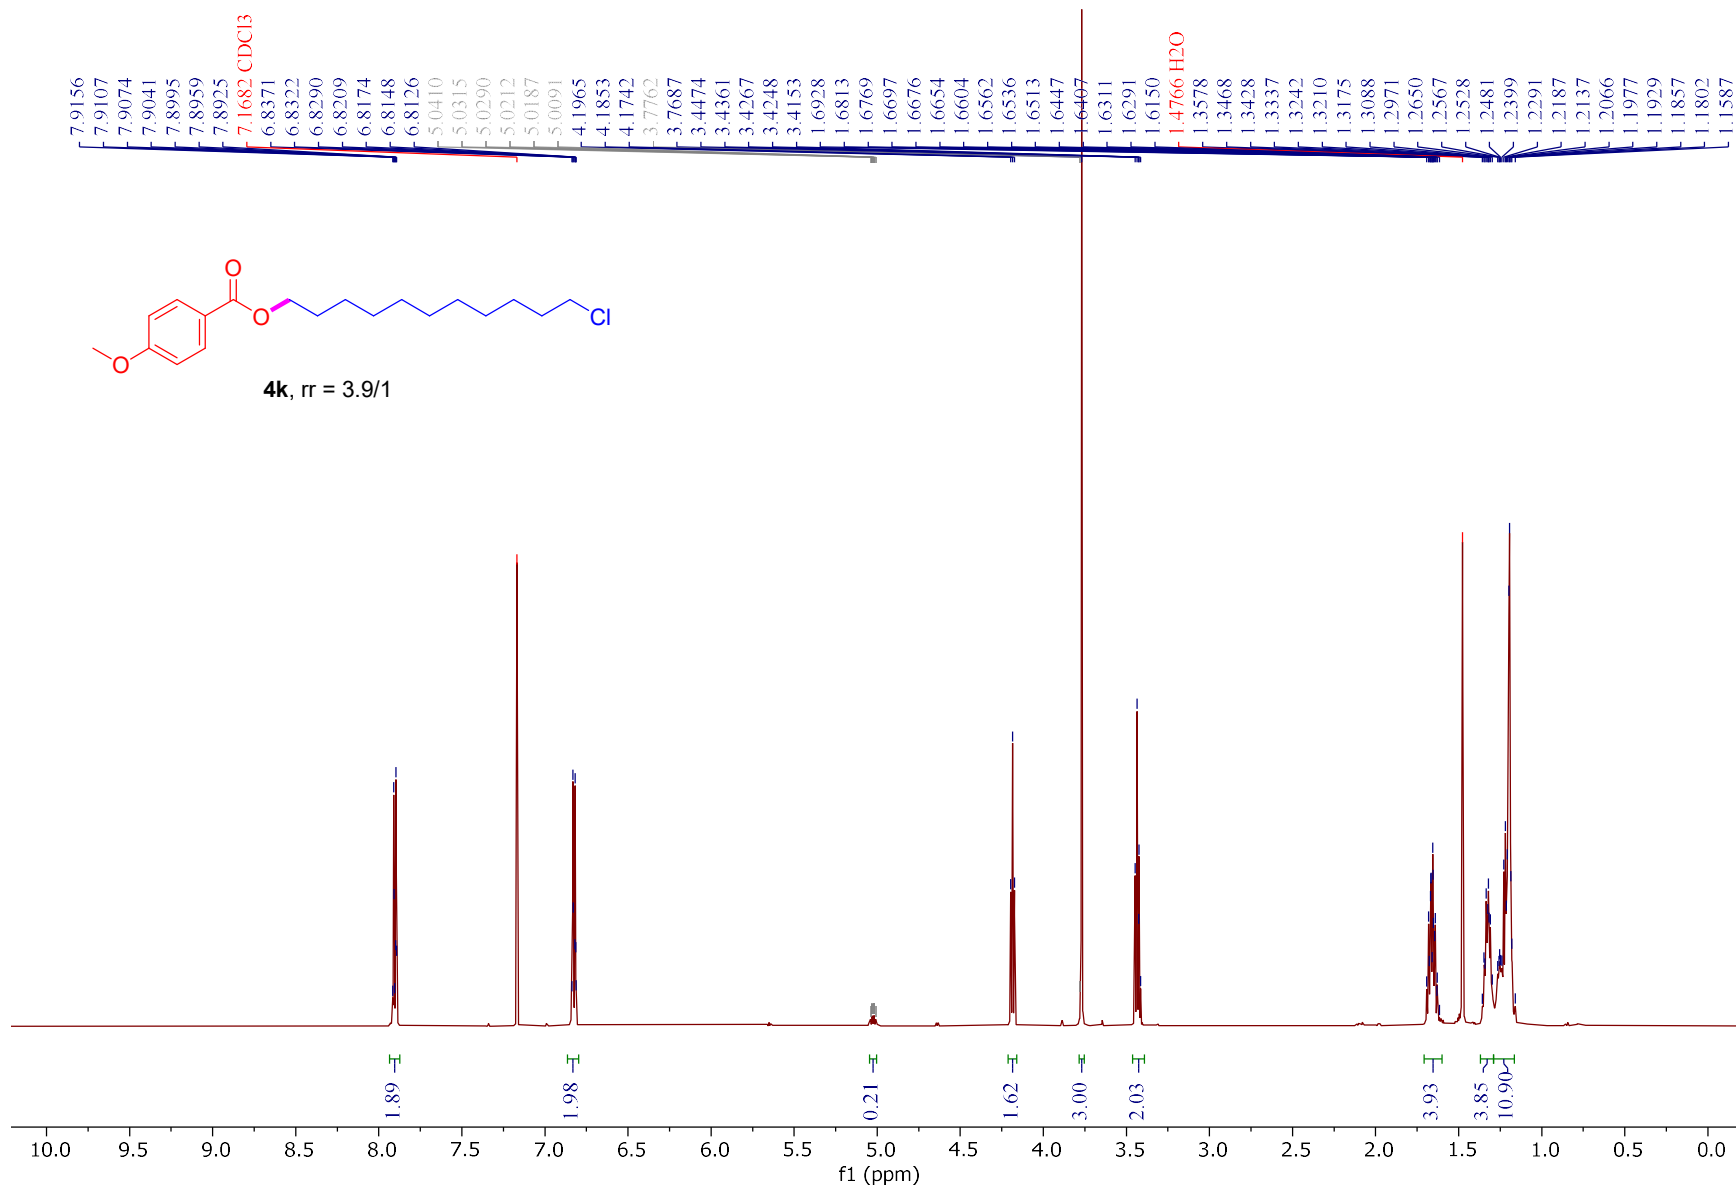

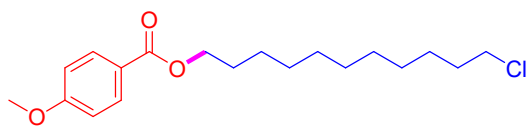

4k, rr = 3.9/1

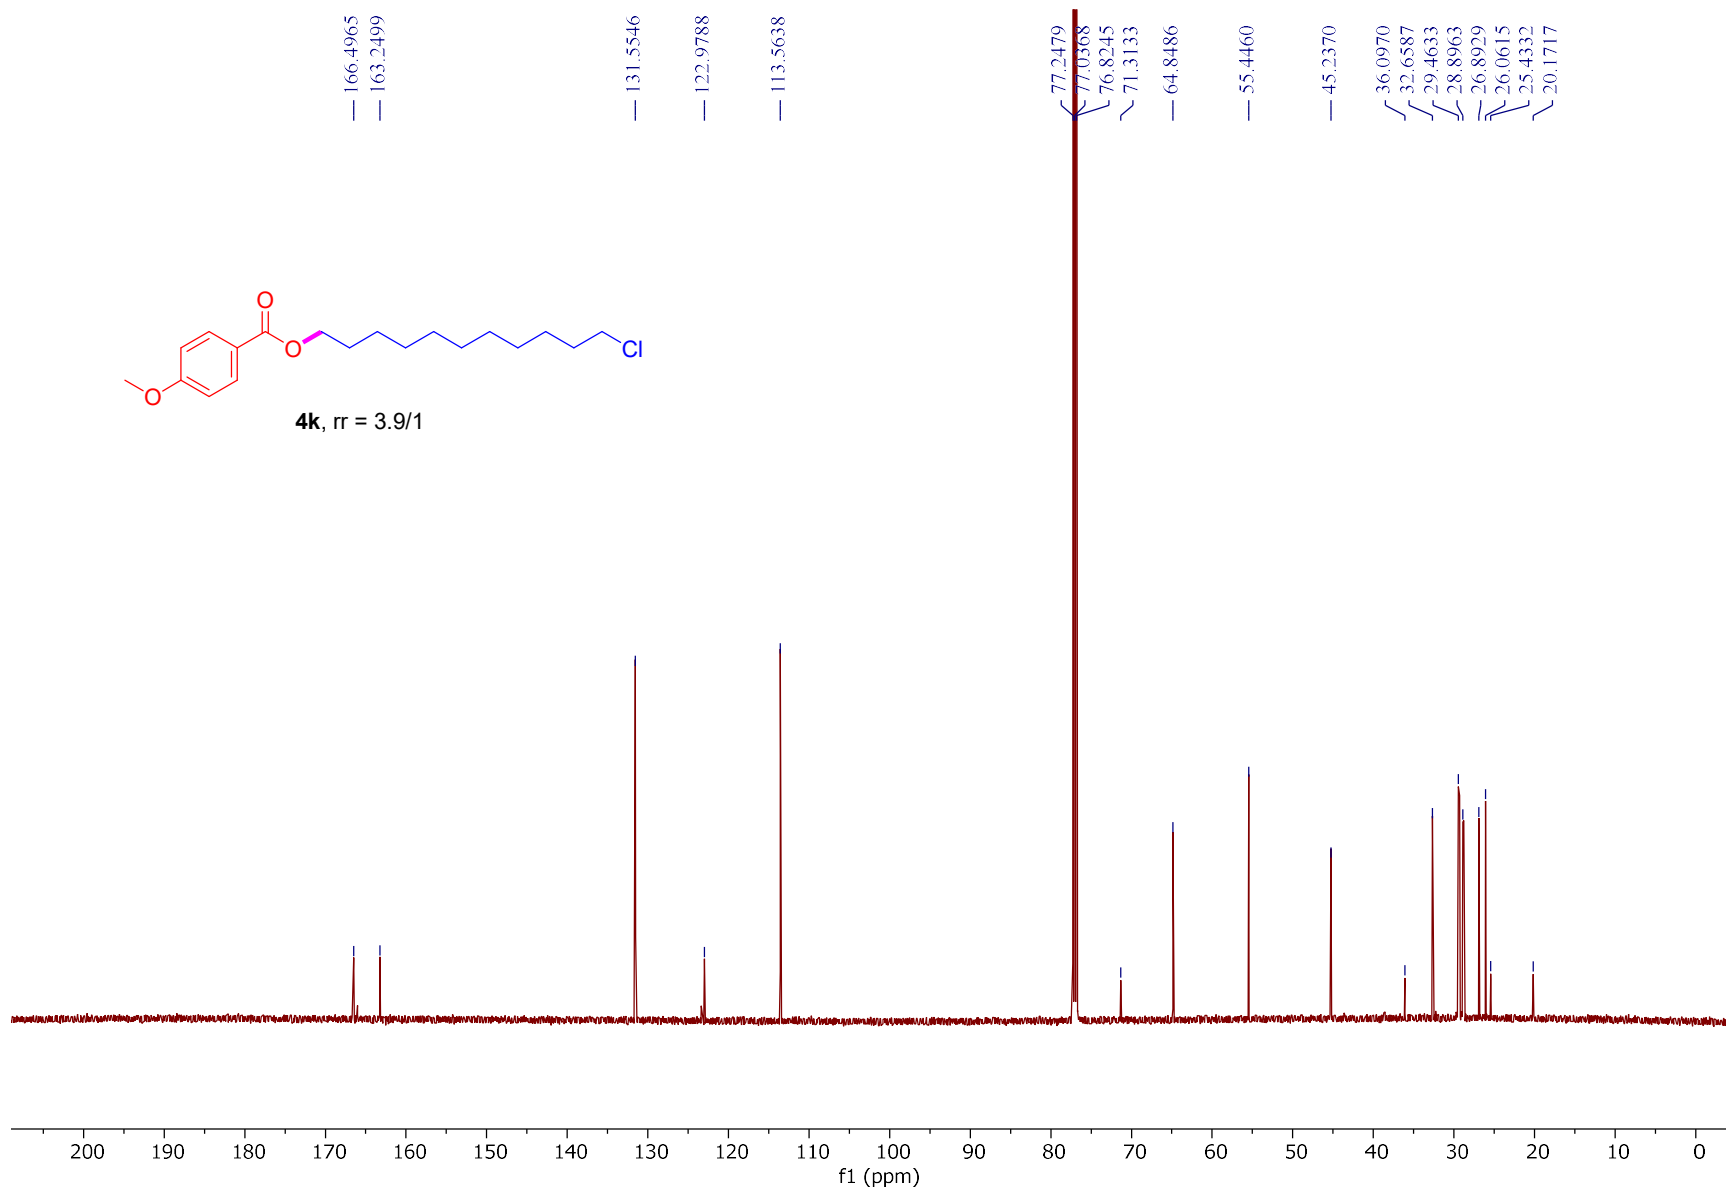

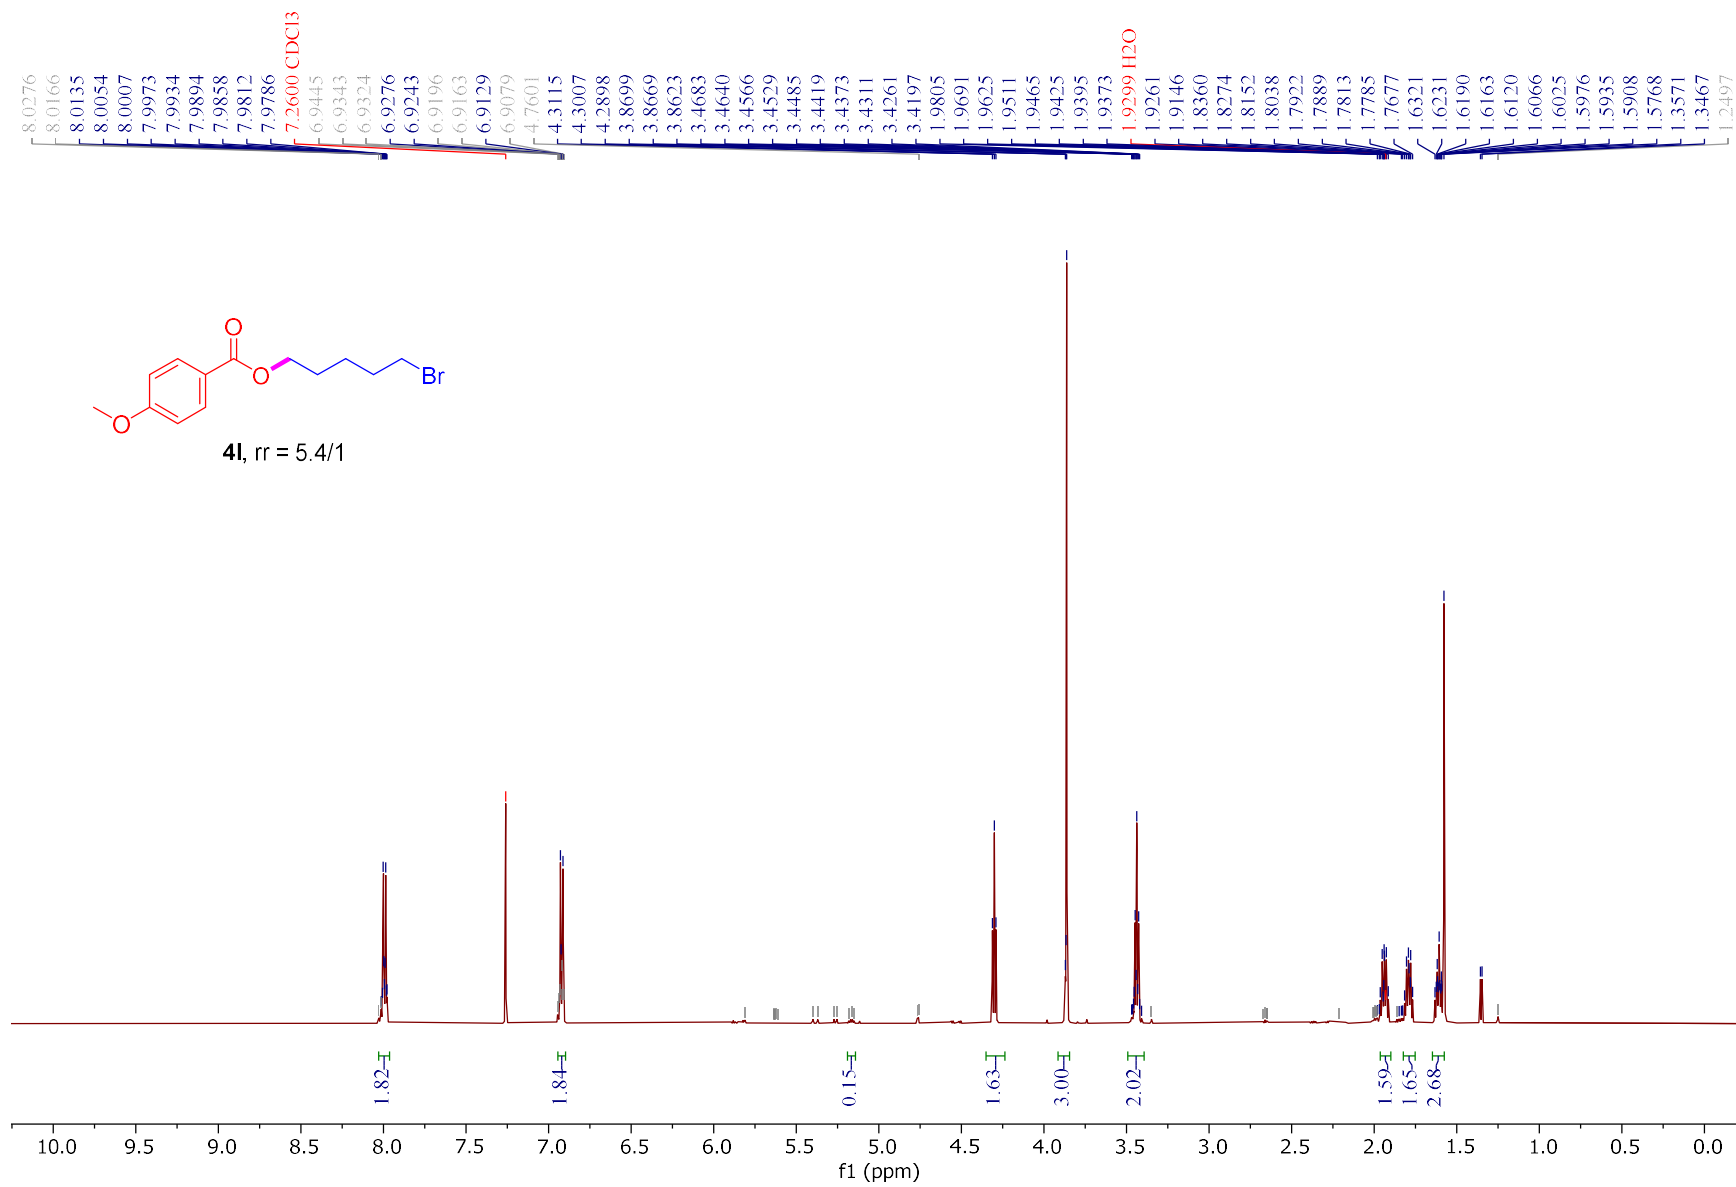

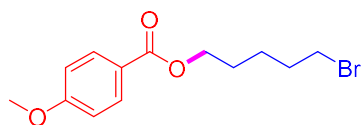

**4l**, rr = 5.4/1

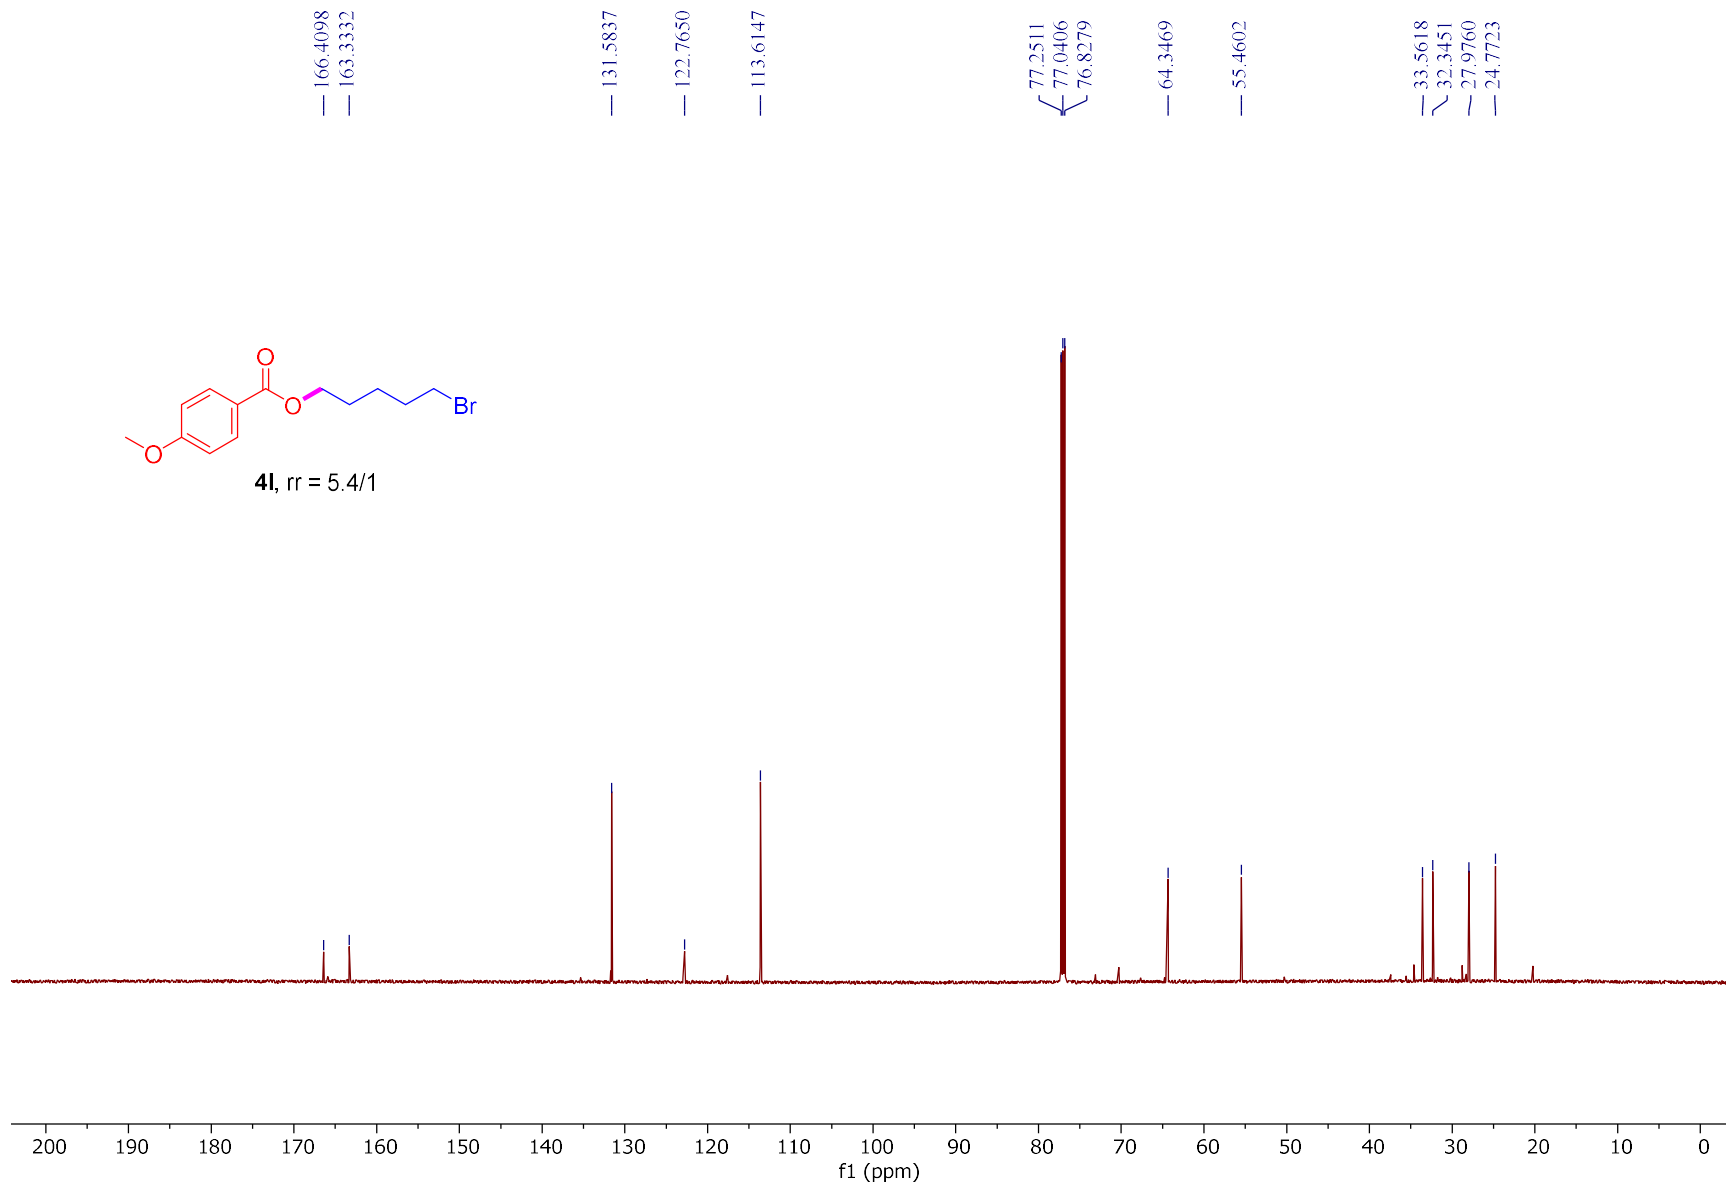

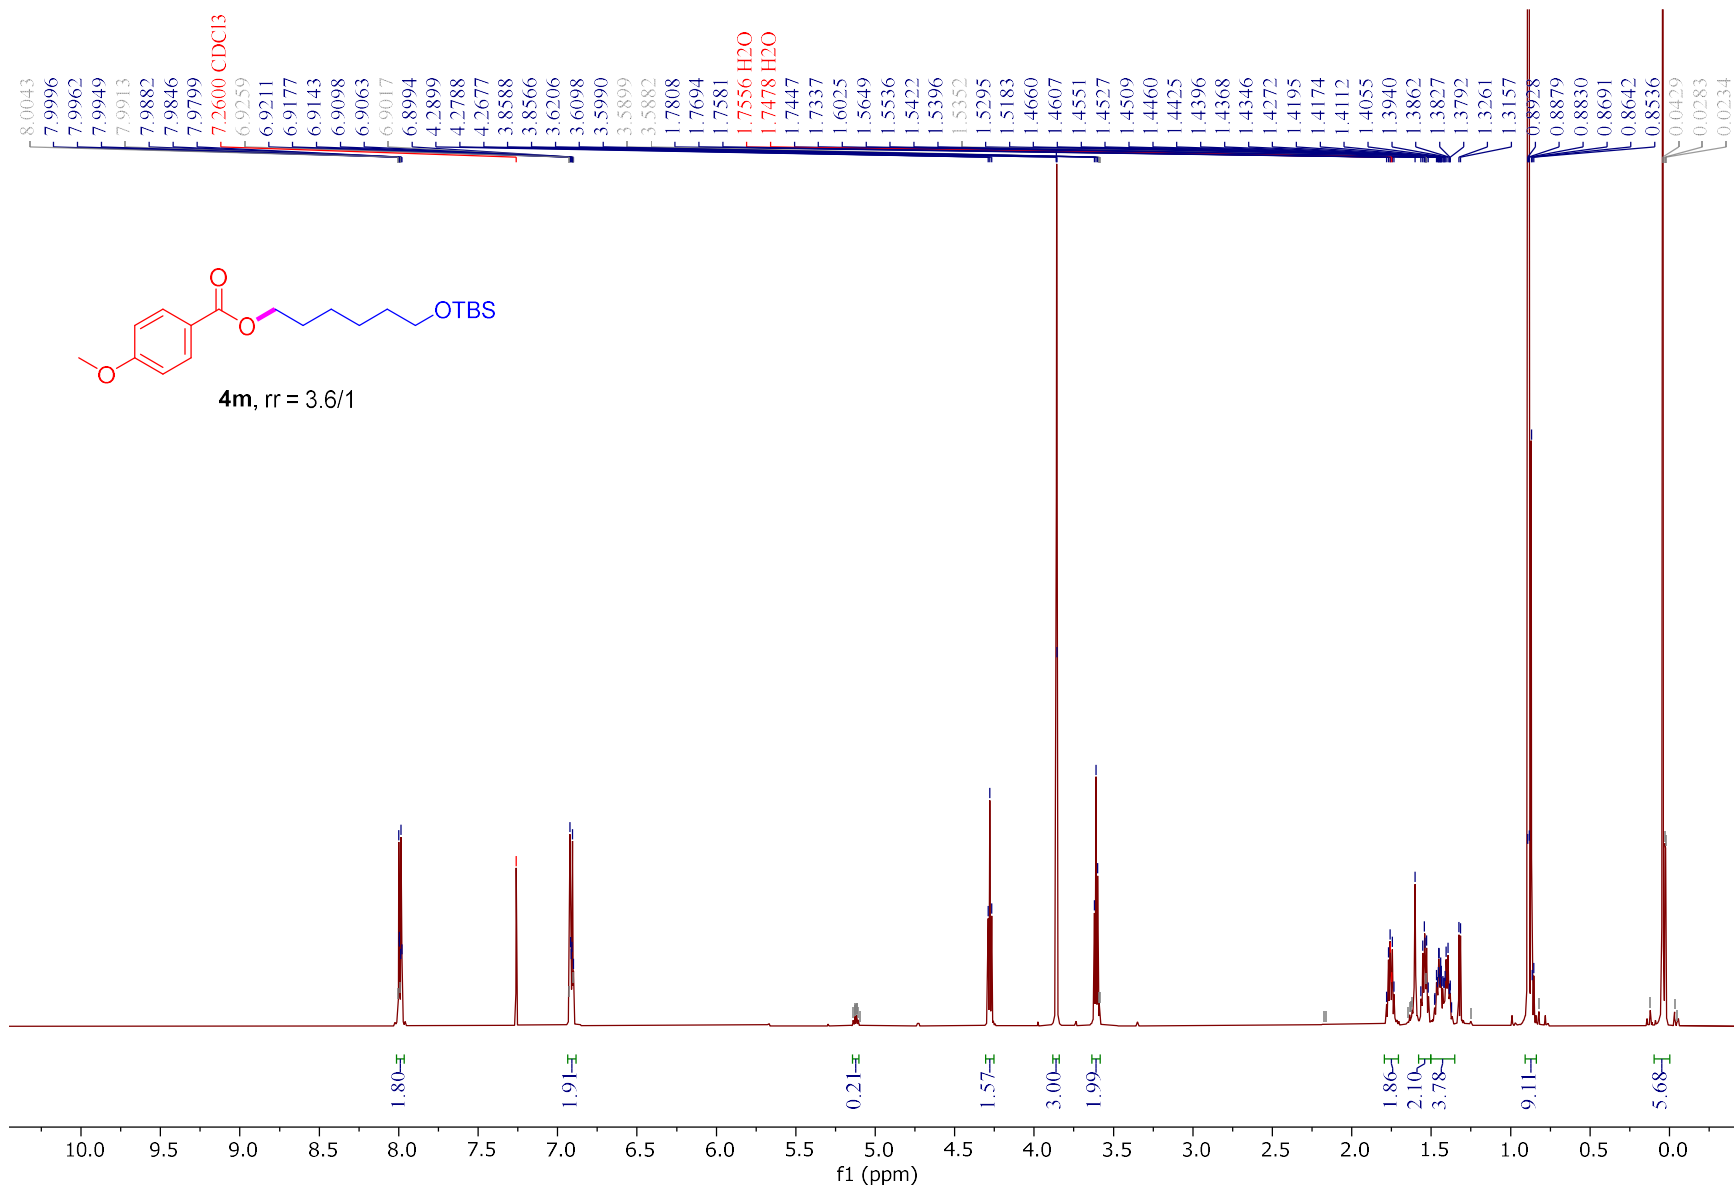



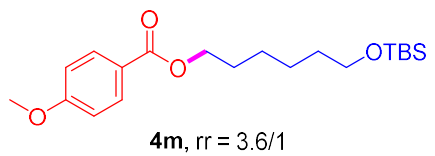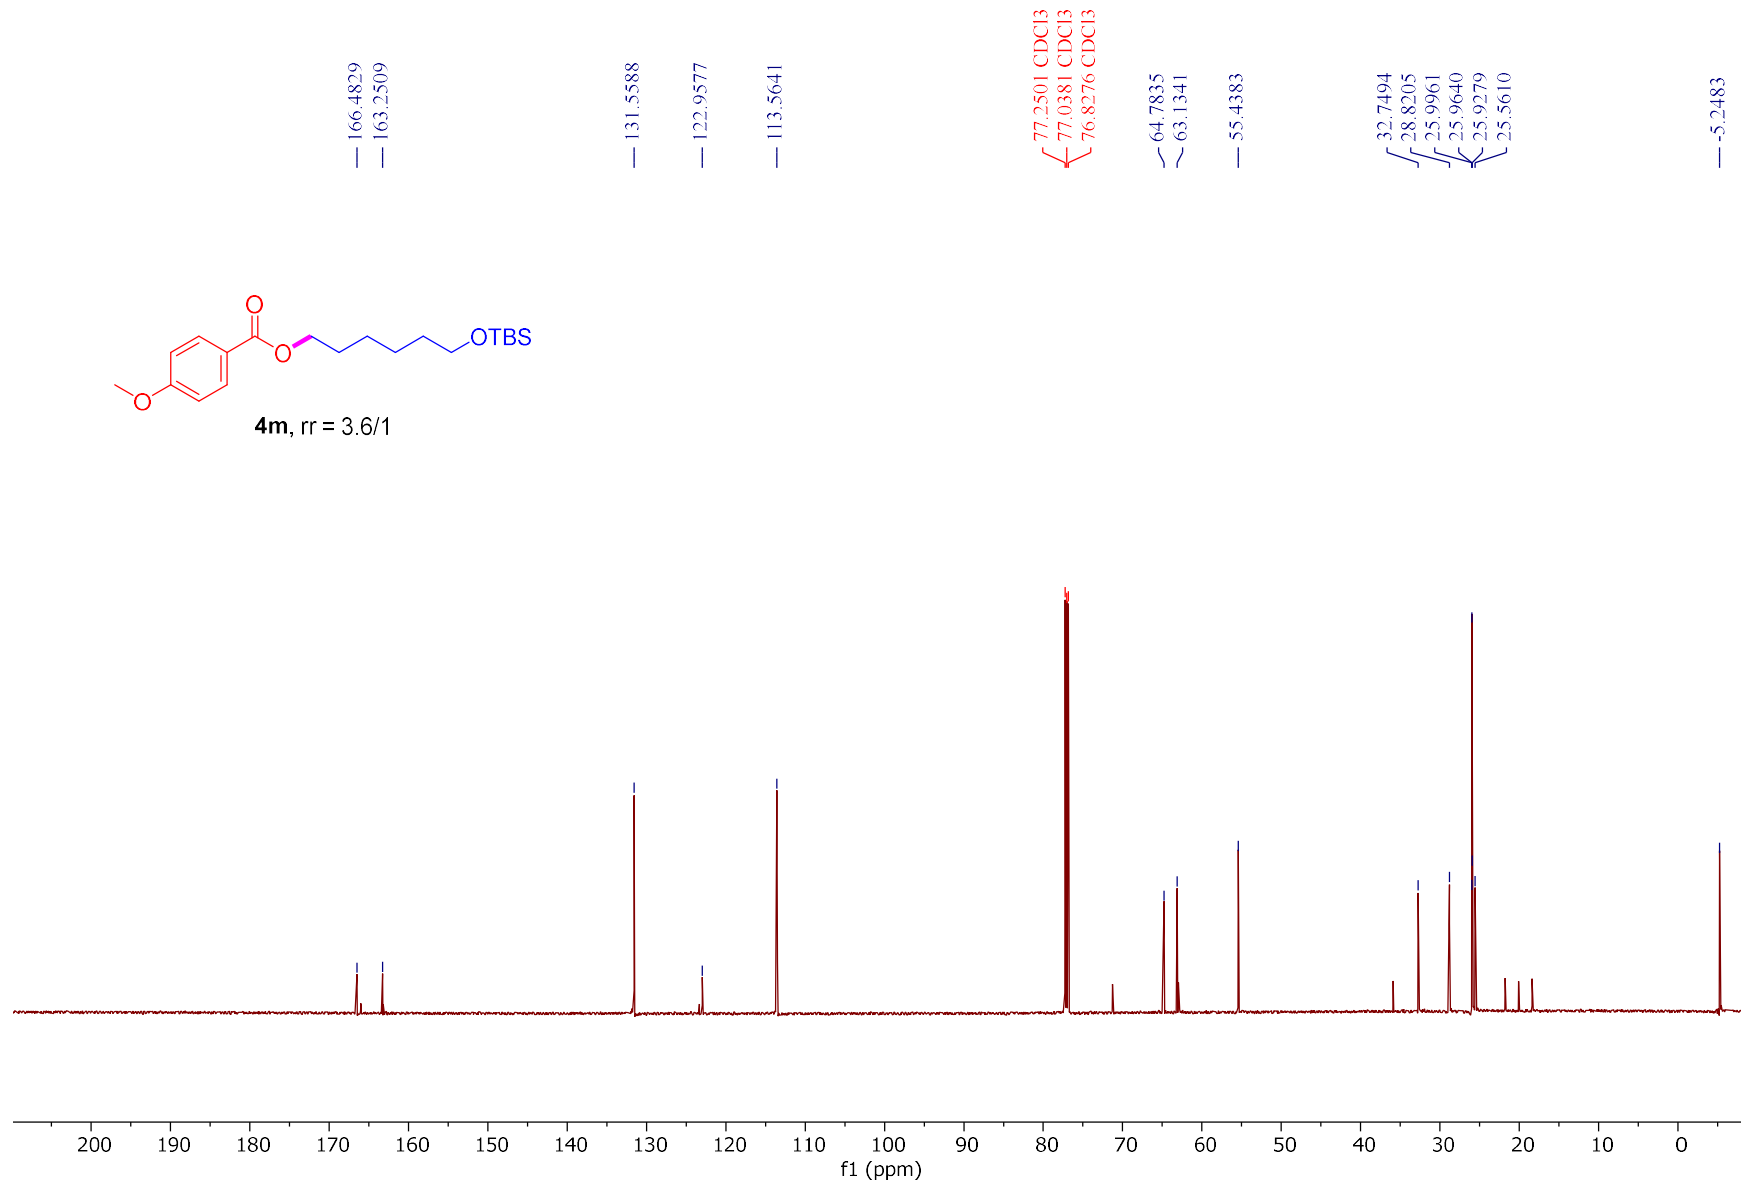

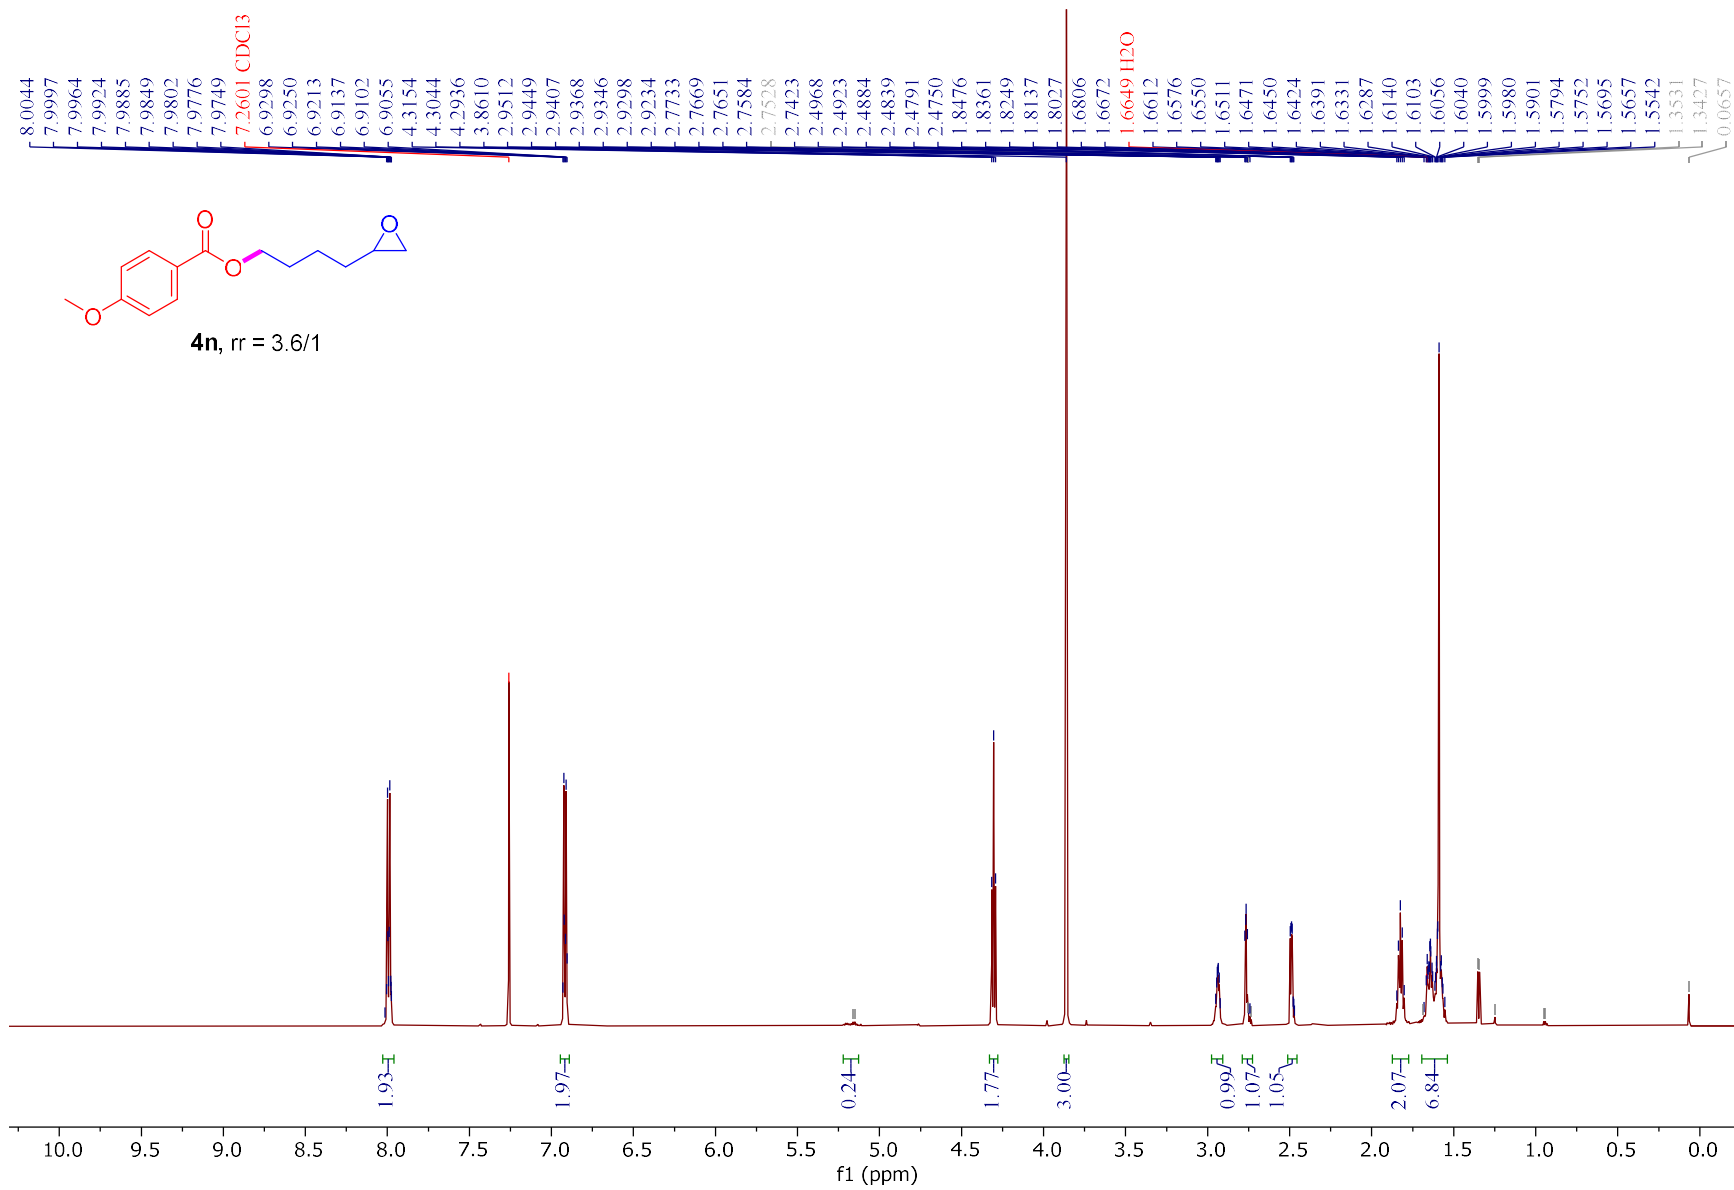

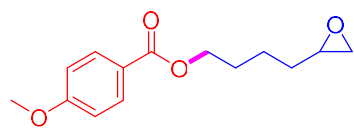

**4n**, rr = 3.6/1

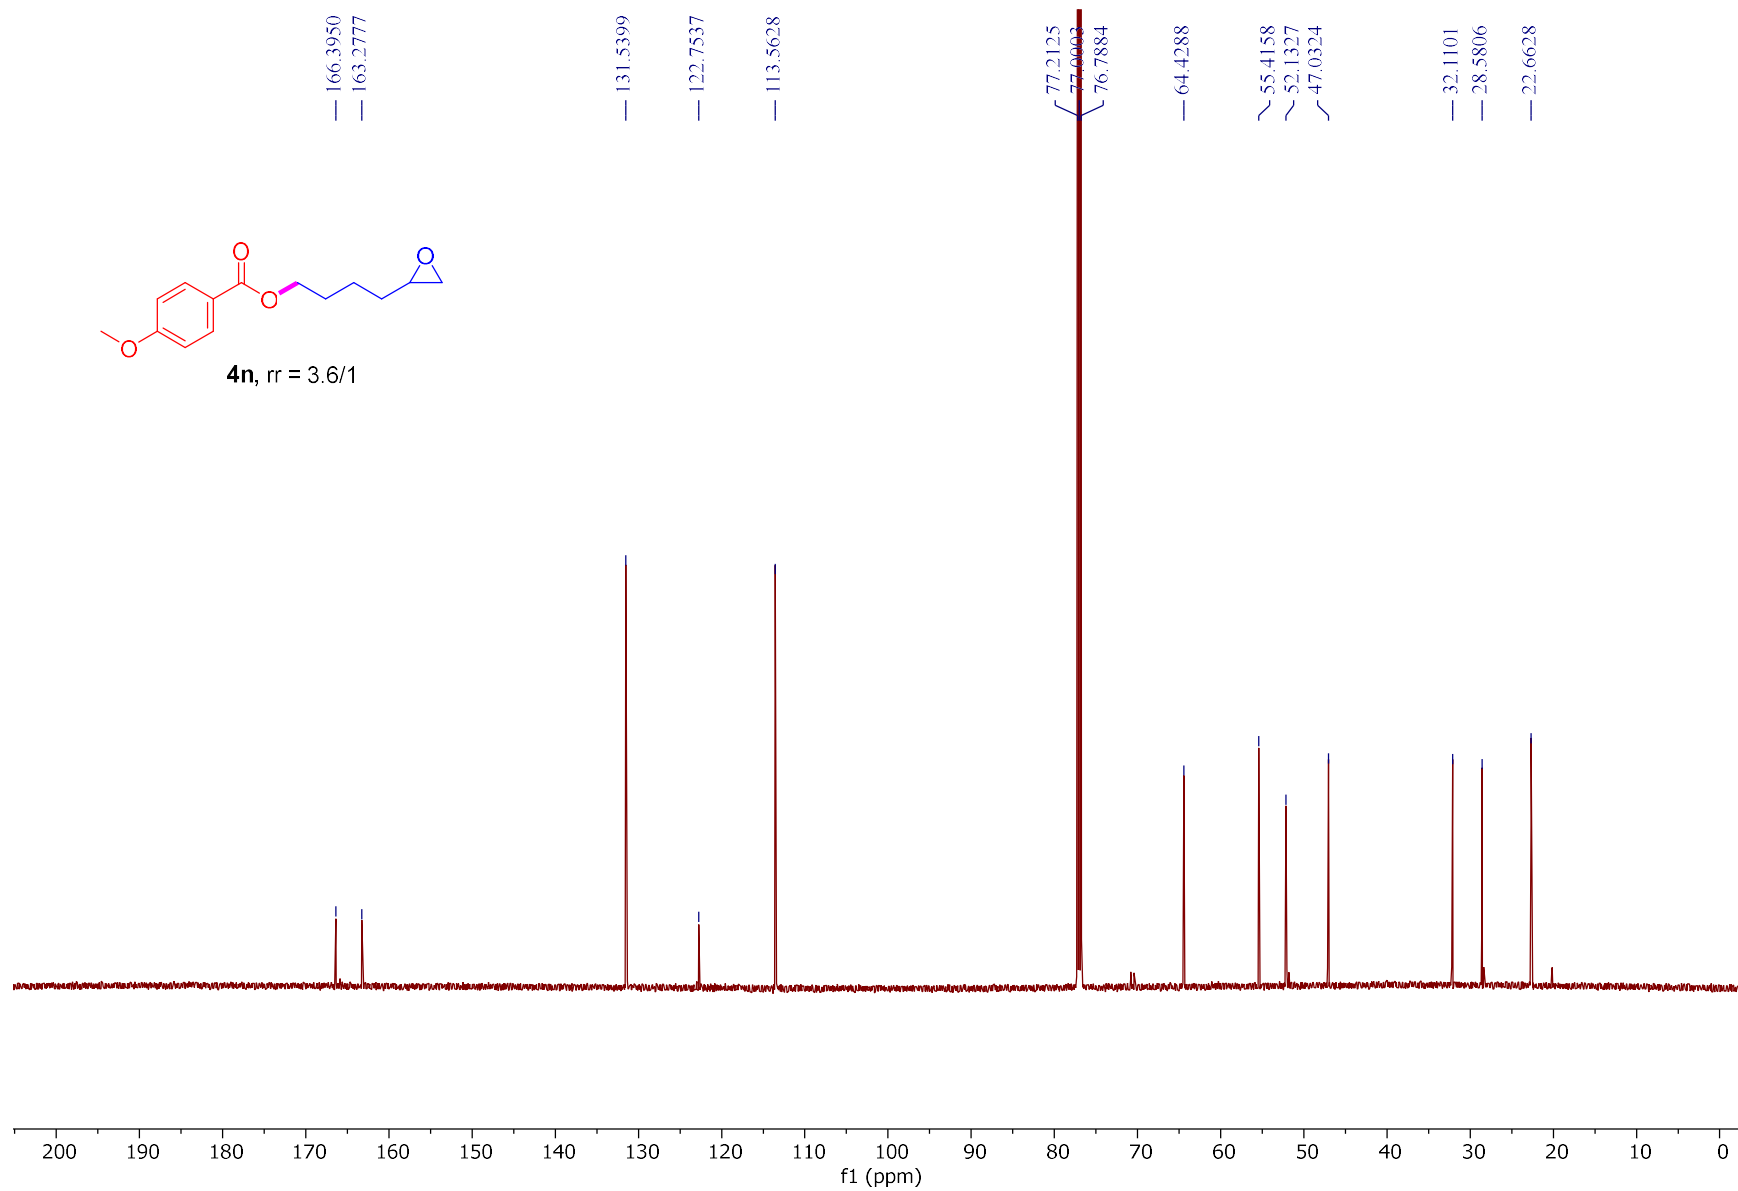

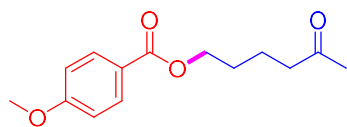

**4o**, rr = 10/1

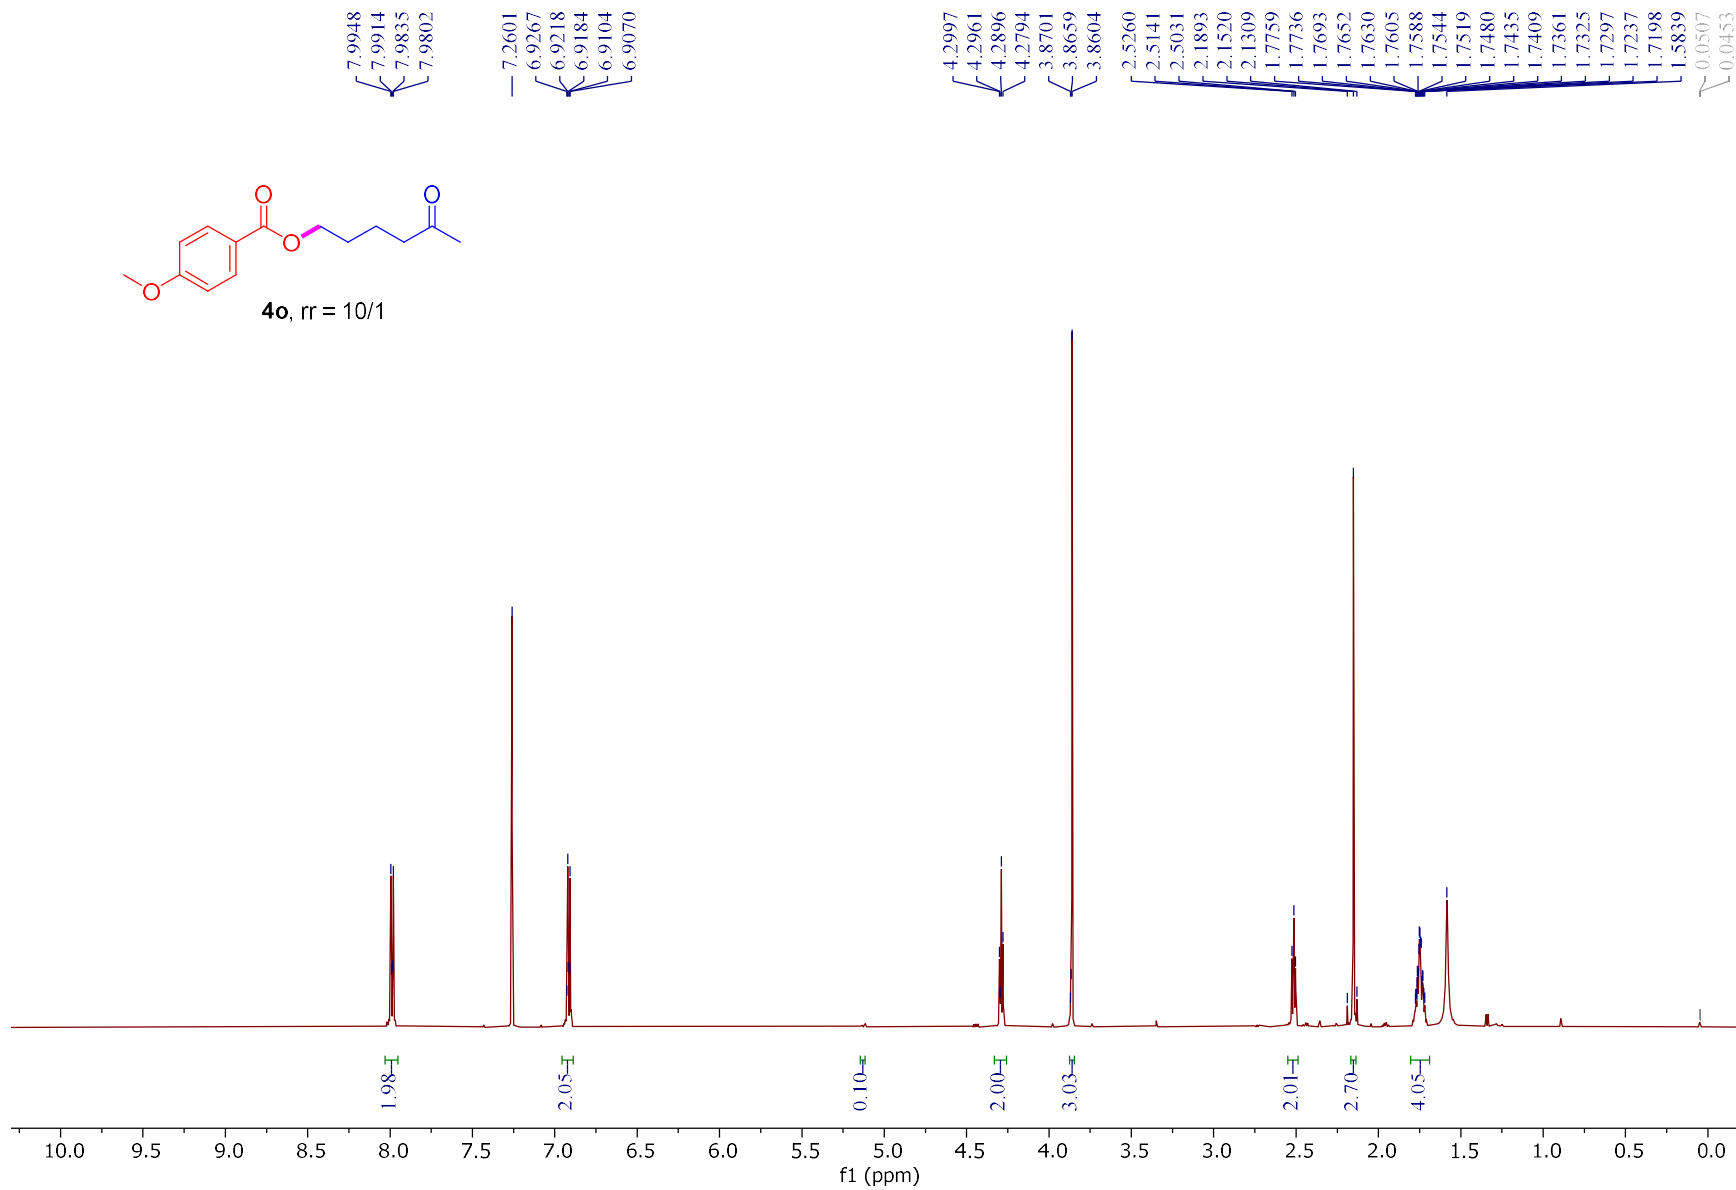

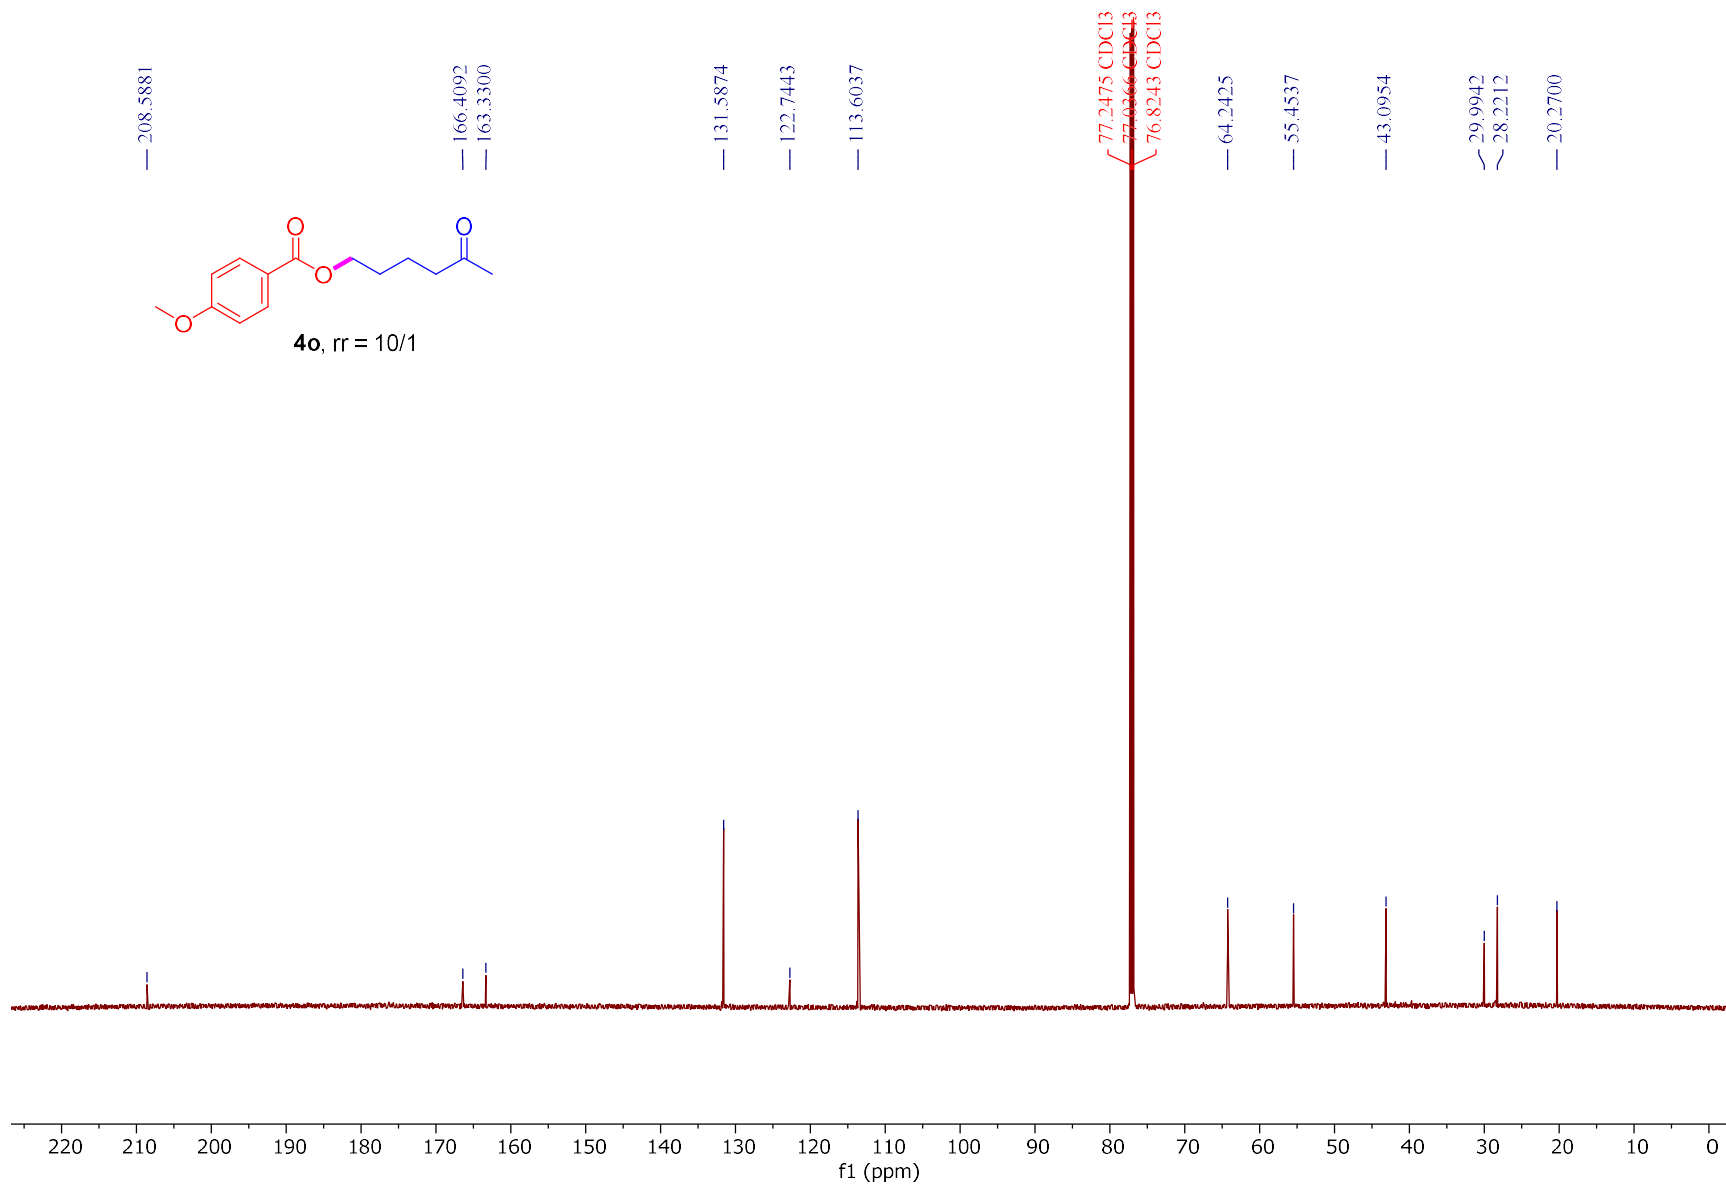

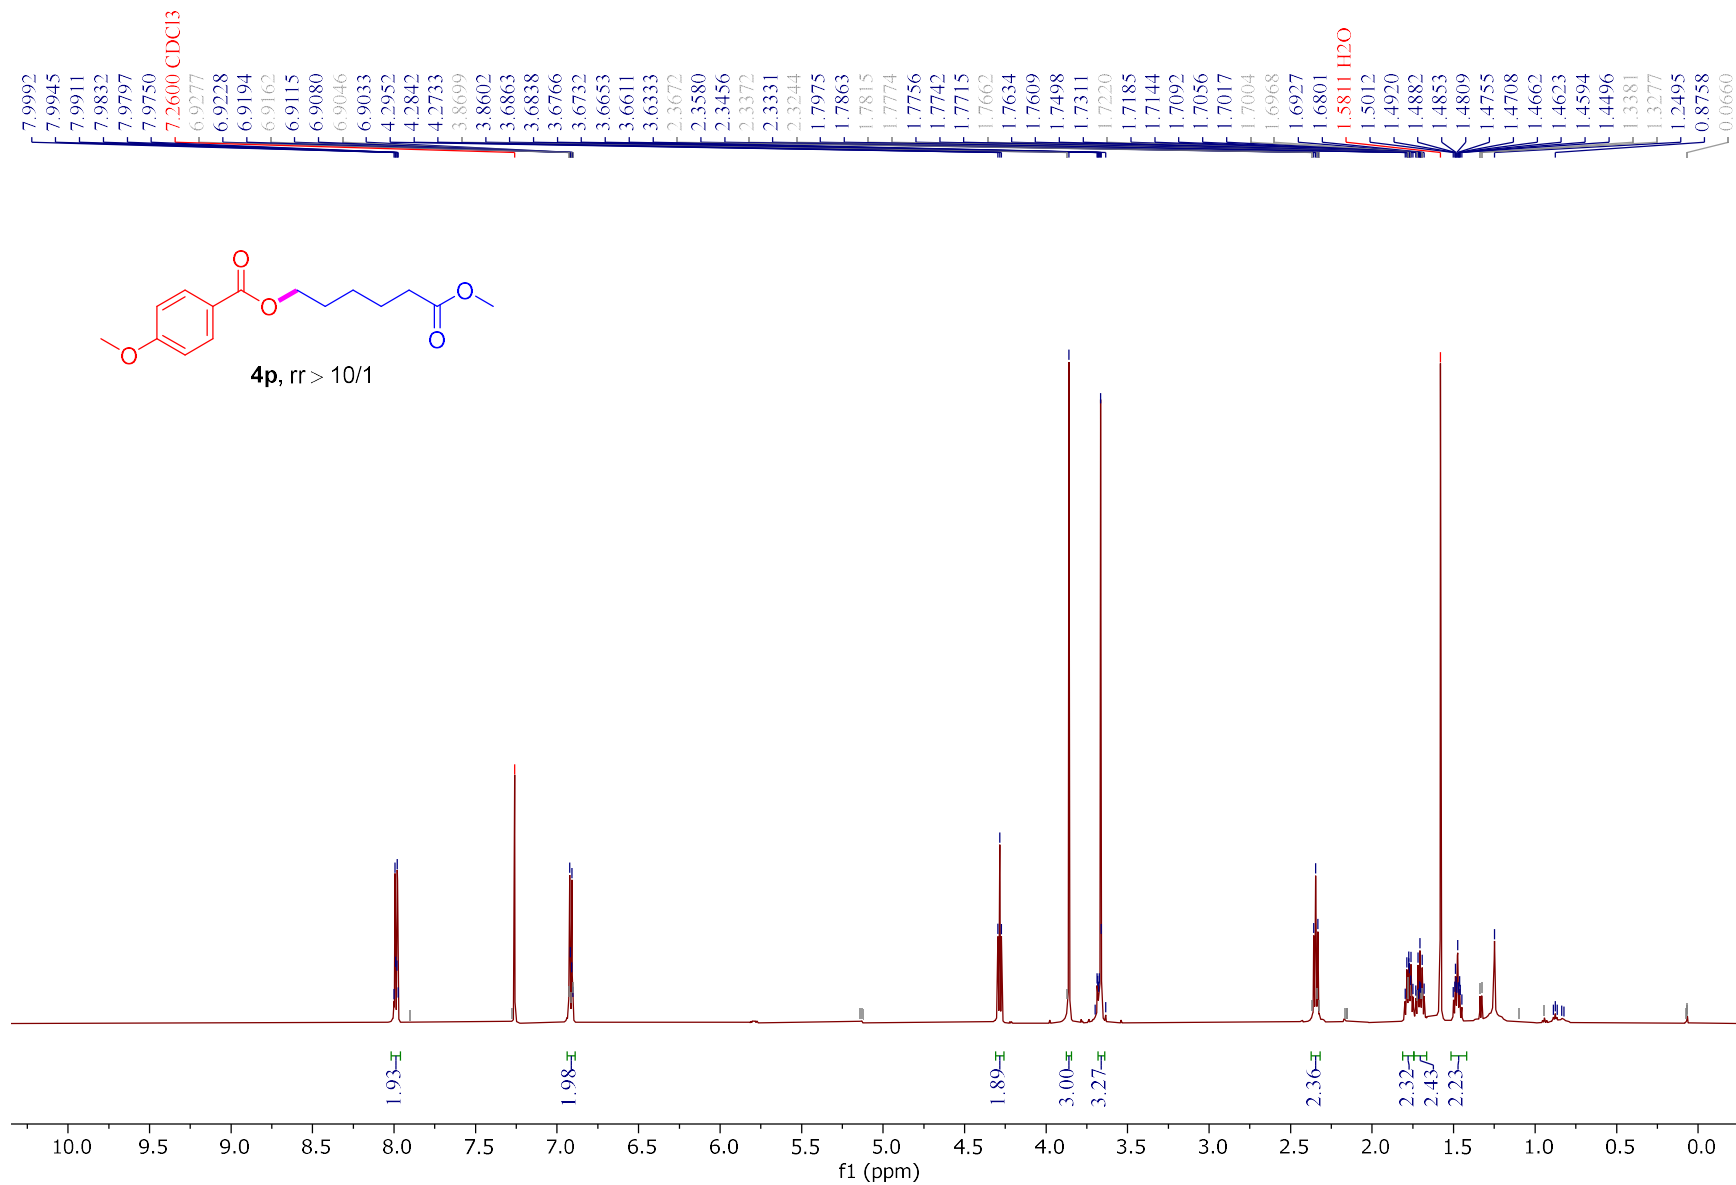

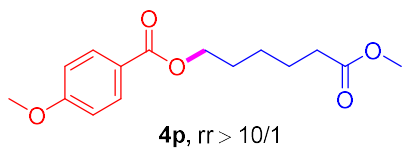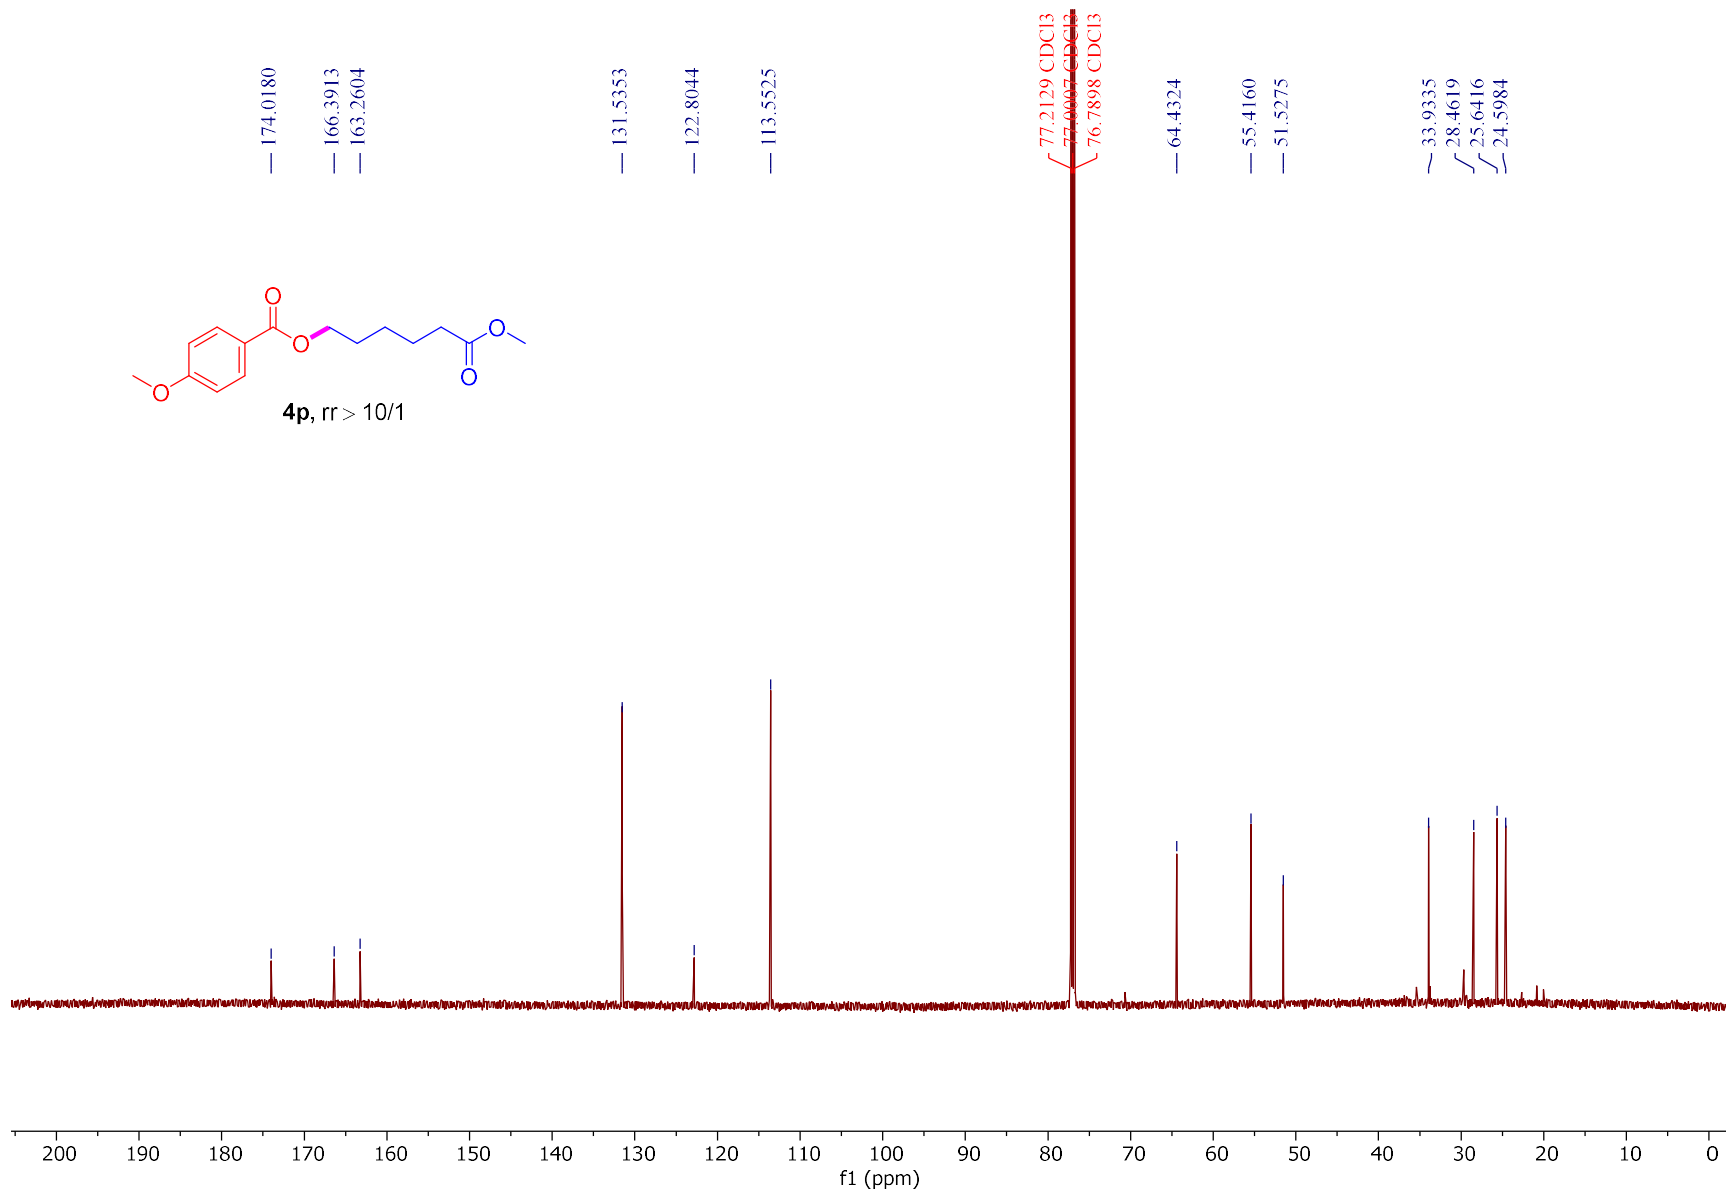

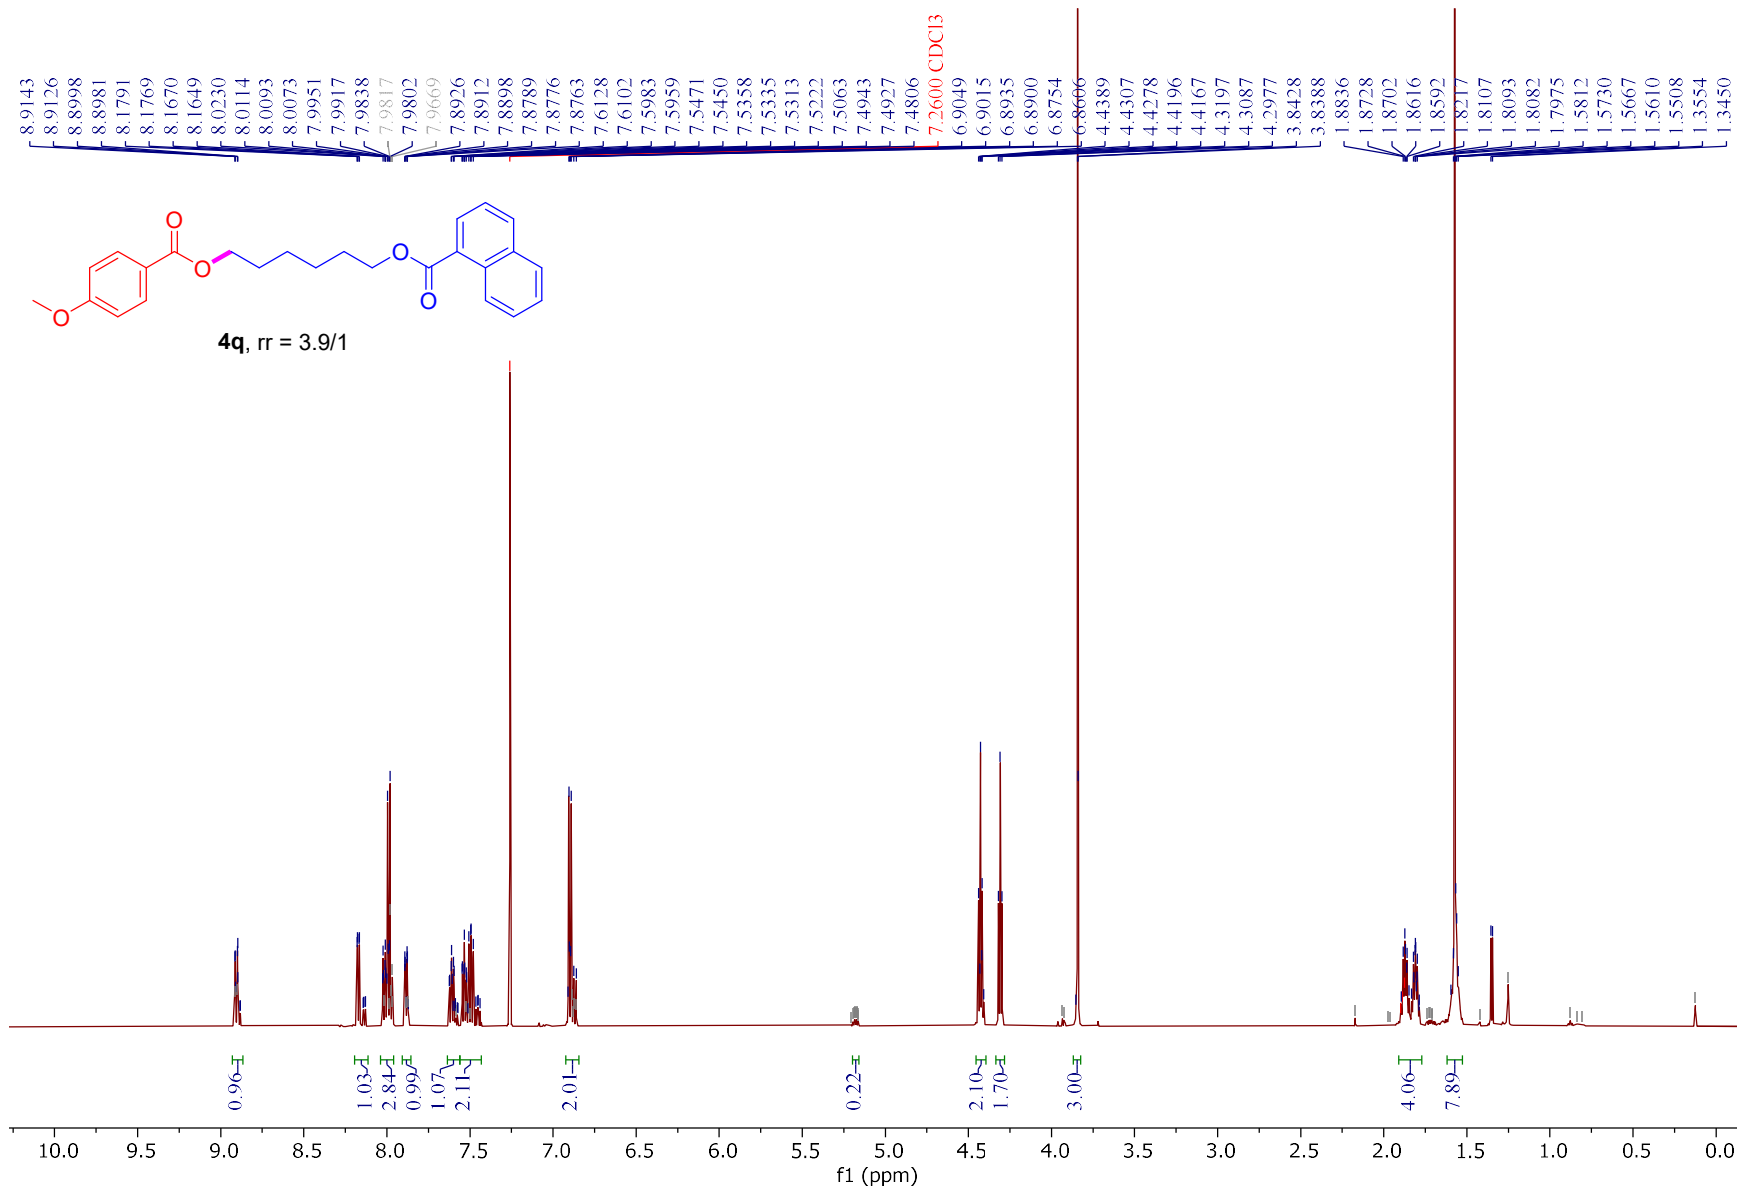



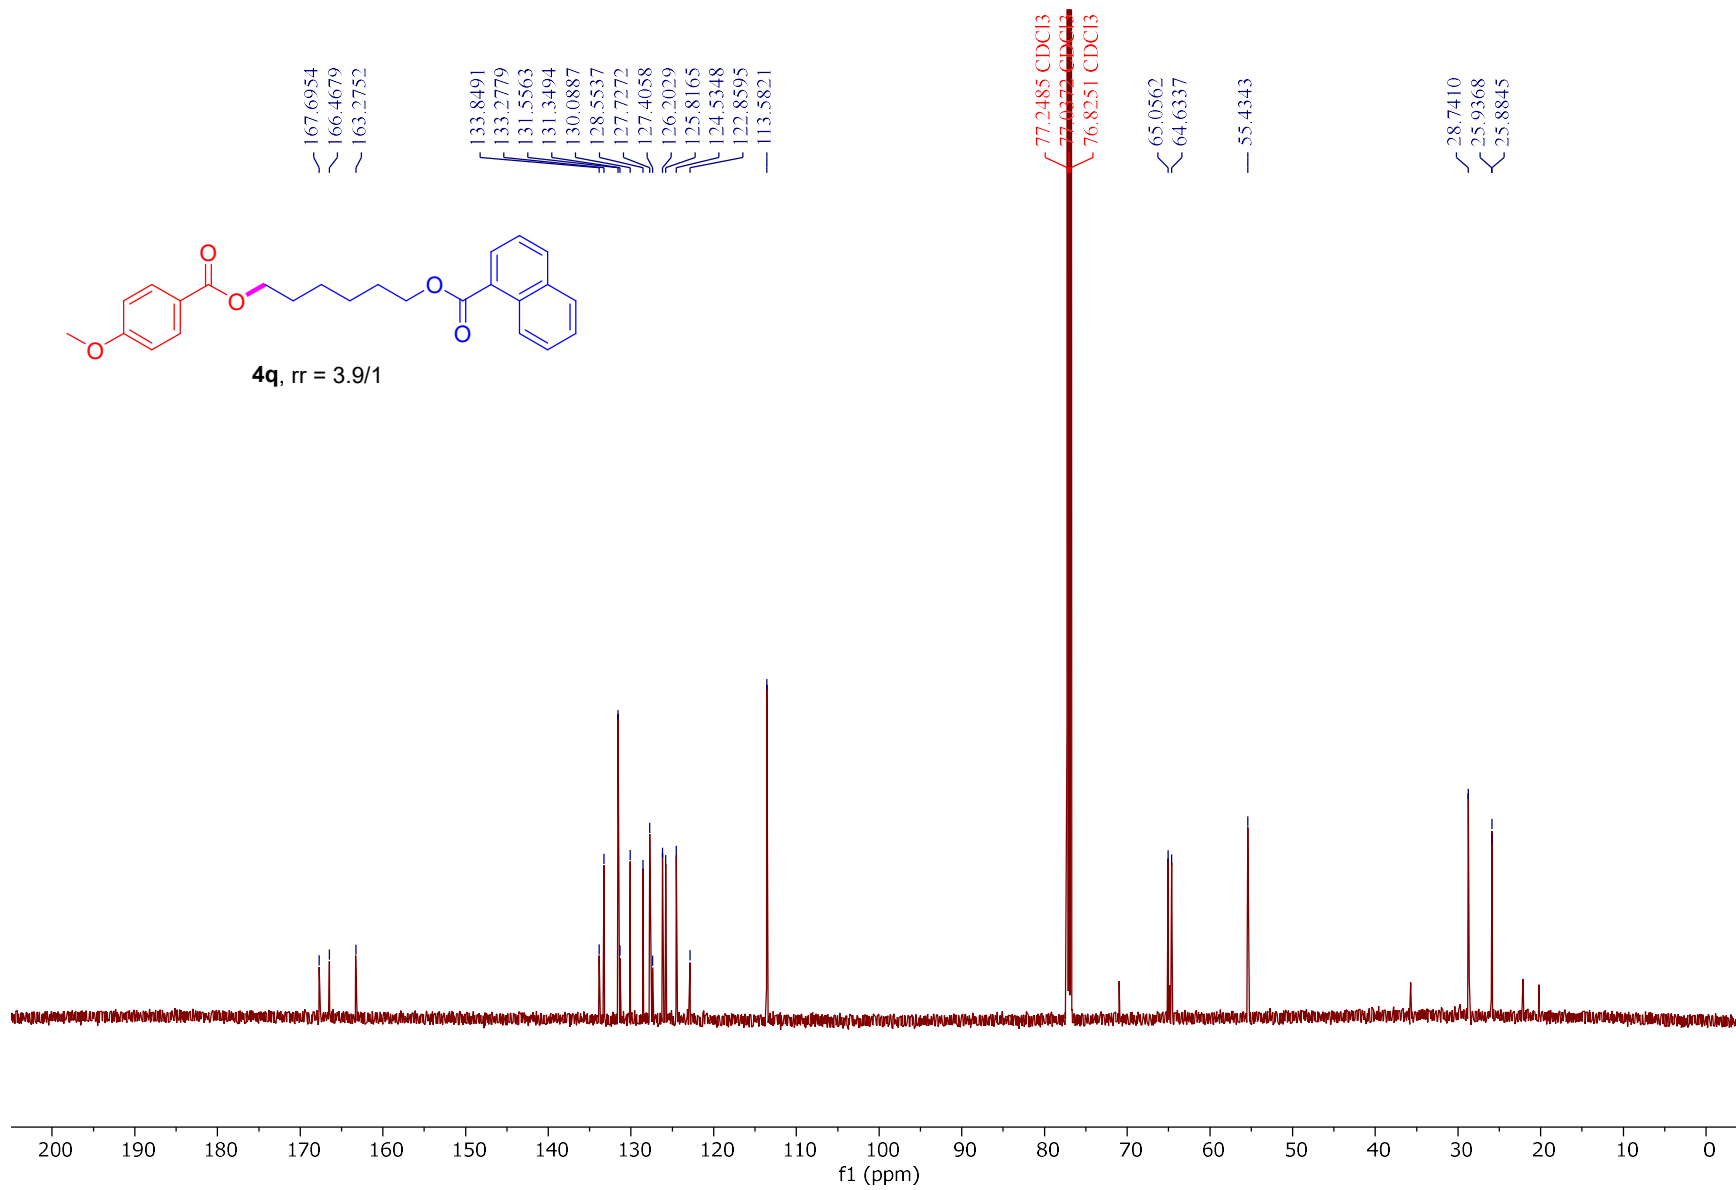

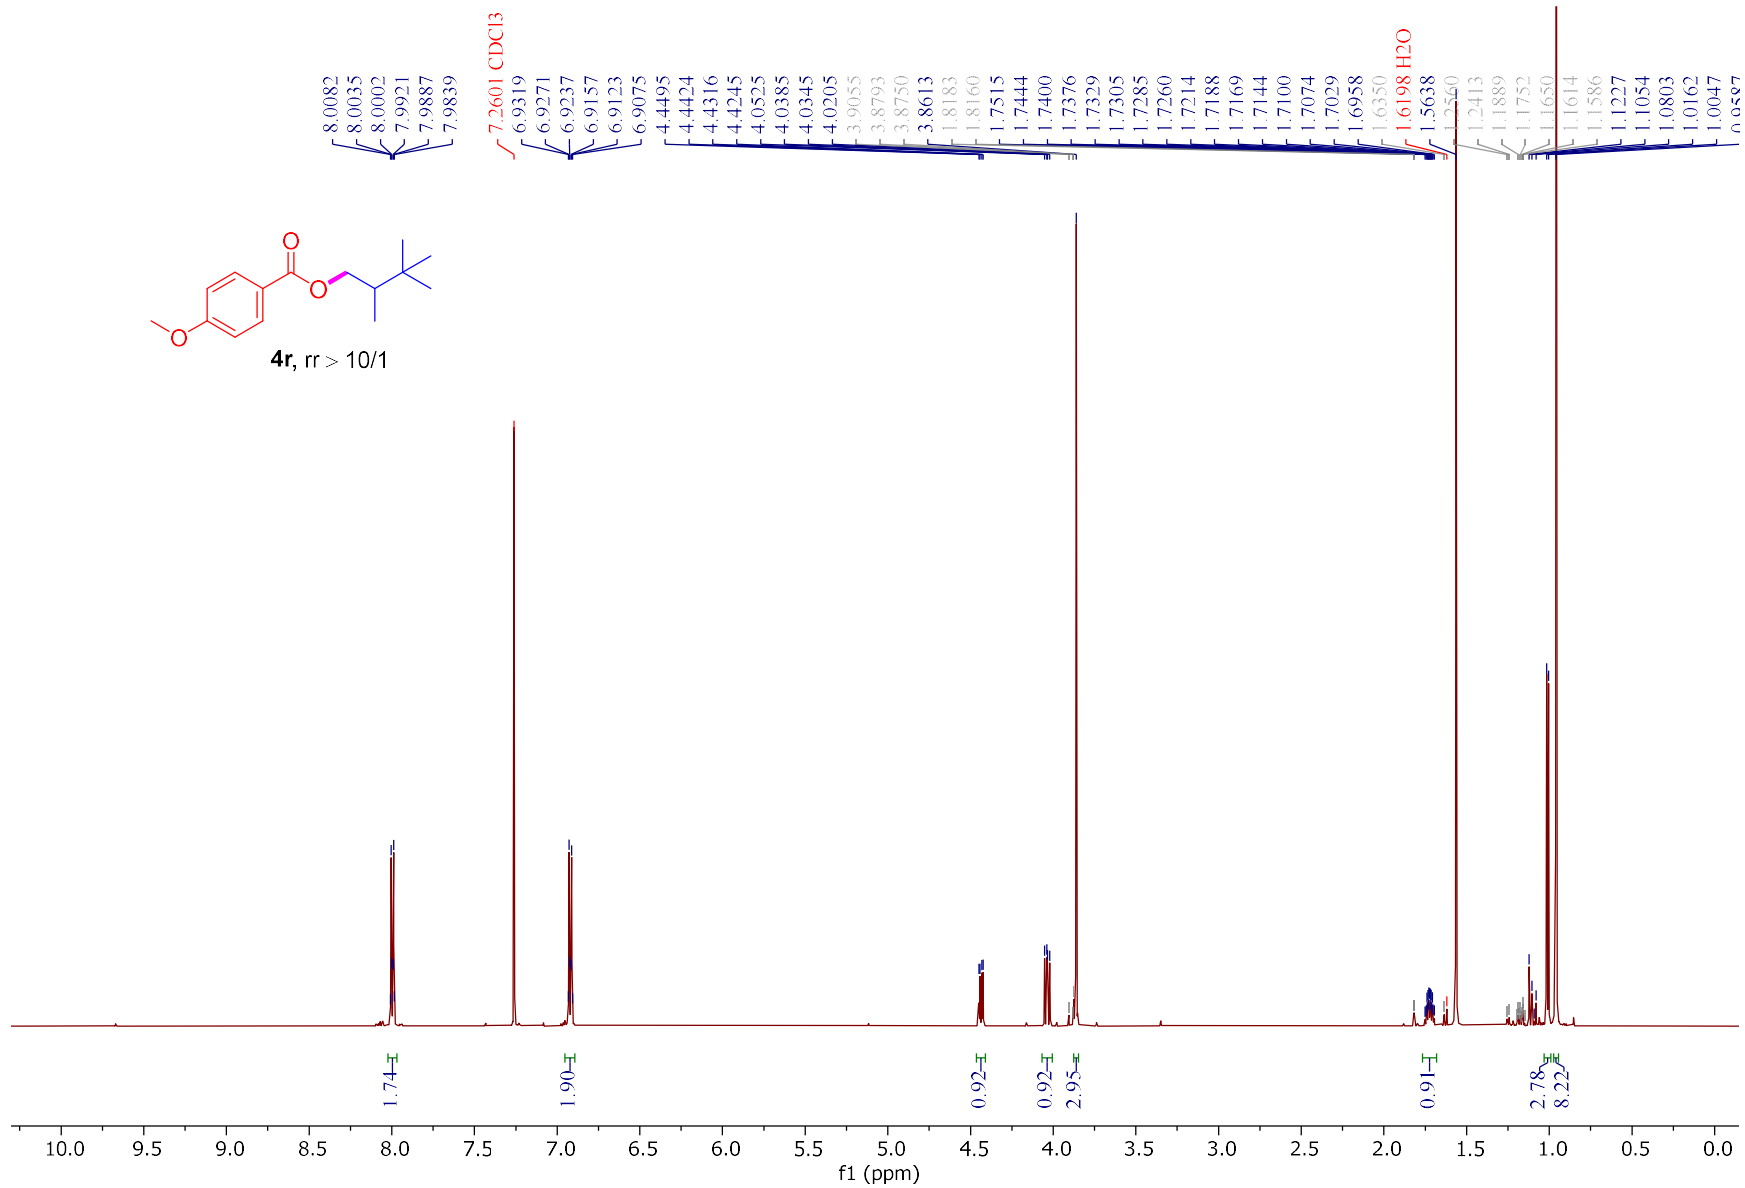

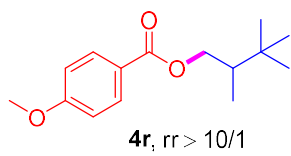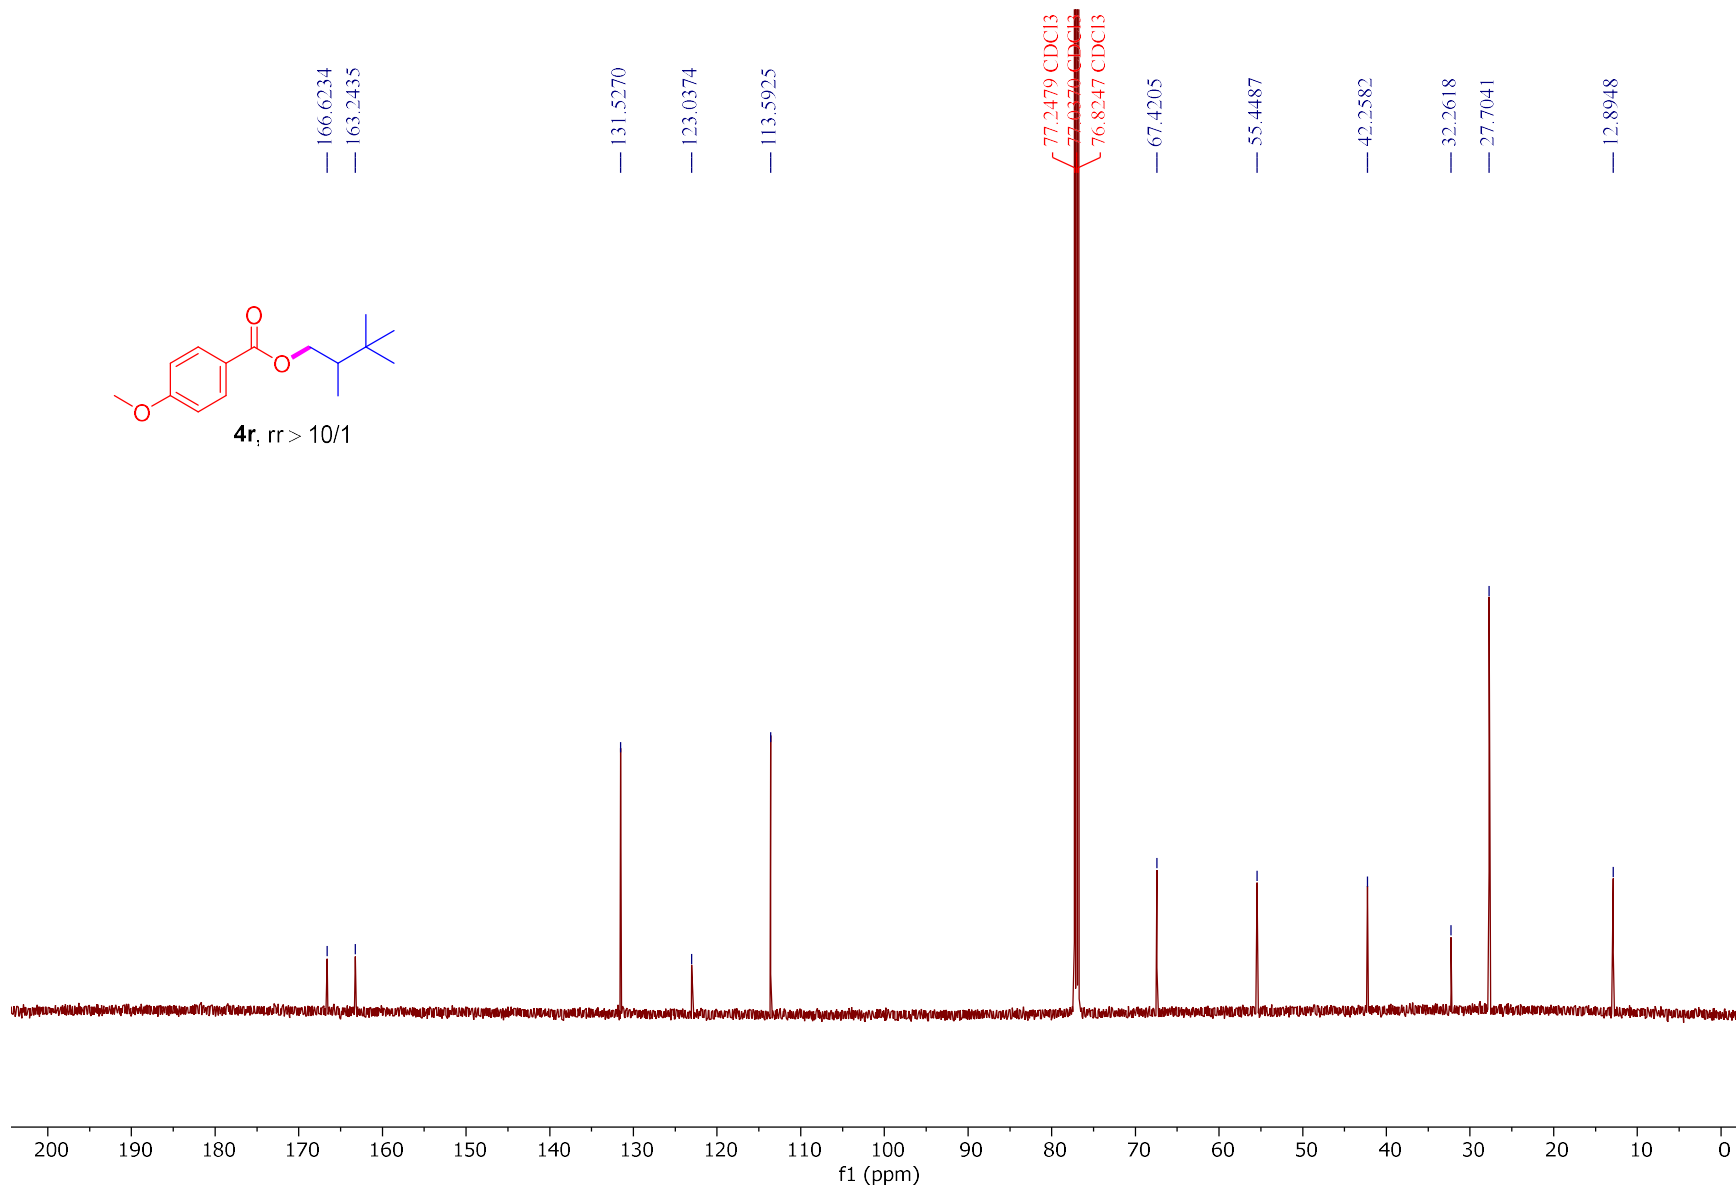

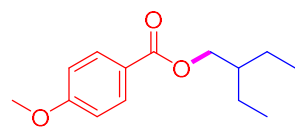

4s, rr > 10/1

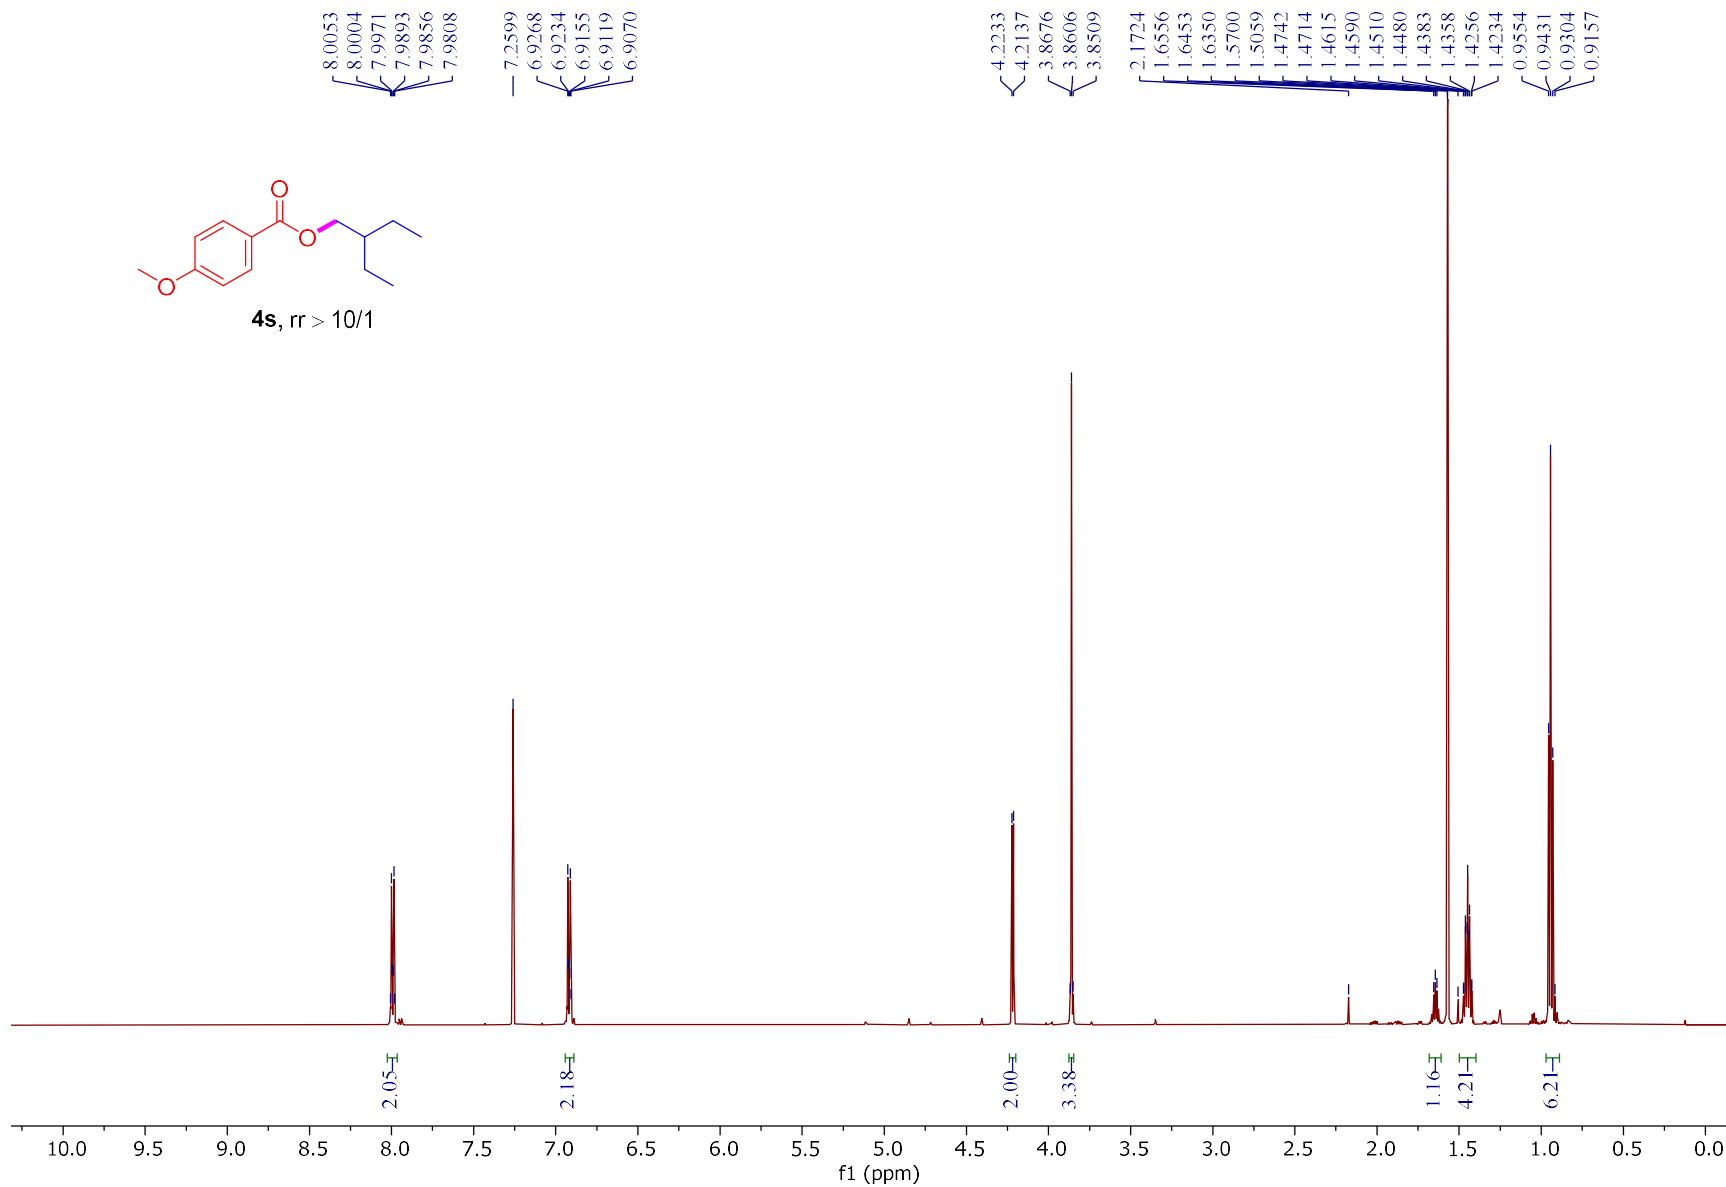

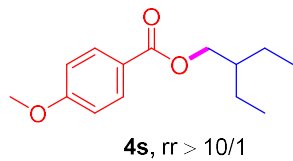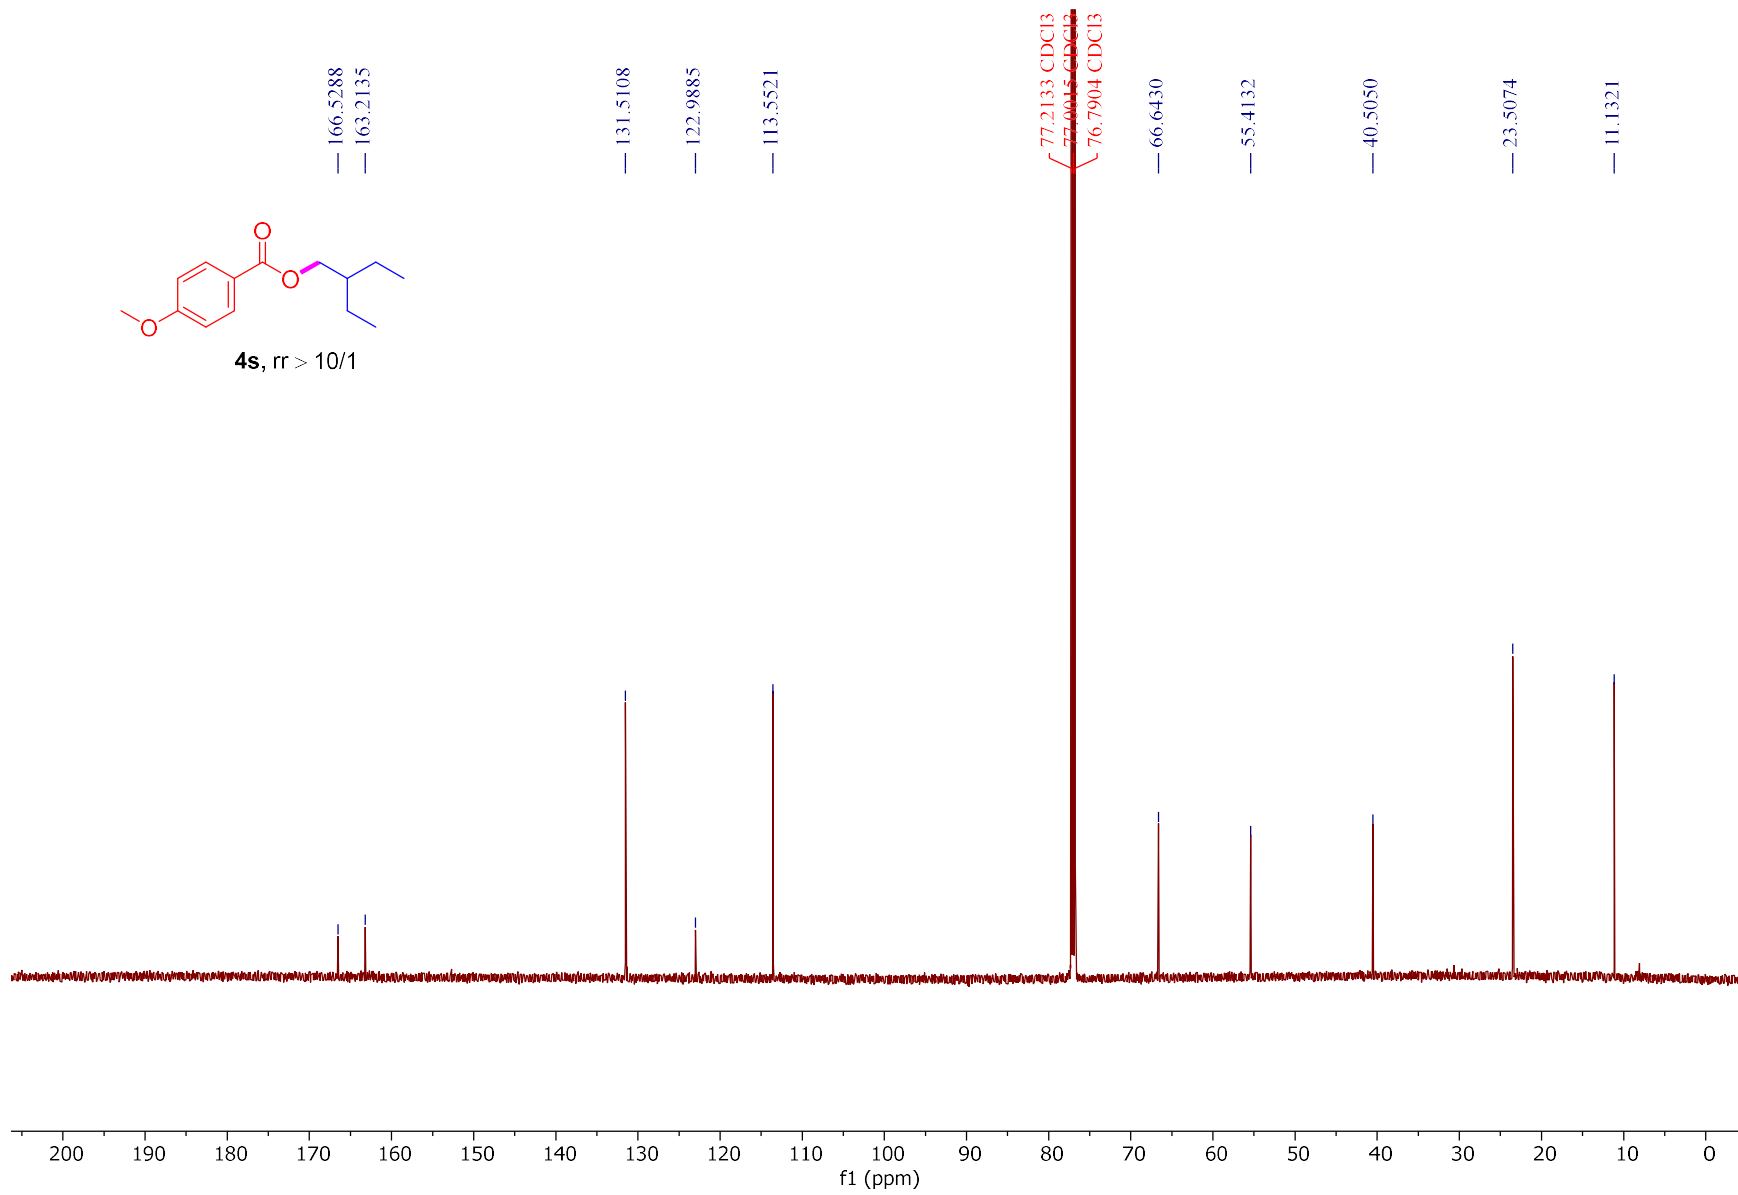

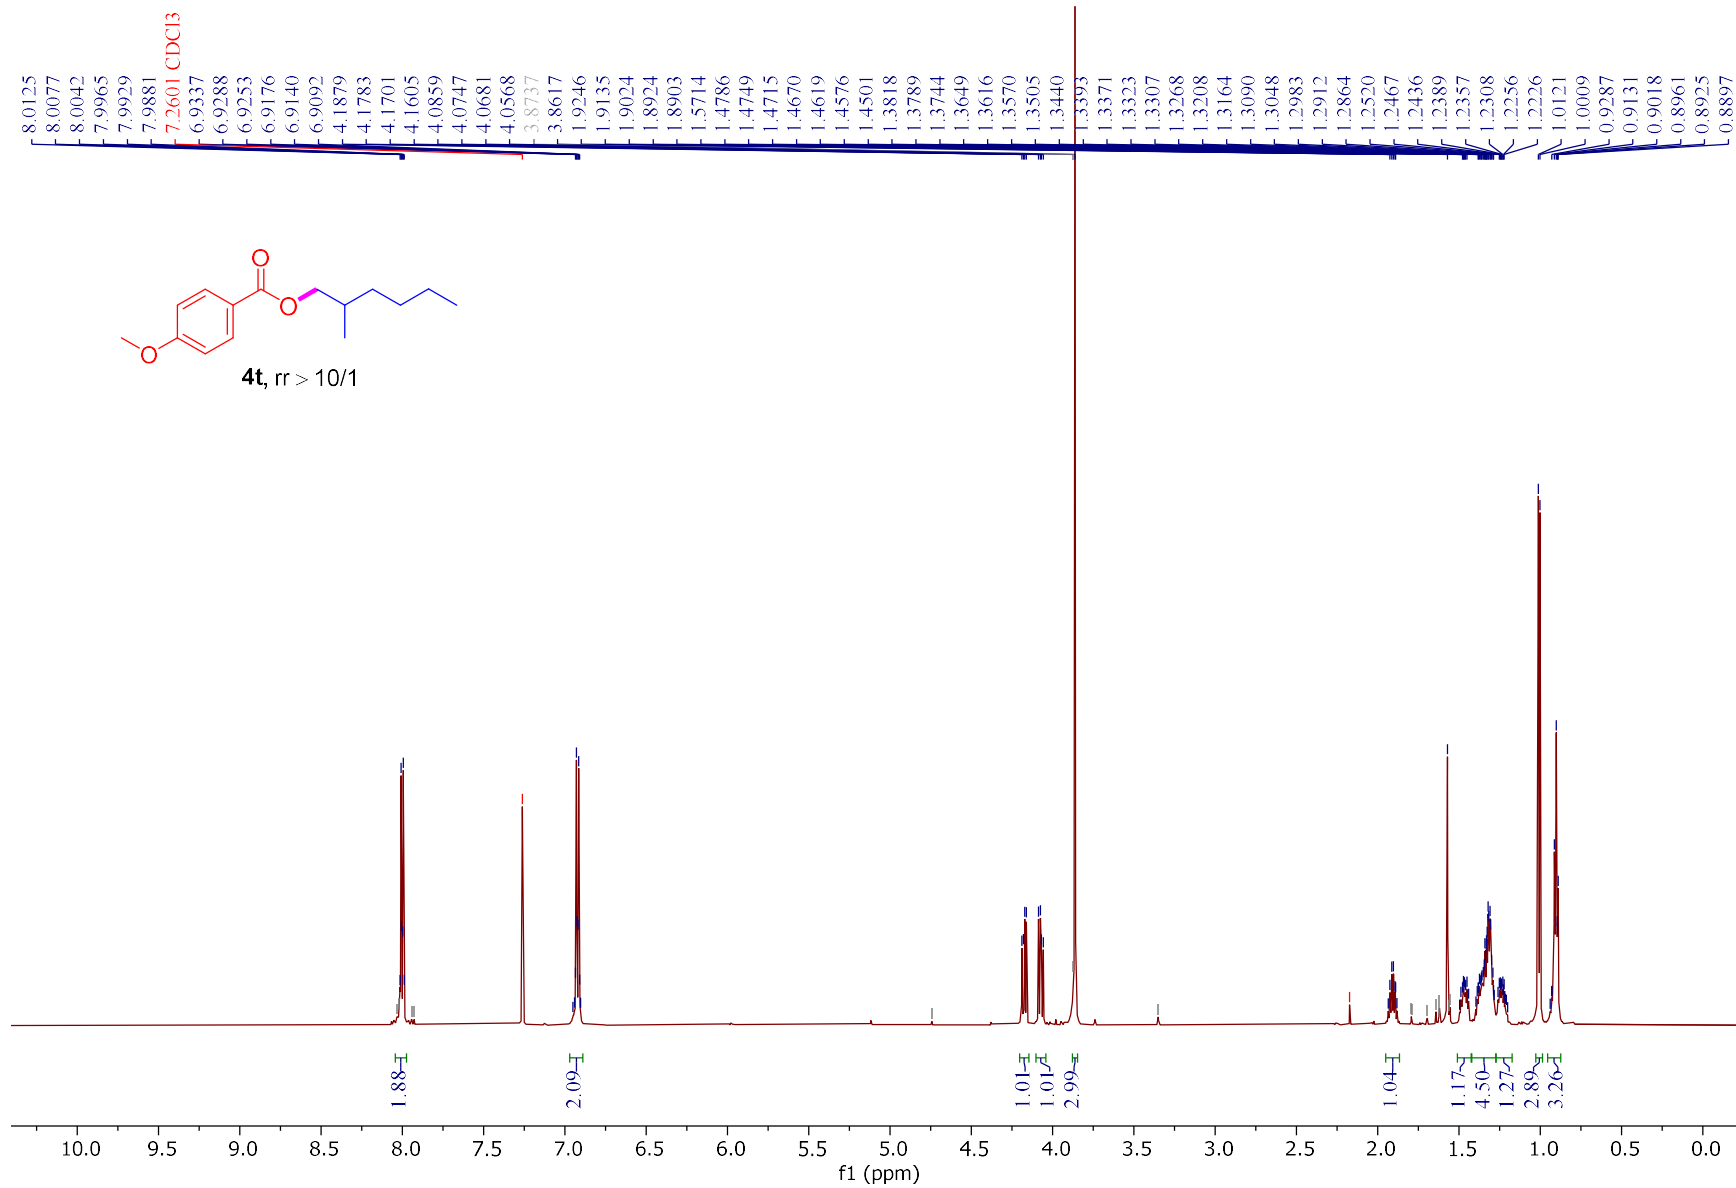

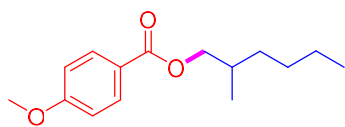

4t, rr > 10/1

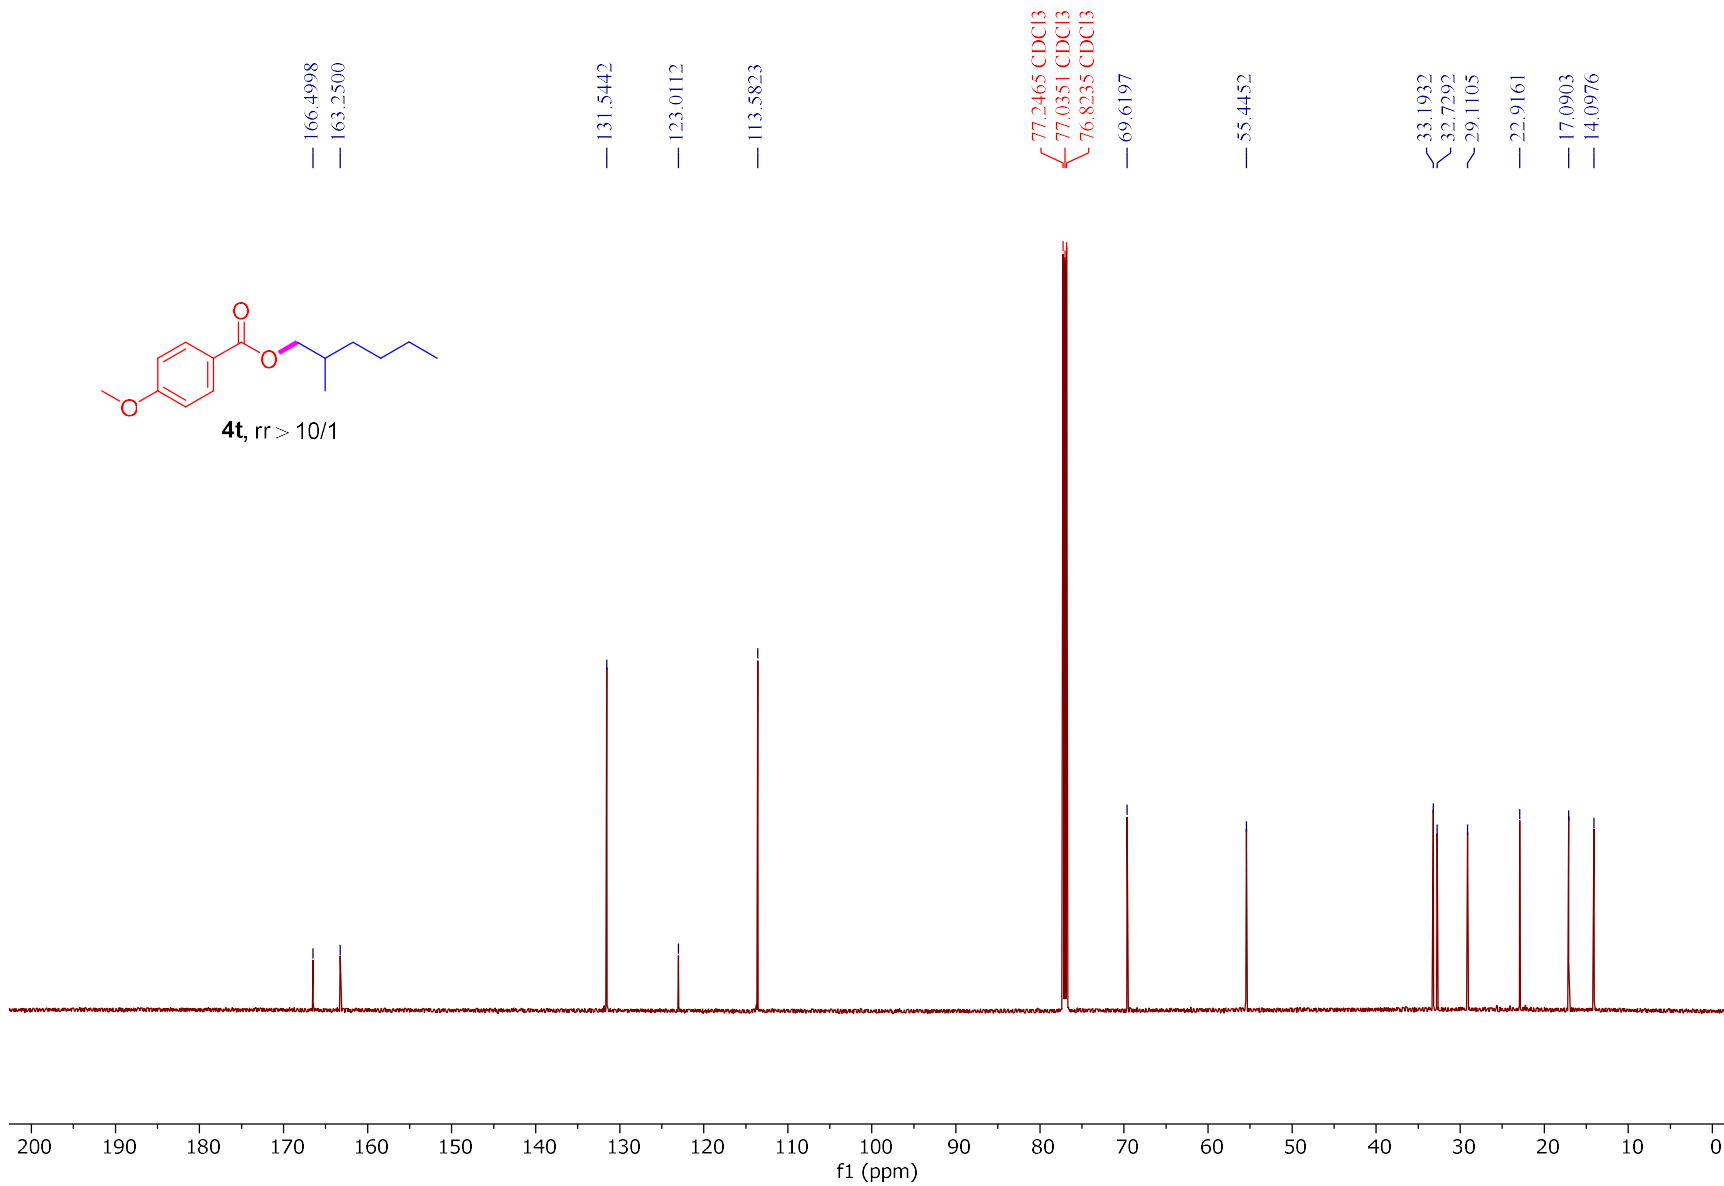

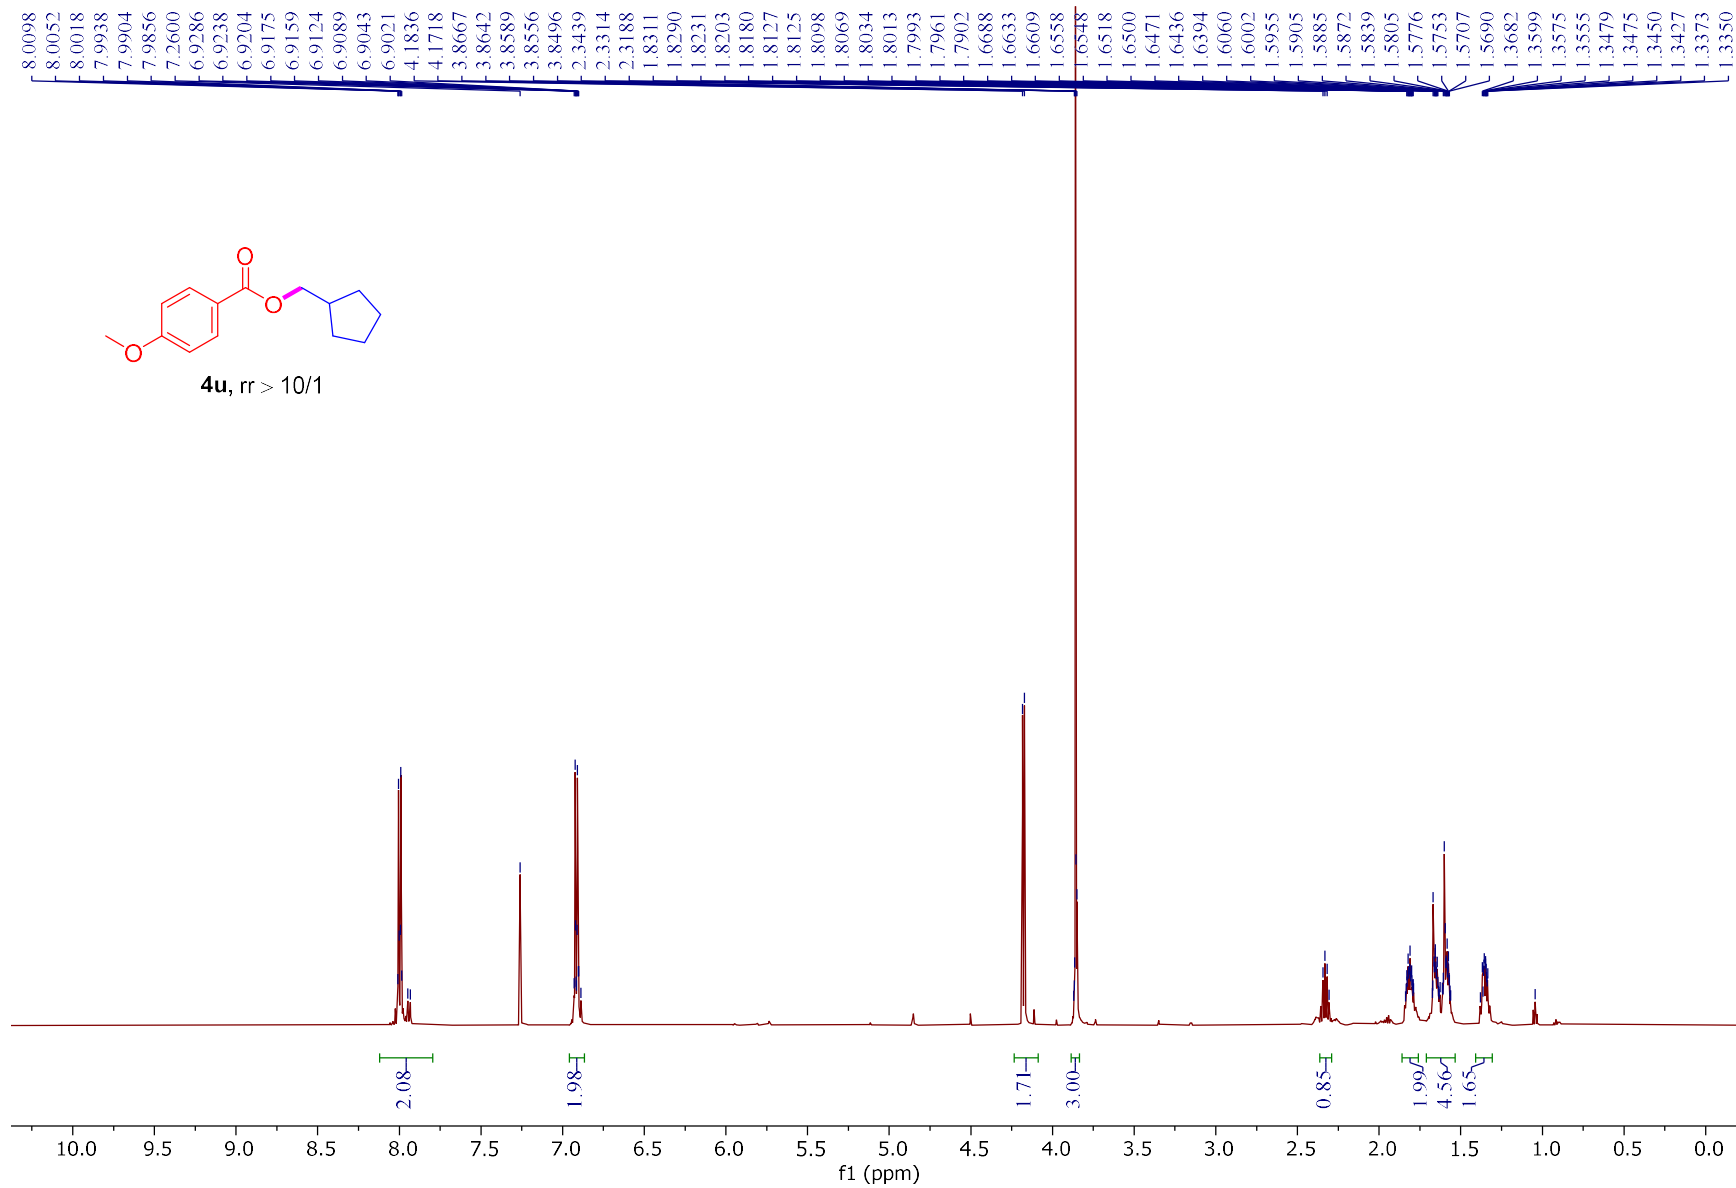



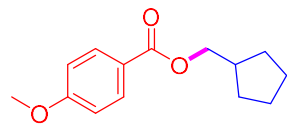

4u, rr > 10/1

— 166.5512  
— 163.2465

— 131.5657  
— 123.0111  
— 113.5676

77.2537  
77.0425  
76.8307  
— 68.6188

— 55.4429

— 38.7218

— 29.4306  
— 25.4004

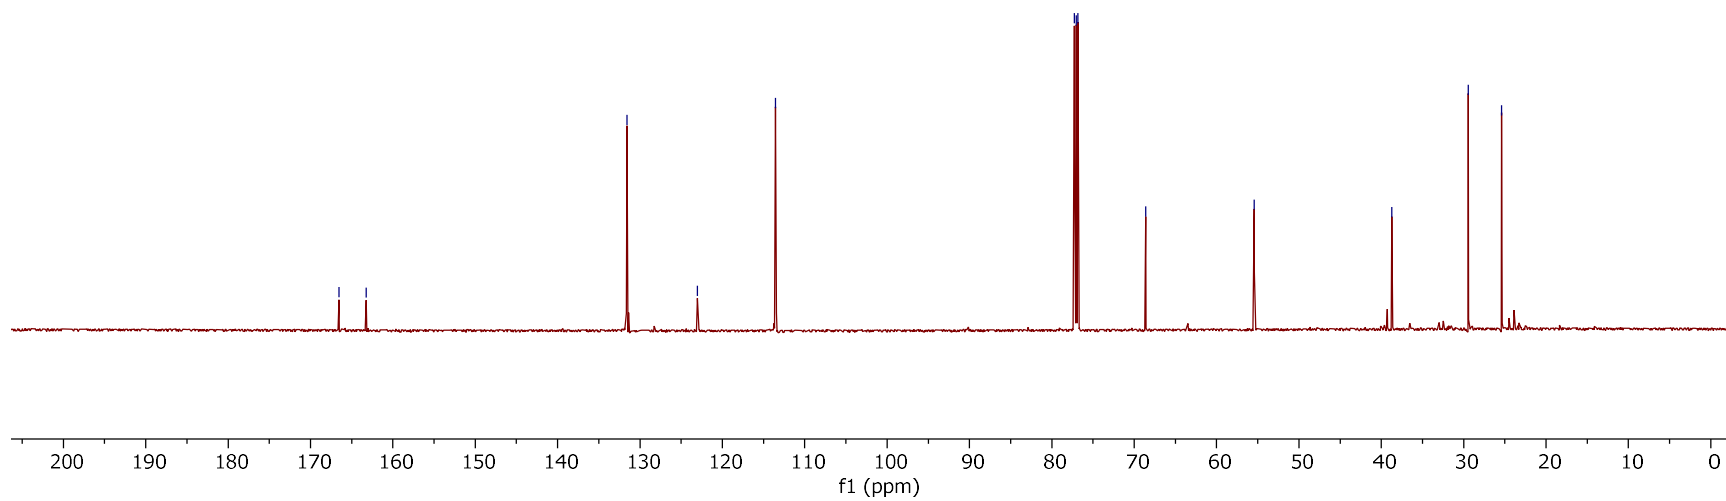

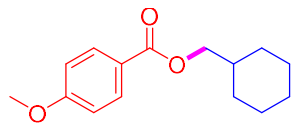

4v, rr > 10/1

8.0087  
8.0063  
7.9940  
7.9938  
7.9920  
7.9864  
7.2615  
7.2594  
6.9305  
6.9237  
6.9109  
6.9088

4.1038  
4.0931  
3.8614  
3.8593  
1.8354  
1.8295  
1.8138  
1.8083  
1.8026  
1.7795  
1.7732  
1.7670  
1.7606  
1.7503  
1.7443  
1.7385  
1.7076  
1.7039  
1.7007  
1.6879  
1.6812  
1.6751  
1.5906  
1.5747  
1.2972  
1.2911  
1.2849  
1.2758  
1.2700  
1.2643  
1.2548  
1.2493  
1.2034  
1.1828  
1.0906  
1.0849  
1.0701  
1.0643  
1.0501  
1.0443

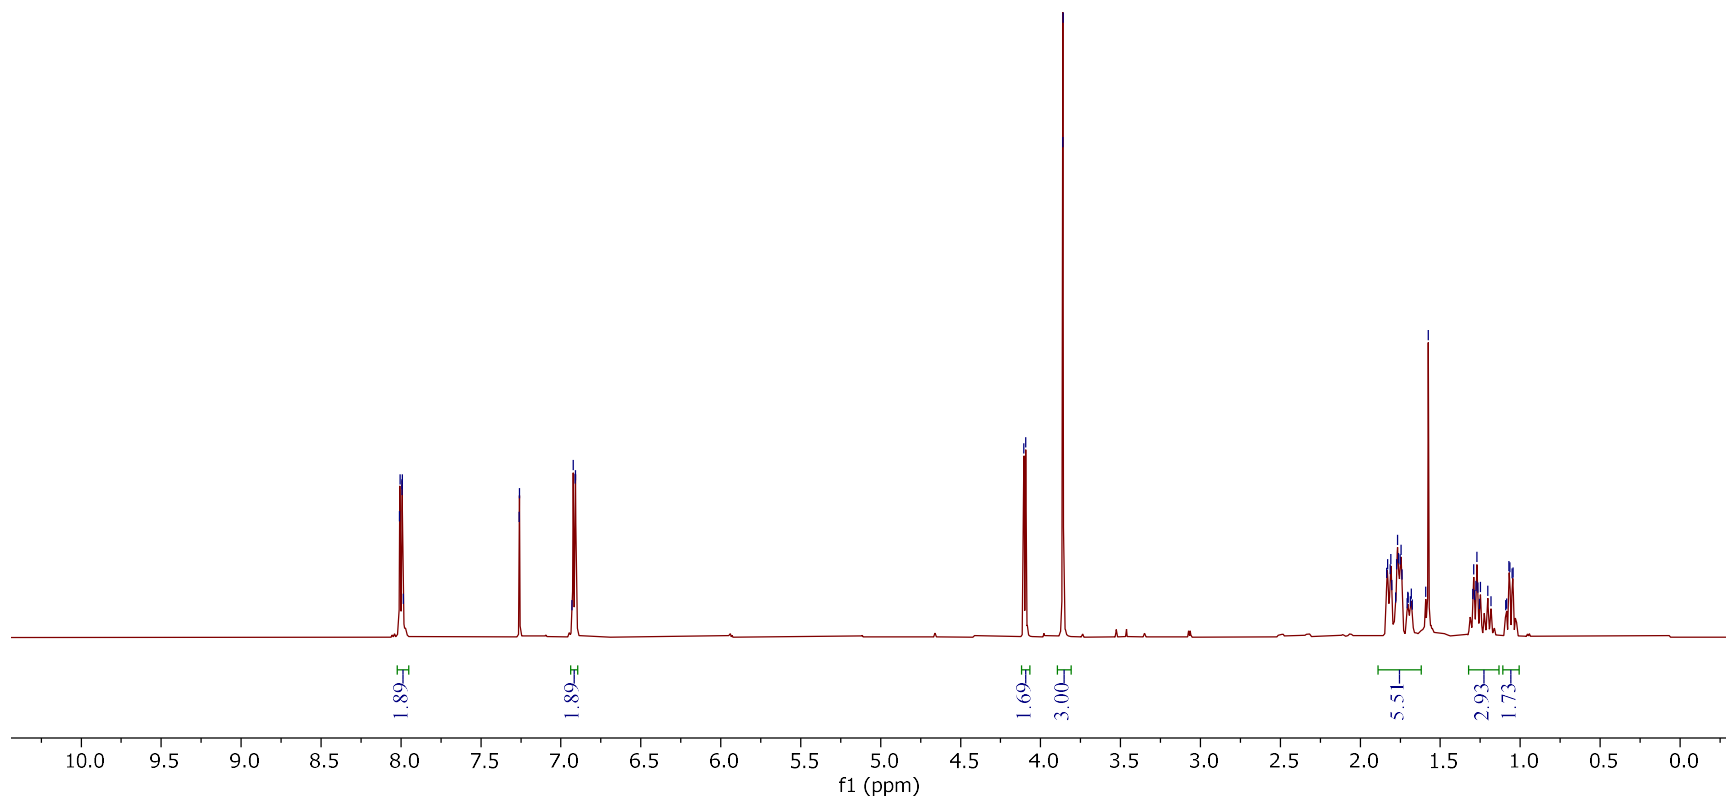

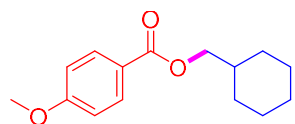

4v, rr > 10/1

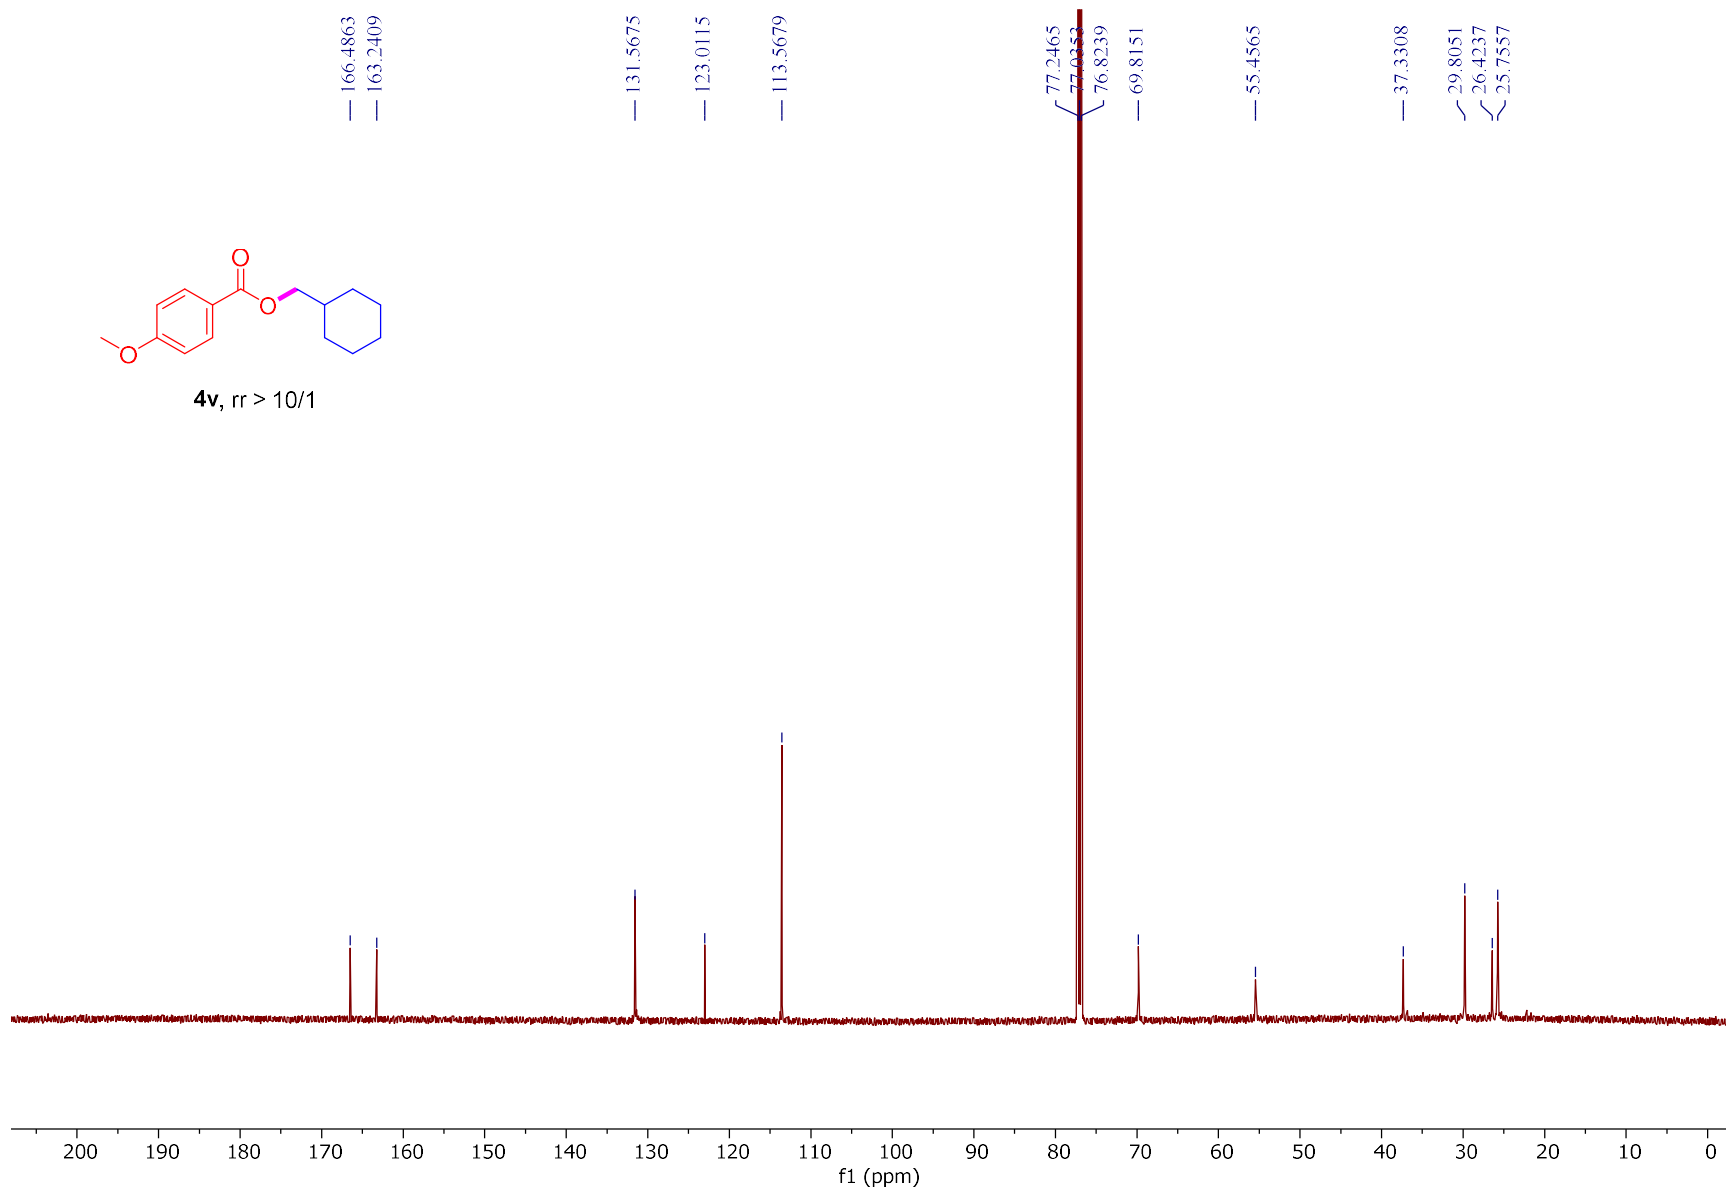

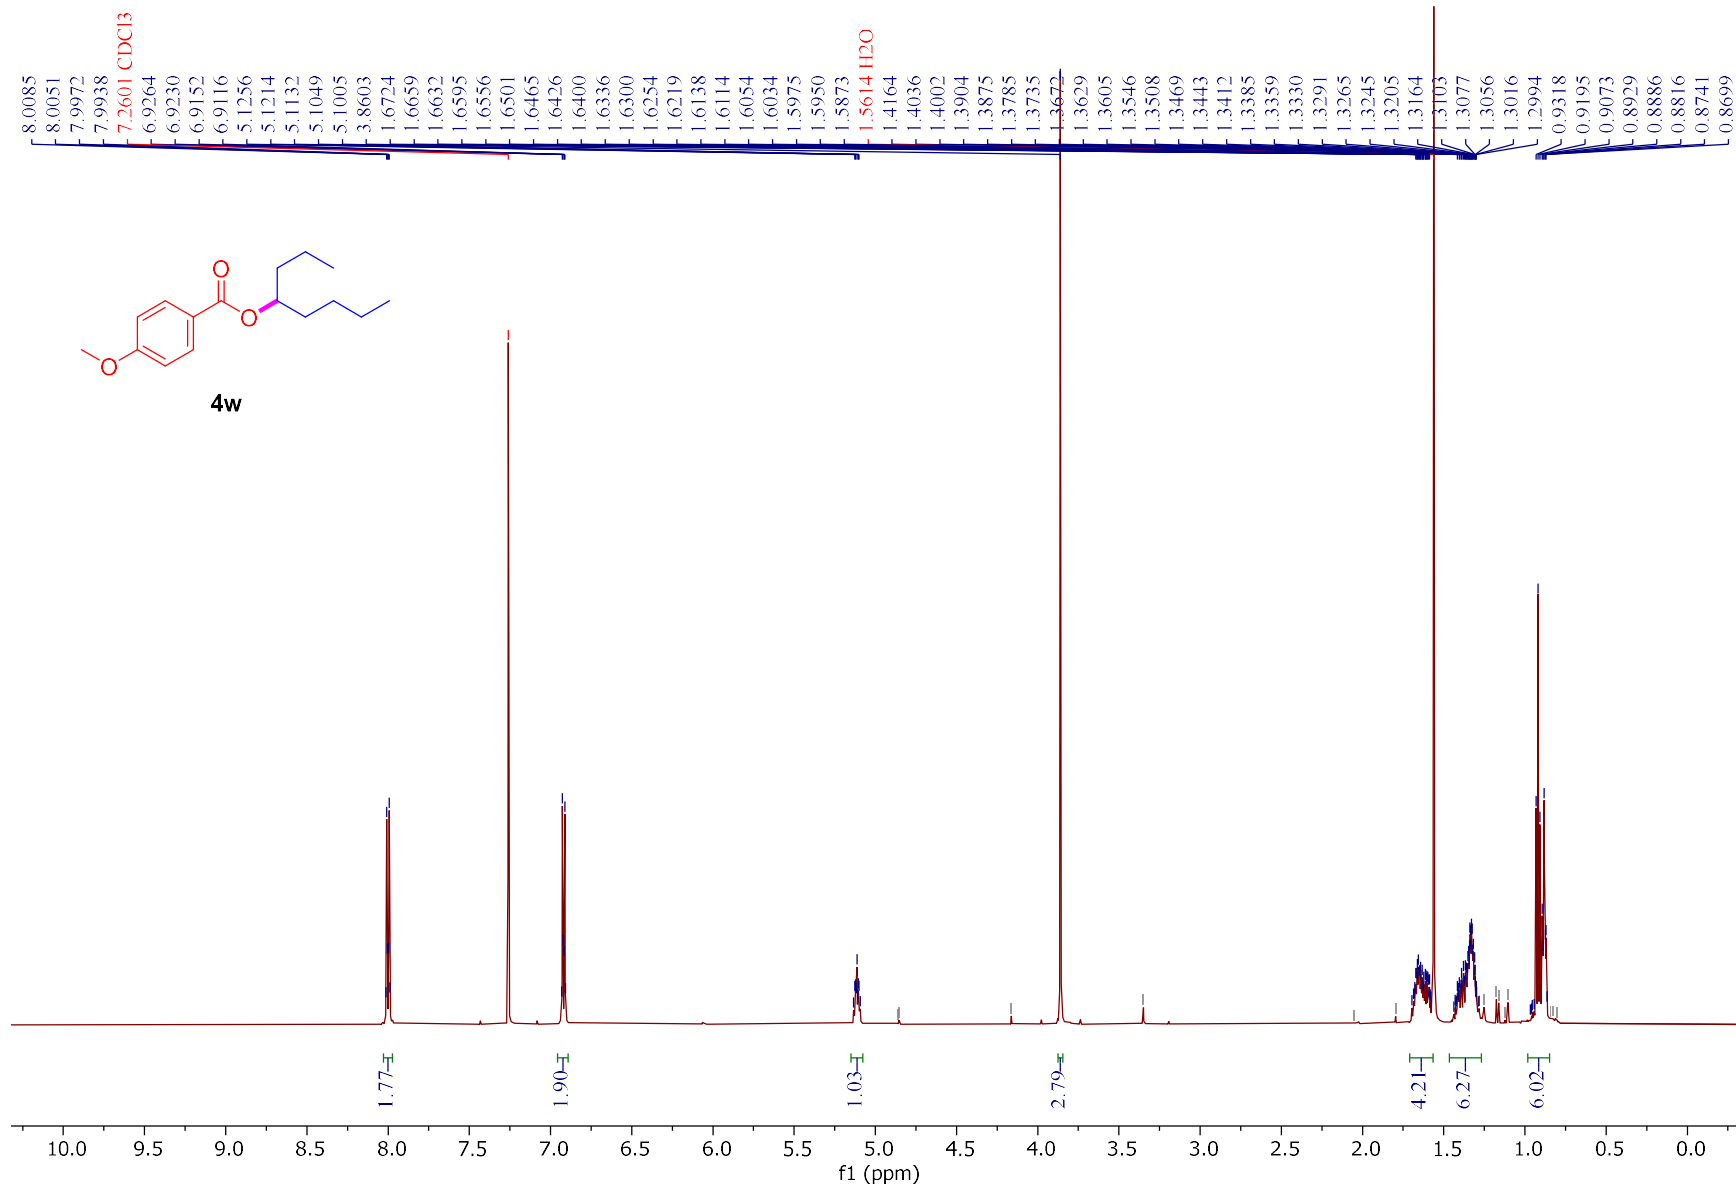

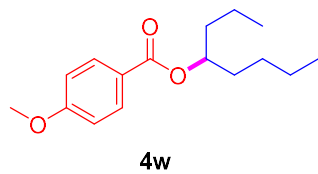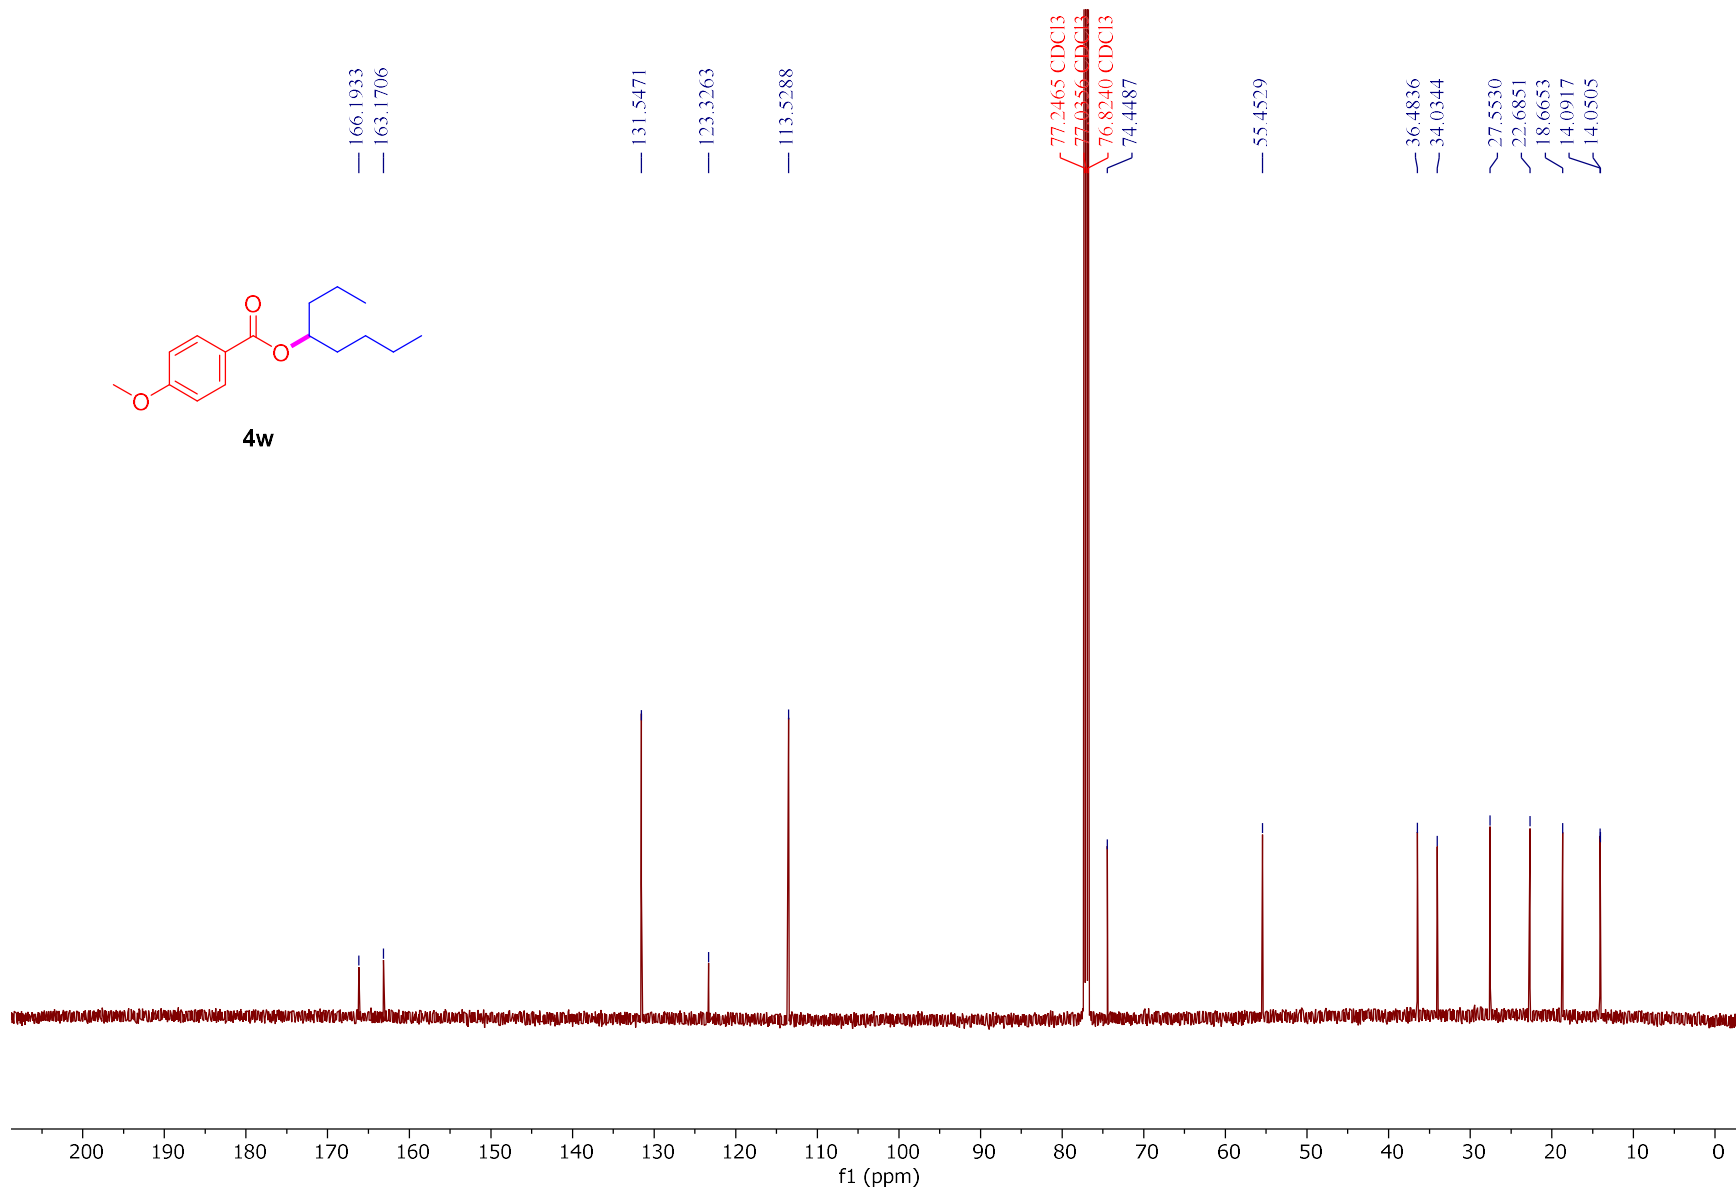

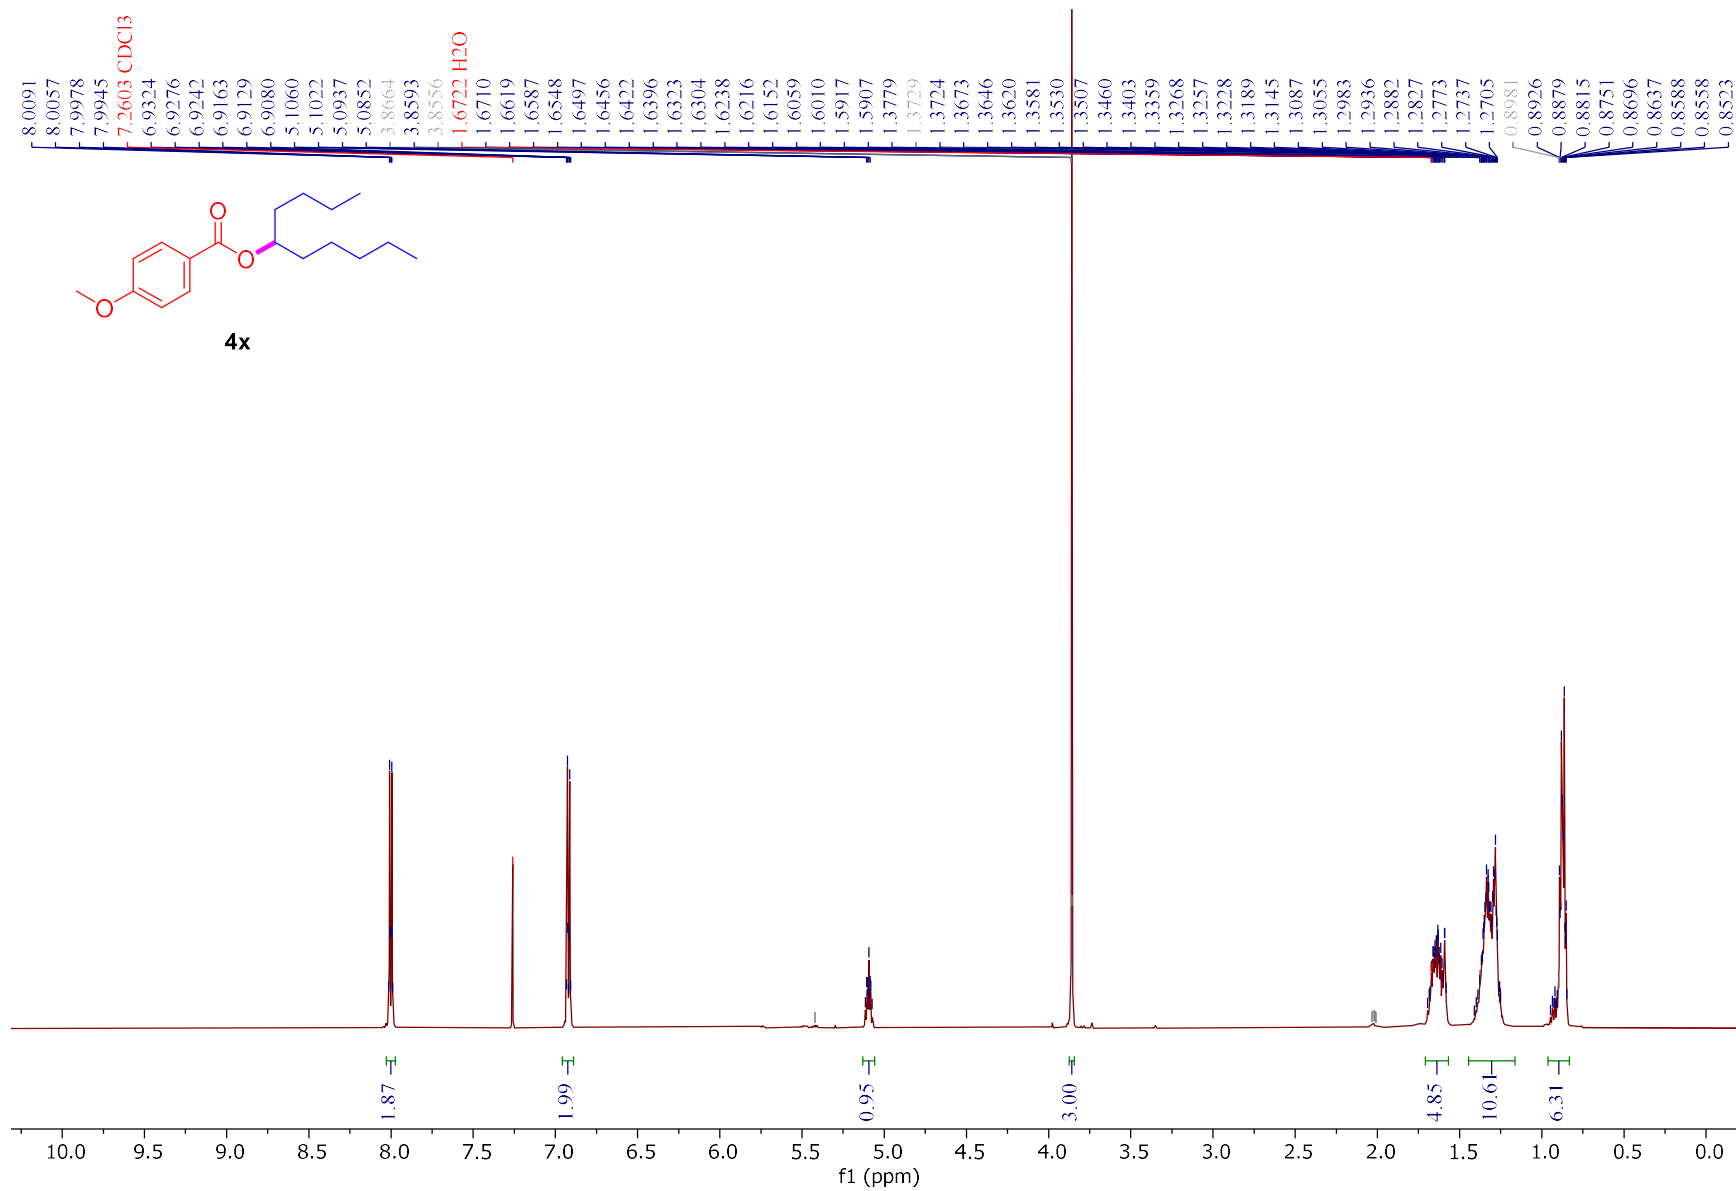

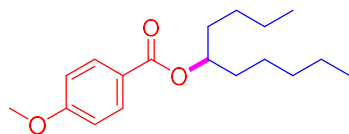

4x

— 166.1865  
— 163.1675

— 131.5438

— 123.3469

— 113.5289

77.2499  
77.0377  
76.8263  
74.7039

— 55.4452

34.2459  
33.9918  
31.7960  
27.5558  
25.0532  
22.6857  
22.5689

— 14.0481

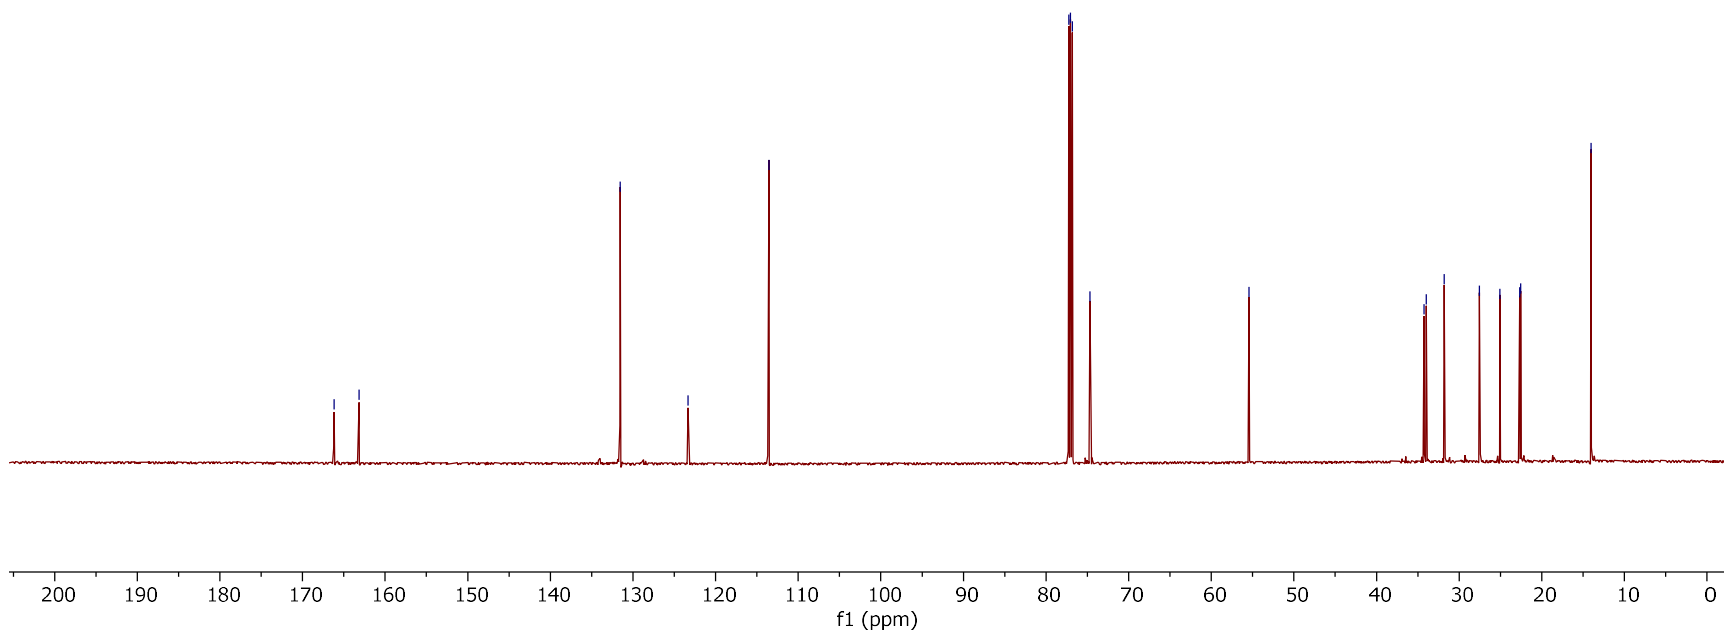

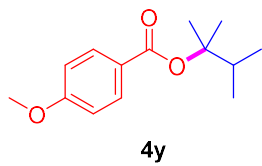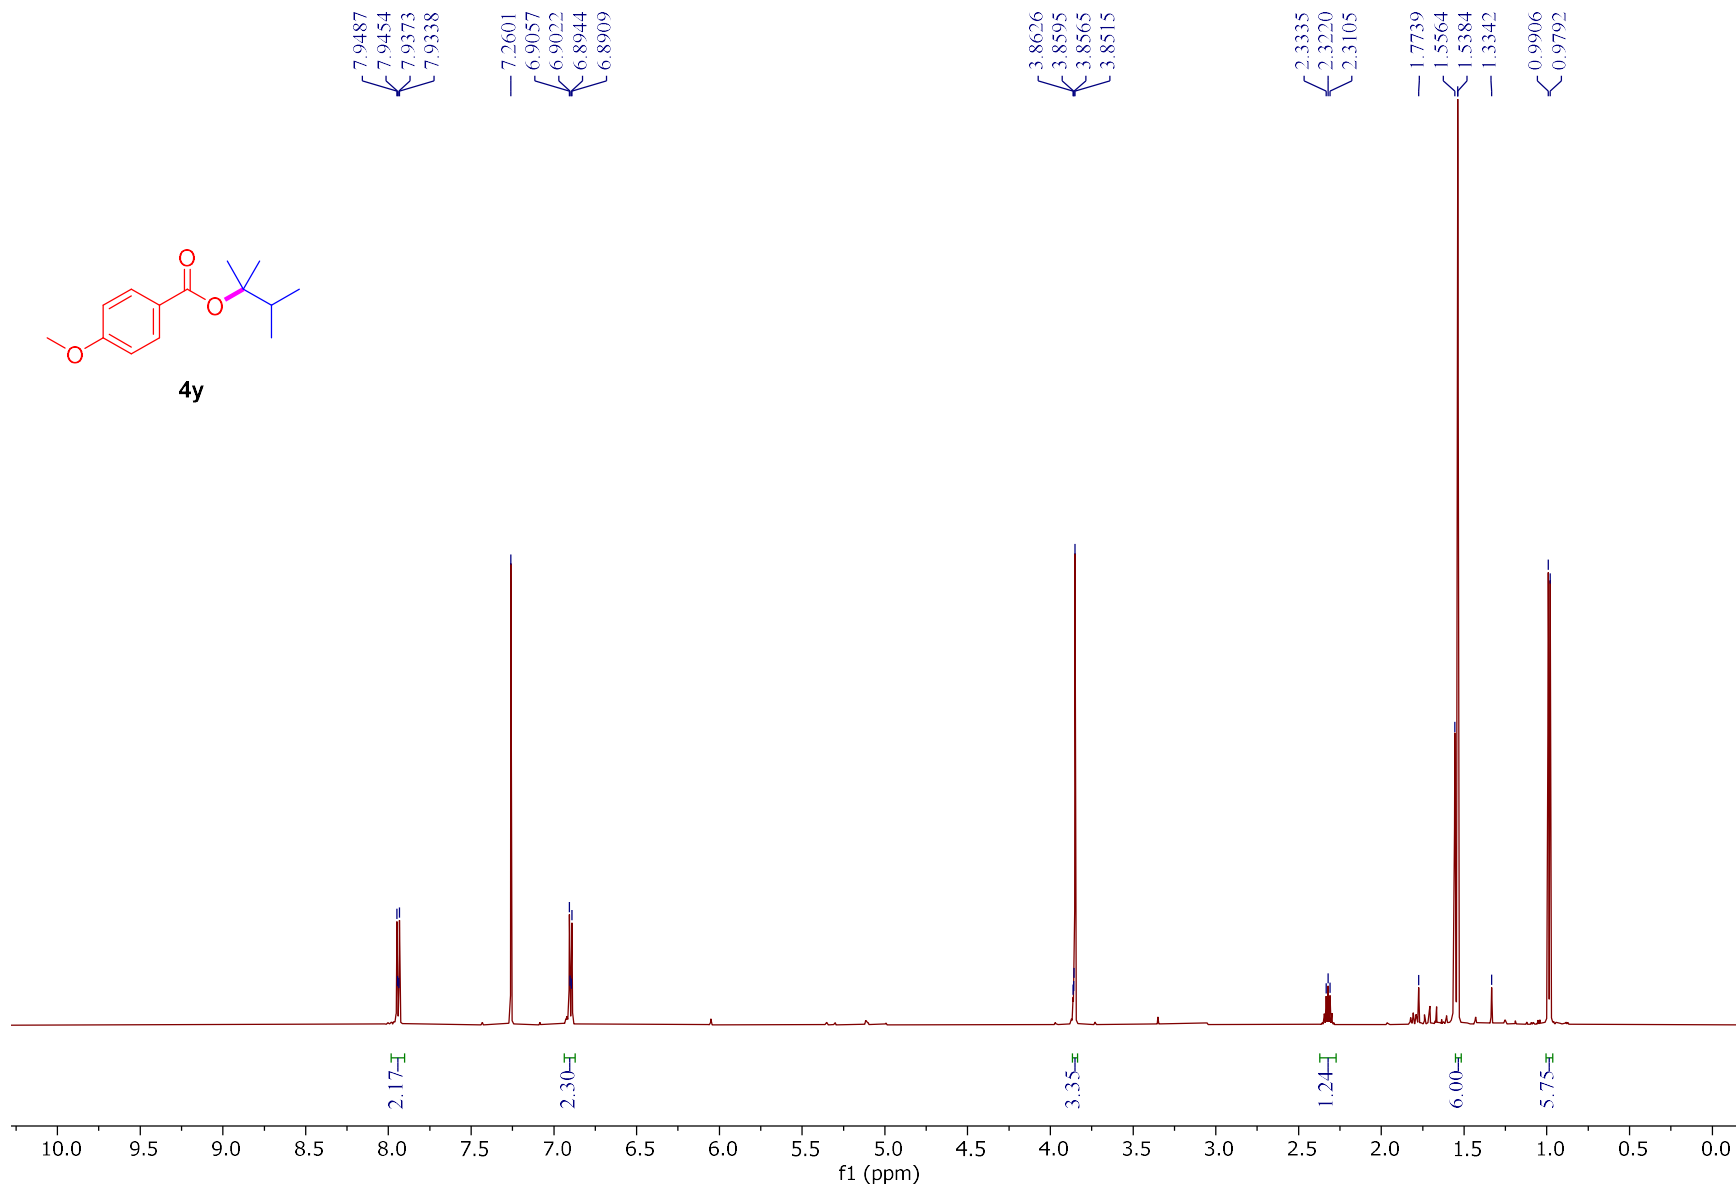



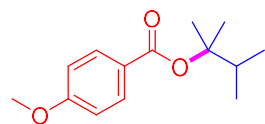

4y

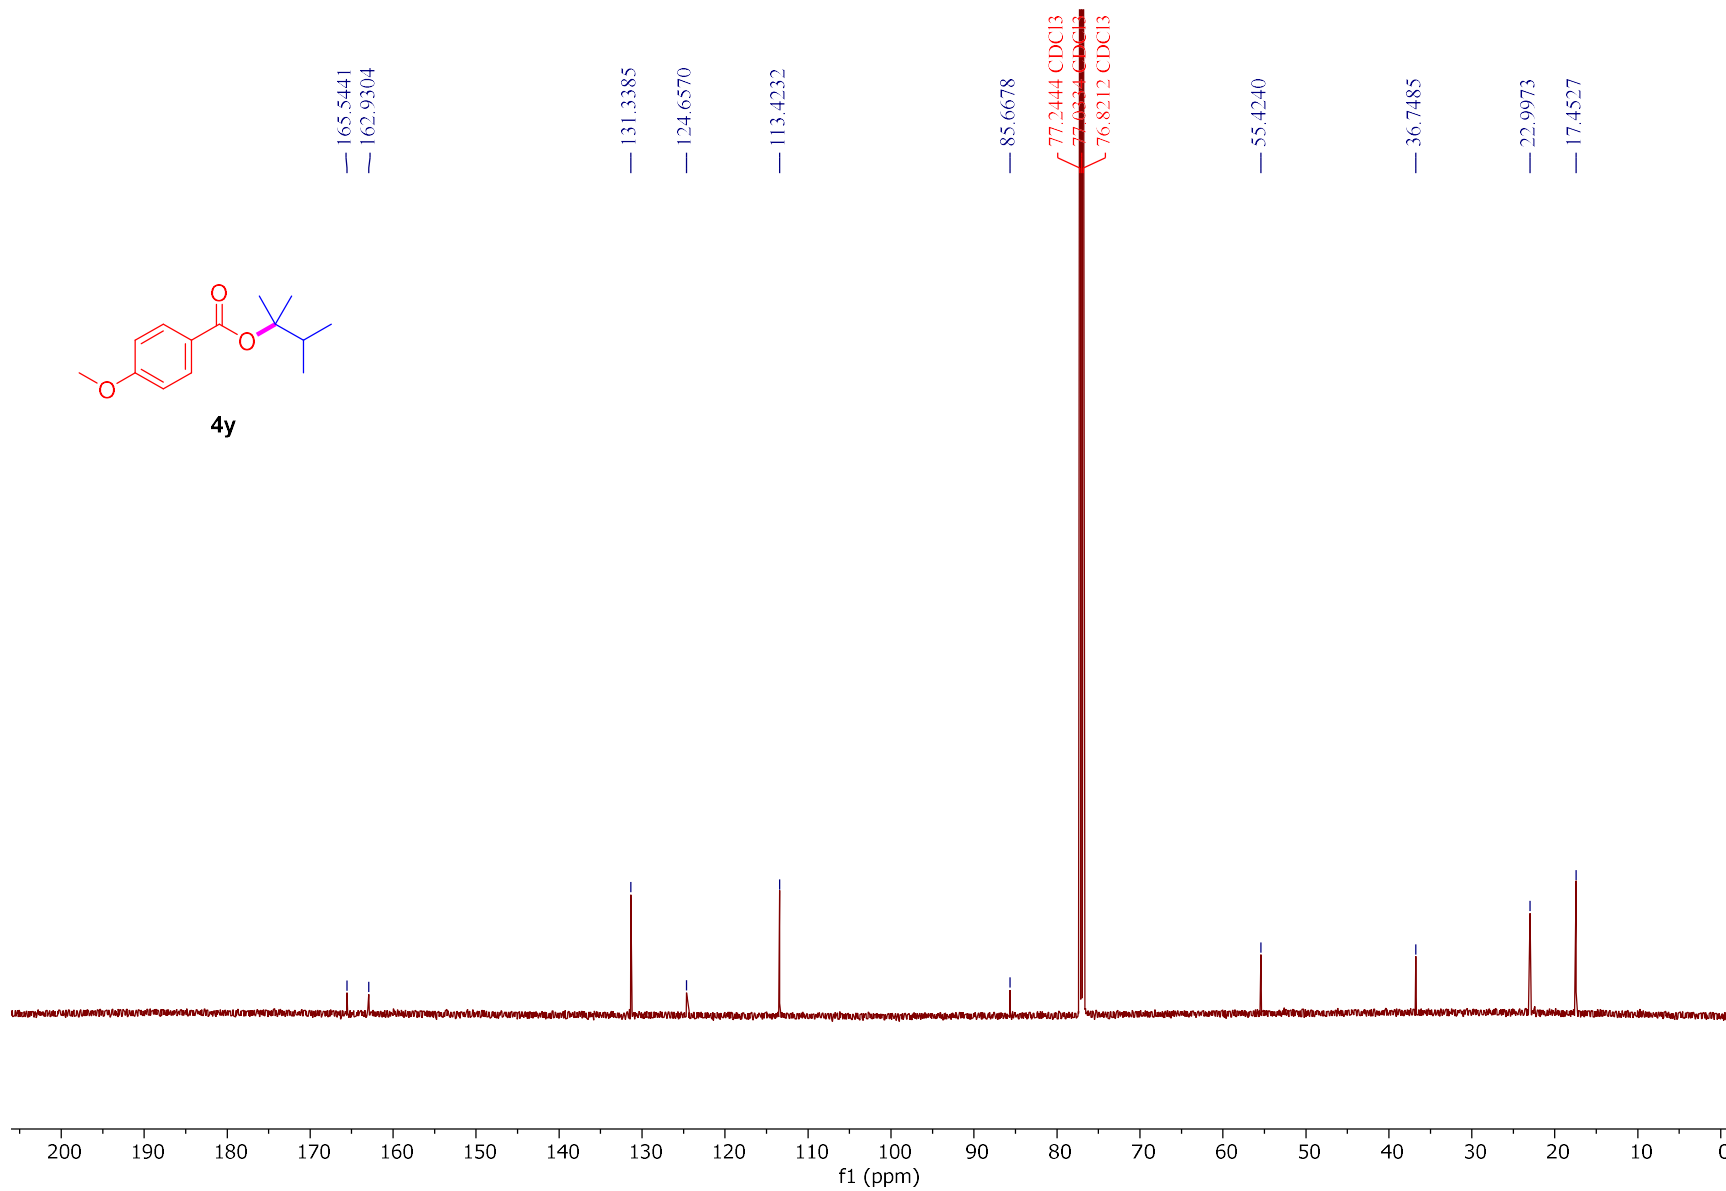

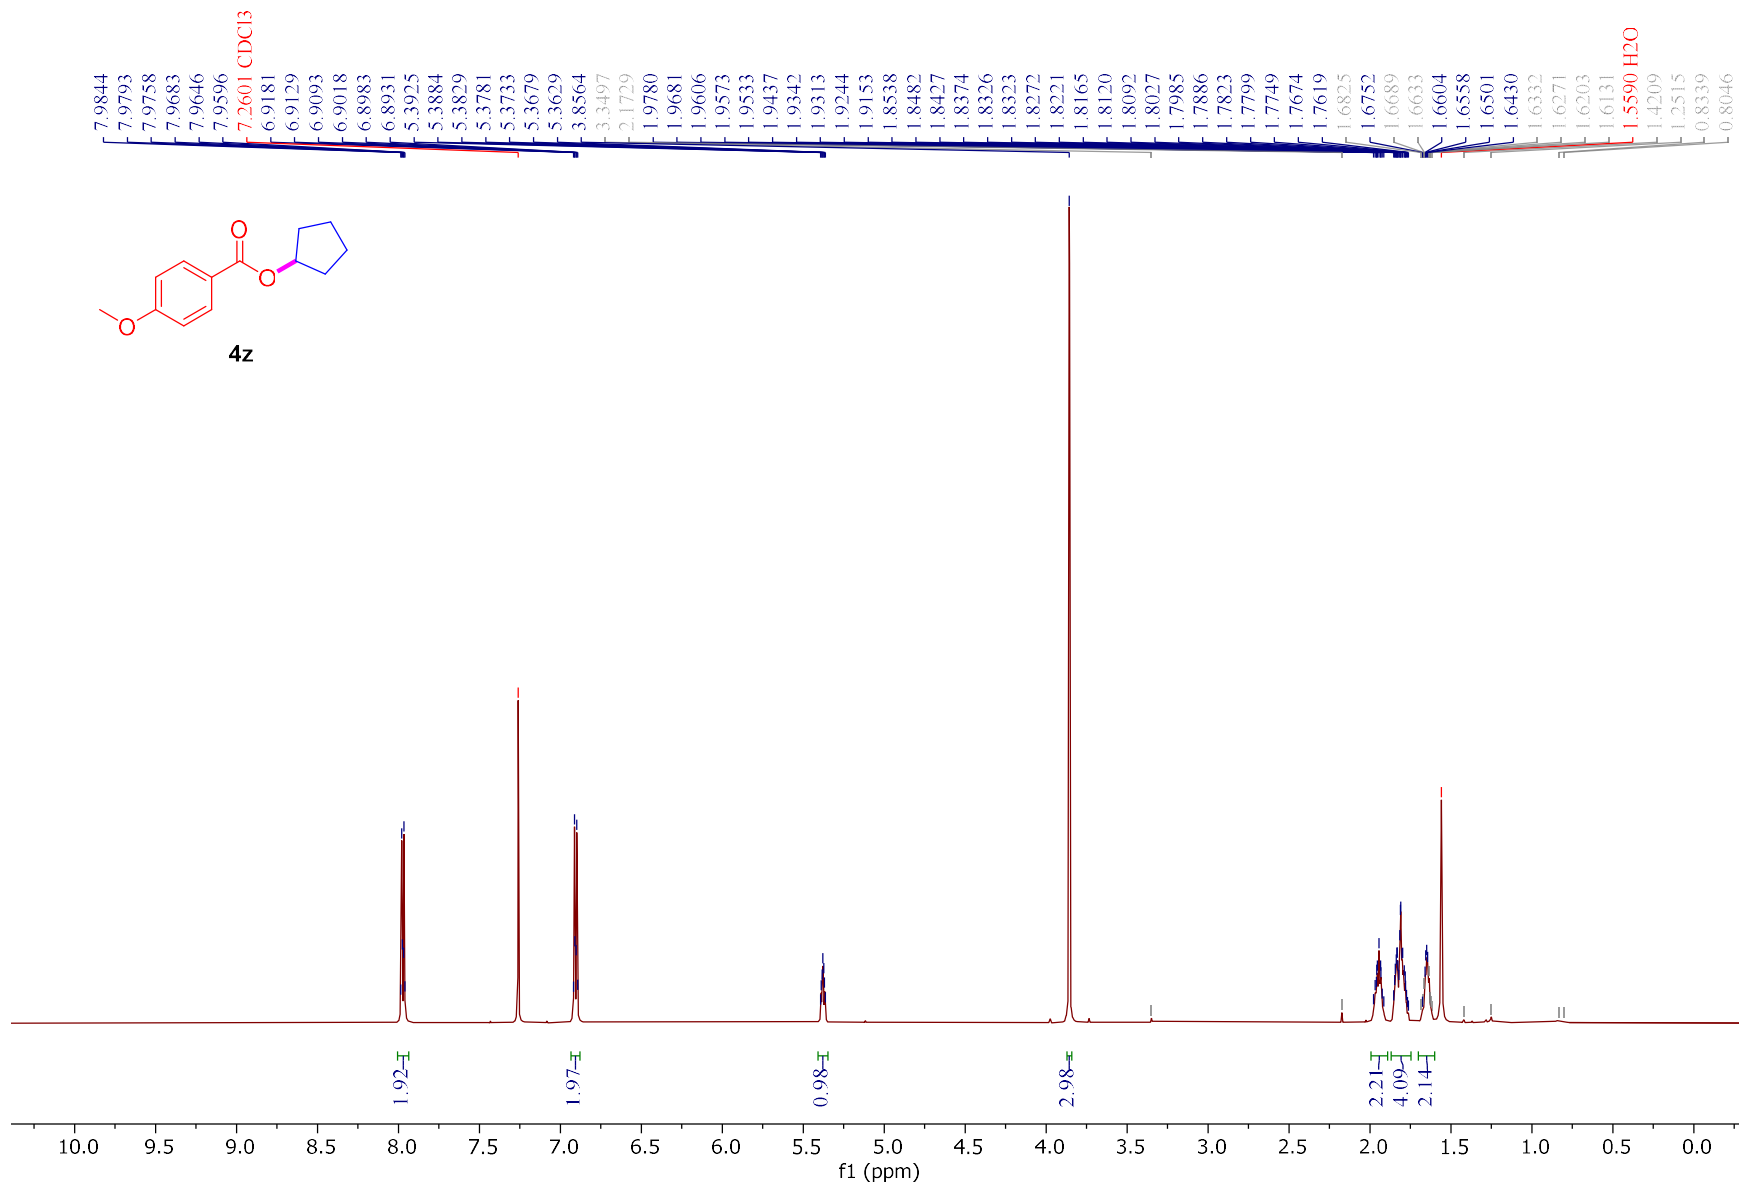

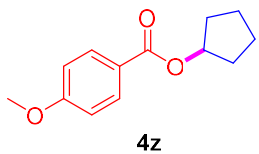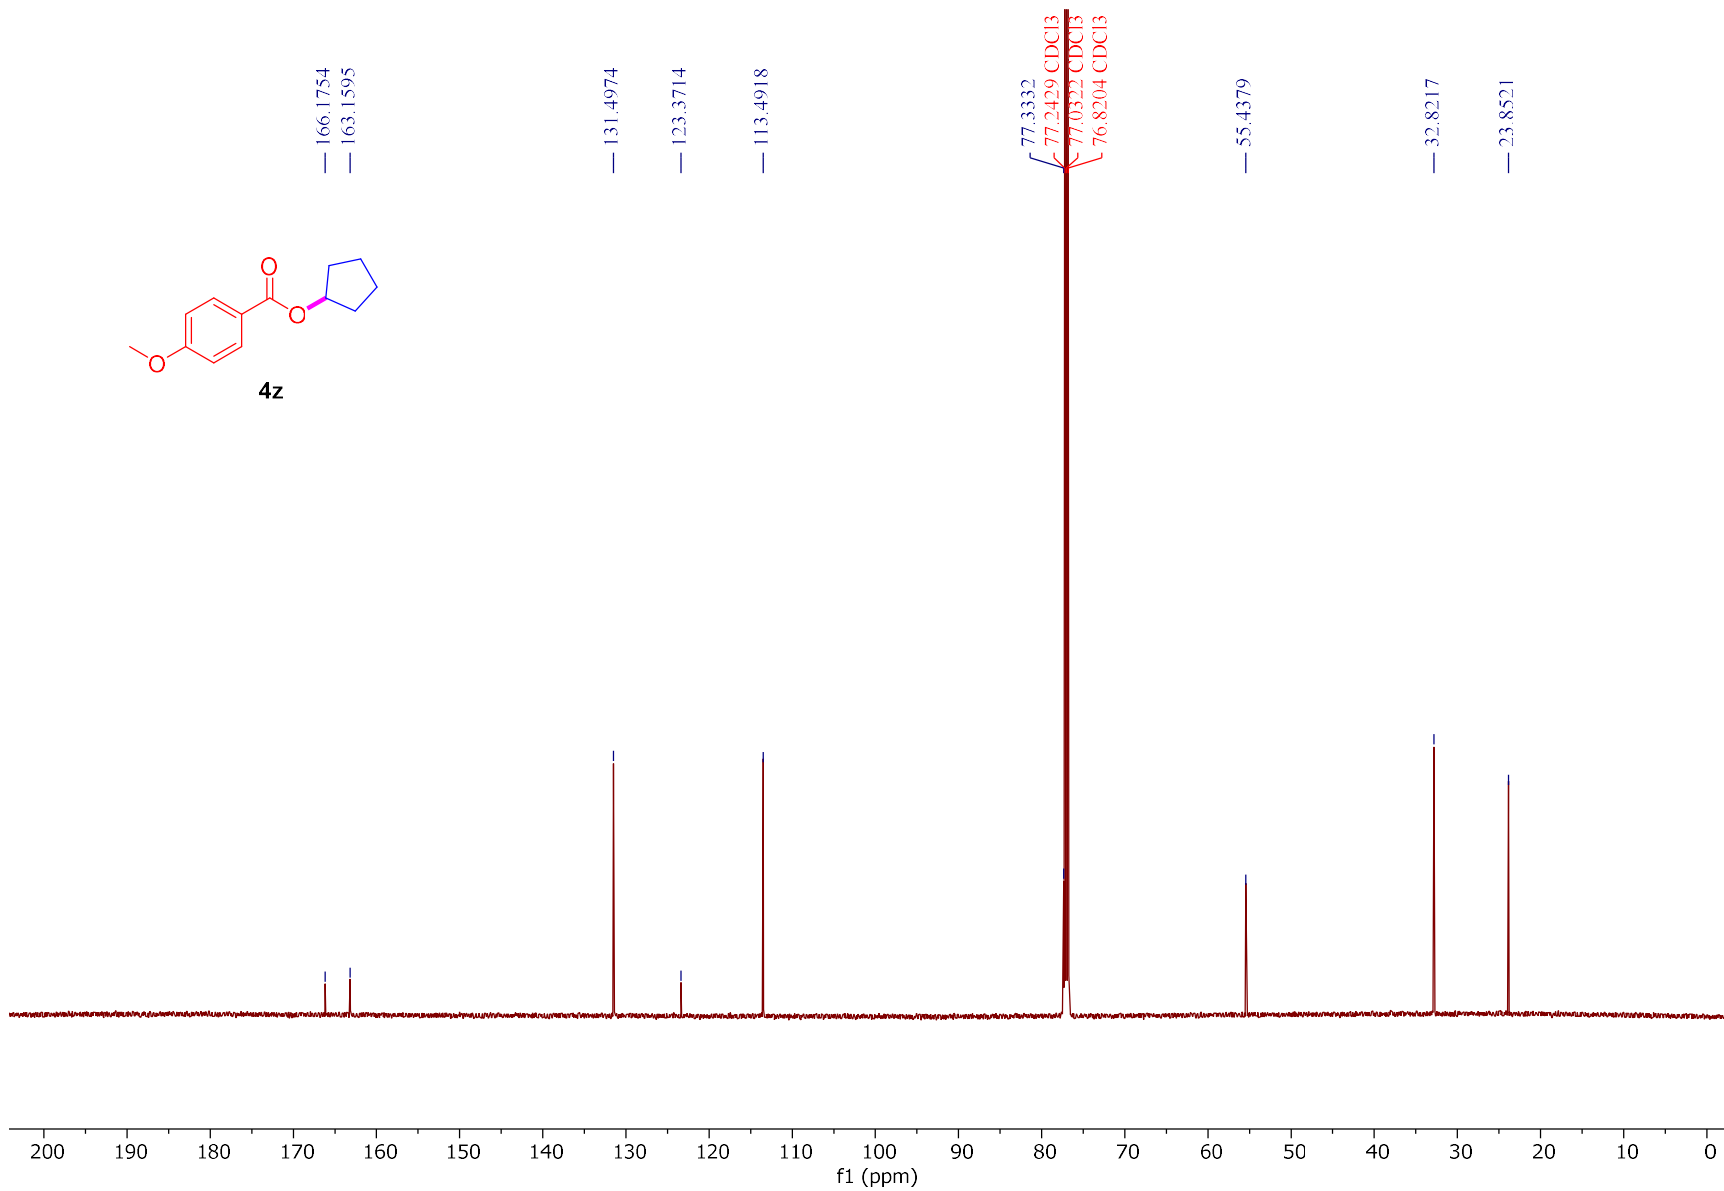

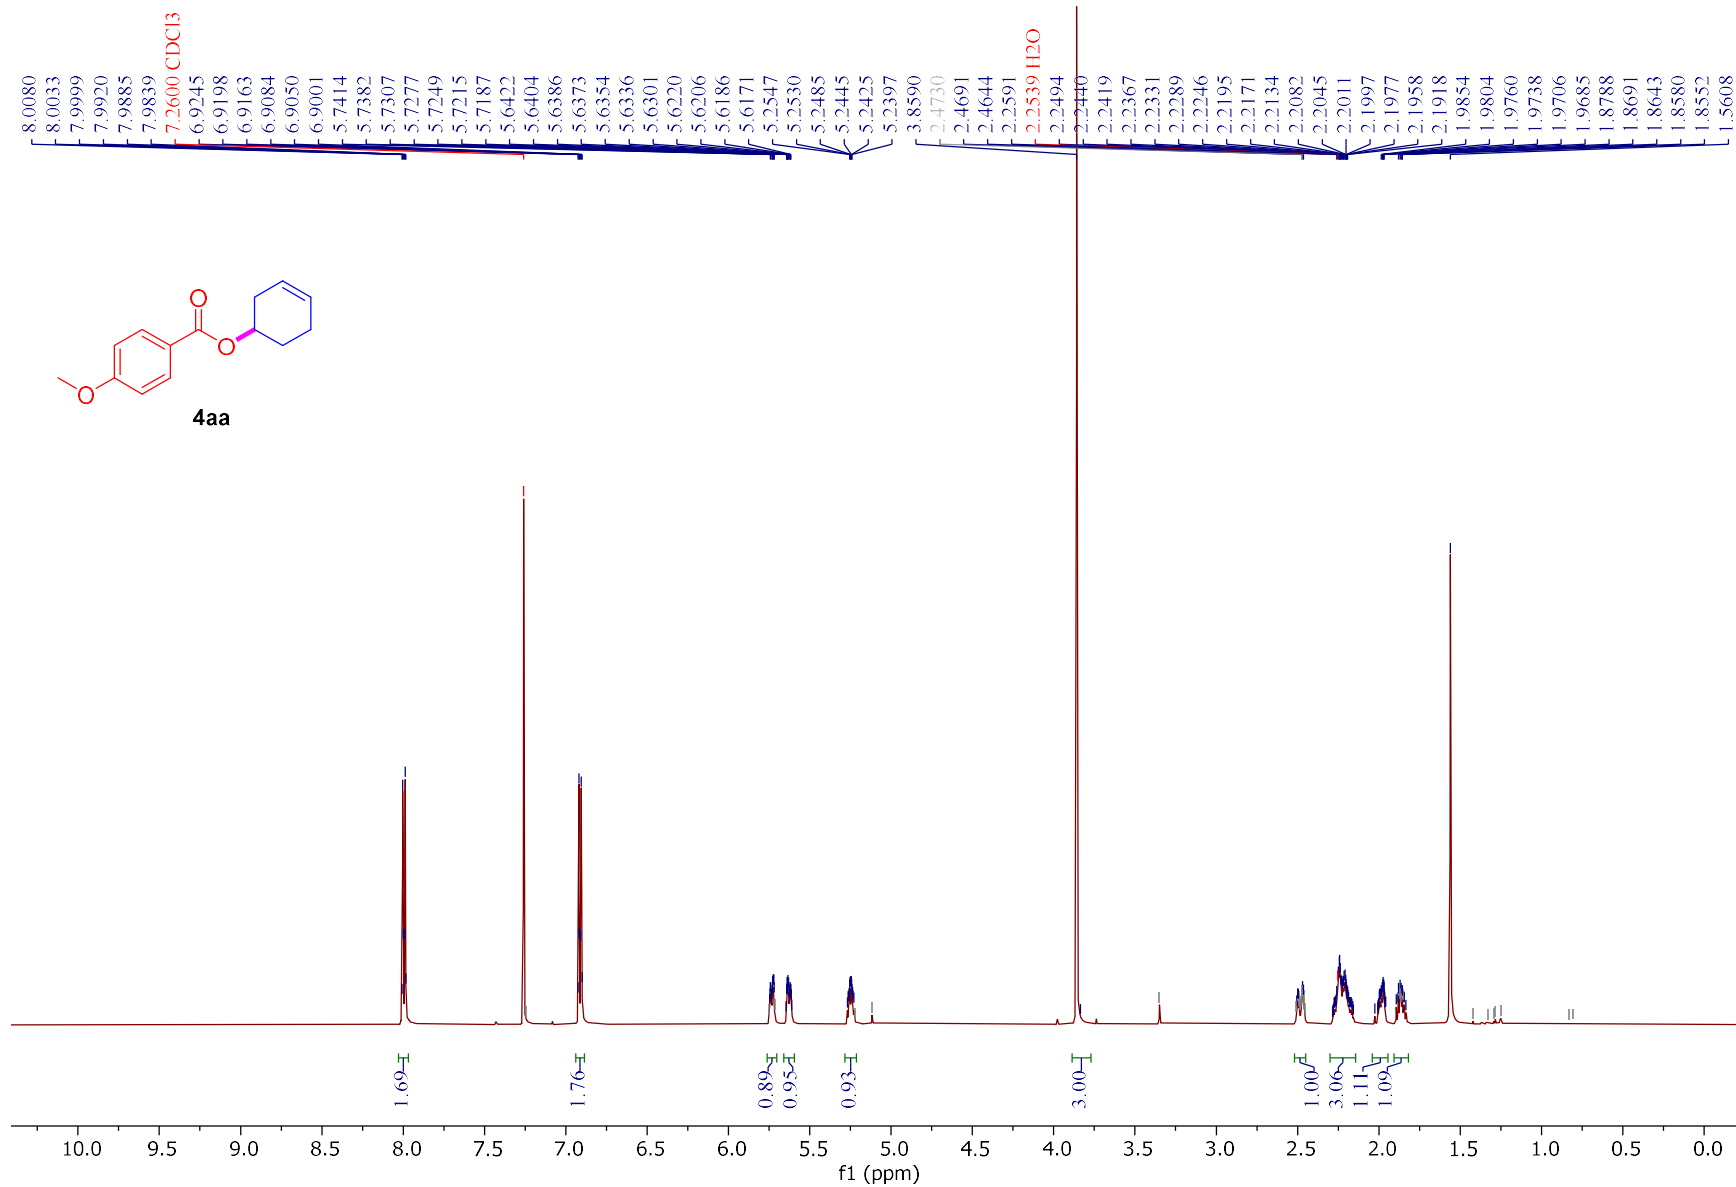

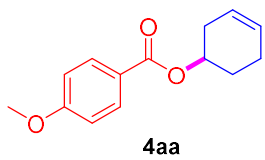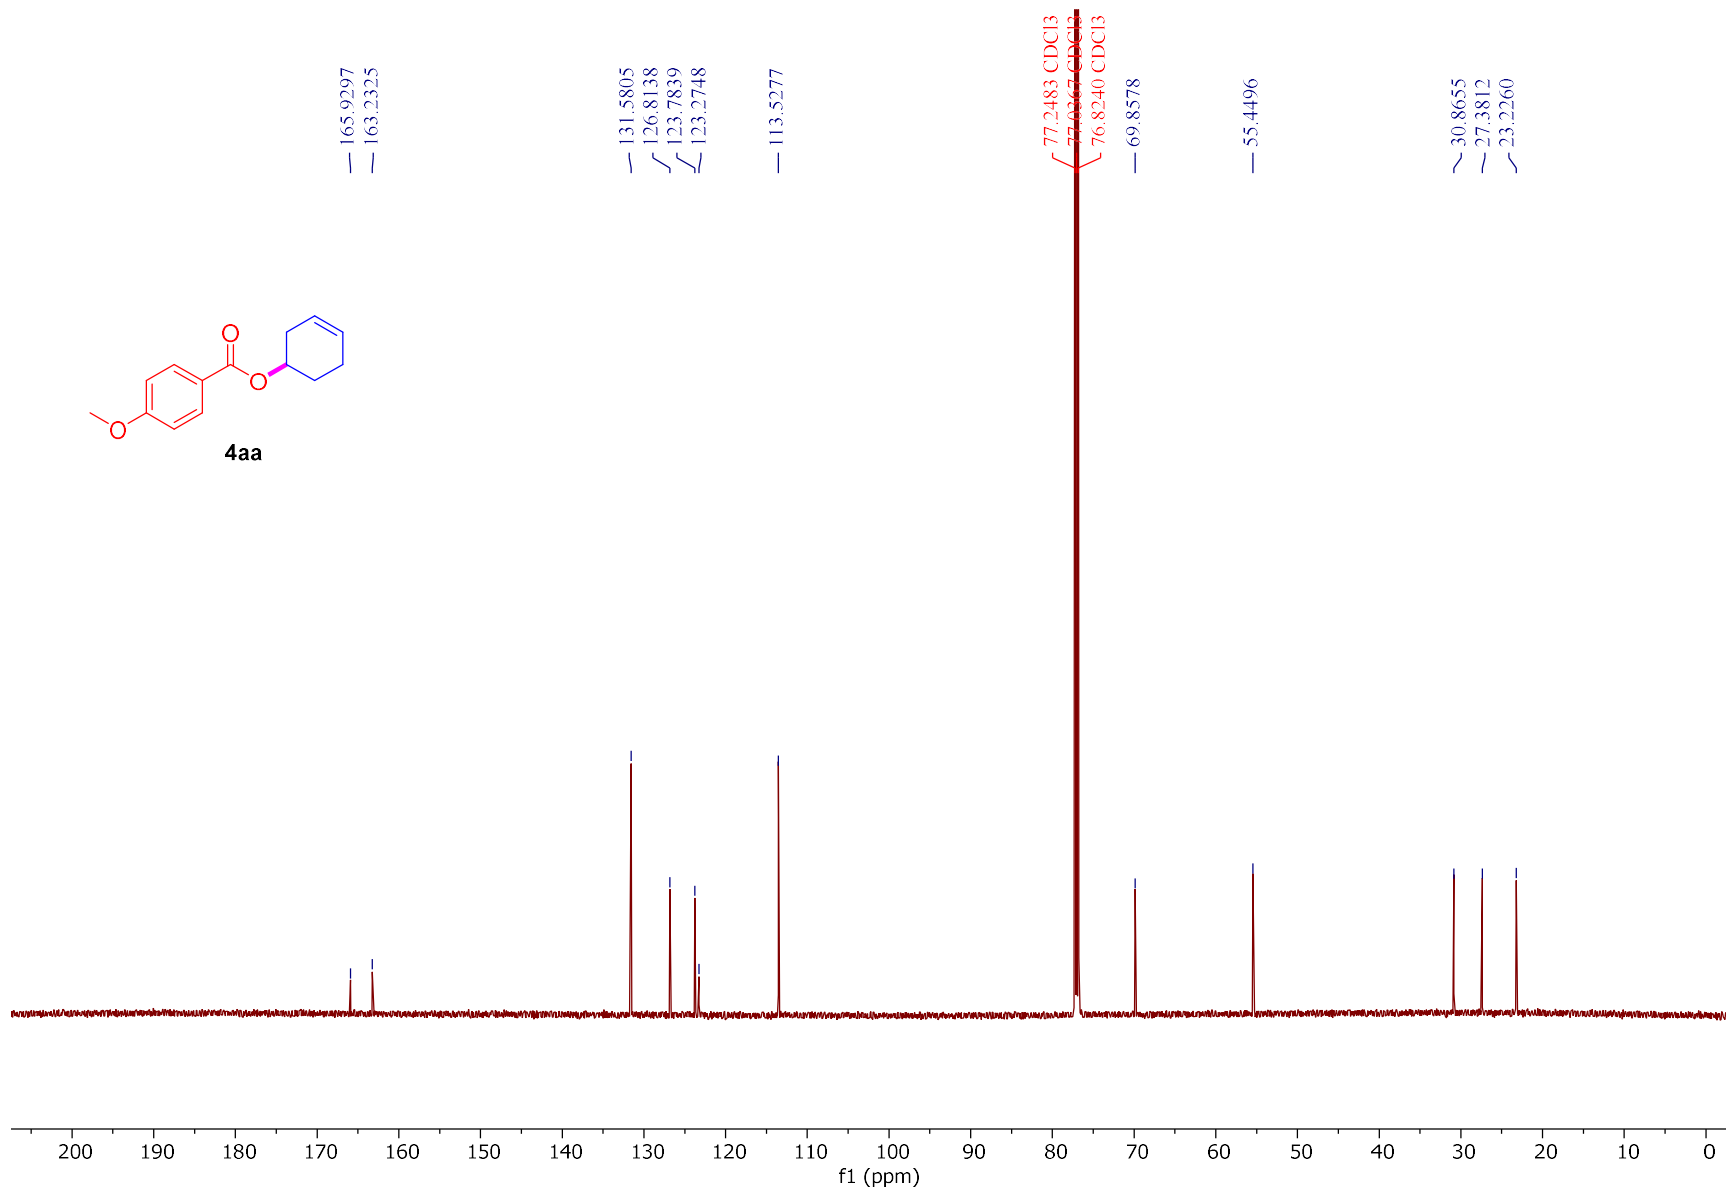

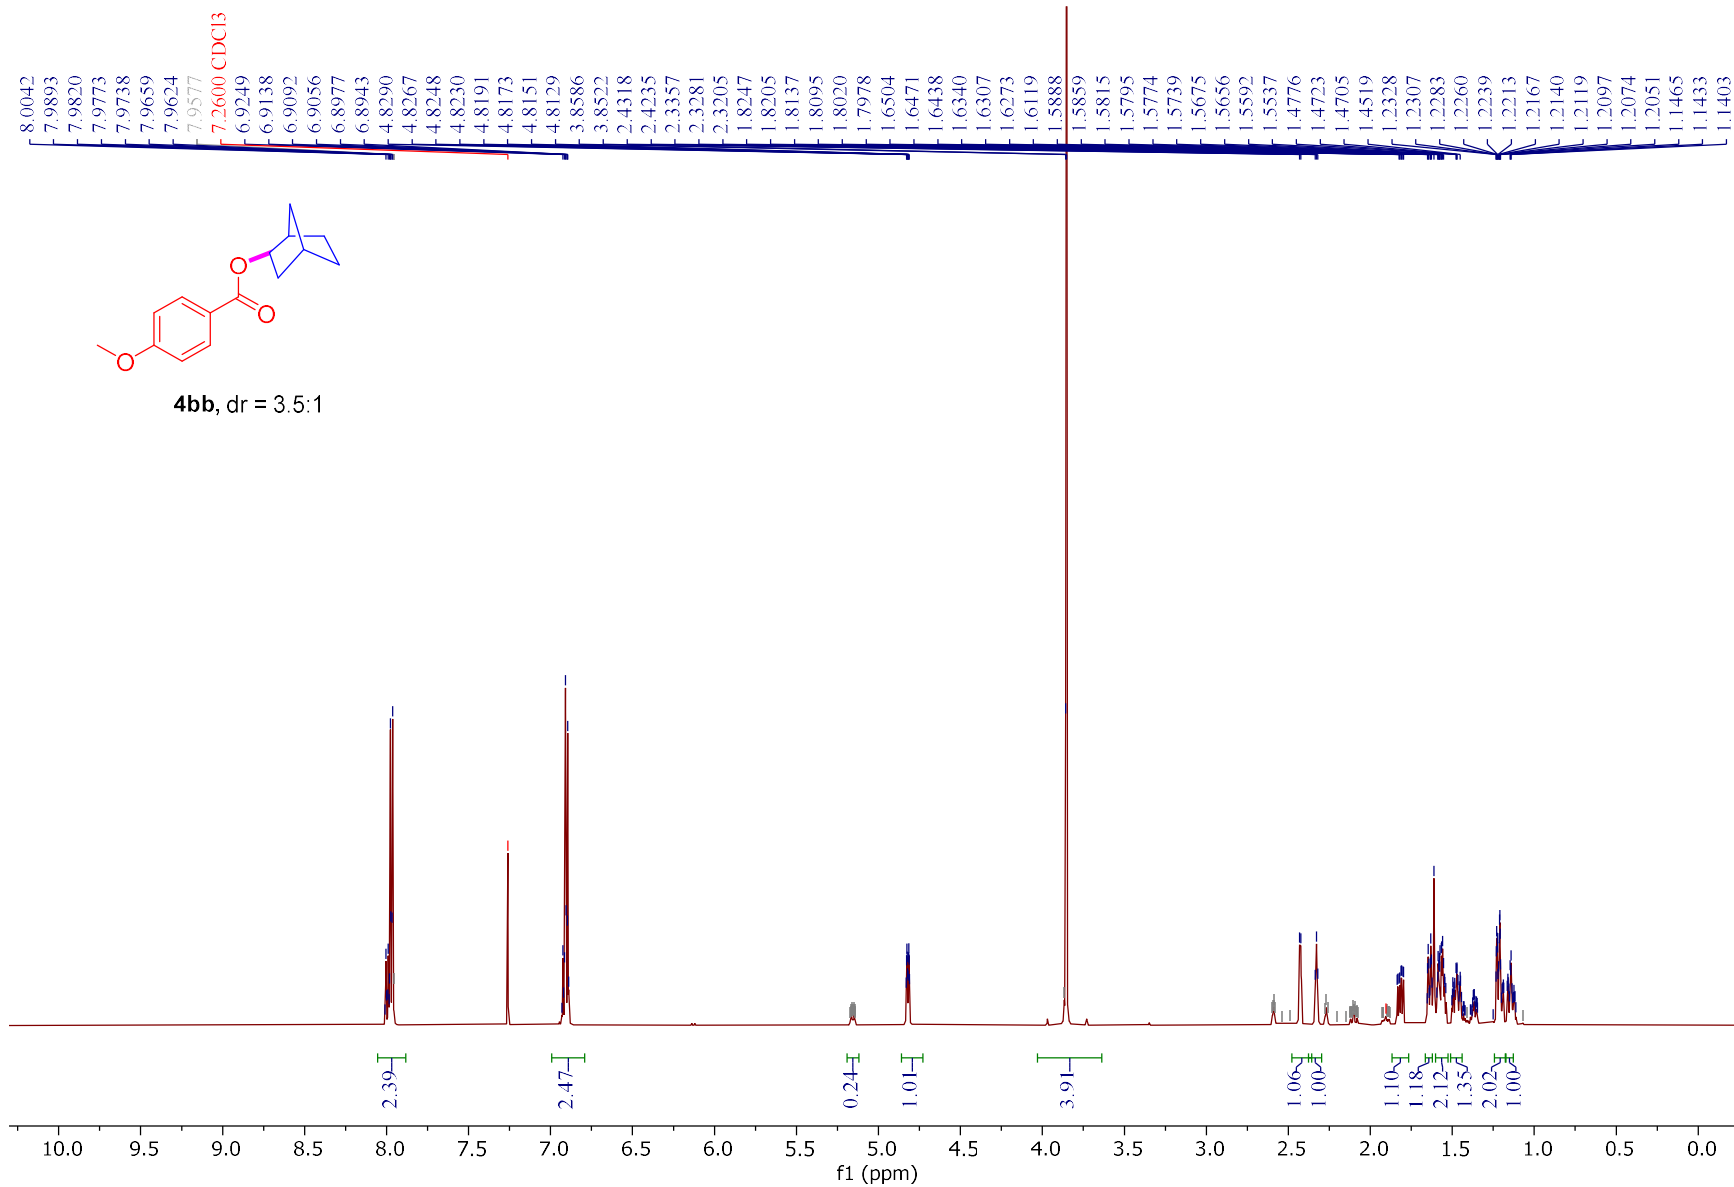

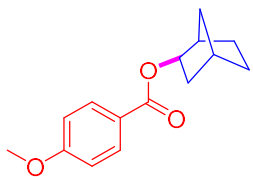

**4bb**, dr = 3.5:1

166.0130  
163.1712

131.4833

123.3431

113.4953

77.8113  
77.2578  
77.0479  
76.8348

55.4357

41.5895  
39.7118  
35.4532

28.2352  
24.3203

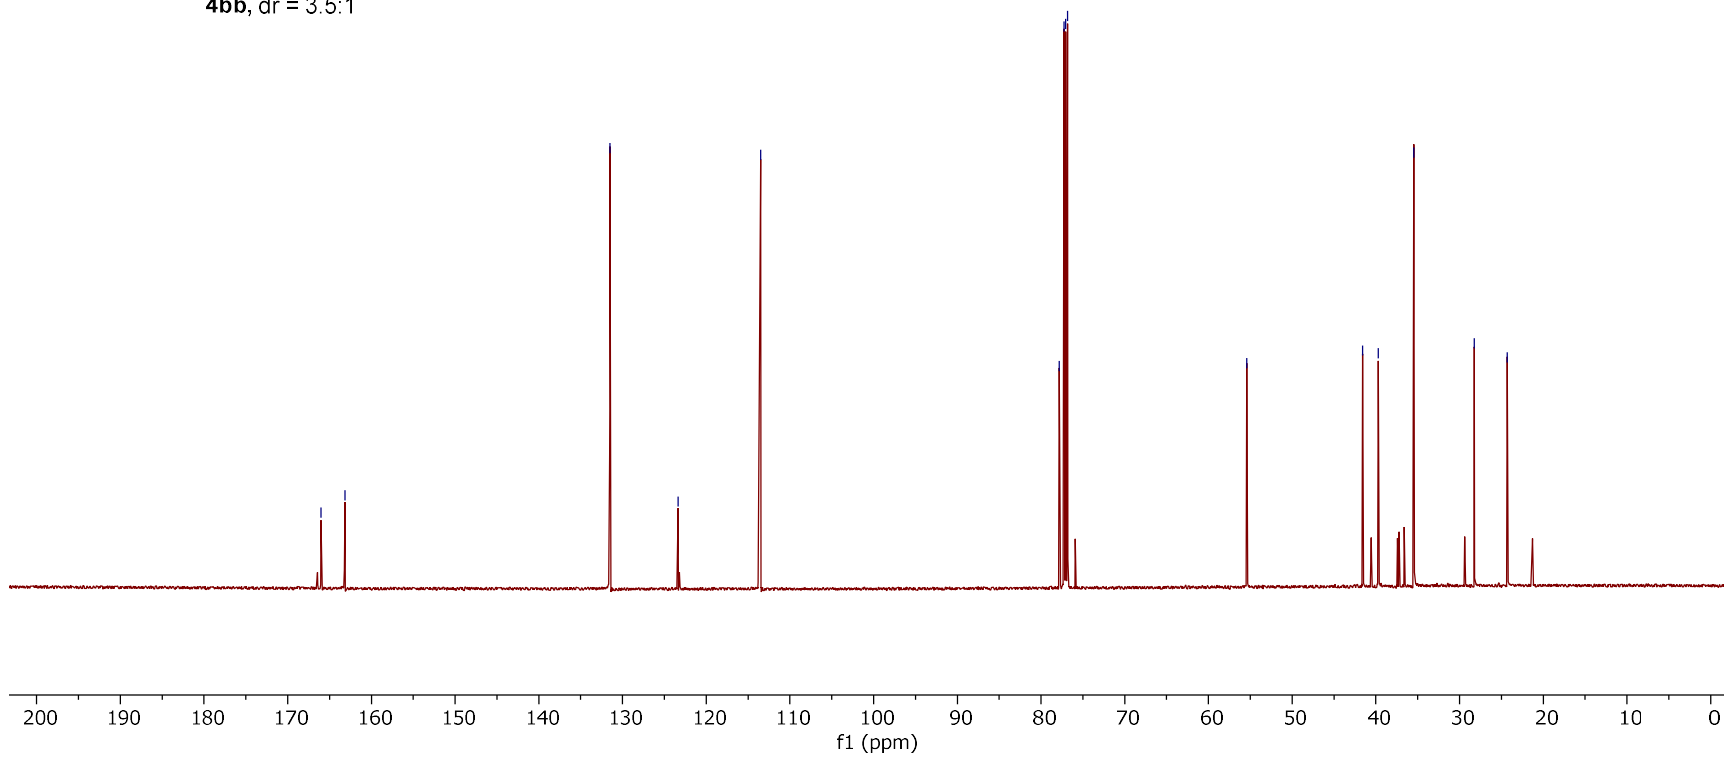

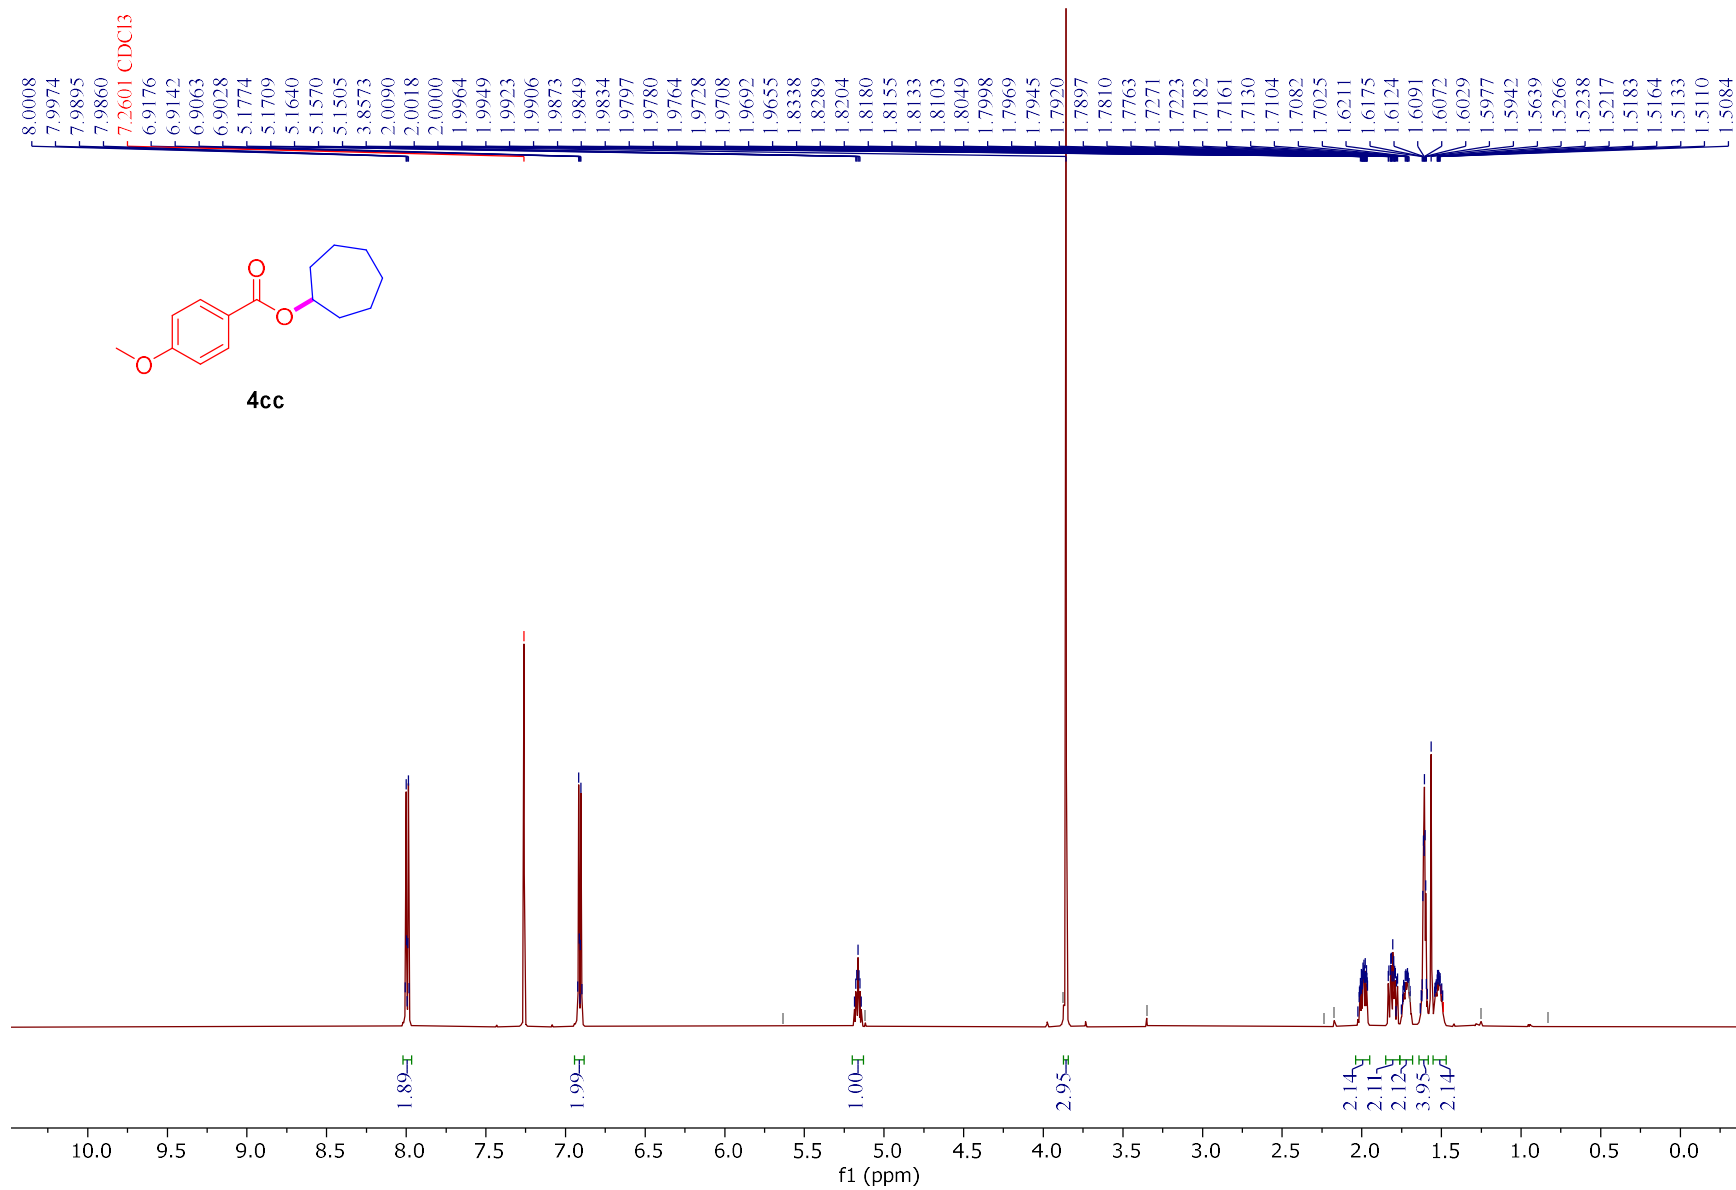



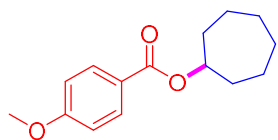

4cc

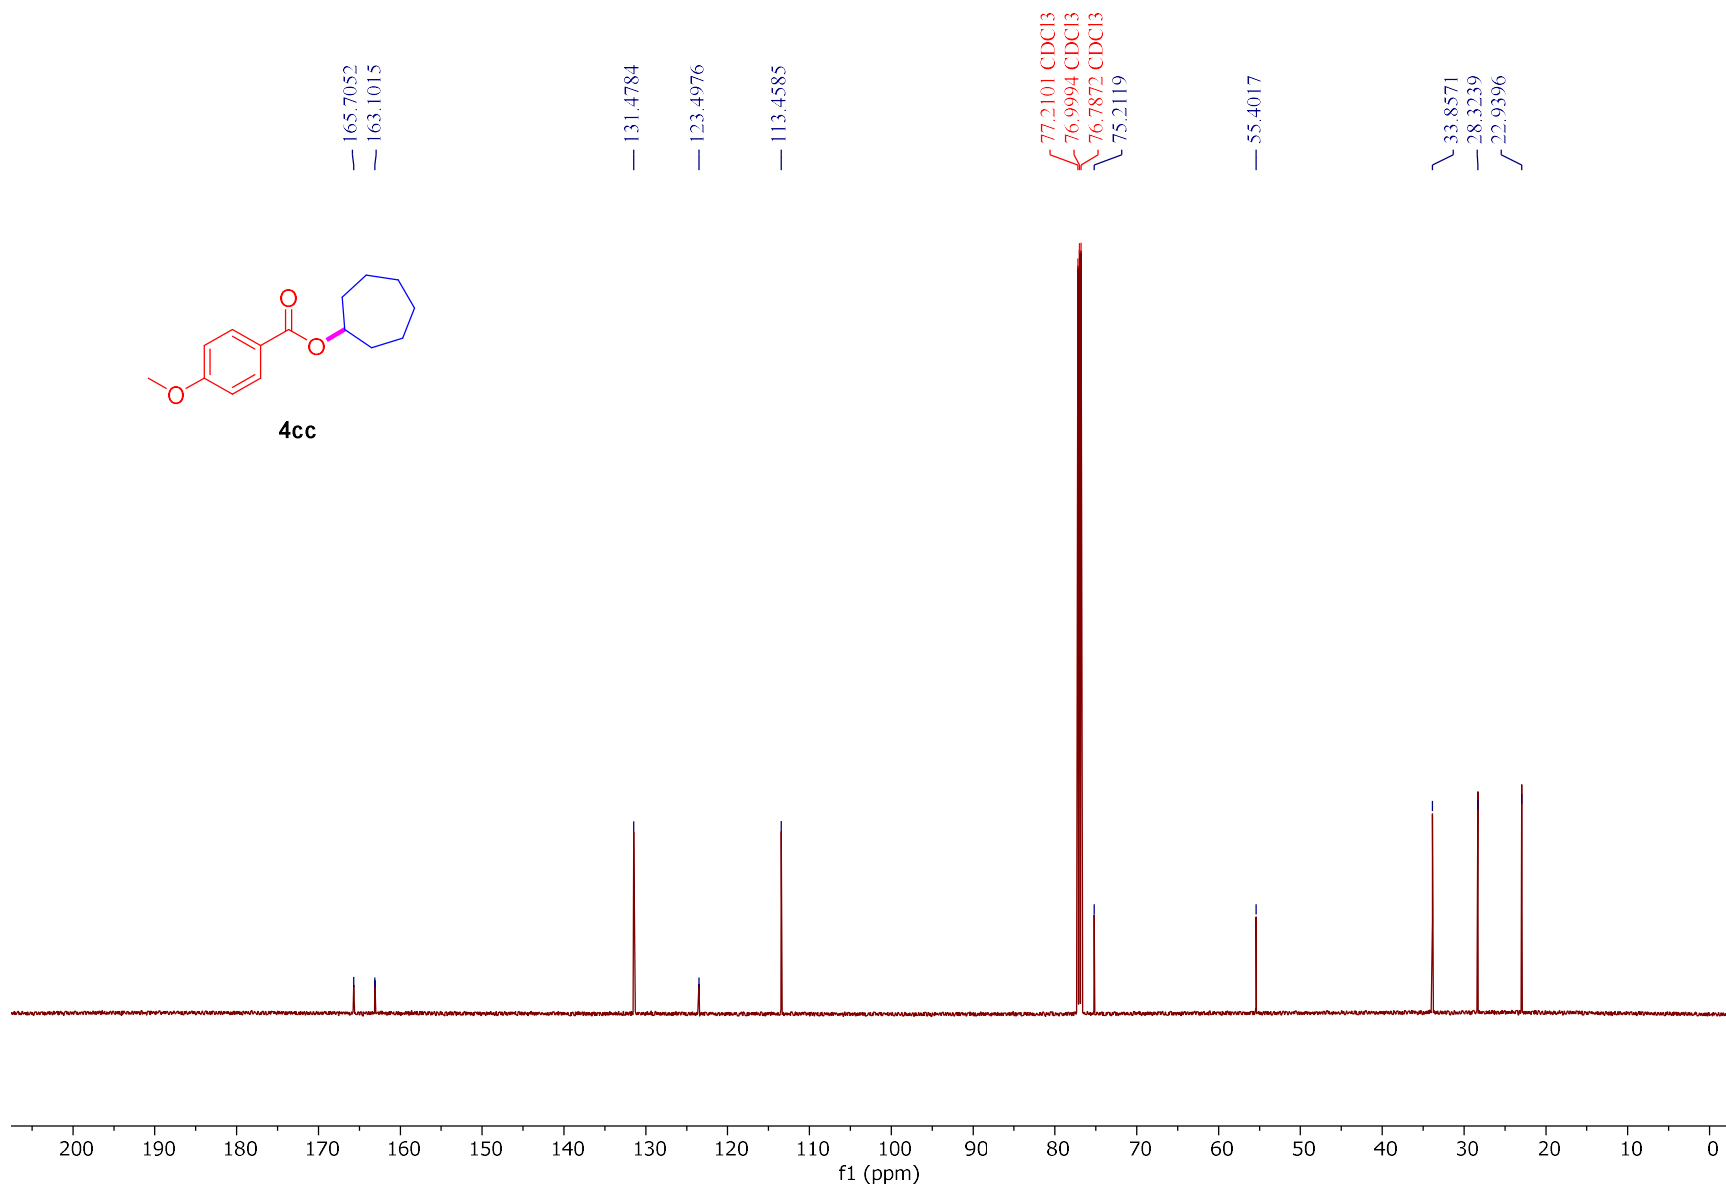

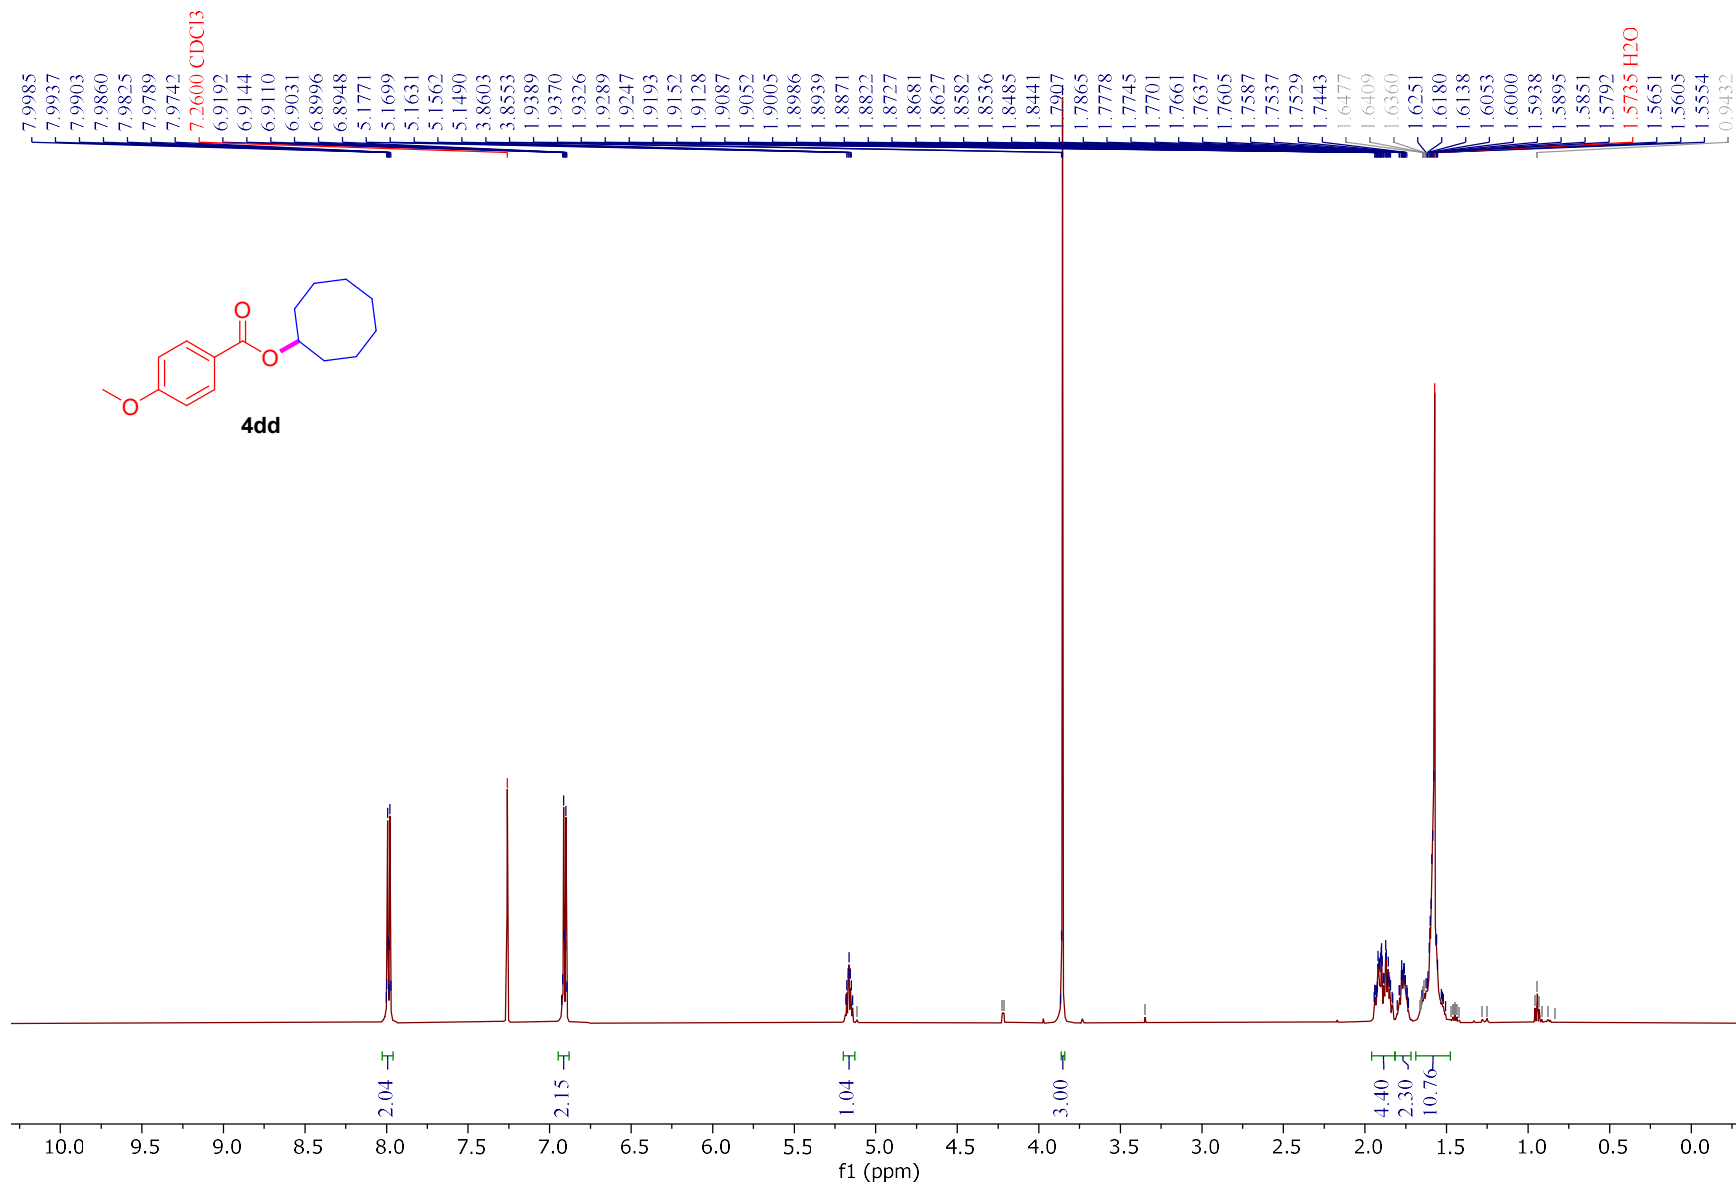

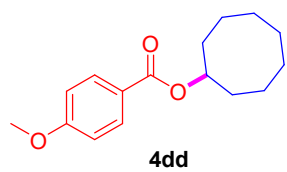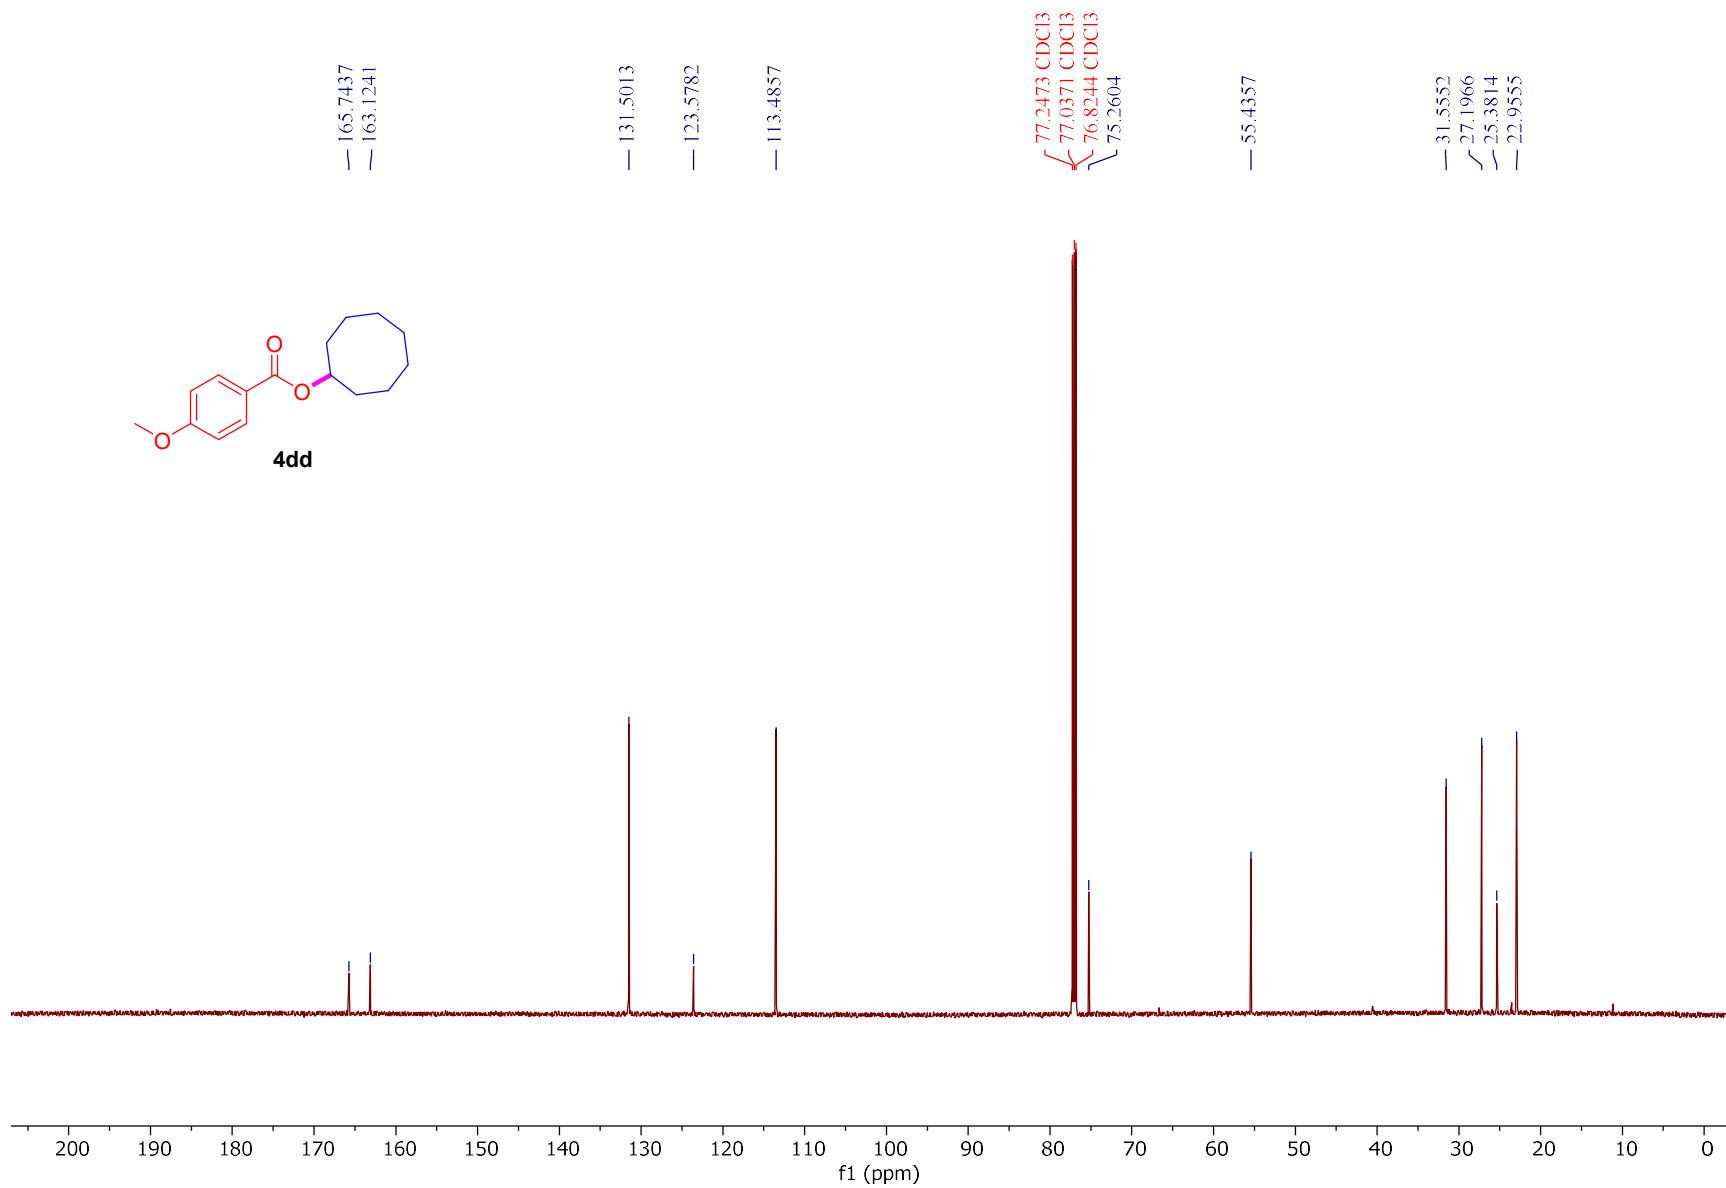

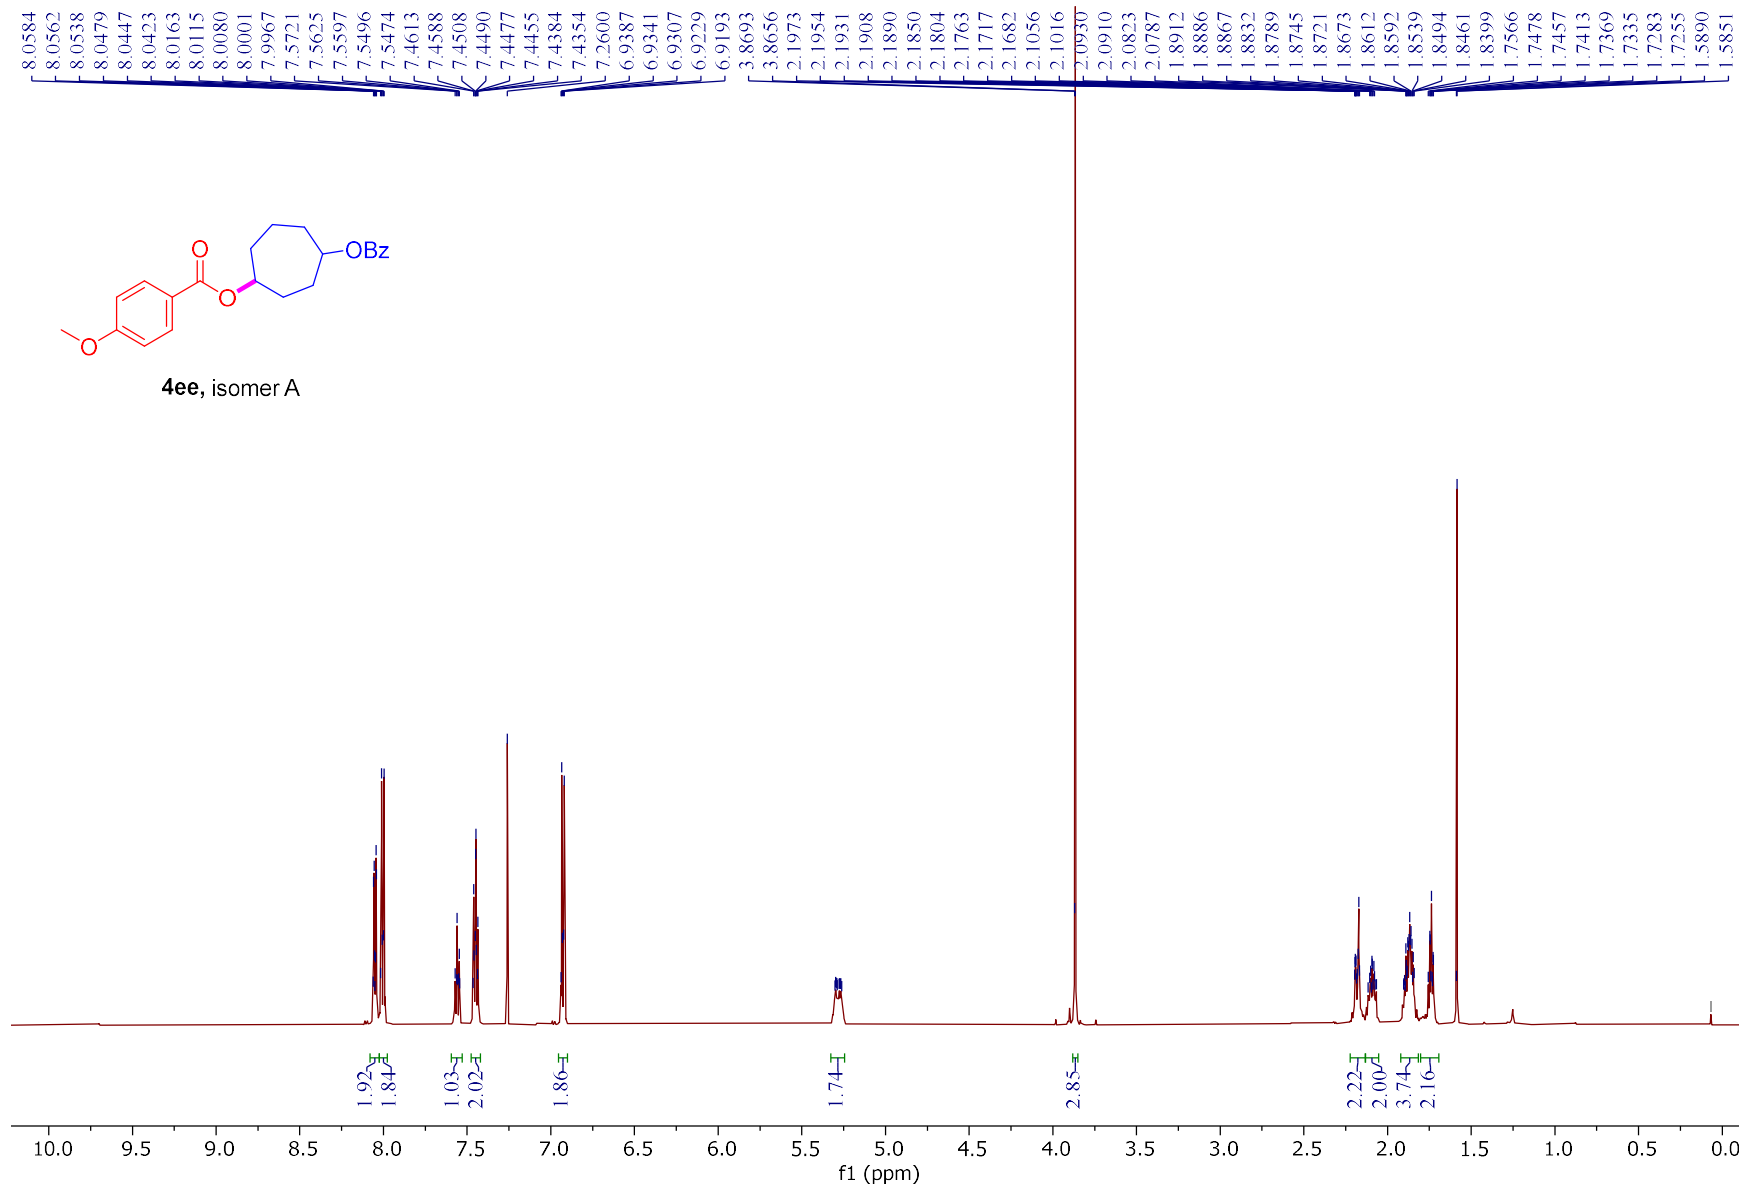

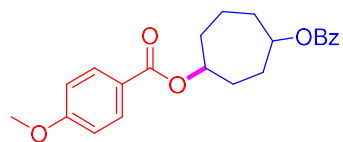

4ee, isomer A

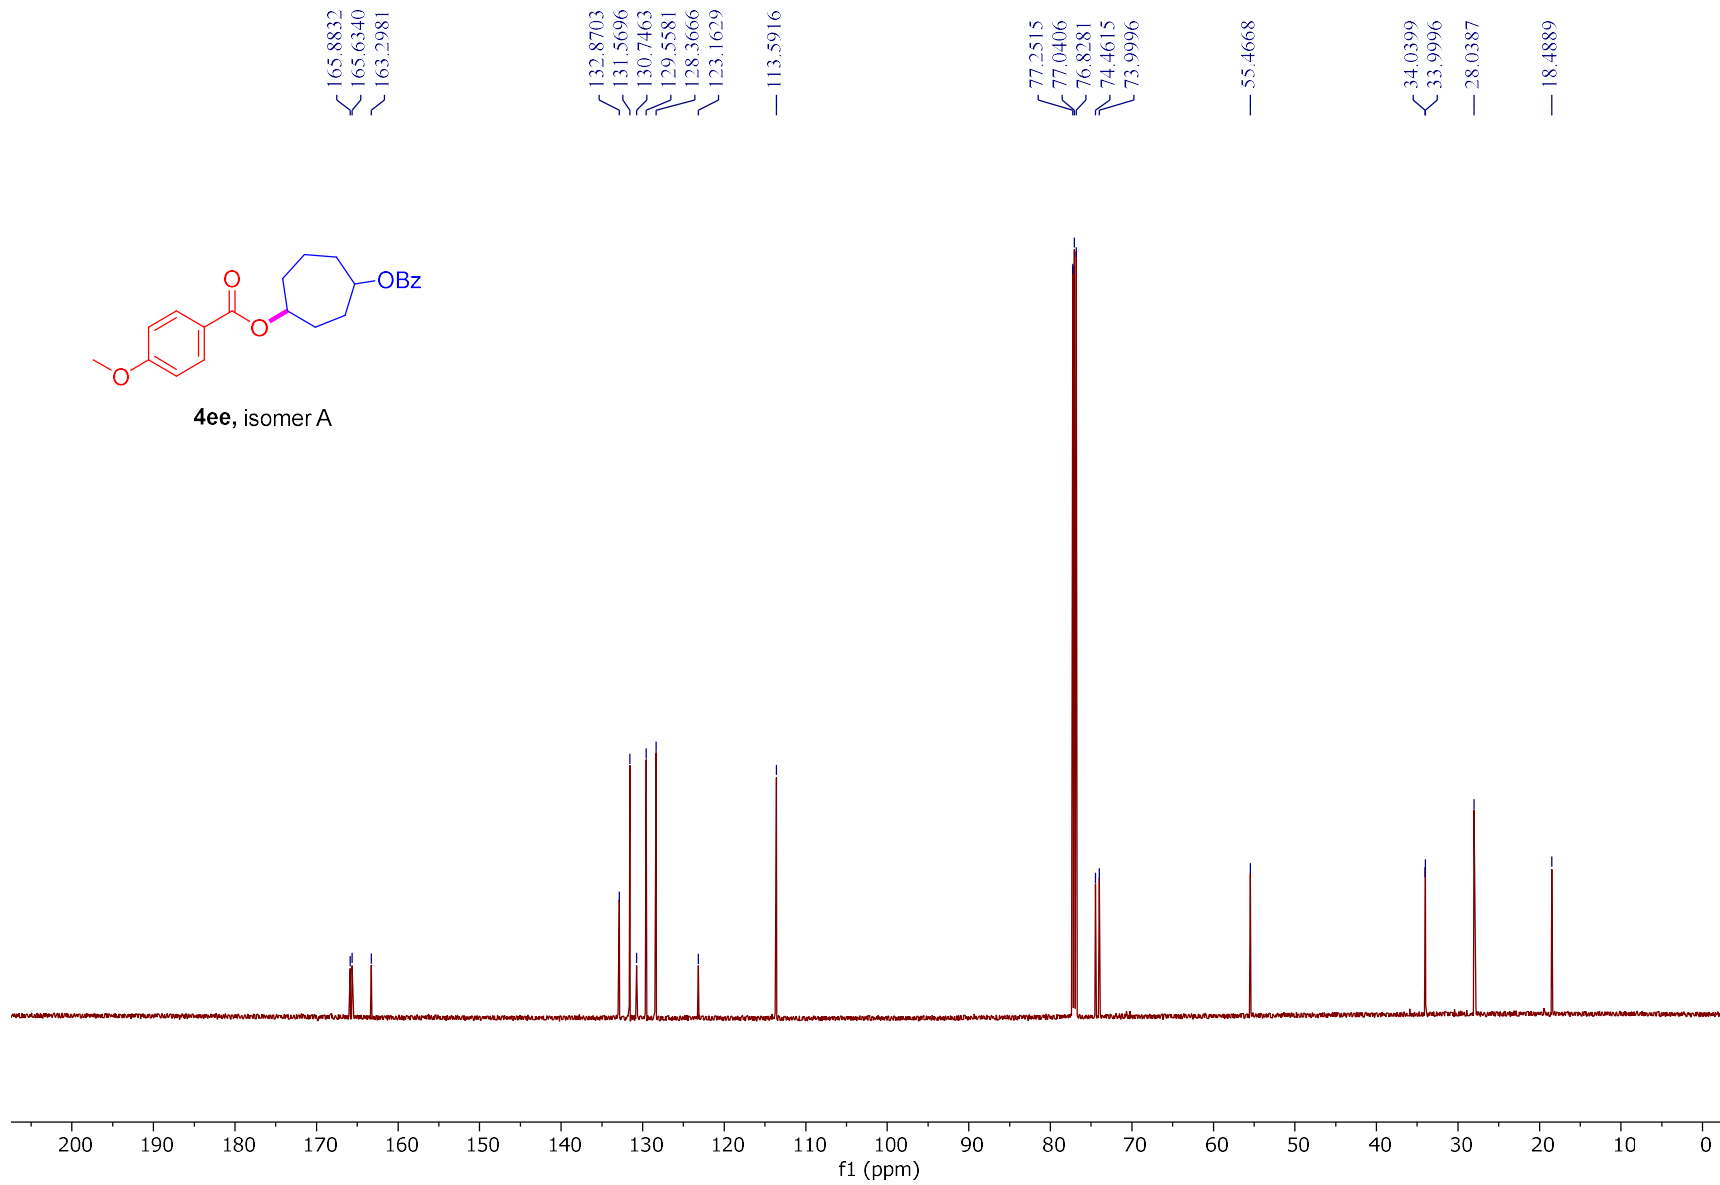

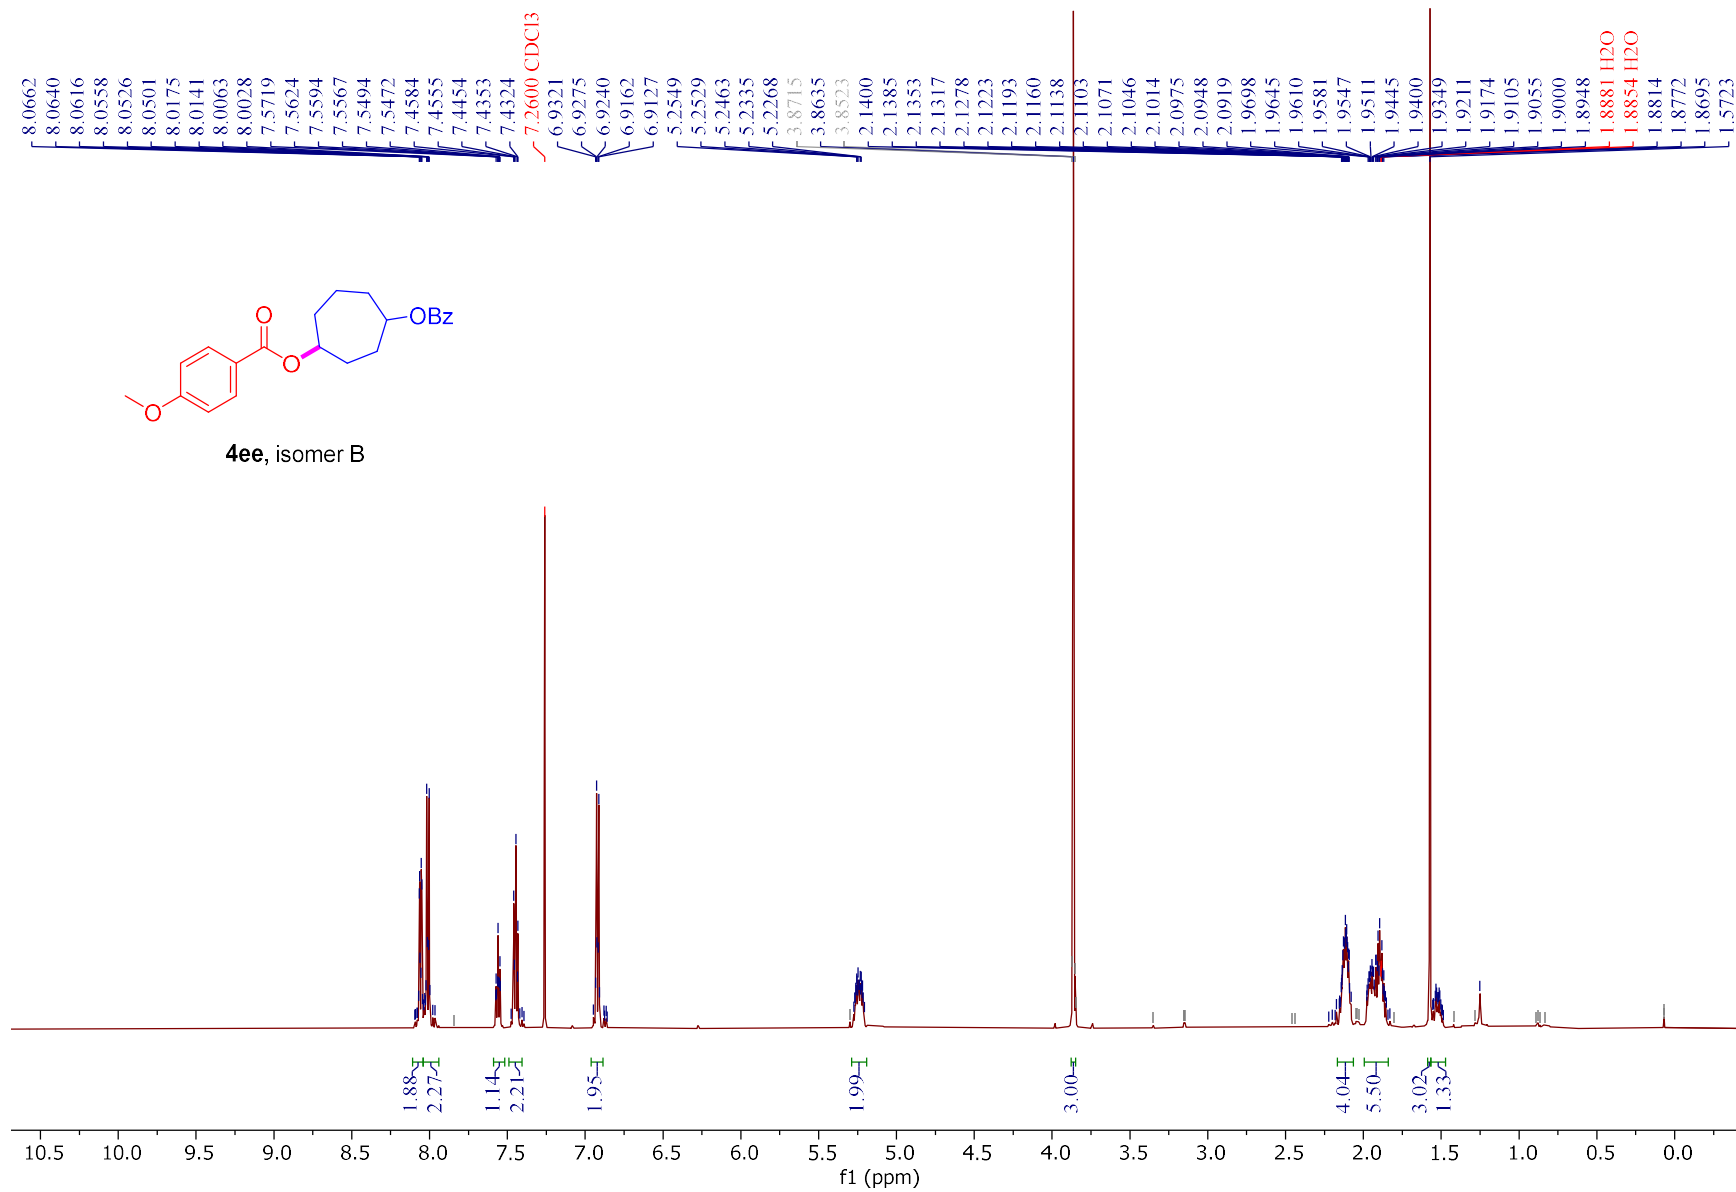

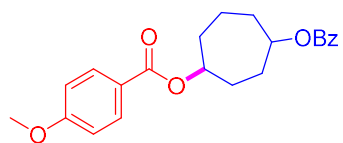

4ee, isomer B

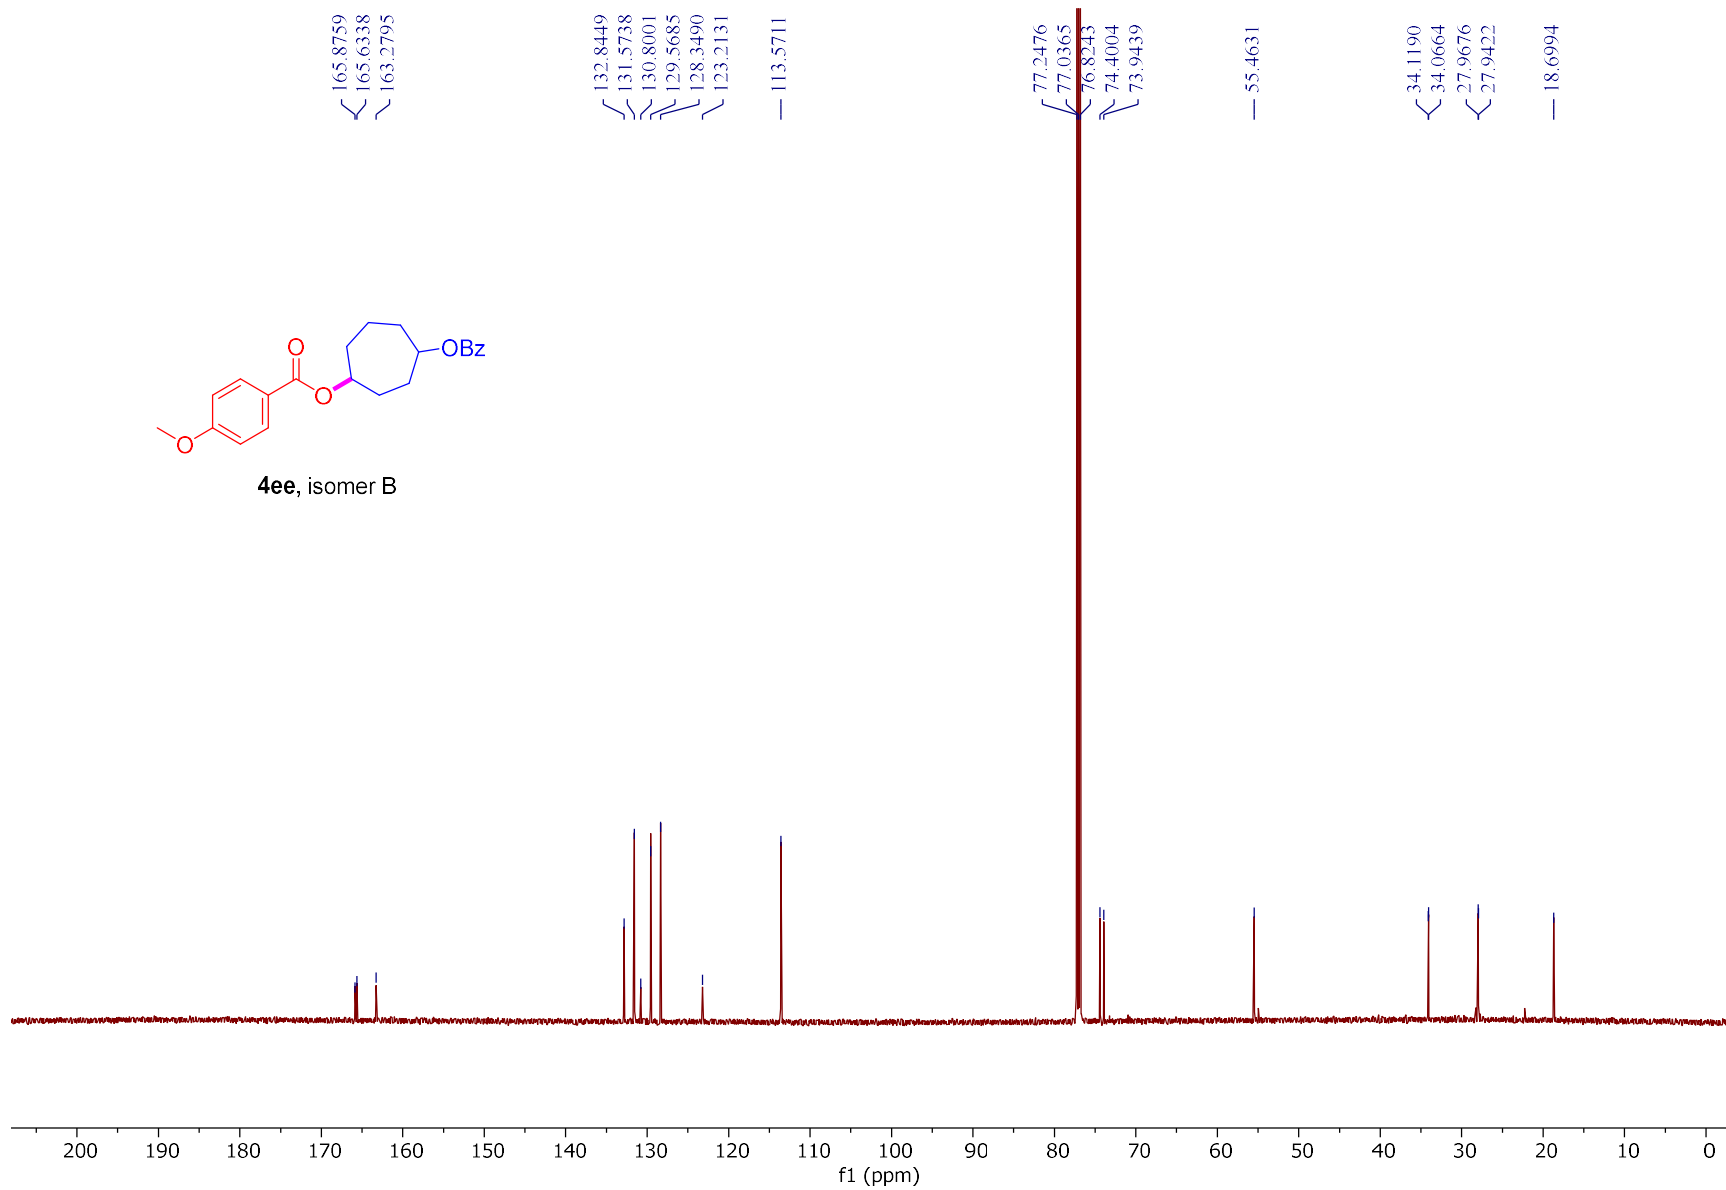

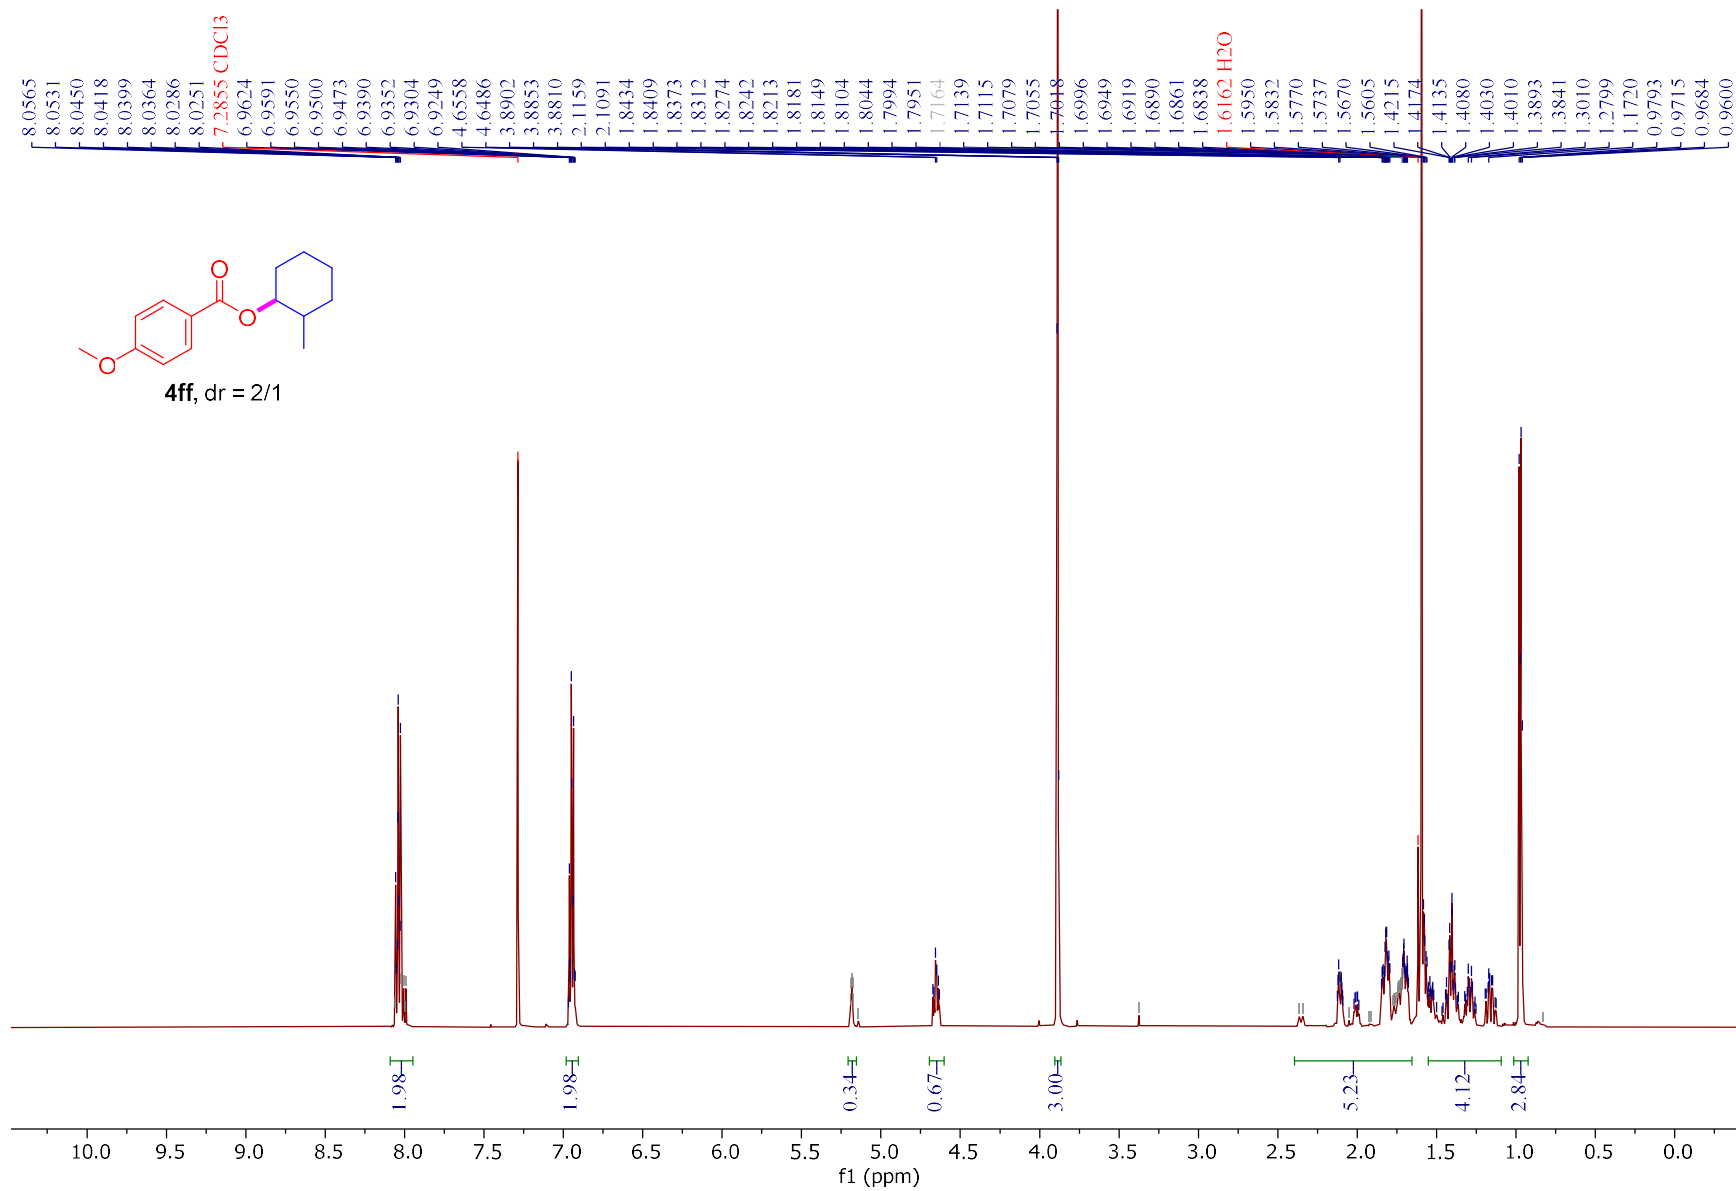



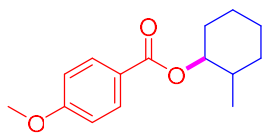

4ff, dr = 2/1

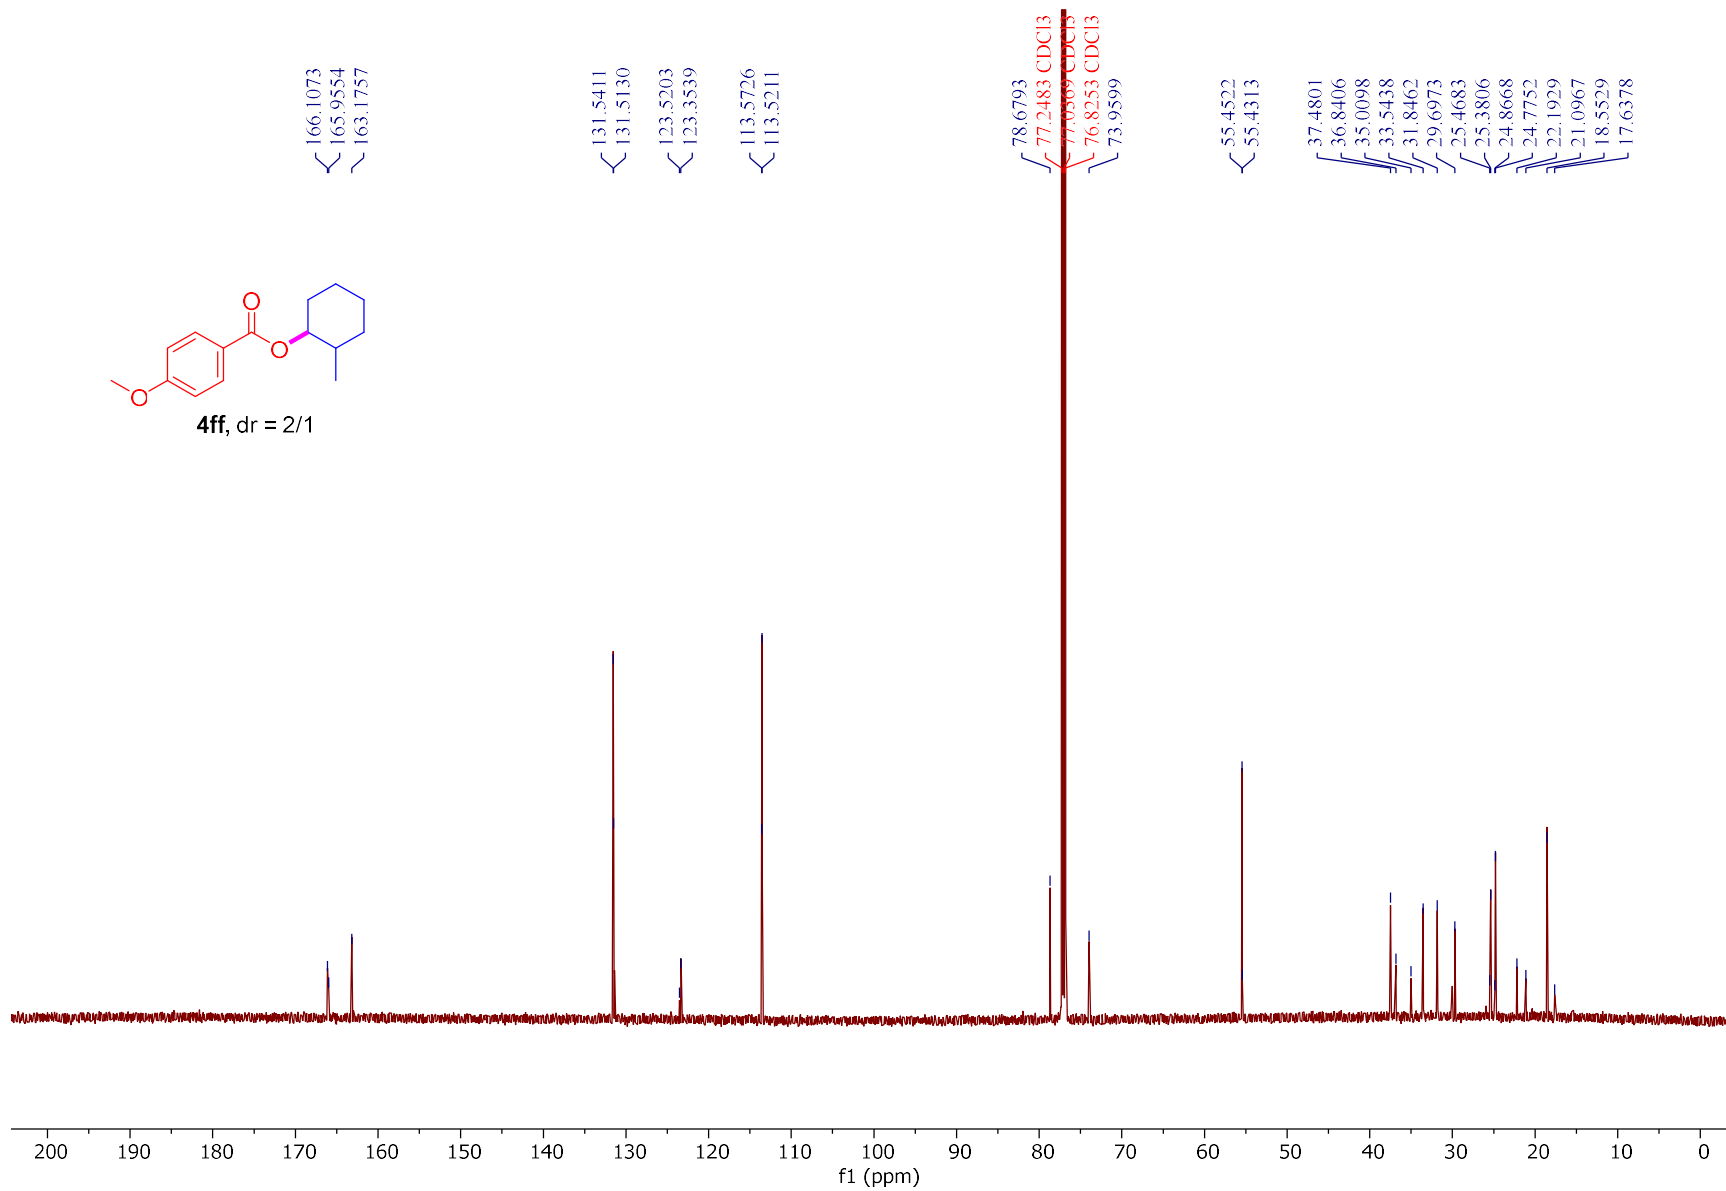

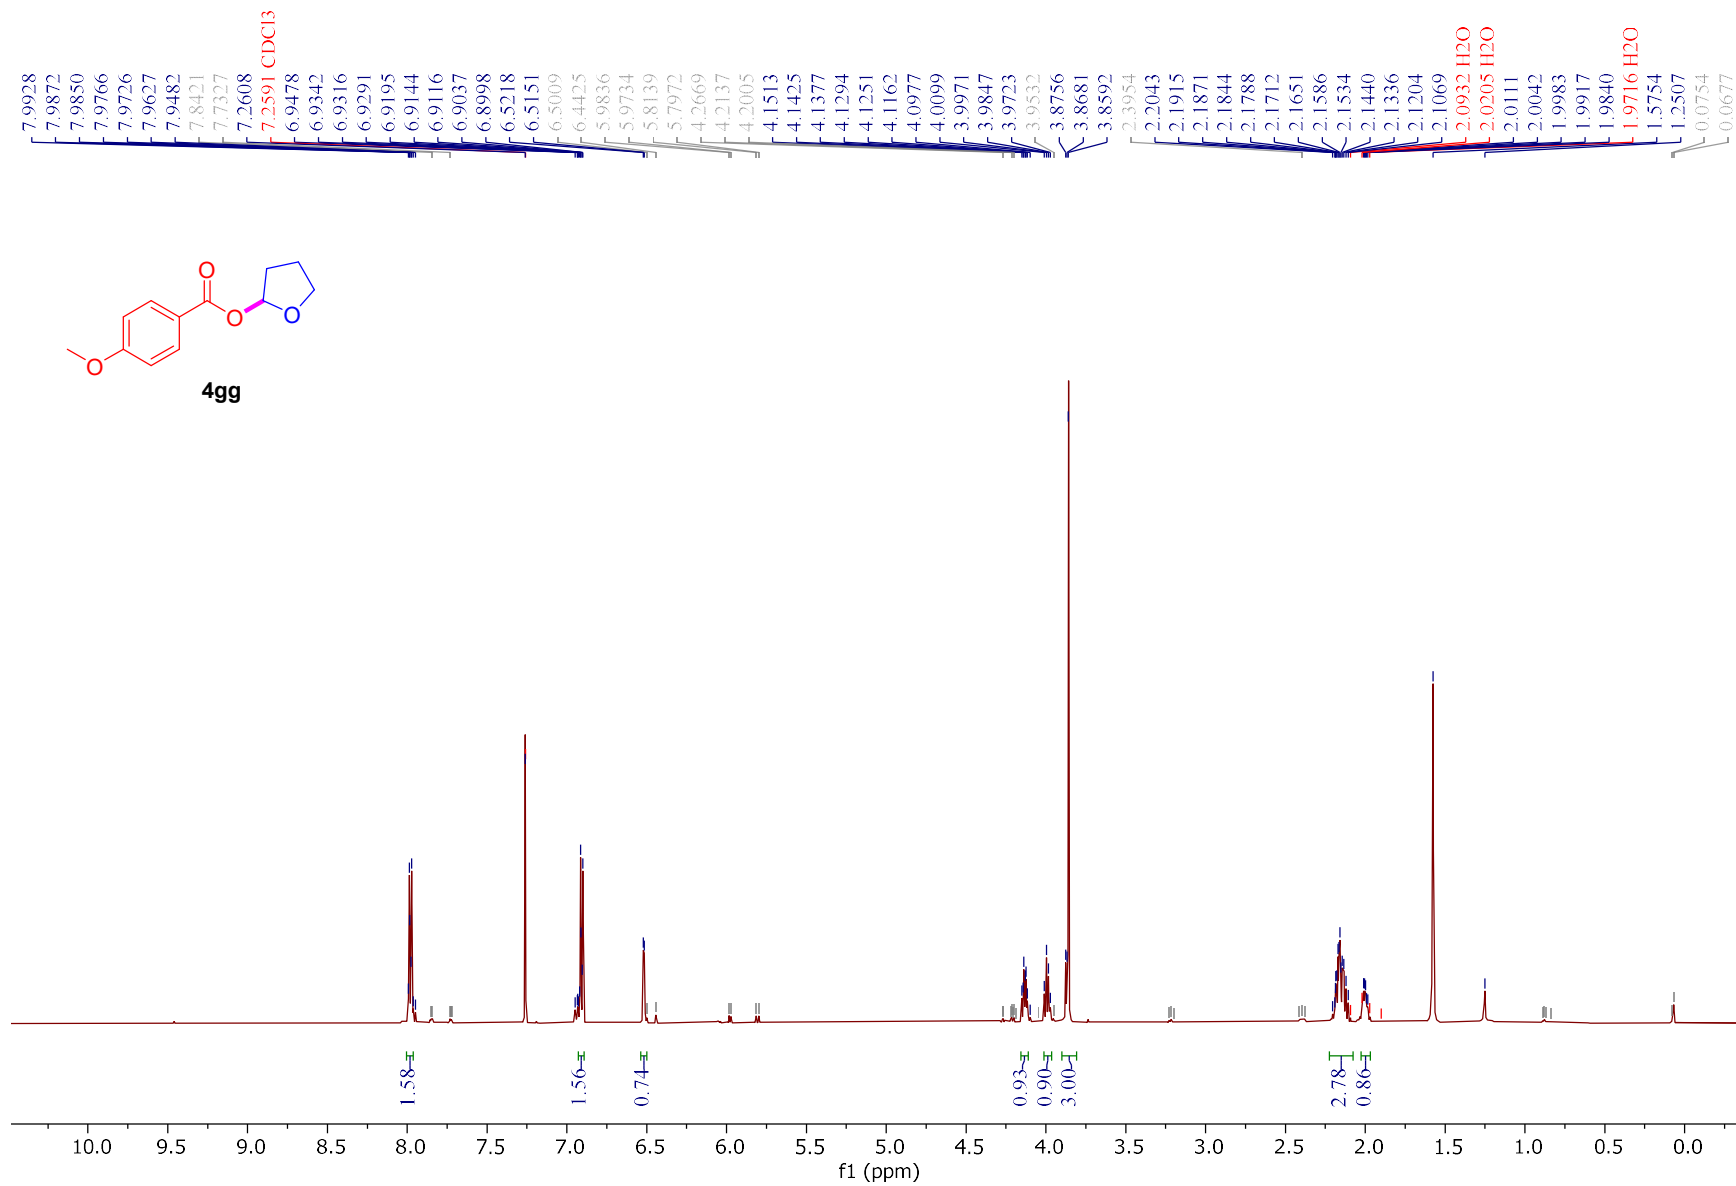

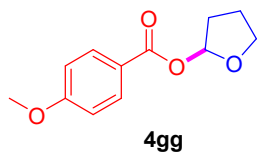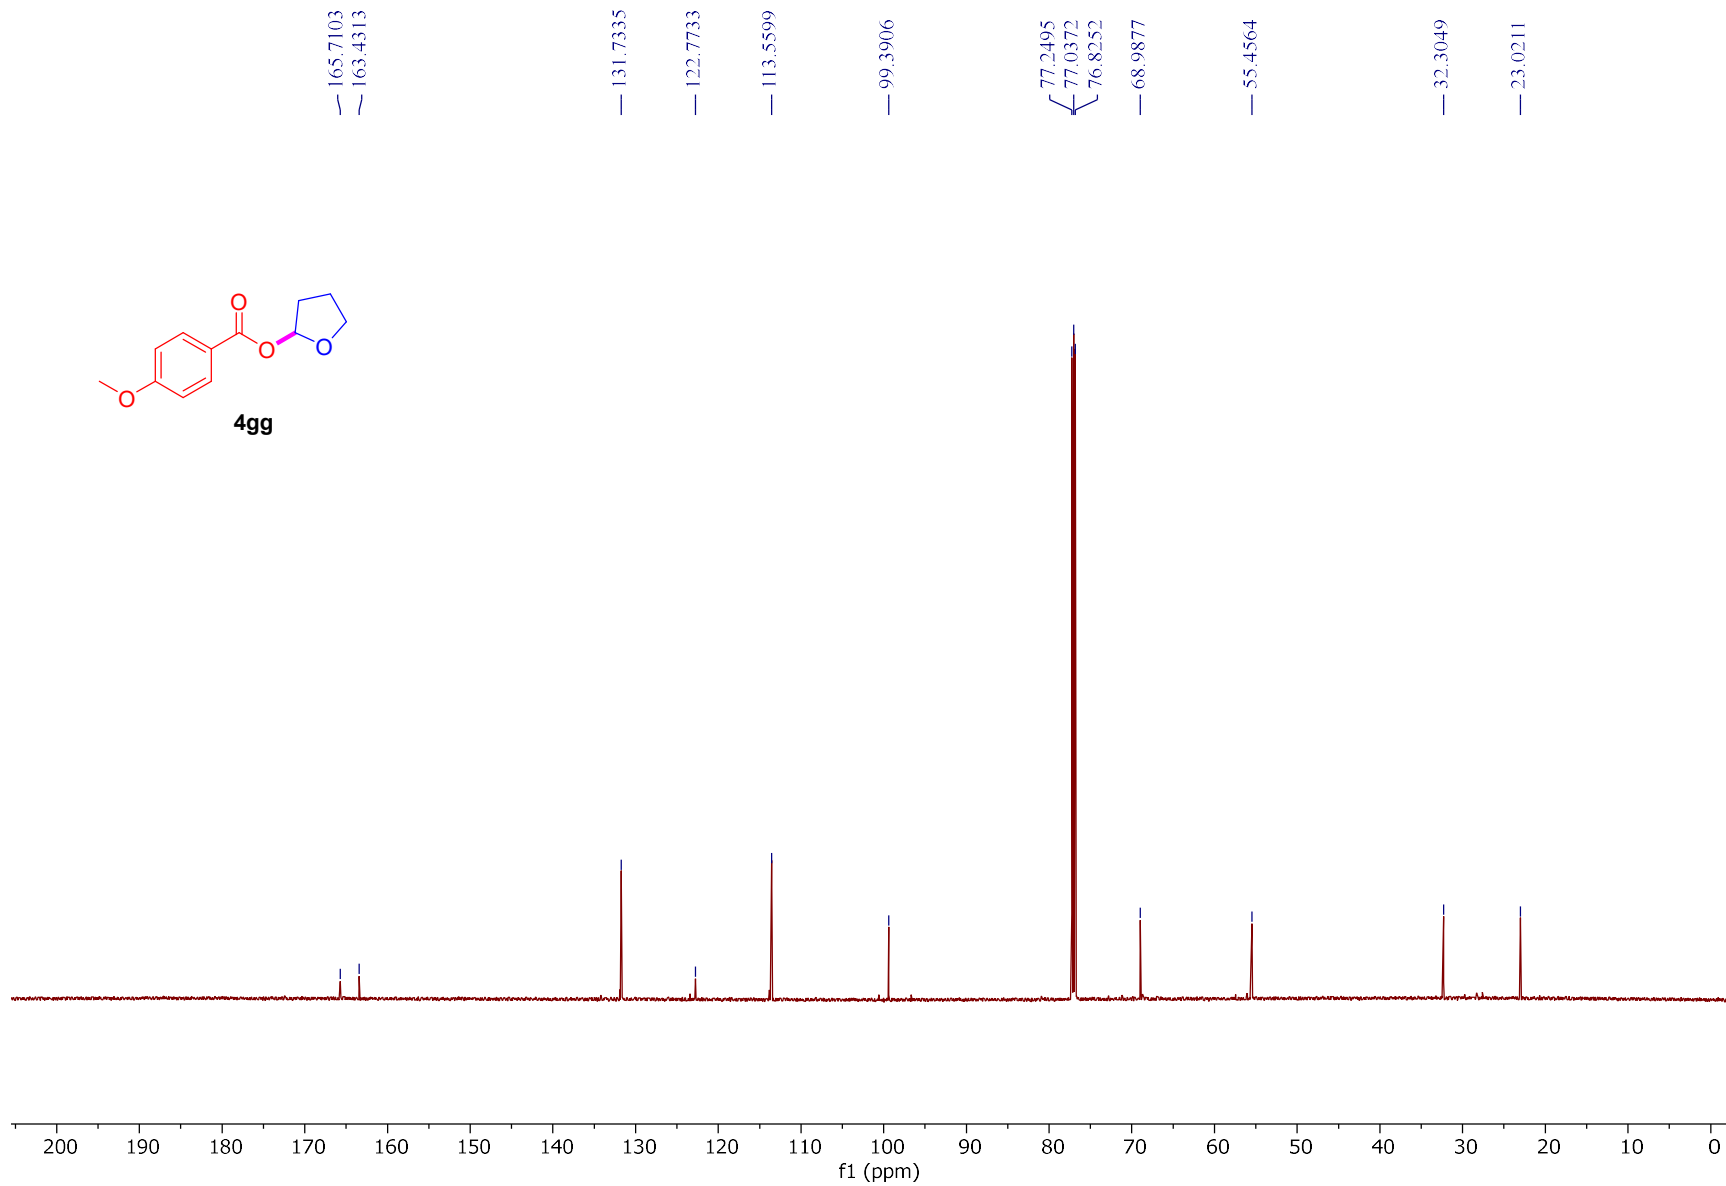

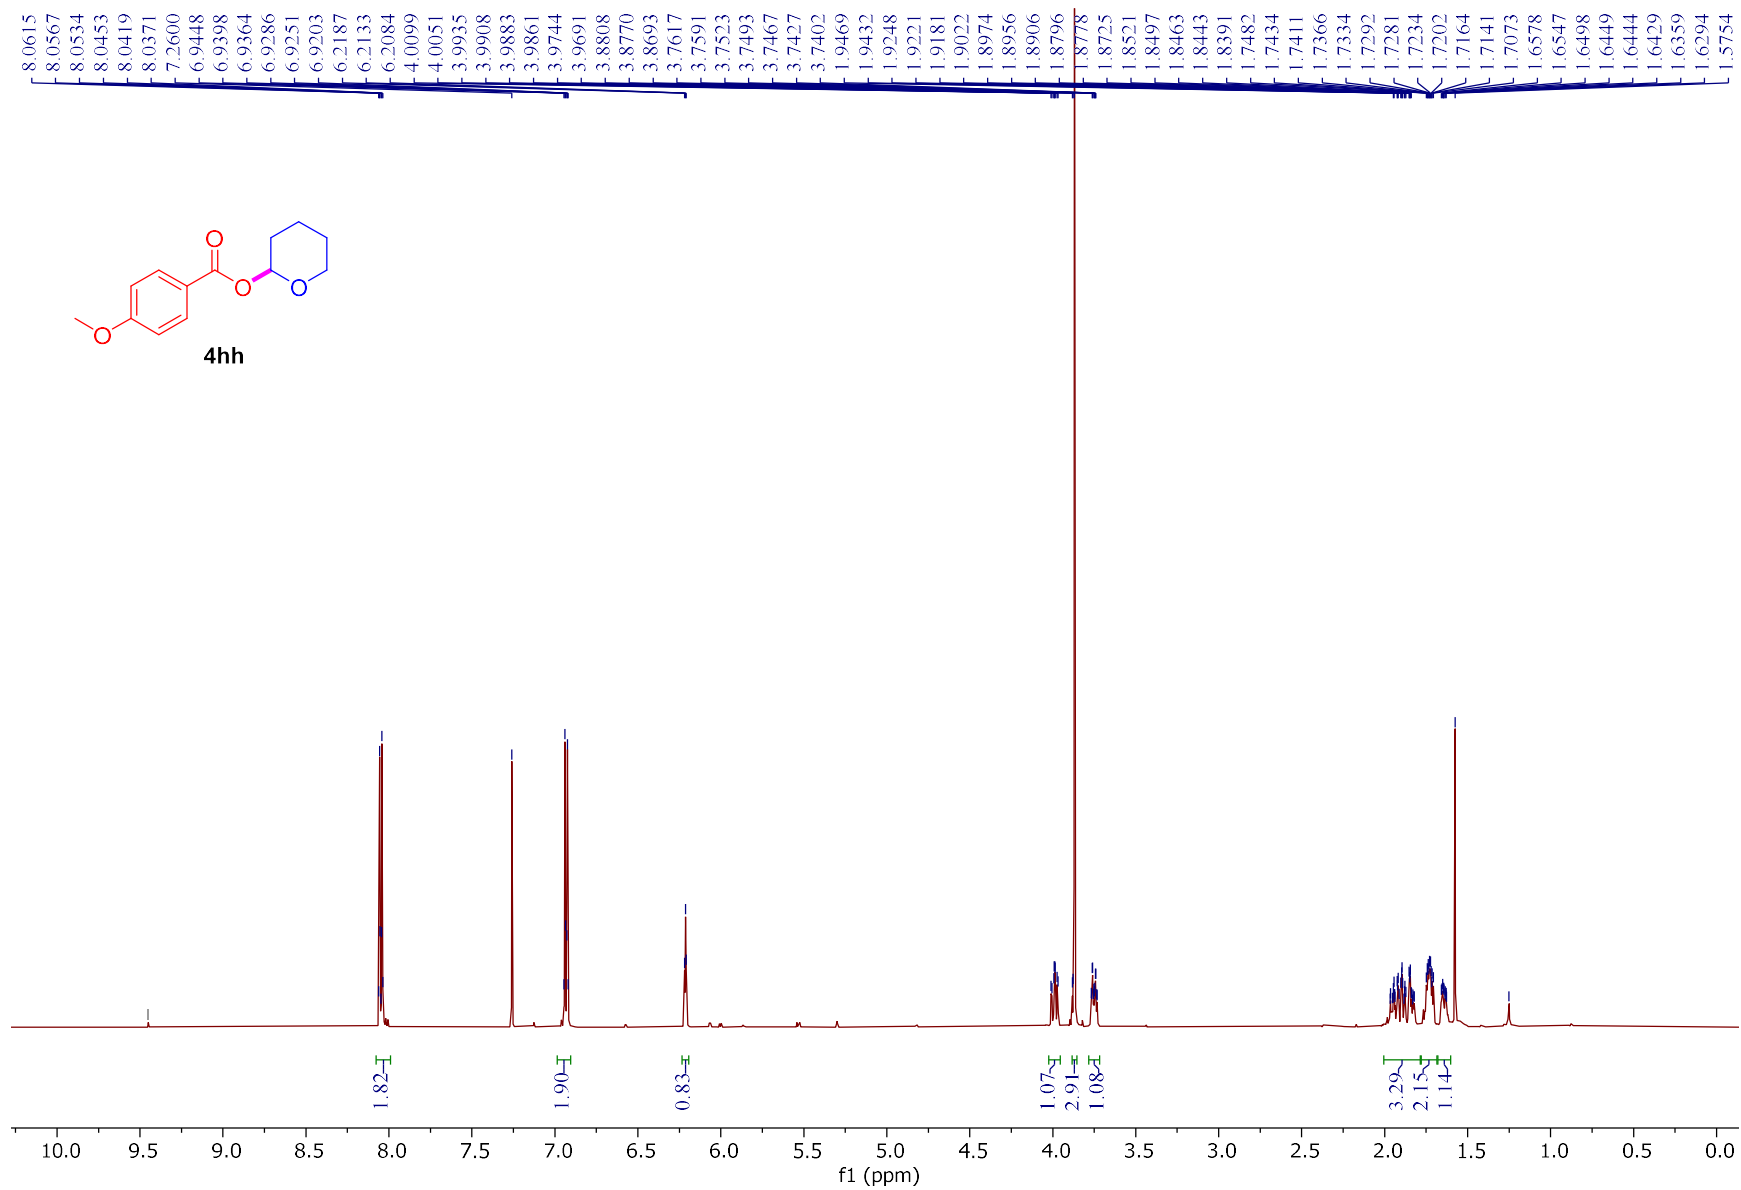

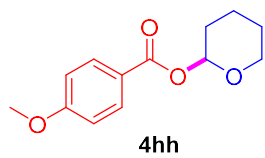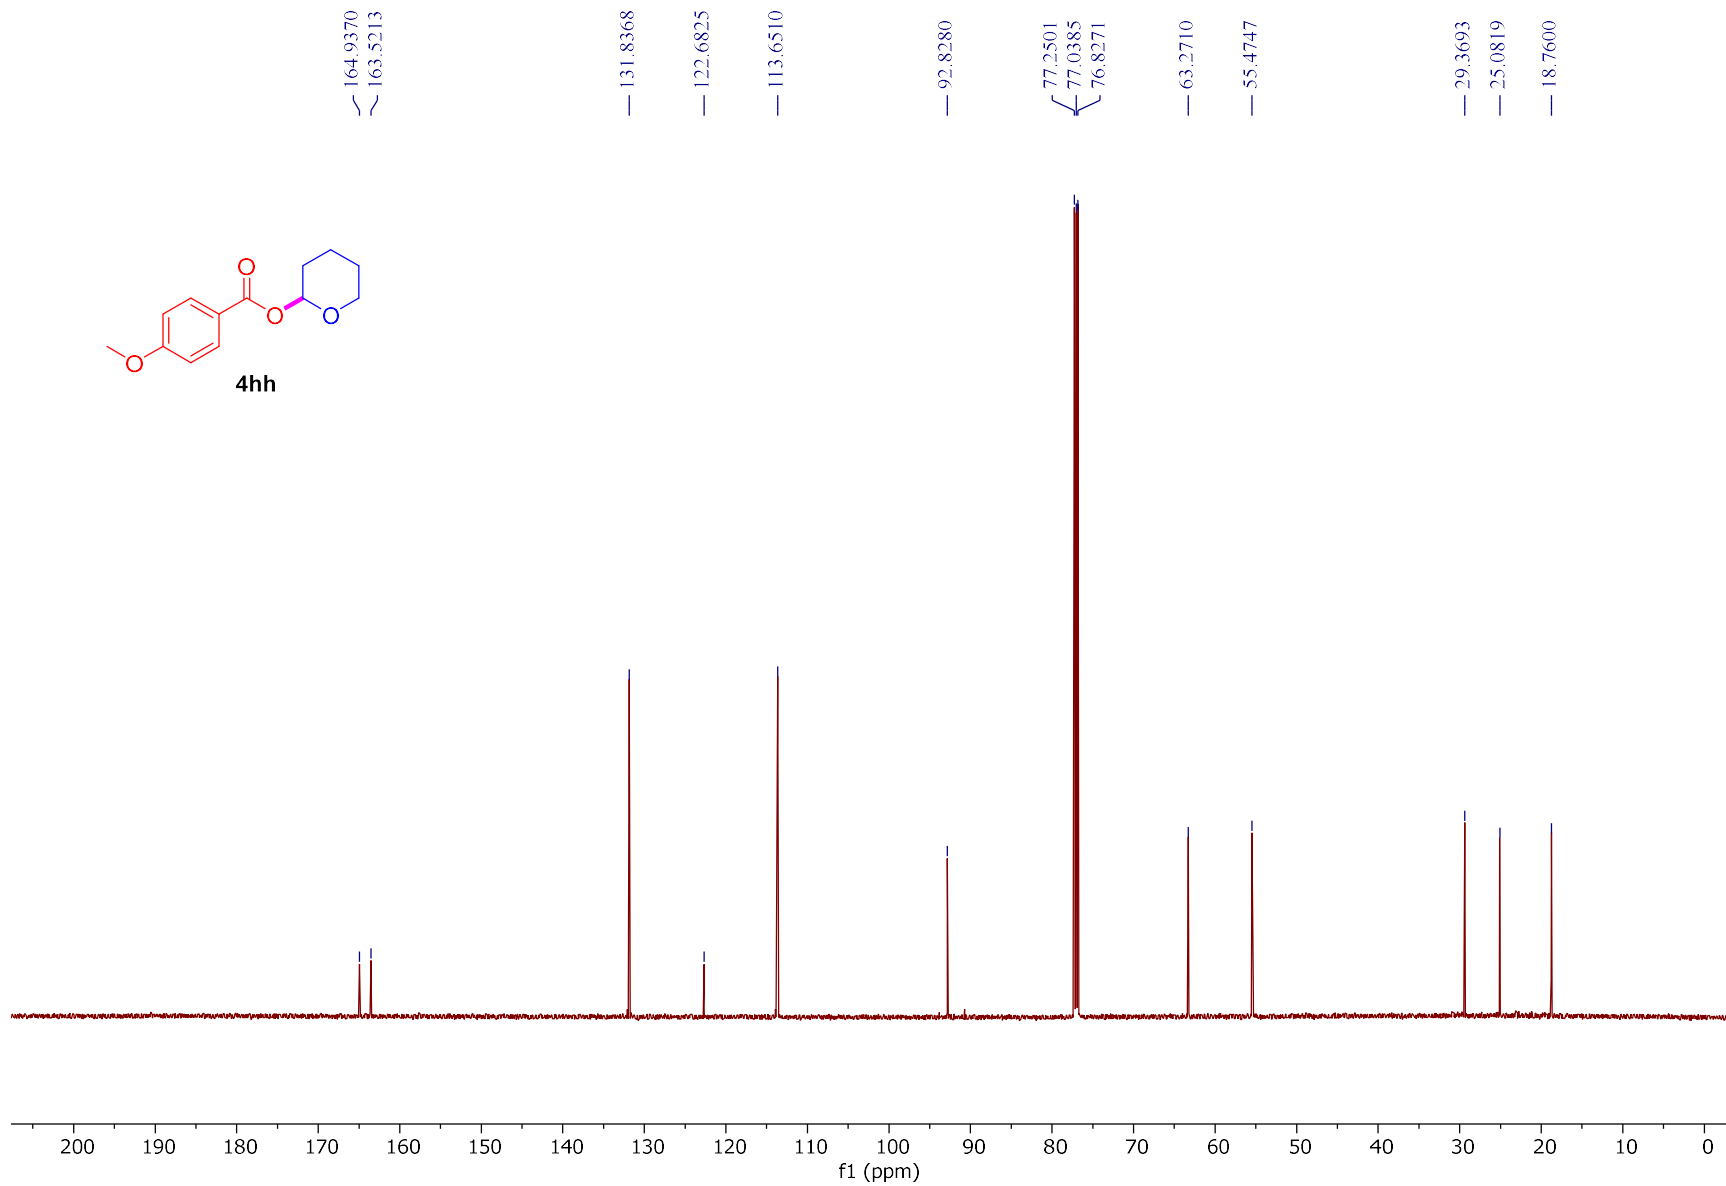

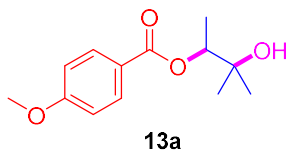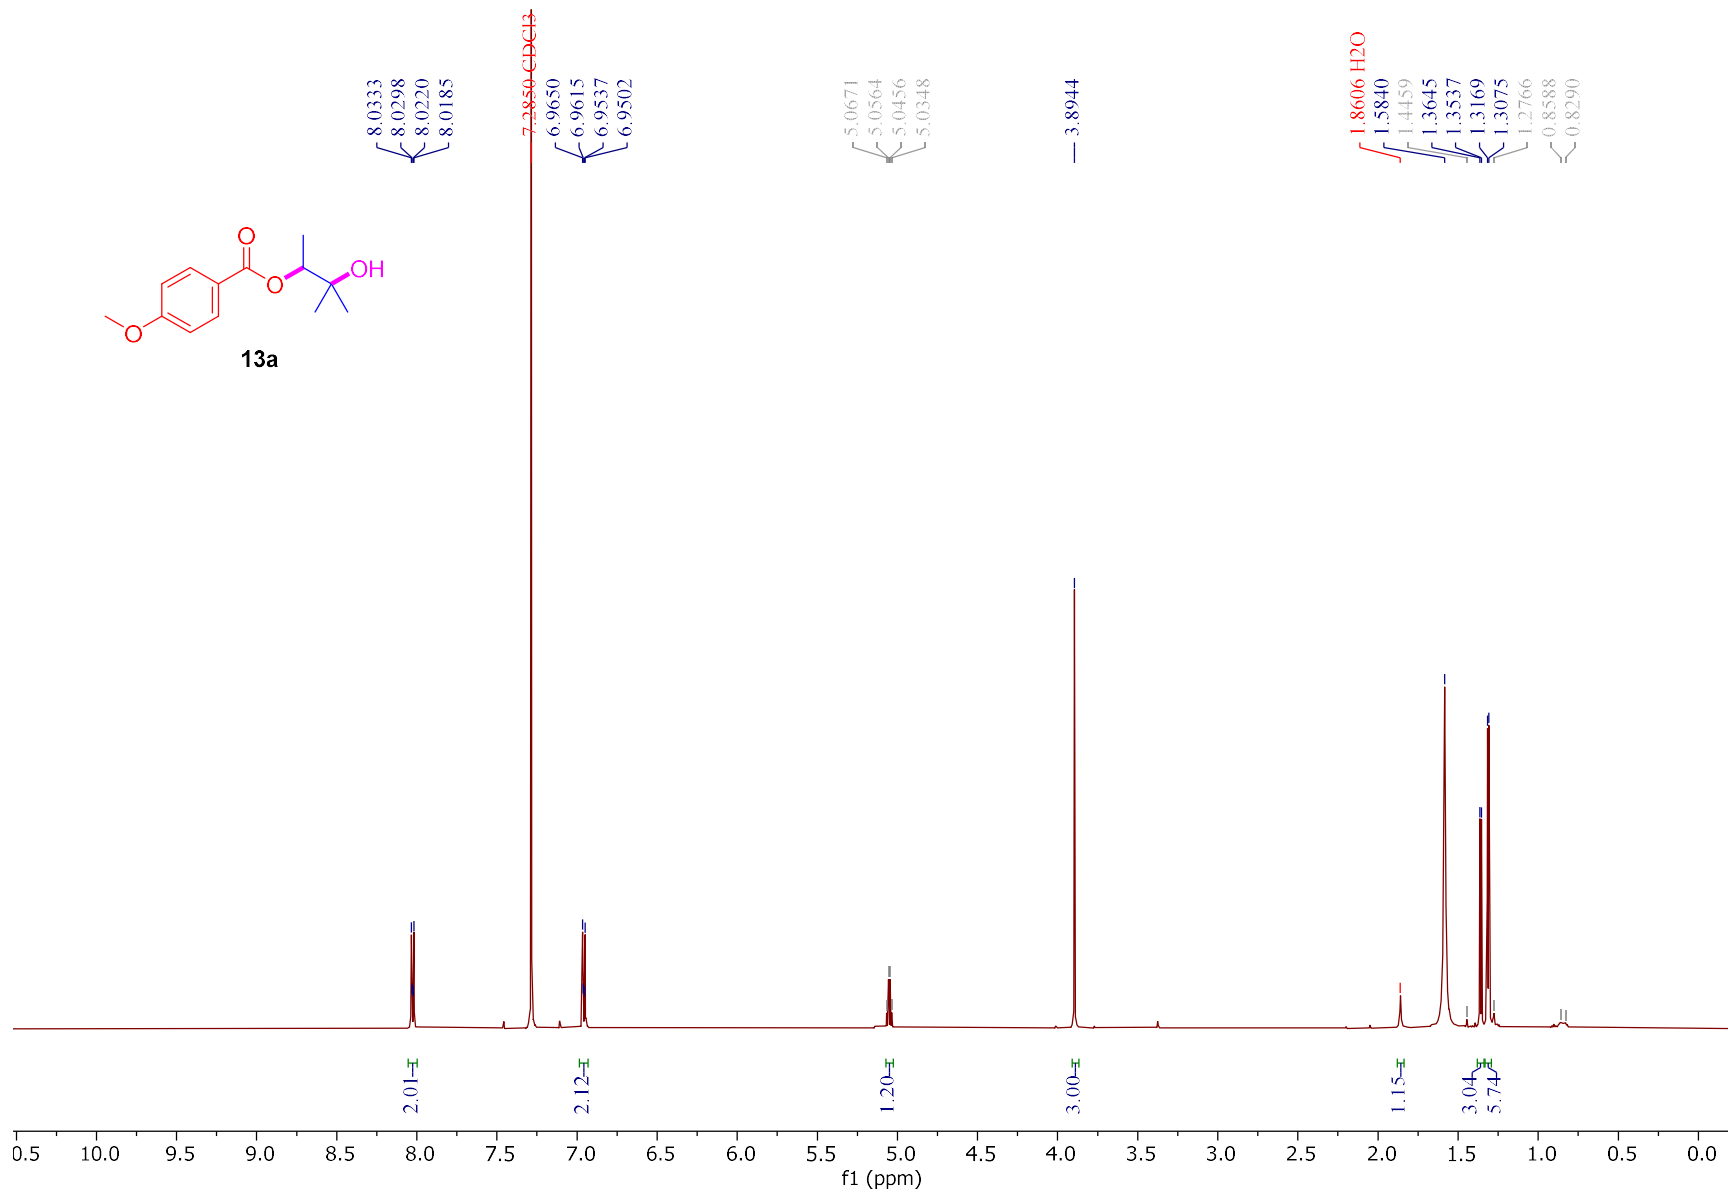

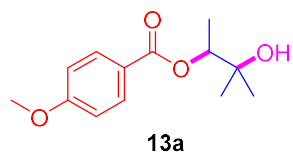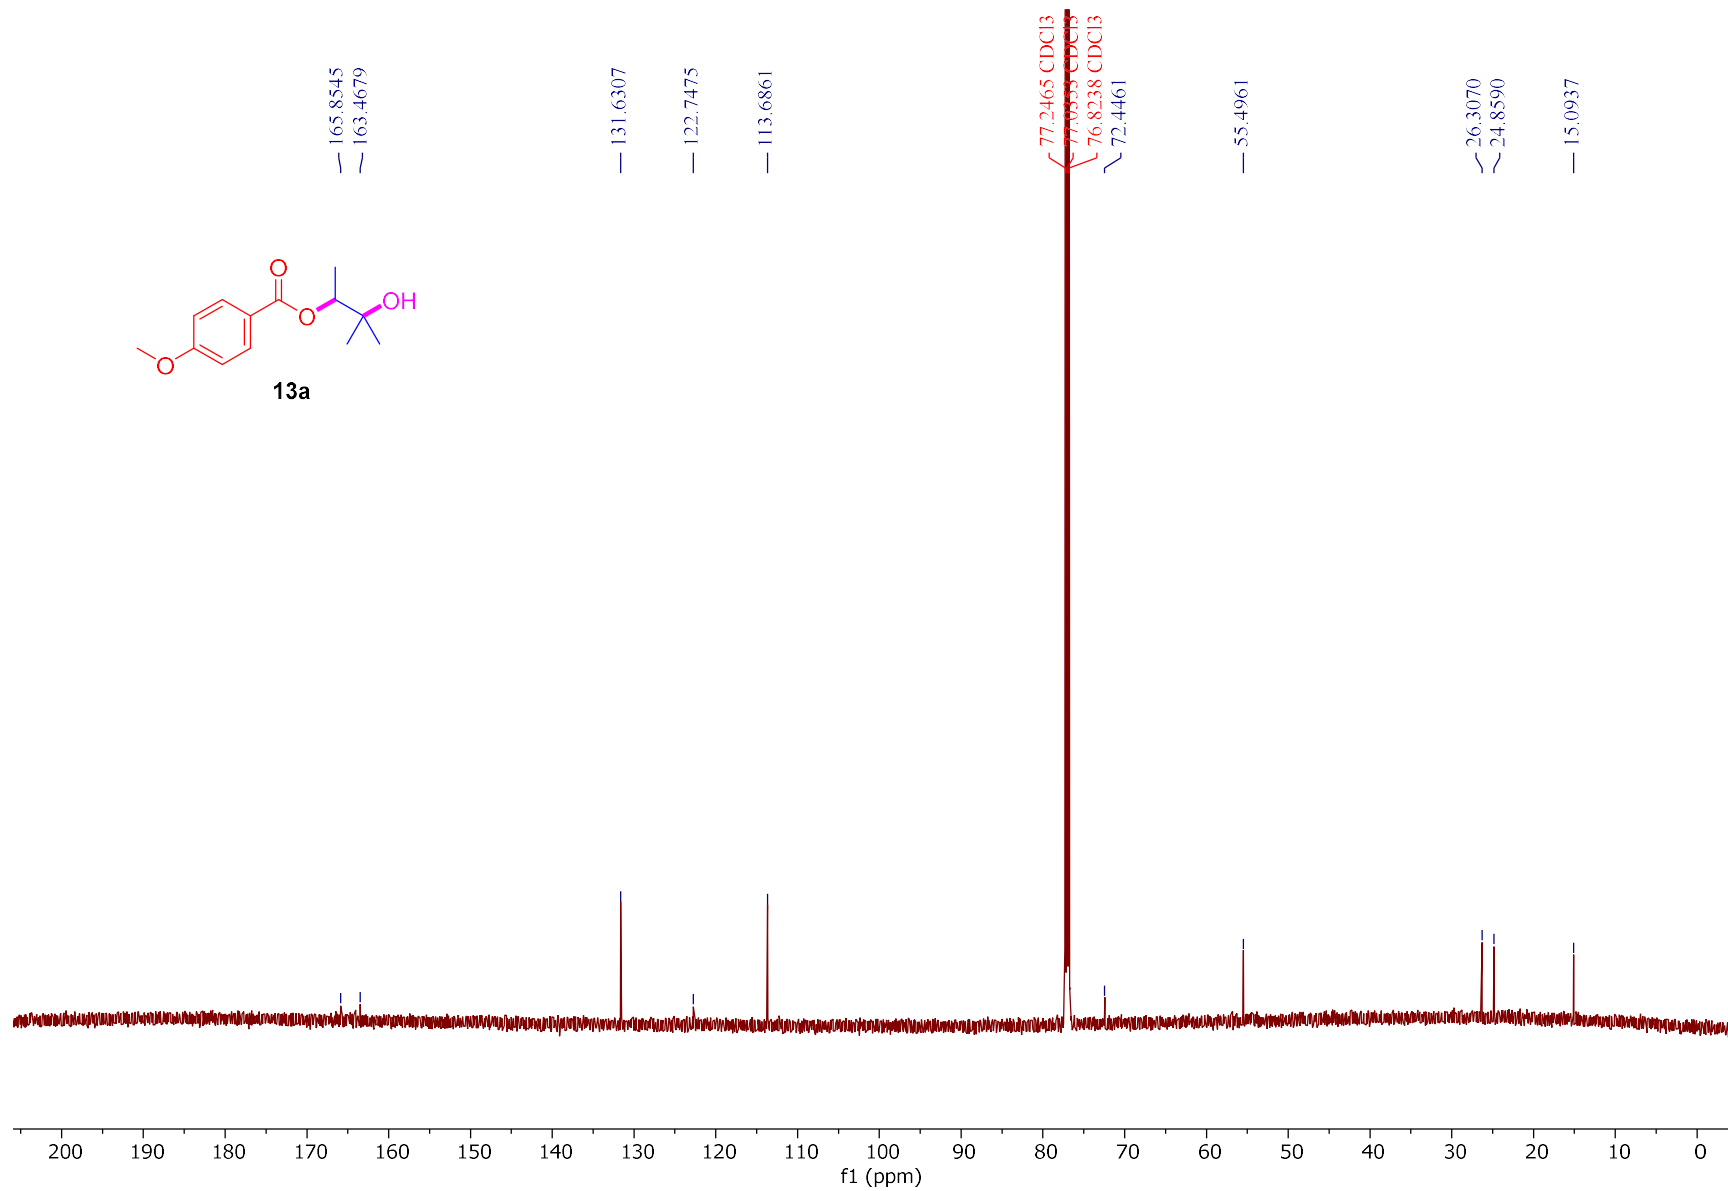

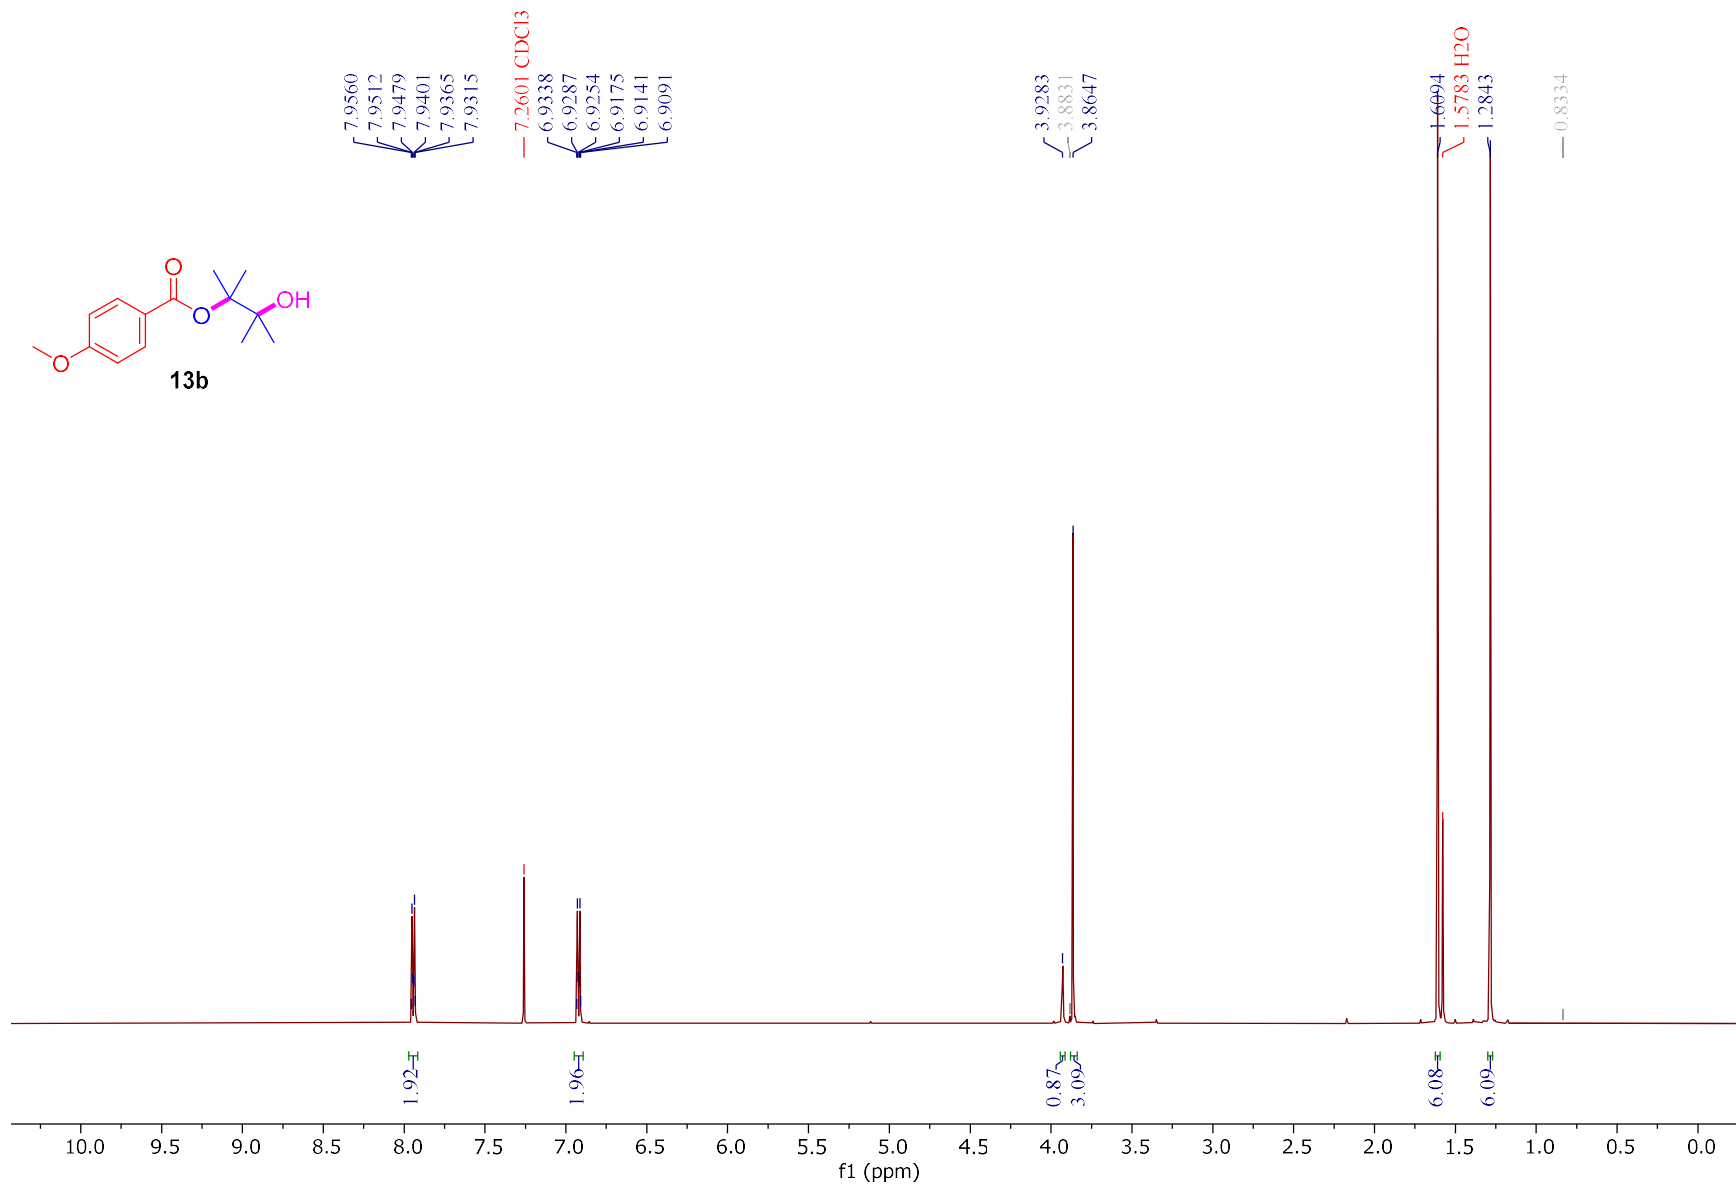



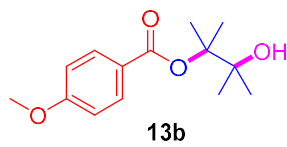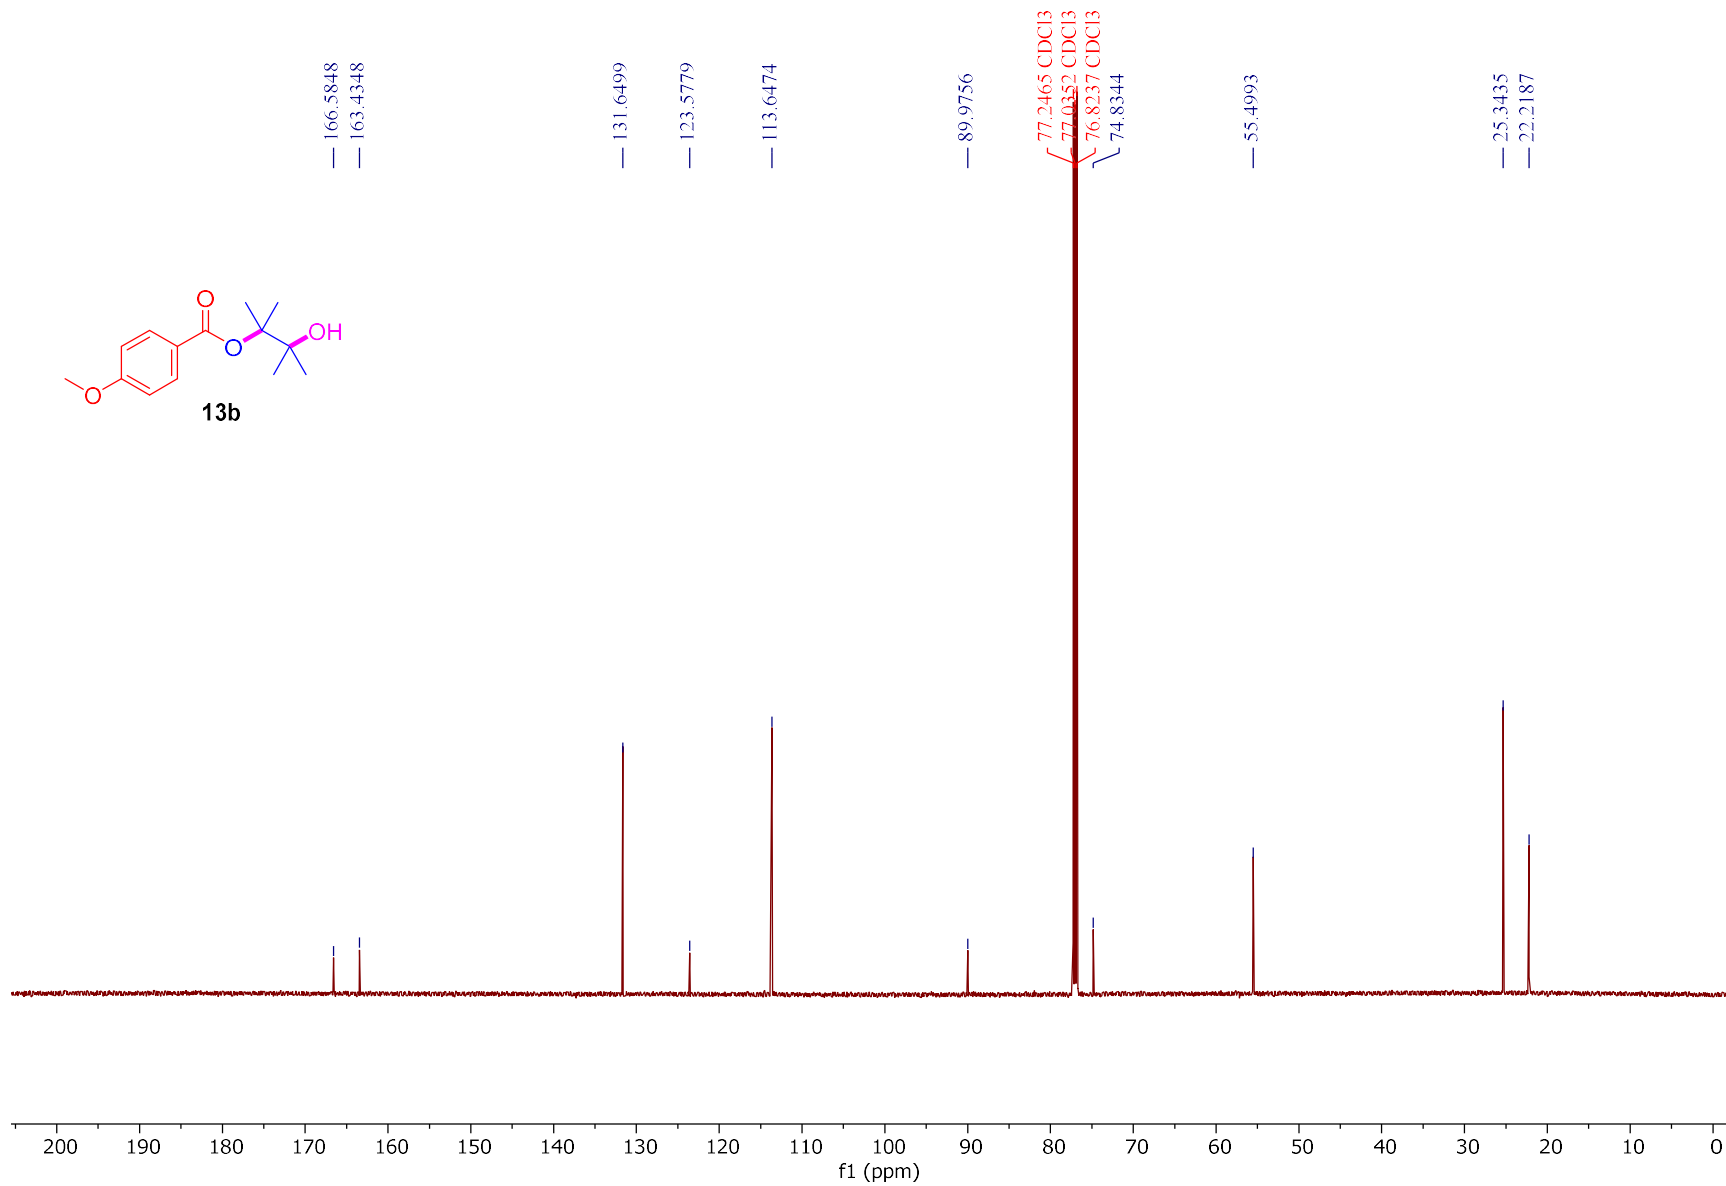

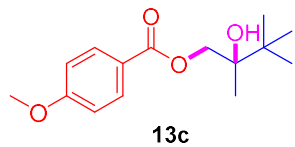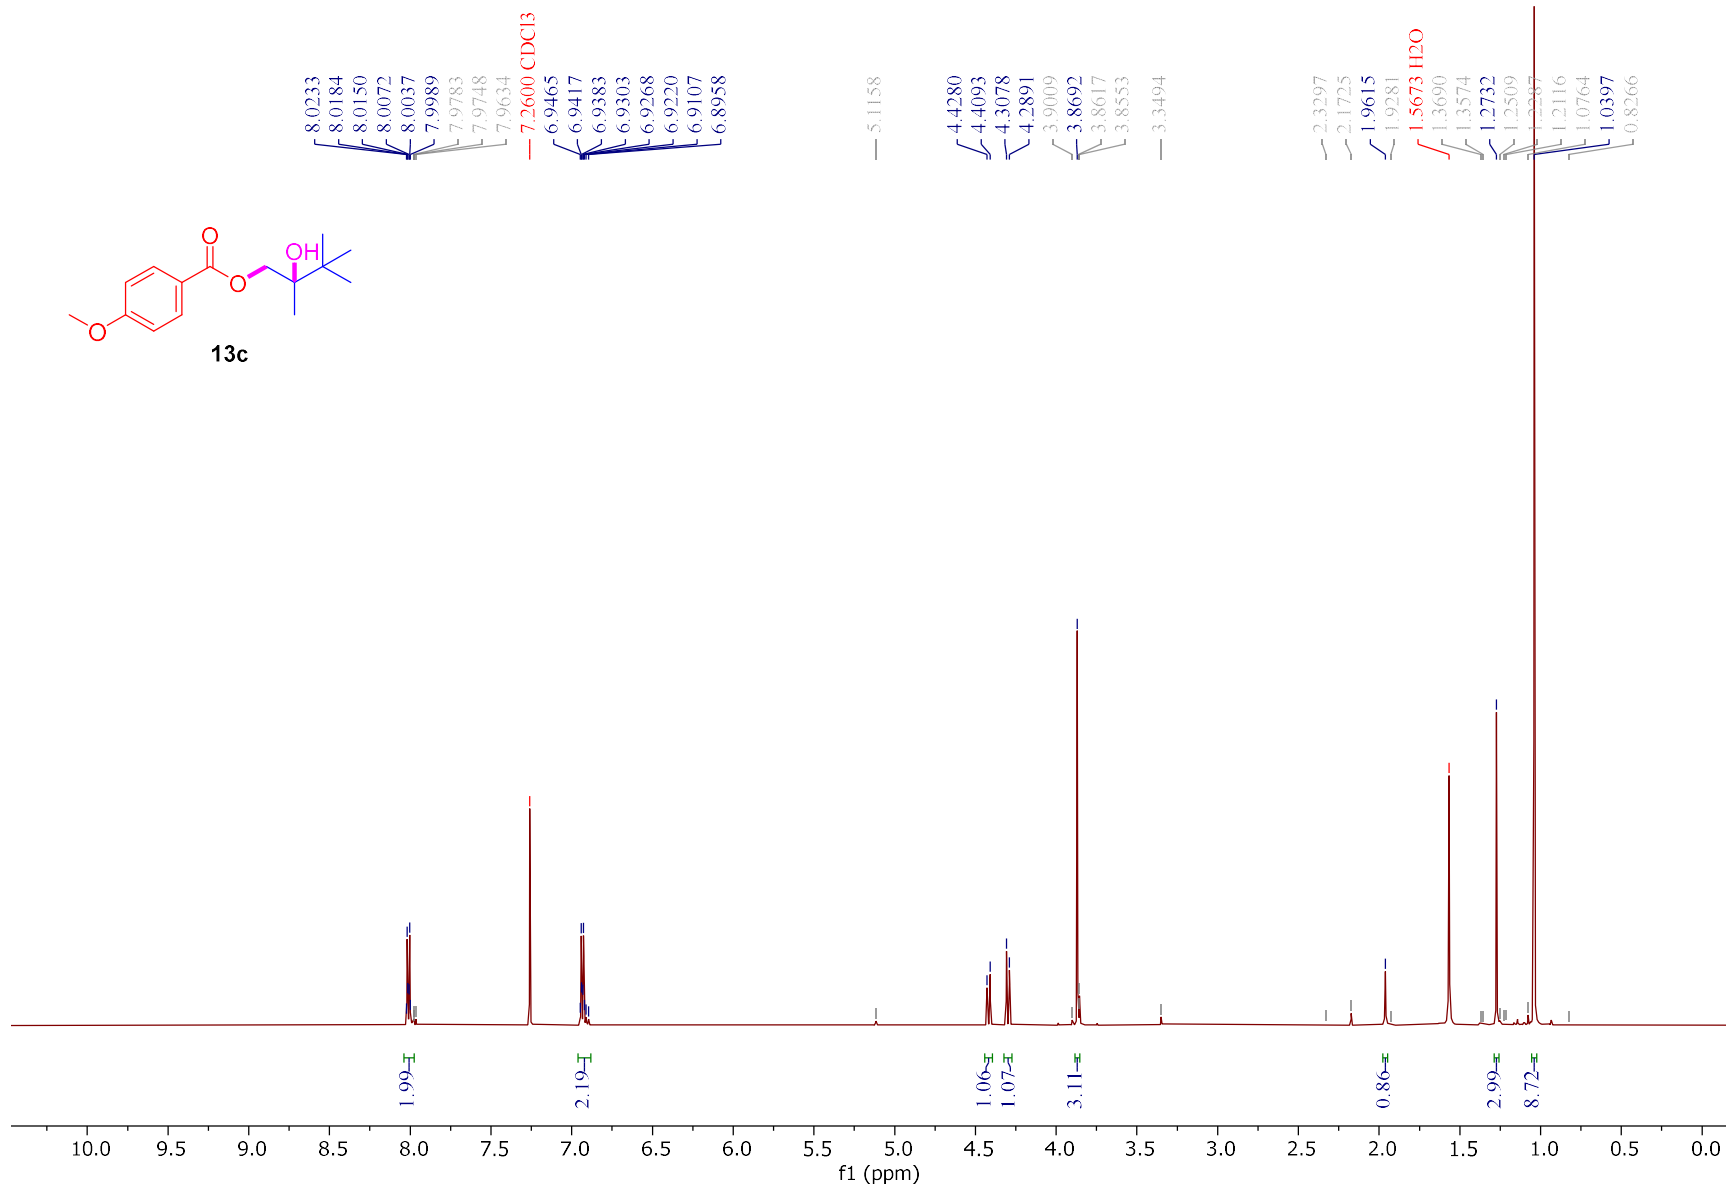

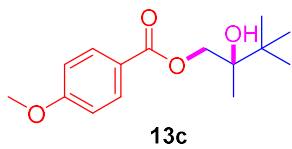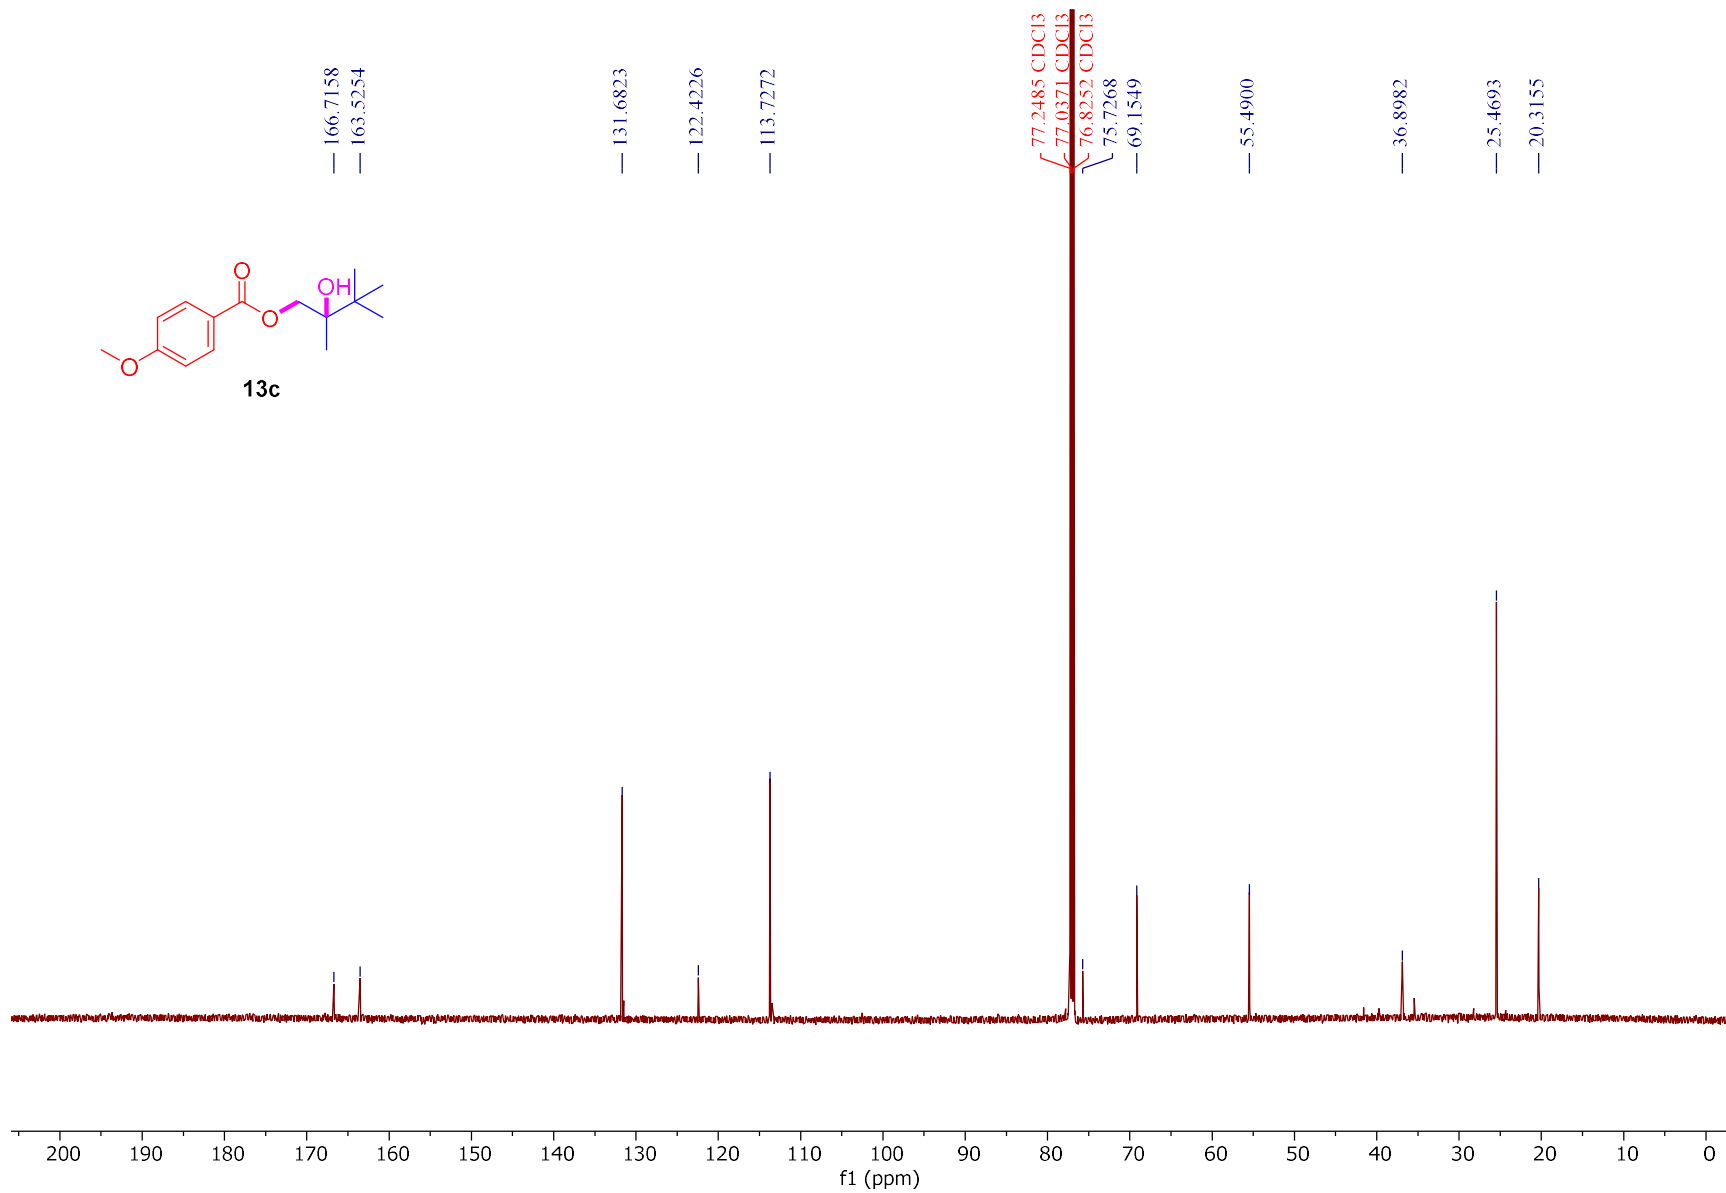

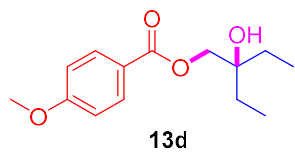

8.0138  
 8.0090  
 8.0057  
 7.9977  
 7.9942  
 7.9895  
 — 7.2600 CDCl<sub>3</sub>  
 6.9398  
 6.9363  
 6.9285  
 6.9250  
 6.9201

— 4.2273  
 — 3.8685

— 2.1723  
 1.8695 H<sub>2</sub>O  
 1.6431  
 1.6305  
 1.6179  
 1.6054  
 1.5717  
 0.9594  
 0.9468  
 0.9342

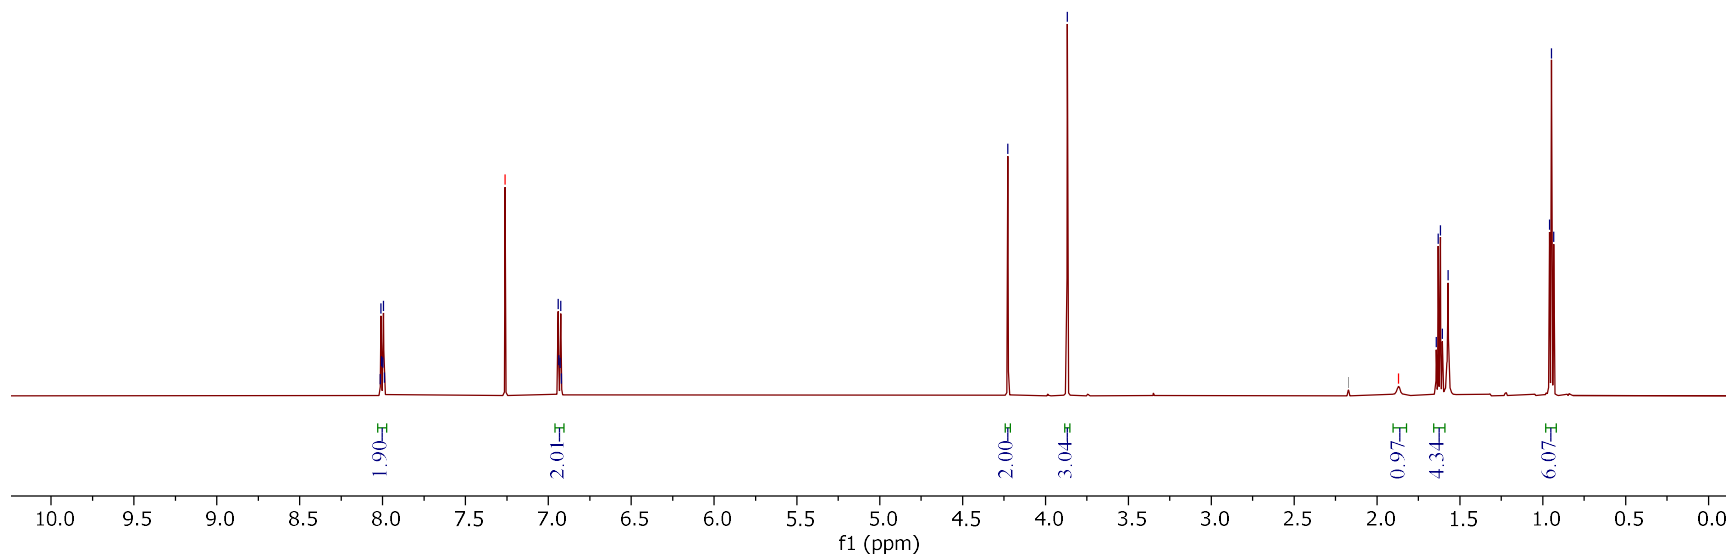

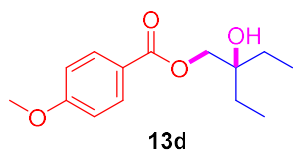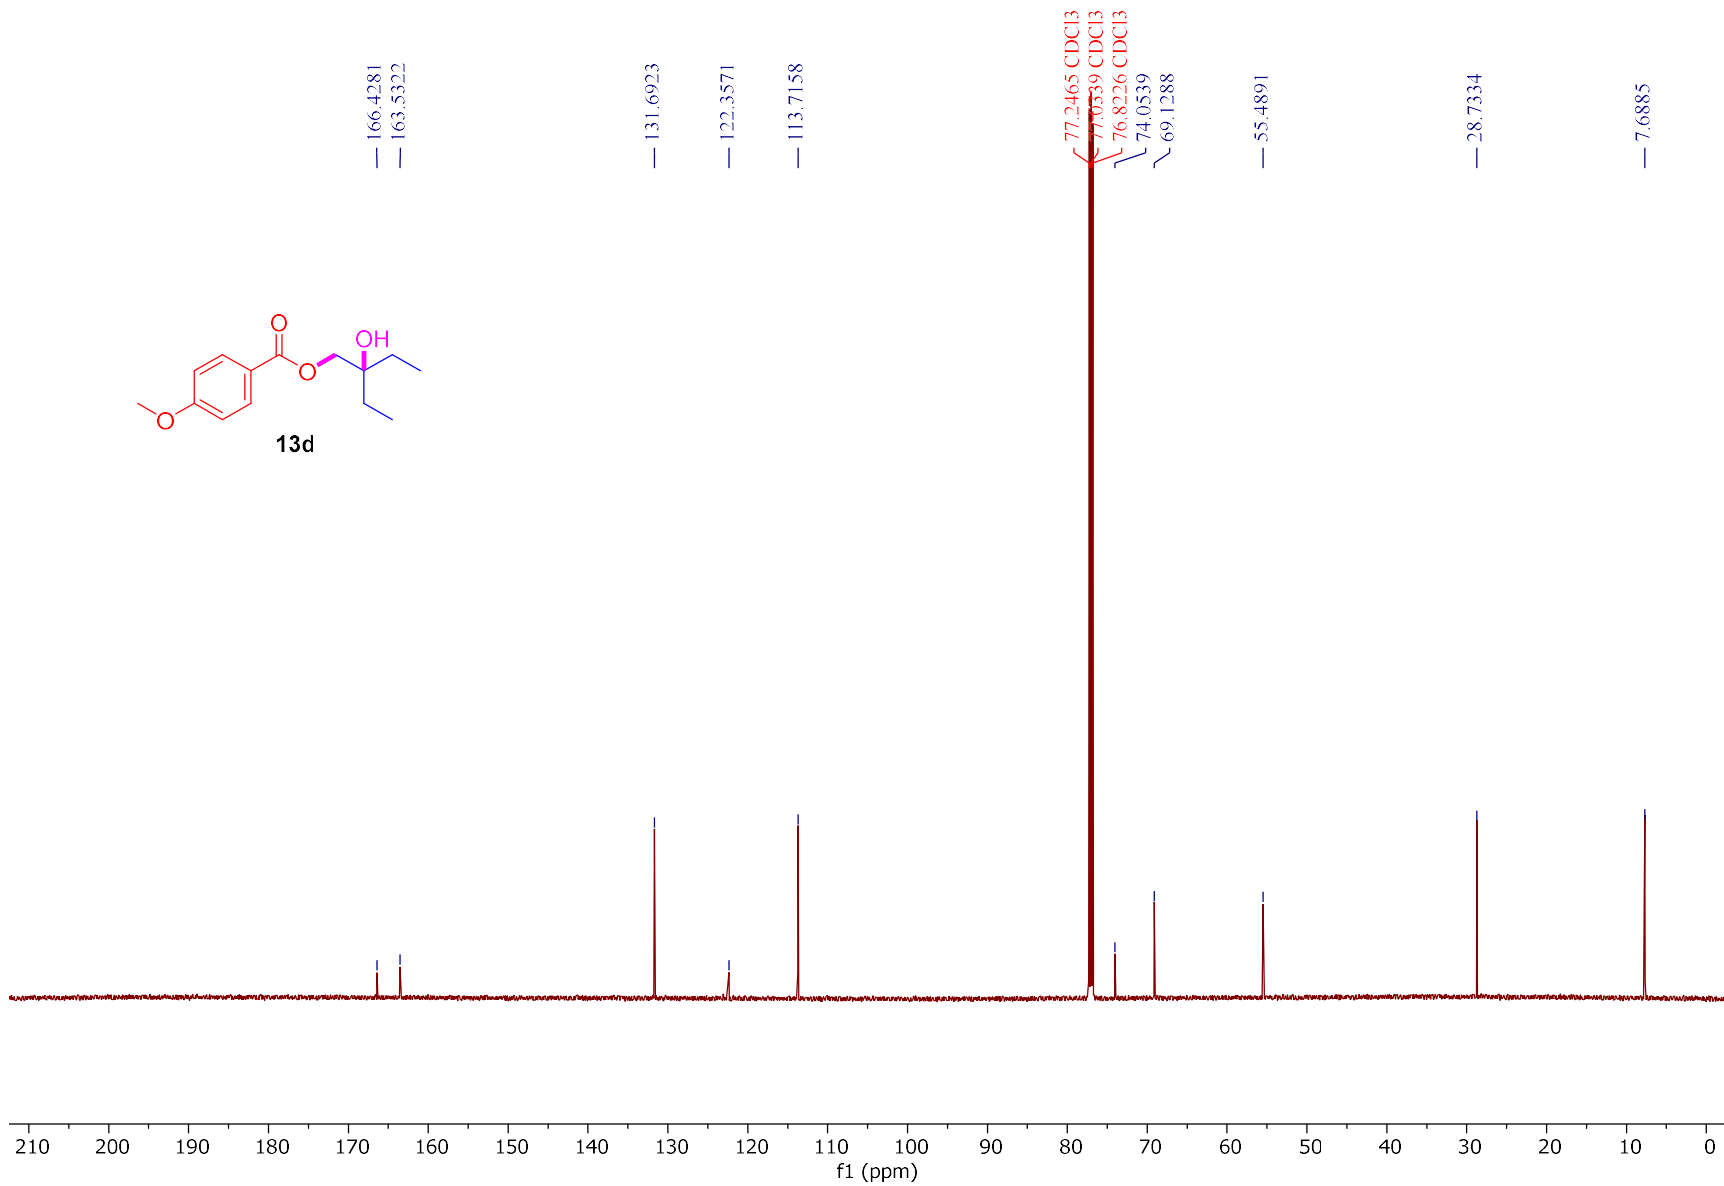

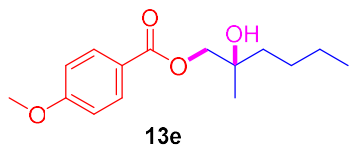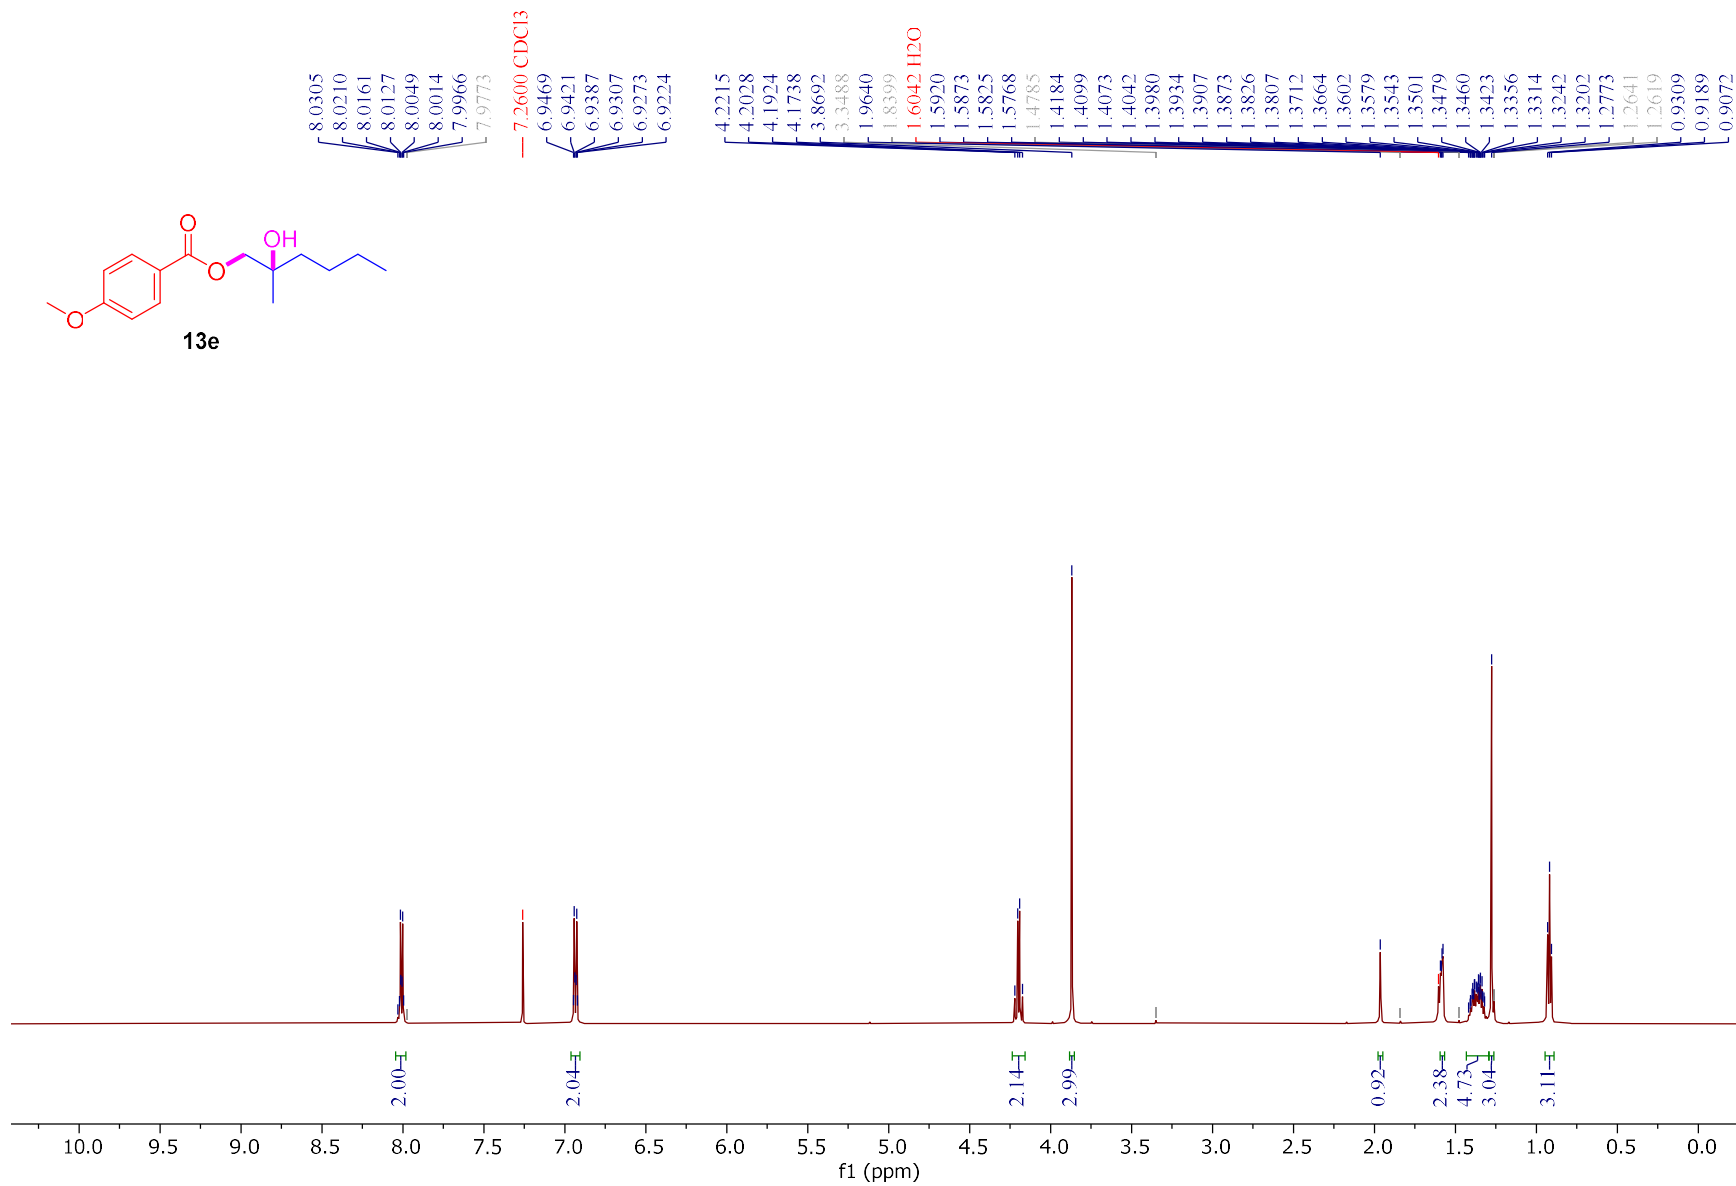

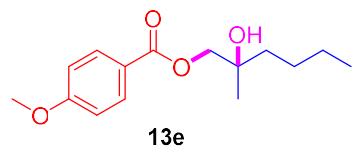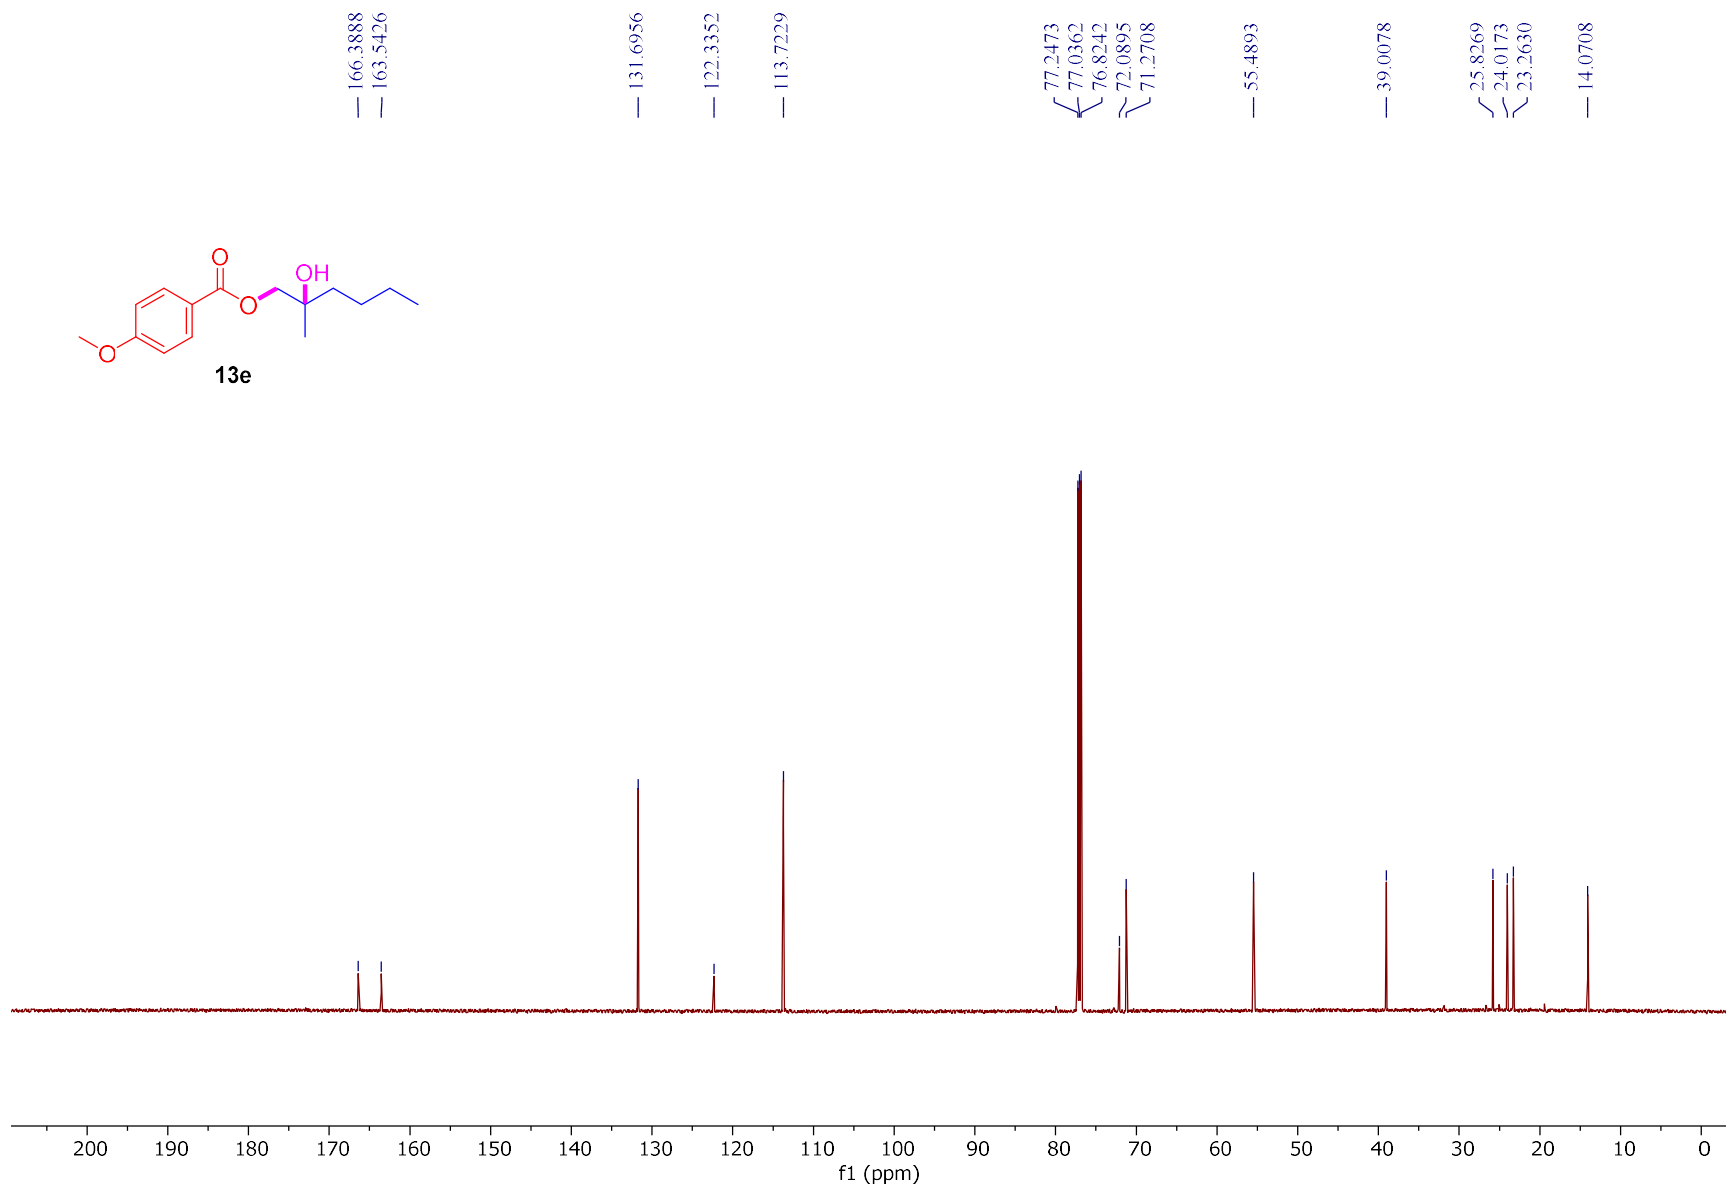

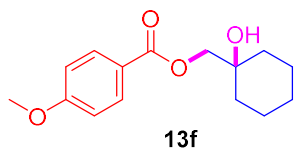

8.0224  
8.0173  
8.0138  
8.0062  
8.0026  
7.9975  
7.9942

7.2599

6.9421  
6.9374  
6.9341  
6.9261  
6.9226  
6.9175

4.2096

3.8681  
1.9063  
1.7029  
1.6893  
1.6837  
1.6785  
1.6739  
1.6648  
1.6585  
1.6478  
1.6432  
1.6400  
1.6306  
1.6178  
1.6052  
1.5976  
1.5918  
1.5855  
1.5681  
1.5525  
1.5450  
1.5371  
1.5301  
1.5184  
1.5116  
1.5056  
1.3339  
1.3293  
1.3129  
1.2498

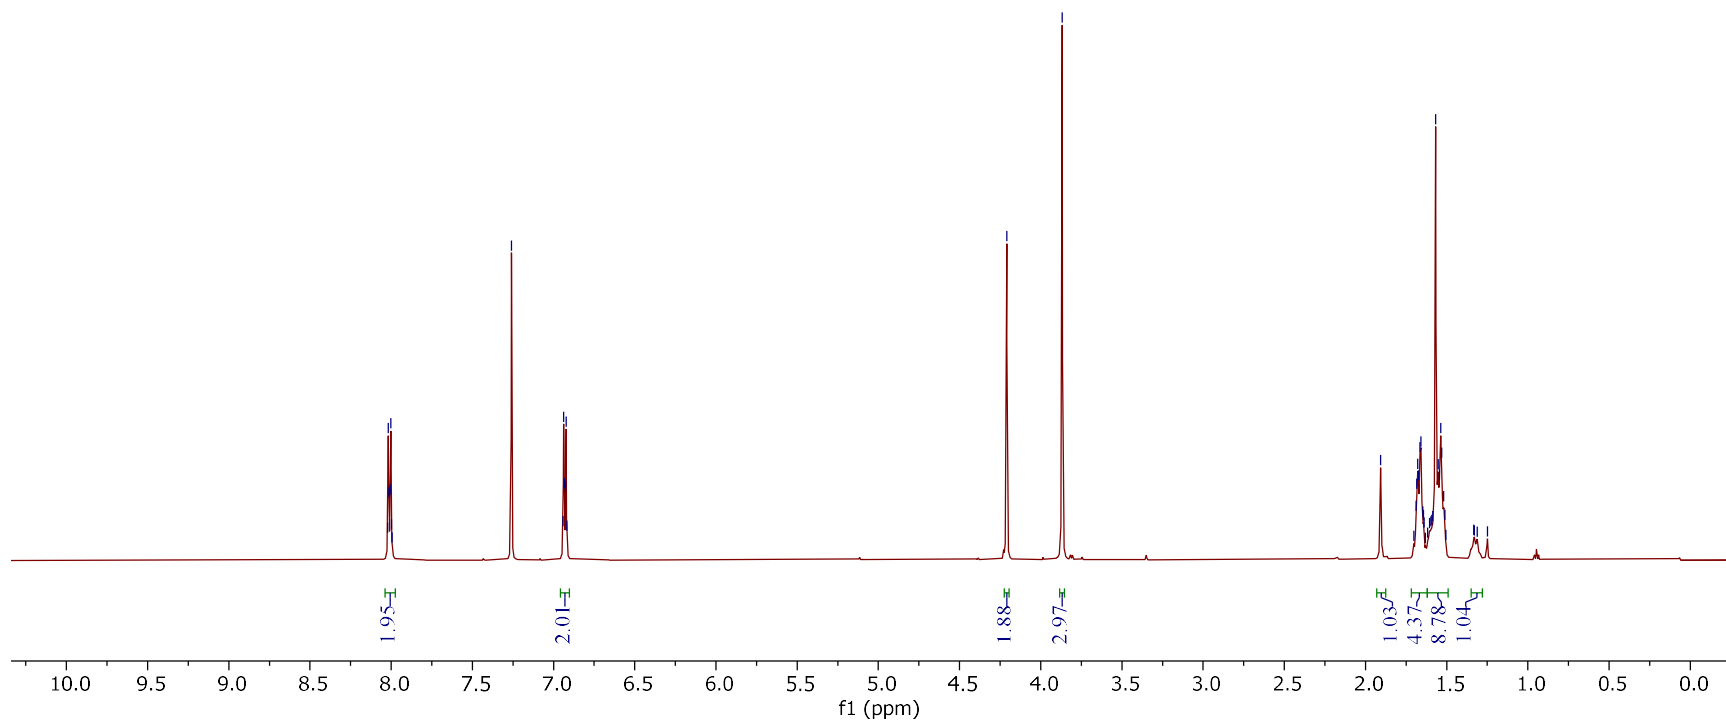



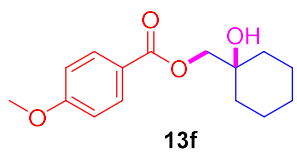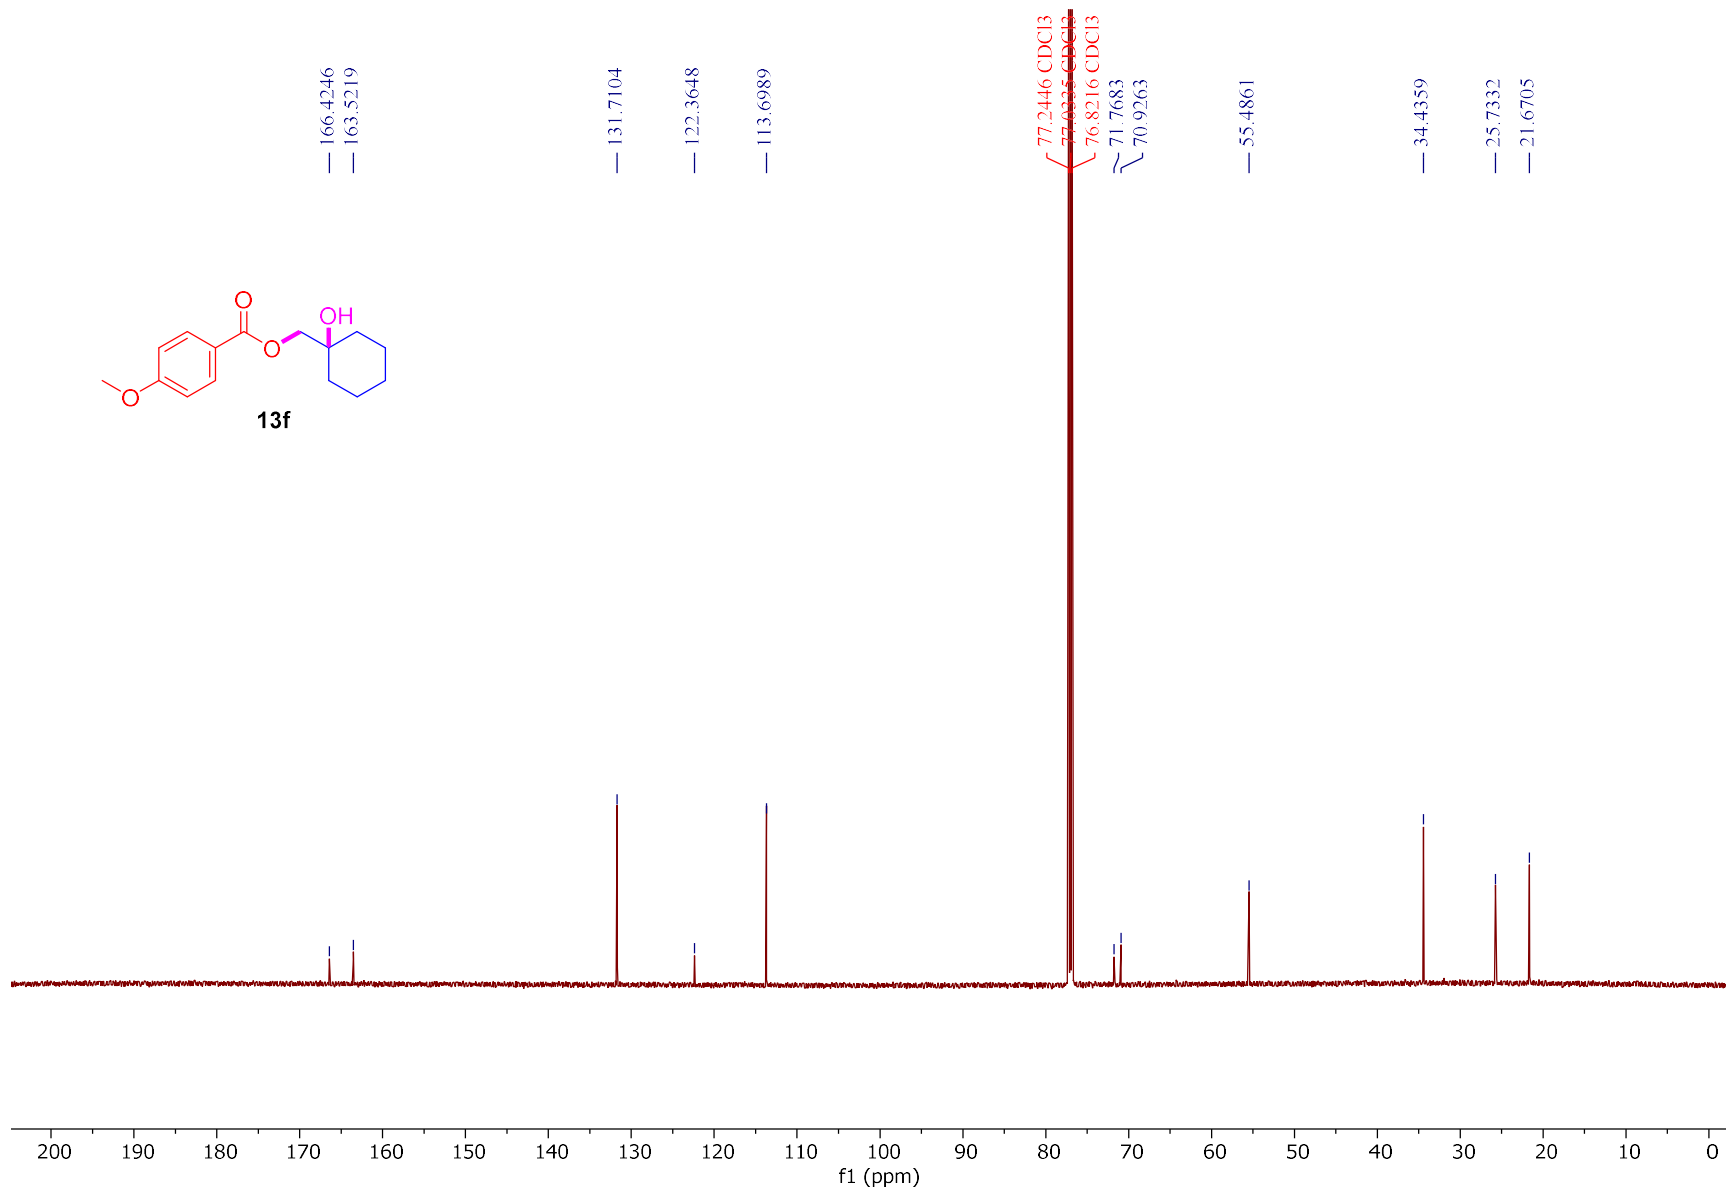

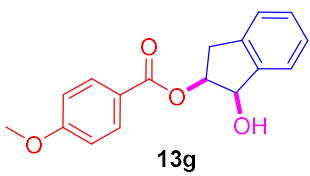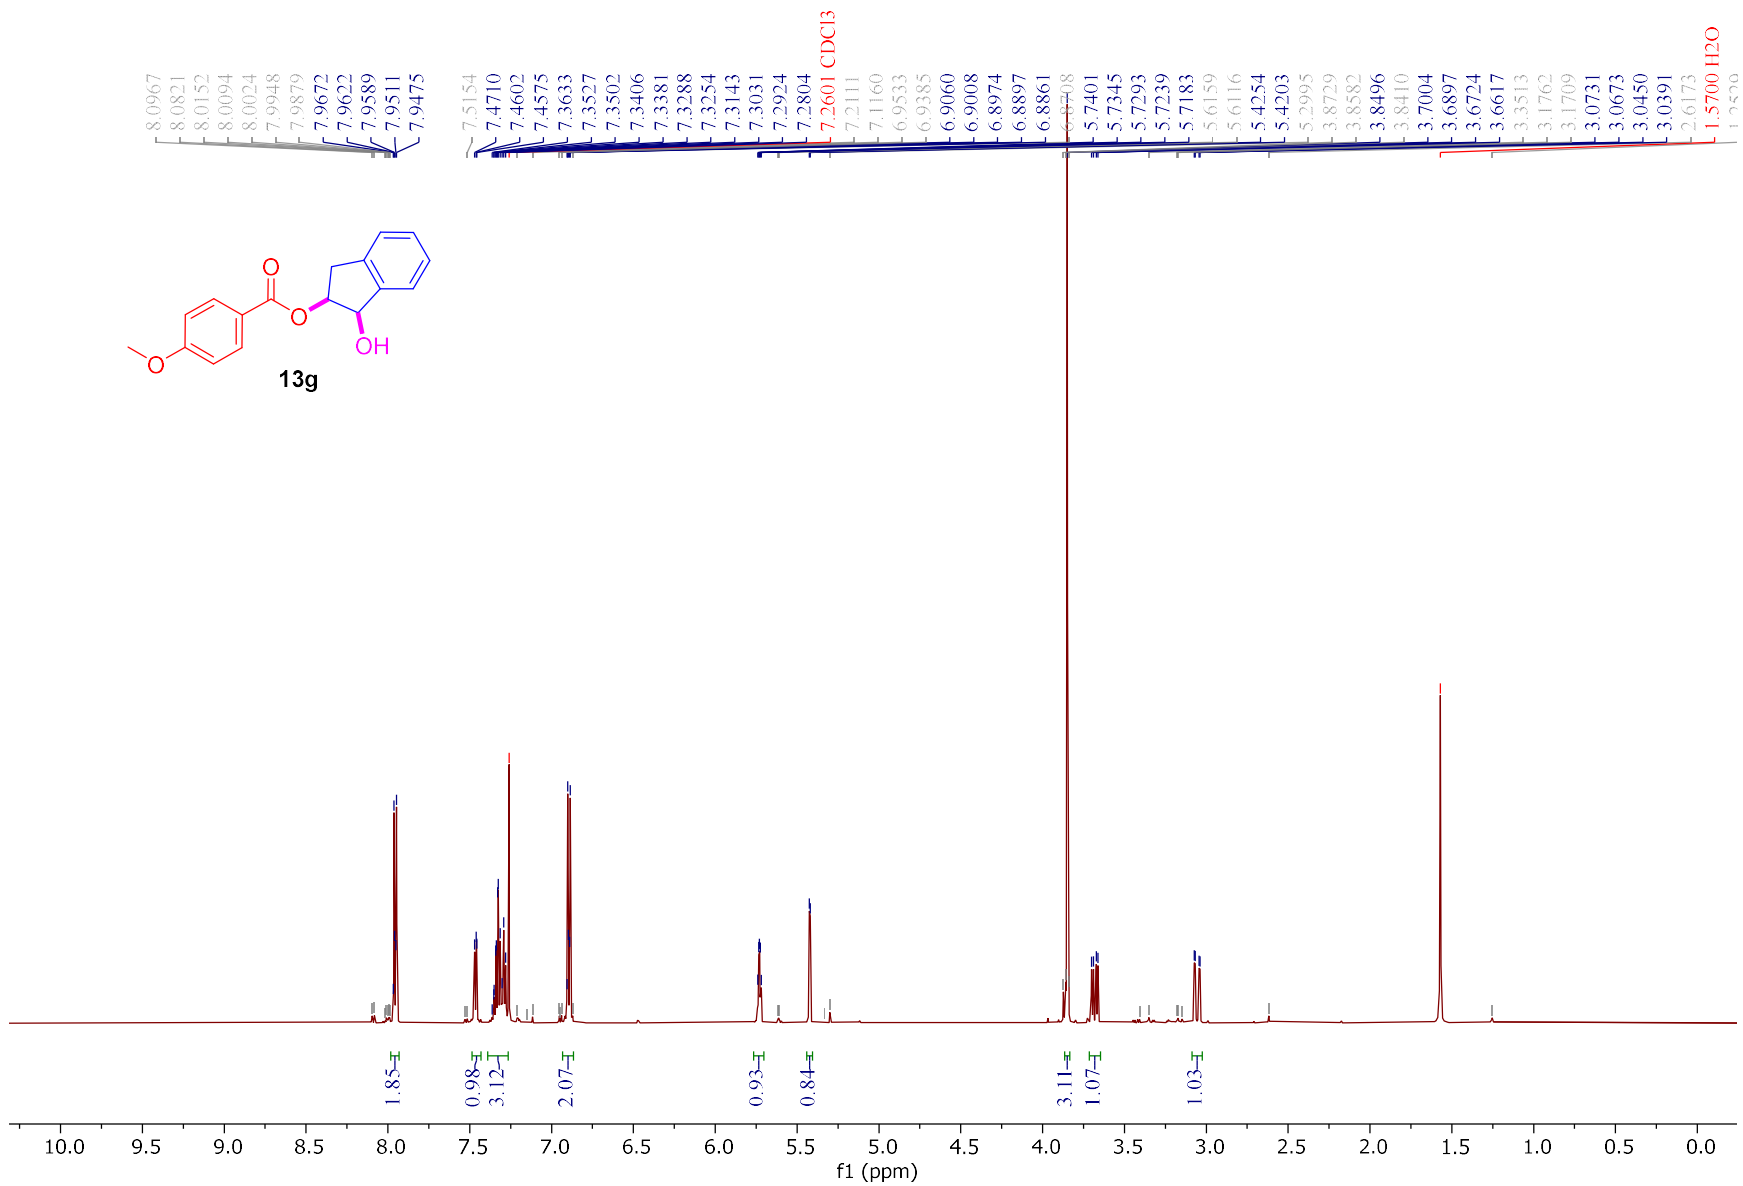

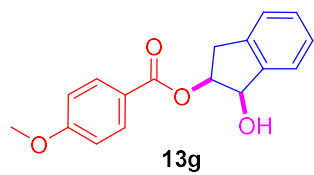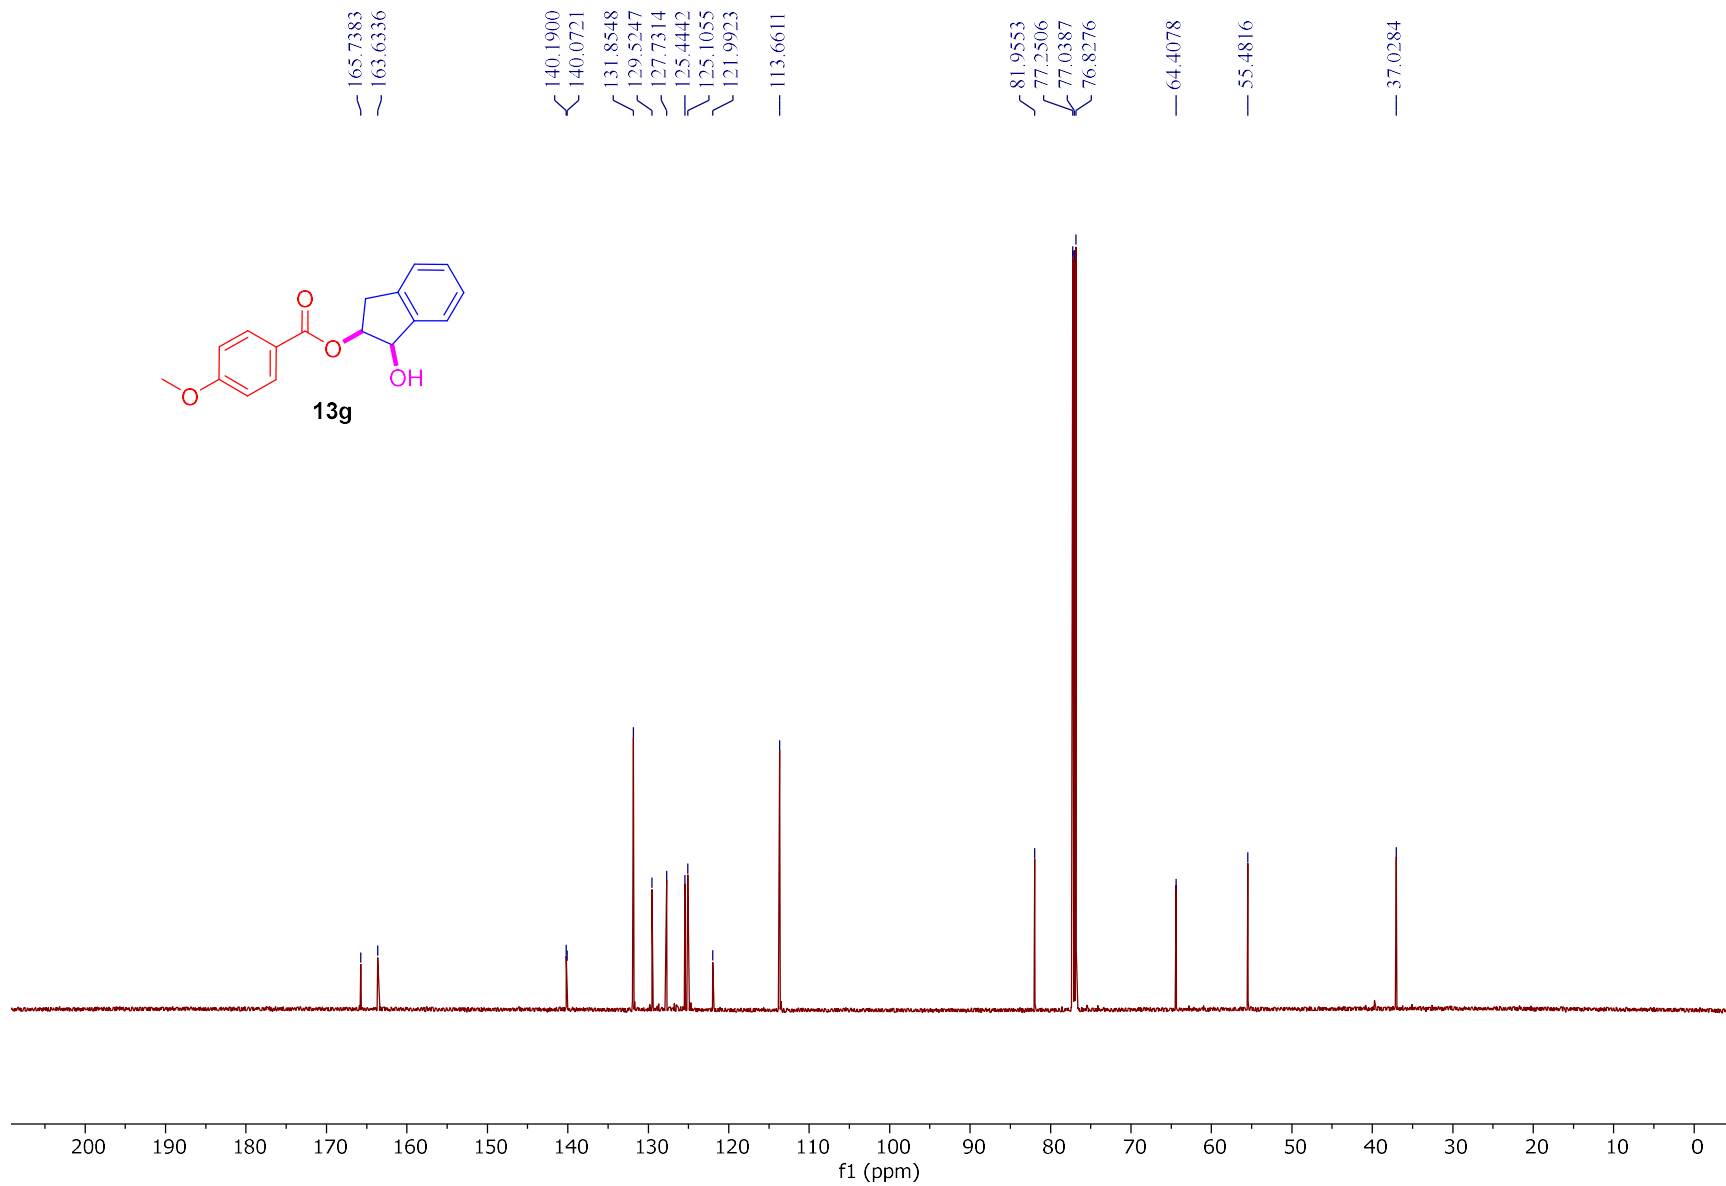

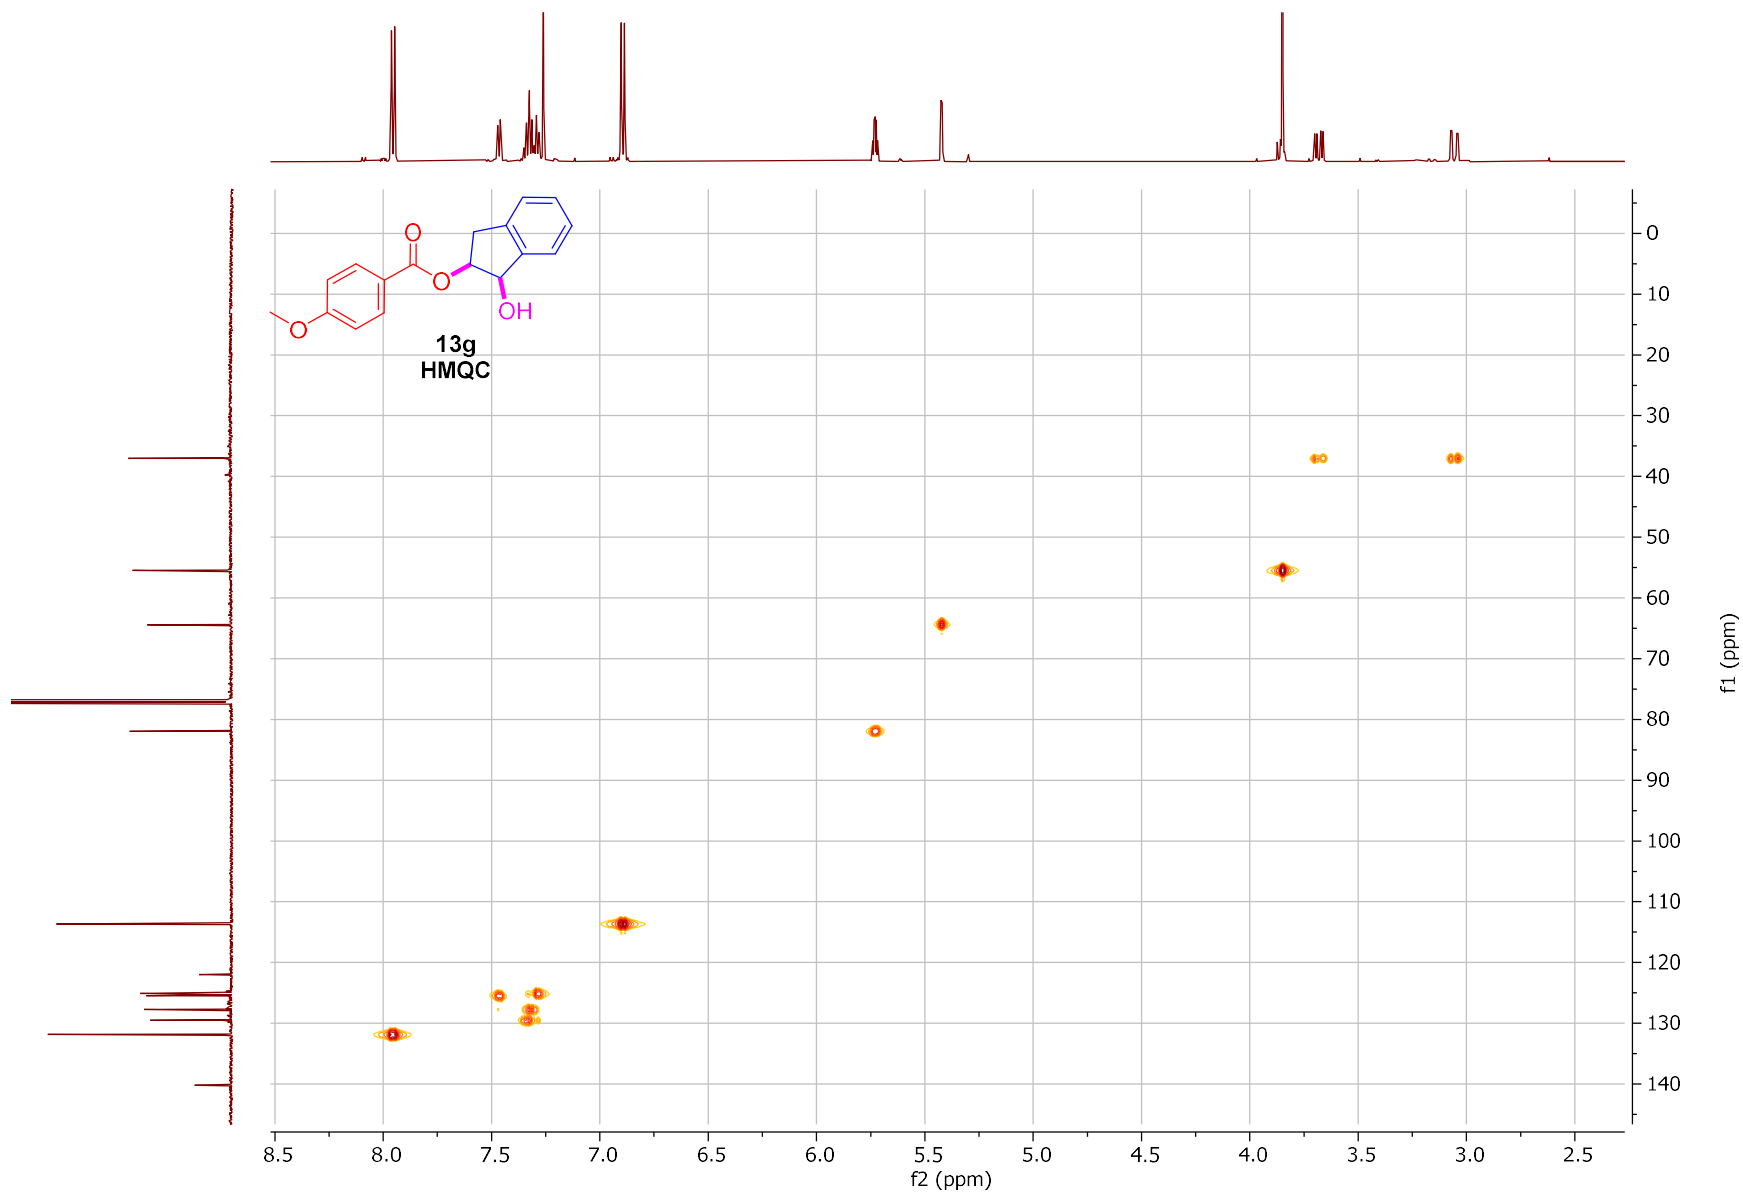

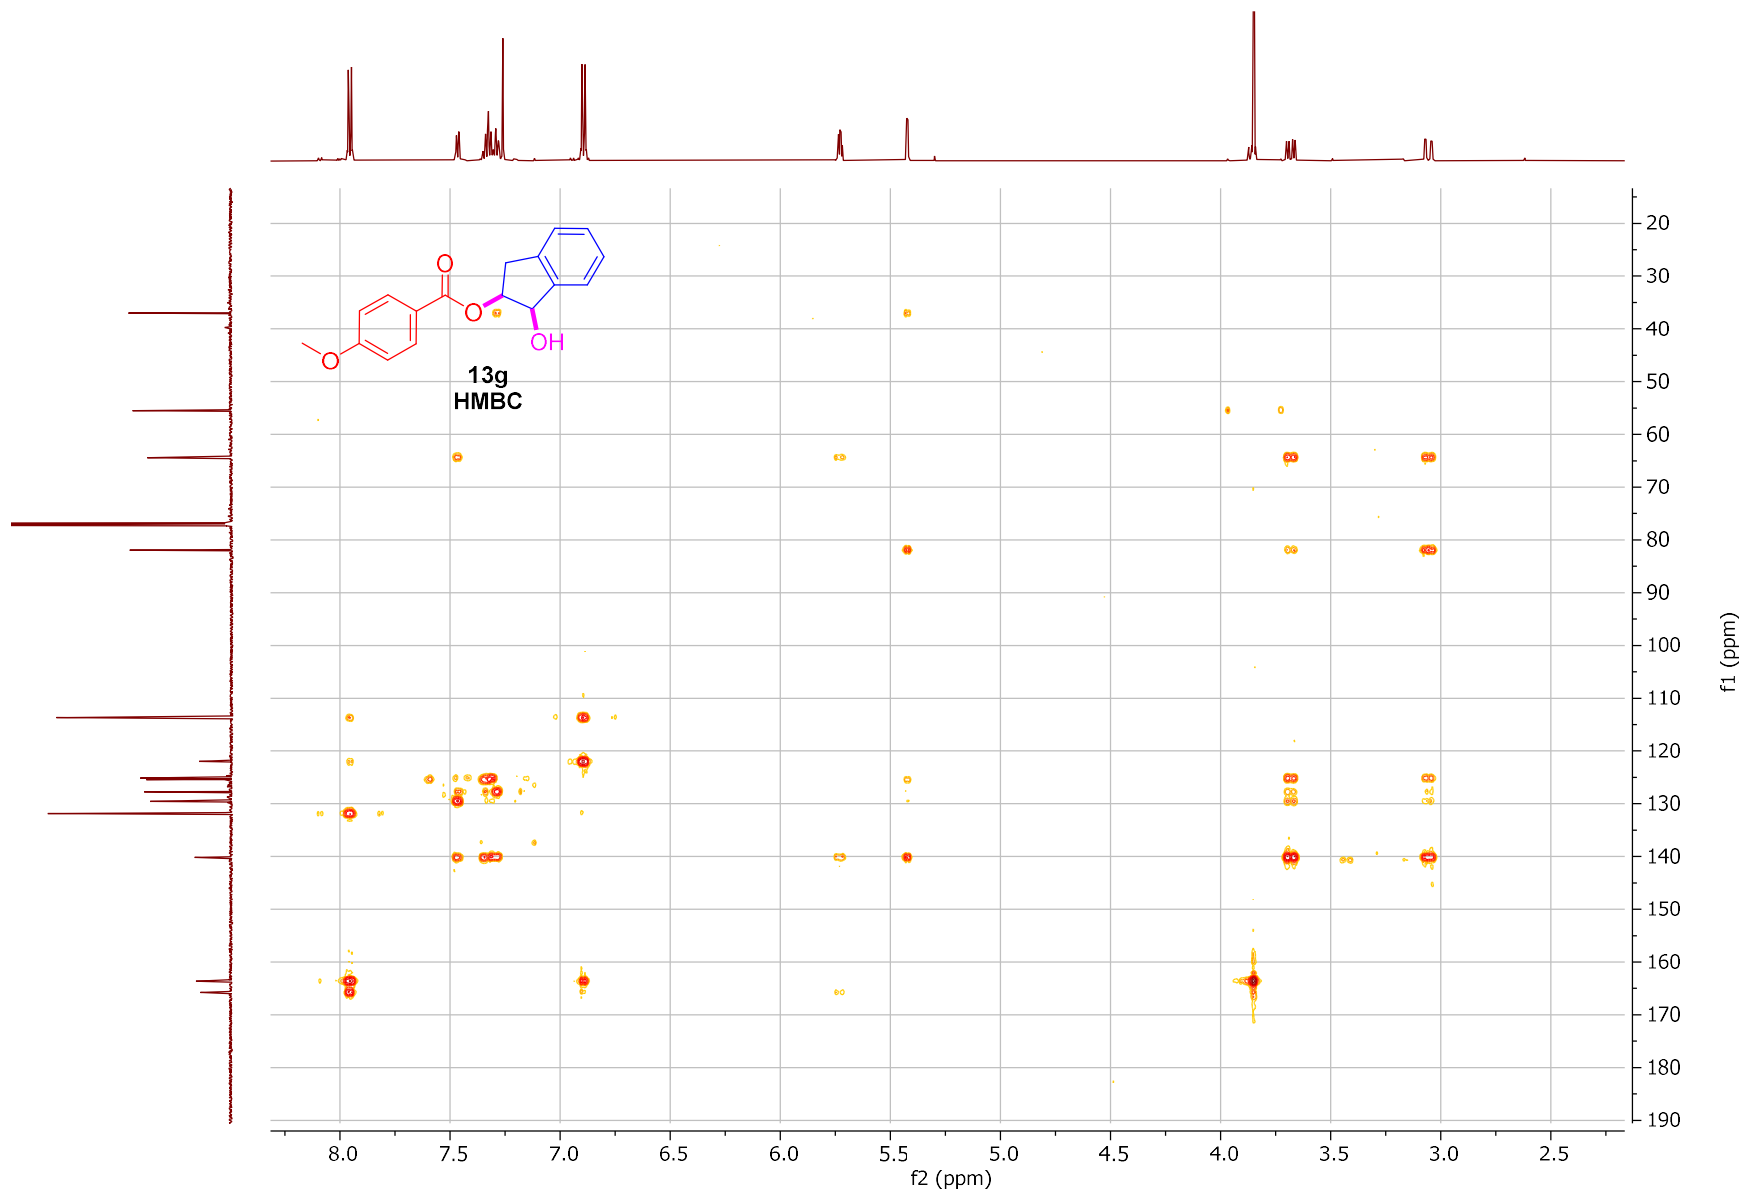

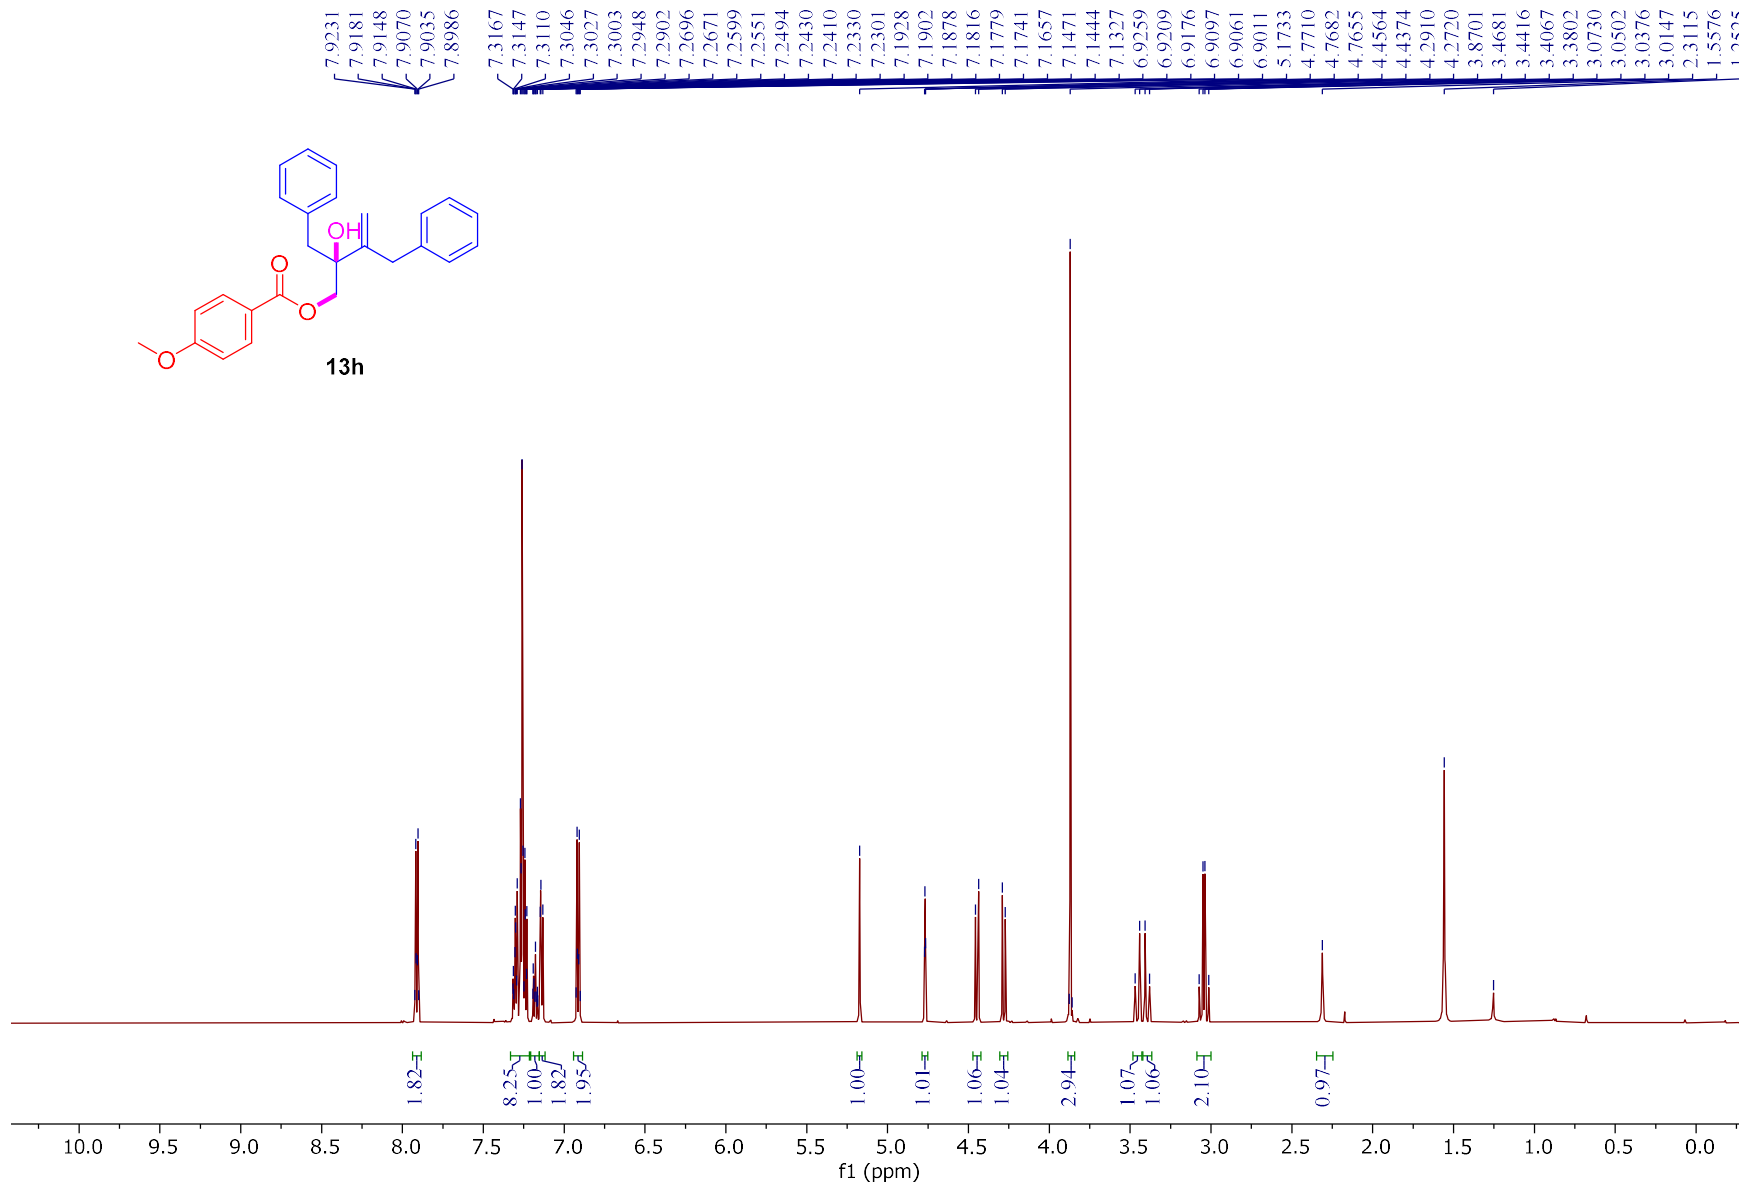

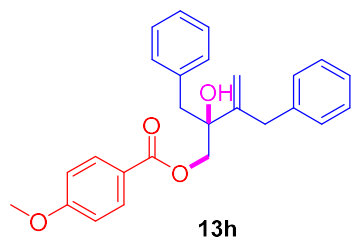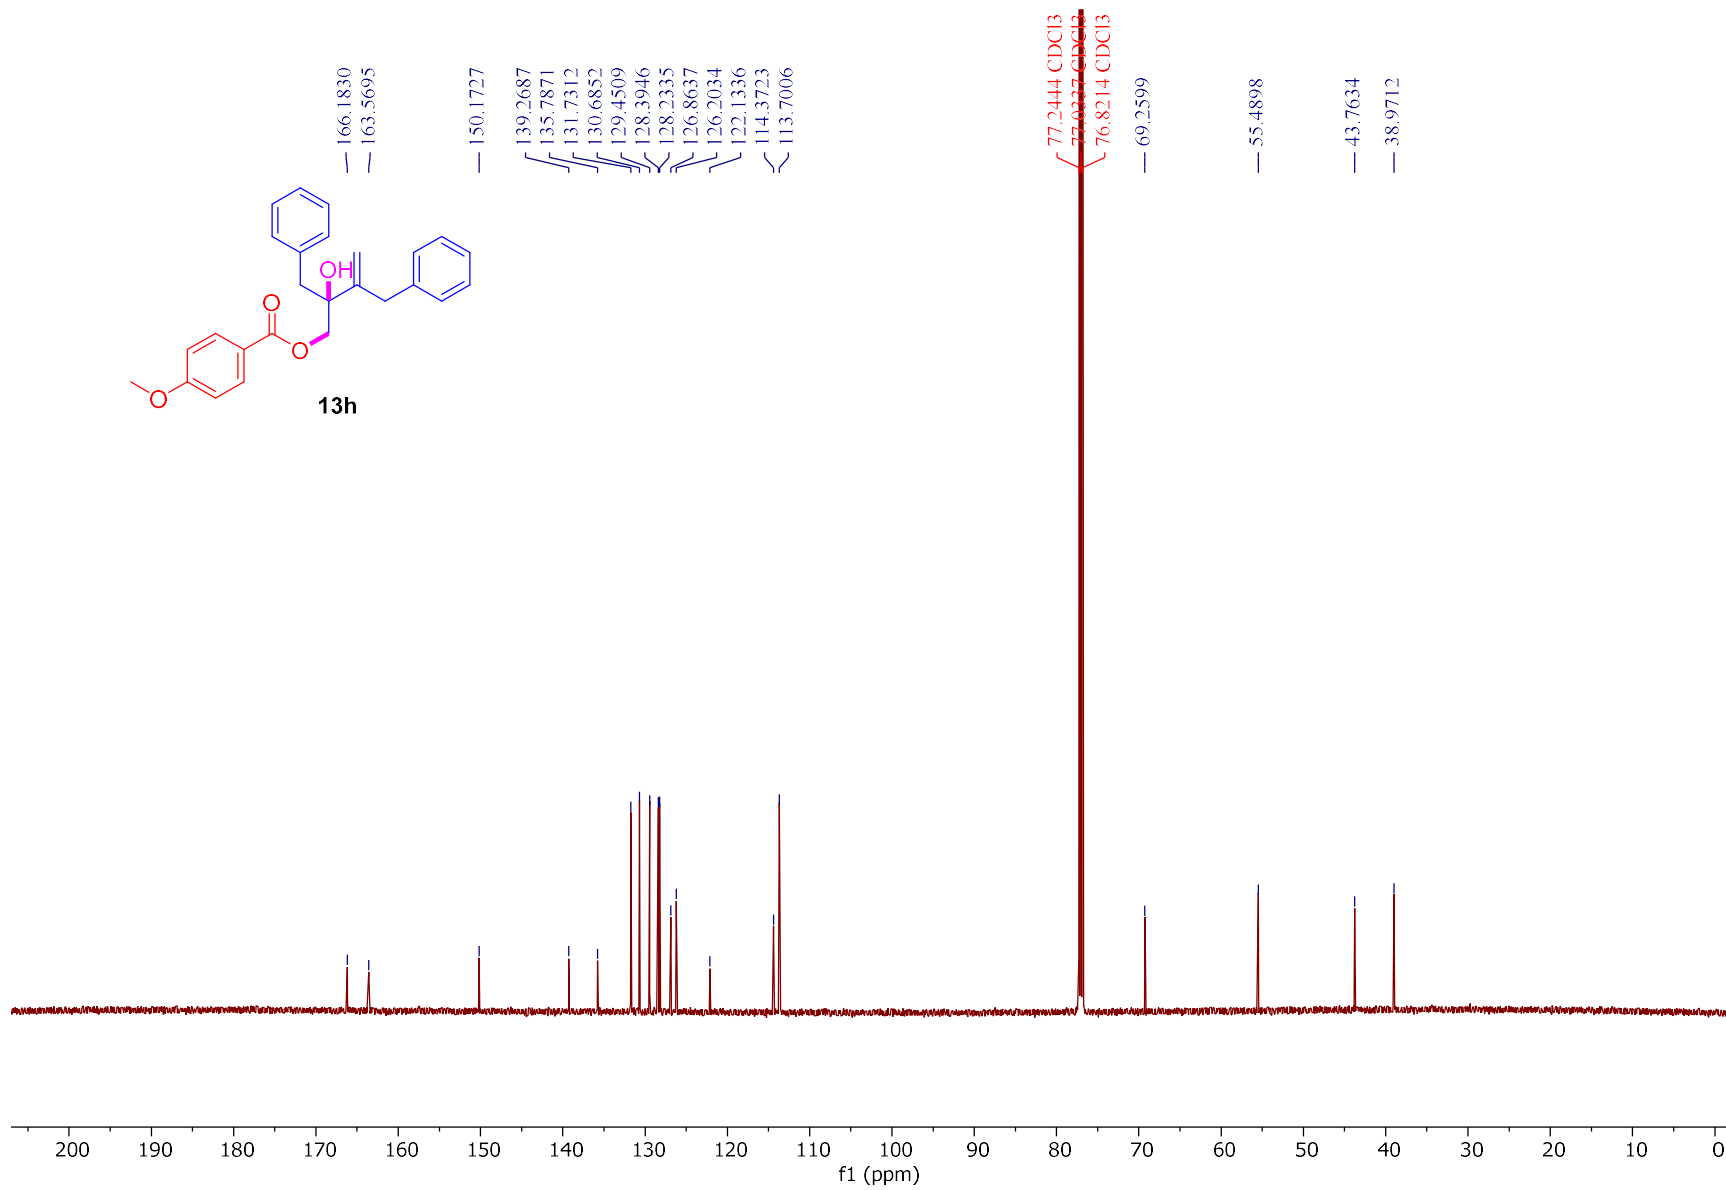

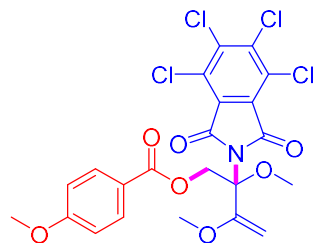

14a

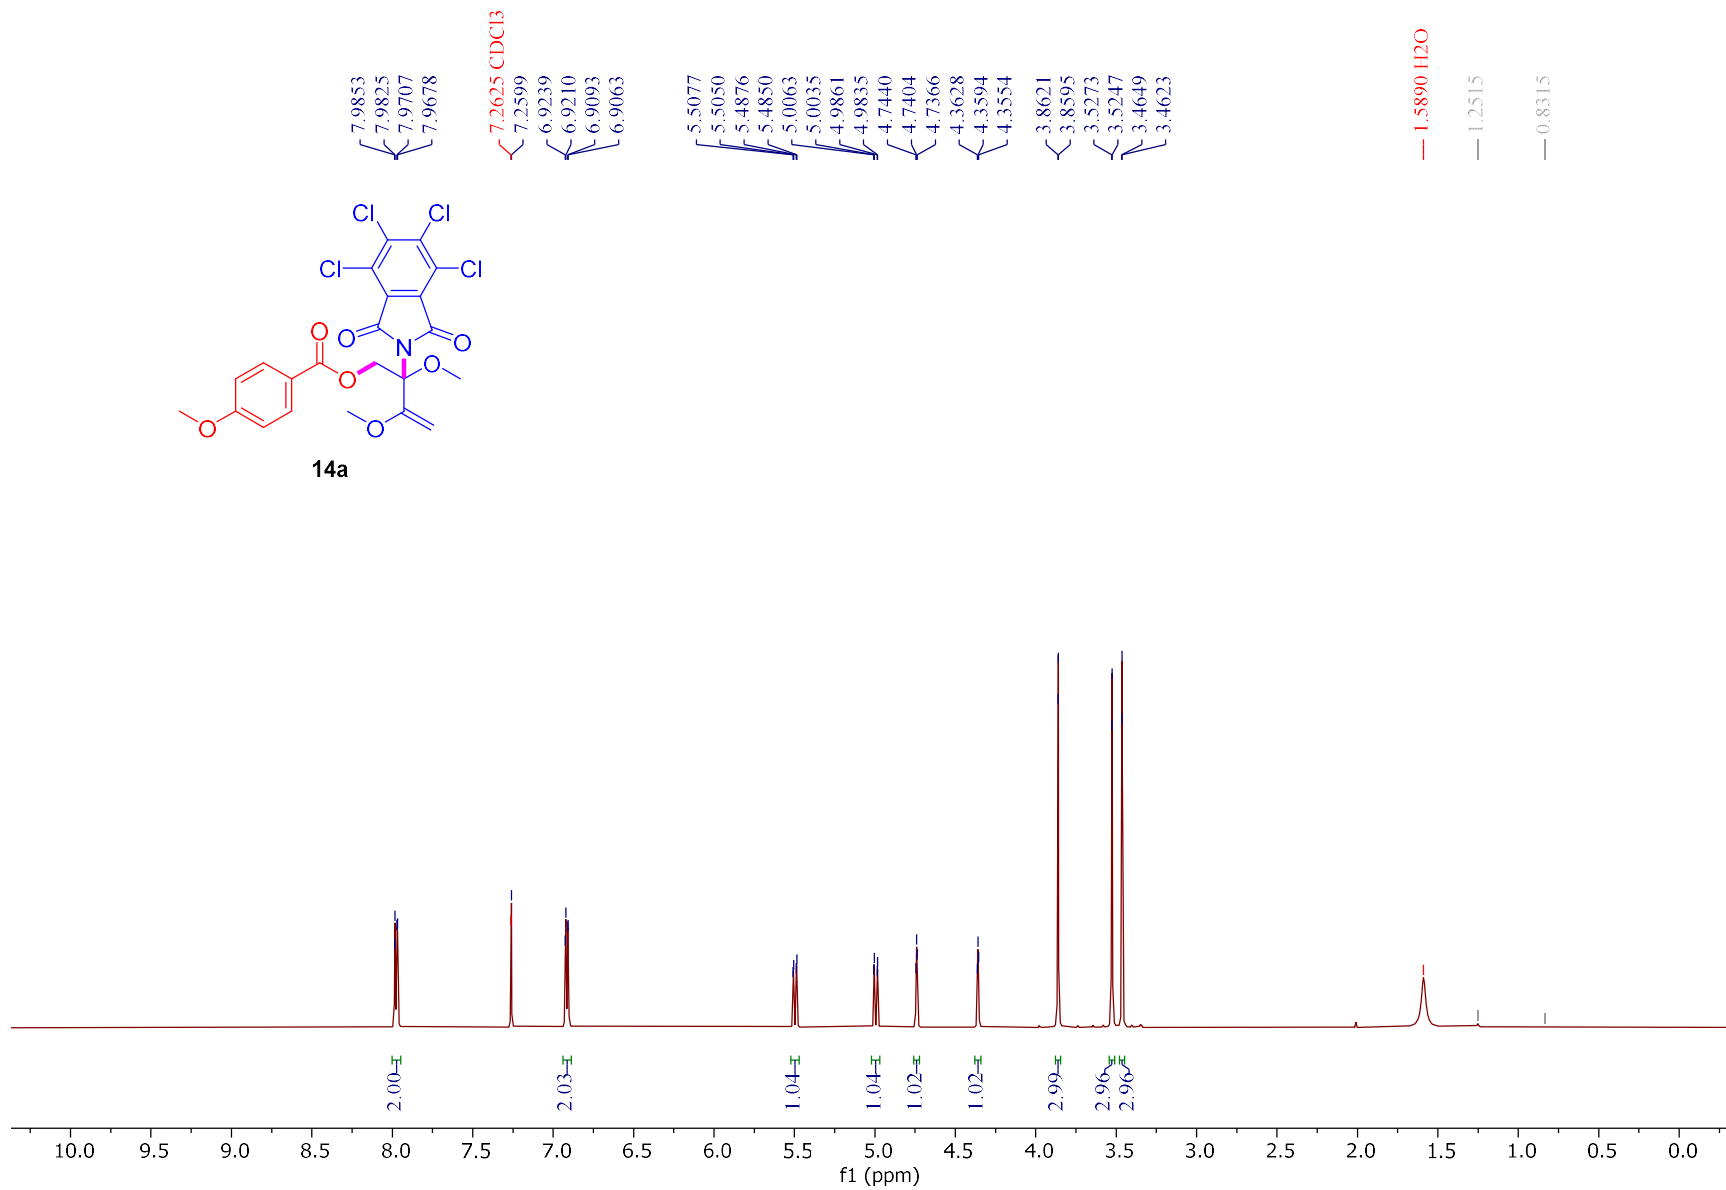



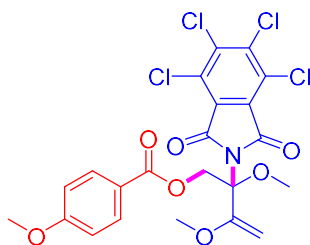

14a

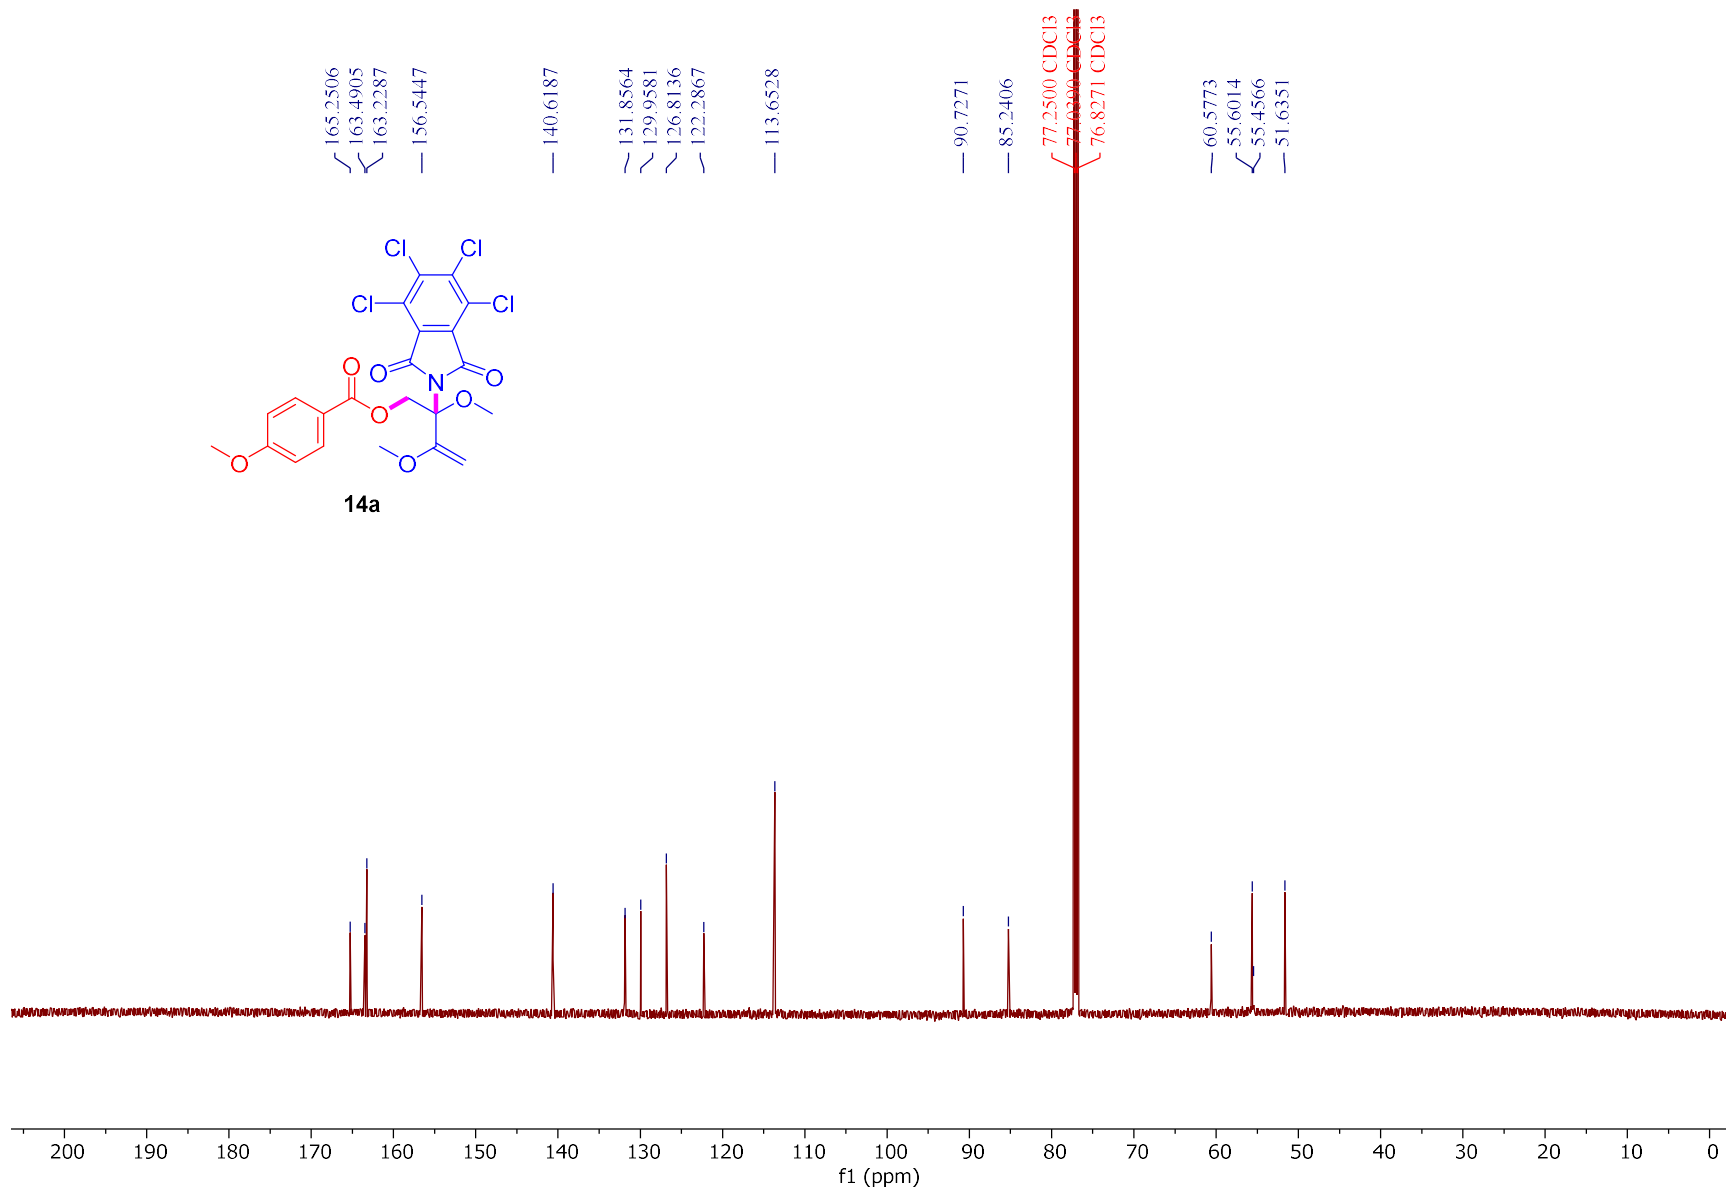

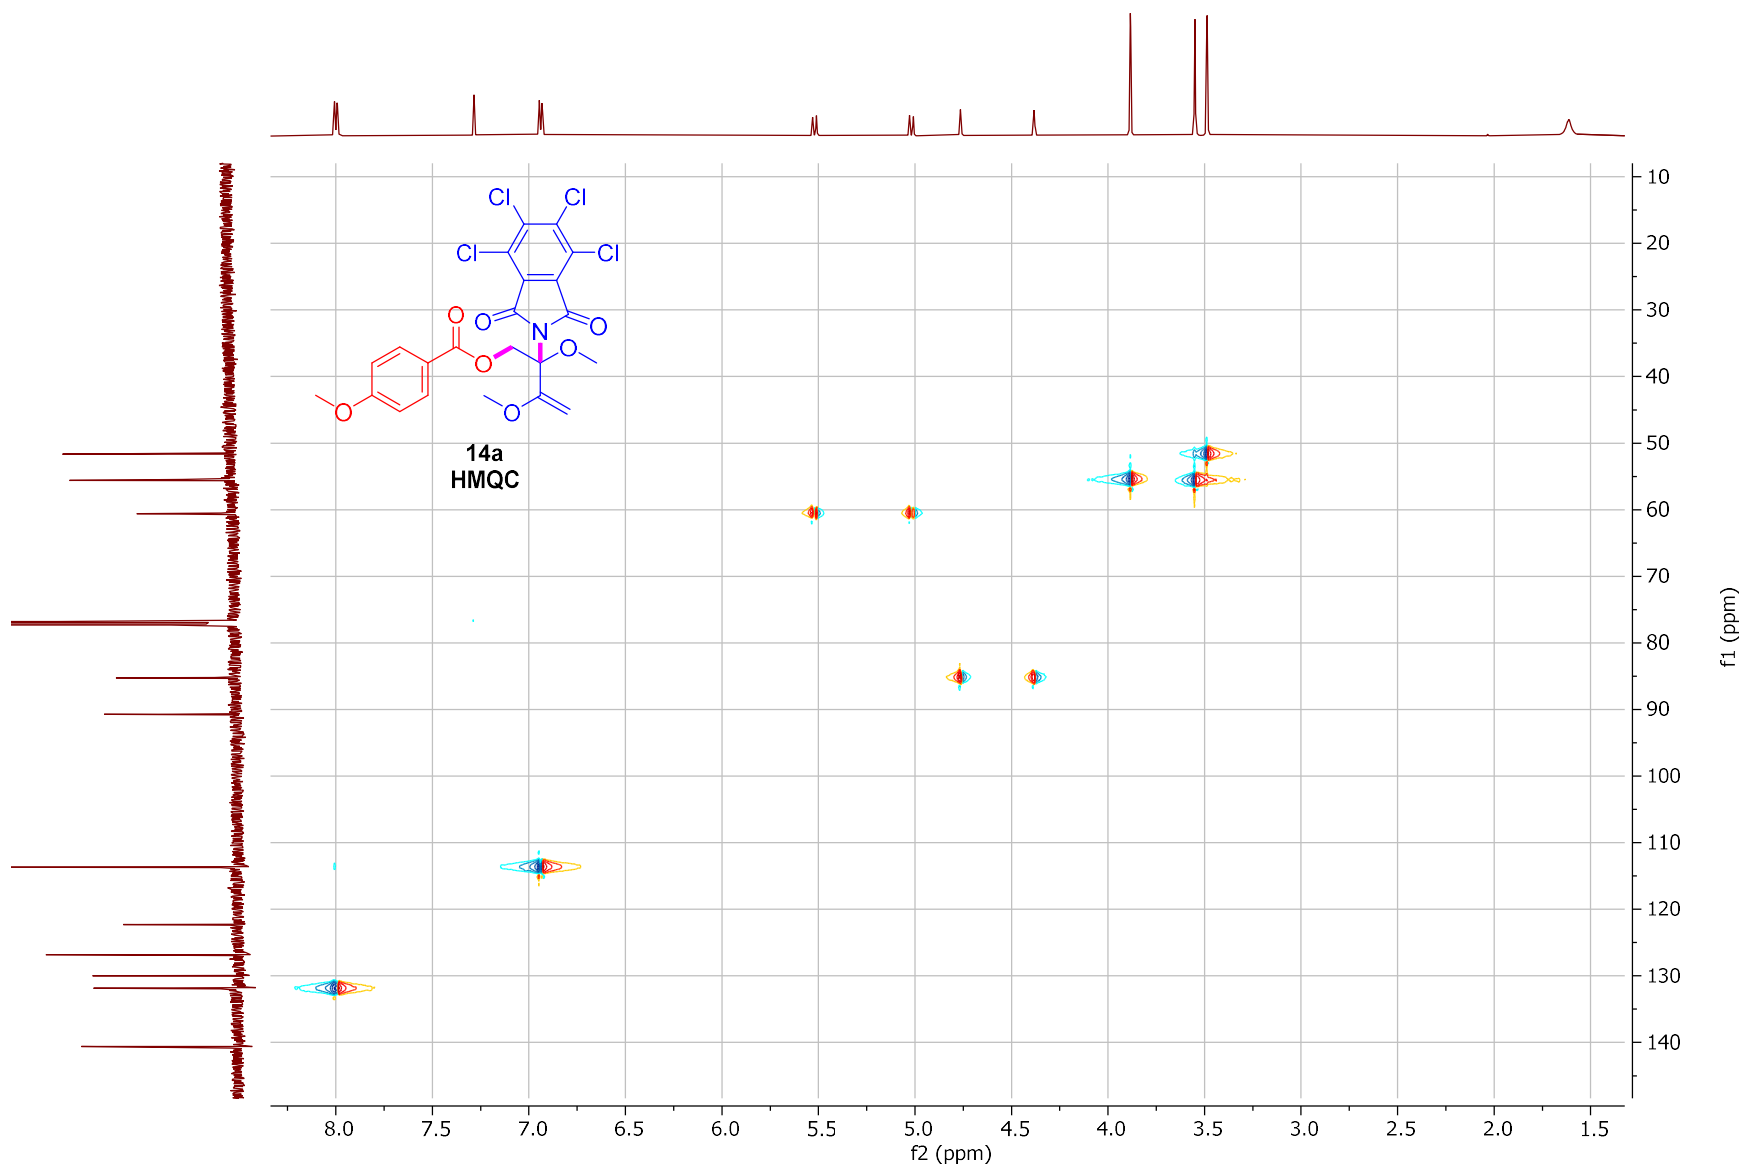



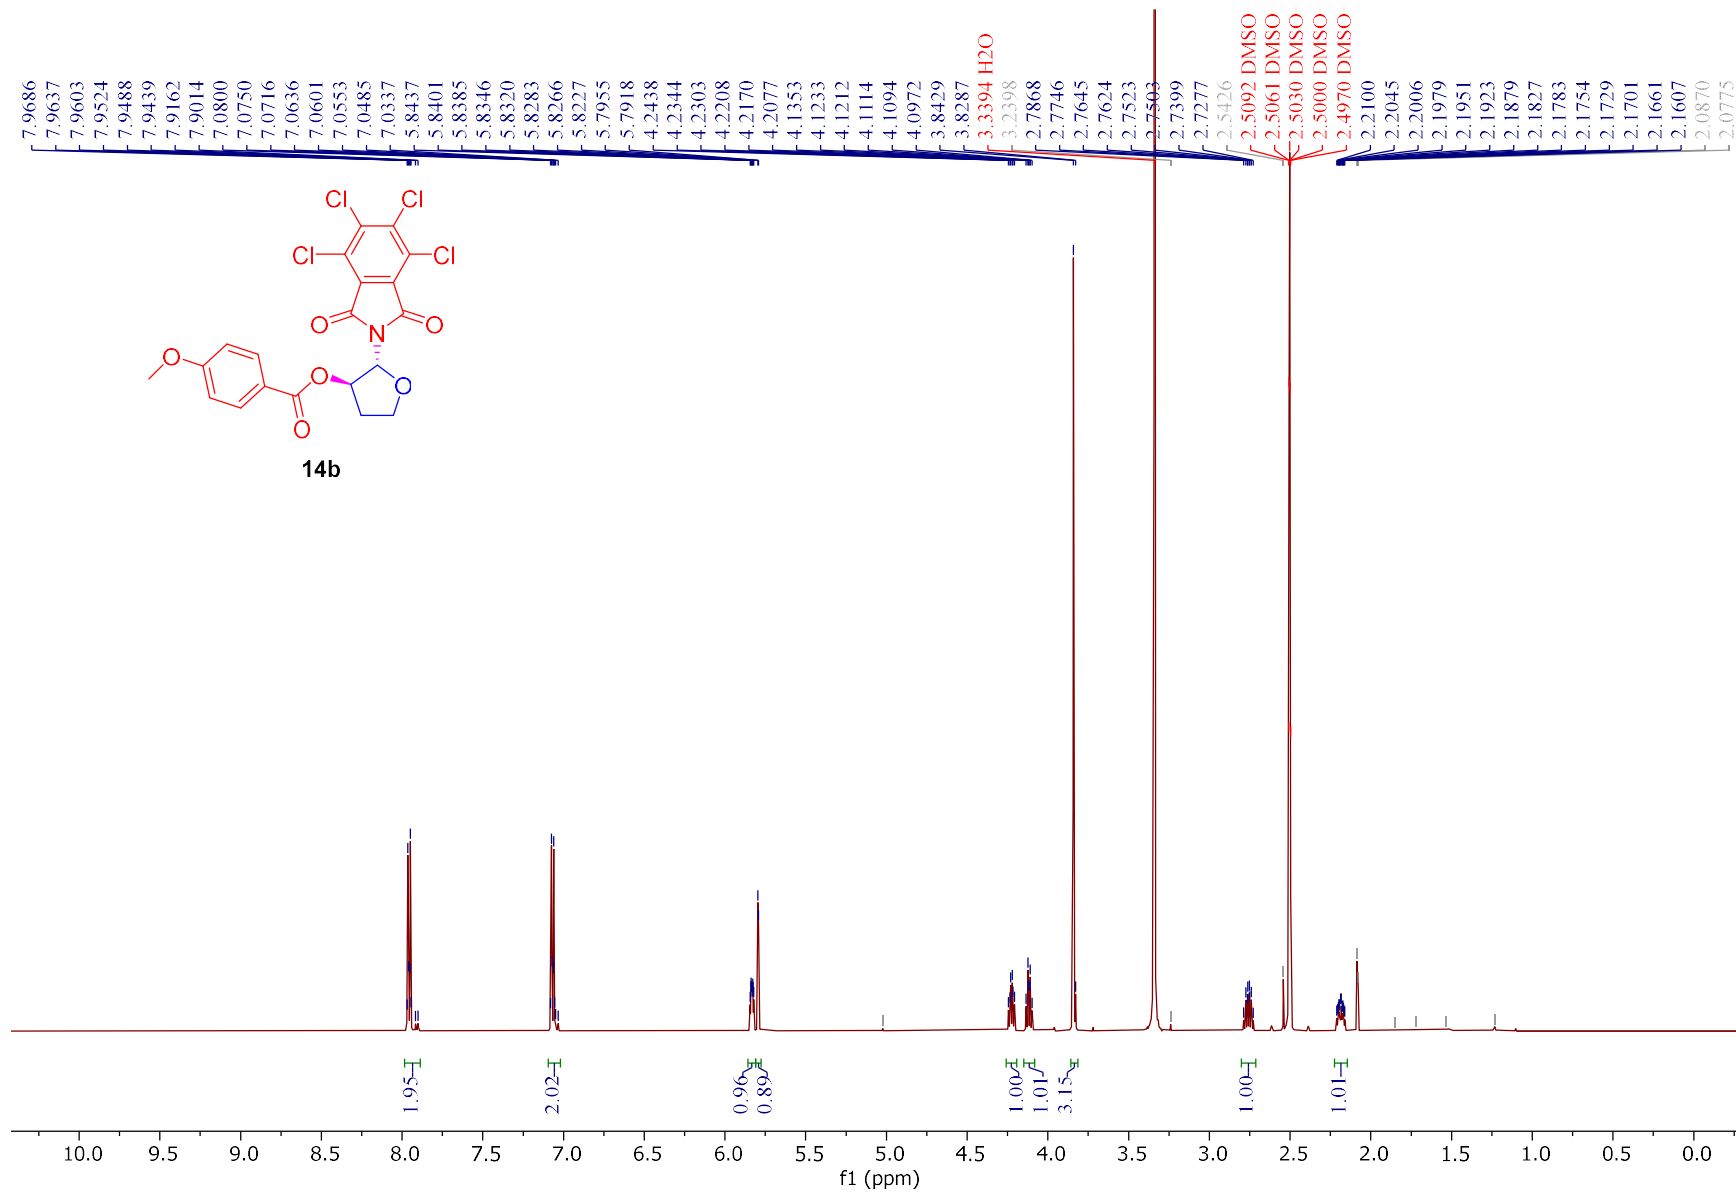

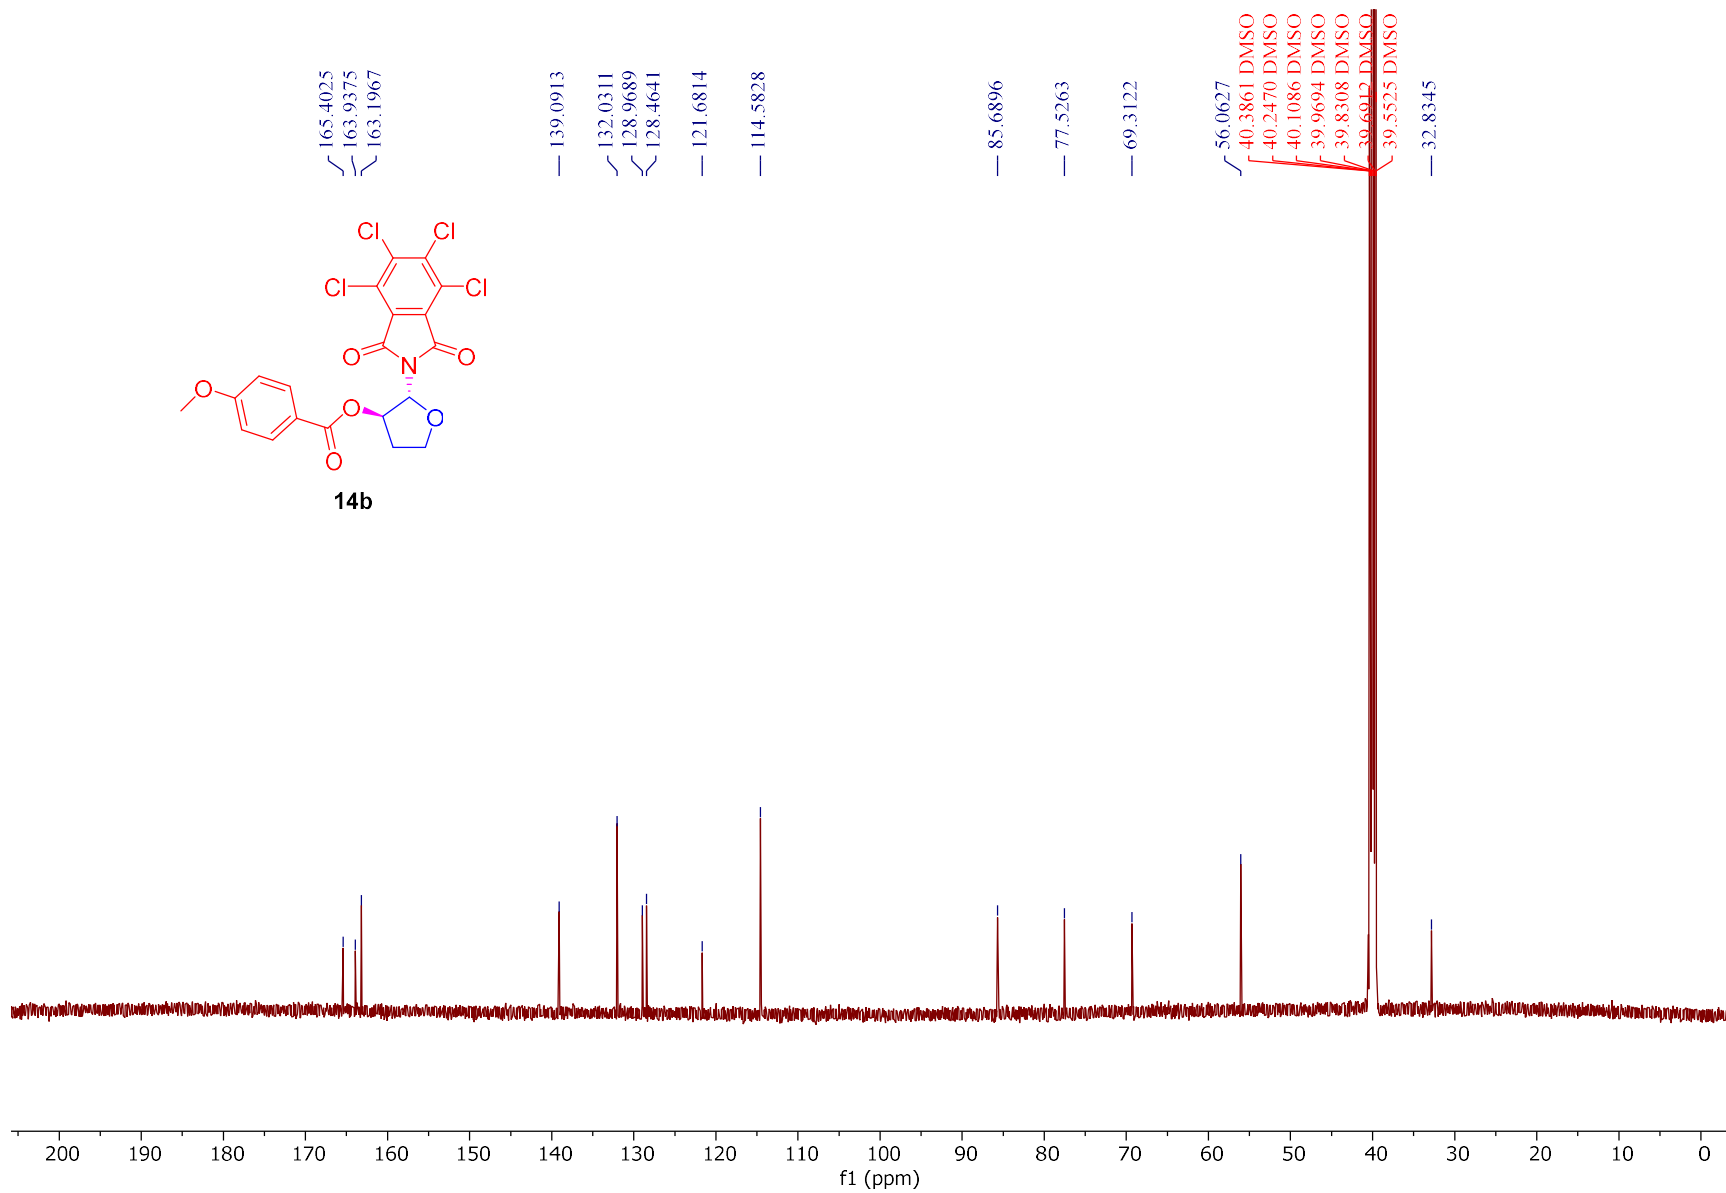

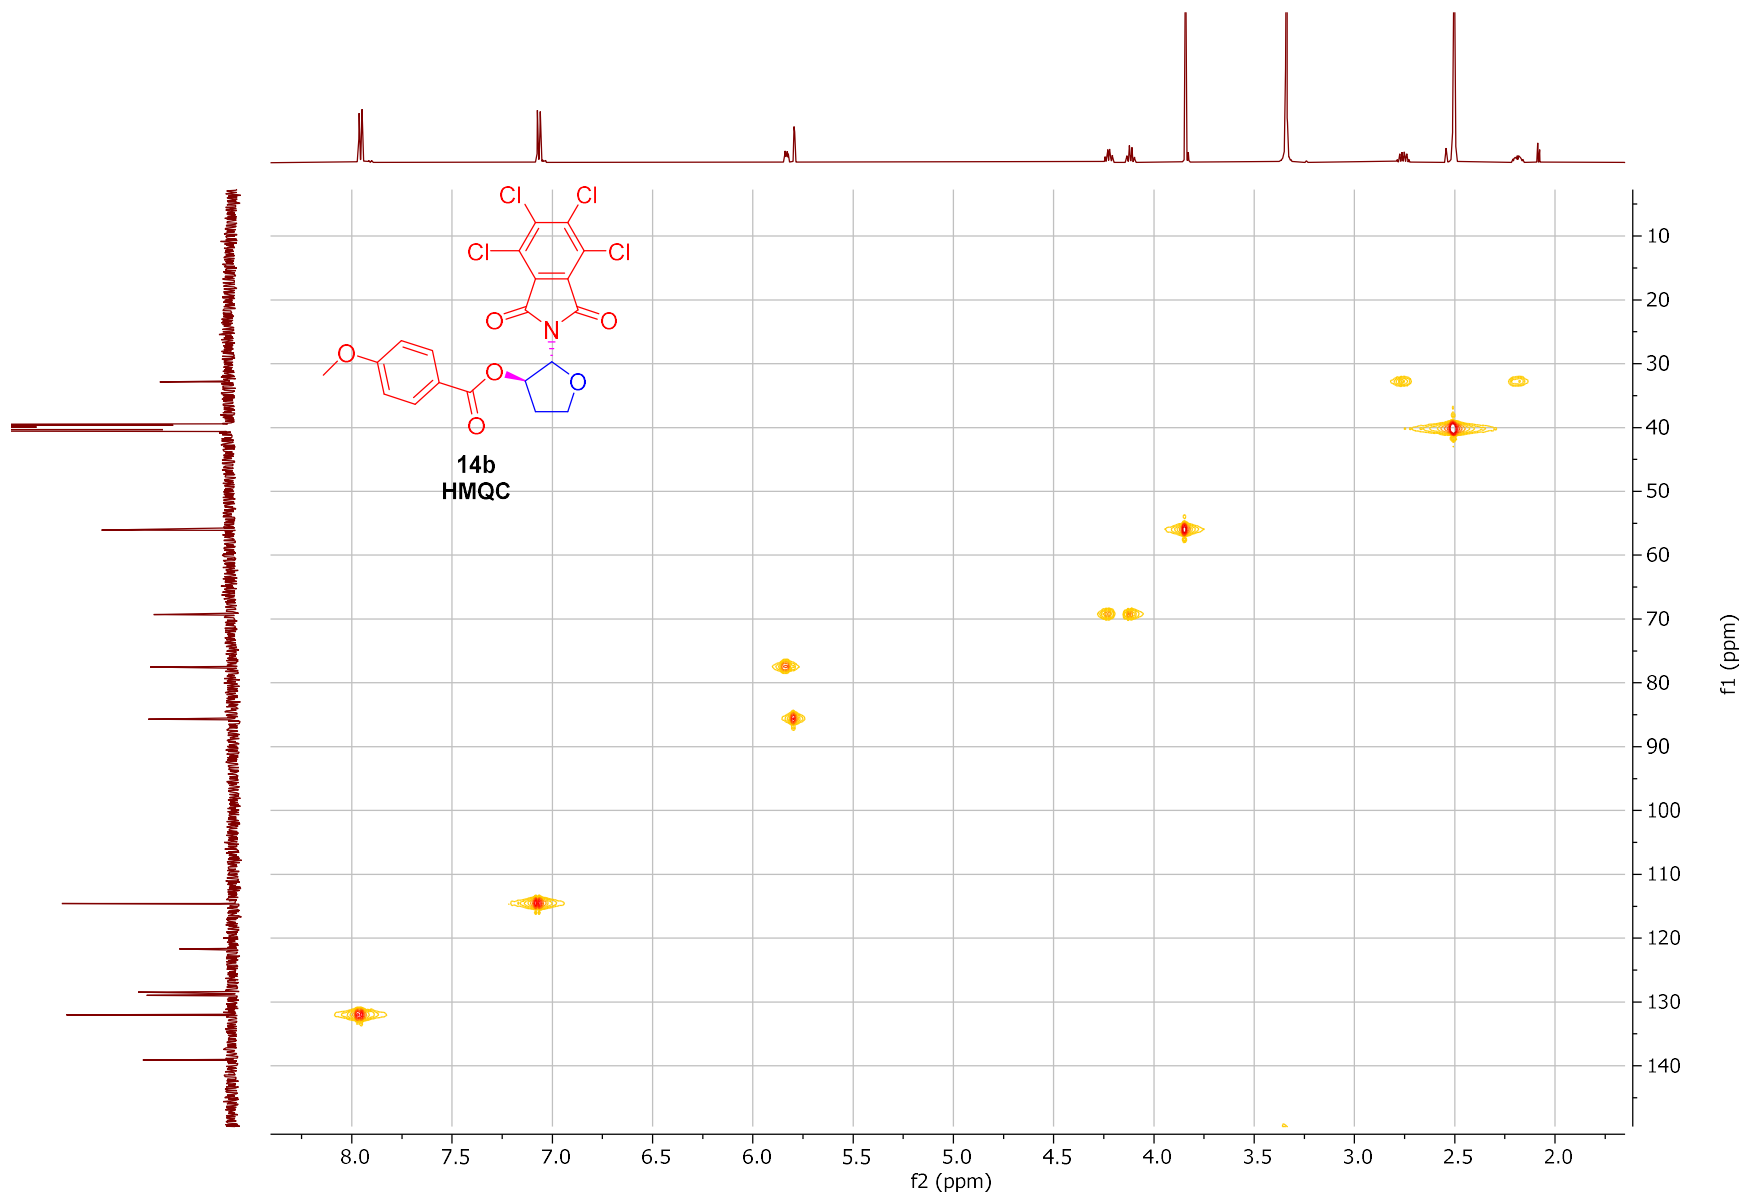

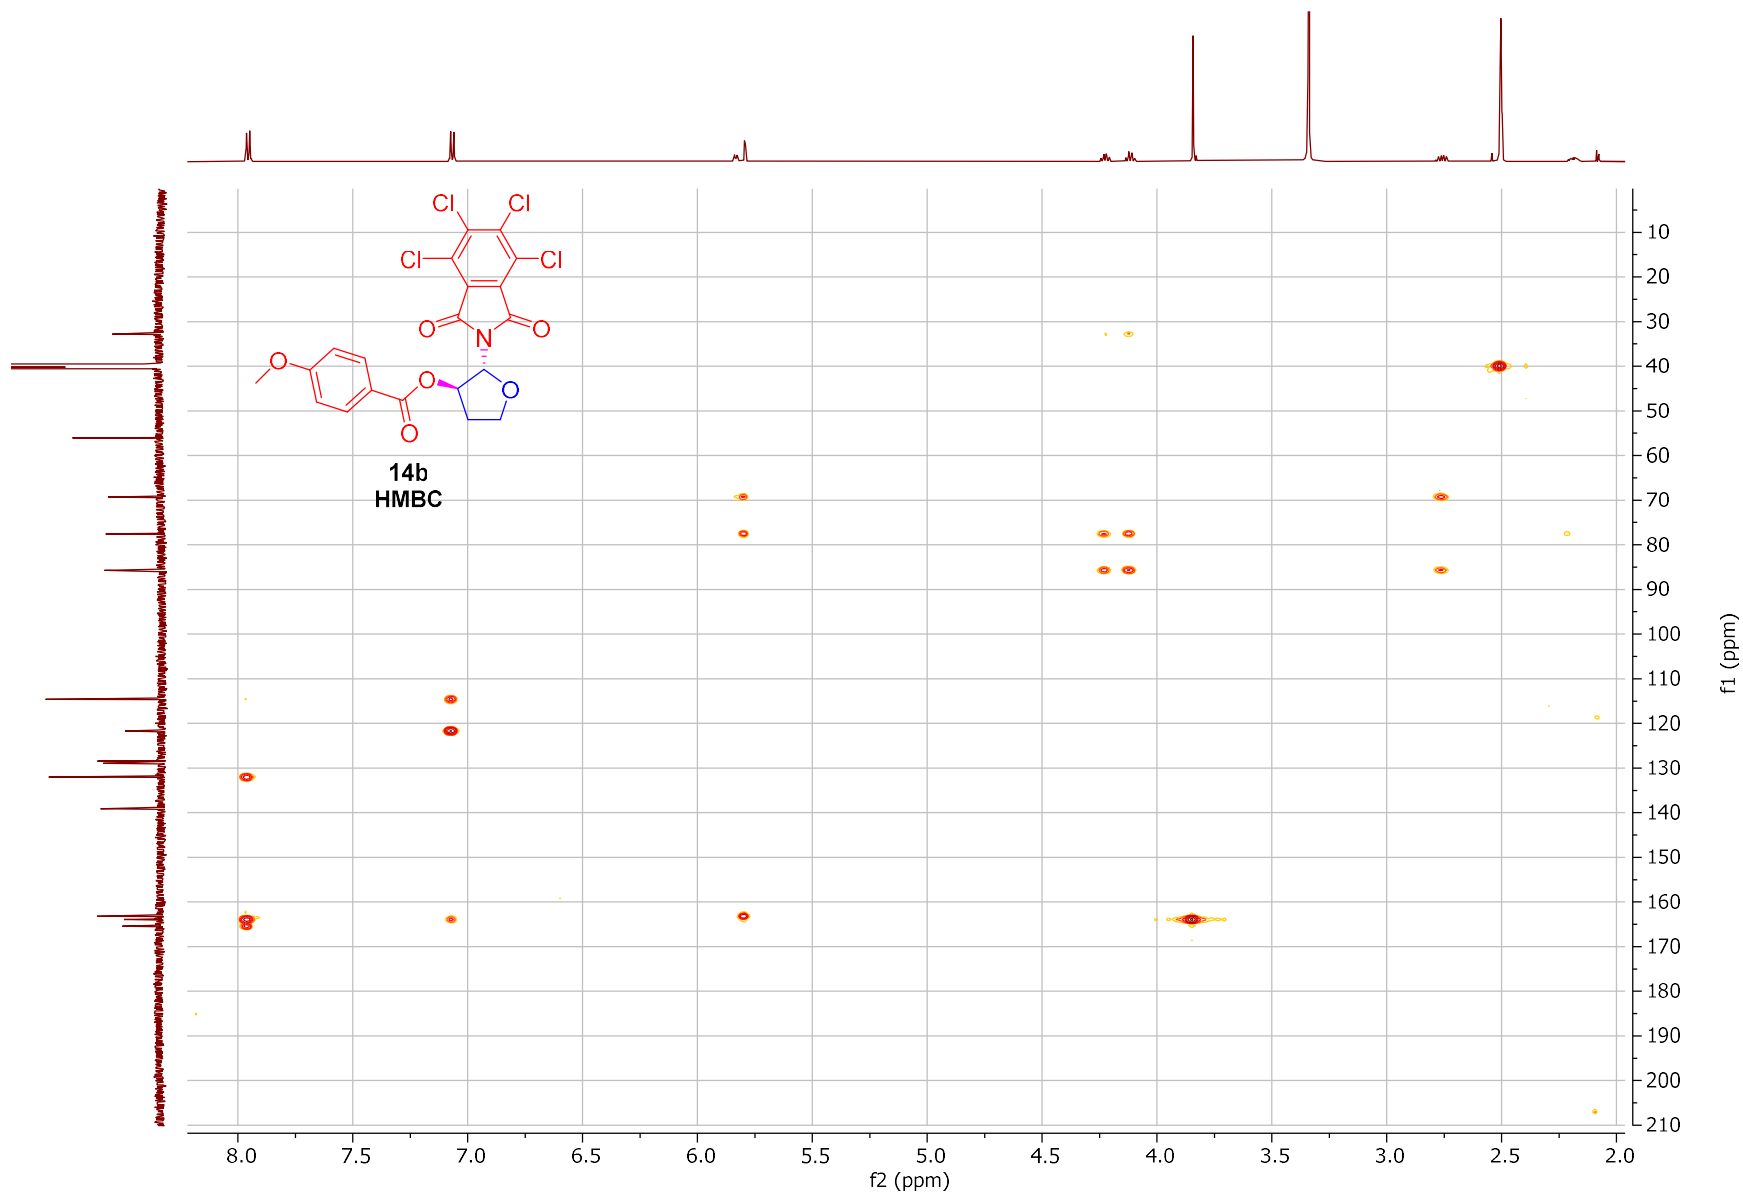

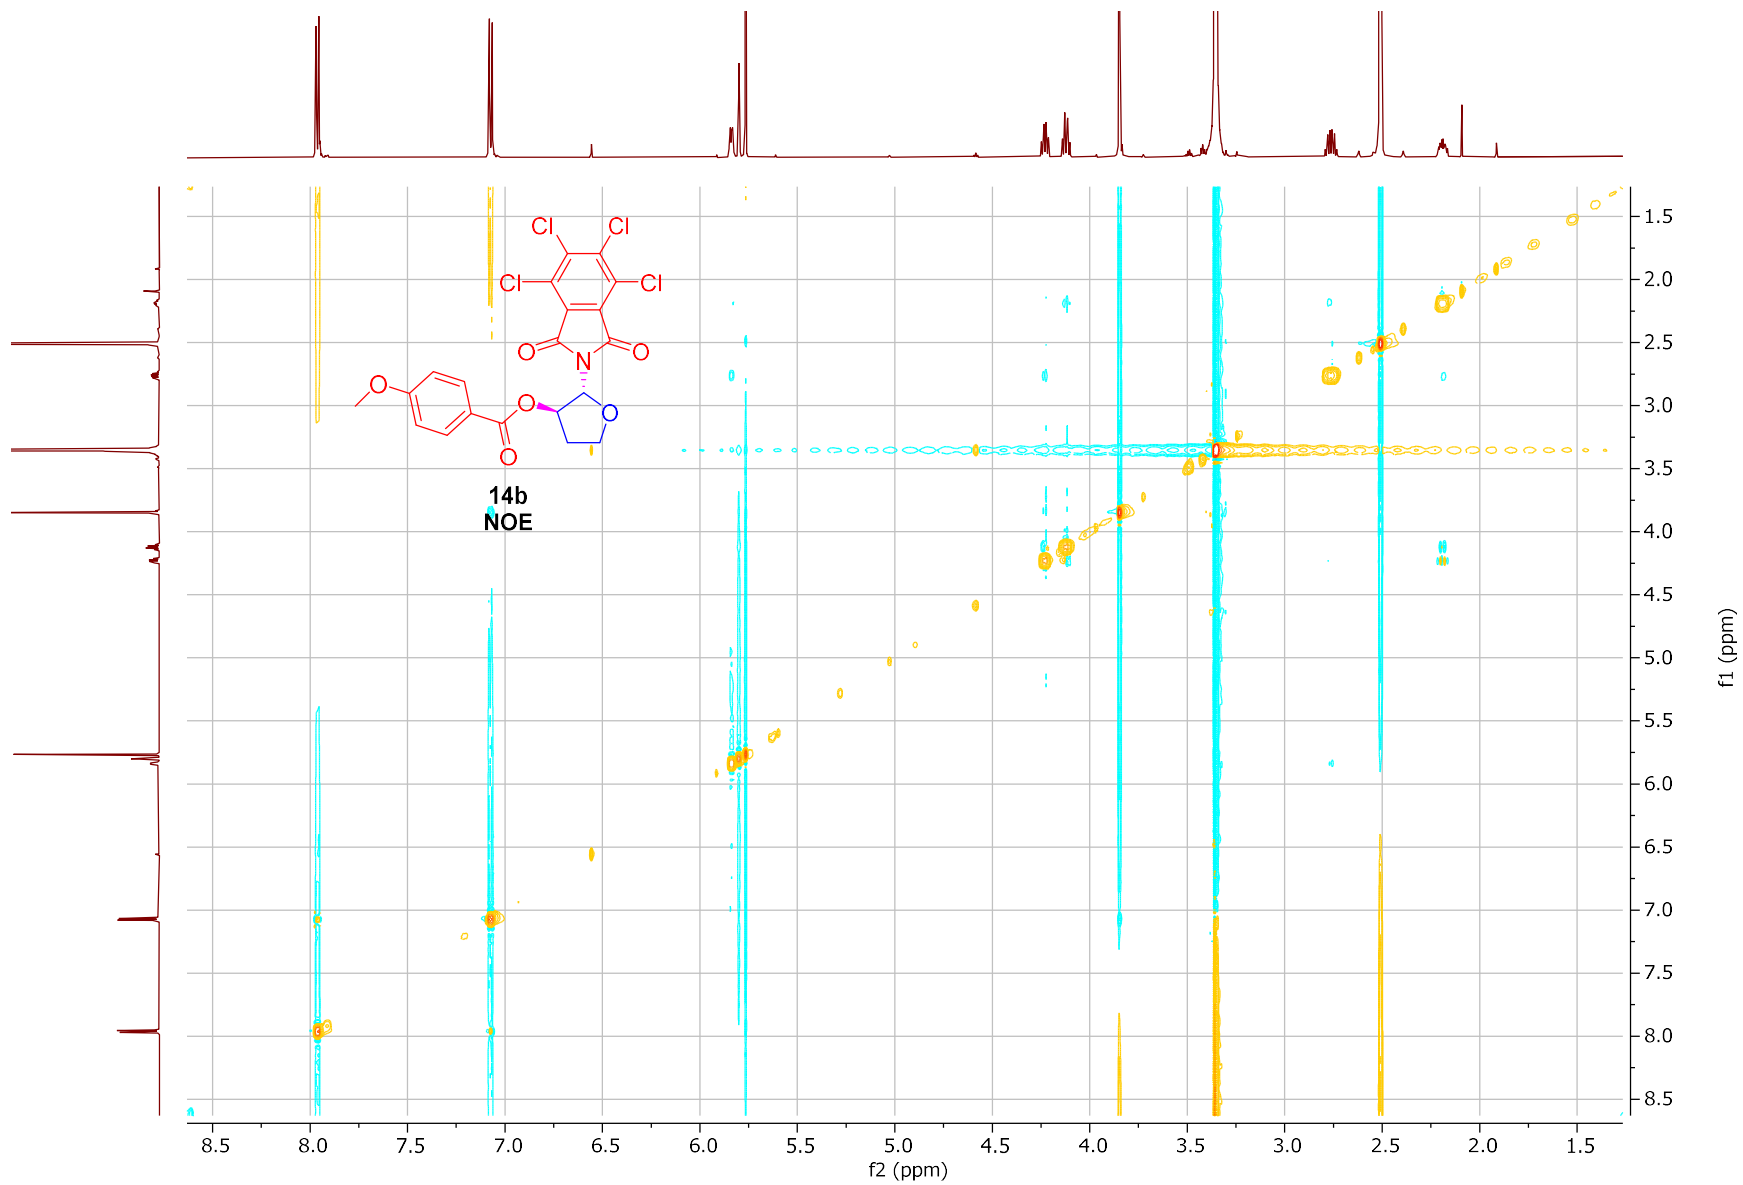



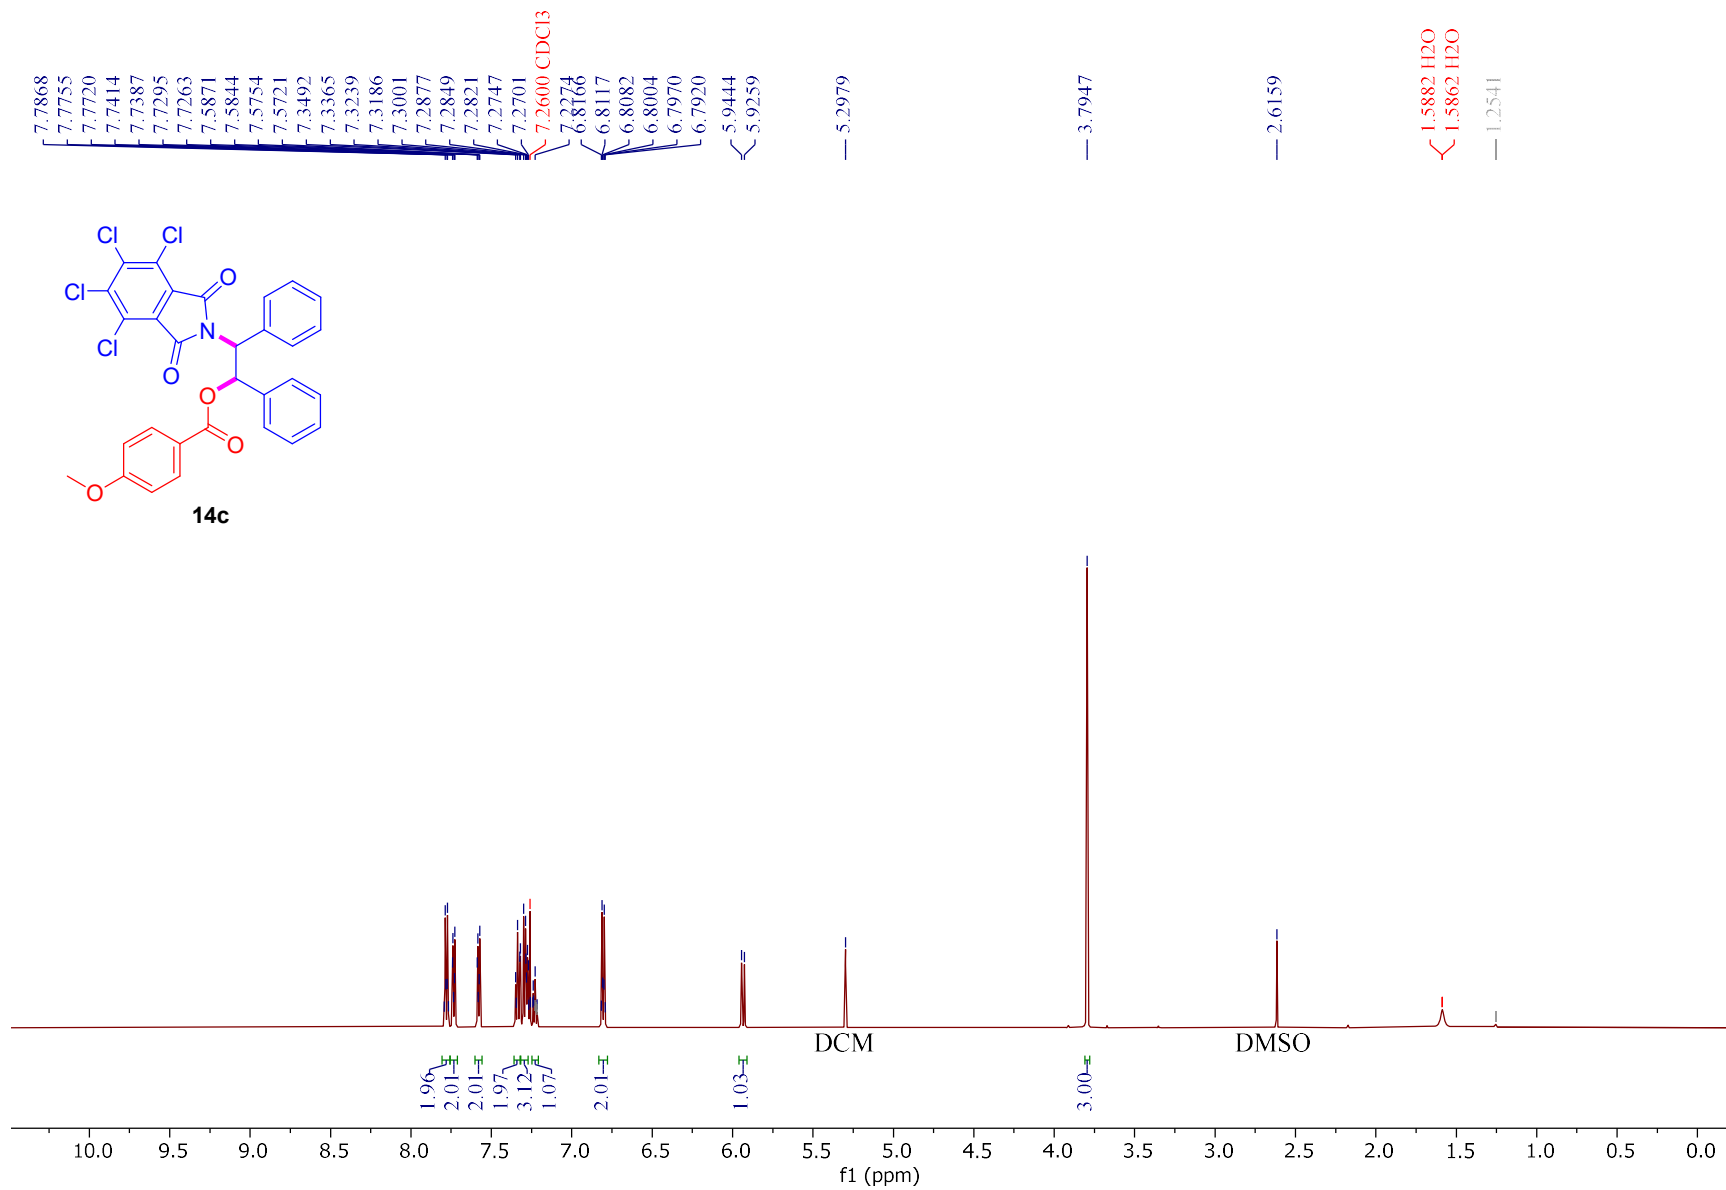

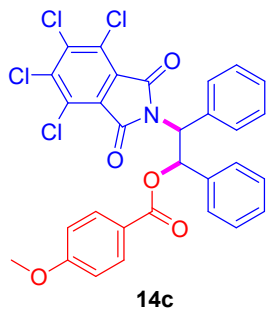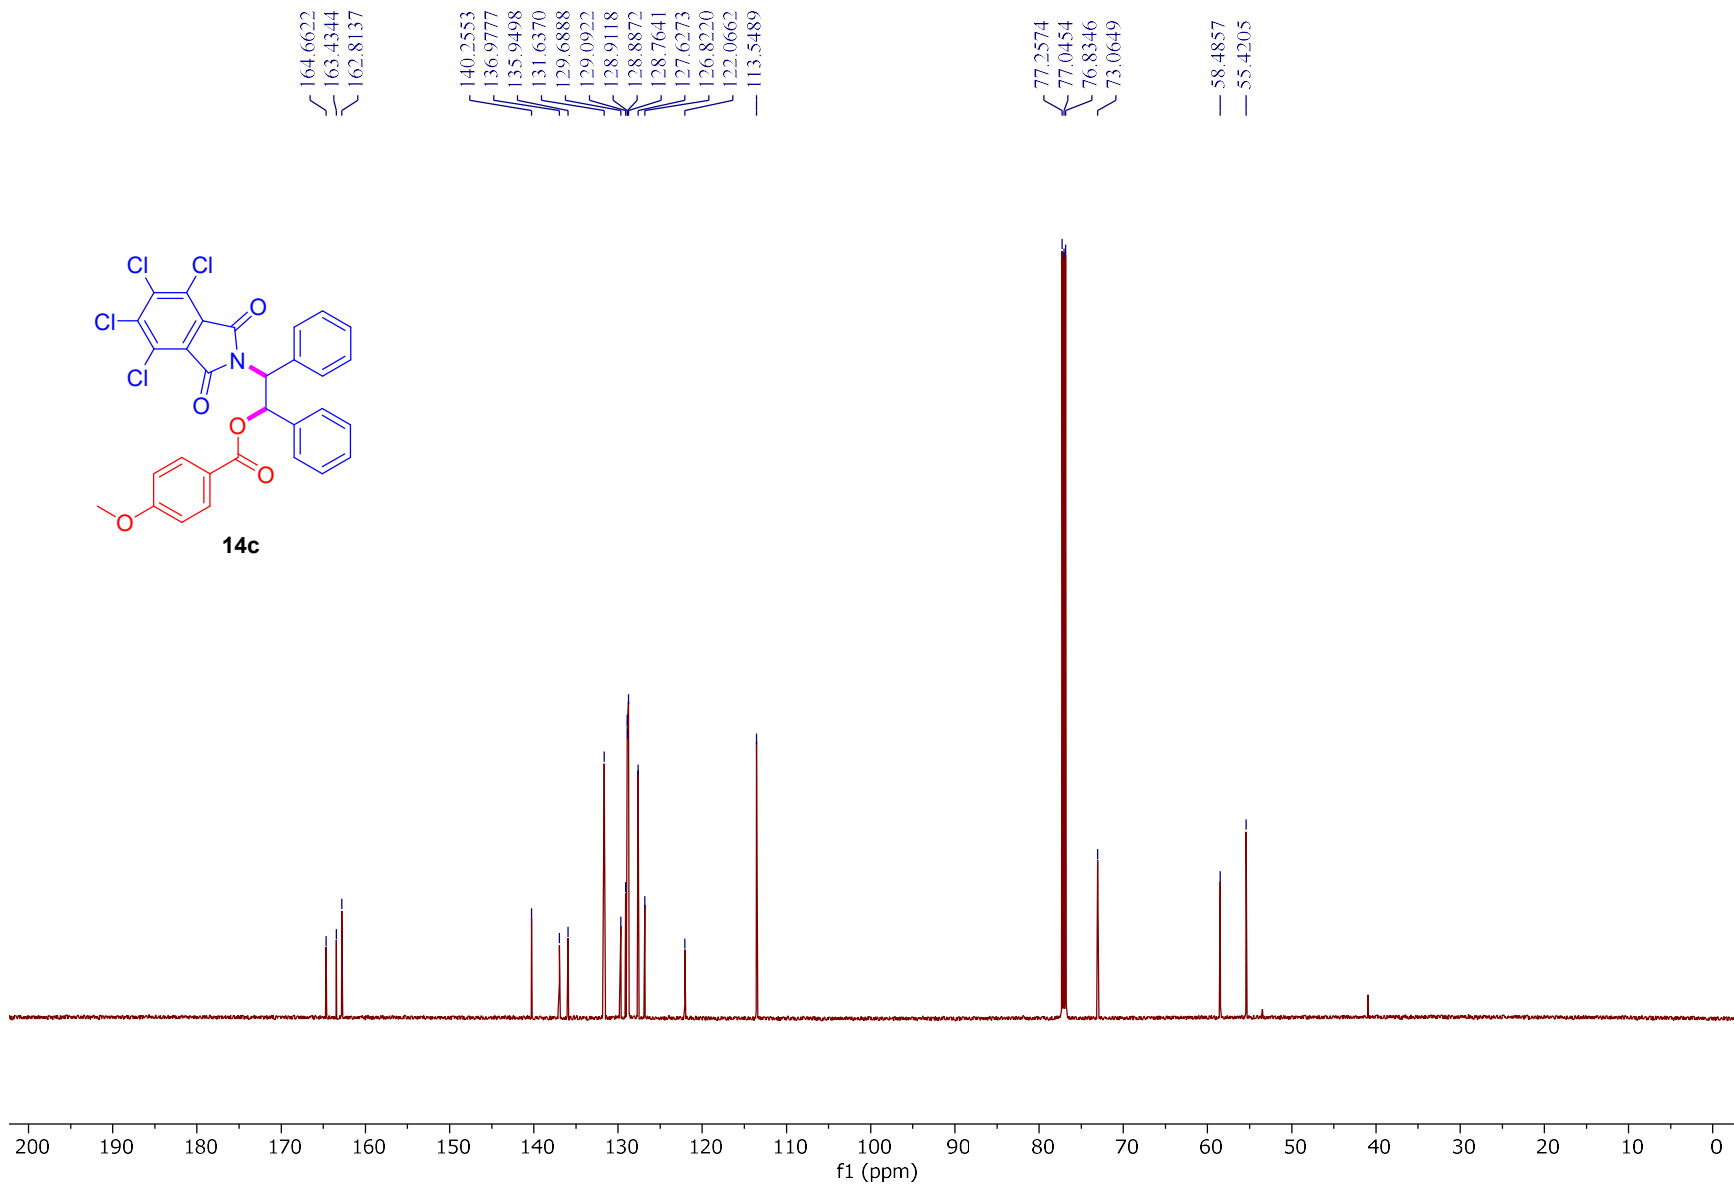

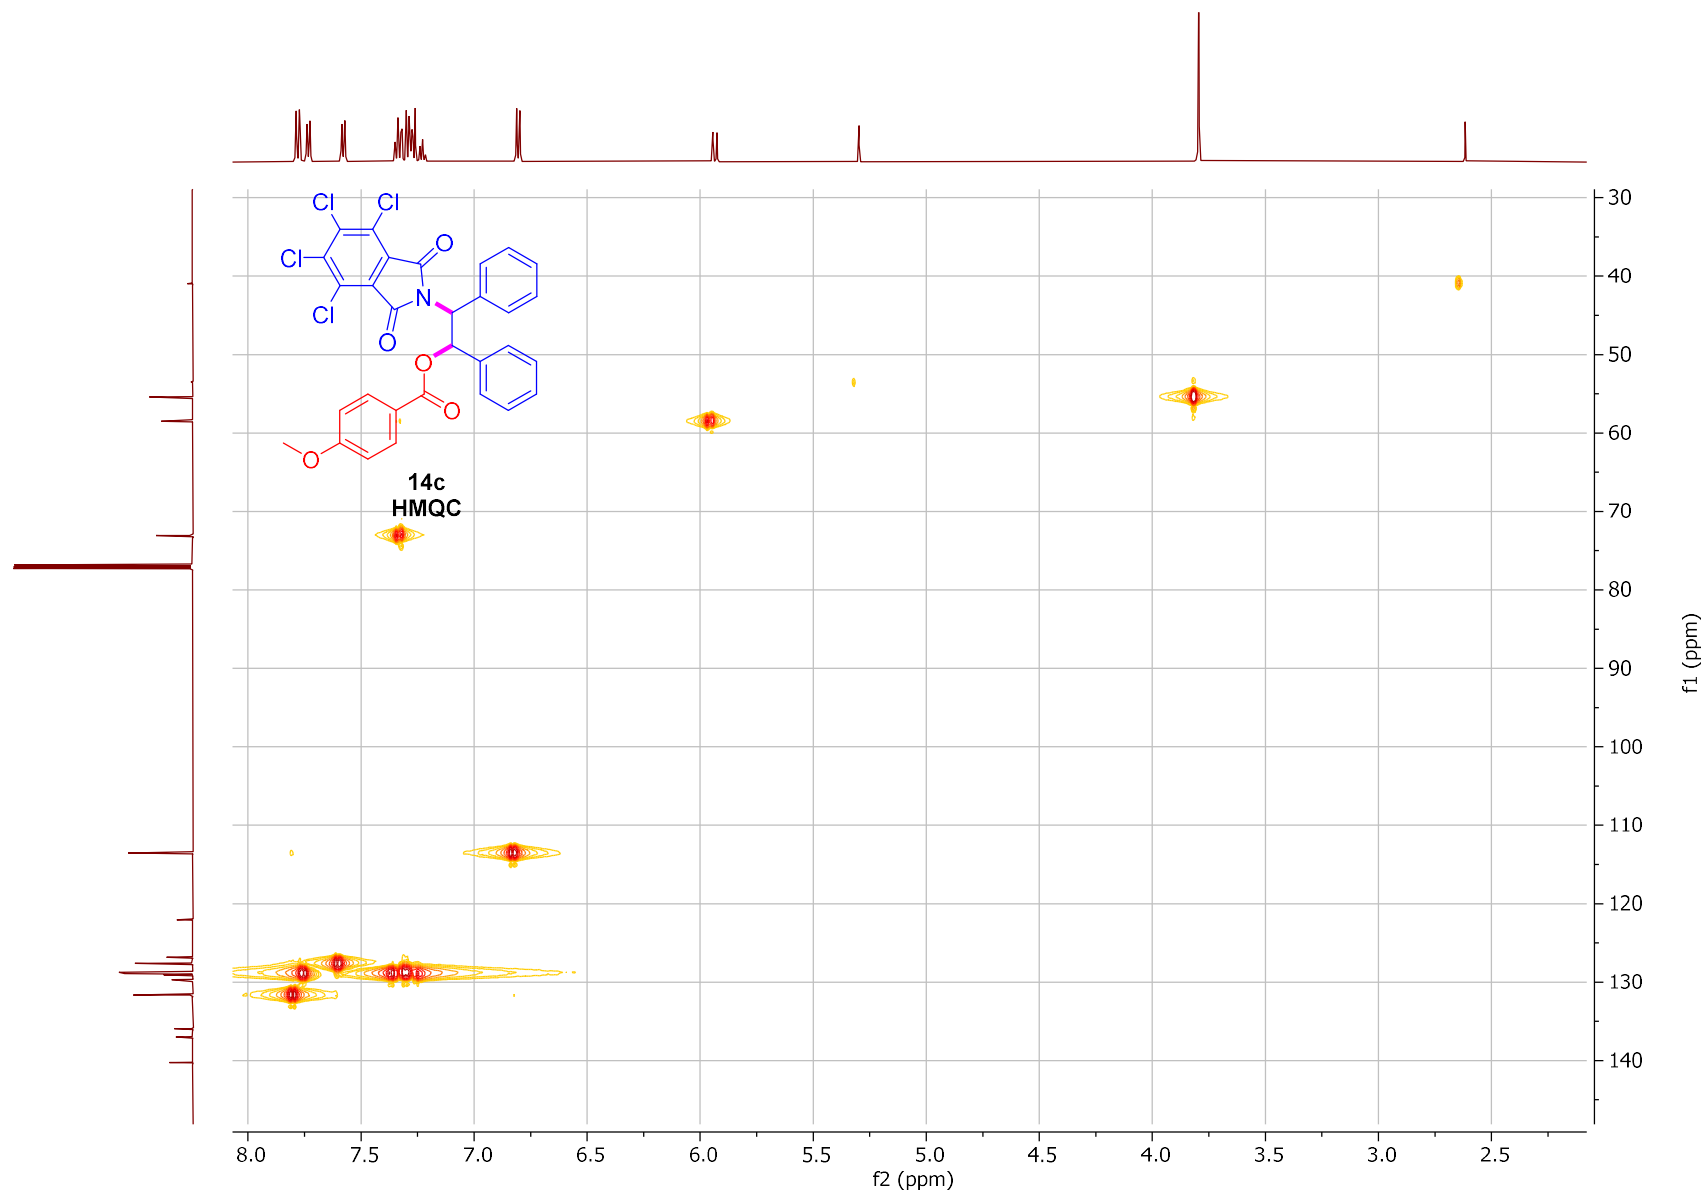

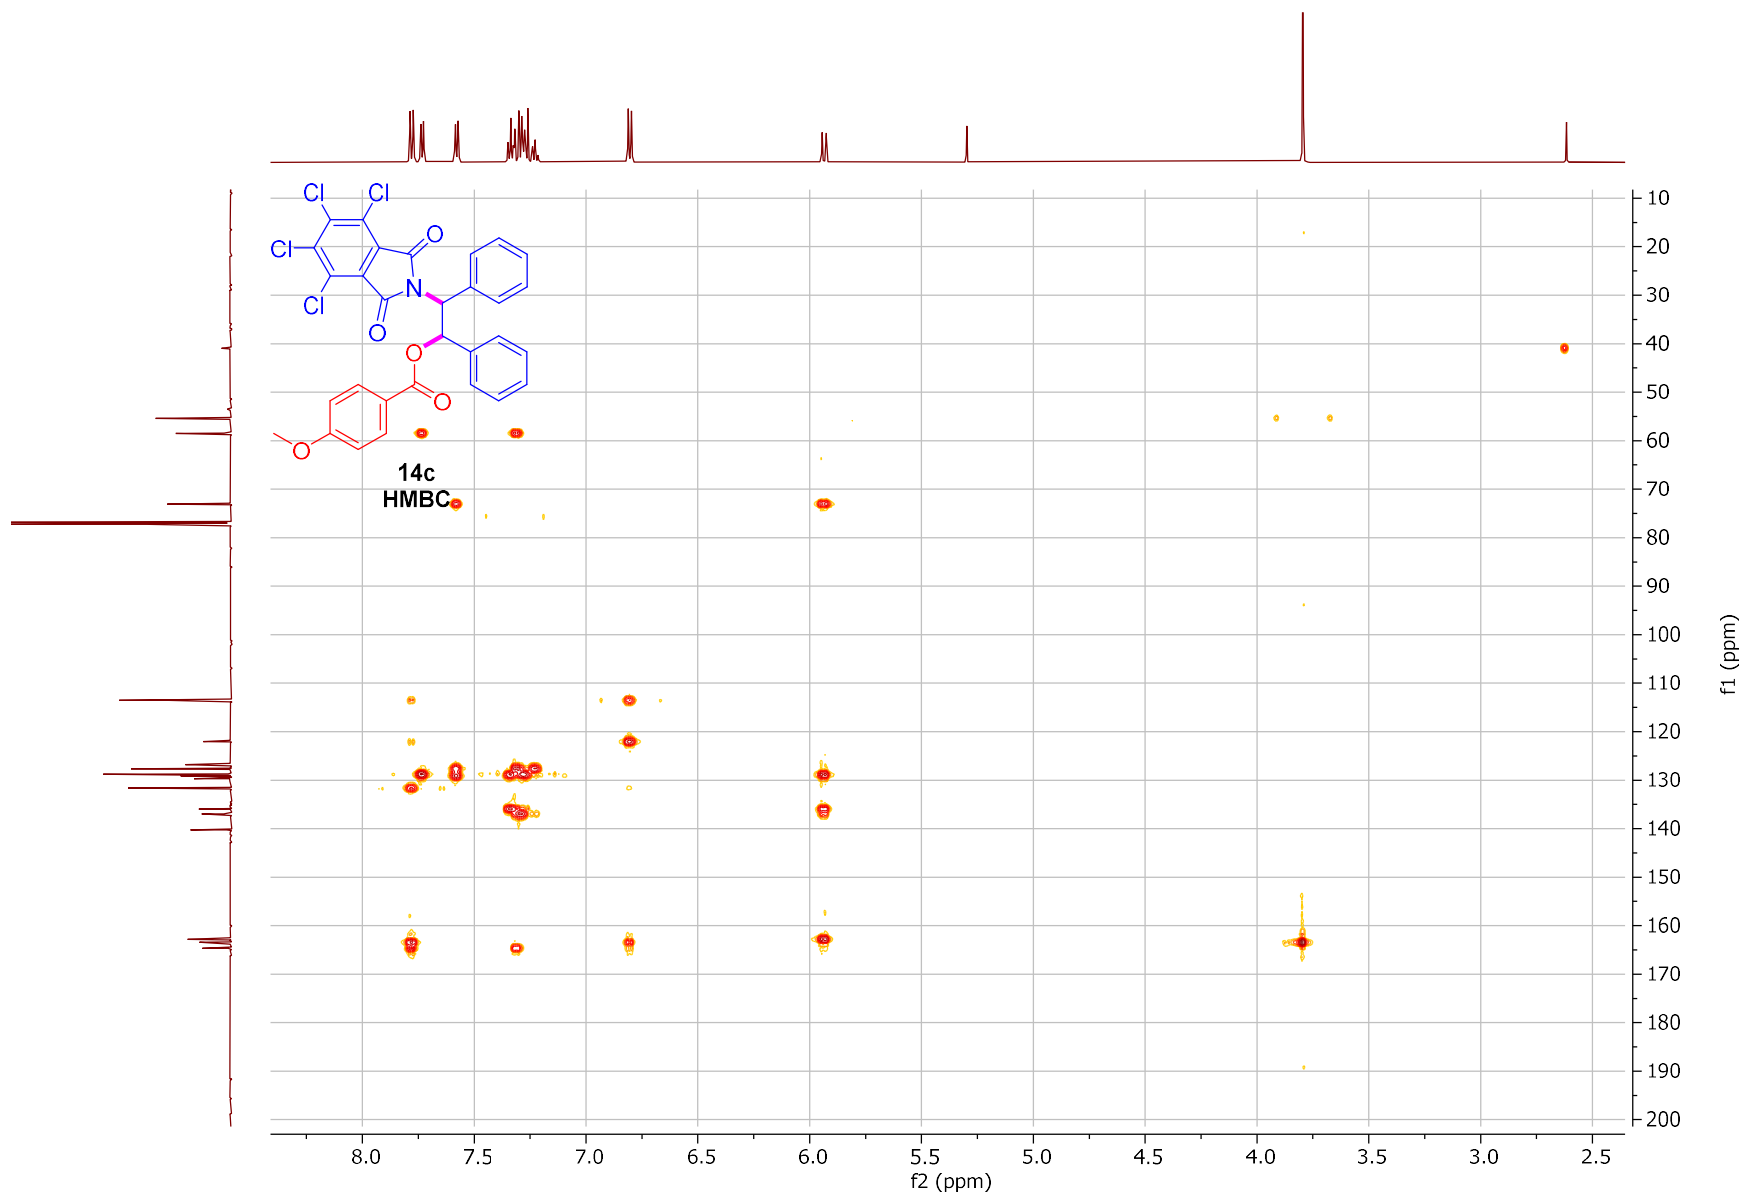

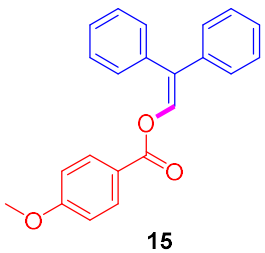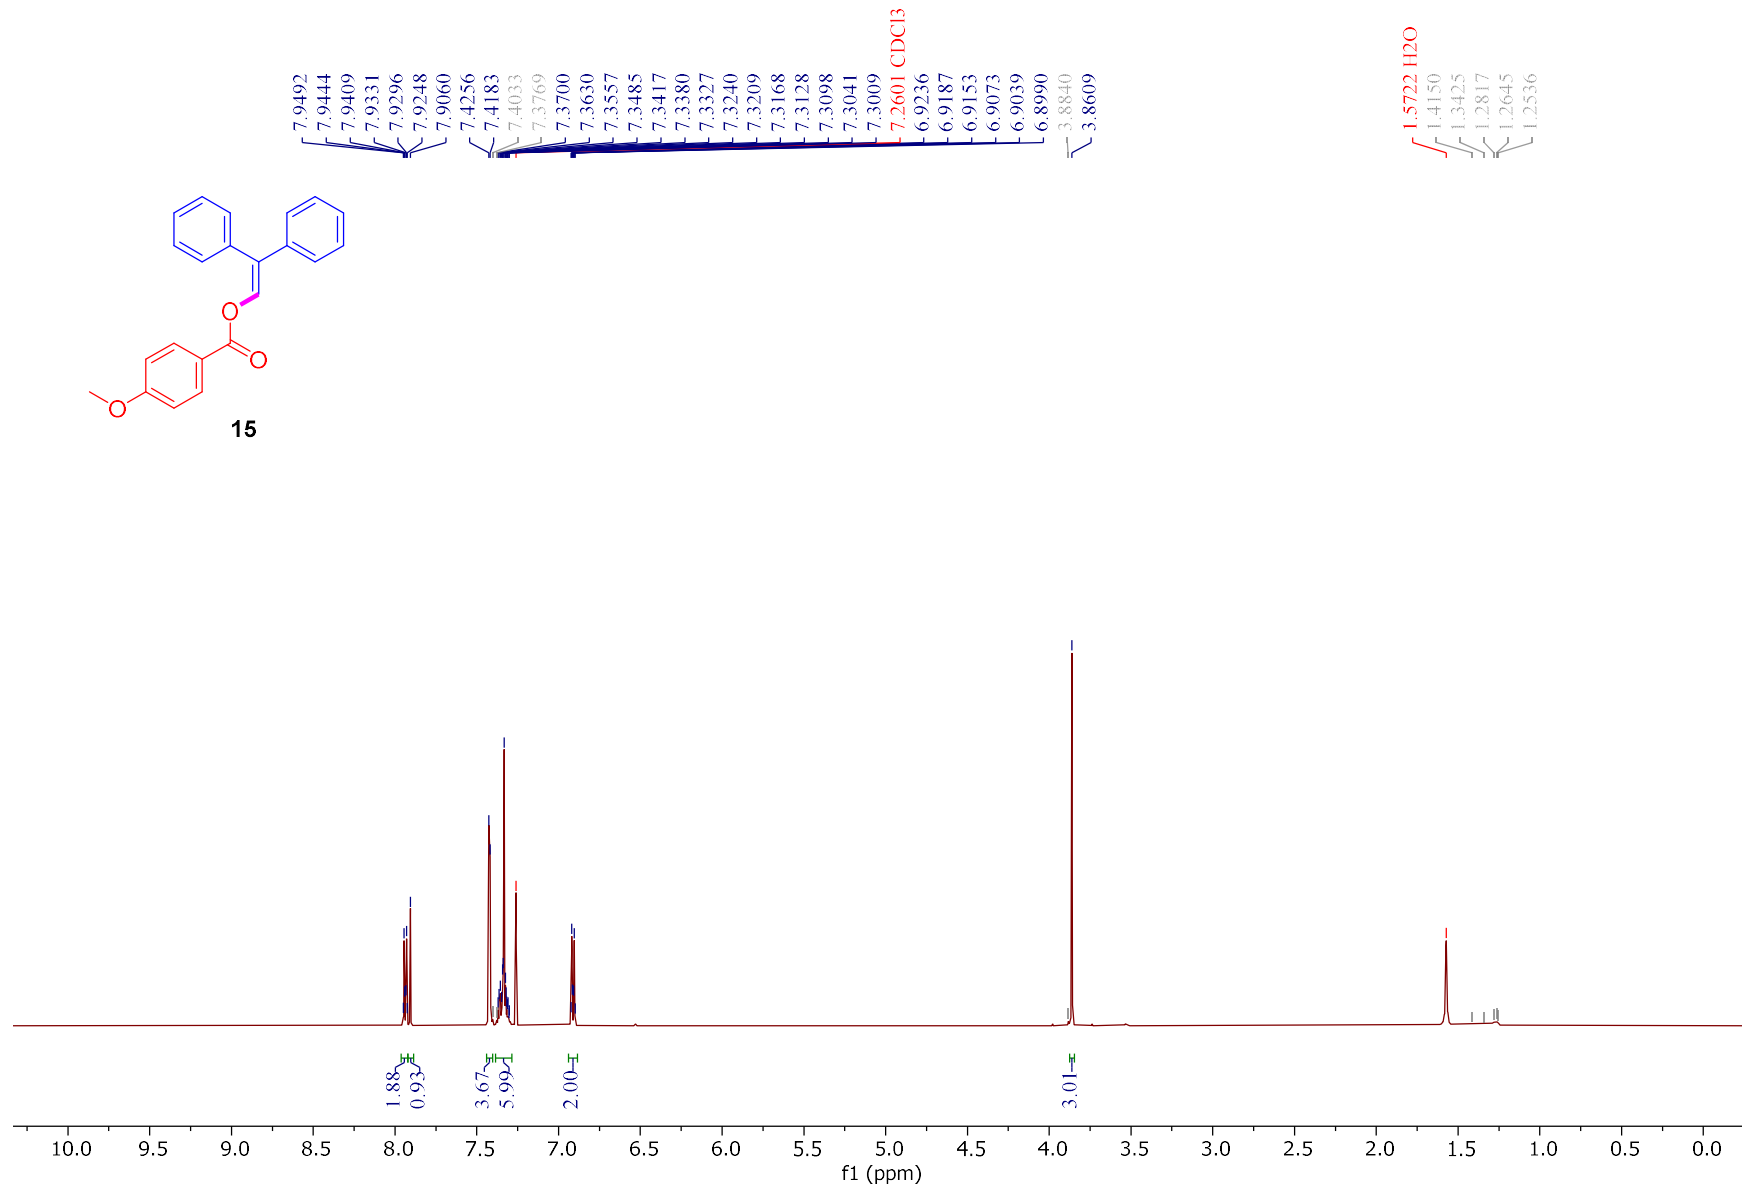

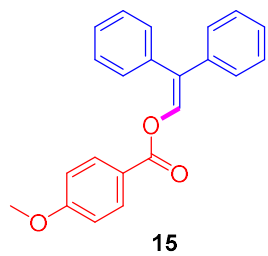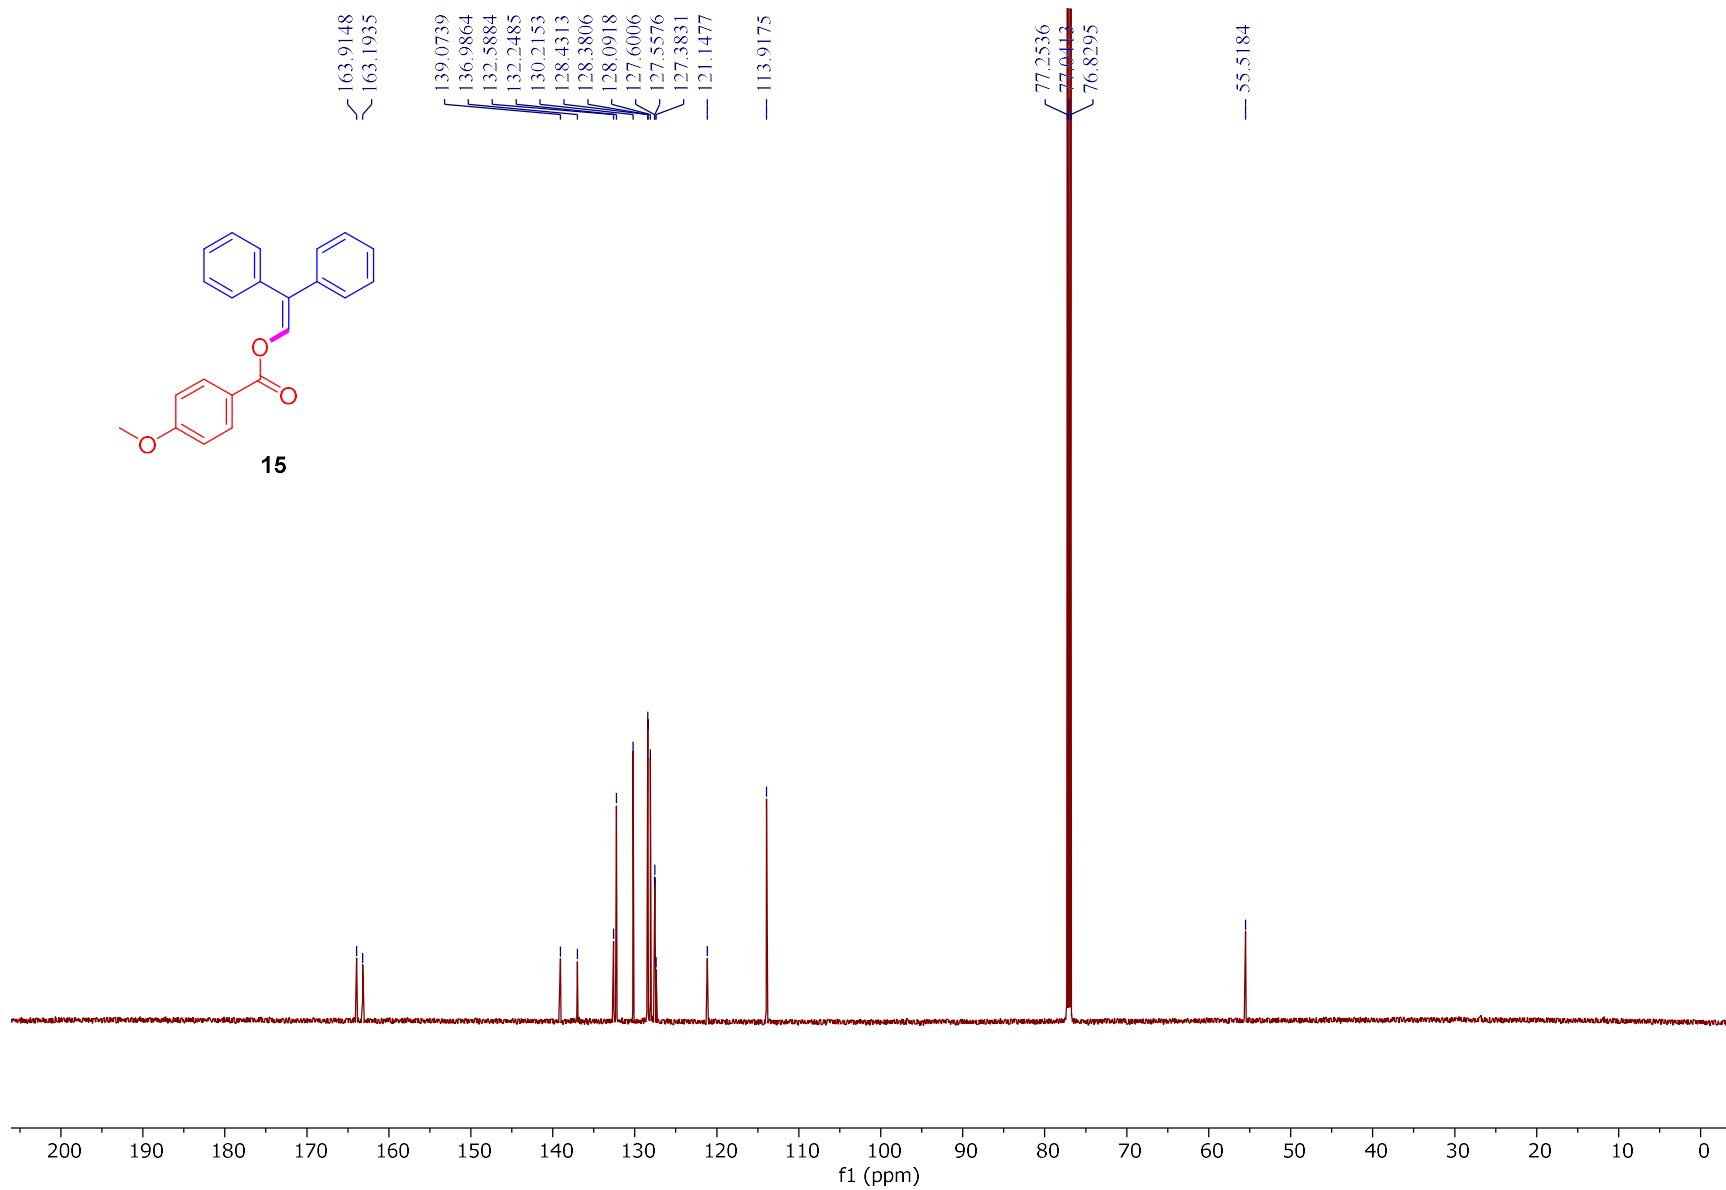

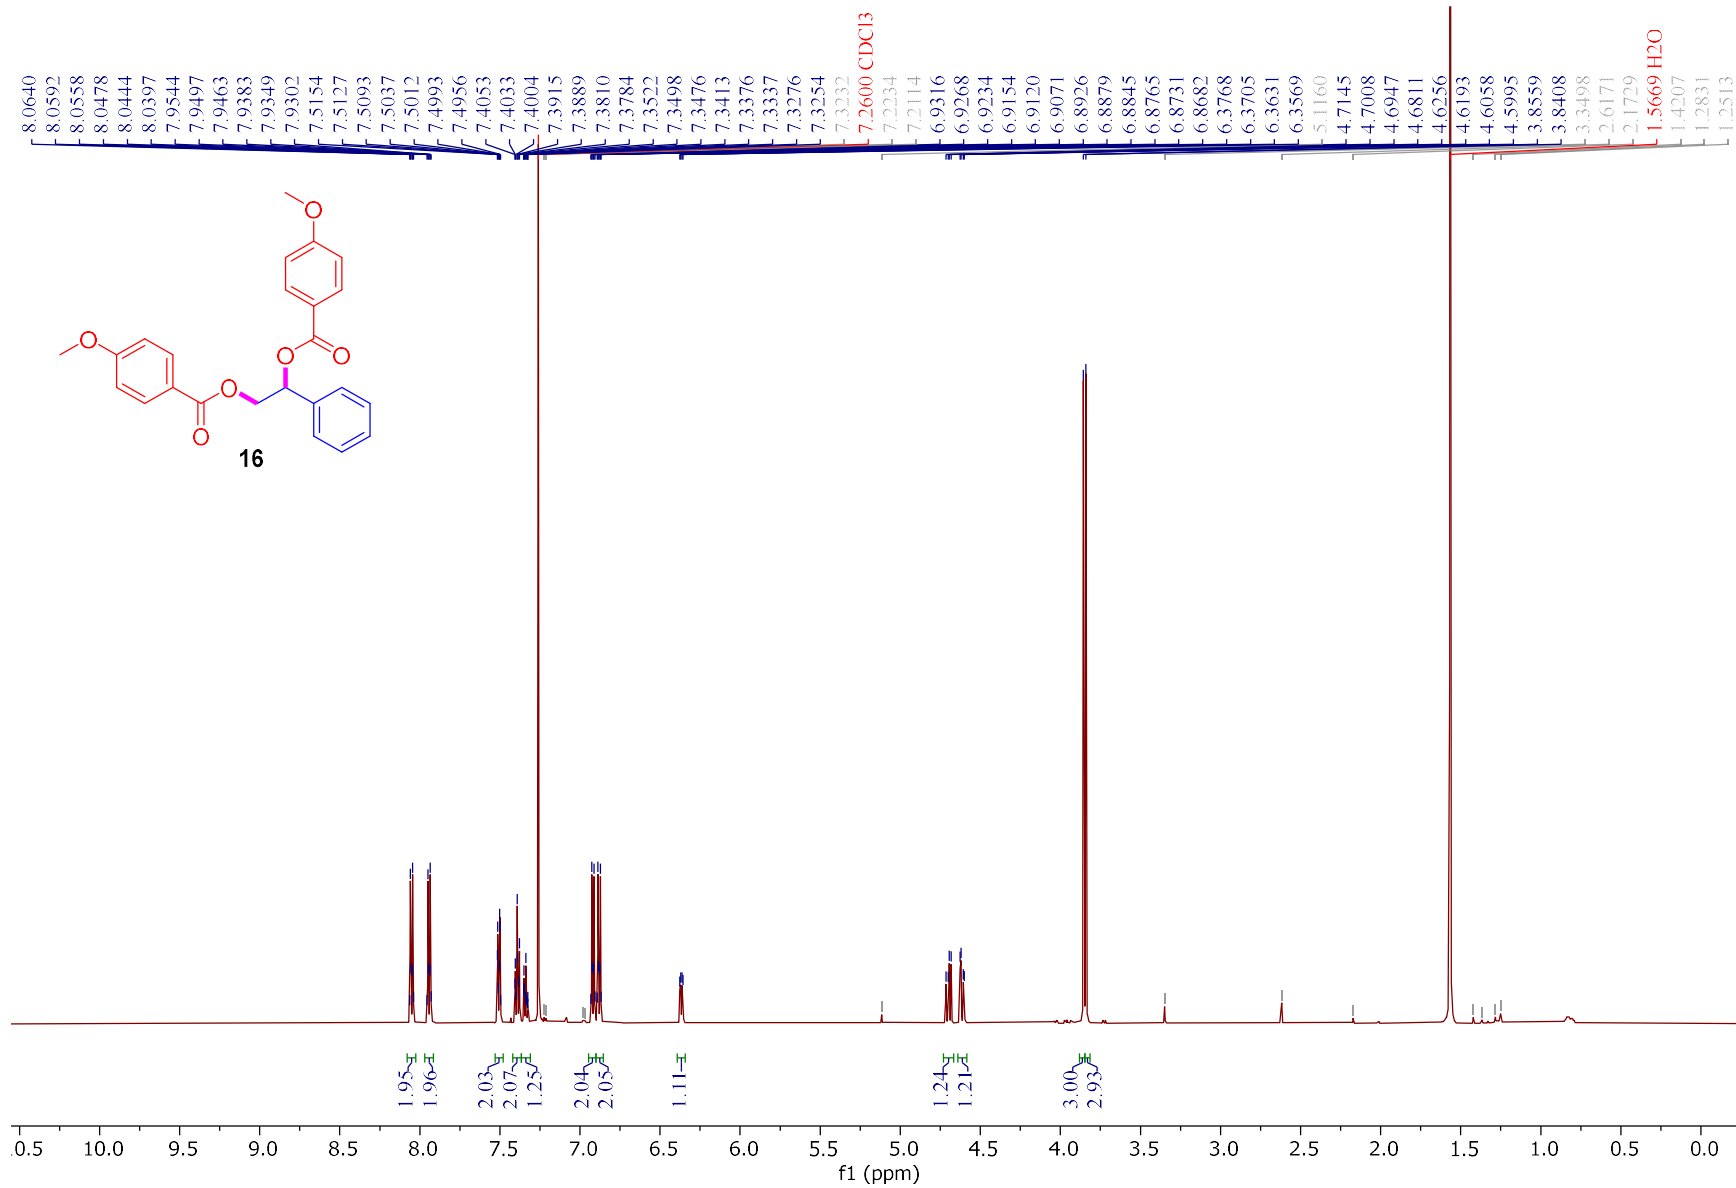

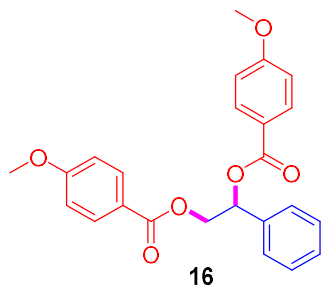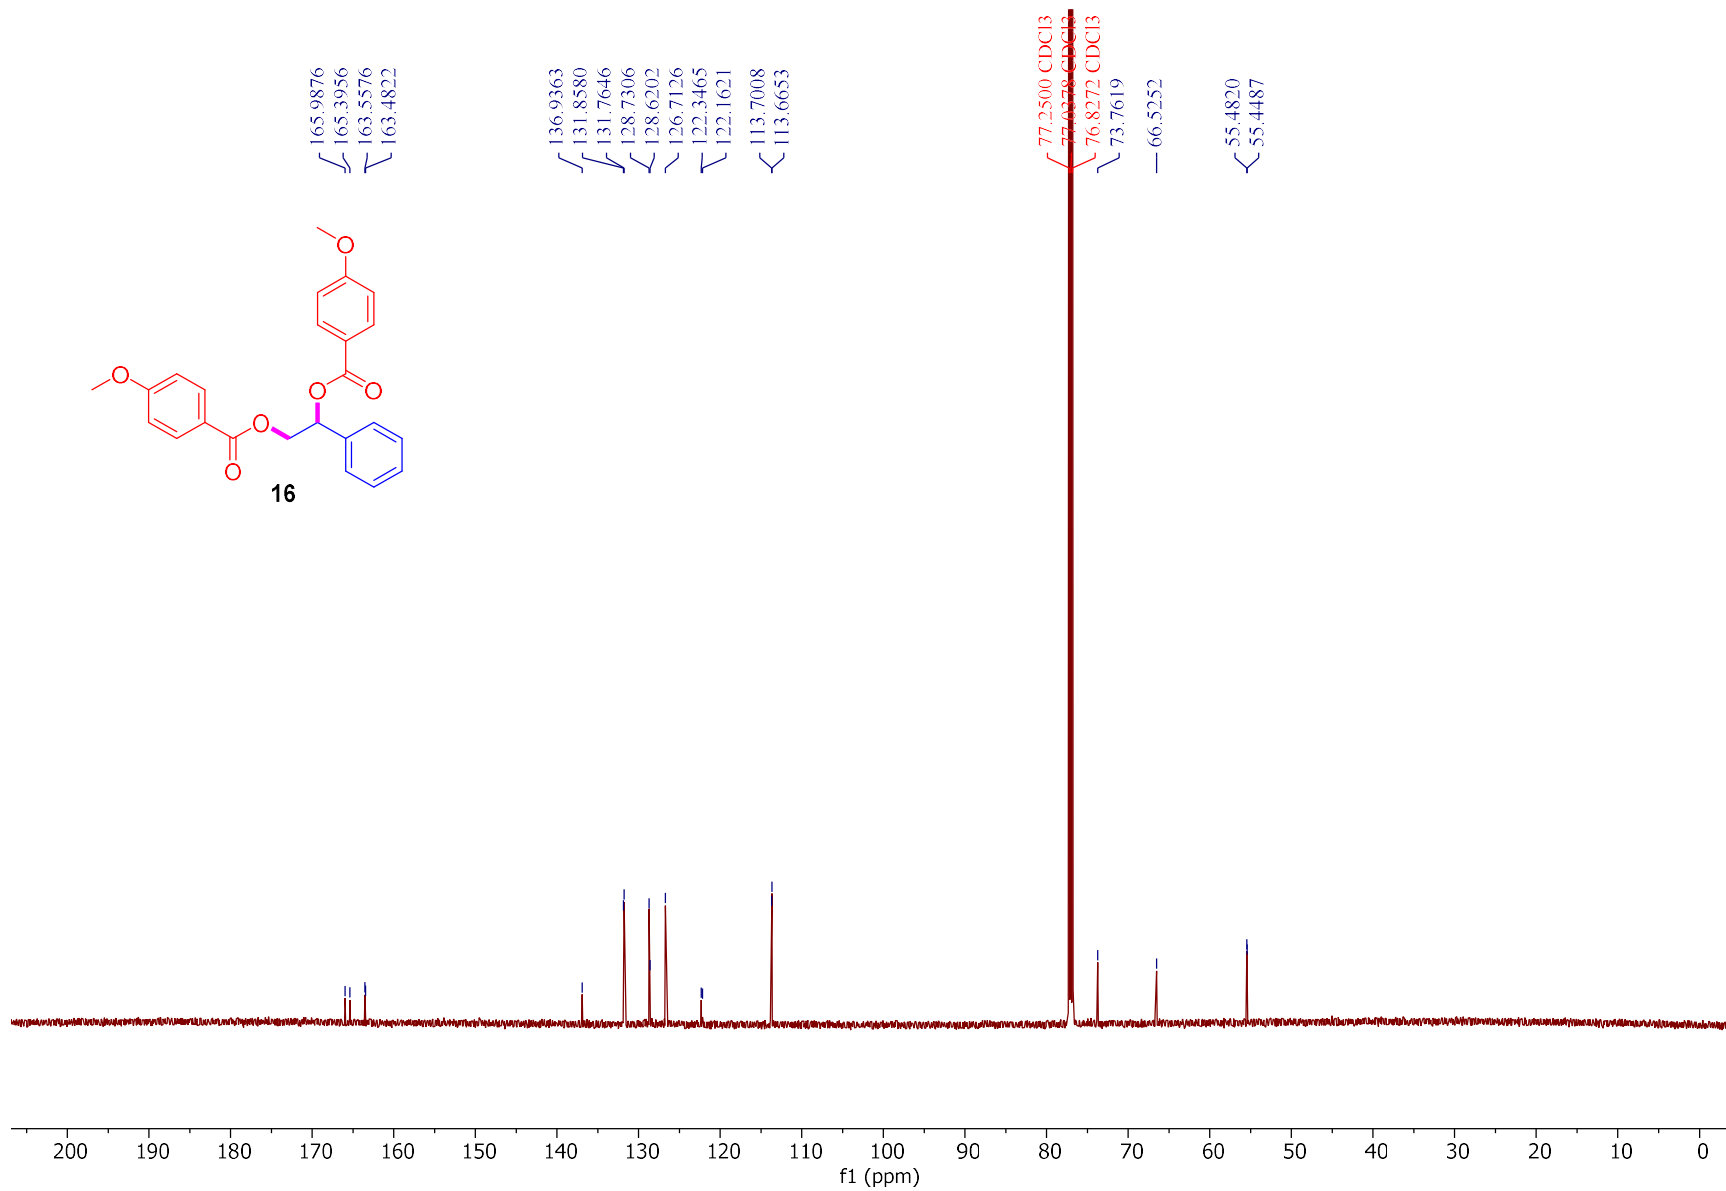



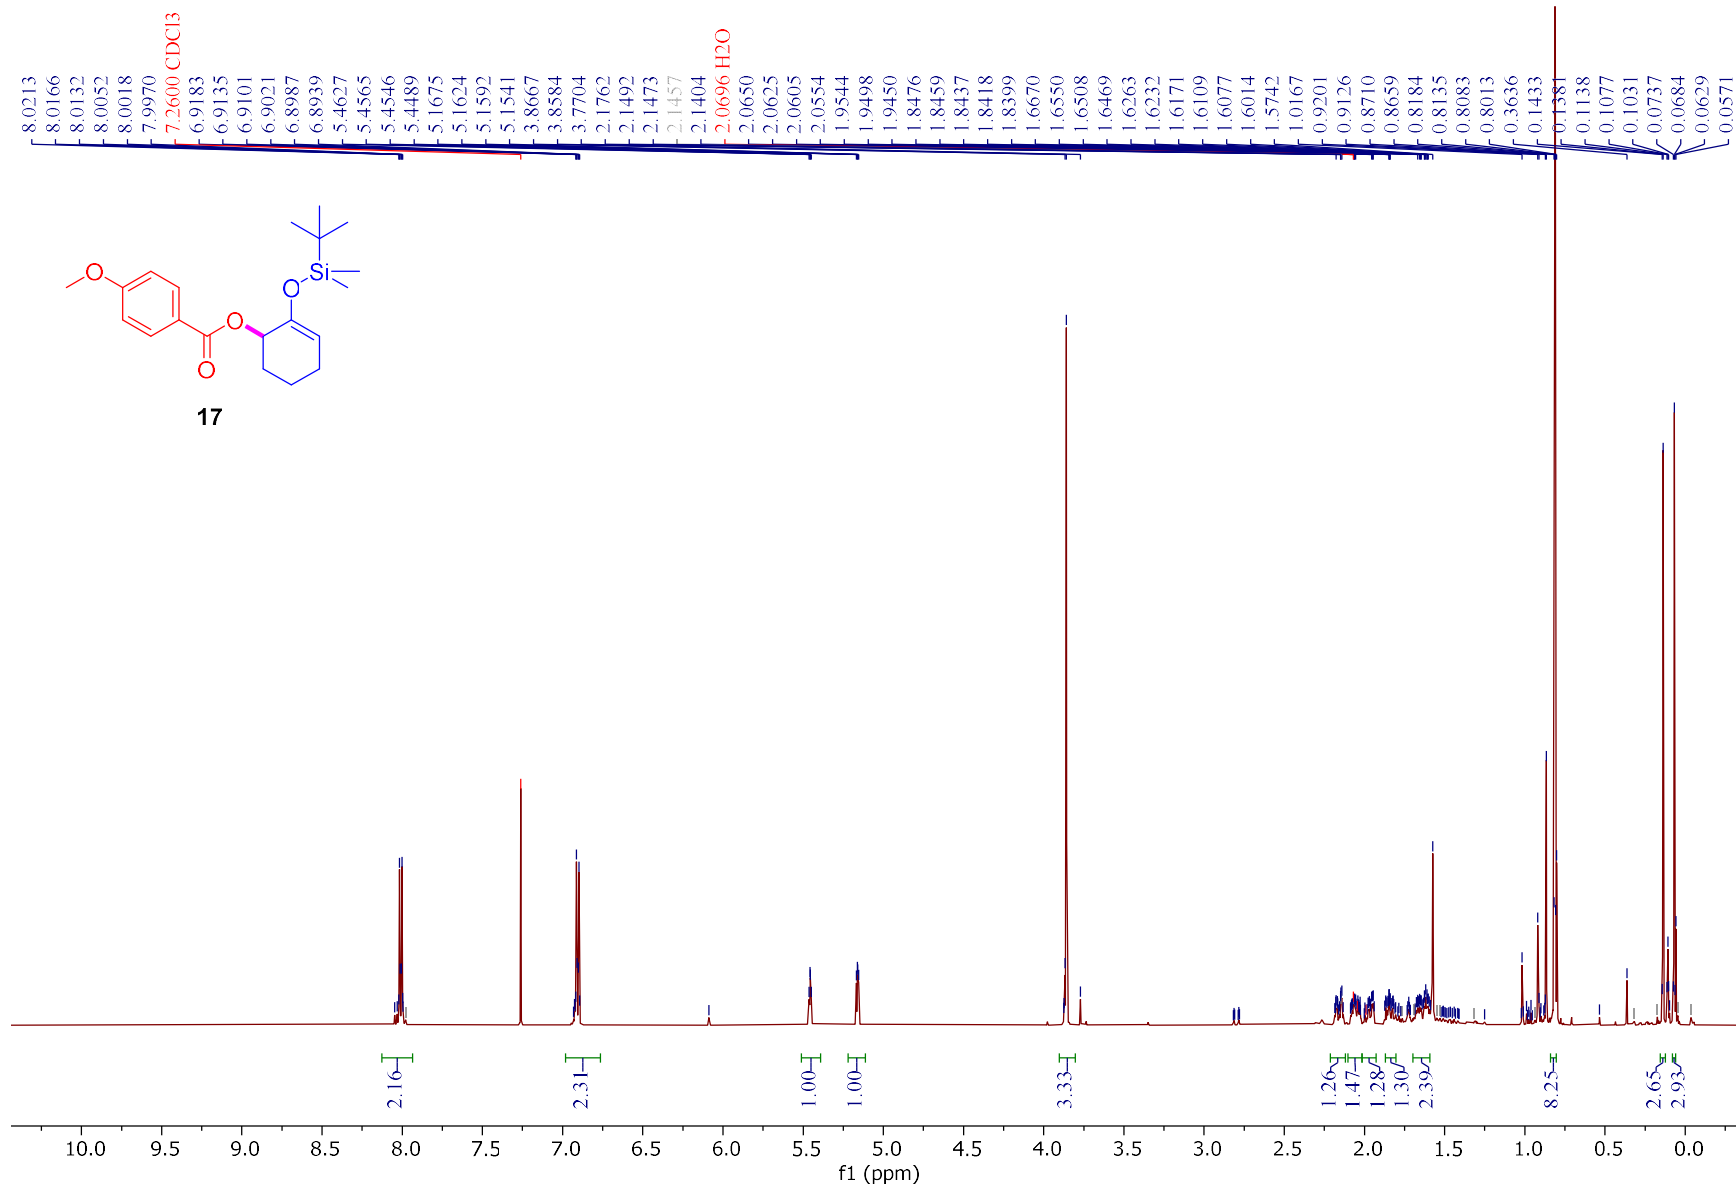

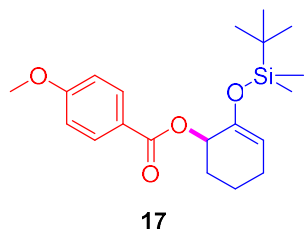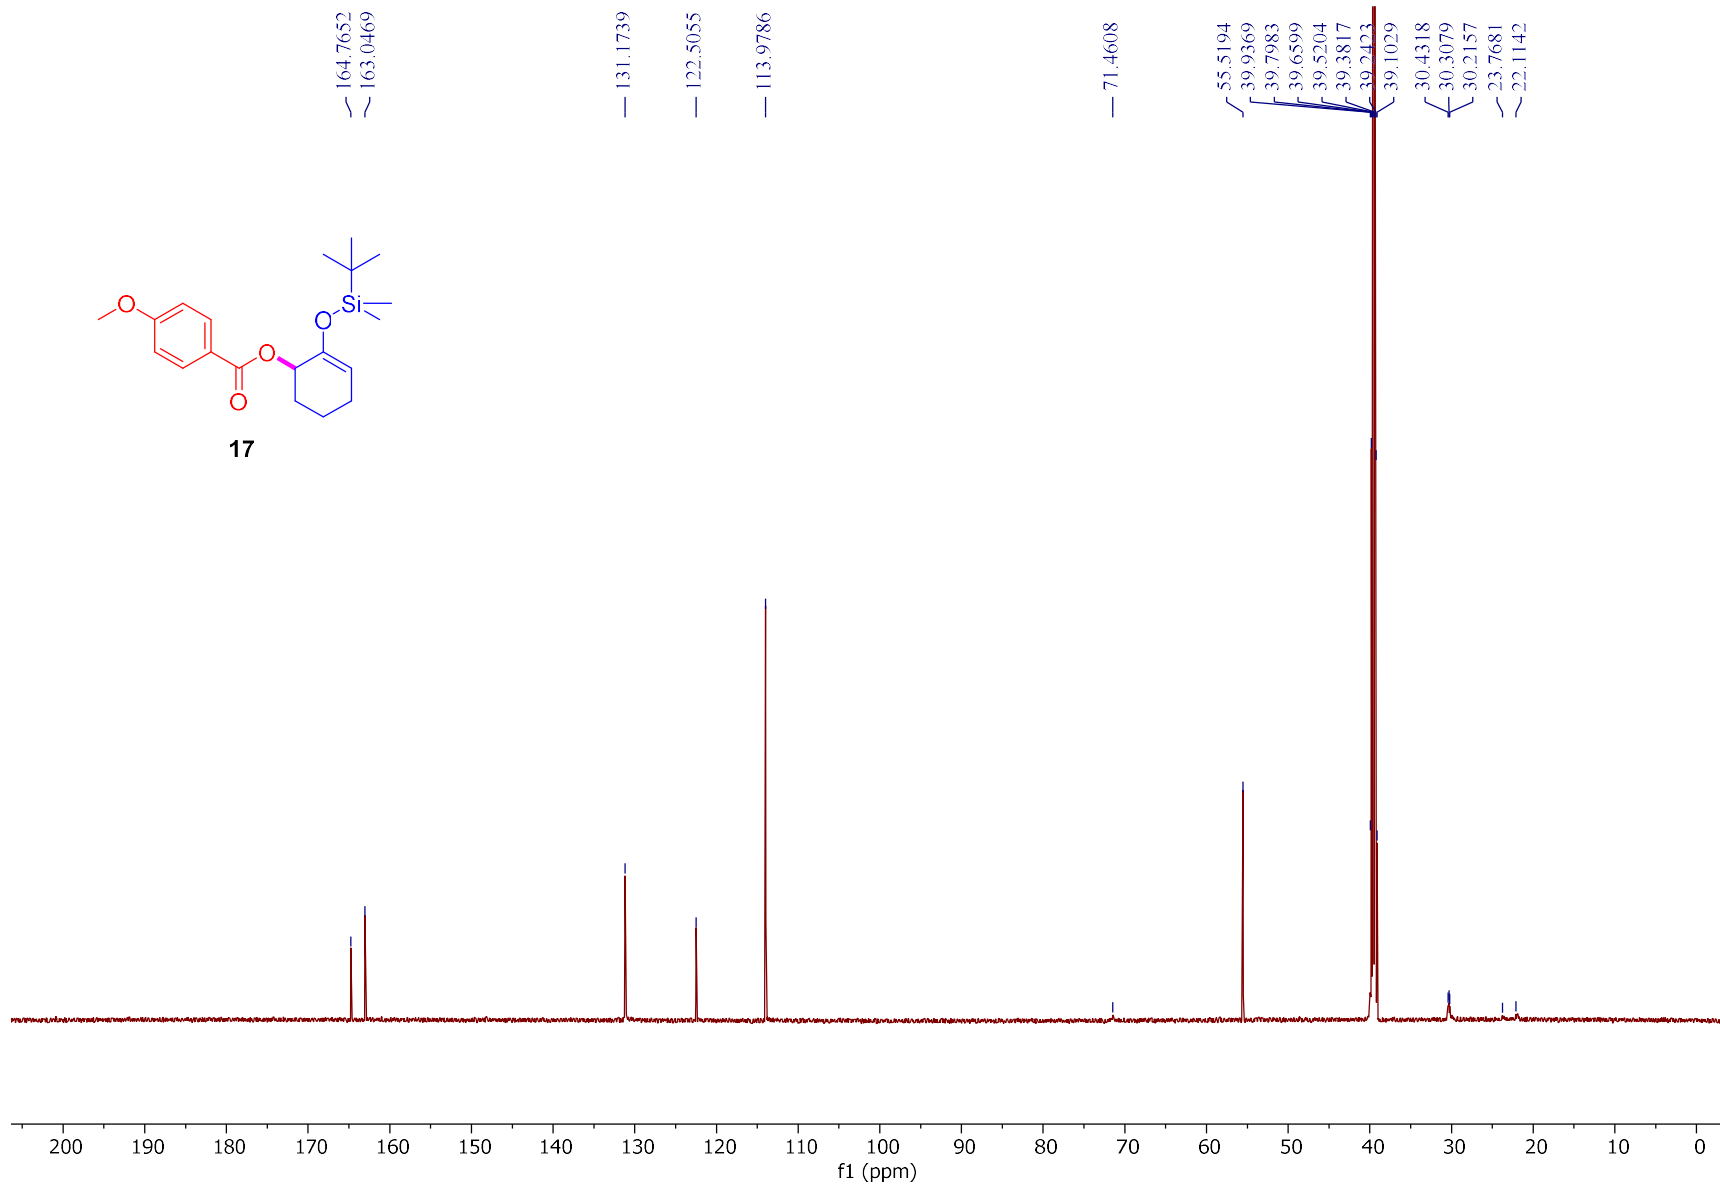

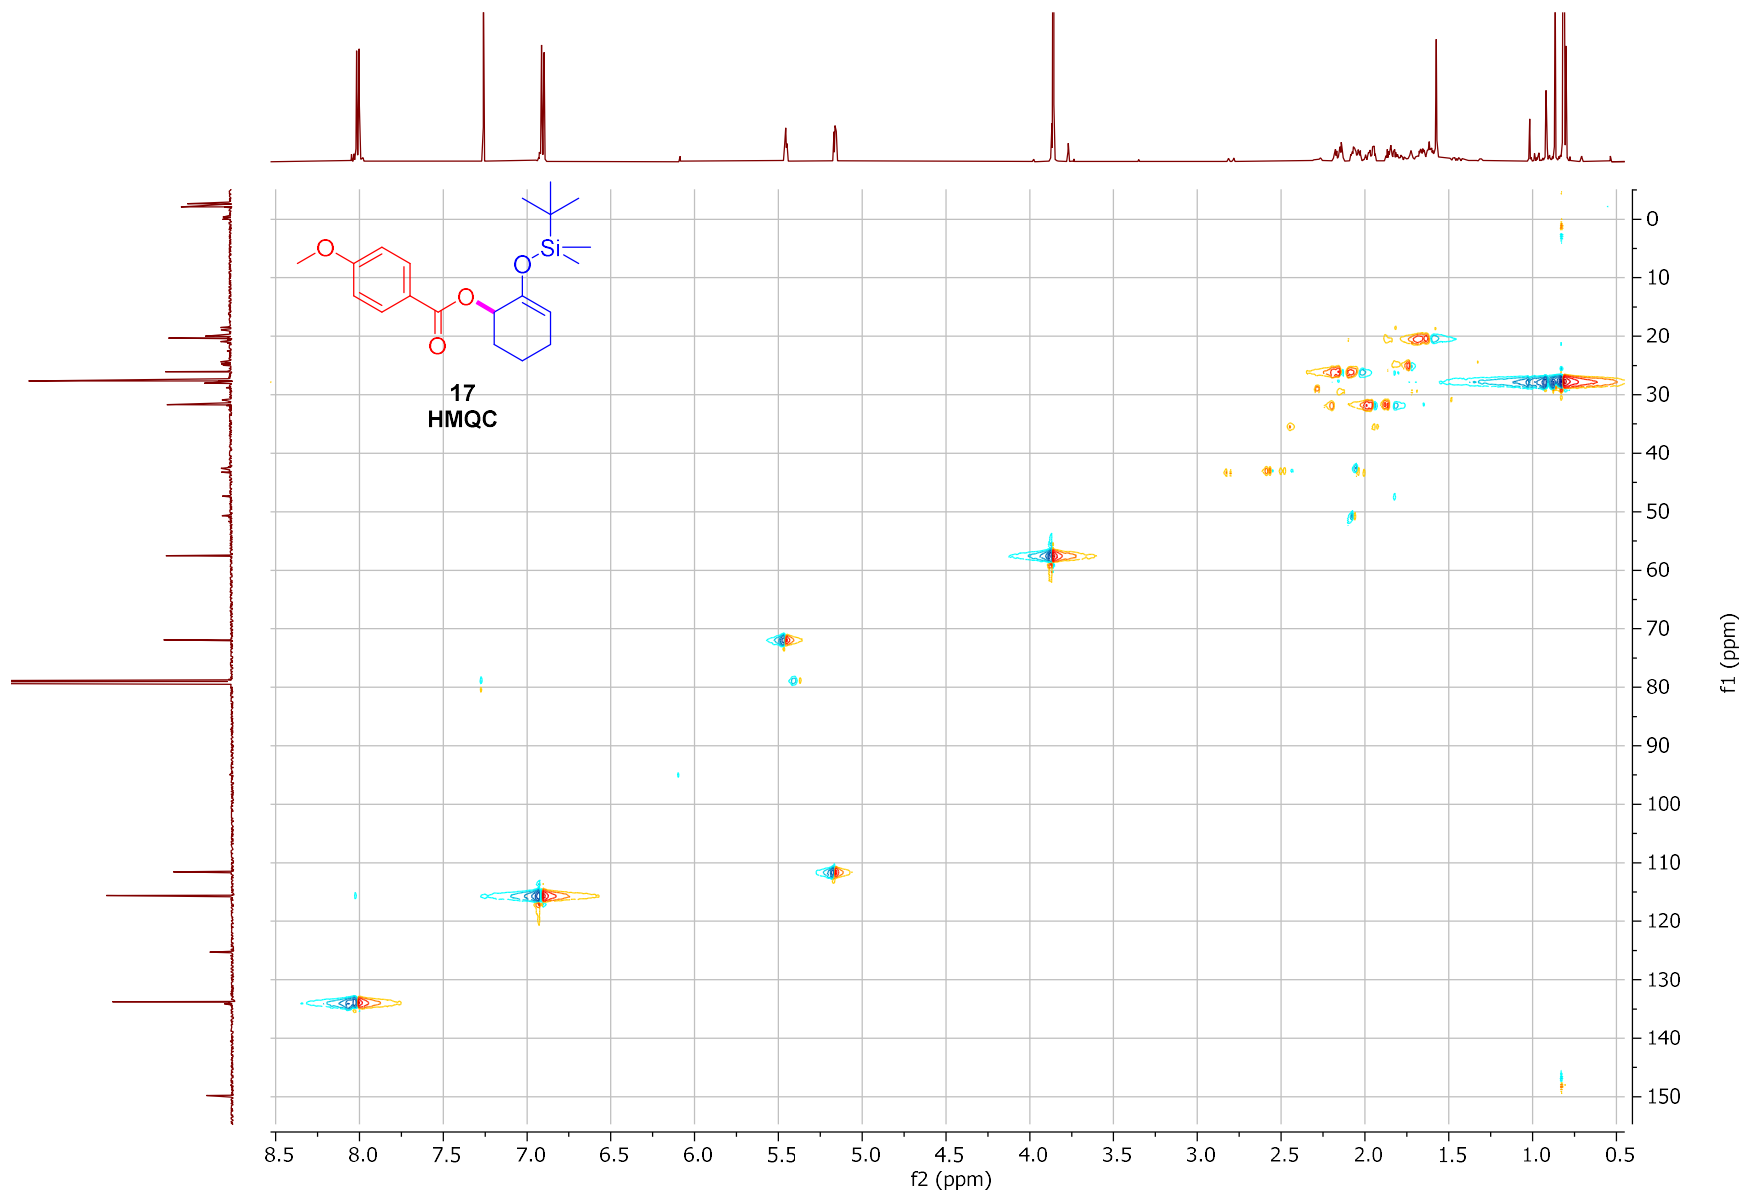

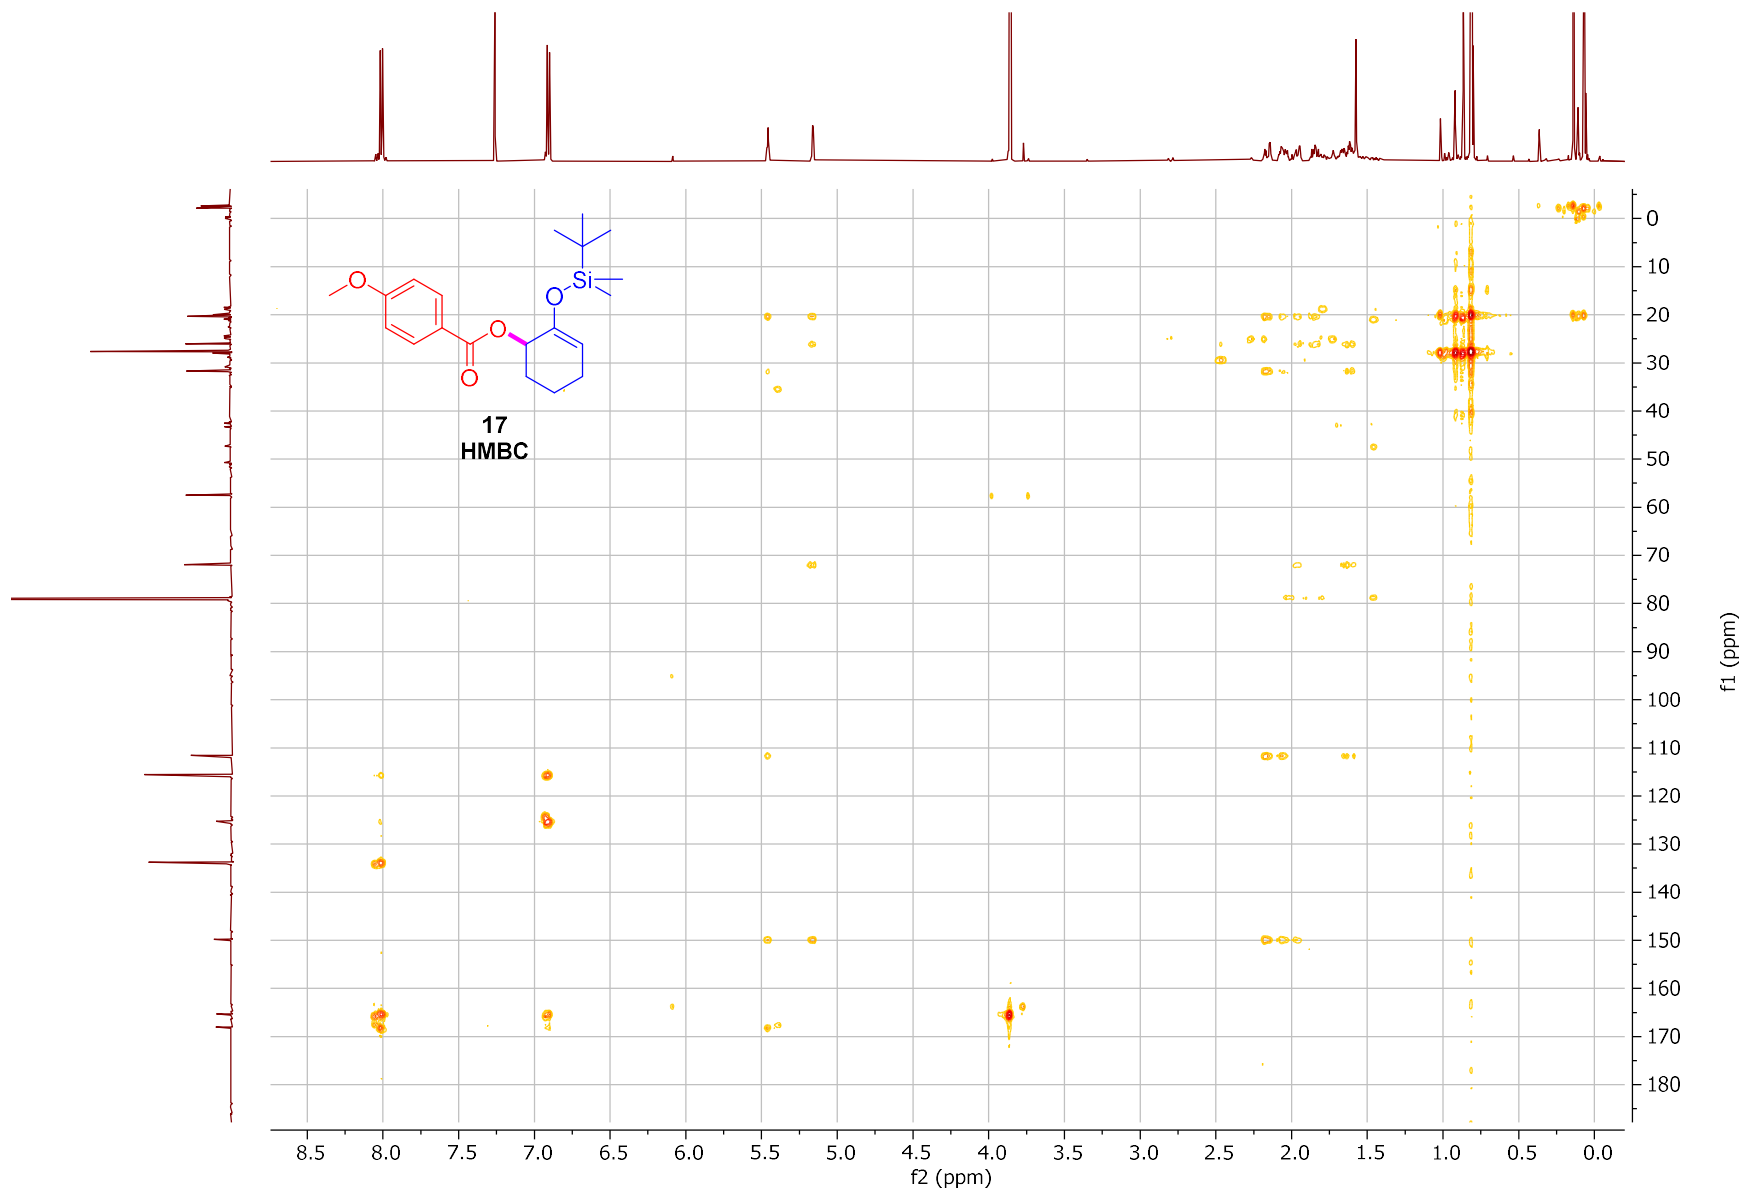

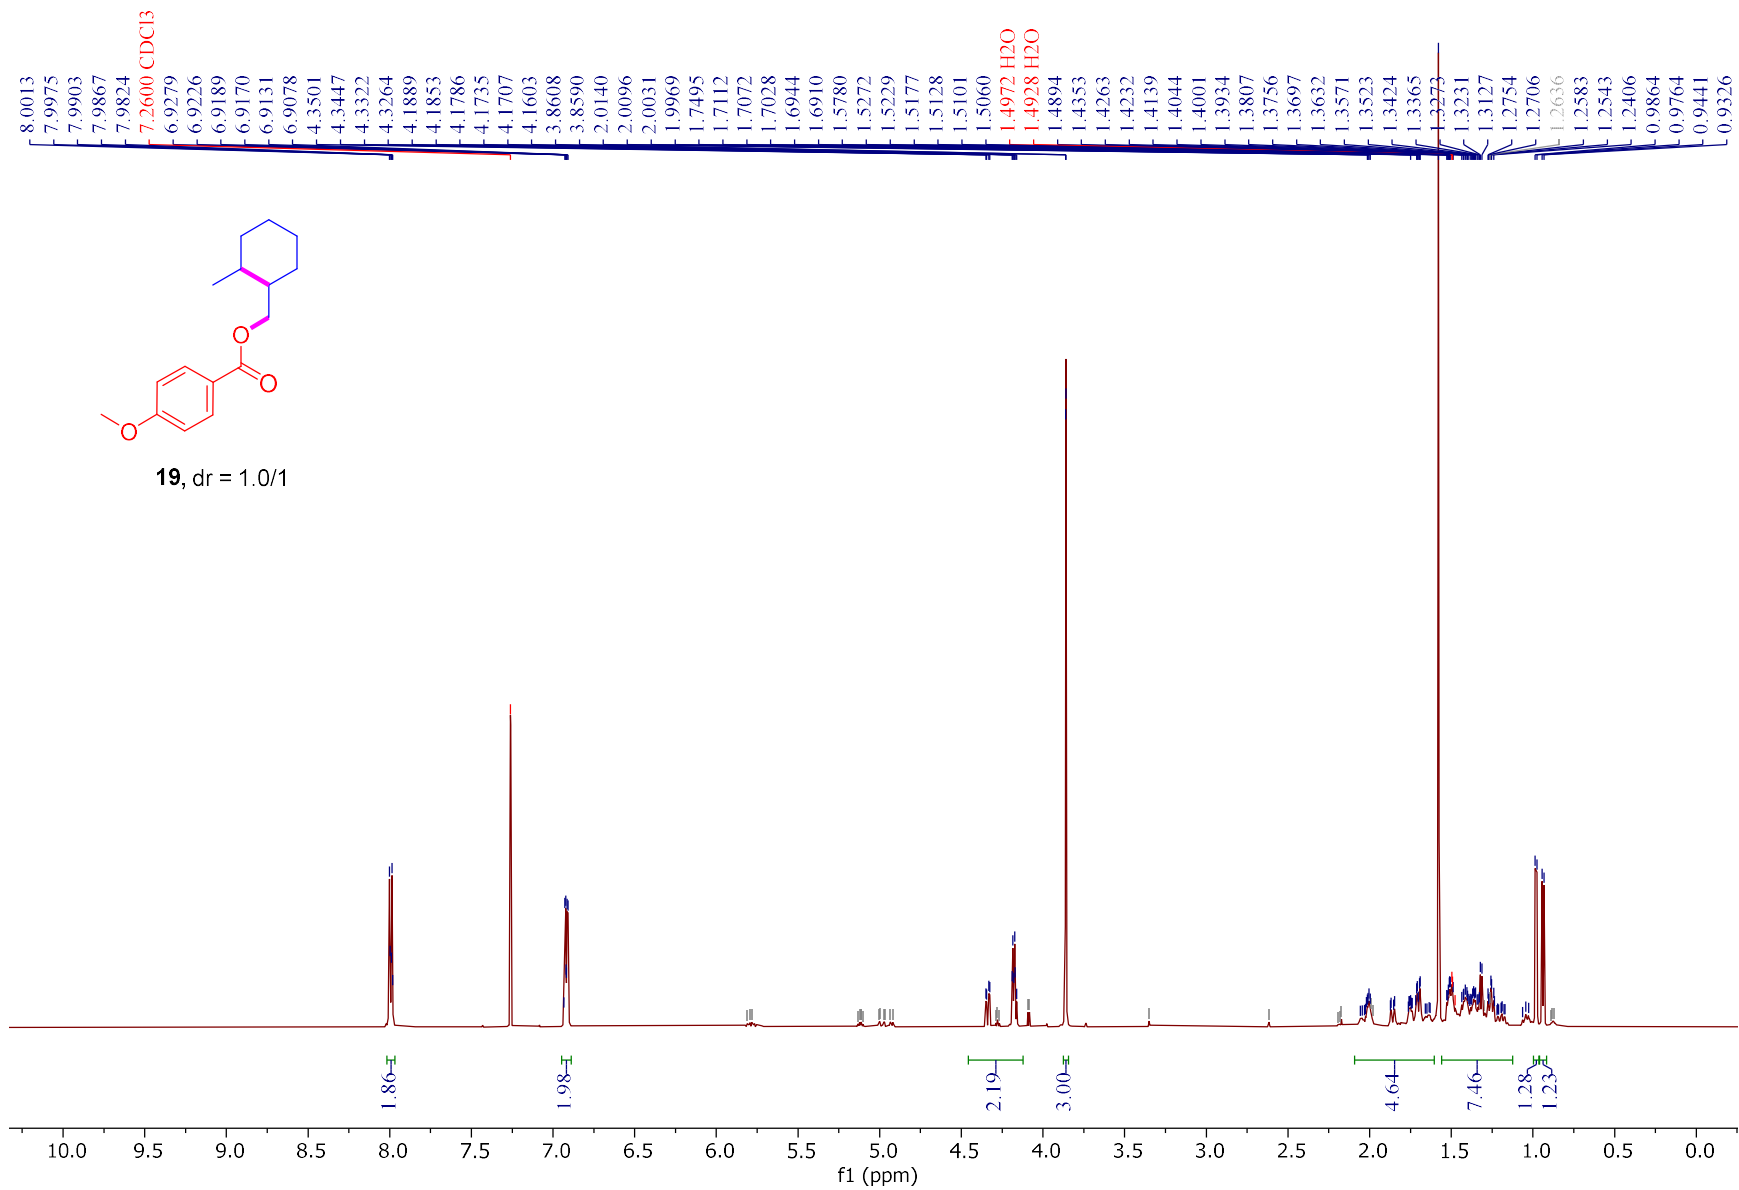

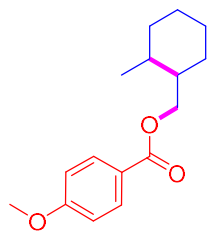

**19**, dr = 1.0/1

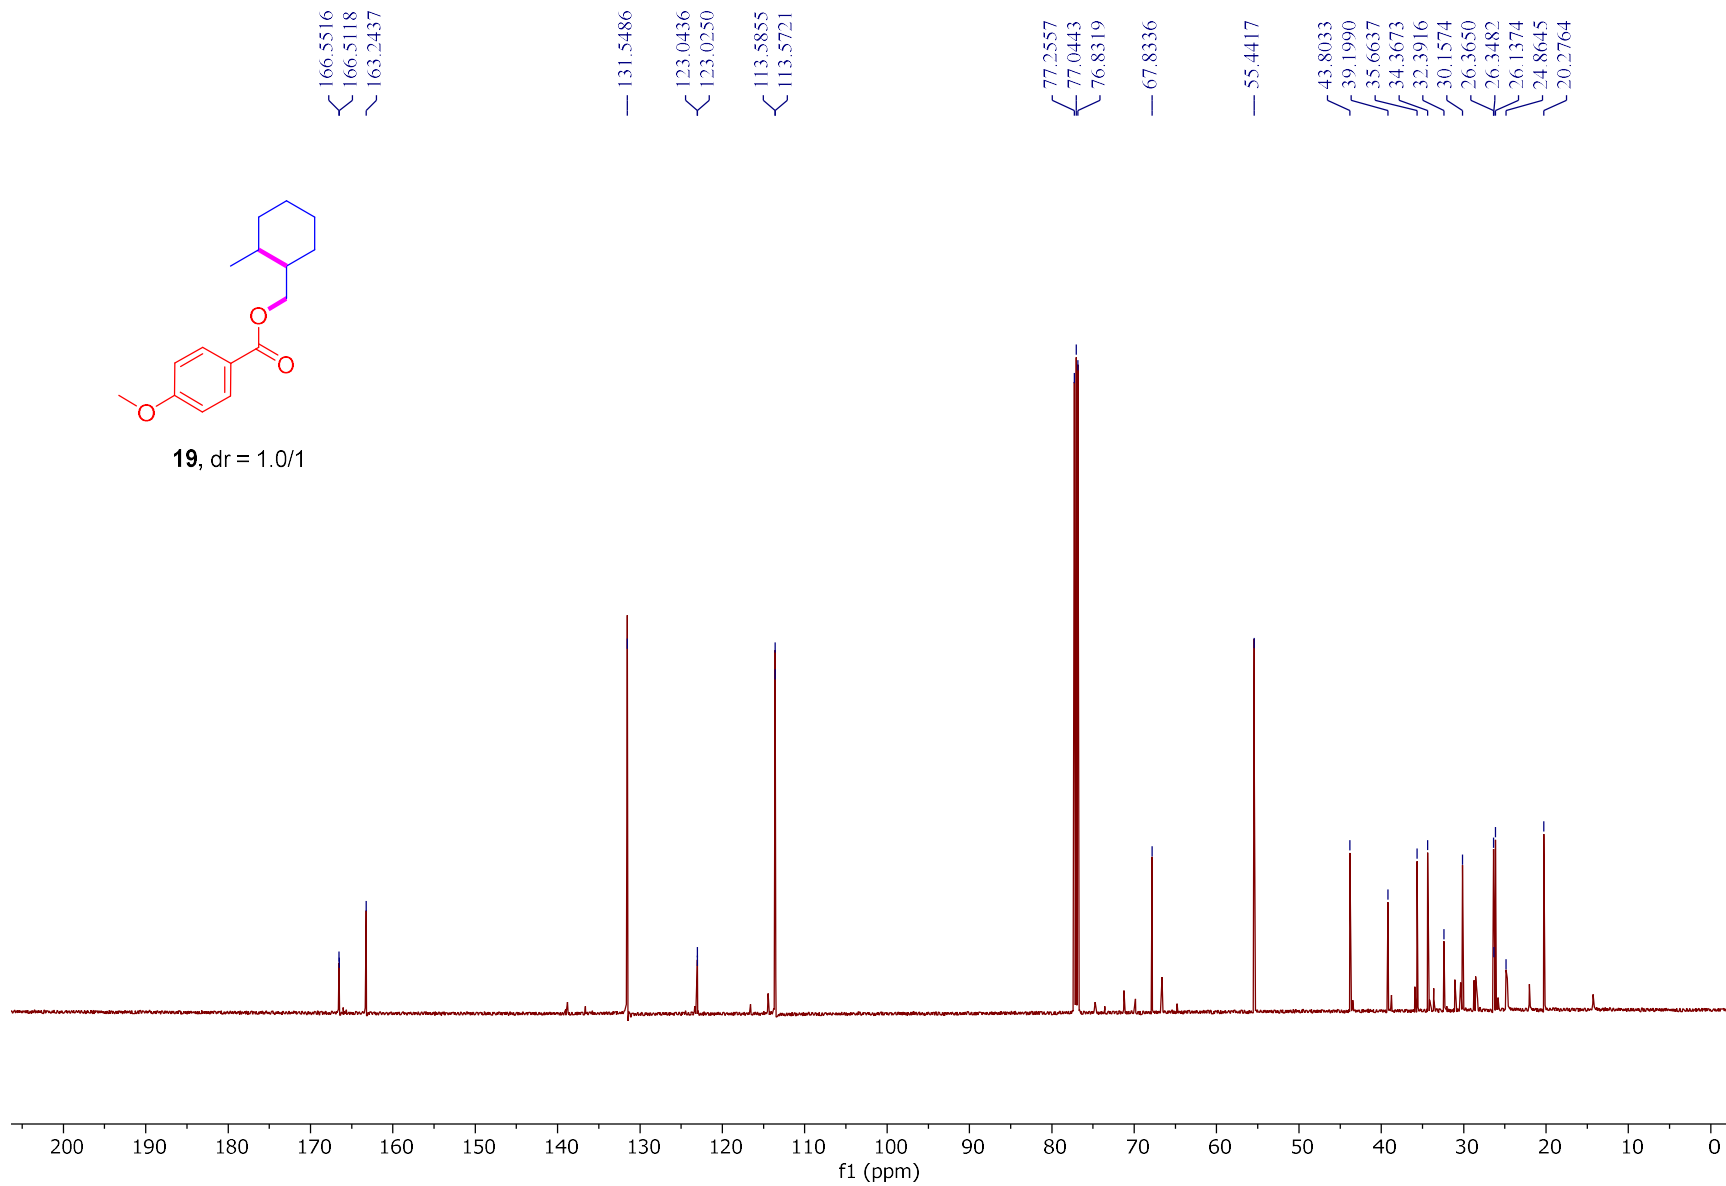

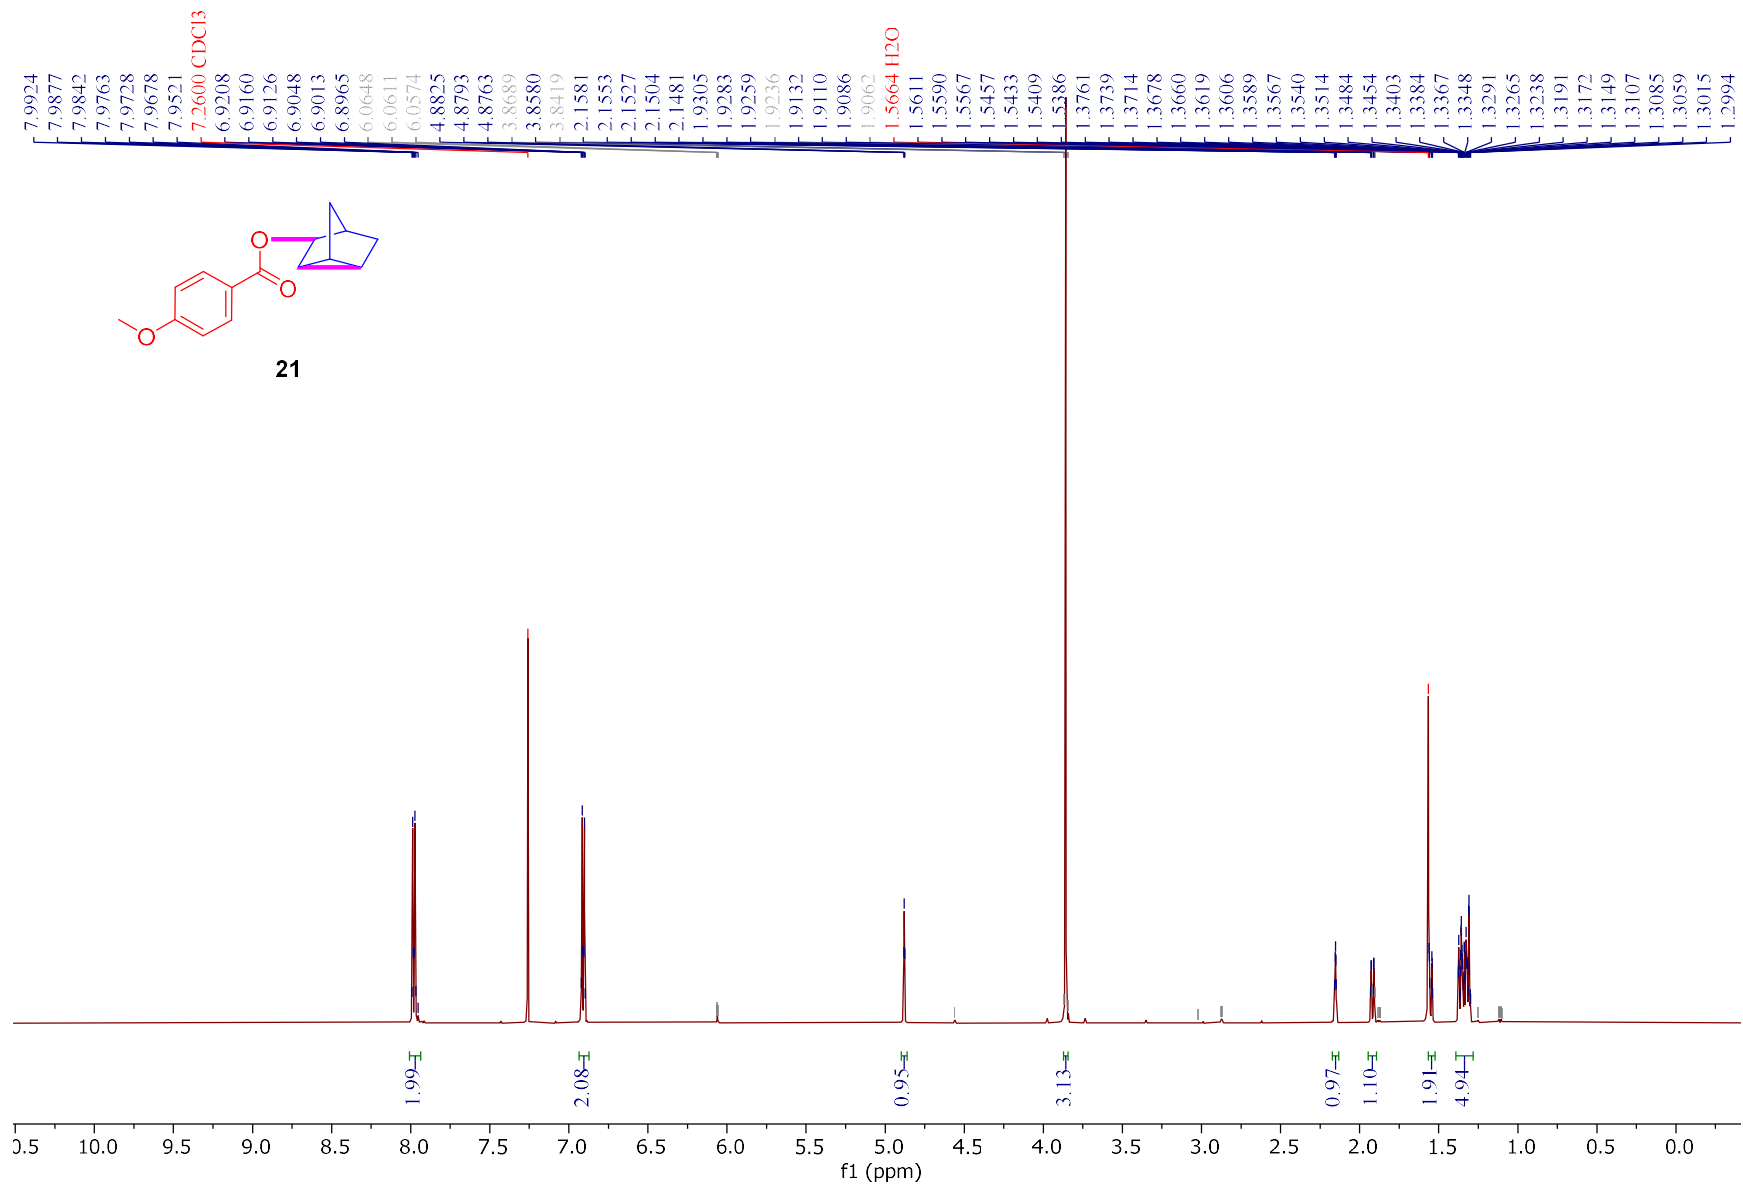

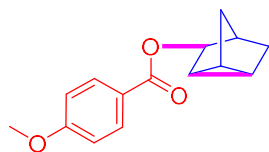

21

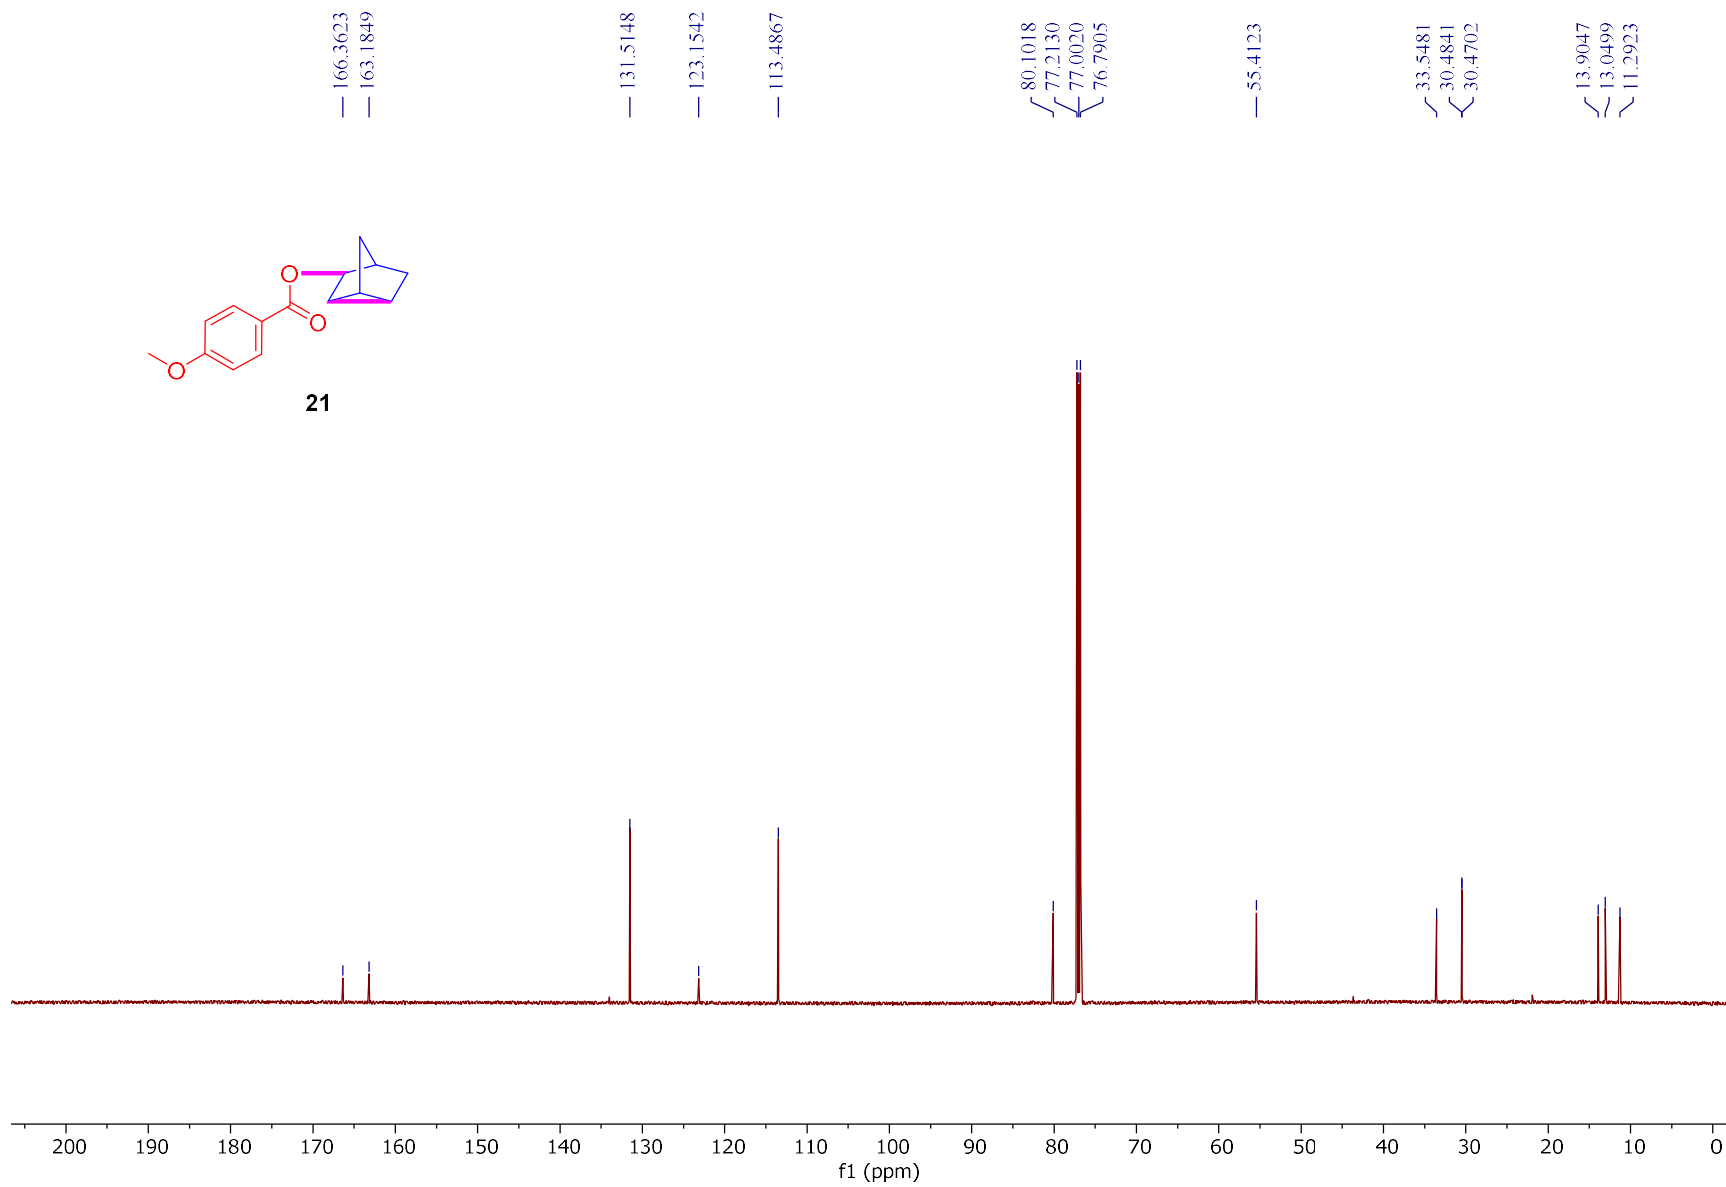



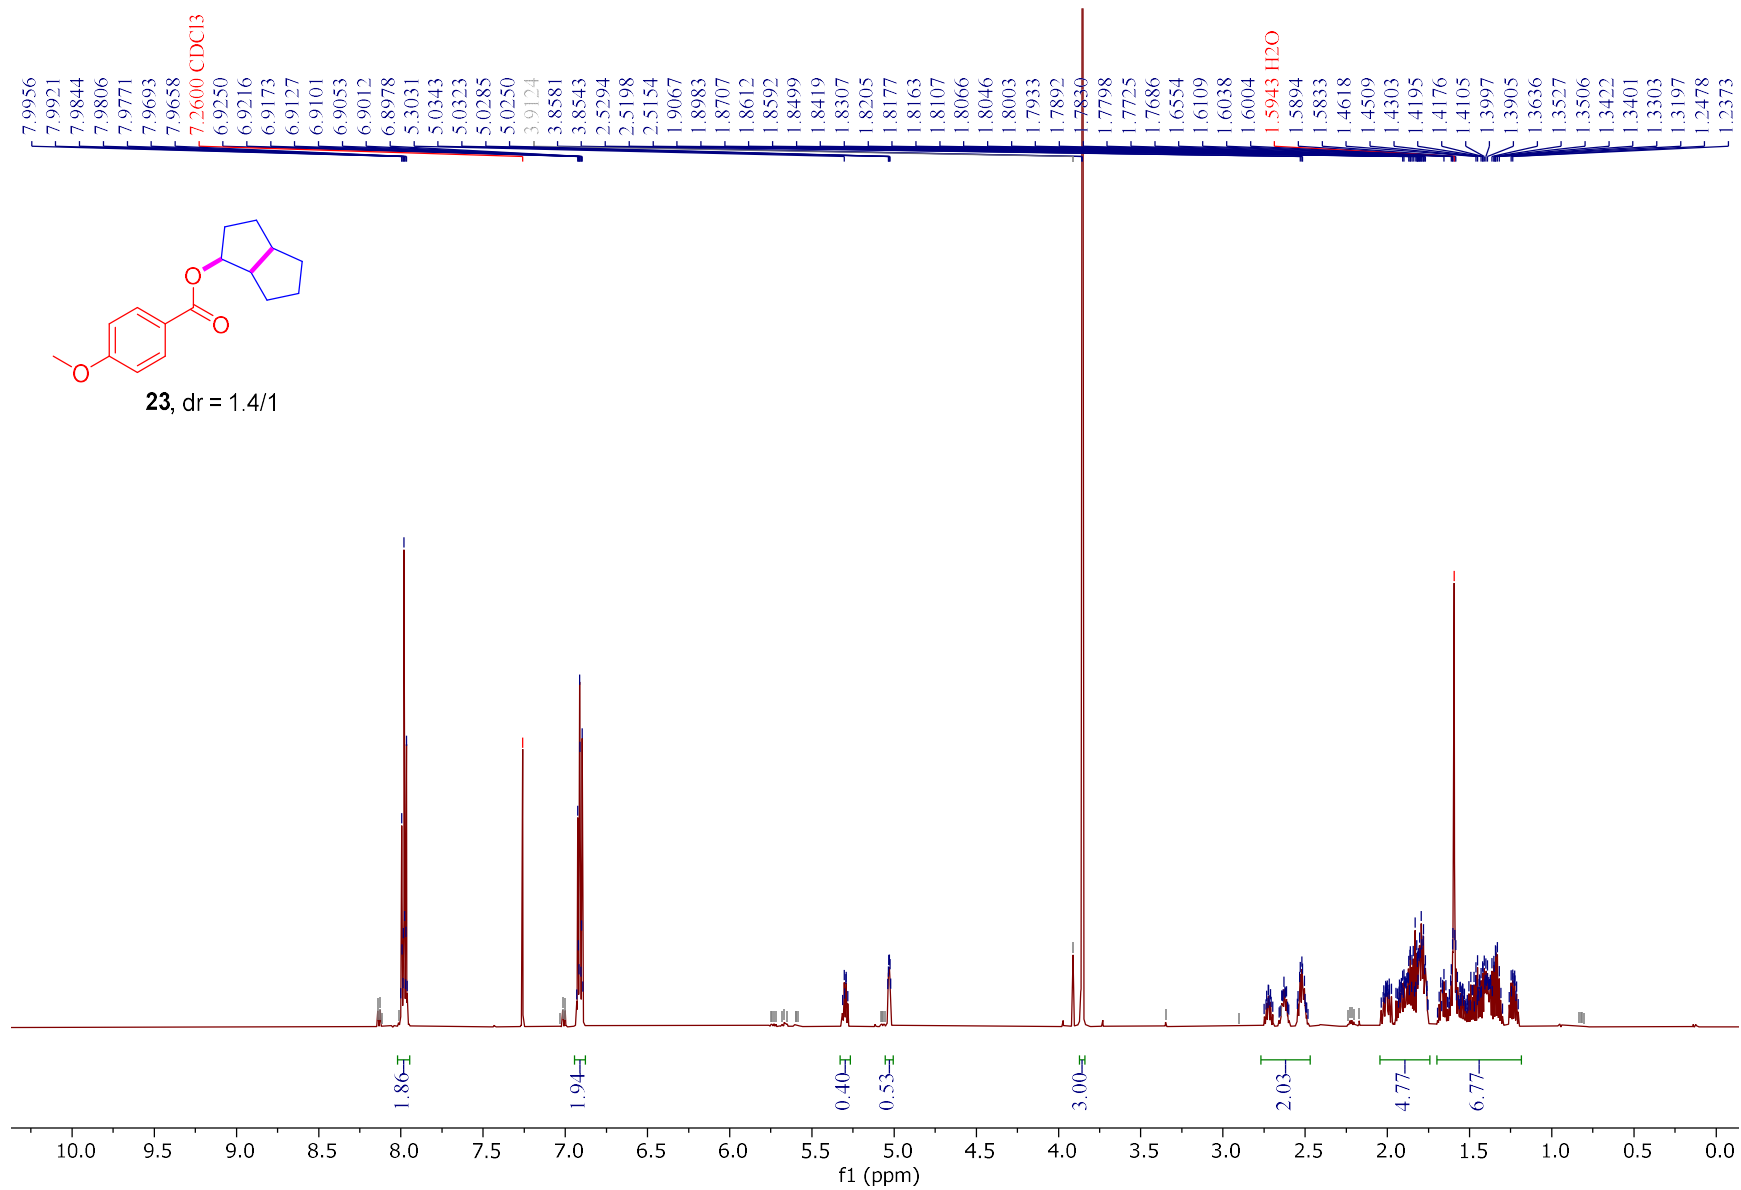

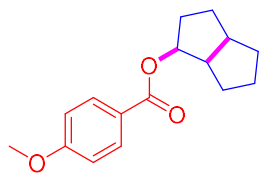

23, dr = 1.4/1

166.1611  
163.1999  
163.1531

131.5115  
123.4153  
123.2529  
113.5712  
113.4921

82.8227  
77.9760  
77.2537  
77.0409  
76.8291

55.4393  
49.9564  
45.9915  
42.6938  
41.9403  
34.5311  
34.1802  
31.9003  
31.6996  
31.3990  
30.6773  
29.5832  
27.6352  
27.4910  
26.8136

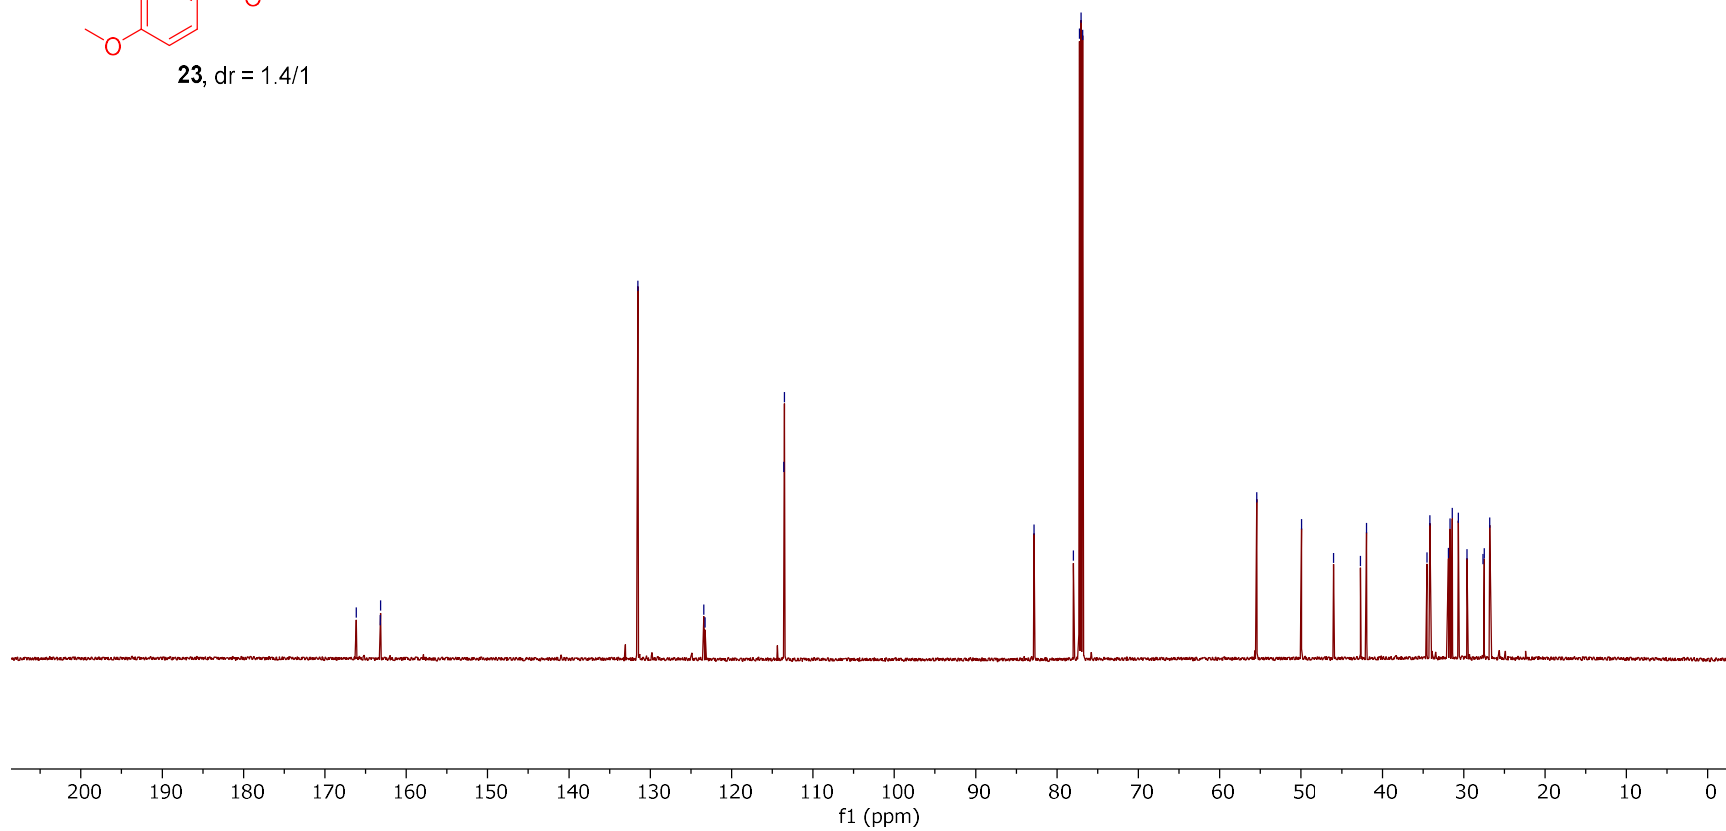

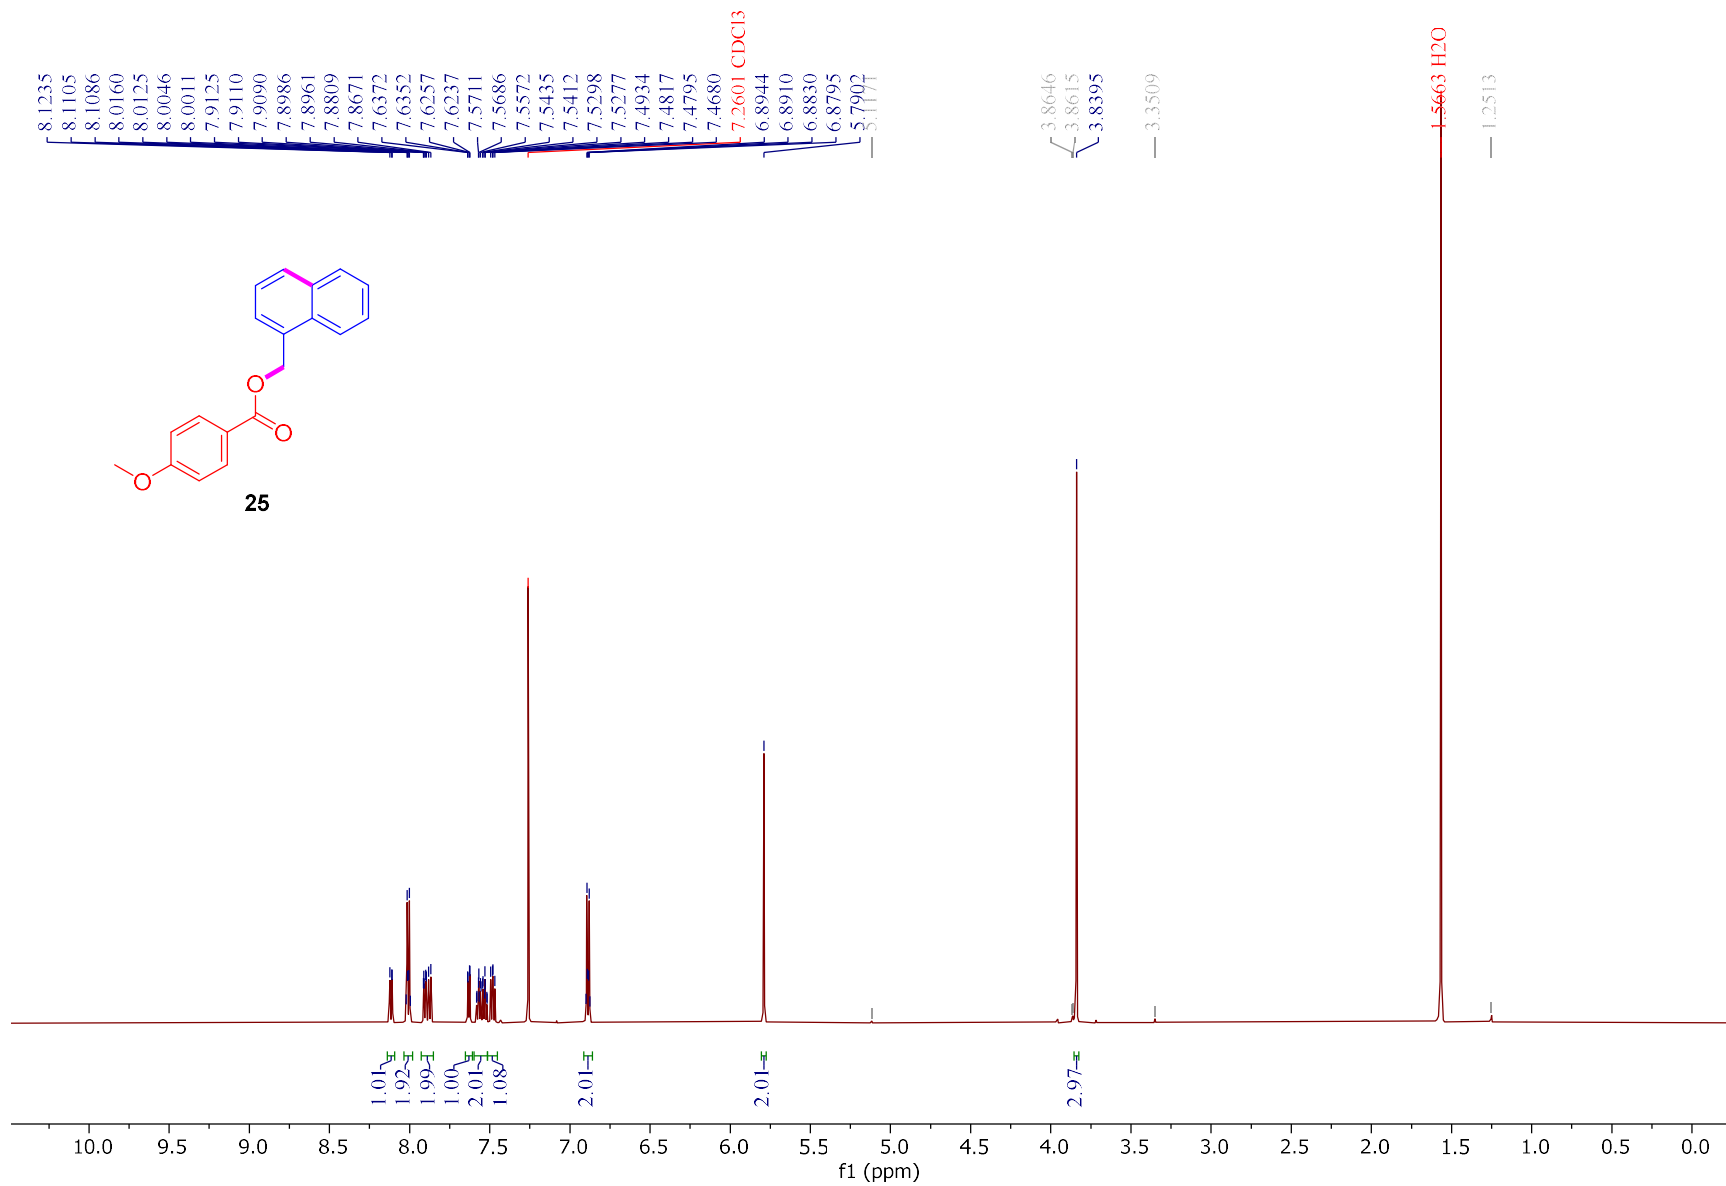

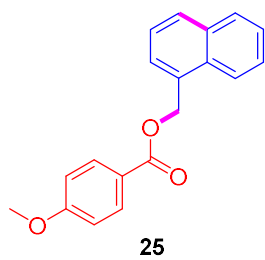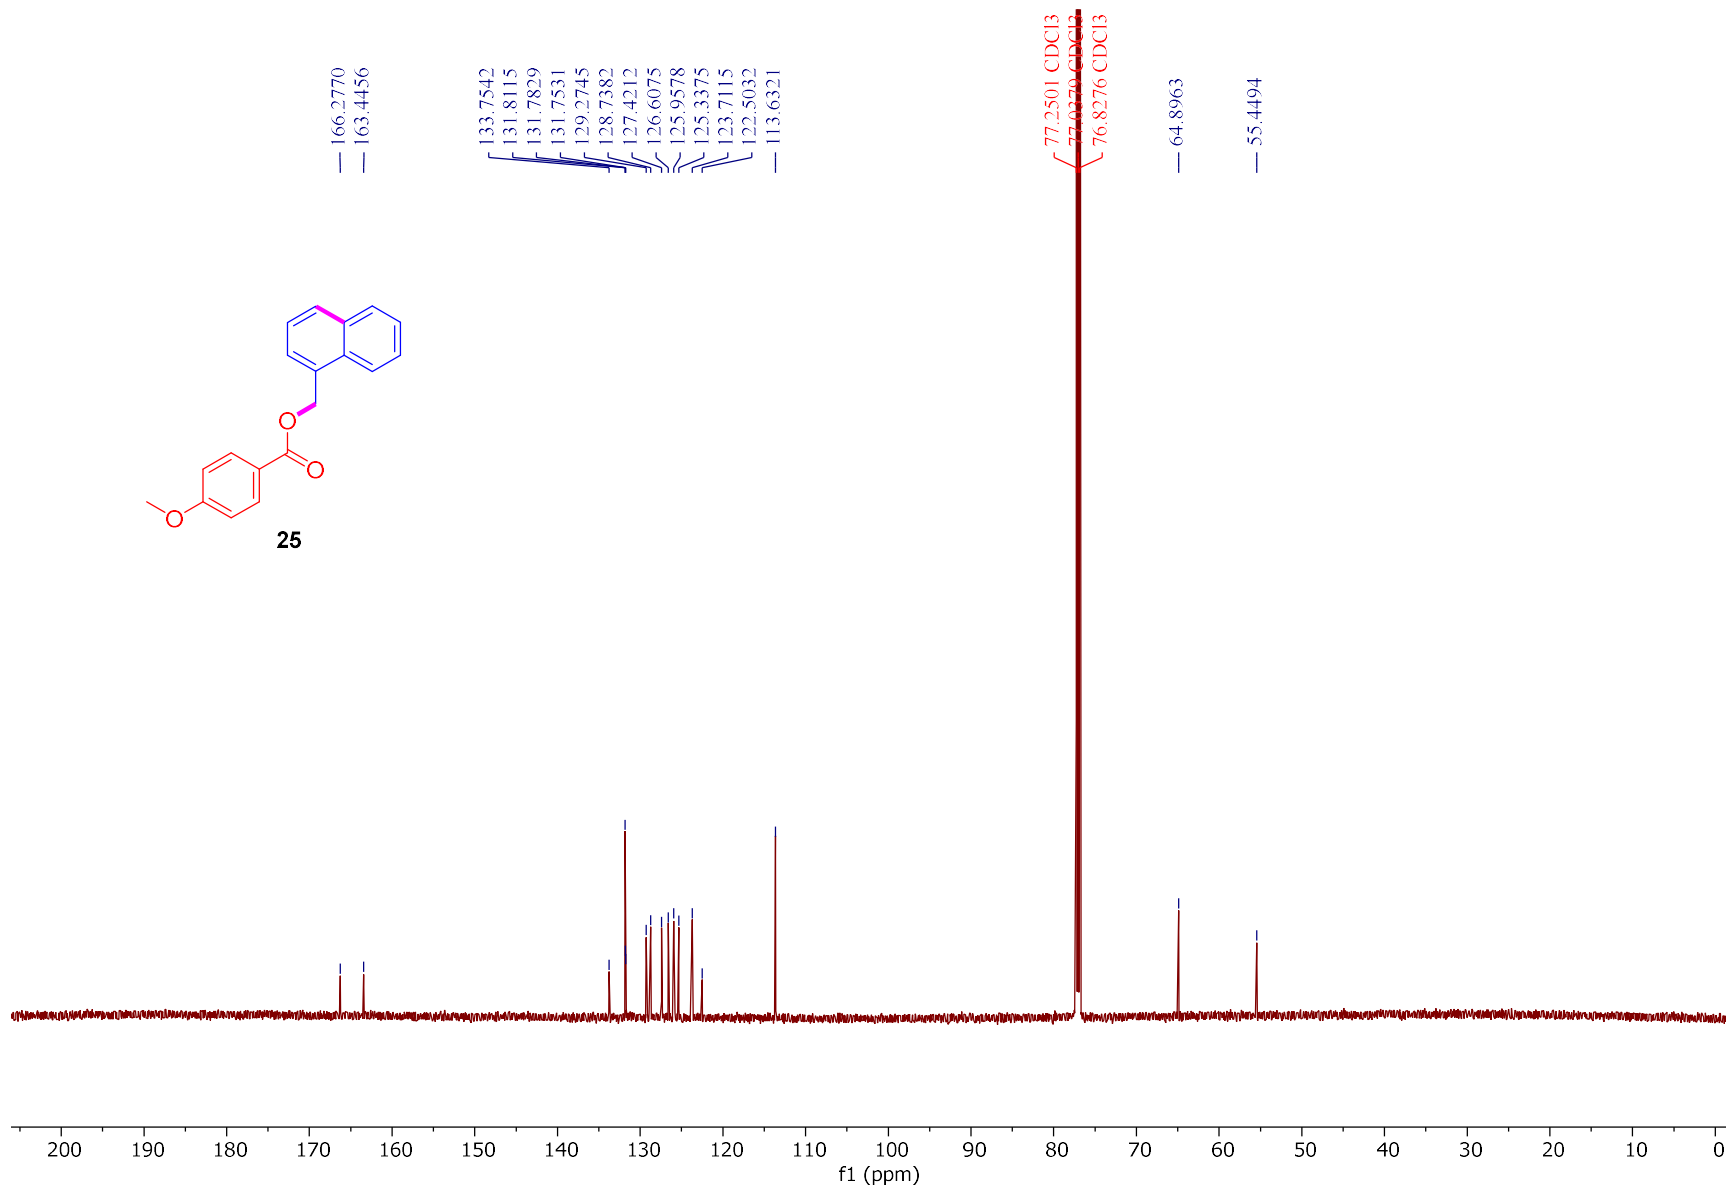

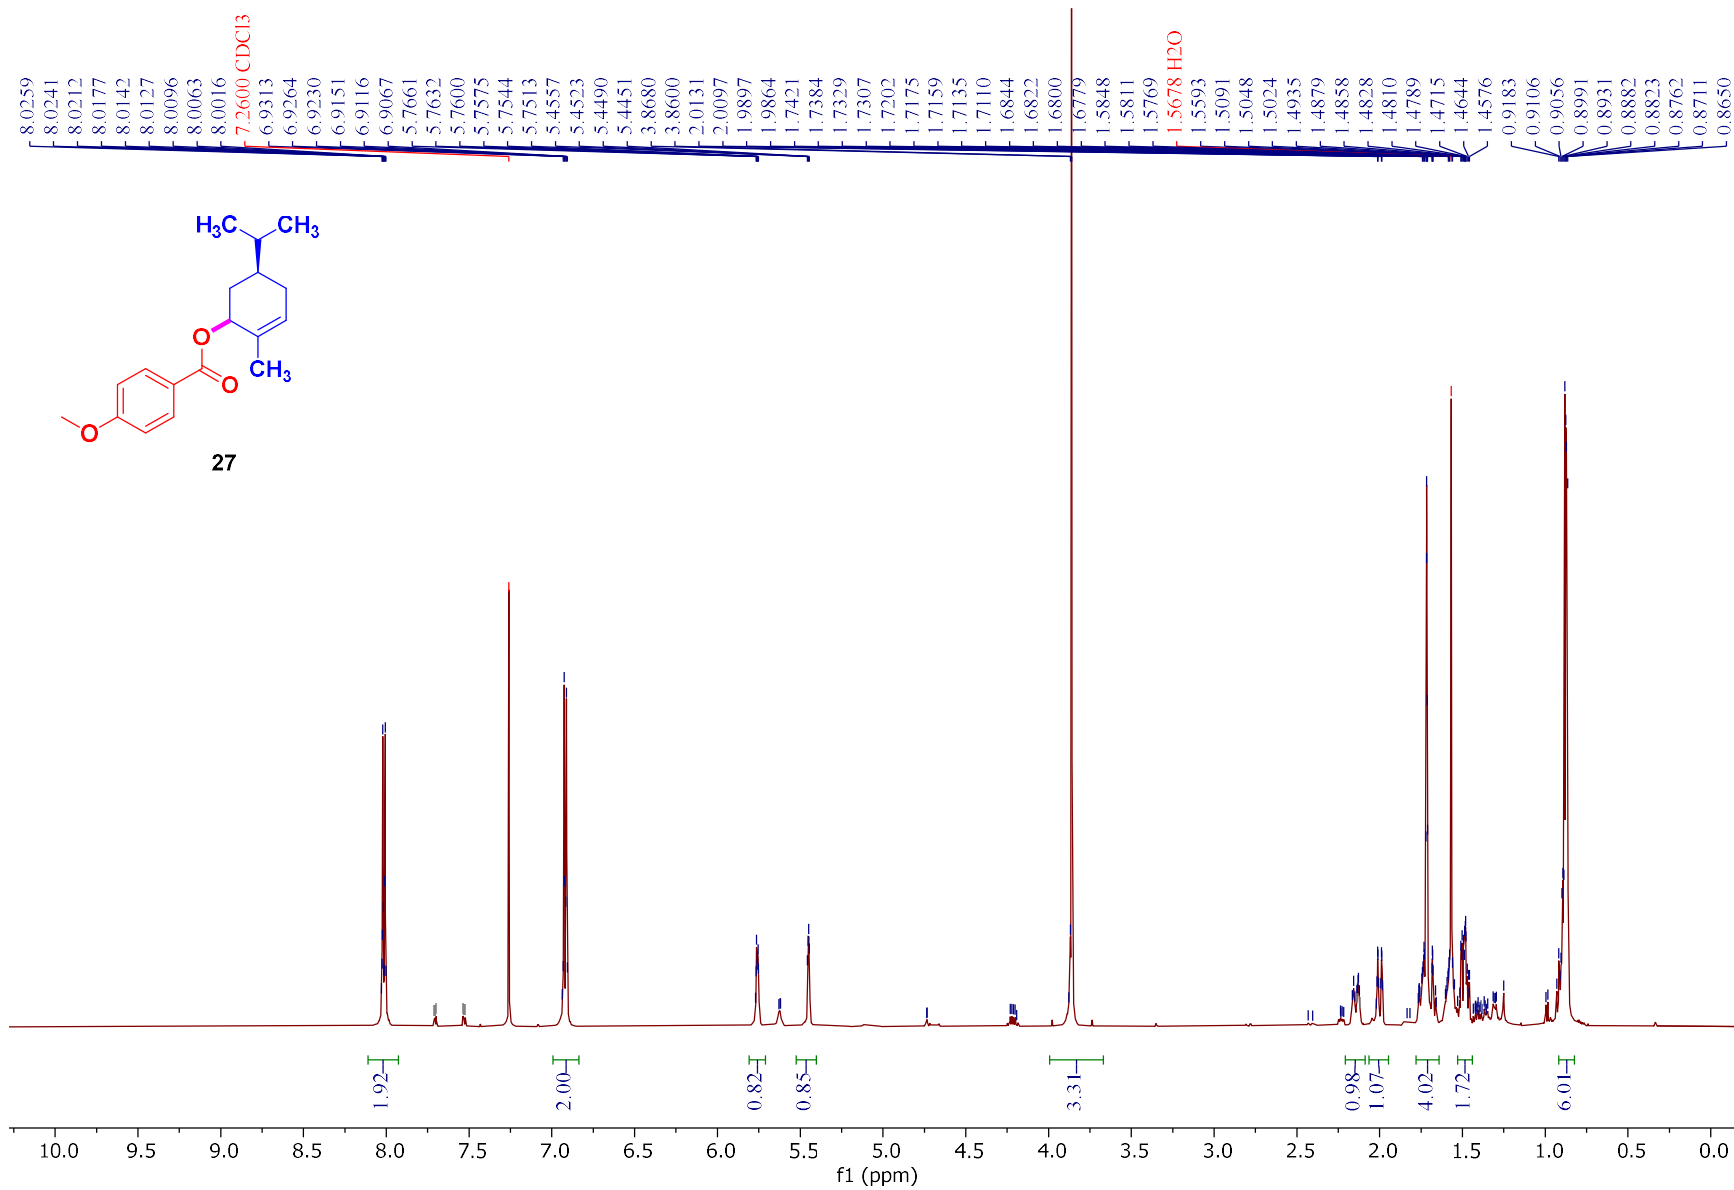

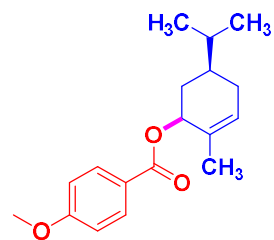

27

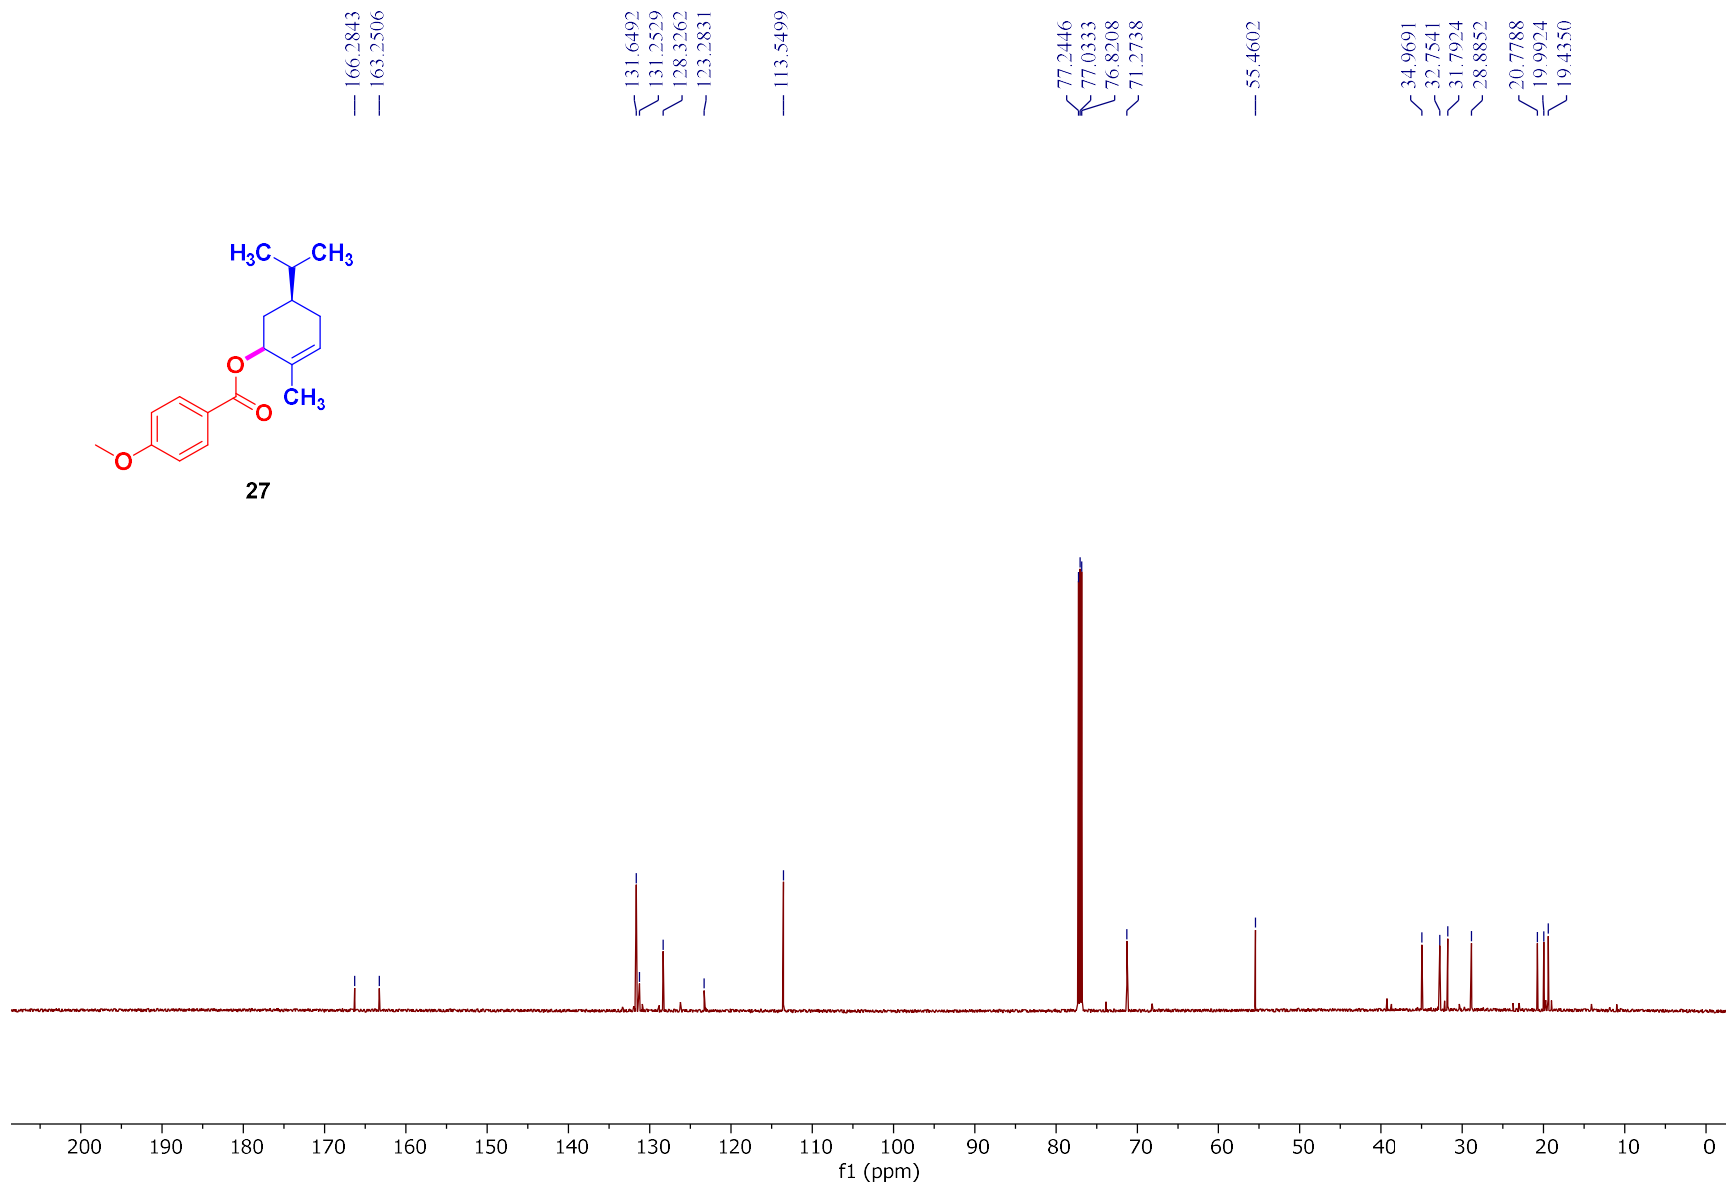

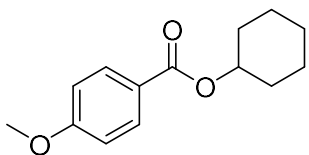

**4a**, original NMR in DMSO  
used as standard NMR

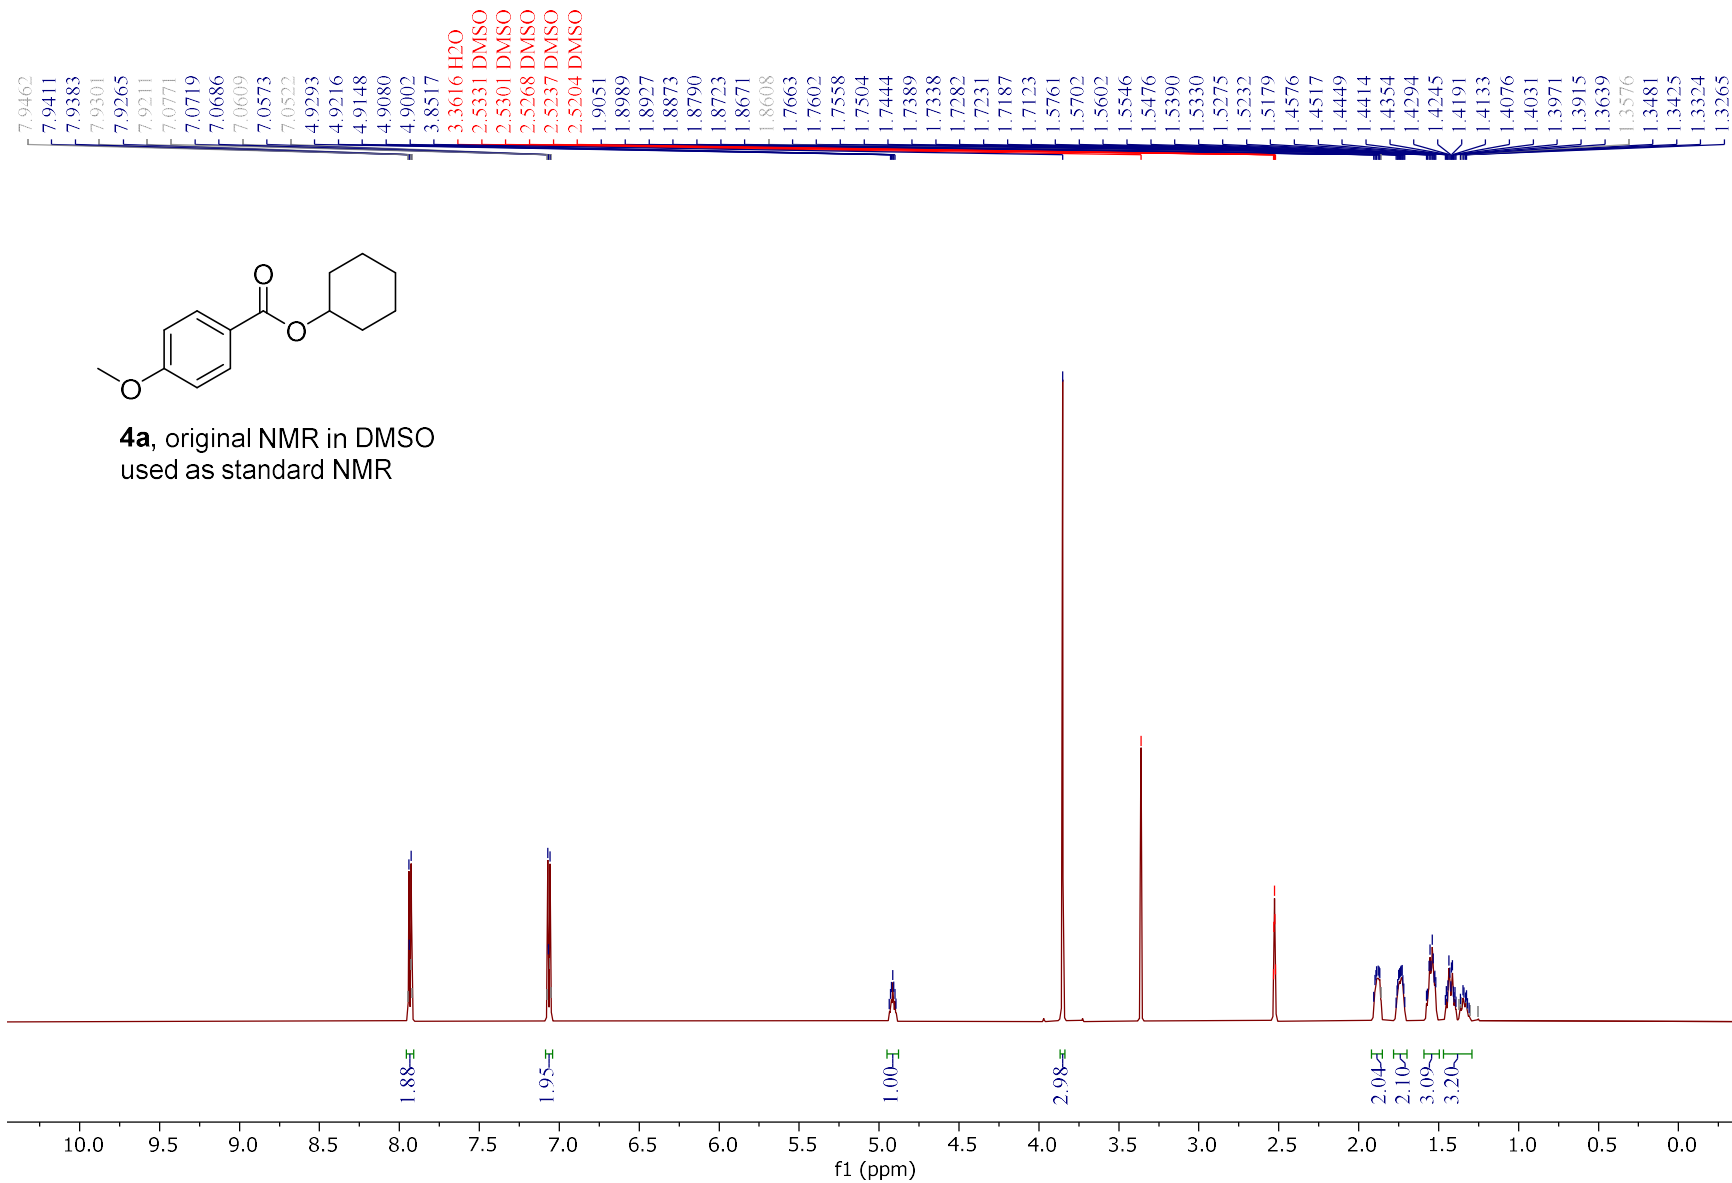

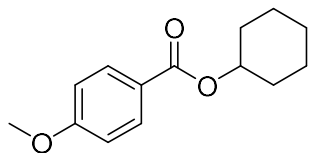

4a, conducted in DCM-d2

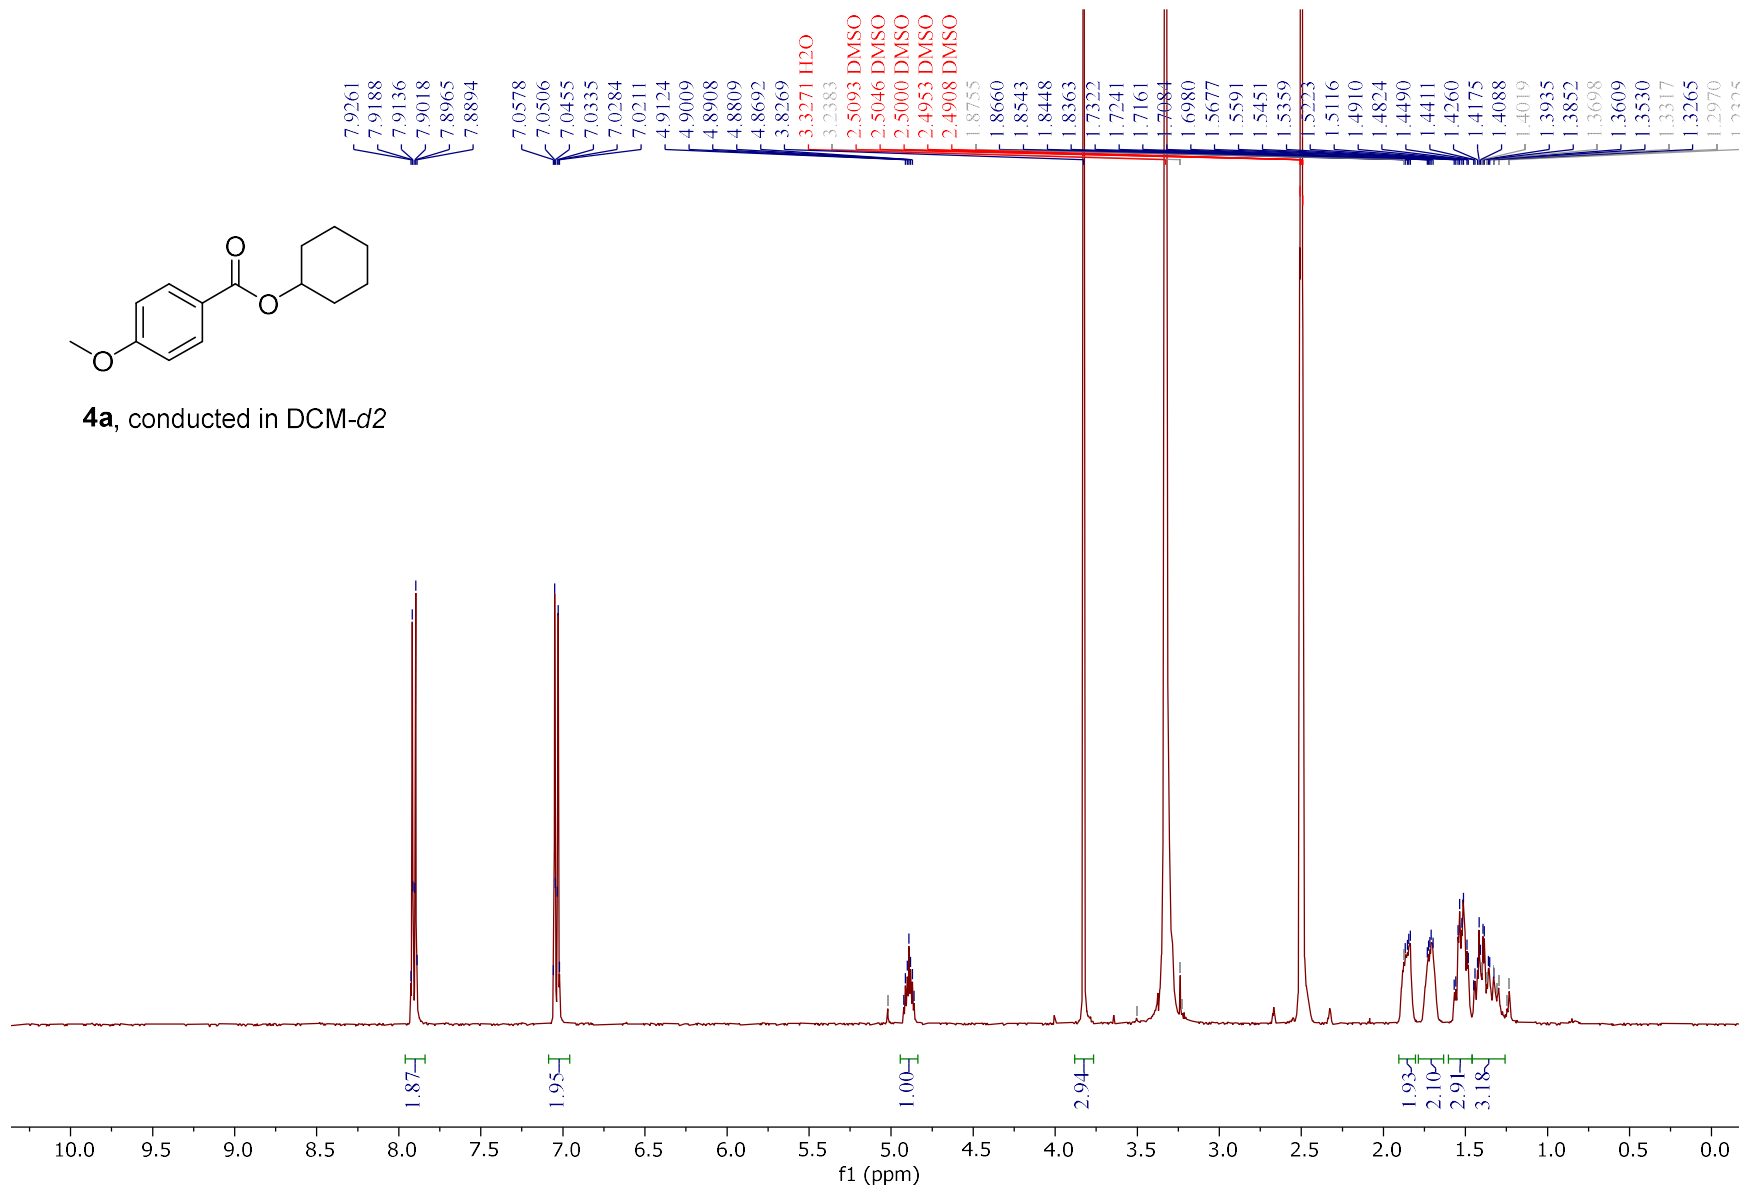



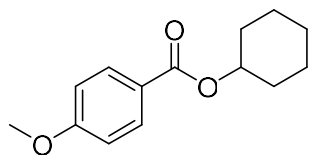

4a, conducted in DCM-d2/DCM = 1/1

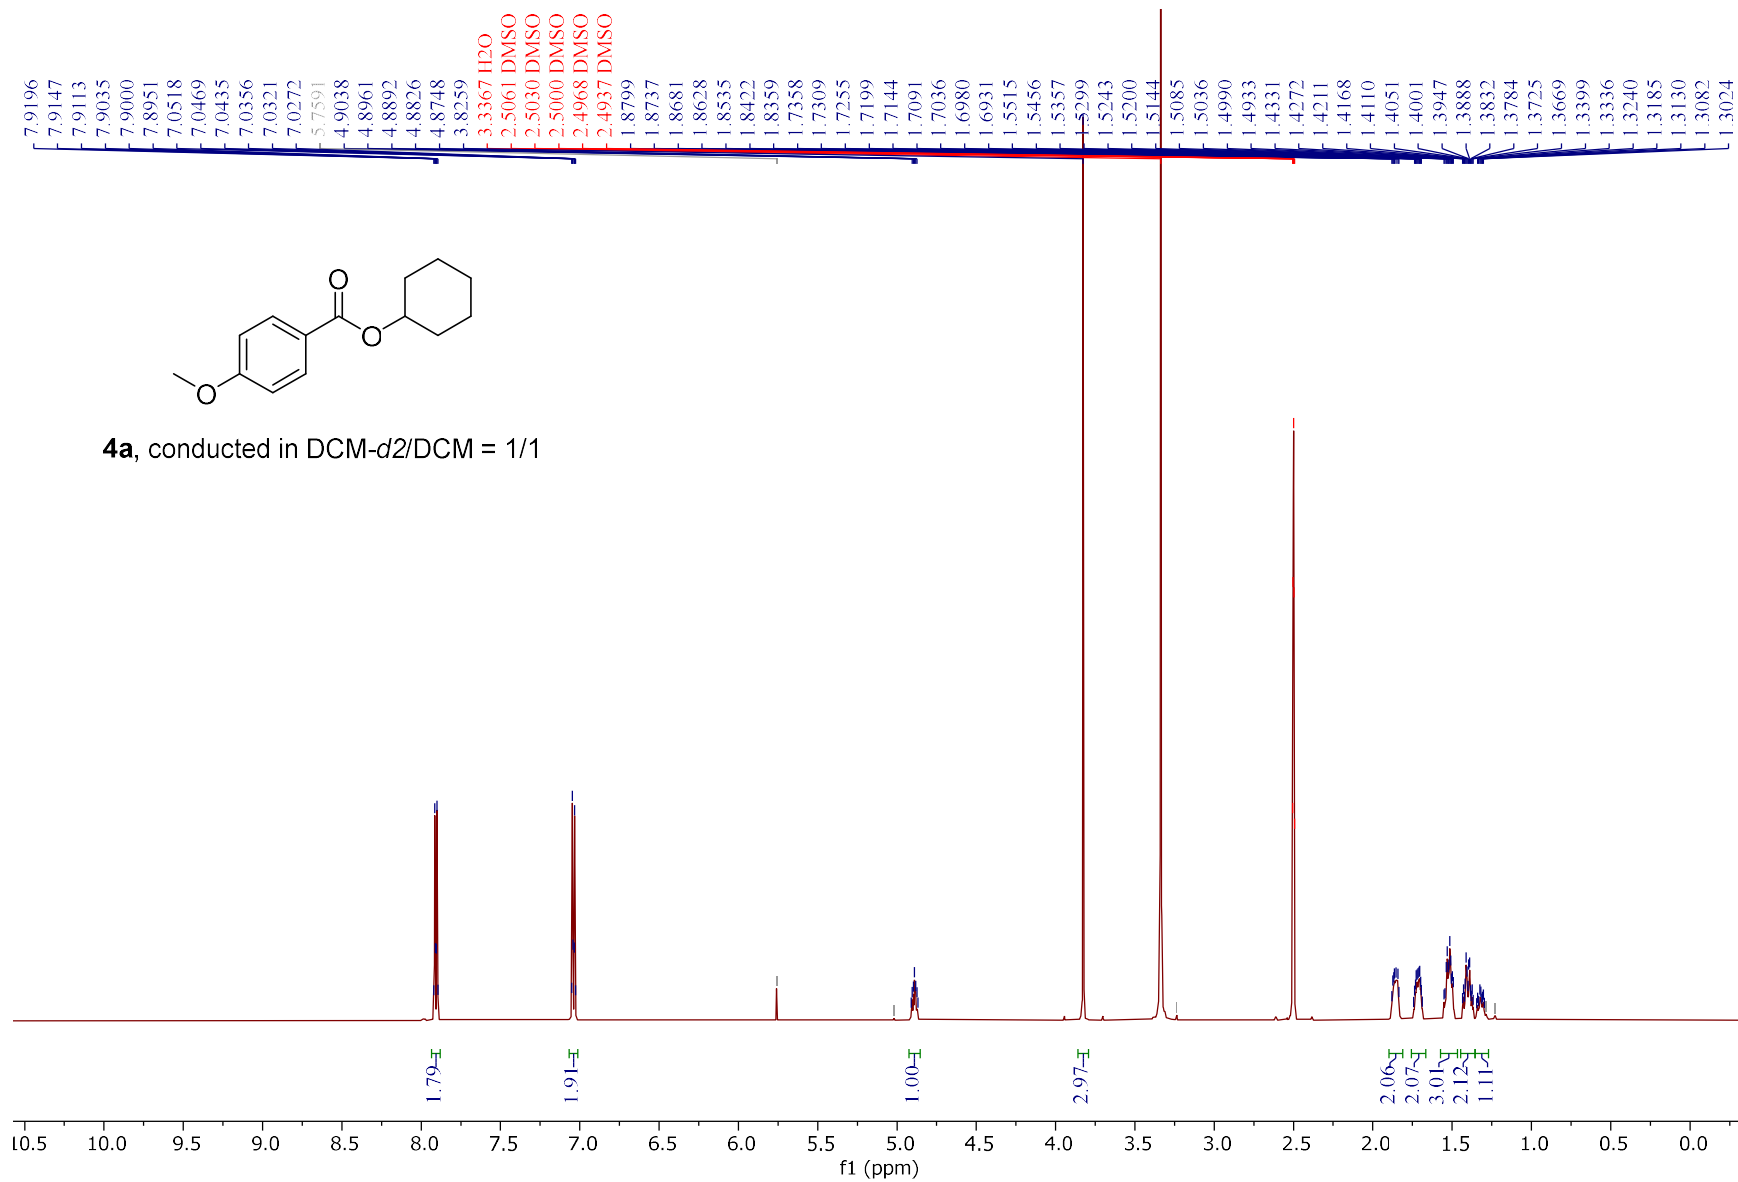

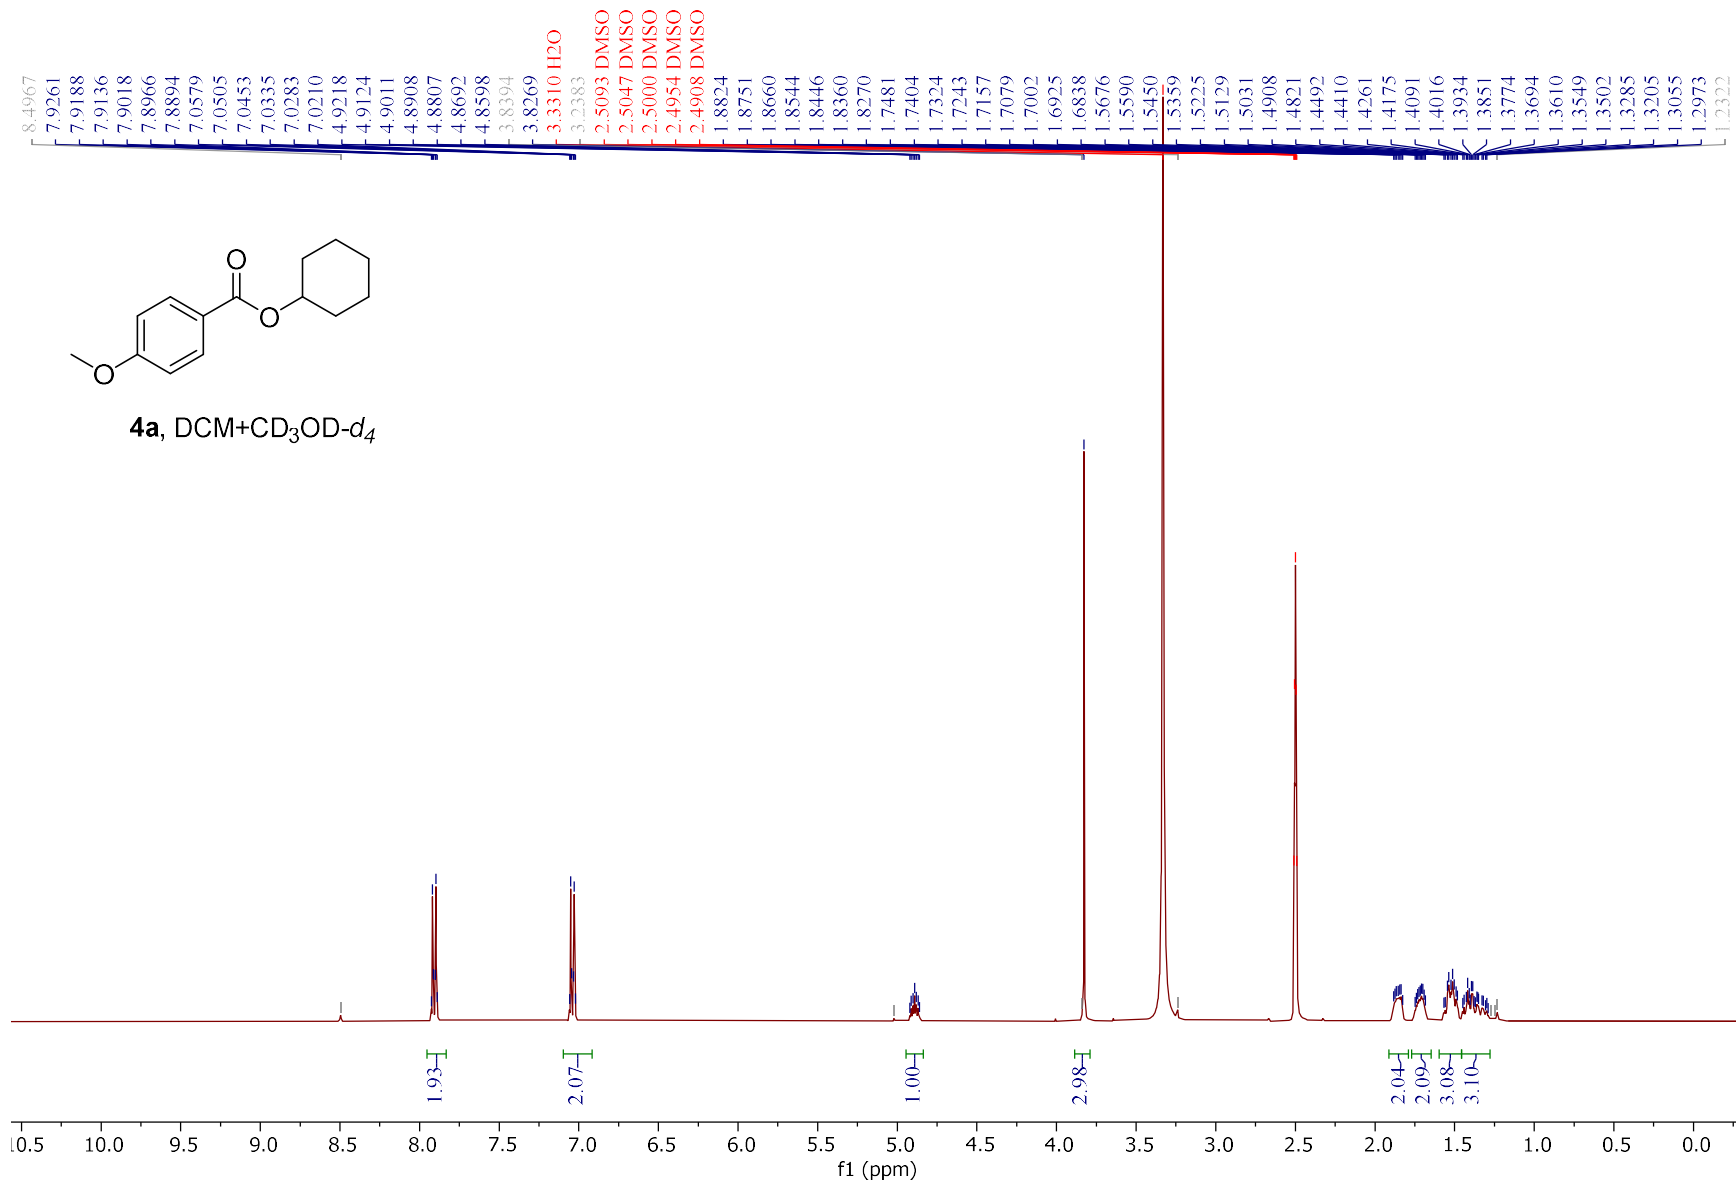

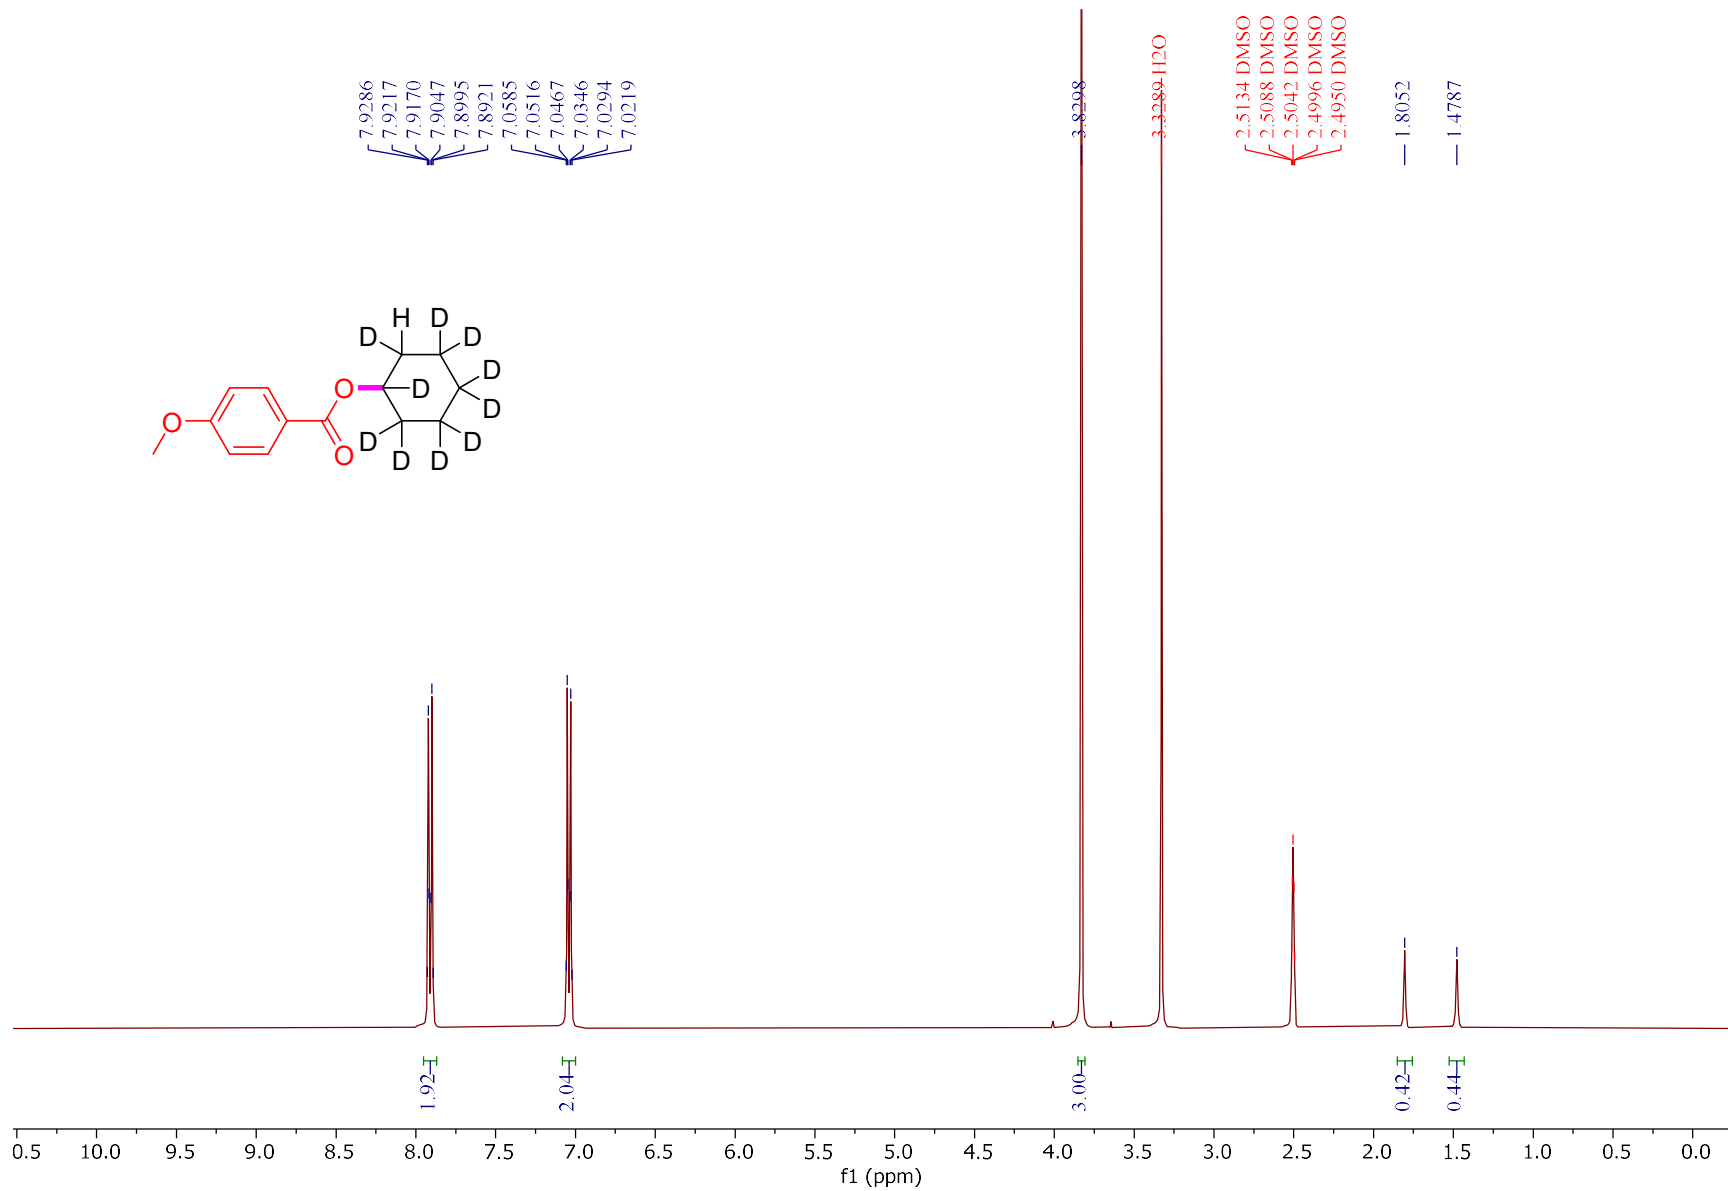

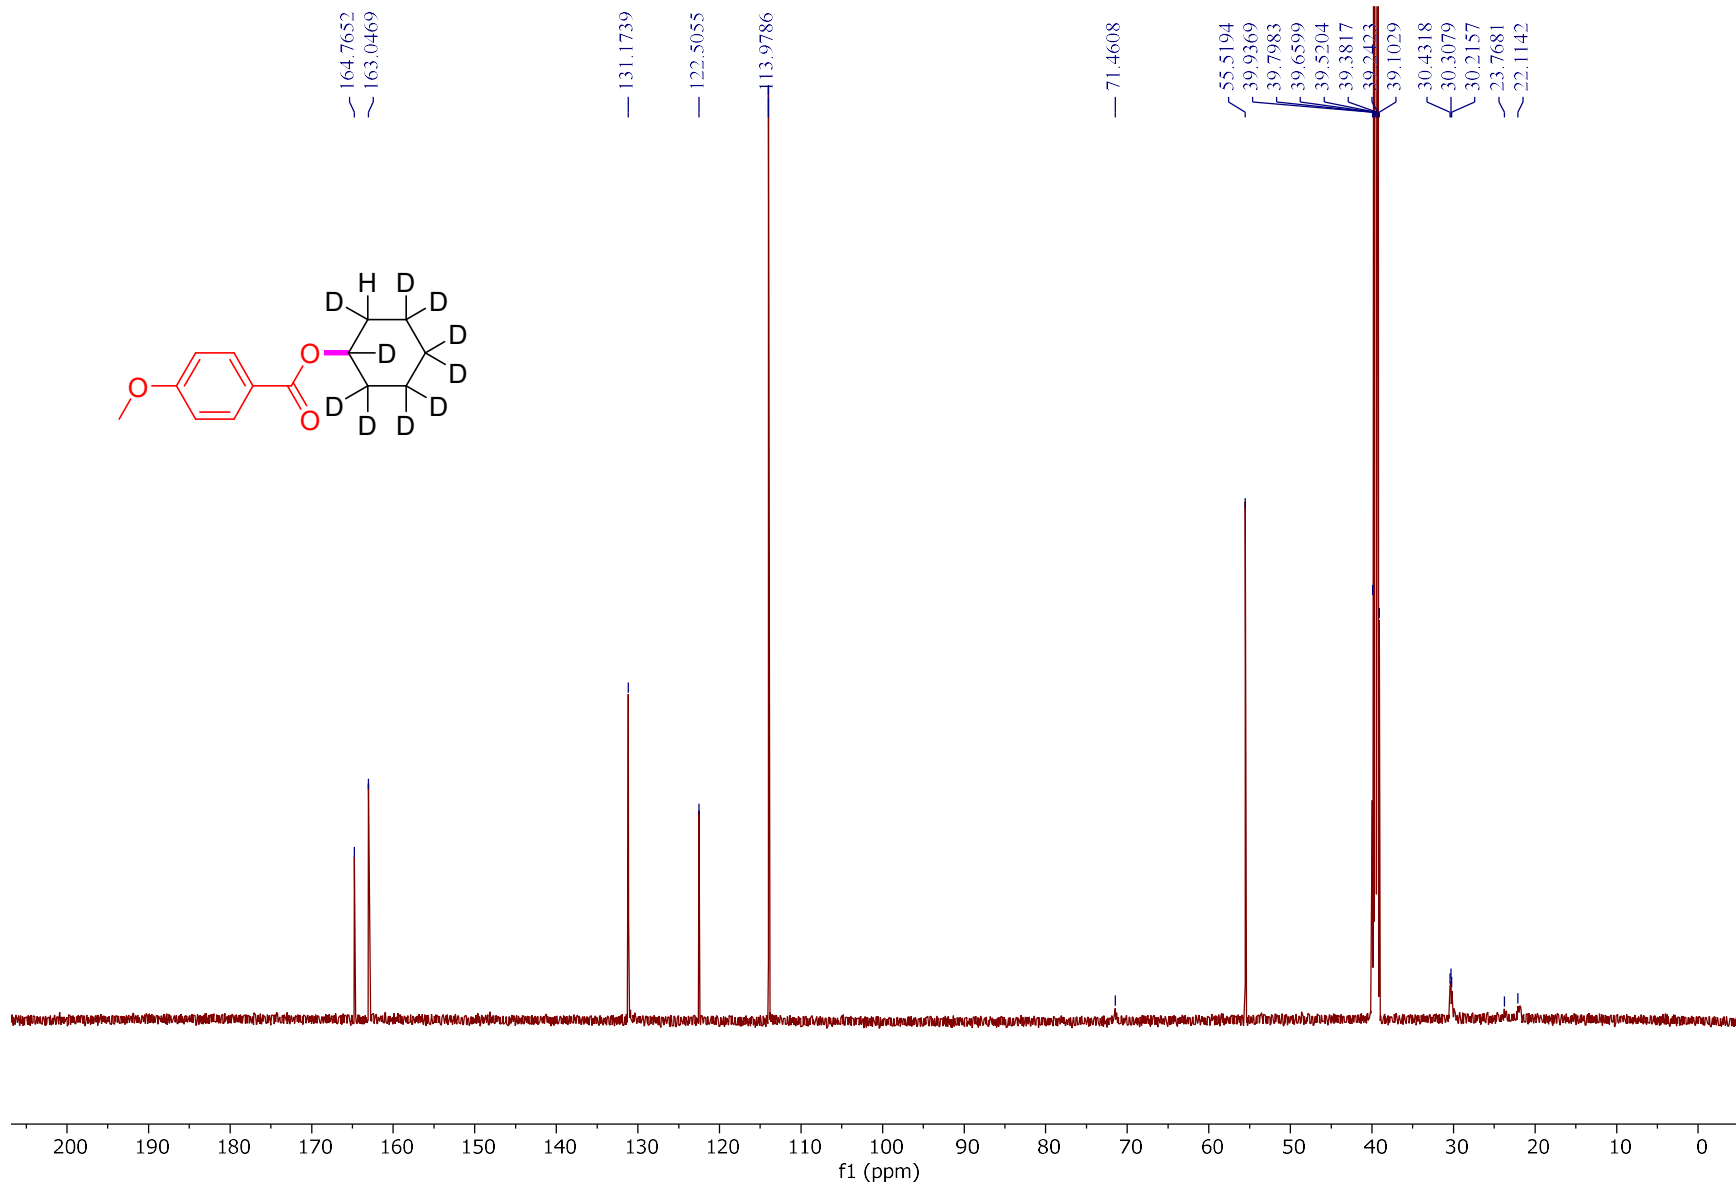

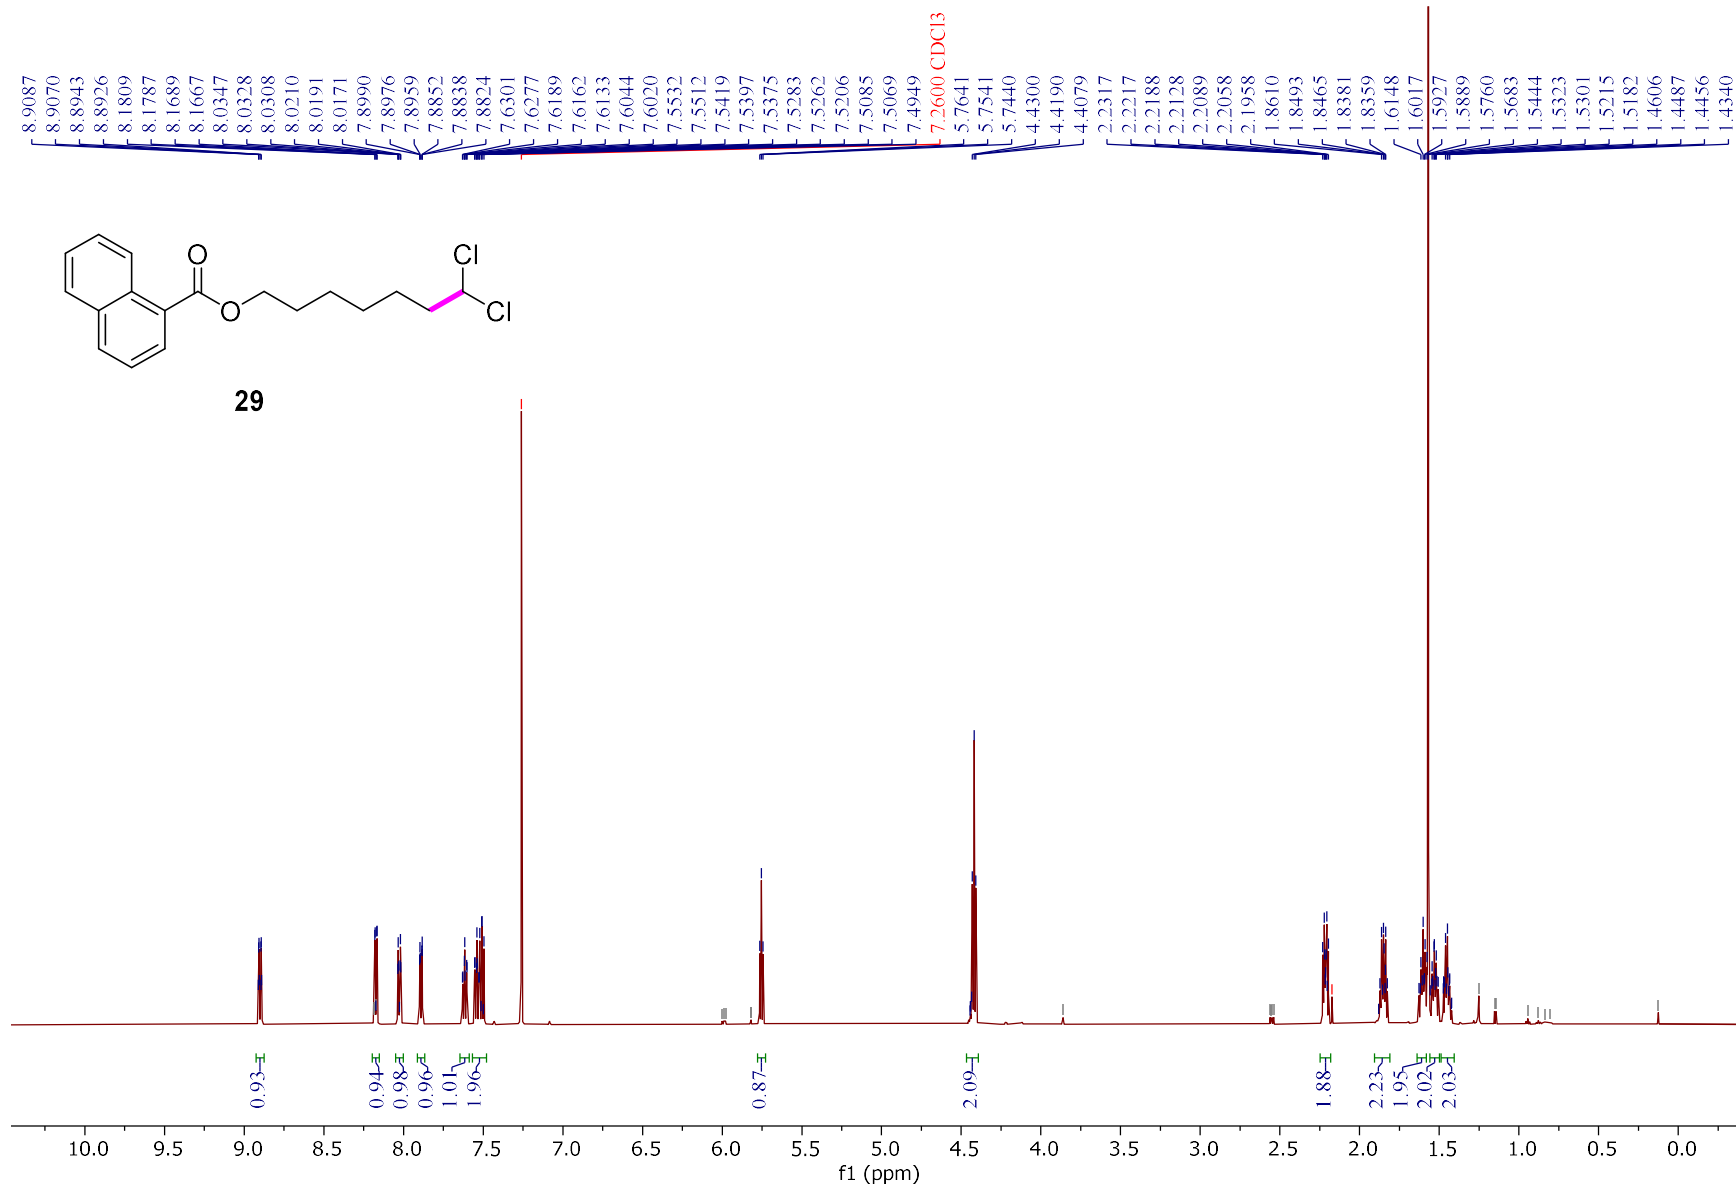

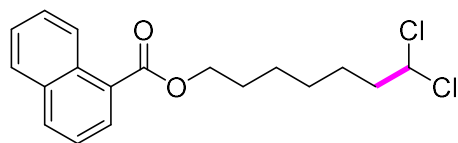

29

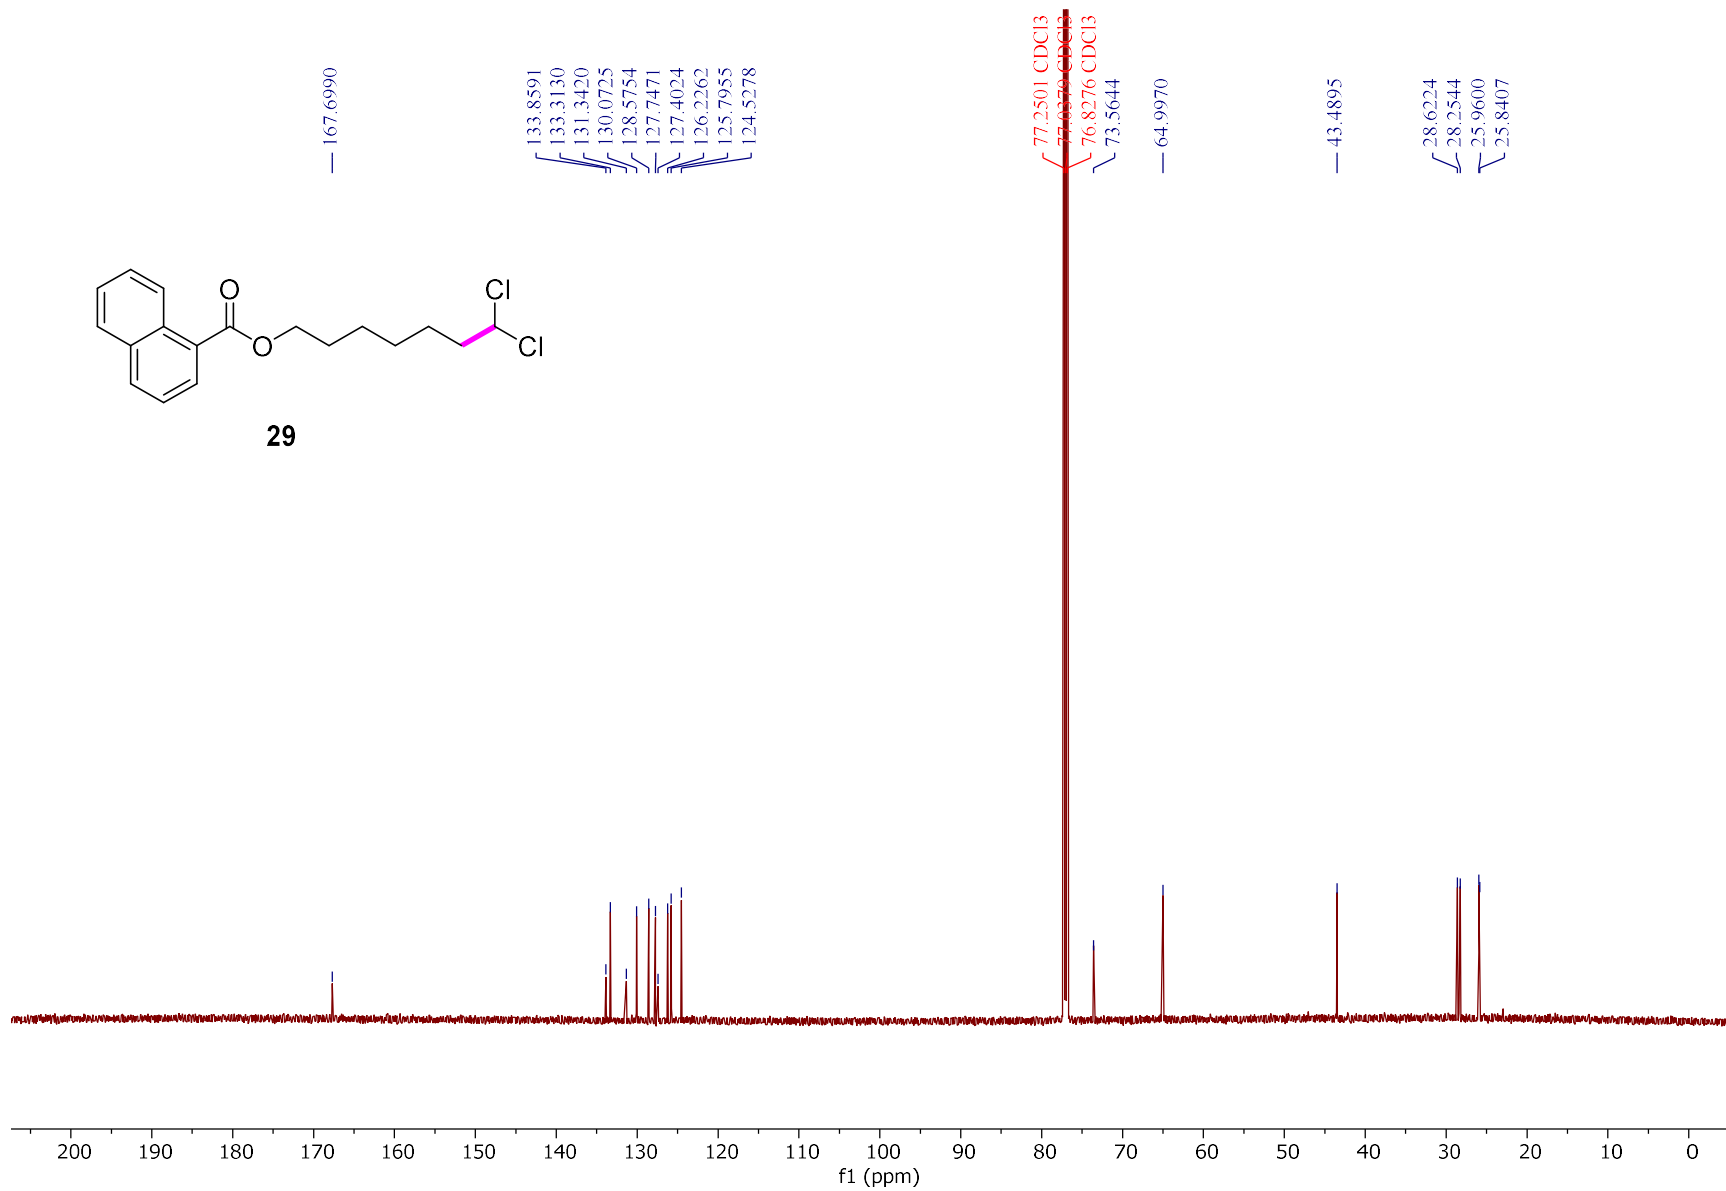

Supplement: NIHMS1776656-supplement-Supporting_information.pdf [file NIHMS1776656-supplement-Supporting_information.pdf]
